# Supplementary material
Source: Research Square preprint supplement (doi:10.21203/rs.3.rs-9275884/v1)
Supplement: Supplementary file 1 [file 4b7f85ed643712be92416c5b.xlsx]

## Sheet: BM
ID	Description	setSize	enrichmentScore	NES	pvalue	p.adjust	qvalue	rank	leading_edge	core_enrichment	ontology
GO:0000278	mitotic cell cycle	78	-0.447334	-1.97655	2.6602e-05	0.0203665	0.0167623	2581	tags=41%, list=21%, signal=33%	BTG1/CCNB3/CASP2/TUBA1A/MYBL2/CHMP4B/MYC/ANAPC5/RAN/CENPT/PPP2CB/DCTN2/TUBB3/NDC80/FAM175A/DCTN1/NBN/TUBB1/PSME3/TUBB4B/SPAST/CHMP2A/ASNS/MASTL/MSH6/TUB4A/PAFAH1B1/NSFL1C/ENSA/RAD51/TIPIN/RB1	BP
GO:0007166	cell surface receptor signaling pathway	213	0.36856	1.68735	4.55627e-05	0.0203665	0.0167623	2942	tags=37%, list=24%, signal=29%	FOSL2/SOX11/FZD4/VEGFA/WWOX/NRP1/PTPRJ/LCK/DKK3/FZD1/CDH2/TGFB3/FGFRL1/GFRA4/RGMA/EFNB1/SPRY2/NPPA/ZYX/LRP1/RBPMS2/CHRNG/BCL2L10/ITGAV/GLG1/FZD2/NTRK3/FYN/DRAXIN/GATA3/FGFR1/JAK2/NKX2-5/NFKBIA/EGFR/ISL1/EPHA5/EYA3/NKIRAS2/LY86/CNOT7/CHRNB2/FGFR2/UBAC2/FGFR3/GFRA2/MYO1G/HDAC1/CHRND/INHBA/STK11/BMPR1B/GSKIP/NTRK2/FOS/TSPAN12/FLRT3/FST/SIX3/WDR48/ITGA1/FZD3/MVB12A/SH2D6/CHUK/WNT9A/LFNG/ADORA2B/CHRNA…	BP
GO:0070482	response to oxygen levels	18	0.696454	2.0154	0.000129086	0.0384676	0.0316601	1638	tags=50%, list=13%, signal=43%	FOSL2/FZD4/VEGFA/HYOU1/TGFB3/CHRNB2/PCK1/MMP2/SUV39H2	BP
GO:0001666	response to hypoxia	17	0.700825	1.99869	0.00023778	0.0412649	0.0339622	1638	tags=53%, list=13%, signal=46%	FOSL2/FZD4/VEGFA/HYOU1/TGFB3/CHRNB2/PCK1/MMP2/SUV39H2	BP
GO:0036293	response to decreased oxygen levels	17	0.700825	1.99869	0.00023778	0.0412649	0.0339622	1638	tags=53%, list=13%, signal=46%	FOSL2/FZD4/VEGFA/HYOU1/TGFB3/CHRNB2/PCK1/MMP2/SUV39H2	BP
GO:0030154	cell differentiation	328	0.318257	1.52087	0.000348106	0.0412649	0.0339622	2876	tags=32%, list=23%, signal=25%	FOSL2/SOX11/FZD4/DPYSL2/VEGFA/WWOX/NRP1/TBPL1/GAP43/PCK2/TNNT2/LCK/CDH2/TNNT3/TGFB3/SOX8/GATA4/IRF8/MYH9/HHEX/EFNB1/NR2F2/SOX2/DISP3/RBPMS2/MARF1/TOP2B/NFASC/LPL/GLG1/FOXD1/NTRK3/BSG/FYN/TESC/FAM206A/DRAXIN/GATA3/TBX3/FGFR1/MAFB/JAK2/NKX2-5/PRKAR1A/ISL1/EPHA5/EYA3/YIPF3/BCL6/GGNBP2/VCAN/GATA5/SPP1/CDH5/MUSTN1/ADCYAP1/GATA2/UBA5/CAPN3/MAPK4/HDAC1/PCK1/MMP2/SUV39H2/INHBA/TENM2/BMPR1B/STMN2/ALDH1A2/…	BP
GO:0048869	cellular developmental process	328	0.318257	1.52087	0.000348106	0.0412649	0.0339622	2876	tags=32%, list=23%, signal=25%	FOSL2/SOX11/FZD4/DPYSL2/VEGFA/WWOX/NRP1/TBPL1/GAP43/PCK2/TNNT2/LCK/CDH2/TNNT3/TGFB3/SOX8/GATA4/IRF8/MYH9/HHEX/EFNB1/NR2F2/SOX2/DISP3/RBPMS2/MARF1/TOP2B/NFASC/LPL/GLG1/FOXD1/NTRK3/BSG/FYN/TESC/FAM206A/DRAXIN/GATA3/TBX3/FGFR1/MAFB/JAK2/NKX2-5/PRKAR1A/ISL1/EPHA5/EYA3/YIPF3/BCL6/GGNBP2/VCAN/GATA5/SPP1/CDH5/MUSTN1/ADCYAP1/GATA2/UBA5/CAPN3/MAPK4/HDAC1/PCK1/MMP2/SUV39H2/INHBA/TENM2/BMPR1B/STMN2/ALDH1A2/…	BP
GO:0048646	anatomical structure formation involved in morphogenesis	100	0.423321	1.75254	0.00036926	0.0412649	0.0339622	2942	tags=39%, list=24%, signal=30%	ATP5B/FZD4/VEGFA/NRP1/TBPL1/PCK2/TNNT2/CDH2/TNNT3/TGFB3/MYH9/SOX2/ITGAV/BSG/GATA3/NKX2-5/PRKAR1A/ISL1/C2orf49/HPSE/NRXN1/GATA2/CAPN3/HDAC1/PCK1/MMP2/MYL6/TSPAN12/ETS1/PROX1/FST/CTNNA2/LFNG/MYL9/ACHE/TGFB2/AGTR1/NTN3/IL8L2	BP
GO:0006936	muscle contraction	27	0.601084	1.92228	0.000621626	0.0495544	0.0407848	1862	tags=41%, list=15%, signal=35%	TNNT2/TNNT3/MYBPC3/TPM2/NMU/NKX2-5/CACNA1C/CHRM2/TNNI2/MYH1E/MYL2	BP
GO:0050896	response to stimulus	638	0.277504	1.39019	0.000637104	0.0495544	0.0407848	2883	tags=30%, list=23%, signal=24%	FOSL2/SOX11/FZD4/VEGFA/WWOX/NRP1/PTPRJ/GAP43/PCK2/XPA/TF/LCK/DKK3/FZD1/CDH2/HYOU1/SMC5/REV1/TGFB3/GATA4/IRF8/CCN3/AVP/GLDC/FTH1/FGFRL1/GFRA4/RGMA/EFNB1/ACAP2/SPRY2/NR2F2/NPPA/ZYX/DISP3/ALB/GNAI1/LRP1/GSTA2/RBPMS2/CHRNG/AvBD12/BCL2L10/ITGAV/LPL/GLG1/USP28/FZD2/CENPX/RMI2/NTRK3/BSG/FYN/SOCS3/SELENOT/UBE2V2/NFKB1/TESC/ATP2A2/DRAXIN/FASN/GATA3/TBX3/FGFR1/NCLN/JAK2/NMU/NKX2-5/PRKAR1A/NFKBIA/EGFR/ISL1/…	BP
GO:0060070	canonical Wnt signaling pathway	34	0.561974	1.89641	0.000656725	0.0495544	0.0407848	1850	tags=44%, list=15%, signal=38%	SOX11/FZD4/DKK3/FZD1/CDH2/LRP1/FZD2/DRAXIN/GATA3/NKX2-5/ISL1/UBAC2/HDAC1/STK11/GSKIP	BP
GO:0032501	multicellular organismal process	482	0.291964	1.43718	0.000706287	0.0495544	0.0407848	2340	tags=26%, list=19%, signal=22%	ATP5B/FOSL2/SOX11/FZD4/DPYSL2/VEGFA/WWOX/NRP1/TBPL1/GAP43/PCK2/TNNT2/LCK/CDH2/TNNT3/REV1/TGFB3/SOX8/IRF8/MYH9/SUPT20H/GFRA4/EFNB1/PLN/MARCKS/NPPA/SOX2/DISP3/RBPMS2/MARF1/CHRNG/TOP2B/NFASC/ITGAV/LPL/GLG1/NTRK3/BSG/FYN/MYBPC3/TPM2/TESC/FAM206A/DRAXIN/MBP/GATA3/TBX3/FGFR1/MAFB/JAK2/NMU/NKX2-5/PRKAR1A/EGFR/ISL1/EPHA5/NKIRAS2/CHRNB2/FGFR2/PMS2/BCL6/CACNA1C/GGNBP2/VCAN/ALDOB/N4BP1/SPP1/OGN/CDH5/IBSP/CD…	BP
GO:0006812	monoatomic cation transport	70	0.454928	1.77515	0.000801389	0.0495544	0.0407848	2041	tags=31%, list=17%, signal=26%	ATP5B/ATP1A1/TF/FTH1/KCNMA1/PLN/ATP2B1/TESC/ATP2A2/NKX2-5/ASIC1/CACNA1C/TMEM175/ORAI3/ATP6V0A1/SCNN1A/SLC8B1/CAPN3/TFRC/VIP/SLC30A6/CALB1	BP
GO:0007411	axon guidance	33	0.558006	1.87039	0.000850873	0.0495544	0.0407848	940	tags=27%, list=8%, signal=25%	NRP1/GAP43/EFNB1/NFASC/BSG/DRAXIN/GATA3/ISL1/EPHA5	BP
GO:0097485	neuron projection guidance	33	0.558006	1.87039	0.000850873	0.0495544	0.0407848	940	tags=27%, list=8%, signal=25%	NRP1/GAP43/EFNB1/NFASC/BSG/DRAXIN/GATA3/ISL1/EPHA5	BP
GO:0042592	homeostatic process	110	0.39944	1.67885	0.000938704	0.0495544	0.0407848	2324	tags=35%, list=19%, signal=28%	FOSL2/PCK2/ATP1A1/TF/LCK/CDH2/FTH1/DISP3/RPS6/LPL/ATP2B1/SELENOT/ATP2A2/GATA3/JAK2/NKIRAS2/BCL6/CACNA1C/SURF4/TMEM175/RGN/ATP6V0A1/SPP1/SCNN1A/SLC8B1/HSP90B1/UBA5/CAPN3/PCK1/TFRC/INHBA/STK11/PM20D1/CALB1/CCNB1/WDR48/CHD7/SLC25A46	BP
GO:0033993	response to lipid	44	0.513889	1.83318	0.000999703	0.0495544	0.0407848	1859	tags=36%, list=15%, signal=31%	FOSL2/PCK2/TF/TGFB3/GATA4/IRF8/GLDC/ALB/GNAI1/TESC/LY86/SPINK5/HDAC1/PCK1/ESR2/ALDH1A2	BP
GO:0007169	transmembrane receptor protein tyrosine kinase signaling pathway	59	0.467706	1.76918	0.00110432	0.0495544	0.0407848	2340	tags=41%, list=19%, signal=33%	FZD4/VEGFA/NRP1/PTPRJ/LCK/FGFRL1/GFRA4/EFNB1/SPRY2/NTRK3/FYN/GATA3/FGFR1/JAK2/EGFR/EPHA5/FGFR2/FGFR3/GFRA2/NTRK2/FLRT3/ITGA1/MVB12A/SH2D6	BP
GO:0032502	developmental process	469	0.288826	1.41921	0.00110801	0.0495544	0.0407848	2795	tags=30%, list=23%, signal=24%	ATP5B/FOSL2/SOX11/FZD4/DPYSL2/VEGFA/WWOX/NRP1/TBPL1/GAP43/PCK2/LARGE1/TNNT2/LCK/CDH2/TNNT3/REV1/TGFB3/SOX8/GATA4/IRF8/MYH9/HHEX/SUPT20H/GFRA4/EFNB1/SPRY2/NR2F2/MARCKS/NPPA/SOX2/DISP3/RBPMS2/MARF1/TOP2B/NFASC/ITGAV/LPL/GLG1/FOXD1/NTRK3/BSG/FYN/SELENOT/TESC/FAM206A/DRAXIN/MBP/GATA3/TBX3/FGFR1/MAFB/JAK2/NKX2-5/PRKAR1A/ISL1/EPHA5/EYA3/FGFR2/YIPF3/PMS2/BCL6/GGNBP2/VCAN/GATA5/ALDOB/SPP1/OGN/CDH5/IBSP/C…	BP
GO:0007167	enzyme-linked receptor protein signaling pathway	91	0.419003	1.70846	0.0011086	0.0495544	0.0407848	2340	tags=37%, list=19%, signal=30%	FZD4/VEGFA/NRP1/PTPRJ/LCK/TGFB3/FGFRL1/GFRA4/RGMA/EFNB1/SPRY2/NPPA/ZYX/RBPMS2/GLG1/NTRK3/FYN/GATA3/FGFR1/JAK2/EGFR/EPHA5/FGFR2/FGFR3/GFRA2/INHBA/BMPR1B/NTRK2/FOS/FLRT3/FST/ITGA1/MVB12A/SH2D6	BP
GO:0046907	intracellular transport	122	-0.336452	-1.60915	0.001265	0.0524856	0.0431973	3106	tags=39%, list=25%, signal=29%	KDELR2/WDR91/RDX/PCM1/LEPROT/SEC31A/TRAPPC3/RHOT2/HSPA5/ATP6V0D2/RAB11A/BCL2L1/KLHL20/CHMP4B/RAN/YWHAB/GOLGA7/SEC16B/ZC3H11A/HSPD1/WLS/DCTN1/SCP2/AKTIP/NCBP1/SEC23B/HOOK1/TRAPPC2/NSG1/PDLIM7/NUP42/SPAST/VAMP7/VPS51/CHMP2A/LMNB2/STRADA/CHP1/KIF1BP/PEX5/PAFAH1B1/TBC1D23/ARCN1/SPCS3/RAB5B/KPNA1/LSG1	BP
GO:0006811	monoatomic ion transport	88	0.415796	1.68591	0.00138568	0.0524856	0.0431973	2041	tags=30%, list=17%, signal=25%	ATP5B/ATP1A1/TF/FTH1/KCNMA1/PLN/CHRNG/ATP2B1/TESC/ATP2A2/NKX2-5/ASIC1/CHRNB2/CACNA1C/TMEM175/ORAI3/ATP6V0A1/SCNN1A/SLC8B1/CAPN3/TFRC/CHRND/NTRK2/VIP/SLC30A6/CALB1	BP
GO:0048878	chemical homeostasis	77	0.430411	1.70757	0.00142187	0.0524856	0.0431973	1761	tags=32%, list=14%, signal=28%	FOSL2/PCK2/ATP1A1/TF/LCK/FTH1/DISP3/RPS6/LPL/ATP2B1/SELENOT/ATP2A2/NKIRAS2/CACNA1C/SURF4/TMEM175/RGN/ATP6V0A1/SCNN1A/SLC8B1/HSP90B1/CAPN3/PCK1/TFRC/STK11	BP
GO:0002768	immune response-regulating cell surface receptor signaling pathway	15	0.682478	1.88064	0.00142492	0.0524856	0.0431973	1560	tags=40%, list=13%, signal=35%	FOSL2/PTPRJ/LCK/GATA3/NFKBIA/MYO1G	BP
GO:1903047	mitotic cell cycle process	64	-0.404716	-1.72095	0.00155931	0.0524856	0.0431973	2489	tags=34%, list=20%, signal=28%	CCNB3/CASP2/CHMP4B/MYC/ANAPC5/RAN/DCTN2/NDC80/FAM175A/DCTN1/NBN/PSME3/SPAST/CHMP2A/MASTL/MSH6/PAFAH1B1/NSFL1C/ENSA/RAD51/TIPIN/RB1	BP
GO:0098655	monoatomic cation transmembrane transport	59	0.460235	1.74092	0.00161866	0.0524856	0.0431973	1565	tags=27%, list=13%, signal=24%	ATP5B/ATP1A1/TF/KCNMA1/PLN/ATP2B1/TESC/ATP2A2/ASIC1/CACNA1C/TMEM175/ORAI3/ATP6V0A1/SCNN1A/SLC8B1/CAPN3	BP
GO:0007049	cell cycle	167	-0.302019	-1.51386	0.00163359	0.0524856	0.0431973	2669	tags=37%, list=22%, signal=29%	SOX9/RAB11A/BTG1/MAEA/CCNB3/BCL2L1/CASP2/TUBA1A/BRIP1/MYBL2/HACE1/CHMP4B/MYC/ANAPC5/RAN/BIRC2/CENPT/PPP2CB/TOP2A/EPB41/KIZ/DCTN2/TUBB3/CSNK1A1/NDC80/UFL1/CHORDC1/PUM1/FAM175A/CHAF1A/DCTN1/JUND/SPIN1/APOA1/NBN/TUBB1/CDK9/TRIP13/DNA2/PSME3/TUBB4B/SPAST/MDM1/CHMP2A/ASNS/HSP90AB1/CENPN/RPA1/MASTL/STRADA/TERF2/CSNK2A1/MSH6/TUB4A/PAFAH1B1/NSFL1C/FEN1/ENSA/RAD51/TIPIN/RB1	BP
GO:0042221	response to chemical	206	0.33413	1.52408	0.0017728	0.0524856	0.0431973	2883	tags=35%, list=23%, signal=28%	FOSL2/FZD4/VEGFA/PCK2/TF/LCK/HYOU1/TGFB3/GATA4/IRF8/GLDC/DISP3/ALB/GNAI1/GSTA2/LPL/BSG/SELENOT/NFKB1/TESC/ATP2A2/FASN/GATA3/JAK2/PRKAR1A/NFKBIA/REL/NKIRAS2/LY86/CNOT7/CHRNB2/SOD1/LAMTOR3/HSF2/SPINK5/SLC8B1/CHRM2/HSP90B1/CAPN3/HDAC1/PCK1/CYP1A2/MAFA/MMP2/SUV39H2/ESR2/NFKB2/STK11/AvBD9/ALDH1A2/FOS/THRB/FLRT3/HBZ/CHD7/DHFR/CHUK/CYP2C23a/STUB1/MYOD1/PTGS2/CHRNA4/PKLR/P2RY6/IGF2/PTPN1/HBA1/TGFB2/THRA/…	BP
GO:0016055	Wnt signaling pathway	49	0.481182	1.75587	0.00188533	0.0524856	0.0431973	2776	tags=43%, list=23%, signal=33%	SOX11/FZD4/WWOX/DKK3/FZD1/CDH2/LRP1/FZD2/DRAXIN/GATA3/NKX2-5/ISL1/UBAC2/HDAC1/STK11/GSKIP/SIX3/FZD3/WNT9A/FRZB/SMAD6	BP
GO:0198738	cell-cell signaling by wnt	49	0.481182	1.75587	0.00188533	0.0524856	0.0431973	2776	tags=43%, list=23%, signal=33%	SOX11/FZD4/WWOX/DKK3/FZD1/CDH2/LRP1/FZD2/DRAXIN/GATA3/NKX2-5/ISL1/UBAC2/HDAC1/STK11/GSKIP/SIX3/FZD3/WNT9A/FRZB/SMAD6	BP
GO:0030097	hemopoiesis	48	0.48394	1.75857	0.00188822	0.0524856	0.0431973	3043	tags=50%, list=25%, signal=38%	FOSL2/LCK/IRF8/MYH9/TOP2B/TESC/GATA3/MAFB/JAK2/NKX2-5/BCL6/UBA5/PCK1/INHBA/FOS/CHD7/SH2D6/CDIN1/LFNG/TGFB2/THRA/CD3E/IL8L2/LBR	BP
GO:0045184	establishment of protein localization	117	-0.331864	-1.57624	0.00188995	0.0524856	0.0431973	1832	tags=27%, list=15%, signal=24%	YWHAB/GOLGA7/EXOC8/AACS/SEC16B/P3H1/RAB33B/HSPD1/WLS/DCTN1/AKTIP/SEC23B/HOOK1/NSG1/NUP42/CTSD/VAMP7/VPS51/CHMP2A/STRADA/CHP1/PEX5/PAFAH1B1/ARCN1/SPCS3/ENSA/RAB5B/KPNA1/GET4/ACTN4/LSG1/PRNP	BP
GO:0072359	circulatory system development	91	0.406062	1.65569	0.00198684	0.0524856	0.0431973	2247	tags=33%, list=18%, signal=27%	ATP5B/FZD4/VEGFA/NRP1/CDH2/TGFB3/SOX8/MYH9/ITGAV/NTRK3/BSG/GATA3/NKX2-5/PRKAR1A/ISL1/CDH5/HPSE/NRXN1/GATA2/MMP2/STK11/ALDH1A2/MYL2/TSPAN12/ETS1/IRX4/FLRT3/PROX1/CCNB1/CHD7	BP
GO:0098662	inorganic cation transmembrane transport	60	0.453535	1.72039	0.00201004	0.0524856	0.0431973	1565	tags=27%, list=13%, signal=23%	ATP5B/ATP1A1/TF/KCNMA1/PLN/ATP2B1/TESC/ATP2A2/ASIC1/CACNA1C/TMEM175/ORAI3/ATP6V0A1/SCNN1A/SLC8B1/CAPN3	BP
GO:0001944	vasculature development	55	0.464581	1.73435	0.00213535	0.0524856	0.0431973	2247	tags=36%, list=18%, signal=30%	ATP5B/FZD4/VEGFA/NRP1/CDH2/MYH9/ITGAV/BSG/NKX2-5/ISL1/CDH5/HPSE/NRXN1/GATA2/MMP2/STK11/TSPAN12/ETS1/PROX1/CHD7	BP
GO:0048856	anatomical structure development	434	0.286775	1.4013	0.00216982	0.0524856	0.0431973	2247	tags=25%, list=18%, signal=21%	ATP5B/FOSL2/SOX11/FZD4/DPYSL2/VEGFA/WWOX/NRP1/TBPL1/GAP43/PCK2/LARGE1/TNNT2/LCK/CDH2/TNNT3/REV1/TGFB3/SOX8/IRF8/MYH9/SUPT20H/GFRA4/EFNB1/SPRY2/NR2F2/MARCKS/NPPA/SOX2/DISP3/RBPMS2/MARF1/TOP2B/NFASC/ITGAV/LPL/GLG1/FOXD1/NTRK3/BSG/FYN/SELENOT/TESC/FAM206A/DRAXIN/MBP/GATA3/TBX3/FGFR1/MAFB/JAK2/NKX2-5/PRKAR1A/ISL1/EPHA5/EYA3/FGFR2/PMS2/BCL6/VCAN/ALDOB/SPP1/OGN/CDH5/IBSP/CDH20/MUSTN1/ADCYAP1/FGFR3/C2or…	BP
GO:0070848	response to growth factor	60	0.451039	1.71092	0.0022065	0.0524856	0.0431973	1027	tags=30%, list=8%, signal=28%	FZD4/VEGFA/WWOX/NRP1/TGFB3/FGFRL1/RGMA/ACAP2/SPRY2/ZYX/RBPMS2/GLG1/NTRK3/GATA3/FGFR1/NKX2-5/EGFR/FGFR2	BP
GO:0009653	anatomical structure morphogenesis	234	0.321407	1.48671	0.00223093	0.0524856	0.0431973	2247	tags=26%, list=18%, signal=22%	ATP5B/FOSL2/SOX11/FZD4/VEGFA/WWOX/NRP1/TBPL1/GAP43/PCK2/TNNT2/CDH2/TNNT3/TGFB3/SOX8/MYH9/SUPT20H/EFNB1/SOX2/RBPMS2/NFASC/ITGAV/GLG1/FOXD1/BSG/FYN/FAM206A/DRAXIN/GATA3/TBX3/NKX2-5/PRKAR1A/ISL1/EPHA5/BCL6/CDH5/CDH20/C2orf49/HPSE/NRXN1/GATA2/CAPN3/HDAC1/PCK1/MMP2/UGDH/TENM2/BMPR1B/ALDH1A2/NTRK2/YBX1/MYL6/TSPAN12/ETS1/FLRT3/PROX1/FST/CCNB1/SIX3/WDR48/CHD7	BP
GO:0002376	immune system process	140	0.360436	1.56776	0.00235999	0.0529727	0.0435981	2795	tags=36%, list=23%, signal=28%	FOSL2/VEGFA/PTPRJ/TF/LCK/REV1/TGFB3/IRF8/FTH1/AvBD12/TOP2B/BSG/FYN/NFKB1/TESC/GATA3/MAFB/JAK2/NKX2-5/PRKAR1A/NFKBIA/REL/LY86/CNOT7/PMS2/BCL6/BF2/N4BP1/AvBD10/SLC8B1/UBA5/MYO1G/PCK1/TFRC/INHBA/NFKB2/FOS/RIF1/CCNB1/CHD7/SH2D6/CHUK/TOLLIP/CDIN1/LFNG/ADORA2B/YES1/IGF2/COLEC11/TGFB2/THRA	BP
GO:0010256	endomembrane system organization	51	-0.425287	-1.72267	0.00237014	0.0529727	0.0435981	1649	tags=45%, list=13%, signal=39%	YWHAZ/SEC31A/RAB2A/PI4K2B/HACE1/CHMP4B/SEC16B/CAV1/TMEM41B/RAB33B/DEGS1/AKTIP/HOOK1/ZFYVE27/SPAST/VPS51/CHMP2A/LMNB2/LYSMD3/TLCD1/PAFAH1B1/NSFL1C/GET4	BP
GO:0071363	cellular response to growth factor stimulus	58	0.45365	1.71086	0.00251565	0.0541372	0.0445566	1982	tags=38%, list=16%, signal=32%	FZD4/VEGFA/WWOX/NRP1/TGFB3/FGFRL1/RGMA/ACAP2/SPRY2/ZYX/RBPMS2/GLG1/NTRK3/GATA3/FGFR1/EGFR/FGFR2/FGFR3/BMPR1B/STMN2/NTRK2/FOS	BP
GO:0030001	metal ion transport	61	0.445244	1.69452	0.0025489	0.0541372	0.0445566	2247	tags=34%, list=18%, signal=28%	ATP1A1/TF/FTH1/KCNMA1/PLN/ATP2B1/TESC/ATP2A2/NKX2-5/ASIC1/CACNA1C/TMEM175/ORAI3/SCNN1A/SLC8B1/CAPN3/TFRC/VIP/SLC30A6/CALB1/CHD7	BP
GO:0030178	negative regulation of Wnt signaling pathway	18	0.634149	1.8351	0.0026107	0.0541372	0.0445566	3030	tags=72%, list=25%, signal=55%	WWOX/DKK3/CDH2/DRAXIN/NKX2-5/ISL1/UBAC2/HDAC1/STK11/SIX3/FRZB/SMAD6/LZIC	BP
GO:0007155	cell adhesion	118	0.373831	1.58684	0.00272415	0.0541372	0.0445566	1626	tags=26%, list=13%, signal=23%	FZD4/VEGFA/NRP1/PTPRJ/LCK/CDH2/NTM/CCN3/ZYX/NFASC/ITGAV/BSG/MYBPC3/TESC/GATA3/PRKAR1A/CNTN5/EPCAM/BCL6/PLAU/VCAN/SPP1/CDH5/IBSP/CDH20/LAMB2/HPSE/NRXN1/PCK1/TFRC/MMP2	BP
GO:0003008	system process	97	0.391634	1.61364	0.00280835	0.0541372	0.0445566	2842	tags=37%, list=23%, signal=29%	FZD4/VEGFA/TNNT2/TNNT3/PLN/NPPA/CHRNG/MYBPC3/TPM2/GATA3/TBX3/NMU/NKX2-5/EGFR/ISL1/CHRNB2/CACNA1C/CHRM2/TNNI2/GJB6/PCK1/CHRND/INHBA/MYH1E/MYL2/NTRK2/VIP/CALB1/CHD7/PTGS2/ADORA2B/CHRNA4/GABRQ/TGFB2/THRA/AGTR1	BP
GO:0044770	cell cycle phase transition	45	-0.44137	-1.73854	0.00285052	0.0541372	0.0445566	2489	tags=42%, list=20%, signal=34%	CCNB3/CASP2/CHMP4B/MYC/ANAPC5/NDC80/UFL1/FAM175A/NBN/TRIP13/DNA2/PSME3/SPAST/CHMP2A/MASTL/MSH6/ENSA/TIPIN/RB1	BP
GO:0003013	circulatory system process	31	0.536721	1.77246	0.0029067	0.0541372	0.0445566	2842	tags=52%, list=23%, signal=40%	VEGFA/TNNT2/PLN/NPPA/NKX2-5/ISL1/CACNA1C/CHRM2/TNNI2/MYL2/CHD7/PTGS2/ADORA2B/TGFB2/THRA/AGTR1	BP
GO:0008015	blood circulation	31	0.536721	1.77246	0.0029067	0.0541372	0.0445566	2842	tags=52%, list=23%, signal=40%	VEGFA/TNNT2/PLN/NPPA/NKX2-5/ISL1/CACNA1C/CHRM2/TNNI2/MYL2/CHD7/PTGS2/ADORA2B/TGFB2/THRA/AGTR1	BP
GO:0032392	DNA geometric change	17	-0.610069	-1.86978	0.00311254	0.0550585	0.0453148	2317	tags=59%, list=19%, signal=48%	BRIP1/TOP2A/XRCC6/DDX1/NBN/MCM8/DNA2/HMGB2/SUPV3L1/RAD51	BP
GO:0033036	macromolecule localization	220	-0.272652	-1.41834	0.00316854	0.0550585	0.0453148	1914	tags=26%, list=16%, signal=22%	EPB41/TMEM30A/YWHAB/GOLGA7/EXOC8/VCL/AACS/SEC16B/P3H1/TMEM41B/ZC3H11A/RAB33B/HSPD1/CETP/WLS/PGRMC1/DCTN1/SCP2/APOA1/AKTIP/NCBP1/WIPI2/SEC23B/HOOK1/CDK9/TWF2/ANKRD52/PDZD11/NSG1/ZFYVE27/PDLIM7/NUP42/CTSD/VLDLR/VAMP7/VPS51/CHMP2A/LMNB2/RPA1/STRADA/TERF2/CHP1/QKI/PEX5/PAFAH1B1/EXFABP/PRELID1/ARCN1/NSFL1C/SPCS3/ENSA/RAB5B/KPNA1/GET4/ACTN4/LSG1/PRNP	BP
GO:0098771	inorganic ion homeostasis	41	0.492623	1.73186	0.00323813	0.0550585	0.0453148	2247	tags=37%, list=18%, signal=30%	ATP1A1/TF/LCK/FTH1/ATP2B1/ATP2A2/CACNA1C/RGN/SCNN1A/SLC8B1/HSP90B1/CAPN3/TFRC/CALB1/CHD7	BP
GO:0008104	protein localization	182	-0.287174	-1.45782	0.00326409	0.0550585	0.0453148	2754	tags=34%, list=22%, signal=26%	SEC31A/HSPA5/SOX9/SUMO3/TGFBR2/RAB11A/RAB2A/ATG7/FAM65B/BCL2L1/ABHD17B/ATG4B/KLHL20/CHMP4B/RAN/EPB41/YWHAB/GOLGA7/EXOC8/VCL/AACS/SEC16B/P3H1/RAB33B/HSPD1/WLS/PGRMC1/DCTN1/AKTIP/WIPI2/SEC23B/HOOK1/CDK9/TWF2/ANKRD52/PDZD11/NSG1/ZFYVE27/PDLIM7/NUP42/CTSD/VAMP7/VPS51/CHMP2A/LMNB2/RPA1/STRADA/TERF2/CHP1/PEX5/PAFAH1B1/ARCN1/NSFL1C/SPCS3/ENSA/RAB5B/KPNA1/GET4/ACTN4/LSG1/PRNP	BP
GO:0070727	cellular macromolecule localization	182	-0.287174	-1.45782	0.00326409	0.0550585	0.0453148	2754	tags=34%, list=22%, signal=26%	SEC31A/HSPA5/SOX9/SUMO3/TGFBR2/RAB11A/RAB2A/ATG7/FAM65B/BCL2L1/ABHD17B/ATG4B/KLHL20/CHMP4B/RAN/EPB41/YWHAB/GOLGA7/EXOC8/VCL/AACS/SEC16B/P3H1/RAB33B/HSPD1/WLS/PGRMC1/DCTN1/AKTIP/WIPI2/SEC23B/HOOK1/CDK9/TWF2/ANKRD52/PDZD11/NSG1/ZFYVE27/PDLIM7/NUP42/CTSD/VAMP7/VPS51/CHMP2A/LMNB2/RPA1/STRADA/TERF2/CHP1/PEX5/PAFAH1B1/ARCN1/NSFL1C/SPCS3/ENSA/RAB5B/KPNA1/GET4/ACTN4/LSG1/PRNP	BP
GO:0061024	membrane organization	59	-0.3958	-1.65475	0.00354003	0.0567995	0.0467477	2754	tags=42%, list=22%, signal=33%	SEC31A/RHOT2/SH3GLB1/BCL2L1/HACE1/CHMP4B/TMEM30A/SEC16B/CAV1/TMEM41B/DEGS1/CETP/APOA1/SEC23B/SPAST/VAMP7/CHMP2A/LMNB2/CHP1/TLCD1/PAFAH1B1/PRELID1/NSFL1C/GET4/PRNP	BP
GO:0071900	regulation of protein serine/threonine kinase activity	18	0.623206	1.80343	0.00369567	0.0567995	0.0467477	833	tags=28%, list=7%, signal=26%	FZD4/PTPRJ/PKIA/SPRY2/FGFR1	BP
GO:0051716	cellular response to stimulus	558	0.270053	1.34181	0.00370759	0.0567995	0.0467477	2883	tags=30%, list=23%, signal=24%	FOSL2/SOX11/FZD4/VEGFA/WWOX/NRP1/PTPRJ/GAP43/PCK2/XPA/LCK/DKK3/FZD1/CDH2/HYOU1/SMC5/REV1/TGFB3/IRF8/CCN3/AVP/FGFRL1/GFRA4/RGMA/EFNB1/SPRY2/NR2F2/NPPA/ZYX/ALB/GNAI1/LRP1/GSTA2/RBPMS2/CHRNG/BCL2L10/ITGAV/LPL/GLG1/USP28/FZD2/CENPX/RMI2/NTRK3/BSG/FYN/SOCS3/SELENOT/UBE2V2/NFKB1/TESC/DRAXIN/GATA3/TBX3/FGFR1/NCLN/JAK2/NMU/NKX2-5/PRKAR1A/NFKBIA/EGFR/ISL1/INIP/REL/ASIC1/EPHA5/EYA3/NKIRAS2/LY86/CNOT7/CHRNB…	BP
GO:0051649	establishment of localization in cell	151	-0.298791	-1.47678	0.0038223	0.0567995	0.0467477	1832	tags=25%, list=15%, signal=21%	YWHAB/RAP1B/GOLGA7/NDC80/SEC16B/FAM175A/ZC3H11A/HSPD1/WLS/DCTN1/SCP2/AKTIP/NCBP1/SEC23B/HOOK1/TRAPPC2/PDZD11/NSG1/PDLIM7/NUP42/SPAST/VAMP7/VPS51/CHMP2A/LMNB2/STRADA/CHP1/KIF1BP/PEX5/PAFAH1B1/TBC1D23/ARCN1/NSFL1C/SPCS3/RAB5B/KPNA1/LSG1	BP
GO:0055082	intracellular chemical homeostasis	56	0.446261	1.67203	0.00390762	0.0567995	0.0467477	1605	tags=30%, list=13%, signal=27%	PCK2/ATP1A1/TF/LCK/FTH1/ATP2B1/SELENOT/ATP2A2/CACNA1C/TMEM175/RGN/ATP6V0A1/SLC8B1/HSP90B1/CAPN3/PCK1/TFRC	BP
GO:0006914	autophagy	42	-0.442063	-1.71343	0.00392309	0.0567995	0.0467477	2541	tags=40%, list=21%, signal=32%	ATG7/ACBD5/ATG4B/TECPR1/USP13/UFL1/SEC16B/WDR24/TMEM41B/RAB33B/PHB2/YOD1/WIPI2/CTSD/PEX5/NSFL1C/SPATA18	BP
GO:0061919	process utilizing autophagic mechanism	42	-0.442063	-1.71343	0.00392309	0.0567995	0.0467477	2541	tags=40%, list=21%, signal=32%	ATG7/ACBD5/ATG4B/TECPR1/USP13/UFL1/SEC16B/WDR24/TMEM41B/RAB33B/PHB2/YOD1/WIPI2/CTSD/PEX5/NSFL1C/SPATA18	BP
GO:0003012	muscle system process	31	0.528552	1.74549	0.00392404	0.0567995	0.0467477	1862	tags=35%, list=15%, signal=30%	TNNT2/TNNT3/MYBPC3/TPM2/NMU/NKX2-5/CACNA1C/CHRM2/TNNI2/MYH1E/MYL2	BP
GO:0007275	multicellular organism development	351	0.290437	1.39561	0.00393912	0.0567995	0.0467477	2247	tags=25%, list=18%, signal=21%	ATP5B/FOSL2/SOX11/FZD4/DPYSL2/VEGFA/WWOX/NRP1/GAP43/PCK2/CDH2/REV1/TGFB3/SOX8/MYH9/SUPT20H/GFRA4/EFNB1/MARCKS/NPPA/SOX2/DISP3/RBPMS2/NFASC/ITGAV/GLG1/NTRK3/BSG/FYN/TESC/FAM206A/DRAXIN/MBP/GATA3/TBX3/FGFR1/MAFB/NKX2-5/PRKAR1A/ISL1/EPHA5/FGFR2/PMS2/BCL6/VCAN/ALDOB/OGN/CDH5/CDH20/MUSTN1/ADCYAP1/FGFR3/C2orf49/HPSE/GFRA2/NRXN1/GATA2/CAPN3/MAPK4/HDAC1/PCK1/TFRC/MMP2/INHBA/STK11/UGDH/TENM2/BMPR1B/STMN2/…	BP
GO:0044772	mitotic cell cycle phase transition	35	-0.467586	-1.73668	0.00406156	0.0568352	0.0467771	2489	tags=43%, list=20%, signal=34%	CCNB3/CASP2/CHMP4B/MYC/ANAPC5/NDC80/FAM175A/NBN/PSME3/SPAST/CHMP2A/MASTL/MSH6/ENSA/RB1	BP
GO:1903706	regulation of hemopoiesis	15	0.651764	1.79601	0.00406874	0.0568352	0.0467771	1982	tags=47%, list=16%, signal=39%	TESC/GATA3/MAFB/BCL6/PCK1/INHBA/FOS	BP
GO:0034220	monoatomic ion transmembrane transport	76	0.410195	1.62335	0.00416881	0.0573371	0.0471902	1999	tags=28%, list=16%, signal=23%	ATP5B/ATP1A1/TF/KCNMA1/PLN/CHRNG/ATP2B1/TESC/ATP2A2/ASIC1/CHRNB2/CACNA1C/TMEM175/ORAI3/ATP6V0A1/SCNN1A/SLC8B1/CAPN3/CHRND/NTRK2/SLC30A6	BP
GO:0001525	angiogenesis	40	0.489284	1.71107	0.00433569	0.0582801	0.0479663	2142	tags=32%, list=17%, signal=27%	ATP5B/FZD4/VEGFA/NRP1/MYH9/ITGAV/BSG/ISL1/HPSE/NRXN1/GATA2/TSPAN12/ETS1	BP
GO:0006955	immune response	84	0.397233	1.59828	0.00437271	0.0582801	0.0479663	1703	tags=29%, list=14%, signal=25%	FOSL2/PTPRJ/TF/LCK/TGFB3/IRF8/FTH1/AvBD12/FYN/NFKB1/GATA3/NFKBIA/REL/LY86/CNOT7/PMS2/BCL6/BF2/N4BP1/AvBD10/MYO1G/PCK1/TFRC/NFKB2	BP
GO:0006396	RNA processing	94	-0.338771	-1.55044	0.00448893	0.0582801	0.0479663	2610	tags=33%, list=21%, signal=26%	DCAF13/INTS10/DKC1/FTSJ3/RPL7A/NOL11/C1D/DDX1/XRN2/PUM1/METTL16/UTP15/INTS9/VWA9/NCBP1/ZRANB2/TARDBP/TFIP11/PRKRIP1/TDRD3/KHDC4/MBNL1/RPL35/SMU1/RBM24/TRMU/INTS2/QKI/STRAP/SUPV3L1/SRSF2	BP
GO:0007267	cell-cell signaling	119	0.364439	1.54869	0.00449813	0.0582801	0.0479663	2776	tags=35%, list=23%, signal=28%	SOX11/FZD4/WWOX/DKK3/FZD1/CDH2/GNAI1/LRP1/CHRNG/ITGAV/FZD2/SELENOT/DRAXIN/GATA3/TBX3/NKX2-5/PRKAR1A/ISL1/CHRNB2/UBAC2/ADCYAP1/CHRM2/GJB6/HDAC1/MAFA/CHRND/INHBA/STK11/GSKIP/NTRK2/VIP/CALB1/FST/SIX3/CHD7/FZD3/WNT9A/ADORA2B/CHRNA4/GABRQ/FRZB/SMAD6	BP
GO:0050801	monoatomic ion homeostasis	50	0.456534	1.67246	0.00474971	0.0598063	0.0492224	1605	tags=30%, list=13%, signal=26%	ATP1A1/TF/LCK/FTH1/ATP2B1/ATP2A2/CACNA1C/TMEM175/RGN/ATP6V0A1/SCNN1A/SLC8B1/HSP90B1/CAPN3/TFRC	BP
GO:0055080	monoatomic cation homeostasis	50	0.456534	1.67246	0.00474971	0.0598063	0.0492224	1605	tags=30%, list=13%, signal=26%	ATP1A1/TF/LCK/FTH1/ATP2B1/ATP2A2/CACNA1C/TMEM175/RGN/ATP6V0A1/SCNN1A/SLC8B1/HSP90B1/CAPN3/TFRC	BP
GO:1903131	mononuclear cell differentiation	20	0.594996	1.76784	0.00488526	0.0606586	0.0499239	2876	tags=60%, list=23%, signal=46%	FOSL2/LCK/IRF8/MYH9/TOP2B/GATA3/BCL6/PCK1/CHD7/SH2D6/LFNG/CD3E	BP
GO:0055085	transmembrane transport	99	0.377748	1.56148	0.00500583	0.0607406	0.0499914	1999	tags=24%, list=16%, signal=20%	ATP5B/ATP1A1/TF/KCNMA1/PLN/CHRNG/SLC2A2/ATP2B1/TESC/ATP2A2/SLC25A36/ASIC1/CHRNB2/CACNA1C/TMEM175/ORAI3/ATP6V0A1/SCNN1A/SLC8B1/CAPN3/GJB6/CHRND/NTRK2/SLC30A6	BP
GO:0051726	regulation of cell cycle	70	-0.367732	-1.59183	0.00502774	0.0607406	0.0499914	2669	tags=44%, list=22%, signal=35%	SOX9/BTG1/CCNB3/BCL2L1/CASP2/MYC/ANAPC5/BIRC2/NDC80/UFL1/CHORDC1/PUM1/FAM175A/DCTN1/JUND/APOA1/NBN/CDK9/TRIP13/DNA2/PSME3/SPAST/MDM1/ASNS/HSP90AB1/CSNK2A1/MSH6/NSFL1C/FEN1/TIPIN/RB1	BP
GO:0044282	small molecule catabolic process	21	0.583979	1.75585	0.00513138	0.061166	0.0503415	2484	tags=57%, list=20%, signal=46%	PCK2/GLDC/AMT/ALDOB/ECHDC1/ACAD11/HAGHL/HMGCL/PCK1/HIBCH/GCSH/NPL	BP
GO:0048468	cell development	195	0.323036	1.46424	0.00532121	0.0625943	0.051517	2973	tags=34%, list=24%, signal=26%	FOSL2/FZD4/NRP1/TBPL1/GAP43/PCK2/TNNT2/LCK/CDH2/TNNT3/SOX8/IRF8/MYH9/EFNB1/MARF1/TOP2B/NFASC/NTRK3/BSG/TESC/FAM206A/DRAXIN/GATA3/MAFB/JAK2/NKX2-5/PRKAR1A/ISL1/EPHA5/BCL6/VCAN/ADCYAP1/UBA5/CAPN3/MAPK4/HDAC1/PCK1/INHBA/TENM2/BMPR1B/STMN2/NTRK2/FOS/MYL6/STMN3/IRX4/FLRT3/PROX1/FST/SIX3/CHD7/SLC25A46/SH2D6/LLPH/MYOD1/CTNNA2/CDIN1/LFNG/MYL9/FRZB/SMAD6/TGFB2/THRA/NTN3/CD3E/IL8L2/FAM172A	BP
GO:0044281	small molecule metabolic process	150	0.341198	1.49719	0.00562425	0.0652998	0.0537437	2505	tags=33%, list=20%, signal=26%	ATP5B/TBPL1/PCK2/MOXD1/GLDC/NPPA/APOB/DISP3/XDH/LPL/GCH1/PGK2/ST3GAL1/FASN/ST6GAL1/ENO2/ASL/ENTPD8/MMADHC/LCAT/HSDL1/AMT/ADCY9/ADH1C/RGN/ALDOB/ECHDC1/HPGDS/ACAD11/SIRT5/HAGHL/HMGCL/ASNSD1/PCK1/ENTPD2/PGP/COQ5/UGDH/ALDH1A2/PM20D1/HIBCH/PRPS2/FDPS/DHFR/GCSH/ELOVL6/CYP2C23a/NPL/PTGS2	BP
GO:0030003	intracellular monoatomic cation homeostasis	47	0.457803	1.65654	0.00589339	0.0675473	0.0555935	1605	tags=30%, list=13%, signal=26%	ATP1A1/TF/LCK/FTH1/ATP2B1/ATP2A2/CACNA1C/TMEM175/RGN/ATP6V0A1/SLC8B1/HSP90B1/CAPN3/TFRC	BP
GO:0001568	blood vessel development	50	0.447724	1.64018	0.0064152	0.0725973	0.0597498	2247	tags=34%, list=18%, signal=28%	ATP5B/FZD4/VEGFA/NRP1/CDH2/MYH9/ITGAV/BSG/NKX2-5/ISL1/HPSE/NRXN1/GATA2/MMP2/TSPAN12/ETS1/CHD7	BP
GO:0032989	cellular component morphogenesis	80	0.392932	1.56932	0.00675311	0.075466	0.0621108	940	tags=21%, list=8%, signal=20%	FZD4/NRP1/TBPL1/GAP43/TNNT2/CDH2/TNNT3/EFNB1/NFASC/BSG/FAM206A/DRAXIN/GATA3/NKX2-5/PRKAR1A/ISL1/EPHA5	BP
GO:0008284	positive regulation of cell population proliferation	86	0.386647	1.56169	0.00701348	0.077408	0.0637092	1953	tags=33%, list=16%, signal=28%	FOSL2/FZD4/VEGFA/NRP1/TGFB3/DISP3/RBPMS2/RPS6/NTRK3/FGFR1/JAK2/NKX2-5/ISL1/CNOT7/FGFR2/PMS2/BCL6/VCAN/FGFR3/HDAC1/TFRC/MMP2/TENM2/STMN2/FAM60A/NTRK2/VIP/TSC22D1	BP
GO:0009719	response to endogenous stimulus	123	0.352241	1.5049	0.00728457	0.0784845	0.0645952	1982	tags=29%, list=16%, signal=25%	FOSL2/FZD4/VEGFA/WWOX/NRP1/PCK2/TGFB3/FGFRL1/RGMA/ACAP2/SPRY2/ZYX/DISP3/RBPMS2/LPL/GLG1/NTRK3/GATA3/FGFR1/JAK2/NKX2-5/PRKAR1A/EGFR/FGFR2/LAMTOR3/SPINK5/FGFR3/CHRM2/HDAC1/PCK1/MMP2/ESR2/BMPR1B/STMN2/NTRK2/FOS	BP
GO:0048731	system development	302	0.292002	1.38527	0.00728659	0.0784845	0.0645952	2324	tags=26%, list=19%, signal=21%	ATP5B/FOSL2/SOX11/FZD4/DPYSL2/VEGFA/WWOX/NRP1/GAP43/PCK2/CDH2/REV1/TGFB3/SOX8/MYH9/GFRA4/EFNB1/MARCKS/SOX2/DISP3/RBPMS2/NFASC/ITGAV/GLG1/NTRK3/BSG/FYN/FAM206A/DRAXIN/MBP/GATA3/TBX3/NKX2-5/PRKAR1A/ISL1/EPHA5/PMS2/BCL6/VCAN/ALDOB/OGN/CDH5/MUSTN1/ADCYAP1/HPSE/GFRA2/NRXN1/GATA2/MAPK4/HDAC1/PCK1/TFRC/MMP2/INHBA/STK11/TENM2/BMPR1B/STMN2/ALDH1A2/MYL2/IGF2BP3/NTRK2/FOS/RIF1/TSPAN12/STMN3/ETS1/GFRA1/IRX4/…	BP
GO:0006873	intracellular monoatomic ion homeostasis	48	0.449701	1.63415	0.00739812	0.0787371	0.0648031	1605	tags=29%, list=13%, signal=25%	ATP1A1/TF/LCK/FTH1/ATP2B1/ATP2A2/CACNA1C/TMEM175/RGN/ATP6V0A1/SLC8B1/HSP90B1/CAPN3/TFRC	BP
GO:0035295	tube development	73	0.399032	1.56876	0.00757933	0.0797167	0.0656093	2247	tags=32%, list=18%, signal=26%	ATP5B/FOSL2/FZD4/VEGFA/NRP1/CDH2/TGFB3/MYH9/RBPMS2/ITGAV/BSG/GATA3/NKX2-5/ISL1/HPSE/NRXN1/GATA2/ALDH1A2/TSPAN12/ETS1/PROX1/WDR48/CHD7	BP
GO:0007165	signal transduction	412	0.275089	1.33931	0.00782829	0.0798471	0.0657166	2842	tags=30%, list=23%, signal=24%	FOSL2/SOX11/FZD4/VEGFA/WWOX/NRP1/PTPRJ/LCK/DKK3/FZD1/CDH2/HYOU1/TGFB3/CCN3/AVP/FGFRL1/GFRA4/RGMA/EFNB1/SPRY2/NR2F2/NPPA/ZYX/GNAI1/LRP1/RBPMS2/CHRNG/BCL2L10/ITGAV/LPL/GLG1/USP28/FZD2/NTRK3/FYN/SOCS3/NFKB1/DRAXIN/GATA3/FGFR1/NCLN/JAK2/NMU/NKX2-5/PRKAR1A/NFKBIA/EGFR/ISL1/REL/EPHA5/EYA3/NKIRAS2/LY86/CNOT7/CHRNB2/RPS6KA1/FGFR2/PMS2/BCL6/CACNA1C/LAMTOR3/ADCY9/UBAC2/RGN/SPP1/OGN/OSTF1/ADCYAP1/FGFR3/GFRA…	BP
GO:0060485	mesenchyme development	43	0.462209	1.64138	0.00798509	0.0798471	0.0657166	870	tags=21%, list=7%, signal=20%	VEGFA/NRP1/CDH2/TGFB3/SOX8/GATA3/FGFR1/NKX2-5/ISL1	BP
GO:0019725	cellular homeostasis	61	0.418792	1.59384	0.00799361	0.0798471	0.0657166	1605	tags=28%, list=13%, signal=24%	PCK2/ATP1A1/TF/LCK/FTH1/ATP2B1/SELENOT/ATP2A2/CACNA1C/TMEM175/RGN/ATP6V0A1/SLC8B1/HSP90B1/CAPN3/PCK1/TFRC	BP
GO:0071495	cellular response to endogenous stimulus	107	0.361012	1.51075	0.00811499	0.0798471	0.0657166	2930	tags=40%, list=24%, signal=31%	FZD4/VEGFA/WWOX/NRP1/PCK2/TGFB3/FGFRL1/RGMA/ACAP2/SPRY2/ZYX/RBPMS2/GLG1/NTRK3/GATA3/FGFR1/JAK2/PRKAR1A/EGFR/FGFR2/LAMTOR3/FGFR3/CHRM2/HDAC1/PCK1/MMP2/ESR2/BMPR1B/STMN2/NTRK2/FOS/THRB/FLRT3/PKLR/P2RY6/IGF2/SMAD6/TGFB2/THRA/GHR/AGTR1/MYO5A/RAB14	BP
GO:0015031	protein transport	111	-0.311486	-1.46732	0.00812951	0.0798471	0.0657166	2754	tags=35%, list=22%, signal=28%	SEC31A/HSPA5/TGFBR2/RAB11A/RAB2A/ATG7/ATG4B/KLHL20/CHMP4B/RAN/YWHAB/GOLGA7/EXOC8/AACS/SEC16B/P3H1/RAB33B/HSPD1/WLS/DCTN1/AKTIP/SEC23B/HOOK1/NSG1/NUP42/VAMP7/VPS51/CHMP2A/STRADA/CHP1/PEX5/PAFAH1B1/ARCN1/SPCS3/ENSA/RAB5B/KPNA1/ACTN4/LSG1	BP
GO:0048514	blood vessel morphogenesis	48	0.446632	1.623	0.00815651	0.0798471	0.0657166	2247	tags=33%, list=18%, signal=27%	ATP5B/FZD4/VEGFA/NRP1/CDH2/MYH9/ITGAV/BSG/NKX2-5/ISL1/HPSE/NRXN1/GATA2/TSPAN12/ETS1/CHD7	BP
GO:0098660	inorganic ion transmembrane transport	66	0.408127	1.57625	0.00821693	0.0798471	0.0657166	1565	tags=24%, list=13%, signal=21%	ATP5B/ATP1A1/TF/KCNMA1/PLN/ATP2B1/TESC/ATP2A2/ASIC1/CACNA1C/TMEM175/ORAI3/ATP6V0A1/SCNN1A/SLC8B1/CAPN3	BP
GO:0043207	response to external biotic stimulus	76	0.391729	1.55027	0.00857248	0.08094	0.0666161	3278	tags=42%, list=27%, signal=31%	FOSL2/TF/LCK/IRF8/ALB/AvBD12/FYN/NFKB1/GATA3/NFKBIA/REL/LY86/CNOT7/N4BP1/AvBD10/LYG2/CHRM2/PCK1/NFKB2/AvBD9/CHD7/CHUK/TOLLIP/YES1/CASP7/COLEC11/TGFB2/RAB14/IL8L2/LOC395551/SLC11A1/CASP6	BP
GO:0051707	response to other organism	76	0.391729	1.55027	0.00857248	0.08094	0.0666161	3278	tags=42%, list=27%, signal=31%	FOSL2/TF/LCK/IRF8/ALB/AvBD12/FYN/NFKB1/GATA3/NFKBIA/REL/LY86/CNOT7/N4BP1/AvBD10/LYG2/CHRM2/PCK1/NFKB2/AvBD9/CHD7/CHUK/TOLLIP/YES1/CASP7/COLEC11/TGFB2/RAB14/IL8L2/LOC395551/SLC11A1/CASP6	BP
GO:0090257	regulation of muscle system process	15	0.624776	1.72164	0.00860101	0.08094	0.0666161	1513	tags=47%, list=12%, signal=41%	TNNT2/TNNT3/MYBPC3/NMU/NKX2-5/CACNA1C/CHRM2	BP
GO:0023052	signaling	441	0.270809	1.32472	0.00898939	0.0837137	0.0688989	2842	tags=29%, list=23%, signal=23%	FOSL2/SOX11/FZD4/VEGFA/WWOX/NRP1/PTPRJ/LCK/DKK3/FZD1/CDH2/HYOU1/TGFB3/CCN3/AVP/FGFRL1/GFRA4/RGMA/EFNB1/SPRY2/NR2F2/NPPA/ZYX/GNAI1/LRP1/RBPMS2/CHRNG/BCL2L10/ITGAV/LPL/GLG1/USP28/FZD2/NTRK3/FYN/SOCS3/SELENOT/NFKB1/DRAXIN/GATA3/TBX3/FGFR1/NCLN/JAK2/NMU/NKX2-5/PRKAR1A/NFKBIA/EGFR/ISL1/REL/EPHA5/EYA3/NKIRAS2/LY86/CNOT7/CHRNB2/RPS6KA1/FGFR2/PMS2/BCL6/CACNA1C/LAMTOR3/ADCY9/UBAC2/RGN/SPP1/OGN/OSTF1/ADCYA…	BP
GO:0007154	cell communication	449	0.269489	1.32006	0.00947862	0.0859088	0.0707056	2842	tags=29%, list=23%, signal=23%	FOSL2/SOX11/FZD4/VEGFA/WWOX/NRP1/PTPRJ/LCK/DKK3/FZD1/CDH2/HYOU1/TGFB3/CCN3/AVP/FGFRL1/GFRA4/RGMA/EFNB1/SPRY2/NR2F2/NPPA/ZYX/ALB/GNAI1/LRP1/RBPMS2/CHRNG/BCL2L10/ITGAV/LPL/GLG1/USP28/FZD2/NTRK3/FYN/SOCS3/SELENOT/NFKB1/DRAXIN/GATA3/TBX3/FGFR1/NCLN/JAK2/NMU/NKX2-5/PRKAR1A/NFKBIA/EGFR/ISL1/REL/EPHA5/EYA3/NKIRAS2/LY86/CNOT7/CHRNB2/RPS6KA1/FGFR2/PMS2/BCL6/CACNA1C/LAMTOR3/ADCY9/UBAC2/RGN/SPP1/OGN/OSTF1/A…	BP
GO:0016236	macroautophagy	27	-0.484374	-1.68637	0.00949269	0.0859088	0.0707056	2541	tags=48%, list=21%, signal=38%	ATG7/ATG4B/TECPR1/UFL1/WDR24/TMEM41B/RAB33B/PHB2/YOD1/WIPI2/CTSD/PEX5/NSFL1C	BP
GO:0007346	regulation of mitotic cell cycle	24	-0.504204	-1.70047	0.00951339	0.0859088	0.0707056	2882	tags=67%, list=23%, signal=51%	PRKDC/TAOK3/PABIR3/CDC42/BRE/BTG1/CASP2/ANAPC5/NDC80/FAM175A/NBN/PSME3/ASNS/MSH6/TIPIN/RB1	BP
GO:0006260	DNA replication	35	-0.442387	-1.64309	0.00980654	0.087046	0.0716415	976	tags=26%, list=8%, signal=24%	NFIC/DNA2/RPA1/MSH6/PCNA/FEN1/RAD51/NFIA/TIPIN	BP
GO:0051239	regulation of multicellular organismal process	158	0.328562	1.45168	0.00983405	0.087046	0.0716415	2842	tags=34%, list=23%, signal=26%	FOSL2/VEGFA/NRP1/TNNT2/LCK/TNNT3/TGFB3/IRF8/PLN/ITGAV/LPL/GLG1/MYBPC3/TESC/GATA3/MAFB/NMU/NKX2-5/PRKAR1A/ISL1/PMS2/BCL6/CACNA1C/VCAN/N4BP1/SPP1/CHRM2/GATA2/CAPN3/HDAC1/PCK1/TFRC/MMP2/INHBA/BMPR1B/NTRK2/VIP/FOS/RIF1/TSPAN12/ETS1/FLRT3/FST/CHD7/WNT9A/LFNG/ADORA2B/FRZB/IGF2/SMAD6/TGFB2/THRA/AGTR1	BP
GO:0016054	organic acid catabolic process	16	0.604084	1.69523	0.0108034	0.0926758	0.0762751	2484	tags=62%, list=20%, signal=50%	PCK2/GLDC/AMT/ECHDC1/ACAD11/HMGCL/PCK1/HIBCH/GCSH/NPL	BP
GO:0046395	carboxylic acid catabolic process	16	0.604084	1.69523	0.0108034	0.0926758	0.0762751	2484	tags=62%, list=20%, signal=50%	PCK2/GLDC/AMT/ECHDC1/ACAD11/HMGCL/PCK1/HIBCH/GCSH/NPL	BP
GO:0044419	biological process involved in interspecies interaction between organisms	83	0.379821	1.52569	0.010831	0.0926758	0.0762751	2942	tags=39%, list=24%, signal=30%	FOSL2/TF/LCK/IRF8/ALB/AvBD12/FYN/NFKB1/GATA3/NFKBIA/REL/LY86/CNOT7/N4BP1/AvBD10/LYG2/CHRM2/HDAC1/PCK1/NFKB2/JUN/AvBD9/CHD7/CHUK/TOLLIP/YES1/CASP7/COLEC11/TGFB2/AGTR1/RAB14/IL8L2	BP
GO:0010817	regulation of hormone levels	33	0.48767	1.63463	0.0108847	0.0926758	0.0762751	2247	tags=42%, list=18%, signal=35%	FZD4/DIO2/SELENOT/GATA3/TBX3/PRKAR1A/ISL1/ADH1C/ADCYAP1/MAFA/INHBA/ALDH1A2/VIP/CHD7	BP
GO:0009607	response to biotic stimulus	77	0.38505	1.52761	0.0111551	0.0937112	0.0771272	3278	tags=42%, list=27%, signal=31%	FOSL2/TF/LCK/IRF8/ALB/AvBD12/FYN/NFKB1/GATA3/NFKBIA/REL/LY86/CNOT7/N4BP1/AvBD10/LYG2/CHRM2/PCK1/NFKB2/AvBD9/CHD7/CHUK/TOLLIP/YES1/CASP7/COLEC11/TGFB2/RAB14/IL8L2/LOC395551/SLC11A1/CASP6	BP
GO:0048762	mesenchymal cell differentiation	38	0.466421	1.61316	0.011216	0.0937112	0.0771272	3189	tags=42%, list=26%, signal=31%	VEGFA/NRP1/CDH2/TGFB3/SOX8/GATA3/FGFR1/ISL1/CDH5/CCNB1/CTNNA2/FRZB/TGFB2/FAM172A/HAS2/NELL2	BP
GO:0033365	protein localization to organelle	56	-0.374532	-1.54836	0.0114802	0.0950265	0.0782097	3106	tags=45%, list=25%, signal=34%	KDELR2/KPTN/LMBRD1/RDX/PCM1/YWHAZ/HSPA5/SOX9/SUMO3/RAB11A/ABHD17B/RAN/SEC16B/RAB33B/HSPD1/CDK9/LMNB2/RPA1/TERF2/CHP1/PEX5/NSFL1C/SPCS3/KPNA1/GET4	BP
GO:0044283	small molecule biosynthetic process	56	0.418927	1.56962	0.011586	0.0950265	0.0782097	3043	tags=52%, list=25%, signal=39%	PCK2/MOXD1/XDH/LPL/GCH1/PGK2/FASN/ASL/HSDL1/RGN/ALDOB/HPGDS/SIRT5/HMGCL/ASNSD1/PCK1/PGP/COQ5/UGDH/ALDH1A2/FDPS/DHFR/ELOVL6/PTGS2/P2RY6/HAGH/ARPP19/PCBD2/LBR	BP
GO:0002682	regulation of immune system process	74	0.386861	1.52422	0.0118904	0.0966364	0.0795347	2021	tags=28%, list=16%, signal=24%	FOSL2/VEGFA/PTPRJ/LCK/TGFB3/TESC/GATA3/MAFB/PRKAR1A/NFKBIA/CNOT7/PMS2/BCL6/N4BP1/SLC8B1/MYO1G/PCK1/TFRC/INHBA/FOS/RIF1	BP
GO:1901700	response to oxygen-containing compound	88	0.370628	1.50277	0.012399	0.0998619	0.0821894	2942	tags=39%, list=24%, signal=30%	FOSL2/PCK2/TF/TGFB3/GATA4/IRF8/GLDC/GNAI1/SELENOT/TESC/JAK2/PRKAR1A/LY86/SOD1/LAMTOR3/SPINK5/CHRM2/CAPN3/PCK1/MAFA/MMP2/ESR2/ALDH1A2/FOS/DHFR/MYOD1/PKLR/P2RY6/IGF2/TGFB2/GHR/AGTR1/MYO5A/IL8L2	BP
GO:0035239	tube morphogenesis	61	0.406449	1.54687	0.0127747	0.101969	0.0839239	2247	tags=33%, list=18%, signal=27%	ATP5B/FZD4/VEGFA/NRP1/CDH2/MYH9/RBPMS2/ITGAV/BSG/GATA3/NKX2-5/ISL1/HPSE/NRXN1/GATA2/ALDH1A2/TSPAN12/ETS1/PROX1/CHD7	BP
GO:0030098	lymphocyte differentiation	16	0.596802	1.67479	0.0129335	0.102323	0.0842151	2876	tags=62%, list=23%, signal=48%	FOSL2/LCK/TOP2B/GATA3/BCL6/PCK1/CHD7/SH2D6/LFNG/CD3E	BP
GO:0097193	intrinsic apoptotic signaling pathway	20	0.559657	1.66285	0.0131113	0.10282	0.0846241	1761	tags=35%, list=14%, signal=30%	WWOX/LCK/HYOU1/BCL2L10/USP28/HDAC1/STK11	BP
GO:0030155	regulation of cell adhesion	44	0.443527	1.58218	0.013371	0.103945	0.0855501	1626	tags=30%, list=13%, signal=26%	FZD4/VEGFA/PTPRJ/LCK/CDH2/TESC/GATA3/PRKAR1A/BCL6/PLAU/PCK1/TFRC/MMP2	BP
GO:0010564	regulation of cell cycle process	45	-0.395633	-1.55838	0.0138893	0.106918	0.0879971	2422	tags=44%, list=20%, signal=36%	BCL2L1/CASP2/MYC/ANAPC5/NDC80/UFL1/CHORDC1/FAM175A/DCTN1/NBN/TRIP13/DNA2/PSME3/SPAST/MDM1/MSH6/NSFL1C/FEN1/TIPIN/RB1	BP
GO:0008283	cell population proliferation	224	0.299198	1.37759	0.0139927	0.106918	0.0879971	2324	tags=27%, list=19%, signal=22%	FOSL2/FZD4/VEGFA/NRP1/FBF1/GAP43/CDH2/TGFB3/FTH1/FGFRL1/EFNB1/NAA35/DISP3/RBPMS2/RPS6/NFASC/USP28/NTRK3/BSG/MAPRE1/FAM206A/DRAXIN/GATA3/FGFR1/JAK2/NKX2-5/PRKAR1A/NFKBIA/ISL1/OTUD6A/EPHA5/CNOT7/FGFR2/PMS2/BCL6/VCAN/MUSTN1/ADCYAP1/FGFR3/MAPK4/HDAC1/TFRC/MMP2/INHBA/JUN/TENM2/BMPR1B/STMN2/FAM60A/NTRK2/VIP/TSC22D1/STMN3/ASCC3/FLRT3/FST/SIX3/WDR48/ITGA1/SLC25A46	BP
GO:0002520	immune system development	16	0.590653	1.65754	0.0153191	0.116061	0.0955222	2217	tags=56%, list=18%, signal=46%	REV1/TGFB3/GATA3/NKX2-5/PMS2/BCL6/TFRC/RIF1/CCNB1	BP
GO:0034660	ncRNA metabolic process	56	-0.364828	-1.50824	0.0166506	0.124324	0.102323	2669	tags=41%, list=22%, signal=32%	SOX9/DCAF13/INTS10/DKC1/FTSJ3/RPL7A/MYC/IARS2/NOL11/C1D/CARS/DDX1/PUM1/METTL16/UTP15/INTS9/VWA9/RPL35/OCLN/PRL/TRMU/INTS2/SMARCB1	BP
GO:0042127	regulation of cell population proliferation	146	0.323995	1.41671	0.0166878	0.124324	0.102323	2298	tags=29%, list=19%, signal=24%	FOSL2/FZD4/VEGFA/NRP1/CDH2/TGFB3/FTH1/FGFRL1/DISP3/RBPMS2/RPS6/NTRK3/FAM206A/GATA3/FGFR1/JAK2/NKX2-5/PRKAR1A/NFKBIA/ISL1/CNOT7/FGFR2/PMS2/BCL6/VCAN/FGFR3/HDAC1/TFRC/MMP2/INHBA/JUN/TENM2/BMPR1B/STMN2/FAM60A/NTRK2/VIP/TSC22D1/FST/SIX3/WDR48/ITGA1	BP
GO:0008380	RNA splicing	49	-0.378164	-1.51836	0.0177377	0.131042	0.107852	1684	tags=27%, list=14%, signal=23%	DDX1/METTL16/NCBP1/TARDBP/TFIP11/PRKRIP1/KHDC4/MBNL1/SMU1/RBM24/QKI/STRAP/SRSF2	BP
GO:0002521	leukocyte differentiation	26	0.506823	1.60605	0.0178827	0.131042	0.107852	3043	tags=58%, list=25%, signal=44%	FOSL2/LCK/IRF8/MYH9/TOP2B/TESC/GATA3/BCL6/PCK1/FOS/CHD7/SH2D6/LFNG/CD3E/LBR	BP
GO:0022402	cell cycle process	107	-0.299543	-1.40234	0.0184089	0.133802	0.110123	2489	tags=32%, list=20%, signal=26%	CCNB3/BCL2L1/CASP2/BRIP1/CHMP4B/MYC/ANAPC5/RAN/CENPT/TOP2A/KIZ/DCTN2/NDC80/UFL1/CHORDC1/FAM175A/DCTN1/NBN/TRIP13/DNA2/PSME3/SPAST/MDM1/CHMP2A/CENPN/MASTL/MSH6/PAFAH1B1/NSFL1C/FEN1/ENSA/RAD51/TIPIN/RB1	BP
GO:0071103	DNA conformation change	18	-0.531064	-1.65569	0.0186765	0.134652	0.110823	2317	tags=56%, list=19%, signal=45%	BRIP1/TOP2A/XRCC6/DDX1/NBN/MCM8/DNA2/HMGB2/SUPV3L1/RAD51	BP
GO:0006886	intracellular protein transport	46	-0.383469	-1.51922	0.018907	0.135223	0.111293	2754	tags=37%, list=22%, signal=29%	SEC31A/HSPA5/RAB11A/RAN/YWHAB/GOLGA7/HSPD1/WLS/DCTN1/SEC23B/NSG1/STRADA/CHP1/PEX5/SPCS3/RAB5B/KPNA1	BP
GO:0009628	response to abiotic stimulus	77	0.370704	1.47069	0.0204192	0.144879	0.11924	1781	tags=25%, list=14%, signal=21%	FOSL2/FZD4/VEGFA/XPA/HYOU1/TGFB3/USP28/GATA3/INIP/ASIC1/EYA3/CHRNB2/HSF2/CAPN3/PCK1/MMP2/SUV39H2/STK11/UVSSA	BP
GO:0071705	nitrogen compound transport	139	-0.277688	-1.35543	0.0207526	0.146085	0.120232	1832	tags=24%, list=15%, signal=20%	YWHAB/GOLGA7/EXOC8/AACS/SEC16B/SLC48A1/P3H1/ZC3H11A/RAB33B/HSPD1/WLS/DCTN1/AKTIP/NCBP1/SEC23B/HOOK1/NSG1/NUP42/VAMP7/VPS51/CHMP2A/STRADA/CHP1/QKI/PEX5/PAFAH1B1/ARCN1/SPCS3/ENSA/RAB5B/KPNA1/ACTN4/LSG1	BP
GO:0014032	neural crest cell development	20	0.540058	1.60461	0.0213373	0.146347	0.120448	870	tags=20%, list=7%, signal=19%	NRP1/CDH2/SOX8/ISL1	BP
GO:0048864	stem cell development	20	0.540058	1.60461	0.0213373	0.146347	0.120448	870	tags=20%, list=7%, signal=19%	NRP1/CDH2/SOX8/ISL1	BP
GO:0006082	organic acid metabolic process	79	0.367378	1.46405	0.0216083	0.146347	0.120448	2505	tags=39%, list=20%, signal=31%	PCK2/GLDC/LPL/PGK2/ST3GAL1/FASN/ST6GAL1/ENO2/ASL/HSDL1/AMT/ADH1C/RGN/ALDOB/ECHDC1/HPGDS/ACAD11/HAGHL/HMGCL/ASNSD1/PCK1/UGDH/ALDH1A2/PM20D1/HIBCH/DHFR/GCSH/ELOVL6/CYP2C23a/NPL/PTGS2	BP
GO:0019752	carboxylic acid metabolic process	79	0.367378	1.46405	0.0216083	0.146347	0.120448	2505	tags=39%, list=20%, signal=31%	PCK2/GLDC/LPL/PGK2/ST3GAL1/FASN/ST6GAL1/ENO2/ASL/HSDL1/AMT/ADH1C/RGN/ALDOB/ECHDC1/HPGDS/ACAD11/HAGHL/HMGCL/ASNSD1/PCK1/UGDH/ALDH1A2/PM20D1/HIBCH/DHFR/GCSH/ELOVL6/CYP2C23a/NPL/PTGS2	BP
GO:0043436	oxoacid metabolic process	79	0.367378	1.46405	0.0216083	0.146347	0.120448	2505	tags=39%, list=20%, signal=31%	PCK2/GLDC/LPL/PGK2/ST3GAL1/FASN/ST6GAL1/ENO2/ASL/HSDL1/AMT/ADH1C/RGN/ALDOB/ECHDC1/HPGDS/ACAD11/HAGHL/HMGCL/ASNSD1/PCK1/UGDH/ALDH1A2/PM20D1/HIBCH/DHFR/GCSH/ELOVL6/CYP2C23a/NPL/PTGS2	BP
GO:0060322	head development	34	0.459211	1.54963	0.0223927	0.149582	0.123111	2490	tags=35%, list=20%, signal=28%	FZD4/NRP1/CDH2/TGFB3/FYN/DRAXIN/ISL1/MMP2/FLRT3/SIX3/CHD7/CTNNA2	BP
GO:0006913	nucleocytoplasmic transport	24	-0.471836	-1.59131	0.0225879	0.149582	0.123111	1552	tags=33%, list=13%, signal=29%	ZC3H11A/NCBP1/PDLIM7/NUP42/STRADA/CHP1/KPNA1/LSG1	BP
GO:0051169	nuclear transport	24	-0.471836	-1.59131	0.0225879	0.149582	0.123111	1552	tags=33%, list=13%, signal=29%	ZC3H11A/NCBP1/PDLIM7/NUP42/STRADA/CHP1/KPNA1/LSG1	BP
GO:0034470	ncRNA processing	38	-0.402933	-1.52615	0.0229935	0.151148	0.1244	2610	tags=42%, list=21%, signal=33%	DCAF13/INTS10/DKC1/FTSJ3/RPL7A/NOL11/C1D/DDX1/PUM1/METTL16/UTP15/INTS9/VWA9/RPL35/TRMU/INTS2	BP
GO:0006397	mRNA processing	57	-0.353767	-1.46761	0.0234178	0.152194	0.12526	1684	tags=26%, list=14%, signal=23%	DDX1/XRN2/METTL16/NCBP1/TARDBP/TFIP11/PRKRIP1/TDRD3/KHDC4/MBNL1/SMU1/RBM24/QKI/STRAP/SRSF2	BP
GO:1901615	organic hydroxy compound metabolic process	44	0.426257	1.52057	0.023493	0.152194	0.12526	3043	tags=48%, list=25%, signal=36%	PCK2/MOXD1/DIO2/APOB/DISP3/GCH1/FASN/GATA3/LCAT/ADH1C/HAGHL/PCK1/PGP/ALDH1A2/FDPS/P2RY6/CYB5R2/TGFB2/HAGH/PCBD2/LBR	BP
GO:0032880	regulation of protein localization	48	-0.370938	-1.48298	0.0243	0.155296	0.127814	3024	tags=48%, list=25%, signal=36%	RDX/PCM1/YWHAZ/SUMO3/TGFBR2/RAB11A/FAM65B/BCL2L1/ABHD17B/RAN/EPB41/VCL/AACS/P3H1/WLS/PGRMC1/DCTN1/CDK9/PDLIM7/CTSD/CHP1/NSFL1C/ENSA	BP
GO:0030111	regulation of Wnt signaling pathway	31	0.470013	1.55217	0.0243193	0.155296	0.127814	1850	tags=35%, list=15%, signal=30%	SOX11/WWOX/DKK3/CDH2/DRAXIN/NKX2-5/ISL1/UBAC2/HDAC1/STK11/GSKIP	BP
GO:0140014	mitotic nuclear division	23	-0.475873	-1.58692	0.0245665	0.155376	0.127879	3673	tags=61%, list=30%, signal=43%	MIS12/CDC42/KIF18B/SMC2/CCDC61/CDCA9/CHMP4B/ANAPC5/RAN/NDC80/FAM175A/SPAST/CHMP2A/NSFL1C	BP
GO:0001775	cell activation	49	0.410779	1.49897	0.0246793	0.155376	0.127879	2942	tags=47%, list=24%, signal=36%	FOSL2/LCK/TGFB3/IRF8/MYH9/TOP2B/GATA3/PRKAR1A/PMS2/BCL6/CAPN3/PCK1/TFRC/RIF1/CHD7/FGA/SH2D6/LFNG/ADORA2B/IGF2/TGFB2/CD3E/IL8L2	BP
GO:0042254	ribosome biogenesis	38	-0.399523	-1.51324	0.0251846	0.157448	0.129584	2610	tags=45%, list=21%, signal=35%	DCAF13/RPS17/DKC1/FTSJ3/RPL7A/RAN/NOL11/RPS15/C1D/METTL16/UTP15/ERAL1/RPL35/MTERF3/ZNF622/PNO1/LSG1	BP
GO:0010948	negative regulation of cell cycle process	25	-0.459301	-1.56747	0.0258783	0.160661	0.132229	1779	tags=40%, list=14%, signal=34%	NDC80/UFL1/FAM175A/NBN/TRIP13/DNA2/MDM1/MSH6/TIPIN/RB1	BP
GO:0060828	regulation of canonical Wnt signaling pathway	24	0.499537	1.55496	0.0279622	0.172402	0.141892	1850	tags=42%, list=15%, signal=35%	SOX11/DKK3/CDH2/DRAXIN/NKX2-5/ISL1/UBAC2/HDAC1/STK11/GSKIP	BP
GO:0003015	heart process	22	0.512226	1.55979	0.0285629	0.173709	0.142968	2795	tags=45%, list=23%, signal=35%	TNNT2/PLN/NKX2-5/ISL1/CACNA1C/CHRM2/TNNI2/MYL2/TGFB2/THRA	BP
GO:0060047	heart contraction	22	0.512226	1.55979	0.0285629	0.173709	0.142968	2795	tags=45%, list=23%, signal=35%	TNNT2/PLN/NKX2-5/ISL1/CACNA1C/CHRM2/TNNI2/MYL2/TGFB2/THRA	BP
GO:0048545	response to steroid hormone	17	0.552423	1.57546	0.0297225	0.17954	0.147767	1668	tags=41%, list=14%, signal=36%	FOSL2/PCK2/TGFB3/SPINK5/HDAC1/PCK1/ESR2	BP
GO:0031331	positive regulation of cellular catabolic process	15	-0.541881	-1.60106	0.0302014	0.181209	0.14914	1910	tags=47%, list=16%, signal=39%	AGO3/UFL1/PUM1/METTL16/WDR24/RBM24/SUPV3L1	BP
GO:0007033	vacuole organization	21	-0.478671	-1.55906	0.0317867	0.189449	0.155922	1860	tags=43%, list=15%, signal=36%	FNIP1/TMEM251/TMEM41B/RAB33B/AKTIP/WIPI2/HOOK1/CTSD/NSFL1C	BP
GO:0042110	T cell activation	23	0.500083	1.5404	0.0321001	0.189643	0.156082	2876	tags=48%, list=23%, signal=37%	FOSL2/LCK/GATA3/PRKAR1A/BCL6/PCK1/TFRC/CHD7/LFNG/IGF2/CD3E	BP
GO:0048871	multicellular organismal-level homeostasis	34	0.445529	1.50345	0.0322436	0.189643	0.156082	2795	tags=44%, list=23%, signal=34%	FOSL2/CDH2/GATA3/JAK2/NKIRAS2/BCL6/SPP1/SCNN1A/UBA5/INHBA/PM20D1/CCNB1/WDR48/CDIN1/THRA	BP
GO:0009914	hormone transport	22	0.506497	1.54234	0.0331682	0.193806	0.159509	2247	tags=50%, list=18%, signal=41%	FZD4/SELENOT/GATA3/TBX3/PRKAR1A/ISL1/ADCYAP1/MAFA/INHBA/VIP/CHD7	BP
GO:0045596	negative regulation of cell differentiation	41	0.422946	1.48691	0.0335602	0.194824	0.160346	2776	tags=37%, list=23%, signal=28%	SOX2/DISP3/RBPMS2/GATA3/TBX3/NKX2-5/ISL1/FAM60A/RIOX1/FST/SIX3/WNT9A/FRZB/IGF2/SMAD6	BP
GO:0022613	ribonucleoprotein complex biogenesis	59	-0.339037	-1.41743	0.0339253	0.195672	0.161044	2650	tags=36%, list=22%, signal=28%	DENR/DCAF13/RPS17/DKC1/FTSJ3/RPL7A/RAN/NOL11/RPS15/C1D/METTL16/UTP15/PTGES3/ERAL1/KHDC4/RPL35/MTERF3/ZNF622/PNO1/STRAP/LSG1	BP
GO:0014033	neural crest cell differentiation	21	0.511058	1.5366	0.0348499	0.199717	0.164373	3577	tags=43%, list=29%, signal=30%	NRP1/CDH2/SOX8/ISL1/CTNNA2/FRZB/FAM172A/NELL2/SOX10	BP
GO:0048598	embryonic morphogenesis	54	0.388662	1.44578	0.0356652	0.200907	0.165353	2247	tags=35%, list=18%, signal=29%	PCK2/CDH2/SUPT20H/RBPMS2/GATA3/TBX3/NKX2-5/PRKAR1A/C2orf49/HDAC1/PCK1/MMP2/UGDH/ALDH1A2/YBX1/FLRT3/PROX1/SIX3/CHD7	BP
GO:0002684	positive regulation of immune system process	51	0.395172	1.45365	0.0357786	0.200907	0.165353	2791	tags=37%, list=23%, signal=29%	FOSL2/VEGFA/PTPRJ/LCK/TESC/GATA3/NFKBIA/PMS2/BCL6/MYO1G/PCK1/TFRC/FOS/RIF1/CHUK/ADORA2B/IGF2/COLEC11/TGFB2	BP
GO:0048872	homeostasis of number of cells	21	0.509516	1.53196	0.0359196	0.200907	0.165353	2795	tags=52%, list=23%, signal=41%	FOSL2/CDH2/GATA3/JAK2/BCL6/UBA5/INHBA/CCNB1/WDR48/CDIN1/THRA	BP
GO:0010033	response to organic substance	146	0.308274	1.34796	0.0359565	0.200907	0.165353	2942	tags=36%, list=24%, signal=27%	FOSL2/FZD4/PCK2/TF/TGFB3/GATA4/IRF8/GLDC/DISP3/ALB/GNAI1/LPL/SELENOT/NFKB1/TESC/GATA3/JAK2/PRKAR1A/NFKBIA/REL/NKIRAS2/LY86/CNOT7/LAMTOR3/HSF2/SPINK5/CHRM2/HSP90B1/CAPN3/HDAC1/PCK1/MAFA/MMP2/ESR2/NFKB2/ALDH1A2/FOS/THRB/DHFR/CHUK/STUB1/MYOD1/PKLR/P2RY6/IGF2/PTPN1/TGFB2/THRA/GHR/AGTR1/MYO5A/IL8L2	BP
GO:0070588	calcium ion transmembrane transport	22	0.501979	1.52859	0.0362606	0.201315	0.165689	2247	tags=36%, list=18%, signal=30%	PLN/ATP2B1/ATP2A2/CACNA1C/ORAI3/SLC8B1/CAPN3/CHD7	BP
GO:0046879	hormone secretion	21	0.508624	1.52928	0.0366049	0.201315	0.165689	2247	tags=52%, list=18%, signal=43%	FZD4/SELENOT/GATA3/TBX3/PRKAR1A/ISL1/ADCYAP1/MAFA/INHBA/VIP/CHD7	BP
GO:0044057	regulation of system process	31	0.453733	1.4984	0.0367051	0.201315	0.165689	2842	tags=45%, list=23%, signal=35%	TNNT2/TNNT3/PLN/MYBPC3/NMU/NKX2-5/ISL1/CACNA1C/CHRM2/INHBA/ADORA2B/TGFB2/THRA/AGTR1	BP
GO:1901987	regulation of cell cycle phase transition	29	-0.421021	-1.49214	0.0374408	0.203062	0.167127	2408	tags=41%, list=20%, signal=33%	CASP2/ANAPC5/NDC80/UFL1/FAM175A/NBN/TRIP13/DNA2/PSME3/MSH6/TIPIN/RB1	BP
GO:0007030	Golgi organization	16	-0.517847	-1.55789	0.0375148	0.203062	0.167127	2875	tags=69%, list=23%, signal=53%	UBXN2B/YIPF4/YWHAZ/RAB2A/PI4K2B/HACE1/SEC16B/RAB33B/VPS51/LYSMD3/NSFL1C	BP
GO:0009410	response to xenobiotic stimulus	17	0.540769	1.54222	0.0377051	0.203062	0.167127	2877	tags=65%, list=23%, signal=50%	FOSL2/TF/LCK/GSTA2/ATP2A2/CYP1A2/STK11/FOS/CYP2C23a/TGFB2/CYP2C23b	BP
GO:0007420	brain development	28	0.464724	1.49976	0.0380757	0.20383	0.167759	870	tags=21%, list=7%, signal=20%	FZD4/NRP1/CDH2/FYN/DRAXIN/ISL1	BP
GO:0051276	chromosome organization	58	-0.337041	-1.40403	0.0385712	0.205079	0.168786	2317	tags=40%, list=19%, signal=32%	BRIP1/CENPO/MYC/ANAPC5/RAN/CENPT/TOP2A/NDC80/XRCC6/DDX1/FAM175A/PTGES3/NBN/MCM8/TRIP13/DNA2/CENPN/RPA1/TERF2/HMGB2/SUPV3L1/FEN1/RAD51	BP
GO:0031329	regulation of cellular catabolic process	29	-0.419284	-1.48598	0.0387678	0.205079	0.168786	1910	tags=34%, list=16%, signal=29%	AGO3/USP13/UFL1/PUM1/METTL16/WDR24/TIMP2/RBM24/SUPV3L1/TIMP3	BP
GO:0006261	DNA-templated DNA replication	19	-0.485597	-1.53675	0.039036	0.205284	0.168955	951	tags=26%, list=8%, signal=24%	DNA2/MSH6/PCNA/RAD51/TIPIN	BP
GO:1902600	proton transmembrane transport	17	0.537257	1.53221	0.0406094	0.209537	0.172455	1258	tags=29%, list=10%, signal=26%	ATP5B/ATP1A1/TESC/TMEM175/ATP6V0A1	BP
GO:0009725	response to hormone	49	0.394036	1.43787	0.0412456	0.209537	0.172455	2883	tags=43%, list=23%, signal=33%	FOSL2/PCK2/TGFB3/DISP3/GATA3/JAK2/PRKAR1A/SPINK5/HDAC1/PCK1/MMP2/ESR2/THRB/PKLR/P2RY6/IGF2/TGFB2/THRA/GHR/AGTR1/MYO5A	BP
GO:0010959	regulation of metal ion transport	17	0.536312	1.52951	0.0414077	0.209537	0.172455	2247	tags=53%, list=18%, signal=43%	PLN/TESC/NKX2-5/CACNA1C/SLC8B1/CAPN3/VIP/SLC30A6/CHD7	BP
GO:0010648	negative regulation of cell communication	81	0.346682	1.38732	0.0420459	0.209537	0.172455	1236	tags=22%, list=10%, signal=20%	WWOX/PTPRJ/DKK3/CDH2/HYOU1/SPRY2/GNAI1/RBPMS2/GLG1/SOCS3/DRAXIN/GATA3/NKX2-5/ISL1/EYA3/CNOT7/BCL6/UBAC2	BP
GO:0023057	negative regulation of signaling	81	0.346682	1.38732	0.0420459	0.209537	0.172455	1236	tags=22%, list=10%, signal=20%	WWOX/PTPRJ/DKK3/CDH2/HYOU1/SPRY2/GNAI1/RBPMS2/GLG1/SOCS3/DRAXIN/GATA3/NKX2-5/ISL1/EYA3/CNOT7/BCL6/UBAC2	BP
GO:0009968	negative regulation of signal transduction	77	0.3513	1.39371	0.0421431	0.209537	0.172455	1236	tags=22%, list=10%, signal=20%	WWOX/PTPRJ/DKK3/CDH2/HYOU1/SPRY2/RBPMS2/GLG1/SOCS3/DRAXIN/GATA3/NKX2-5/ISL1/EYA3/CNOT7/BCL6/UBAC2	BP
GO:0050684	regulation of mRNA processing	15	-0.522362	-1.54339	0.0423443	0.209537	0.172455	1604	tags=40%, list=13%, signal=35%	METTL16/NCBP1/SMU1/RBM24/QKI/SRSF2	BP
GO:0048812	neuron projection morphogenesis	63	0.368283	1.41013	0.0424189	0.209537	0.172455	940	tags=19%, list=8%, signal=18%	FZD4/NRP1/GAP43/CDH2/EFNB1/NFASC/BSG/FAM206A/DRAXIN/GATA3/ISL1/EPHA5	BP
GO:0048858	cell projection morphogenesis	63	0.368283	1.41013	0.0424189	0.209537	0.172455	940	tags=19%, list=8%, signal=18%	FZD4/NRP1/GAP43/CDH2/EFNB1/NFASC/BSG/FAM206A/DRAXIN/GATA3/ISL1/EPHA5	BP
GO:0120039	plasma membrane bounded cell projection morphogenesis	63	0.368283	1.41013	0.0424189	0.209537	0.172455	940	tags=19%, list=8%, signal=18%	FZD4/NRP1/GAP43/CDH2/EFNB1/NFASC/BSG/FAM206A/DRAXIN/GATA3/ISL1/EPHA5	BP
GO:0030099	myeloid cell differentiation	30	0.451431	1.47976	0.042477	0.209537	0.172455	1982	tags=37%, list=16%, signal=31%	FOSL2/IRF8/MYH9/TESC/GATA3/MAFB/JAK2/BCL6/UBA5/INHBA/FOS	BP
GO:0051641	cellular localization	252	-0.230896	-1.22117	0.0426574	0.209537	0.172455	1832	tags=22%, list=15%, signal=19%	YWHAB/RAP1B/GOLGA7/NDC80/EXOC8/VCL/AACS/SEC16B/FAM175A/P3H1/ZC3H11A/RAB33B/HSPD1/WLS/PGRMC1/DCTN1/SCP2/AKTIP/NCBP1/WIPI2/SEC23B/HOOK1/CDK9/TRAPPC2/TWF2/ANKRD52/PDZD11/NSG1/ZFYVE27/PDLIM7/NUP42/SPAST/CTSD/VAMP7/VPS51/CHMP2A/LMNB2/RPA1/STRADA/TERF2/CHP1/KIF1BP/PEX5/PAFAH1B1/TBC1D23/ARCN1/NSFL1C/SPCS3/ENSA/RAB5B/KPNA1/GET4/ACTN4/LSG1/PRNP	BP
GO:0050776	regulation of immune response	47	0.396003	1.43292	0.0445882	0.216109	0.177864	3930	tags=51%, list=32%, signal=35%	FOSL2/PTPRJ/LCK/GATA3/NFKBIA/CNOT7/PMS2/BCL6/N4BP1/MYO1G/PCK1/TFRC/RIF1/CHUK/ADORA2B/COLEC11/TGFB2/CASP6/PLA2G4A/SPPL2C/MBL2/FGR/RNF5/PIK3AP1	BP
GO:0009617	response to bacterium	29	0.453817	1.4758	0.0447473	0.216109	0.177864	3184	tags=48%, list=26%, signal=36%	FOSL2/TF/IRF8/AvBD12/LY86/AvBD10/LYG2/PCK1/AvBD9/CHD7/CASP7/RAB14/IL8L2/SLC11A1	BP
GO:0043484	regulation of RNA splicing	19	-0.477858	-1.51226	0.0449565	0.216109	0.177864	691	tags=32%, list=6%, signal=30%	METTL16/MBNL1/SMU1/RBM24/QKI/SRSF2	BP
GO:0006874	intracellular calcium ion homeostasis	21	0.498569	1.49905	0.0449622	0.216109	0.177864	2247	tags=38%, list=18%, signal=31%	ATP2B1/ATP2A2/CACNA1C/RGN/SLC8B1/CAPN3/CALB1/CHD7	BP
GO:0000902	cell morphogenesis	89	0.336841	1.36813	0.0458467	0.218339	0.179699	1419	tags=20%, list=12%, signal=18%	FOSL2/FZD4/NRP1/GAP43/CDH2/MYH9/EFNB1/NFASC/BSG/FYN/FAM206A/DRAXIN/GATA3/ISL1/EPHA5/BCL6/CDH5/CDH20	BP
GO:0016072	rRNA metabolic process	19	-0.476626	-1.50836	0.0459146	0.218339	0.179699	2610	tags=53%, list=21%, signal=42%	DCAF13/DKC1/FTSJ3/RPL7A/NOL11/C1D/METTL16/UTP15/RPL35/SMARCB1	BP
GO:0046649	lymphocyte activation	32	0.438273	1.45831	0.0474527	0.222472	0.183101	2876	tags=47%, list=23%, signal=36%	FOSL2/LCK/TOP2B/GATA3/PRKAR1A/PMS2/BCL6/PCK1/TFRC/RIF1/CHD7/SH2D6/LFNG/IGF2/CD3E	BP
GO:0007160	cell-matrix adhesion	17	0.529372	1.50972	0.047488	0.222472	0.183101	1626	tags=35%, list=13%, signal=31%	VEGFA/PTPRJ/ITGAV/BCL6/HPSE/MMP2	BP
GO:0048583	regulation of response to stimulus	256	0.271633	1.26857	0.0475303	0.222472	0.183101	2832	tags=29%, list=23%, signal=22%	FOSL2/SOX11/FZD4/VEGFA/WWOX/NRP1/PTPRJ/LCK/DKK3/CDH2/HYOU1/SPRY2/GNAI1/RBPMS2/GLG1/RMI2/NTRK3/SOCS3/DRAXIN/FASN/GATA3/FGFR1/NCLN/JAK2/NKX2-5/NFKBIA/ISL1/EYA3/NKIRAS2/LY86/CNOT7/PMS2/BCL6/LAMTOR3/ACTR2/UBAC2/RGN/N4BP1/SLC8B1/ADCYAP1/FGFR3/MYO1G/CAPN3/HDAC1/PCK1/TFRC/MMP2/INHBA/STK11/FEM1B/GSKIP/NTRK2/RIF1/FST/RPL5/SIX3/WDR48/ITGA1/MVB12A/CHUK/UBE2I/LFNG/ADORA2B/P2RY6/FRZB/IGF2/PTPN1/COLEC11/SMAD6/…	BP
GO:0001817	regulation of cytokine production	30	0.445833	1.46141	0.048566	0.225691	0.185751	1259	tags=27%, list=10%, signal=24%	TGFB3/IRF8/ITGAV/LPL/GATA3/ISL1/BCL6/N4BP1	BP
GO:0006091	generation of precursor metabolites and energy	28	0.453131	1.46235	0.0492802	0.225691	0.185751	2037	tags=39%, list=17%, signal=33%	ATP5B/PCK2/PGK2/ENO2/ADH1C/ALDOB/HMGCL/MTFR1/PM20D1/SDHB/PRPS2	BP
GO:1901988	negative regulation of cell cycle phase transition	24	-0.435114	-1.46746	0.0498054	0.225691	0.185751	1779	tags=38%, list=14%, signal=32%	NDC80/UFL1/FAM175A/NBN/TRIP13/DNA2/MSH6/TIPIN/RB1	BP
GO:0050793	regulation of developmental process	159	0.295321	1.3056	0.0498851	0.225691	0.185751	2842	tags=33%, list=23%, signal=25%	FOSL2/FZD4/VEGFA/CDH2/TGFB3/MYH9/SOX2/DISP3/RBPMS2/LPL/GLG1/FYN/TESC/GATA3/TBX3/FGFR1/MAFB/NKX2-5/ISL1/PMS2/BCL6/VCAN/GATA2/CAPN3/MAPK4/HDAC1/PCK1/TFRC/MMP2/INHBA/BMPR1B/FAM60A/NTRK2/FOS/RIF1/RIOX1/TSPAN12/ETS1/FLRT3/FST/SIX3/CHD7/LLPH/MYOD1/WNT9A/LFNG/PLEKHB2/FRZB/IGF2/SMAD6/TGFB2/AGTR1	BP
GO:0001816	cytokine production	31	0.44035	1.45421	0.0502212	0.225691	0.185751	1259	tags=26%, list=10%, signal=23%	TGFB3/IRF8/ITGAV/LPL/GATA3/ISL1/BCL6/N4BP1	BP
GO:0000375	RNA splicing, via transesterification reactions	32	-0.394349	-1.43375	0.0503193	0.225691	0.185751	821	tags=22%, list=7%, signal=20%	TFIP11/KHDC4/SMU1/RBM24/QKI/STRAP/SRSF2	BP
GO:0000377	RNA splicing, via transesterification reactions with bulged adenosine as nucleophile	32	-0.394349	-1.43375	0.0503193	0.225691	0.185751	821	tags=22%, list=7%, signal=20%	TFIP11/KHDC4/SMU1/RBM24/QKI/STRAP/SRSF2	BP
GO:0000398	mRNA splicing, via spliceosome	32	-0.394349	-1.43375	0.0503193	0.225691	0.185751	821	tags=22%, list=7%, signal=20%	TFIP11/KHDC4/SMU1/RBM24/QKI/STRAP/SRSF2	BP
GO:0033002	muscle cell proliferation	15	0.544902	1.50154	0.0504901	0.225691	0.185751	2791	tags=53%, list=23%, signal=41%	NAA35/RBPMS2/NKX2-5/PRKAR1A/MMP2/VIP/P2RY6/TGFB2	BP
GO:0090287	regulation of cellular response to growth factor stimulus	20	0.499718	1.48475	0.0513371	0.227047	0.186866	789	tags=30%, list=6%, signal=28%	FZD4/NRP1/SPRY2/RBPMS2/GLG1/GATA3	BP
GO:0045930	negative regulation of mitotic cell cycle	19	-0.47085	-1.49008	0.0515403	0.227047	0.186866	2882	tags=47%, list=23%, signal=36%	BRE/BTG1/CASP2/NDC80/FAM175A/NBN/MSH6/TIPIN/RB1	BP
GO:0045321	leukocyte activation	40	0.408656	1.42911	0.0515553	0.227047	0.186866	2942	tags=45%, list=24%, signal=34%	FOSL2/LCK/IRF8/TOP2B/GATA3/PRKAR1A/PMS2/BCL6/PCK1/TFRC/RIF1/CHD7/SH2D6/LFNG/ADORA2B/IGF2/CD3E/IL8L2	BP
GO:0006952	defense response	84	0.337396	1.35752	0.0522837	0.227549	0.18728	2942	tags=35%, list=24%, signal=26%	FOSL2/TF/LCK/IRF8/AvBD12/FYN/NFKB1/GATA3/NFKBIA/ISL1/REL/NKIRAS2/LY86/CNOT7/BCL6/N4BP1/AvBD10/LYG2/NFKB2/AvBD9/CHUK/TOLLIP/ADORA2B/YES1/CASP7/COLEC11/AGTR1/RAB14/IL8L2	BP
GO:0000226	microtubule cytoskeleton organization	56	-0.330667	-1.36702	0.0526101	0.227549	0.18728	1912	tags=30%, list=16%, signal=26%	KIZ/DCTN2/TUBB3/NDC80/CHORDC1/FAM175A/DCTN1/TUBB1/HOOK1/TUBB4B/SPAST/MDM1/CHP1/KIF1BP/TUB4A/PAFAH1B1/NSFL1C	BP
GO:0045087	innate immune response	49	0.385007	1.40492	0.0526348	0.227549	0.18728	1260	tags=24%, list=10%, signal=22%	FOSL2/LCK/IRF8/AvBD12/FYN/NFKB1/NFKBIA/REL/LY86/CNOT7/N4BP1/AvBD10	BP
GO:0046165	alcohol biosynthetic process	15	0.542419	1.49469	0.0526876	0.227549	0.18728	3043	tags=60%, list=25%, signal=45%	PCK2/MOXD1/GCH1/PCK1/PGP/FDPS/P2RY6/PCBD2/LBR	BP
GO:0007249	canonical NF-kappaB signal transduction	16	0.531291	1.49095	0.0536082	0.228451	0.188022	2514	tags=44%, list=20%, signal=35%	NFKB1/REL/NKIRAS2/CAPN3/HDAC1/NFKB2/UBE2I	BP
GO:0006066	alcohol metabolic process	28	0.449223	1.44973	0.0536447	0.228451	0.188022	2064	tags=39%, list=17%, signal=33%	PCK2/MOXD1/APOB/DISP3/GCH1/LCAT/ADH1C/PCK1/PGP/ALDH1A2/FDPS	BP
GO:0002757	immune response-activating signaling pathway	22	0.483082	1.47104	0.0536842	0.228451	0.188022	860	tags=23%, list=7%, signal=21%	FOSL2/PTPRJ/LCK/GATA3/NFKBIA	BP
GO:1901617	organic hydroxy compound biosynthetic process	20	0.497073	1.4769	0.0539225	0.228451	0.188022	3043	tags=60%, list=25%, signal=45%	PCK2/MOXD1/GCH1/GATA3/PCK1/PGP/FDPS/P2RY6/CYB5R2/TGFB2/PCBD2/LBR	BP
GO:1901652	response to peptide	26	0.459418	1.45583	0.054174	0.228451	0.188022	2883	tags=46%, list=23%, signal=35%	FOSL2/PCK2/JAK2/PRKAR1A/PCK1/MMP2/PKLR/IGF2/TGFB2/GHR/AGTR1/MYO5A	BP
GO:0055074	calcium ion homeostasis	22	0.480916	1.46445	0.0558123	0.234255	0.192799	2247	tags=36%, list=18%, signal=30%	ATP2B1/ATP2A2/CACNA1C/RGN/SLC8B1/CAPN3/CALB1/CHD7	BP
GO:0034504	protein localization to nucleus	16	-0.494151	-1.48661	0.0568289	0.236479	0.19463	2875	tags=44%, list=23%, signal=34%	YWHAZ/SOX9/SUMO3/RAN/LMNB2/CHP1/KPNA1	BP
GO:0043604	amide biosynthetic process	94	-0.283232	-1.29626	0.0570925	0.236479	0.19463	2650	tags=30%, list=22%, signal=24%	DENR/RPL37A/PAIP2B/EIF5A2/RPS17/EIF2S1/UBA52/IARS2/CARNS1/RPS15/AGO3/CARS/PUM1/METTL16/MRPL51/DEGS1/NCBP1/RPL35/RBM24/ASNS/SGMS1/RPS4Y1/ORMDL2/RPL36/EEF1B2/QKI/CNBP/LTN1	BP
GO:1903522	regulation of blood circulation	15	0.537748	1.48182	0.0572714	0.236479	0.19463	2842	tags=53%, list=23%, signal=41%	PLN/NKX2-5/ISL1/CACNA1C/CHRM2/TGFB2/THRA/AGTR1	BP
GO:0000122	negative regulation of transcription by RNA polymerase II	62	0.35945	1.37217	0.0575467	0.236479	0.19463	1820	tags=29%, list=15%, signal=25%	SOX11/SOX8/GATA4/IRF8/NR2F2/GATA3/BRMS1L/NKX2-5/ISL1/IKZF5/BCL6/ZBTB14/GATA5/GATA2/EED/HDAC1/SUV39H2/TENM2	BP
GO:0006518	peptide metabolic process	90	-0.285771	-1.29909	0.0577042	0.236479	0.19463	2650	tags=47%, list=22%, signal=37%	RPL13/RACK1/MRPS7/DNAJC3/CPZ/EIF4A2/PSEN2/RPL39L/RPLP0/MRPS6/PSEN1/EIF1/LOC771456/RPS12/EIF3H/PAN2/DENR/RPL37A/PAIP2B/EIF5A2/RPS17/EIF2S1/UBA52/ACE/IARS2/CARNS1/RPS15/AGO3/CARS/PUM1/METTL16/MRPL51/NCBP1/RPL35/RBM24/RPS4Y1/RPL36/EEF1B2/QKI/CNBP/SPCS3/LTN1	BP
GO:0018105	peptidyl-serine phosphorylation	18	-0.473228	-1.47538	0.0583459	0.236479	0.19463	1784	tags=39%, list=14%, signal=33%	CSNK1A1/SGK1/RPS6KA5/MAPKAP1/CSNK1G1/MASTL/CSNK2A1	BP
GO:0018209	peptidyl-serine modification	18	-0.473228	-1.47538	0.0583459	0.236479	0.19463	1784	tags=39%, list=14%, signal=33%	CSNK1A1/SGK1/RPS6KA5/MAPKAP1/CSNK1G1/MASTL/CSNK2A1	BP
GO:0002764	immune response-regulating signaling pathway	23	0.472394	1.45511	0.0584585	0.236479	0.19463	860	tags=22%, list=7%, signal=20%	FOSL2/PTPRJ/LCK/GATA3/NFKBIA	BP
GO:0022008	neurogenesis	130	0.302826	1.30361	0.0591887	0.238355	0.196173	2530	tags=28%, list=21%, signal=23%	SOX11/FZD4/NRP1/GAP43/CDH2/SOX8/EFNB1/SOX2/DISP3/NFASC/NTRK3/BSG/FYN/FAM206A/DRAXIN/GATA3/NKX2-5/ISL1/EPHA5/VCAN/ADCYAP1/MAPK4/HDAC1/TENM2/STMN2/ALDH1A2/NTRK2/STMN3/IRX4/FLRT3/FST/SIX3/CHD7/SLC25A46/LLPH/CTNNA2/WNT9A	BP
GO:0048585	negative regulation of response to stimulus	94	0.324592	1.33125	0.0596328	0.239066	0.196759	1236	tags=19%, list=10%, signal=17%	WWOX/PTPRJ/DKK3/CDH2/HYOU1/SPRY2/RBPMS2/GLG1/RMI2/SOCS3/DRAXIN/GATA3/NKX2-5/ISL1/EYA3/CNOT7/BCL6/UBAC2	BP
GO:0030335	positive regulation of cell migration	35	0.41674	1.41475	0.0601649	0.23996	0.197495	789	tags=14%, list=6%, signal=13%	FZD4/VEGFA/NRP1/TGFB3/GATA3	BP
GO:0090497	mesenchymal cell migration	17	0.51584	1.47113	0.0606339	0.23996	0.197495	870	tags=18%, list=7%, signal=16%	NRP1/CDH2/ISL1	BP
GO:0048588	developmental cell growth	21	-0.444776	-1.44866	0.0606611	0.23996	0.197495	2669	tags=38%, list=22%, signal=30%	SOX9/DCAF13/PTPRS/VCL/DBN1/ZFYVE27/OLFM1/EXFABP	BP
GO:0006816	calcium ion transport	27	0.448159	1.43322	0.0609684	0.240114	0.197621	2247	tags=33%, list=18%, signal=27%	PLN/ATP2B1/ATP2A2/CACNA1C/ORAI3/SLC8B1/CAPN3/CALB1/CHD7	BP
GO:0051168	nuclear export	18	-0.470502	-1.46688	0.0612718	0.24025	0.197733	2196	tags=61%, list=18%, signal=50%	NXT2/NSUN2/PHAX/THOC5/RAN/ZC3H11A/NCBP1/NUP42/STRADA/CHP1/LSG1	BP
GO:0098542	defense response to other organism	66	0.351702	1.35833	0.0617465	0.240546	0.197977	2942	tags=35%, list=24%, signal=27%	FOSL2/TF/LCK/IRF8/AvBD12/FYN/NFKB1/NFKBIA/REL/LY86/CNOT7/N4BP1/AvBD10/LYG2/NFKB2/AvBD9/CHUK/TOLLIP/YES1/CASP7/COLEC11/RAB14/IL8L2	BP
GO:0045786	negative regulation of cell cycle	27	-0.407999	-1.42047	0.0623071	0.240546	0.197977	1779	tags=37%, list=14%, signal=32%	NDC80/UFL1/FAM175A/NBN/TRIP13/DNA2/MDM1/MSH6/TIPIN/RB1	BP
GO:0065007	biological regulation	943	0.226717	1.15745	0.062643	0.240546	0.197977	2261	tags=22%, list=18%, signal=19%	FOSL2/SOX11/FZD4/CTCF/VEGFA/WWOX/NRP1/PTPRJ/GAP43/PCK2/TNNT2/LCK/DKK3/FZD1/CDH2/TNNT3/HYOU1/SMC5/TGFB3/SOX8/GATA4/IRF8/CCN3/AVP/MYH9/HHEX/SUPT20H/FTH1/KCNMA1/FGFRL1/PKIA/GFRA4/RGMA/EFNB1/PLN/SPRY2/NR2F2/NPPA/ZYX/DIO2/NAA35/SOX2/DISP3/ALB/GNAI1/NCL/LRP1/SSBP3/RBPMS2/MARF1/CHRNG/RPS6/BCL2L10/ITGAV/LPL/GLG1/USP28/FOXD1/FZD2/RMI2/NTRK3/CLPTM1L/FYN/GCH1/MYBPC3/CTDSPL/MAPRE1/SOCS3/SELENOT/NFKB1/TESC/AT…	BP
GO:0010646	regulation of cell communication	213	0.274618	1.25726	0.0626926	0.240546	0.197977	2832	tags=30%, list=23%, signal=24%	SOX11/FZD4/WWOX/NRP1/PTPRJ/LCK/DKK3/CDH2/HYOU1/SPRY2/GNAI1/RBPMS2/ITGAV/GLG1/NTRK3/SOCS3/SELENOT/DRAXIN/GATA3/FGFR1/NCLN/JAK2/NKX2-5/PRKAR1A/ISL1/EYA3/NKIRAS2/LY86/CNOT7/BCL6/LAMTOR3/UBAC2/RGN/ADCYAP1/FGFR3/CHRM2/CAPN3/HDAC1/MMP2/INHBA/STK11/FEM1B/GSKIP/NTRK2/CALB1/FST/RPL5/SIX3/WDR48/CHD7/ITGA1/MVB12A/UBE2I/LFNG/ADORA2B/P2RY6/FRZB/IGF2/PTPN1/SMAD6/TGFB2/THRA/RGS17/GHR	BP
GO:0023051	regulation of signaling	213	0.274618	1.25726	0.0626926	0.240546	0.197977	2832	tags=30%, list=23%, signal=24%	SOX11/FZD4/WWOX/NRP1/PTPRJ/LCK/DKK3/CDH2/HYOU1/SPRY2/GNAI1/RBPMS2/ITGAV/GLG1/NTRK3/SOCS3/SELENOT/DRAXIN/GATA3/FGFR1/NCLN/JAK2/NKX2-5/PRKAR1A/ISL1/EYA3/NKIRAS2/LY86/CNOT7/BCL6/LAMTOR3/UBAC2/RGN/ADCYAP1/FGFR3/CHRM2/CAPN3/HDAC1/MMP2/INHBA/STK11/FEM1B/GSKIP/NTRK2/CALB1/FST/RPL5/SIX3/WDR48/CHD7/ITGA1/MVB12A/UBE2I/LFNG/ADORA2B/P2RY6/FRZB/IGF2/PTPN1/SMAD6/TGFB2/THRA/RGS17/GHR	BP
GO:0007417	central nervous system development	51	0.374731	1.37846	0.0631858	0.241402	0.198681	2247	tags=29%, list=18%, signal=24%	FZD4/NRP1/CDH2/SOX8/MARCKS/FYN/DRAXIN/ISL1/VCAN/HDAC1/ALDH1A2/NTRK2/PROX1/SIX3/CHD7	BP
GO:0045893	positive regulation of DNA-templated transcription	135	0.29868	1.29284	0.0643843	0.243896	0.200734	1757	tags=23%, list=14%, signal=20%	FOSL2/SOX11/FZD4/WWOX/TGFB3/GATA4/IRF8/NR2F2/SOX2/SSBP3/RBPMS2/NFKB1/GATA3/TBX3/FGFR1/NKX2-5/ISL1/REL/CNOT7/SETD3/RPS6KA1/ACTR2/GATA5/LBH/ADCYAP1/GATA2/CAPN3/HDAC1/INHBA/NFKB2/JUN	BP
GO:1902680	positive regulation of RNA biosynthetic process	135	0.29868	1.29284	0.0643843	0.243896	0.200734	1757	tags=23%, list=14%, signal=20%	FOSL2/SOX11/FZD4/WWOX/TGFB3/GATA4/IRF8/NR2F2/SOX2/SSBP3/RBPMS2/NFKB1/GATA3/TBX3/FGFR1/NKX2-5/ISL1/REL/CNOT7/SETD3/RPS6KA1/ACTR2/GATA5/LBH/ADCYAP1/GATA2/CAPN3/HDAC1/INHBA/NFKB2/JUN	BP
GO:0045944	positive regulation of transcription by RNA polymerase II	92	0.323945	1.32342	0.065154	0.245766	0.202273	2795	tags=34%, list=23%, signal=26%	FOSL2/SOX11/WWOX/GATA4/IRF8/SOX2/SSBP3/NFKB1/GATA3/NKX2-5/ISL1/REL/CNOT7/SETD3/ACTR2/GATA5/ADCYAP1/GATA2/HDAC1/INHBA/NFKB2/JUN/FOS/THRB/SIX3/CHD7/CHUK/MYOD1/MYSM1/IGF2/THRA	BP
GO:0032870	cellular response to hormone stimulus	32	0.423875	1.4104	0.065503	0.245766	0.202273	2883	tags=47%, list=23%, signal=36%	PCK2/JAK2/PRKAR1A/HDAC1/PCK1/MMP2/ESR2/THRB/PKLR/P2RY6/IGF2/THRA/GHR/AGTR1/MYO5A	BP
GO:0048699	generation of neurons	124	0.302909	1.2956	0.0660381	0.245766	0.202273	2530	tags=28%, list=21%, signal=23%	SOX11/FZD4/NRP1/GAP43/CDH2/EFNB1/SOX2/DISP3/NFASC/NTRK3/BSG/FYN/FAM206A/DRAXIN/GATA3/NKX2-5/ISL1/EPHA5/VCAN/ADCYAP1/MAPK4/HDAC1/TENM2/STMN2/ALDH1A2/NTRK2/STMN3/IRX4/FLRT3/FST/SIX3/SLC25A46/LLPH/CTNNA2/WNT9A	BP
GO:0051235	maintenance of location	28	0.439046	1.41689	0.0660543	0.245766	0.202273	2247	tags=39%, list=18%, signal=32%	TF/FTH1/ALB/LPL/NFKBIA/CACNA1C/SLC8B1/HSP90B1/CAPN3/RER1/CHD7	BP
GO:0050778	positive regulation of immune response	39	0.400085	1.39156	0.0662649	0.245766	0.202273	3930	tags=51%, list=32%, signal=35%	FOSL2/PTPRJ/LCK/GATA3/NFKBIA/PMS2/MYO1G/PCK1/TFRC/RIF1/CHUK/ADORA2B/COLEC11/TGFB2/CASP6/PLA2G4A/MBL2/FGR/RNF5/PIK3AP1	BP
GO:0040017	positive regulation of locomotion	36	0.408835	1.39619	0.0670695	0.245766	0.202273	789	tags=14%, list=6%, signal=13%	FZD4/VEGFA/NRP1/TGFB3/GATA3	BP
GO:2000147	positive regulation of cell motility	36	0.408835	1.39619	0.0670695	0.245766	0.202273	789	tags=14%, list=6%, signal=13%	FZD4/VEGFA/NRP1/TGFB3/GATA3	BP
GO:0007409	axonogenesis	53	0.368777	1.36652	0.0670772	0.245766	0.202273	940	tags=19%, list=8%, signal=18%	NRP1/GAP43/CDH2/EFNB1/NFASC/BSG/DRAXIN/GATA3/ISL1/EPHA5	BP
GO:0050877	nervous system process	41	0.394033	1.38526	0.068488	0.249911	0.205685	2795	tags=37%, list=23%, signal=28%	FZD4/TNNT3/CHRNG/EGFR/CHRNB2/TNNI2/GJB6/CHRND/NTRK2/VIP/CALB1/CHD7/CHRNA4/GABRQ/THRA	BP

## Sheet: LM
ID	Description	setSize	enrichmentScore	NES	pvalue	p.adjust	qvalue	rank	leading_edge	core_enrichment	ontology
GO:0006518	peptide metabolic process	97	-0.439081	-2.1149	7.57818e-07	0.000744935	0.000674059	3581	tags=47%, list=22%, signal=37%	METTL14/PAN2/MRPS7/EIF2A/EEF1A1/RPL27/WDR61/EARS2/QKI/EIF3E/RPL39L/RPL13/RPLP0/EIF2S3/NCBP1/RPL22/DNAJC3/RARS/EIF2S1/EIF4A2/PAIP2B/RPS13/FARSA/EIF3H/RPL15/METTL16/PSEN1/RPS15/EEF1B2/PSEN2/RPS12/EIF3M/UBA52/SPCS3/IARS2/CNBP/PUM1/MRPL51/LOC422214/RPS17/CARS/DENR/RPL36/RPL35/RPS4Y1/LTN1	BP
GO:0044085	cellular component biogenesis	300	-0.290696	-1.62935	2.04459e-06	0.00100492	0.000909305	3706	tags=39%, list=23%, signal=30%	TNFAIP1/TOM1/GREM1/MTPN/RPL7/CHAF1B/PAN2/MRPS7/CAV1/THY1/ARHGEF6/EIF2A/HCCS/FAM65B/SEMA4D/HSF3/HRAS/PDCD10/DIEXF/PNO1/NDC80/CPSF6/EIF3E/RAD51/CHMP4B/CDH13/TRIP13/MIS12/FOPNL/TGM2/ATF7IP/CENPT/UTP15/RAB11A/DR1/RPLP0/PAK1IP1/SNRPC/TGFBR2/TMEM237/EPHB2/EIF2S3/FAM175A/WIPI2/CHAF1A/GABRG2/TMEM41B/ZNF622/GTF2H5/MTERF3/TA3/CAPZB/ZFYVE27/DCAF13/PTGES3/MYH11/RPS13/CDC42/CENPO/FARSA/GJC3/TWF2/CTSD/DBN1/EIF…	BP
GO:0043043	peptide biosynthetic process	89	-0.433032	-2.05342	3.89327e-06	0.00109224	0.000988319	3581	tags=48%, list=22%, signal=38%	METTL14/PAN2/MRPS7/EIF2A/EEF1A1/RPL27/WDR61/EARS2/QKI/EIF3E/RPL39L/RPL13/RPLP0/EIF2S3/NCBP1/RPL22/DNAJC3/RARS/EIF2S1/EIF4A2/PAIP2B/RPS13/FARSA/EIF3H/RPL15/METTL16/RPS15/EEF1B2/RPS12/EIF3M/UBA52/IARS2/CNBP/PUM1/MRPL51/LOC422214/RPS17/CARS/DENR/RPL36/RPL35/RPS4Y1/LTN1	BP
GO:0006412	translation	88	-0.434881	-2.05858	4.44451e-06	0.00109224	0.000988319	3581	tags=49%, list=22%, signal=38%	METTL14/PAN2/MRPS7/EIF2A/EEF1A1/RPL27/WDR61/EARS2/QKI/EIF3E/RPL39L/RPL13/RPLP0/EIF2S3/NCBP1/RPL22/DNAJC3/RARS/EIF2S1/EIF4A2/PAIP2B/RPS13/FARSA/EIF3H/RPL15/METTL16/RPS15/EEF1B2/RPS12/EIF3M/UBA52/IARS2/CNBP/PUM1/MRPL51/LOC422214/RPS17/CARS/DENR/RPL36/RPL35/RPS4Y1/LTN1	BP
GO:0043604	amide biosynthetic process	100	-0.413114	-2.00069	5.7254e-06	0.00112561	0.00101852	3581	tags=53%, list=22%, signal=42%	RACK1/CELF2/CNOT10/RPL37A/AANAT/RPL5/METTL14/PAN2/MRPS7/EIF2A/EEF1A1/RPL27/WDR61/EARS2/DEGS1/QKI/EIF3E/RPL39L/RPL13/RPLP0/EIF2S3/NCBP1/RPL22/DNAJC3/RARS/EIF2S1/EIF4A2/PAIP2B/RPS13/FARSA/EIF3H/RPL15/SGMS1/METTL16/RPS15/EEF1B2/RPS12/EIF3M/UBA52/IARS2/CNBP/PUM1/MRPL51/ASNS/LOC422214/RPS17/CARS/DENR/RPL36/ORMDL2/RPL35/RPS4Y1/LTN1	BP
GO:0043603	amide metabolic process	118	-0.371564	-1.85135	1.56265e-05	0.00256014	0.00231656	3581	tags=42%, list=22%, signal=33%	METTL14/PAN2/MRPS7/EIF2A/EEF1A1/RPL27/WDR61/EARS2/DEGS1/QKI/EIF3E/RPL39L/RPL13/RPLP0/EIF2S3/NCBP1/RPL22/DNAJC3/RARS/EIF2S1/EIF4A2/PAIP2B/RPS13/FARSA/EIF3H/RPL15/SGMS1/METTL16/PSEN1/RPS15/EEF1B2/PSEN2/RPS12/EIF3M/UBA52/SPCS3/IARS2/CNBP/PUM1/MRPL51/ASNS/LOC422214/RPS17/CARS/DENR/RPL36/ORMDL2/RPL35/RPS4Y1/LTN1	BP
GO:0006396	RNA processing	99	-0.392927	-1.89953	2.28707e-05	0.0032117	0.00290612	3994	tags=48%, list=25%, signal=37%	CLP1/THADA/VWA9/RPL5/PSIP1/RBM22/METTL14/RPL7/PAN2/THOC5/BUD13/METTL2B/DIEXF/QKI/CPSF6/MAGOH/UTP15/SNRPC/NCBP1/MFAP1/CRIPT/DCAF13/RPS13/SSU72/KHDC4/INTS10/METTL16/SUPV3L1/INTS9/URM1/ELP3/TRMU/SBDS/XRN2/DDX1/PUM1/C1D/LOC422214/RPL7A/NOL11/TFIP11/PRKRIP1/PRPF3/ZRANB2/RPL35/STRAP/INTS2/SMU1	BP
GO:0022613	ribonucleoprotein complex biogenesis	60	-0.4753	-2.0908	2.72203e-05	0.00334469	0.00302647	3819	tags=63%, list=24%, signal=49%	RPL5/PSIP1/RPL7/MRPS7/EIF2A/DIEXF/PNO1/CPSF6/EIF3E/UTP15/RPLP0/PAK1IP1/SNRPC/EIF2S3/ZNF622/MTERF3/DCAF13/PTGES3/RPS13/EIF3H/DHX30/KHDC4/RAN/METTL16/RPS15/ERAL1/SBDS/RPS12/EIF3M/C1D/RPL7A/RPS17/NOL11/DENR/PRPF3/RPL35/STRAP/LSG1	BP
GO:0019538	protein metabolic process	460	-0.246374	-1.43462	3.21358e-05	0.00350994	0.00317599	3641	tags=37%, list=23%, signal=29%	GREM1/SKP1/HPSE/MTPN/ARPP19/PSMA1/METTL14/CYCS/BLMH/DOHH/AXIN1/PAN2/HSP90AA1/MRPS7/CAV1/THY1/MAGT1/ABHD17B/HMCES/EIF2A/HCCS/EEF1A1/CCNB3/CISH/DDB1/RPL27/CST3/MIB2/PIK3R5/DCUN1D1/CASP2/WDR61/HRAS/EARS2/PDCD10/ATG4A/POMK/KLHL20/DIEXF/QKI/ITGA1/EIF3E/DDA1/RAD51/MAEA/CCT7/ALAS1/TGM2/CHORDC1/TIMP2/RPL39L/HSP90AB1/CSK/CCND1/HS6ST2/DR1/RPL13/KLHL9/RPLP0/TGFBR2/EPHB2/TMEM208/EIF2S3/RBBP7/FAM175A/HS2ST1/A…	BP
GO:1903047	mitotic cell cycle process	71	-0.430122	-1.95193	5.52028e-05	0.00497034	0.00449745	3352	tags=44%, list=21%, signal=35%	DCTN2/CCNB3/CASP2/MRE11/NDC80/KIF4B/RAD51/CHMP4B/MIS12/CCND1/FAM175A/DCTN1/BRE/CCND2/CDC42/NBN/RAN/TIPIN/RTFDC1/NDEL1/CDCA9/SBDS/PAFAH1B1/MSH6/STMN1/ANAPC5/RB1/PSME3/ENSA/NSFL1C/CHMP2A	BP
GO:0000278	mitotic cell cycle	88	-0.400707	-1.89681	5.56193e-05	0.00497034	0.00449745	3352	tags=40%, list=21%, signal=32%	DCTN2/CCNB3/CASP2/TUBA8A/MRE11/NDC80/KIF4B/RAD51/CHMP4B/MIS12/CCND1/CENPT/FAM175A/DCTN1/BRE/CCND2/CDC42/NBN/RAN/TIPIN/RTFDC1/NDEL1/CDCA9/SBDS/ASNS/TUBB4B/PAFAH1B1/MSH6/STMN1/ANAPC5/RB1/PSME3/ENSA/NSFL1C/CHMP2A	BP
GO:0046907	intracellular transport	129	-0.338832	-1.71285	9.87502e-05	0.00808928	0.00731964	3193	tags=40%, list=20%, signal=32%	KDELR2/HRAS/PDCD10/KLHL20/RAB18/CPSF6/CHMP4B/COPB1/MYO1A/RAB11A/TMEM167A/DCTN1/NCBP1/WDR91/NXT2/BLOC1S5/HSPD1/YWHAB/TRAPPC3/CDC42/ZC3H11A/WLS/RAN/STRADA/PEX5/NSG1/AKTIP/RAB5B/RAB5C/PHAX/NDEL1/TBC1D23/TRAPPC5/PDLIM7/GOLGA7/SPCS3/SEC23B/VPS51/BCL2L1/TRAPPC2/LMNB2/PAFAH1B1/KIF1BP/VAMP7/CHP1/SCP2/ARCN1/NUP42/KPNA1/LSG1/CHMP2A	BP
GO:0043170	macromolecule metabolic process	868	-0.204714	-1.22846	0.000119896	0.00906599	0.00820341	3641	tags=35%, list=23%, signal=29%	TAF1B/RPL5/YWHAE/MPPE1/TCF12/PSPC1/USP7/SGK1/PSIP1/IL18/DNA2/TNFAIP1/ZBTB7A/CENPS/HOXA5/GREM1/SKP1/RBM22/HPSE/MTPN/ARPP19/RMI1/PSMA1/METTL14/RPL7/CYCS/BLMH/CHAF1B/DOHH/AXIN1/PAN2/HSP90AA1/HOXC8/HOXB1/MRPS7/CAV1/THY1/MAGT1/ABHD17B/THOC5/NCOA7/HMCES/EIF2A/BUD13/HCCS/EEF1A1/ARID5B/CCNB3/SBNO1/CISH/DDB1/RPL27/CST3/METTL2B/SEMA4D/MIB2/PIK3R5/DCUN1D1/AATF/CASP2/WDR61/HESX1/HSF3/HRAS/EARS2/PDCD10/IKZF1/…	BP
GO:0140014	mitotic nuclear division	25	-0.614831	-2.18974	0.000132555	0.00930726	0.00842173	2993	tags=44%, list=19%, signal=36%	NDC80/CHMP4B/MIS12/FAM175A/CDC42/RAN/NDEL1/CDCA9/ANAPC5/NSFL1C/CHMP2A	BP
GO:0051649	establishment of localization in cell	159	-0.306418	-1.59682	0.000173423	0.011365	0.0102837	3193	tags=36%, list=20%, signal=30%	KDELR2/HRAS/PDCD10/KLHL20/RAB18/NDC80/CPSF6/CHMP4B/COPB1/MIS12/MYO1A/RAB11A/TMEM167A/FAM175A/DCTN1/NCBP1/WDR91/NXT2/BLOC1S5/HSPD1/YWHAB/TRAPPC3/CDC42/ZC3H11A/YWHAZ/WLS/RAN/STRADA/PEX5/NSG1/AKTIP/RAB5B/RAB5C/PHAX/NDEL1/TBC1D23/TRAPPC5/PDLIM7/GOLGA7/SPCS3/TMEM230/SEC23B/VPS51/PDZD11/BCL2L1/TRAPPC2/LMNB2/PAFAH1B1/KIF1BP/VAMP7/CHP1/SCP2/ARCN1/NUP42/KPNA1/NSFL1C/LSG1/CHMP2A	BP
GO:0065003	protein-containing complex assembly	137	-0.320353	-1.63208	0.000268938	0.0163579	0.0148015	2948	tags=34%, list=18%, signal=28%	CPSF6/EIF3E/RAD51/MIS12/TGM2/CENPT/DR1/RPLP0/SNRPC/EIF2S3/CHAF1A/GTF2H5/CAPZB/PTGES3/MYH11/CDC42/CENPO/FARSA/TWF2/DBN1/EIF3H/HOPX/APIP/ADRM1/KHDC4/KCNJ2/NSG1/CSNK1A1/RPS15/TMEM70/ERAL1/NDEL1/VMA21/EIF3M/APOA1/CENPN/PRNP/TFIP11/HP1BP3/DENR/STMN1/PRPF3/STRAP/PDIA3/TAPBP/SMARCB1	BP
GO:0006996	organelle organization	321	-0.250848	-1.41637	0.000282893	0.0163579	0.0148015	3153	tags=31%, list=19%, signal=25%	HRAS/TUBA8A/PDCD10/XRCC6/DYM/MRE11/RAB18/NDC80/KIF4B/RAD51/CHMP4B/ACTR6/TRIP13/MAEA/MIS12/FOPNL/CHORDC1/ATF7IP/BRIP1/MYO1A/CENPT/RAB11A/RPLP0/TGFBR2/TMEM237/FAM175A/WIPI2/DCTN1/CRIPT/TMEM41B/HSPD1/MTERF3/TA3/APOOL/ANXA1/CAPZB/ZFYVE27/BID/PTGES3/LYSMD3/MYH11/MCM8/FEN1/CDC42/CENPO/TWF2/CTSD/DBN1/YWHAZ/DHX30/NBN/RAB33B/PHB2/SEPTIN2L/RAN/PEX5/AKTIP/SUPV3L1/CSNK1A1/CALD1/RPS15/RPA1/TMEM70/PI4K2B/ERAL1…	BP
GO:0001666	response to hypoxia	18	0.688699	1.93373	0.000392624	0.019468	0.0176158	2997	tags=56%, list=19%, signal=45%	FZD4/HYOU1/VEGFA/TGFB3/FOSL2/CHRNB2/BCL2/LOXL2/TGFB2/PCK1	BP
GO:0036293	response to decreased oxygen levels	18	0.688699	1.93373	0.000392624	0.019468	0.0176158	2997	tags=56%, list=19%, signal=45%	FZD4/HYOU1/VEGFA/TGFB3/FOSL2/CHRNB2/BCL2/LOXL2/TGFB2/PCK1	BP
GO:0022607	cellular component assembly	267	-0.262461	-1.45399	0.000402535	0.019468	0.0176158	3820	tags=37%, list=24%, signal=29%	TAF1B/RPL5/PSIP1/TNFAIP1/TOM1/GREM1/MTPN/CHAF1B/PAN2/MRPS7/CAV1/THY1/ARHGEF6/EIF2A/HCCS/FAM65B/SEMA4D/HSF3/HRAS/PDCD10/NDC80/CPSF6/EIF3E/RAD51/CHMP4B/CDH13/TRIP13/MIS12/FOPNL/TGM2/CENPT/RAB11A/DR1/RPLP0/SNRPC/TGFBR2/TMEM237/EPHB2/EIF2S3/FAM175A/WIPI2/CHAF1A/GABRG2/TMEM41B/GTF2H5/MTERF3/TA3/CAPZB/ZFYVE27/PTGES3/MYH11/CDC42/CENPO/FARSA/GJC3/TWF2/CTSD/DBN1/EIF3H/HOPX/YWHAZ/APIP/ADRM1/KHDC4/RAB33B/SE…	BP
GO:0034660	ncRNA metabolic process	60	-0.430926	-1.8956	0.000415899	0.019468	0.0176158	1861	tags=37%, list=12%, signal=33%	DCAF13/RARS/FARSA/INTS10/METTL16/PRL/OCLN/INTS9/URM1/ELP3/TRMU/SBDS/DDX1/IARS2/PUM1/C1D/RPL7A/CARS/NOL11/RPL35/INTS2/SMARCB1	BP
GO:0042254	ribosome biogenesis	38	-0.497866	-1.97385	0.000500987	0.0217567	0.0196867	3573	tags=66%, list=22%, signal=51%	RPL7/MRPS7/EIF2A/DIEXF/PNO1/UTP15/RPLP0/PAK1IP1/ZNF622/MTERF3/DCAF13/RPS13/DHX30/RAN/METTL16/RPS15/ERAL1/SBDS/RPS12/C1D/RPL7A/RPS17/NOL11/RPL35/LSG1	BP
GO:0071495	cellular response to endogenous stimulus	124	0.411922	1.64488	0.000521921	0.0217567	0.0196867	3808	tags=40%, list=24%, signal=30%	FZD4/WWOX/GHR/ACAP2/PCK2/NRP1/VEGFA/SPRY2/TGFB3/ZYX/ATVR1/FGFRL1/NTRK3/RGMA/WNT3A/ESR2/RBPMS2/THRA/PRLR/CAPN2/FGF4/P2RY6/GPC1/AGTR1/NTRK2/BMPR1B/TGFB2/STMN2/JAK2/PRKAR1A/FGFR3/FGFR1/LHCGR/PCK1/CHRM2/WNT1/RAB14/FGFR2/IGF2/RARB/FOS/MSX1/HDAC1/GLG1/PKLR/SMAD3/EGFR/CEBPB/THRB	BP
GO:0007167	enzyme-linked receptor protein signaling pathway	107	0.425081	1.66774	0.00053119	0.0217567	0.0196867	3681	tags=40%, list=23%, signal=31%	FZD4/GHR/EFNB1/NRP1/FYN/VEGFA/SPRY2/NPPA/PTPRJ/TGFB3/MVB12A/ZYX/ATVR1/FGFRL1/GFRA2/NTRK3/RGMA/WNT3A/LCK/PDGFC/RBPMS2/FGF4/GPC1/NTRK2/BMPR1B/EPHA7/TGFB2/JAK2/FGFR3/YES1/FGFR1/WNT1/MUSK/RAB14/EFNA5/FGFR2/IGF2/FOS/GFRA4/MSX1/GLG1/SMAD3/EGFR	BP
GO:0070482	response to oxygen levels	19	0.669884	1.90401	0.000579425	0.022783	0.0206153	2997	tags=53%, list=19%, signal=43%	FZD4/HYOU1/VEGFA/TGFB3/FOSL2/CHRNB2/BCL2/LOXL2/TGFB2/PCK1	BP
GO:0007169	transmembrane receptor protein tyrosine kinase signaling pathway	69	0.468764	1.72744	0.000832874	0.0309433	0.0279993	3383	tags=42%, list=21%, signal=33%	FZD4/GHR/EFNB1/NRP1/FYN/VEGFA/SPRY2/PTPRJ/MVB12A/FGFRL1/GFRA2/NTRK3/WNT3A/LCK/PDGFC/FGF4/GPC1/NTRK2/EPHA7/JAK2/FGFR3/YES1/FGFR1/MUSK/RAB14/EFNA5/FGFR2/IGF2/GFRA4	BP
GO:0009719	response to endogenous stimulus	143	0.393032	1.59517	0.000869934	0.0309433	0.0279993	3808	tags=38%, list=24%, signal=30%	FZD4/WWOX/GHR/ACAP2/PCK2/NRP1/VEGFA/SPRY2/TGFB3/ZYX/FOSL2/ATVR1/FGFRL1/NTRK3/LPL/RGMA/WNT3A/ESR2/RBPMS2/THRA/PRLR/BCL2/CAPN2/FGF4/P2RY6/GPC1/NKX2-5/AGTR1/NTRK2/BMPR1B/SPINK5/TGFB2/STMN2/JAK2/PRKAR1A/FGFR3/FGFR1/LHCGR/PCK1/CHRM2/WNT1/RAB14/FGFR2/IGF2/RARB/FOS/MSX1/HDAC1/GLG1/DISP3/PKLR/SMAD3/EGFR/CEBPB/THRB	BP
GO:0061024	membrane organization	60	-0.414366	-1.82275	0.000881397	0.0309433	0.0279993	798	tags=23%, list=5%, signal=22%	GET4/APOA1/SEC23B/BCL2L1/PRNP/LMNB2/PAFAH1B1/PRELID1/VAMP7/TLCD1/CHP1/SH3GLB1/NSFL1C/CHMP2A	BP
GO:1901564	organonitrogen compound metabolic process	559	-0.216203	-1.27196	0.00102216	0.034542	0.0312556	3641	tags=34%, list=23%, signal=27%	GREM1/SKP1/HPSE/MTPN/ARPP19/PSMA1/METTL14/CYCS/BLMH/DOHH/AXIN1/PAN2/HSP90AA1/MRPS7/CAV1/THY1/MAGT1/ABHD17B/HMCES/EIF2A/HCCS/EEF1A1/CCNB3/CISH/DDB1/RPL27/CST3/MIB2/PIK3R5/DCUN1D1/CASP2/WDR61/HRAS/EARS2/PDCD10/ATG4A/POMK/KLHL20/DIEXF/DEGS1/QKI/ITGA1/EIF3E/DDA1/RAD51/SAT1/MAEA/CCT7/ALAS1/TGM2/CHORDC1/TIMP2/RPL39L/HSP90AB1/CSK/CCND1/HS6ST2/ABHD12/DR1/RPL13/KLHL9/RPLP0/TGFBR2/EPHB2/TMEM208/EIF2S3/RBBP…	BP
GO:0008104	protein localization	192	-0.278288	-1.47915	0.00108938	0.034542	0.0312556	3193	tags=34%, list=20%, signal=27%	KDELR2/HRAS/PDCD10/ATG4A/KLHL20/DIEXF/RAB18/TIMM9/DDX42/EPB41/CHMP4B/COPB1/RAB11A/TGFBR2/TMEM167A/WIPI2/DCTN1/NXT2/CDK9/HSPD1/YWHAB/ZFYVE27/AACS/ANKRD52/CDC42/PGRMC1/TWF2/CTSD/YWHAZ/RAB33B/WLS/RAN/STRADA/PEX5/NSG1/AKTIP/RAB5B/RAB5C/PHAX/RPA1/TLDC1/SDC4/GET4/PDLIM7/GOLGA7/SPCS3/SEC23B/VPS51/PDZD11/BCL2L1/PRNP/LMNB2/PAFAH1B1/LMBRD1/VAMP7/TERF2/CHP1/ARCN1/ENSA/NUP42/KPNA1/NSFL1C/ACTN4/LSG1/CHMP2A	BP
GO:0070727	cellular macromolecule localization	192	-0.278288	-1.47915	0.00108938	0.034542	0.0312556	3193	tags=34%, list=20%, signal=27%	KDELR2/HRAS/PDCD10/ATG4A/KLHL20/DIEXF/RAB18/TIMM9/DDX42/EPB41/CHMP4B/COPB1/RAB11A/TGFBR2/TMEM167A/WIPI2/DCTN1/NXT2/CDK9/HSPD1/YWHAB/ZFYVE27/AACS/ANKRD52/CDC42/PGRMC1/TWF2/CTSD/YWHAZ/RAB33B/WLS/RAN/STRADA/PEX5/NSG1/AKTIP/RAB5B/RAB5C/PHAX/RPA1/TLDC1/SDC4/GET4/PDLIM7/GOLGA7/SPCS3/SEC23B/VPS51/PDZD11/BCL2L1/PRNP/LMNB2/PAFAH1B1/LMBRD1/VAMP7/TERF2/CHP1/ARCN1/ENSA/NUP42/KPNA1/NSFL1C/ACTN4/LSG1/CHMP2A	BP
GO:0070848	response to growth factor	70	0.461126	1.70356	0.00112446	0.034542	0.0312556	3681	tags=44%, list=23%, signal=34%	FZD4/WWOX/ACAP2/NRP1/VEGFA/SPRY2/TGFB3/ZYX/ATVR1/FGFRL1/NTRK3/RGMA/WNT3A/RBPMS2/FGF4/GPC1/NKX2-5/NTRK2/BMPR1B/TGFB2/STMN2/FGFR3/FGFR1/WNT1/RAB14/FGFR2/FOS/MSX1/GLG1/SMAD3/EGFR	BP
GO:0044238	primary metabolic process	982	-0.19368	-1.16911	0.00119571	0.0356178	0.032229	3641	tags=32%, list=23%, signal=27%	GREM1/SKP1/RBM22/HPSE/MTPN/ARPP19/RMI1/PSMA1/METTL14/RPL7/CYCS/BLMH/CHAF1B/DOHH/PGAM1/AXIN1/PAN2/HSP90AA1/HOXC8/HOXB1/MRPS7/CAV1/THY1/MAGT1/ABHD17B/THOC5/NCOA7/HMCES/EIF2A/BUD13/HCCS/EEF1A1/ARID5B/FAM126A/CCNB3/SBNO1/CISH/DDB1/CYP17A1/RPL27/CST3/METTL2B/SEMA4D/MIB2/PIK3R5/DCUN1D1/AATF/CASP2/WDR61/HESX1/HSF3/HRAS/EARS2/PDCD10/IKZF1/ATG4A/POMK/KLHL20/DIEXF/DEGS1/XRCC6/MRE11/NFYB/QKI/MYF5/CPSF6/ITGA…	BP
GO:1901566	organonitrogen compound biosynthetic process	194	-0.269609	-1.43525	0.00135177	0.0390643	0.0353475	3507	tags=36%, list=22%, signal=28%	PAN2/MRPS7/MAGT1/EIF2A/EEF1A1/RPL27/WDR61/EARS2/POMK/DEGS1/QKI/EIF3E/SAT1/ALAS1/RPL39L/HS6ST2/RPL13/RPLP0/EIF2S3/HS2ST1/WIPI2/NCBP1/RPL22/DNAJC3/ADSL/AK1/GXYLT1/EOGT/RARS/EIF2S1/EIF4A2/PAIP2B/RPS13/PGRMC1/FARSA/EIF3H/RPL15/APIP/SGMS1/METTL16/RPS15/TMLHE/EEF1B2/DAD1/CKMT2/RPS12/EIF3M/ADI1/GOLGA7/APOA1/UBA52/CKB/IARS2/CNBP/CHPT1/PUM1/MRPL51/ASNS/CMPK1/LOC422214/RPS17/CARS/DENR/RPL36/ORMDL2/CHP1/RPL…	BP
GO:1902850	microtubule cytoskeleton organization involved in mitosis	21	-0.578424	-1.96398	0.0014299	0.0390643	0.0353475	3352	tags=48%, list=21%, signal=38%	DCTN2/NDC80/KIF4B/FAM175A/DCTN1/NDEL1/SBDS/PAFAH1B1/STMN1/NSFL1C	BP
GO:0060070	canonical Wnt signaling pathway	39	0.534068	1.77925	0.00143063	0.0390643	0.0353475	3747	tags=51%, list=23%, signal=39%	FZD1/SOX11/FZD4/LRP1/CDH2/STK11/FZD2/WNT3A/DKK3/GSKIP/WNT11/NKX2-5/FRZB/SFRP2/WNT1/SFRP1/HDAC1/PTK7/WNT7B/DRAXIN	BP
GO:0071826	protein-RNA complex organization	28	-0.526569	-1.9335	0.00148588	0.0394763	0.0357204	4138	tags=71%, list=26%, signal=53%	CELF2/CLP1/RPL5/PSIP1/MRPS7/CPSF6/EIF3E/RPLP0/SNRPC/EIF2S3/PTGES3/EIF3H/KHDC4/RPS15/ERAL1/EIF3M/TFIP11/DENR/PRPF3/STRAP	BP
GO:0022402	cell cycle process	117	-0.312913	-1.55585	0.00153773	0.0397787	0.035994	3715	tags=44%, list=23%, signal=34%	DNA2/CENPS/ARPP19/RMI1/HSP90AA1/THOC5/DCTN2/CCNB3/CASP2/HSF3/MRE11/NDC80/KIF4B/RAD51/CHMP4B/TRIP13/MIS12/CHORDC1/CCND1/BRIP1/CENPT/KLHL9/FAM175A/DCTN1/BRE/CCND2/FEN1/CDC42/NBN/SEPTIN2L/RAN/TIPIN/RTFDC1/NDEL1/UFL1/CDCA9/SBDS/CENPN/RAD54L/BCL2L1/MDM1/PAFAH1B1/MSH6/TOP2A/STMN1/ANAPC5/RB1/PSME3/ENSA/NSFL1C/CHMP2A	BP
GO:0071840	cellular component organization or biogenesis	653	-0.203419	-1.20708	0.00166425	0.0418892	0.0379037	3160	tags=27%, list=20%, signal=22%	HSF3/HRAS/TUBA8A/PDCD10/DIEXF/PNO1/DEGS1/XRCC6/DYM/MRE11/RAB18/NDC80/CPSF6/KIF4B/EIF3E/RAD51/CHMP4B/ACTR6/ING4/CDH13/TRIP13/MAEA/MIS12/NCAM1/FOPNL/TGM2/CHORDC1/CSK/ATF7IP/BRIP1/MYO1A/CENPT/UTP15/RAB11A/DR1/RPLP0/PAK1IP1/HMGN1/SNRPC/TGFBR2/TMEM237/EPHB2/EIF2S3/RBBP7/FAM175A/WIPI2/DCTN1/CCDC80/CRIPT/CHAF1A/GABRG2/TMEM41B/ZNF622/GTF2H5/HSPD1/MTERF3/TA3/SMYD2/APOOL/BRE/ANXA1/CAPZB/ZFYVE27/BID/DCAF13/…	BP
GO:0071363	cellular response to growth factor stimulus	68	0.458508	1.68602	0.00170594	0.0418892	0.0379037	3681	tags=44%, list=23%, signal=34%	FZD4/WWOX/ACAP2/NRP1/VEGFA/SPRY2/TGFB3/ZYX/ATVR1/FGFRL1/NTRK3/RGMA/WNT3A/RBPMS2/FGF4/GPC1/NTRK2/BMPR1B/TGFB2/STMN2/FGFR3/FGFR1/WNT1/RAB14/FGFR2/FOS/MSX1/GLG1/SMAD3/EGFR	BP
GO:0007049	cell cycle	180	-0.279961	-1.47798	0.00174716	0.0418892	0.0379037	3715	tags=41%, list=23%, signal=32%	DNA2/CENPS/ARPP19/RMI1/CHAF1B/HSP90AA1/THOC5/DCTN2/CCNB3/CASP2/HSF3/HRAS/TUBA8A/MRE11/NDC80/EPB41/KIF4B/RAD51/CHMP4B/ING4/TRIP13/MAEA/MIS12/CHORDC1/HSP90AB1/CCND1/BRIP1/CENPT/RAB11A/DR1/KLHL9/FAM175A/DCTN1/CHAF1A/CDK9/BRE/SPIN1/CCND2/FEN1/CDC42/NBN/SEPTIN2L/RAN/STRADA/TIPIN/CSNK1A1/RPA1/RTFDC1/NDEL1/CCPG1/UFL1/CDCA9/SBDS/BIRC2/APOA1/CENPN/RAD54L/PUM1/ASNS/BCL2L1/TUBB4B/MDM1/PAFAH1B1/MSH6/TOP2A/ST…	BP
GO:0007166	cell surface receptor signaling pathway	247	0.345642	1.47331	0.00180209	0.0421774	0.0381645	3747	tags=33%, list=23%, signal=26%	FZD1/SOX11/FZD4/WWOX/GHR/LRP1/EFNB1/NRP1/PTCH1/FYN/VEGFA/SPRY2/CDH6/NPPA/PTPRJ/CDH2/TGFB3/STK11/MVB12A/TSPAN12/ZYX/FOSL2/ATVR1/FGFRL1/NKIRAS2/GFRA2/NTRK3/RGMA/CHRNB2/ITGAV/LFNG/FZD2/BCL2L10/WNT3A/DKK3/LCK/APCDD1/CHUK/PDGFC/GSKIP/ADORA2B/RBPMS2/GLI2/PRLR/CNTF/BCL2/SIX3/FGF4/P2RY6/WNT11/GPC1/NKX2-5/NTRK2/BMPR1B/EPHA7/TGFB2/JAK2/FGFR3/YES1/SEMA3A/FGFR1/FRZB/SFRP2/WNT1/MUSK/RAB14/NFKBIA/EFNA5/FGFR2/I…	BP
GO:0033036	macromolecule localization	236	-0.255342	-1.39397	0.00198214	0.0453126	0.0410014	3458	tags=35%, list=21%, signal=28%	ABHD17B/THOC5/FAM53A/FAM126A/FAM65B/CRABP1/KDELR2/HRAS/PDCD10/ATG4A/KLHL20/DIEXF/RAB18/QKI/TIMM9/DDX42/EPB41/CPSF6/MAGOH/CHMP4B/COPB1/RAB11A/TGFBR2/TMEM167A/WIPI2/VLDLR/DCTN1/NCBP1/NXT2/CDK9/TMEM41B/HSPD1/YWHAB/ZFYVE27/AACS/ANKRD52/CDC42/PGRMC1/TWF2/CTSD/ZC3H11A/YWHAZ/RAB33B/WLS/RAN/STRADA/PEX5/NSG1/AKTIP/RAB5B/RAB5C/PHAX/RPA1/TLDC1/SDC4/GET4/PDLIM7/GOLGA7/APOA1/SPCS3/SEC23B/VPS51/PDZD11/BCL2L1/L…	BP
GO:0006807	nitrogen compound metabolic process	935	-0.192803	-1.17088	0.00203887	0.0454597	0.0411345	3641	tags=32%, list=23%, signal=27%	GREM1/SKP1/RBM22/HPSE/MTPN/ARPP19/RMI1/PSMA1/METTL14/RPL7/CYCS/BLMH/CHAF1B/DOHH/AXIN1/PAN2/HSP90AA1/HOXC8/HOXB1/MRPS7/CAV1/THY1/MAGT1/ABHD17B/THOC5/NCOA7/HMCES/EIF2A/BUD13/HCCS/EEF1A1/ARID5B/CCNB3/SBNO1/CISH/DDB1/RPL27/CST3/METTL2B/SEMA4D/MIB2/PIK3R5/DCUN1D1/AATF/CASP2/WDR61/HESX1/HSF3/HRAS/EARS2/PDCD10/IKZF1/ATG4A/POMK/KLHL20/DIEXF/DEGS1/XRCC6/MRE11/NFYB/QKI/MYF5/CPSF6/ITGA1/MAGOH/IRF2/EIF3E/DDA…	BP
GO:0006399	tRNA metabolic process	18	-0.595028	-1.92573	0.00208107	0.0454597	0.0411345	3994	tags=67%, list=25%, signal=50%	CLP1/THADA/METTL2B/EARS2/RARS/FARSA/URM1/ELP3/TRMU/DDX1/IARS2/CARS	BP
GO:0002520	immune system development	18	0.64559	1.81269	0.00222487	0.0475445	0.043021	3143	tags=67%, list=19%, signal=54%	REV1/TGFB3/RAG2/CCNB1/BCL2/PMS2/LIG4/NKX2-5/BCL6/TGFB2/PRKDC/TFRC	BP
GO:0022618	protein-RNA complex assembly	27	-0.511972	-1.86148	0.0024748	0.0517603	0.0468356	4138	tags=70%, list=26%, signal=52%	CELF2/CLP1/RPL5/PSIP1/MRPS7/CPSF6/EIF3E/RPLP0/SNRPC/EIF2S3/PTGES3/EIF3H/KHDC4/RPS15/ERAL1/EIF3M/DENR/PRPF3/STRAP	BP
GO:0045184	establishment of protein localization	123	-0.295386	-1.48092	0.00283972	0.0581552	0.0526221	3193	tags=36%, list=20%, signal=29%	KDELR2/HRAS/PDCD10/ATG4A/KLHL20/RAB18/TIMM9/CHMP4B/COPB1/RAB11A/TGFBR2/TMEM167A/DCTN1/NXT2/HSPD1/YWHAB/AACS/CTSD/RAB33B/WLS/RAN/STRADA/PEX5/NSG1/AKTIP/RAB5B/RAB5C/PHAX/GET4/GOLGA7/SPCS3/SEC23B/VPS51/PRNP/PAFAH1B1/VAMP7/CHP1/ARCN1/ENSA/NUP42/KPNA1/ACTN4/LSG1/CHMP2A	BP
GO:0051276	chromosome organization	60	-0.379025	-1.66729	0.00316011	0.0633957	0.057364	3073	tags=45%, list=19%, signal=37%	XRCC6/MRE11/NDC80/RAD51/TRIP13/MIS12/ATF7IP/BRIP1/CENPT/FAM175A/PTGES3/MCM8/FEN1/CENPO/DHX30/NBN/RAN/SUPV3L1/RPA1/CDCA9/DDX1/CENPN/HMGB3/TOP2A/ANAPC5/TERF2/HMGB2	BP
GO:0034470	ncRNA processing	41	-0.432483	-1.74558	0.00396428	0.0779377	0.0705225	1396	tags=56%, list=9%, signal=51%	CLP1/THADA/VWA9/RPL5/RPL7/METTL2B/DIEXF/UTP15/DCAF13/INTS10/METTL16/INTS9/URM1/ELP3/TRMU/SBDS/DDX1/PUM1/C1D/RPL7A/NOL11/RPL35/INTS2	BP
GO:0051641	cellular localization	266	-0.237933	-1.31642	0.00462148	0.0890767	0.0806016	3193	tags=31%, list=20%, signal=25%	KDELR2/HRAS/PDCD10/ATG4A/KLHL20/DIEXF/RAB18/TIMM9/NDC80/DDX42/EPB41/CPSF6/CHMP4B/COPB1/MIS12/MYO1A/RAB11A/TGFBR2/TMEM167A/FAM175A/WIPI2/DCTN1/NCBP1/WDR91/NXT2/BLOC1S5/CDK9/HSPD1/YWHAB/CASQ2/ZFYVE27/AACS/ANKRD52/TRAPPC3/CDC42/PGRMC1/TWF2/CTSD/ZC3H11A/YWHAZ/RAB33B/WLS/RAN/STRADA/PEX5/NSG1/AKTIP/RAB5B/RAB5C/PHAX/RPA1/TLDC1/NDEL1/SDC4/TBC1D23/TRAPPC5/GET4/PDLIM7/GOLGA7/SPCS3/TMEM230/SEC23B/VPS51/PDZD…	BP
GO:0016072	rRNA metabolic process	19	-0.557112	-1.83616	0.00490829	0.0924637	0.0836664	4394	tags=79%, list=27%, signal=58%	DKC1/FTSJ3/TAF1B/RPL5/RPL7/DIEXF/UTP15/DCAF13/METTL16/SBDS/C1D/RPL7A/NOL11/RPL35/SMARCB1	BP
GO:0008380	RNA splicing	51	-0.390307	-1.65697	0.00510979	0.0924637	0.0836664	4138	tags=45%, list=26%, signal=34%	CELF2/CLP1/PSIP1/RBM22/METTL14/THOC5/BUD13/QKI/MAGOH/SNRPC/NCBP1/MFAP1/CRIPT/RPS13/KHDC4/METTL16/DDX1/LOC422214/TFIP11/PRKRIP1/PRPF3/STRAP/SMU1	BP
GO:0006913	nucleocytoplasmic transport	26	-0.492942	-1.77364	0.00517345	0.0924637	0.0836664	3454	tags=58%, list=21%, signal=45%	YWHAE/THOC5/FAM53A/CPSF6/NCBP1/NXT2/ZC3H11A/RAN/STRADA/PHAX/PDLIM7/CHP1/NUP42/KPNA1/LSG1	BP
GO:0051169	nuclear transport	26	-0.492942	-1.77364	0.00517345	0.0924637	0.0836664	3454	tags=58%, list=21%, signal=45%	YWHAE/THOC5/FAM53A/CPSF6/NCBP1/NXT2/ZC3H11A/RAN/STRADA/PHAX/PDLIM7/CHP1/NUP42/KPNA1/LSG1	BP
GO:0015031	protein transport	117	-0.28834	-1.43367	0.00658159	0.113689	0.102872	3193	tags=35%, list=20%, signal=28%	KDELR2/HRAS/PDCD10/ATG4A/KLHL20/RAB18/TIMM9/CHMP4B/COPB1/RAB11A/TGFBR2/TMEM167A/DCTN1/NXT2/HSPD1/YWHAB/AACS/RAB33B/WLS/RAN/STRADA/PEX5/NSG1/AKTIP/RAB5B/RAB5C/PHAX/GOLGA7/SPCS3/SEC23B/VPS51/PAFAH1B1/VAMP7/CHP1/ARCN1/ENSA/NUP42/KPNA1/ACTN4/LSG1/CHMP2A	BP
GO:0046165	alcohol biosynthetic process	17	0.61985	1.71393	0.00659234	0.113689	0.102872	2997	tags=59%, list=19%, signal=48%	PCK2/PGP/FDPS/GCH1/MOXD1/PCBD1/PCBD2/P2RY6/LHCGR/PCK1	BP
GO:0007346	regulation of mitotic cell cycle	28	-0.475096	-1.74449	0.00681332	0.115354	0.104379	3207	tags=50%, list=20%, signal=40%	CASP2/MRE11/NDC80/CCND1/FAM175A/BRE/CDC42/NBN/TIPIN/ASNS/MSH6/ANAPC5/RB1/PSME3	BP
GO:0016055	Wnt signaling pathway	57	0.447347	1.59673	0.00704571	0.115354	0.104379	3747	tags=40%, list=23%, signal=31%	FZD1/SOX11/FZD4/WWOX/LRP1/CDH2/STK11/FZD2/WNT3A/DKK3/APCDD1/GSKIP/SIX3/WNT11/NKX2-5/FRZB/SFRP2/WNT1/SFRP1/HDAC1/PTK7/WNT7B/DRAXIN	BP
GO:0198738	cell-cell signaling by wnt	57	0.447347	1.59673	0.00704571	0.115354	0.104379	3747	tags=40%, list=23%, signal=31%	FZD1/SOX11/FZD4/WWOX/LRP1/CDH2/STK11/FZD2/WNT3A/DKK3/APCDD1/GSKIP/SIX3/WNT11/NKX2-5/FRZB/SFRP2/WNT1/SFRP1/HDAC1/PTK7/WNT7B/DRAXIN	BP
GO:0031331	positive regulation of cellular catabolic process	17	-0.566772	-1.80508	0.00724615	0.115354	0.104379	4537	tags=53%, list=28%, signal=38%	AGO3/WDR24/TOM1/METTL14/PAN2/METTL16/SUPV3L1/UFL1/PUM1	BP
GO:0006397	mRNA processing	59	-0.359263	-1.57386	0.00727563	0.115354	0.104379	3750	tags=41%, list=23%, signal=31%	PSIP1/RBM22/METTL14/PAN2/THOC5/BUD13/QKI/CPSF6/MAGOH/SNRPC/NCBP1/MFAP1/CRIPT/SSU72/KHDC4/METTL16/XRN2/DDX1/LOC422214/TFIP11/PRKRIP1/PRPF3/STRAP/SMU1	BP
GO:0051726	regulation of cell cycle	78	-0.327247	-1.51337	0.00772087	0.12047	0.109008	3506	tags=47%, list=22%, signal=37%	HSP90AA1/THOC5/CCNB3/CASP2/HSF3/HRAS/MRE11/NDC80/TRIP13/CHORDC1/HSP90AB1/CCND1/DR1/KLHL9/FAM175A/DCTN1/CDK9/BRE/CCND2/FEN1/CDC42/NBN/TIPIN/CCPG1/UFL1/BIRC2/APOA1/PUM1/ASNS/BCL2L1/MDM1/MSH6/ANAPC5/RB1/PSME3/NSFL1C/CSNK2A1	BP
GO:0000280	nuclear division	39	-0.415172	-1.65688	0.00791481	0.121567	0.11	2993	tags=41%, list=19%, signal=34%	NDC80/RAD51/CHMP4B/TRIP13/MIS12/BRIP1/FAM175A/CDC42/RAN/NDEL1/CDCA9/RAD54L/TOP2A/ANAPC5/NSFL1C/CHMP2A	BP
GO:0043933	protein-containing complex organization	224	-0.240619	-1.30302	0.00887372	0.134198	0.12143	2884	tags=28%, list=18%, signal=23%	EIF3E/RAD51/ING4/MIS12/TGM2/ATF7IP/CENPT/DR1/RPLP0/HMGN1/SNRPC/EIF2S3/RBBP7/FAM175A/CHAF1A/GTF2H5/SMYD2/BRE/CAPZB/PTGES3/EEF1AKMT1/MYH11/KDM5B/CDC42/CENPO/FARSA/TWF2/DBN1/EIF3H/HOPX/APIP/ADRM1/KHDC4/PEX5/KCNJ2/NSG1/CSNK1A1/RPS15/TMEM70/ERAL1/NDEL1/VMA21/EIF3M/APOA1/CENPN/RAD54L/PRNP/RPS6KA5/LMNB2/DSTN/TFIP11/HP1BP3/DENR/MIER1/STMN1/SETD1A/PRPF3/RB1/STRAP/PDIA3/TAPBP/SMYD5/SMARCB1	BP
GO:0016051	carbohydrate biosynthetic process	21	0.573827	1.67071	0.00910911	0.135671	0.122762	3340	tags=52%, list=21%, signal=42%	PCK2/CHST10/PGP/ALDOB/RGN/P2RY6/PGK2/DYRK2/LHCGR/PCK1/HAGH	BP
GO:0051607	defense response to virus	16	-0.569285	-1.78137	0.0094407	0.13571	0.122798	2002	tags=31%, list=12%, signal=27%	GH/IFNLR1/CSNK1A1/IRF7/BCL2L1	BP
GO:0140546	defense response to symbiont	16	-0.569285	-1.78137	0.0094407	0.13571	0.122798	2002	tags=31%, list=12%, signal=27%	GH/IFNLR1/CSNK1A1/IRF7/BCL2L1	BP
GO:0051168	nuclear export	19	-0.532143	-1.75387	0.00952596	0.13571	0.122798	3804	tags=63%, list=24%, signal=48%	YWHAE/THOC5/CPSF6/NCBP1/NXT2/ZC3H11A/RAN/STRADA/PHAX/CHP1/NUP42/LSG1	BP
GO:0032392	DNA geometric change	17	-0.553357	-1.76235	0.00995558	0.139805	0.126503	3073	tags=65%, list=19%, signal=52%	XRCC6/RAD51/BRIP1/MCM8/DHX30/NBN/SUPV3L1/DDX1/HMGB3/TOP2A/HMGB2	BP
GO:0071705	nitrogen compound transport	149	-0.263737	-1.36028	0.0103958	0.143931	0.130237	3193	tags=33%, list=20%, signal=27%	KDELR2/HRAS/PDCD10/ATG4A/KLHL20/RAB18/QKI/TIMM9/CPSF6/MAGOH/CHMP4B/COPB1/RAB11A/TGFBR2/TMEM167A/DCTN1/NCBP1/NXT2/HSPD1/YWHAB/AACS/GRP/ZC3H11A/RAB33B/WLS/RAN/STRADA/PEX5/NSG1/AKTIP/RAB5B/RAB5C/PHAX/SLC48A1/GOLGA7/SPCS3/SEC23B/VPS51/LOC422214/PAFAH1B1/VAMP7/CHP1/ARCN1/ENSA/NUP42/KPNA1/ACTN4/LSG1/CHMP2A	BP
GO:0010498	proteasomal protein catabolic process	36	-0.413006	-1.61837	0.0120582	0.164628	0.148965	3706	tags=58%, list=23%, signal=45%	HSPA5/PSMC1/TNFAIP1/SKP1/PSMA1/AXIN1/DDB1/KLHL20/DDA1/MAEA/HSP90AB1/YOD1/PSMB5/GID8/CRBN/DCAF12L2/UFL1/ANAPC5/PSME3/NSFL1C/LTN1	BP
GO:0030334	regulation of cell migration	54	0.437907	1.54886	0.0125686	0.168347	0.15233	2794	tags=33%, list=17%, signal=28%	FZD4/NRP1/VEGFA/CDH2/TGFB3/ATVR1/SLC8B1/ARF6/PDGFC/NTN1/UBE2I/BCL2/FGF4/WNT11/TGFB2/MPP1/FAM60A/SEMA3A	BP
GO:1903131	mononuclear cell differentiation	27	0.526167	1.6239	0.0126731	0.168347	0.15233	4370	tags=56%, list=27%, signal=41%	RAG2/MYH9/FOSL2/LFNG/CHD7/LCK/TOP2B/BCL2/BCL6/NFIL3/PCK1/IRF8/CEBPB/SYK/HDAC4	BP
GO:0048285	organelle fission	41	-0.391613	-1.58062	0.0132282	0.173377	0.156882	2993	tags=39%, list=19%, signal=32%	NDC80/RAD51/CHMP4B/TRIP13/MIS12/BRIP1/FAM175A/CDC42/RAN/NDEL1/CDCA9/RAD54L/TOP2A/ANAPC5/NSFL1C/CHMP2A	BP
GO:0044344	cellular response to fibroblast growth factor stimulus	15	0.61232	1.64136	0.0141098	0.1825	0.165136	3251	tags=60%, list=20%, signal=48%	SPRY2/FGFRL1/WNT3A/FGF4/GPC1/FGFR3/FGFR1/RAB14/FGFR2	BP
GO:0016236	macroautophagy	27	-0.449354	-1.63381	0.014813	0.189106	0.171113	2308	tags=44%, list=14%, signal=38%	WDR24/TOM1/TECPR1/WIPI2/YOD1/TMEM41B/CTSD/RAB33B/PHB2/PEX5/UFL1/NSFL1C	BP
GO:0006364	rRNA processing	16	-0.547846	-1.71428	0.0151238	0.190598	0.172464	4394	tags=81%, list=27%, signal=59%	DKC1/FTSJ3/RPL5/RPL7/DIEXF/UTP15/DCAF13/METTL16/SBDS/C1D/RPL7A/NOL11/RPL35	BP
GO:0071774	response to fibroblast growth factor	16	0.596531	1.62512	0.0160322	0.199267	0.180308	3251	tags=56%, list=20%, signal=45%	SPRY2/FGFRL1/WNT3A/FGF4/GPC1/FGFR3/FGFR1/RAB14/FGFR2	BP
GO:0007411	axon guidance	41	0.462486	1.5558	0.0164523	0.199267	0.180308	4094	tags=37%, list=25%, signal=27%	EFNB1/NRP1/NEO1/GAP43/NTN1/BSG/EPHA7/TENM2/SEMA3A/EFNA5/PTK7/NELL2/DRAXIN/EN2/EPHA5	BP
GO:0097485	neuron projection guidance	41	0.462486	1.5558	0.0164523	0.199267	0.180308	4094	tags=37%, list=25%, signal=27%	EFNB1/NRP1/NEO1/GAP43/NTN1/BSG/EPHA7/TENM2/SEMA3A/EFNA5/PTK7/NELL2/DRAXIN/EN2/EPHA5	BP
GO:0008284	positive regulation of cell population proliferation	101	0.37273	1.45192	0.0166225	0.199267	0.180308	3685	tags=41%, list=23%, signal=32%	FZD4/NRP1/VEGFA/TGFB3/TSC22D1/FOSL2/NTRK3/WNT3A/PDGFC/NTN1/RBPMS2/PRLR/RELA/CNTF/BCL2/FGF4/P2RY6/PMS2/GPC1/NKX2-5/AGTR1/NTRK2/BCL6/TGFB2/STMN2/JAK2/FGFR3/TENM2/FAM60A/FGFR1/VIP/MAP6/MUSK/TFRC/FGFR2/IGF2/VCAN/HDAC1/RPS6/DISP3/TENM1	BP
GO:0006413	translational initiation	21	-0.482686	-1.63891	0.0182562	0.214404	0.194005	3402	tags=52%, list=21%, signal=41%	EIF2A/EIF3E/EIF2S3/NCBP1/DNAJC3/EIF2S1/EIF4A2/PAIP2B/EIF3H/EIF3M/DENR	BP
GO:0002181	cytoplasmic translation	17	-0.523908	-1.66856	0.0183674	0.214404	0.194005	2884	tags=59%, list=18%, signal=48%	EIF3E/RPLP0/EIF2S3/RPL22/EIF3H/RPL15/EIF3M/CNBP/DENR/RPL36	BP
GO:0001649	osteoblast differentiation	16	0.590126	1.60767	0.0185395	0.214404	0.194005	2242	tags=38%, list=14%, signal=32%	WWOX/RIOX1/FOSL2/ATVR1/JUND/WNT11	BP
GO:0010564	regulation of cell cycle process	51	-0.351414	-1.49186	0.0193343	0.220996	0.19997	3506	tags=49%, list=22%, signal=39%	HSP90AA1/THOC5/CASP2/HSF3/MRE11/NDC80/TRIP13/CHORDC1/CCND1/KLHL9/FAM175A/DCTN1/BRE/FEN1/CDC42/NBN/TIPIN/UFL1/BCL2L1/MDM1/MSH6/ANAPC5/RB1/PSME3/NSFL1C	BP
GO:0007249	canonical NF-kappaB signal transduction	16	0.587384	1.6002	0.019631	0.221807	0.200704	1816	tags=38%, list=11%, signal=33%	NFKB1/REL/NKIRAS2/UBE2I/TRIM59/RELA	BP
GO:0022412	cellular process involved in reproduction in multicellular organism	25	0.519367	1.57487	0.0208762	0.233197	0.21101	2997	tags=40%, list=19%, signal=33%	FZD4/TBPL1/PCK2/MARF1/CCNB1/ATVR1/ZPBP1/BCL2/TDRD7/PCK1	BP
GO:0032870	cellular response to hormone stimulus	39	0.459771	1.53173	0.0214065	0.236434	0.213939	3808	tags=41%, list=24%, signal=31%	GHR/PCK2/ESR2/THRA/PRLR/P2RY6/AGTR1/JAK2/PRKAR1A/LHCGR/PCK1/IGF2/RARB/HDAC1/PKLR/THRB	BP
GO:2000145	regulation of cell motility	56	0.417541	1.48631	0.022839	0.249103	0.225403	2794	tags=32%, list=17%, signal=27%	FZD4/NRP1/VEGFA/CDH2/TGFB3/ATVR1/SLC8B1/ARF6/PDGFC/NTN1/UBE2I/BCL2/FGF4/WNT11/TGFB2/MPP1/FAM60A/SEMA3A	BP
GO:0003006	developmental process involved in reproduction	44	0.443278	1.51047	0.0233951	0.249103	0.225403	2997	tags=39%, list=19%, signal=32%	FZD4/TBPL1/PCK2/MARF1/TBX3/GGNBP2/ATVR1/LFNG/ZPBP1/CHD7/BCL2/BCL6/TGFB2/TDRD7/STRBP/LHCGR/PCK1	BP
GO:0072522	purine-containing compound biosynthetic process	24	0.52028	1.56168	0.0236827	0.249103	0.225403	947	tags=25%, list=6%, signal=24%	ATP5B/NPPA/XDH/ADCY9/PRPSAP2/ELOVL6	BP
GO:0032446	protein modification by small protein conjugation	67	-0.318076	-1.42893	0.0239023	0.249103	0.225403	3319	tags=48%, list=21%, signal=38%	HSPA5/RACK1/WDR24/RPL5/TNFAIP1/SKP1/CISH/DDB1/MIB2/DCUN1D1/KLHL20/DDA1/KLHL9/WDR48/RNF13/RNF141/CRBN/UBE2F/DCAF13/UBE2V1/PCMTD1/DCAF12L2/AKTIP/URM1/UFL1/BIRC2/SUMO1/KLHL7/ANAPC5/CHP1/G2E3/LTN1	BP
GO:0032880	regulation of protein localization	53	-0.340174	-1.45671	0.0239872	0.249103	0.225403	3458	tags=42%, list=21%, signal=33%	ABHD17B/FAM65B/HRAS/PDCD10/EPB41/RAB11A/TGFBR2/DCTN1/CDK9/AACS/PGRMC1/CTSD/YWHAZ/WLS/RAN/TLDC1/SDC4/PDLIM7/BCL2L1/CHP1/ENSA/NSFL1C	BP
GO:0030154	cell differentiation	380	0.290374	1.27006	0.0246792	0.249103	0.225403	4377	tags=34%, list=27%, signal=25%	SOX11/FZD4/WWOX/DPYSL2/TBPL1/EFNB1/PCK2/NRP1/FYN/HHEX/VEGFA/NEO1/MARF1/RIOX1/SOX8/CDH2/TGFB3/RAG2/TBX3/MAFB/GGNBP2/MYH9/CCNB1/FOSL2/ATVR1/NTRK3/GAP43/LPL/LFNG/TOLLIP/ZPBP1/CHD7/WNT3A/TLL1/LCK/ARF6/TOP2B/NTN1/LLPH/RBPMS2/THRA/NR2F2/UBA5/CNTF/BSG/BCL2/MYH15/SIX3/MYOD1/JUND/FGF4/LOXL2/WNT11/GPC1/NKX2-5/AGTR1/NTRK2/BMPR1B/BCL6/GATA4/EPHA7/TGFB2/TNNT2/STMN2/JAK2/MYBPC2/MAPK4/PRKAR1A/TENM2/TDRD7/FAM60A…	BP
GO:0048869	cellular developmental process	380	0.290374	1.27006	0.0246792	0.249103	0.225403	4377	tags=34%, list=27%, signal=25%	SOX11/FZD4/WWOX/DPYSL2/TBPL1/EFNB1/PCK2/NRP1/FYN/HHEX/VEGFA/NEO1/MARF1/RIOX1/SOX8/CDH2/TGFB3/RAG2/TBX3/MAFB/GGNBP2/MYH9/CCNB1/FOSL2/ATVR1/NTRK3/GAP43/LPL/LFNG/TOLLIP/ZPBP1/CHD7/WNT3A/TLL1/LCK/ARF6/TOP2B/NTN1/LLPH/RBPMS2/THRA/NR2F2/UBA5/CNTF/BSG/BCL2/MYH15/SIX3/MYOD1/JUND/FGF4/LOXL2/WNT11/GPC1/NKX2-5/AGTR1/NTRK2/BMPR1B/BCL6/GATA4/EPHA7/TGFB2/TNNT2/STMN2/JAK2/MYBPC2/MAPK4/PRKAR1A/TENM2/TDRD7/FAM60A…	BP
GO:0035107	appendage morphogenesis	18	0.560304	1.57323	0.0248808	0.249103	0.225403	4497	tags=61%, list=28%, signal=44%	TBX3/CHD7/WNT3A/WNT11/BMPR1B/RARB/MSX1/HDAC1/SOX9/HAND2/TBX5	BP
GO:0001944	vasculature development	59	0.410255	1.47343	0.0248952	0.249103	0.225403	2447	tags=31%, list=15%, signal=26%	FZD4/NRP1/ATP5B/VEGFA/CDH2/STK11/MYH9/TSPAN12/ATVR1/ITGAV/CHD7/NRXN3/BSG/LOXL2/WNT11/NKX2-5/AGTR1/NRXN1	BP
GO:1903829	positive regulation of protein localization	26	-0.434769	-1.56433	0.0250877	0.249103	0.225403	3990	tags=62%, list=25%, signal=46%	PCM1/YWHAE/ABHD17B/HRAS/PDCD10/EPB41/TGFBR2/DCTN1/CDK9/AACS/PGRMC1/WLS/RAN/TLDC1/SDC4/CHP1	BP

## Sheet: LV
ID	Description	setSize	enrichmentScore	NES	pvalue	p.adjust	qvalue	rank	leading_edge	core_enrichment	ontology
GO:0065003	protein-containing complex assembly	138	-0.350842	-1.78164	9.34754e-06	0.00569538	0.00526342	2256	tags=30%, list=13%, signal=27%	CTTN/PPP2CB/CELF2/CENPN/CDC42/SAMHD1/ME1/RAD51/CAPZA1/FAM49A/NSG1/TGM2/DBN1/MYH11/CLP1/EIF3H/TBCD/STMN1/PRPF3/EIF3M/BTK/DR1/PSIP1/ERAL1/TAPBP/BIN2/PDIA3/PRNP/MTPN/HOPX/CAPZB/TMEM70/CHAF1A/CENPA/DENR/CSNK1A1/RPLP0/HCCS/TWF2/SMARCB1/TFIP11/KHDC4	BP
GO:0044085	cellular component biogenesis	301	-0.276427	-1.54484	1.16828e-05	0.00569538	0.00526342	2705	tags=28%, list=16%, signal=24%	FARSA/CTSD/STRAP/GJC3/MTERF3/HSF2/OCLN/RPL7A/ACTN2/CTTN/PPP2CB/EIF2A/THY1/RPS12/CELF2/CENPN/CDC42/ZNF622/SAMHD1/ME1/ODF2/TRIP13/RAD51/CAPZA1/FAM49A/NSG1/TMEM41B/CSRP1/NDC80/CCDC61/TGM2/DBN1/MYH11/VCL/CLP1/PCM1/EIF3H/TBCD/TGFBR2/TLCD1/ATF7IP/STMN1/PAN2/EPHB2/PRPF3/EIF3M/BTK/DR1/LAMB1/PSIP1/C1D/ERAL1/RAB33B/YWHAZ/TAPBP/BIN2/PDIA3/PRNP/MTPN/HOPX/RPS17/NOC4L/CAPZB/CDH3/TMEM70/PAFAH1B1/MDM1/CHAF1A/CHM…	BP
GO:0000278	mitotic cell cycle	89	-0.400846	-1.89824	2.76234e-05	0.00897761	0.00829672	3911	tags=44%, list=22%, signal=34%	CDCA9/FAM175A/PABIR3/CHEK1/TUBA8A/SMC2/MCM3/CHMP4B/CENPT/SBDS/TUBB4B/ASNS/NBN/ANAPC5/PPP2CB/TUB4A/CCND1/CDC42/PPP2R2D/TUBB3/PSME3/RTFDC1/RAD51/NDC80/CCDC61/TUBA1A/STMN1/CCNB3/TUBB6/KIF18B/ENSA/PAFAH1B1/DCTN1/CHMP2A/MSH6/CENPA/RB1/TIPIN/NSFL1C	BP
GO:0022607	cellular component assembly	268	-0.26844	-1.47803	6.91588e-05	0.0168575	0.0155789	2705	tags=28%, list=16%, signal=24%	FARSA/CTSD/STRAP/GJC3/MTERF3/HSF2/OCLN/ACTN2/CTTN/PPP2CB/EIF2A/THY1/CELF2/CENPN/CDC42/SAMHD1/ME1/ODF2/TRIP13/RAD51/CAPZA1/FAM49A/NSG1/TMEM41B/CSRP1/NDC80/CCDC61/TGM2/DBN1/MYH11/VCL/CLP1/PCM1/EIF3H/TBCD/TGFBR2/TLCD1/STMN1/PAN2/EPHB2/PRPF3/EIF3M/BTK/DR1/LAMB1/PSIP1/ERAL1/RAB33B/YWHAZ/TAPBP/BIN2/PDIA3/PRNP/MTPN/HOPX/CAPZB/CDH3/TMEM70/PAFAH1B1/MDM1/CHAF1A/CHMP2A/TA3/CENPA/DENR/CSNK1A1/RPLP0/WIPI2/HCC…	BP
GO:0043933	protein-containing complex organization	227	-0.274562	-1.48767	0.000138817	0.0225709	0.0208591	2256	tags=26%, list=13%, signal=23%	CTTN/PPP2CB/CELF2/CENPN/CDC42/EEF1AKMT1/SAMHD1/RPS6KA5/ME1/KDM5B/SETD1A/HMGN1/RAD51/CAPZA1/FAM49A/NSG1/LMNB2/TGM2/DBN1/PEX5/MYH11/TADA2A/CLP1/EIF3H/TBCD/TECPR1/ATF7IP/STMN1/RAD54L/PRPF3/KIF18B/EIF3M/BTK/DR1/MIER1/PSIP1/ERAL1/TAPBP/BIN2/PDIA3/PRNP/MTPN/MMS22L/DSTN/HOPX/CAPZB/TMEM70/CHAF1A/CENPA/DENR/CSNK1A1/RPLP0/HCCS/TWF2/RB1/SMYD2/SMARCB1/TFIP11/KHDC4	BP
GO:0006996	organelle organization	327	-0.252323	-1.42215	0.000138898	0.0225709	0.0208591	3619	tags=33%, list=21%, signal=27%	CHEK1/TUBA8A/RPA1/SMC2/CAPZA2/ULK3/FOPNL/APOA1/ACTR3/CENPO/KRT24/RIF1/HSPB1/MCM3/ACTA1/ANXA1/MYO1G/CHMP4B/DKC1/TERF2IP/CENPT/SBDS/TUBB4B/HMGB3/CTSD/MTERF3/IGF1/RHOT2/RAB2A/PLEKHF2/NBN/ACTN2/ANAPC5/TOP2A/CTTN/EIF2A/TUB4A/THY1/AGTPBP1/CENPN/CDC42/VAMP7/PPP2R2D/DDX1/TUBB3/CENPS/ODF2/TERF2/TRIP13/FEN1/RAD51/CAPZA1/FAM49A/DNA2/TMEM41B/SEC31A/CSRP1/LMNB2/MAEA/LYSMD3/NDC80/CCDC61/TUBA1A/DBN1/PEX5/TPM1/M…	BP
GO:0010639	negative regulation of organelle organization	25	-0.585999	-2.09252	0.000583942	0.0813348	0.0751661	3619	tags=64%, list=21%, signal=51%	CHEK1/CAPZA2/HSPB1/IGF1/TOP2A/TERF2/TRIP13/CAPZA1/NDC80/TBCD/FNIP1/STMN1/MTPN/CAPZB/MDM1/TWF2	BP
GO:1903047	mitotic cell cycle process	71	-0.390398	-1.77505	0.000749613	0.0913591	0.0844301	2394	tags=52%, list=14%, signal=45%	DCTN2/KIF2A/TAOK3/MYC/RAN/KIF4B/MIS12/CDCA9/FAM175A/PABIR3/CHEK1/SMC2/MCM3/CHMP4B/SBDS/NBN/ANAPC5/CCND1/CDC42/PPP2R2D/PSME3/RTFDC1/RAD51/NDC80/CCDC61/STMN1/CCNB3/KIF18B/ENSA/PAFAH1B1/DCTN1/CHMP2A/MSH6/CENPA/RB1/TIPIN/NSFL1C	BP
GO:1901566	organonitrogen compound biosynthetic process	194	-0.269279	-1.43589	0.00101481	0.0969215	0.0895706	3048	tags=30%, list=17%, signal=25%	HACD3/ALAS1/DEGS1/DCK/ORMDL2/EARS2/DAD1/FARSA/GATM/ST6GALNAC2/NCBP1/ASNS/PCBD1/BZW2/SGMS1/ADSS2/EIF2A/RPS12/CELF2/CNBP/RPL36/TMLHE/POMK/PLA2G4A/RARS/AMPD1/QKI/EIF3H/LOC422214/RPL13/ADA/PAIP2B/NOS2/ATIC/GOLGA7/PAN2/IARS2/AGO3/GXYLT1/EIF3M/METTL14/CHPT1/SAT1/CMPK1/CKB/RPS17/EEF1B2/NME2/PGRMC1/DENR/HS2ST1/RPLP0/WIPI2/AK1/ODC/RPL35/LTN1/CKMT2/RPS4Y1	BP
GO:0006396	RNA processing	98	-0.333961	-1.60863	0.00108842	0.0969215	0.0895706	2666	tags=34%, list=15%, signal=29%	DKC1/SBDS/STRAP/THADA/NCBP1/MBNL1/RPL7A/CELF2/DDX1/XRN2/TRMU/QKI/CLP1/LOC422214/SMU1/PAN2/PRPF3/PSIP1/C1D/METTL14/VWA9/TARDBP/THOC5/ZRANB2/PRKRIP1/INTS9/NSUN2/SUPV3L1/TFIP11/RPL35/KHDC4/INTS2/SRSF2	BP
GO:0031333	negative regulation of protein-containing complex assembly	22	-0.579449	-1.9953	0.00109347	0.0969215	0.0895706	2114	tags=50%, list=12%, signal=44%	CAPZA2/HSPB1/CDC42/CAPZA1/TBCD/STMN1/MTPN/CAPZB/CSNK1A1/TWF2/TFIP11	BP
GO:0022613	ribonucleoprotein complex biogenesis	60	-0.384507	-1.69251	0.00185963	0.138409	0.127911	2944	tags=40%, list=17%, signal=33%	DKC1/SBDS/STRAP/MTERF3/RPL7A/EIF2A/RPS12/CELF2/ZNF622/CLP1/EIF3H/PRPF3/EIF3M/PSIP1/C1D/ERAL1/RPS17/NOC4L/DENR/PNO1/RPLP0/RPL35/LSG1/KHDC4	BP
GO:0071840	cellular component organization or biogenesis	654	-0.20261	-1.19818	0.00218633	0.138409	0.127911	2403	tags=22%, list=14%, signal=19%	PLEKHF2/PRELID1/NBN/RPL7A/ACTN2/RELN/ANAPC5/P3H1/TOP2A/PRRX1/CTTN/PPP2CB/EIF2A/TUB4A/THY1/RPS12/CELF2/AGTPBP1/CENPN/CDC42/VAMP7/ZNF622/PPP2R2D/EEF1AKMT1/SAMHD1/DDX1/RPS6KA5/ABHD17B/TUBB3/ME1/KDM5B/SETD1A/HMGN1/SGK1/CENPS/ODF2/TERF2/TRIP13/FEN1/RAD51/CAPZA1/FAM49A/DNA2/NSG1/TMEM41B/SEC31A/CSRP1/LMNB2/MAEA/LYSMD3/NDC80/CCDC61/TGM2/TUBA1A/DBN1/PEX5/TPM1/MYH11/PI4K2B/TADA2A/VCL/CLP1/PCM1/EIF3H/TBCD/T…	BP
GO:0051129	negative regulation of cellular component organization	50	-0.40326	-1.70452	0.00235571	0.138409	0.127911	2560	tags=44%, list=15%, signal=38%	CHEK1/CAPZA2/APOA1/HSPB1/IGF1/P3H1/TOP2A/THY1/CDC42/TERF2/TRIP13/CAPZA1/NDC80/TBCD/FNIP1/STMN1/MTPN/CAPZB/MDM1/CSNK1A1/TWF2/TFIP11	BP
GO:0001666	response to hypoxia	18	0.642795	1.77712	0.00247034	0.138409	0.127911	599	tags=28%, list=3%, signal=27%	FZD4/VEGFA/BCL2/CHRNB2/HYOU1	BP
GO:0036293	response to decreased oxygen levels	18	0.642795	1.77712	0.00247034	0.138409	0.127911	599	tags=28%, list=3%, signal=27%	FZD4/VEGFA/BCL2/CHRNB2/HYOU1	BP
GO:0007169	transmembrane receptor protein tyrosine kinase signaling pathway	70	0.450823	1.62864	0.00269279	0.138409	0.127911	3429	tags=43%, list=20%, signal=35%	FZD4/VEGFA/EFNB1/GHR/EFNA5/PDGFC/FYN/JAK2/FGFRL1/EPHA7/SRC/FGFR3/MUSK/NTRK3/EGFR/NRP1/EPHA5/GFRA2/IGFBP2/WNT3A/SYK/NRG1/FGF4/IGF2/EPHA3/MVB12A/PTPRJ/FGFR2/NTF3/GFRA4	BP
GO:0051494	negative regulation of cytoskeleton organization	16	-0.61093	-1.92338	0.00278457	0.138409	0.127911	1751	tags=56%, list=10%, signal=51%	CAPZA2/HSPB1/CAPZA1/TBCD/STMN1/MTPN/CAPZB/MDM1/TWF2	BP
GO:0007167	enzyme-linked receptor protein signaling pathway	109	0.408155	1.56342	0.00287799	0.138409	0.127911	3429	tags=37%, list=20%, signal=30%	FZD4/VEGFA/EFNB1/GHR/ACVR2B/RGMA/RBPMS2/EFNA5/PDGFC/FYN/JAK2/FGFRL1/EPHA7/SRC/FGFR3/MUSK/NTRK3/EGFR/ZYX/GLG1/NRP1/EPHA5/GFRA2/IGFBP2/FST/WNT3A/SYK/NRG1/BMP2/FGF4/IGF2/TGFB3/CHRDL1/EPHA3/MVB12A/PTPRJ/FGFR2/ATVR1/NTF3/GFRA4	BP
GO:0070482	response to oxygen levels	19	0.629598	1.76377	0.0029102	0.138409	0.127911	599	tags=26%, list=3%, signal=25%	FZD4/VEGFA/BCL2/CHRNB2/HYOU1	BP
GO:1902904	negative regulation of supramolecular fiber organization	19	-0.579665	-1.9185	0.00298111	0.138409	0.127911	3510	tags=47%, list=20%, signal=38%	CAPZA2/HSPB1/P3H1/CAPZA1/TBCD/STMN1/MTPN/CAPZB/TWF2	BP
GO:0006261	DNA-templated DNA replication	19	-0.57464	-1.90186	0.00334028	0.148035	0.136808	2049	tags=53%, list=12%, signal=46%	SAMHD1/CENPS/RTFDC1/RAD51/DNA2/POLD3/PCNA/MMS22L/MSH6/TIPIN	BP
GO:0001934	positive regulation of protein phosphorylation	44	0.49673	1.66029	0.00407836	0.163476	0.151077	4156	tags=45%, list=24%, signal=35%	FZD4/VEGFA/BCL2/GHR/EFNA5/PDGFC/JAK2/IFNG/TENM1/PRRC1/STK11/NRG1/FGF4/IGF2/ISL1/NTF3/TPD52L1/CNTF/PDCD10/TGFB2	BP
GO:0140014	mitotic nuclear division	25	-0.505033	-1.80341	0.00432526	0.163476	0.151077	4617	tags=60%, list=26%, signal=44%	RAN/MIS12/CDCA9/FAM175A/CHEK1/SMC2/CHMP4B/ANAPC5/CDC42/PPP2R2D/NDC80/CCDC61/KIF18B/CHMP2A/NSFL1C	BP
GO:0007600	sensory perception	25	0.573886	1.71335	0.0044656	0.163476	0.151077	3630	tags=32%, list=21%, signal=25%	FZD4/PCDH15/RLBP1/CRYBA4/SOBP/CHD7/LHFPL5/IMPG1	BP
GO:0007166	cell surface receptor signaling pathway	248	0.338827	1.3987	0.00494763	0.163476	0.151077	3741	tags=33%, list=21%, signal=26%	FZD4/WWOX/VEGFA/SOX11/FZD1/EFNB1/LRP1/BCL2/UNC5C/NFKBIA/GHR/ACVR2B/RGMA/CHRNB2/RBPMS2/EFNA5/DKK3/PDGFC/FYN/JAK2/FGFRL1/PTCH1/WNT11/GLI2/GSKIP/ADORA1/EPHA7/LDB1/IFNG/SRC/CDC73/FGFR3/MUSK/CDH6/NTRK3/PRLR/EGFR/ZYX/ITGAV/GLG1/STK11/NRP1/EPHA5/GFRA2/IHH/IGFBP2/FST/WNT3A/SYK/CPZ/NRG1/CHRNB3/BMP2/RFNG/FGF4/CNTFR/CHUK/IGF2/CDH2/GOT1/ISL1/TGFB3/CHRDL1/SEMA3A/EPHA3/MVB12A/PTPRJ/FGFR2/APCDD1/NKIRAS2/ATVR1/S…	BP
GO:0043604	amide biosynthetic process	99	-0.306818	-1.4809	0.00524678	0.163476	0.151077	3736	tags=38%, list=21%, signal=30%	RPL39L/CYR61/METTL16/UBA52/RPL22/MOV10/MRPL51/DEGS1/ORMDL2/EARS2/FARSA/NCBP1/ASNS/BZW2/SGMS1/EIF2A/RPS12/CELF2/CNBP/RPL36/RARS/QKI/EIF3H/LOC422214/RPL13/PAIP2B/PAN2/IARS2/AGO3/EIF3M/METTL14/RPS17/EEF1B2/DENR/RPLP0/RPL35/LTN1/RPS4Y1	BP
GO:0043603	amide metabolic process	117	-0.293645	-1.45606	0.00532915	0.163476	0.151077	3736	tags=38%, list=21%, signal=30%	RPL39L/CYR61/METTL16/UBA52/LOC771456/RPL22/MOV10/MRPL51/NPL/DEGS1/PSEN1/ORMDL2/EARS2/FARSA/NCBP1/ASNS/BZW2/SGMS1/EIF2A/RPS12/CELF2/CNBP/RPL36/RARS/QKI/EIF3H/LOC422214/RPL13/PAIP2B/FAR1/PAN2/IARS2/AGO3/EIF3M/METTL14/PSEN2/SPCS3/RPS17/EEF1B2/DENR/RPLP0/RPL35/LTN1/RPS4Y1	BP
GO:0007411	axon guidance	40	0.502335	1.6514	0.00543884	0.163476	0.151077	6360	tags=72%, list=37%, signal=46%	EFNB1/BSG/UNC5C/EFNA5/EPHA7/GBX2/NEO1/GAP43/NRP1/EPHA5/NFASC/ISL1/SEMA3A/EPHA3/FOXP1/PTK7/NTN1/GATA3/CNTN1/EPHB6/SEMA3E/NTN3/TENM2/DRAXIN/NELL2/SEMA3C/NFIB/FLRT3/SEMA3D	BP
GO:0097485	neuron projection guidance	40	0.502335	1.6514	0.00543884	0.163476	0.151077	6360	tags=72%, list=37%, signal=46%	EFNB1/BSG/UNC5C/EFNA5/EPHA7/GBX2/NEO1/GAP43/NRP1/EPHA5/NFASC/ISL1/SEMA3A/EPHA3/FOXP1/PTK7/NTN1/GATA3/CNTN1/EPHB6/SEMA3E/NTN3/TENM2/DRAXIN/NELL2/SEMA3C/NFIB/FLRT3/SEMA3D	BP
GO:0006518	peptide metabolic process	96	-0.309666	-1.48532	0.00553394	0.163476	0.151077	2872	tags=39%, list=16%, signal=32%	RPL39L/METTL16/UBA52/LOC771456/RPL22/MOV10/MRPL51/PSEN1/EARS2/FARSA/NCBP1/BZW2/EIF2A/RPS12/CELF2/CNBP/RPL36/RARS/QKI/EIF3H/LOC422214/RPL13/PAIP2B/PAN2/IARS2/AGO3/EIF3M/METTL14/PSEN2/SPCS3/RPS17/EEF1B2/DENR/RPLP0/RPL35/LTN1/RPS4Y1	BP
GO:1902850	microtubule cytoskeleton organization involved in mitosis	21	-0.529585	-1.80092	0.00564447	0.163476	0.151077	1526	tags=33%, list=9%, signal=30%	NDC80/CCDC61/STMN1/PAFAH1B1/DCTN1/CENPA/NSFL1C	BP
GO:0010562	positive regulation of phosphorus metabolic process	61	0.449328	1.58807	0.00580755	0.163476	0.151077	4156	tags=46%, list=24%, signal=35%	FZD4/VEGFA/BCL2/GHR/EFNA5/PDGFC/JAK2/IFNG/TENM1/FGFR3/MUSK/NTRK3/PRRC1/LHCGR/STK11/IHH/NRG1/FGF4/IGF2/ISL1/FGFR2/ATVR1/NTF3/TPD52L1/CNTF/ROS1/PDCD10/TGFB2	BP
GO:0045937	positive regulation of phosphate metabolic process	61	0.449328	1.58807	0.00580755	0.163476	0.151077	4156	tags=46%, list=24%, signal=35%	FZD4/VEGFA/BCL2/GHR/EFNA5/PDGFC/JAK2/IFNG/TENM1/FGFR3/MUSK/NTRK3/PRRC1/LHCGR/STK11/IHH/NRG1/FGF4/IGF2/ISL1/FGFR2/ATVR1/NTF3/TPD52L1/CNTF/ROS1/PDCD10/TGFB2	BP
GO:0006412	translation	87	-0.315002	-1.48663	0.00586836	0.163476	0.151077	2804	tags=31%, list=16%, signal=26%	EARS2/FARSA/NCBP1/BZW2/EIF2A/RPS12/CELF2/CNBP/RPL36/RARS/QKI/EIF3H/LOC422214/RPL13/PAIP2B/PAN2/IARS2/AGO3/EIF3M/METTL14/RPS17/EEF1B2/DENR/RPLP0/RPL35/LTN1/RPS4Y1	BP
GO:0042254	ribosome biogenesis	38	-0.421605	-1.67412	0.00606881	0.164364	0.151898	3868	tags=61%, list=22%, signal=47%	RPS15/DCAF13/RAN/MRPS7/DHX30/NOL11/METTL16/DIEXF/DKC1/SBDS/MTERF3/RPL7A/EIF2A/RPS12/ZNF622/C1D/ERAL1/RPS17/NOC4L/PNO1/RPLP0/RPL35/LSG1	BP
GO:0032984	protein-containing complex disassembly	34	-0.440228	-1.70409	0.00627874	0.165453	0.152905	1751	tags=32%, list=10%, signal=29%	CAPZA1/PEX5/TECPR1/STMN1/KIF18B/MTPN/DSTN/CAPZB/TWF2/SMARCB1/TFIP11	BP
GO:0043043	peptide biosynthetic process	88	-0.312756	-1.47865	0.00679674	0.166367	0.153749	2804	tags=31%, list=16%, signal=26%	EARS2/FARSA/NCBP1/BZW2/EIF2A/RPS12/CELF2/CNBP/RPL36/RARS/QKI/EIF3H/LOC422214/RPL13/PAIP2B/PAN2/IARS2/AGO3/EIF3M/METTL14/RPS17/EEF1B2/DENR/RPLP0/RPL35/LTN1/RPS4Y1	BP
GO:0016055	Wnt signaling pathway	56	0.45674	1.59068	0.00682532	0.166367	0.153749	5709	tags=54%, list=33%, signal=36%	FZD4/WWOX/SOX11/FZD1/LRP1/DKK3/WNT11/GSKIP/LDB1/CDC73/STK11/WNT3A/CPZ/CDH2/ISL1/APCDD1/SFRP2/PTK7/SFRP1/NKX2-5/GATA3/SIX3/FZD7/FRZB/GID8/DRAXIN/DAAM2/HDAC1/UBAC2/FZD10	BP
GO:0198738	cell-cell signaling by wnt	56	0.45674	1.59068	0.00682532	0.166367	0.153749	5709	tags=54%, list=33%, signal=36%	FZD4/WWOX/SOX11/FZD1/LRP1/DKK3/WNT11/GSKIP/LDB1/CDC73/STK11/WNT3A/CPZ/CDH2/ISL1/APCDD1/SFRP2/PTK7/SFRP1/NKX2-5/GATA3/SIX3/FZD7/FRZB/GID8/DRAXIN/DAAM2/HDAC1/UBAC2/FZD10	BP
GO:0034660	ncRNA metabolic process	60	-0.351412	-1.54683	0.00755849	0.179745	0.166112	3840	tags=42%, list=22%, signal=33%	NOL11/METTL16/METTL2B/DIEXF/INTS10/DKC1/SBDS/EARS2/FARSA/THADA/OCLN/RPL7A/PRL/DDX1/TRMU/RARS/CLP1/IARS2/C1D/VWA9/INTS9/NSUN2/SMARCB1/RPL35/INTS2	BP
GO:0033043	regulation of organelle organization	69	-0.335956	-1.52047	0.00792288	0.183924	0.169975	2300	tags=36%, list=13%, signal=32%	ANAPC5/TOP2A/CTTN/CDC42/ODF2/TERF2/TRIP13/FEN1/CAPZA1/FAM49A/NDC80/DBN1/TBCD/TGFBR2/FNIP1/ATF7IP/STMN1/PAN2/RAB33B/MTPN/CAPZB/PAFAH1B1/DCTN1/MDM1/TWF2	BP
GO:0042327	positive regulation of phosphorylation	54	0.454453	1.57294	0.00850421	0.192828	0.178203	4156	tags=46%, list=24%, signal=35%	FZD4/VEGFA/BCL2/GHR/EFNA5/PDGFC/JAK2/IFNG/TENM1/FGFR3/MUSK/NTRK3/PRRC1/STK11/NRG1/FGF4/IGF2/ISL1/FGFR2/NTF3/TPD52L1/CNTF/ROS1/PDCD10/TGFB2	BP
GO:0022402	cell cycle process	117	-0.28258	-1.4012	0.00898642	0.199118	0.184016	2394	tags=27%, list=14%, signal=24%	NBN/ANAPC5/TOP2A/CCND1/CENPN/CDC42/PPP2R2D/PSME3/CENPS/RTFDC1/TRIP13/FEN1/RAD51/DNA2/NDC80/CCDC61/PCM1/STMN1/CCNB3/RAD54L/KIF18B/THOC5/ENSA/PAFAH1B1/DCTN1/MDM1/CHMP2A/MSH6/CENPA/RB1/TIPIN/NSFL1C	BP
GO:0016043	cellular component organization	629	-0.192663	-1.13911	0.00923344	0.199118	0.184016	2403	tags=21%, list=14%, signal=19%	PLEKHF2/PRELID1/NBN/ACTN2/RELN/ANAPC5/P3H1/TOP2A/PRRX1/CTTN/PPP2CB/EIF2A/TUB4A/THY1/CELF2/AGTPBP1/CENPN/CDC42/VAMP7/PPP2R2D/EEF1AKMT1/SAMHD1/DDX1/RPS6KA5/ABHD17B/TUBB3/ME1/KDM5B/SETD1A/HMGN1/SGK1/CENPS/ODF2/TERF2/TRIP13/FEN1/RAD51/CAPZA1/FAM49A/DNA2/NSG1/TMEM41B/SEC31A/CSRP1/LMNB2/MAEA/LYSMD3/NDC80/CCDC61/TGM2/TUBA1A/DBN1/PEX5/TPM1/MYH11/PI4K2B/TADA2A/VCL/CLP1/PCM1/EIF3H/TBCD/TGFBR2/TECPR1/FNIP1/…	BP
GO:0031331	positive regulation of cellular catabolic process	16	-0.565119	-1.77916	0.0095762	0.199118	0.184016	1156	tags=31%, list=7%, signal=29%	PAN2/AGO3/METTL14/SUPV3L1/WDR24	BP
GO:0000226	microtubule cytoskeleton organization	58	-0.35093	-1.534	0.0095985	0.199118	0.184016	2195	tags=40%, list=13%, signal=35%	CRIPT/FAM175A/CHEK1/TUBA8A/FOPNL/SBDS/TUBB4B/TUB4A/TUBB3/NDC80/CCDC61/TUBA1A/PCM1/TBCD/STMN1/TUBB6/KIF18B/KIF1BP/PAFAH1B1/DCTN1/MDM1/CENPA/NSFL1C	BP
GO:0032272	negative regulation of protein polymerization	15	-0.572136	-1.76549	0.0100683	0.20343	0.188001	1751	tags=53%, list=10%, signal=48%	CAPZA2/HSPB1/CAPZA1/TBCD/STMN1/MTPN/CAPZB/TWF2	BP
GO:0022411	cellular component disassembly	55	-0.355875	-1.53932	0.0102237	0.20343	0.188001	1751	tags=25%, list=10%, signal=23%	CAPZA1/PEX5/TGFBR2/TECPR1/STMN1/KIF18B/MTPN/DSTN/CAPZB/PAFAH1B1/WIPI2/TWF2/SMARCB1/TFIP11	BP
GO:0008380	RNA splicing	51	-0.361654	-1.53659	0.0105872	0.204849	0.189312	2666	tags=35%, list=15%, signal=30%	STRAP/NCBP1/MBNL1/CELF2/DDX1/QKI/CLP1/LOC422214/SMU1/PRPF3/PSIP1/METTL14/TARDBP/THOC5/PRKRIP1/TFIP11/KHDC4/SRSF2	BP
GO:0032392	DNA geometric change	17	-0.542925	-1.73869	0.010762	0.204849	0.189312	3207	tags=71%, list=18%, signal=58%	XRCC6/DHX30/MCM3/HMGB3/NBN/TOP2A/DDX1/RAD51/DNA2/MCM8/HMGB2/SUPV3L1	BP
GO:0060070	canonical Wnt signaling pathway	37	0.492475	1.5958	0.0109253	0.204849	0.189312	5909	tags=68%, list=34%, signal=45%	FZD4/SOX11/FZD1/LRP1/DKK3/WNT11/GSKIP/STK11/WNT3A/CDH2/ISL1/SFRP2/PTK7/SFRP1/NKX2-5/GATA3/FZD7/FRZB/GID8/DRAXIN/DAAM2/HDAC1/UBAC2/FZD10/CSNK1G1	BP
GO:0071826	protein-RNA complex organization	28	-0.447296	-1.64698	0.0119998	0.220408	0.203692	1395	tags=36%, list=8%, signal=33%	CLP1/EIF3H/PRPF3/EIF3M/PSIP1/ERAL1/DENR/RPLP0/TFIP11/KHDC4	BP
GO:0000280	nuclear division	39	-0.397462	-1.5888	0.0122072	0.220408	0.203692	3911	tags=46%, list=22%, signal=36%	CDCA9/FAM175A/CHEK1/SMC2/CHMP4B/ANAPC5/TOP2A/CDC42/PPP2R2D/CENPS/TRIP13/RAD51/NDC80/CCDC61/RAD54L/KIF18B/CHMP2A/NSFL1C	BP
GO:0009123	nucleoside monophosphate metabolic process	17	-0.535789	-1.71584	0.0130186	0.229229	0.211843	3003	tags=41%, list=17%, signal=34%	DCK/ADSS2/AMPD1/ADA/ATIC/CMPK1/AK1	BP
GO:0051640	organelle localization	54	-0.350278	-1.50914	0.013166	0.229229	0.211843	1618	tags=20%, list=9%, signal=19%	LMNB2/NDC80/YWHAZ/PAFAH1B1/DCTN1/TBC1D23/CENPA/STX10/NSFL1C/LSG1/ARCN1	BP
GO:0071363	cellular response to growth factor stimulus	68	0.418707	1.50533	0.0134119	0.229414	0.212014	3408	tags=32%, list=20%, signal=26%	FZD4/WWOX/VEGFA/ACAP2/ACVR2B/RGMA/RBPMS2/FGFRL1/FGFR3/NTRK3/EGFR/ZYX/GLG1/NRP1/WNT3A/BMP2/FGF4/TGFB3/CHRDL1/FGFR2/ATVR1/NTF3	BP
