# Supplementary material
Source: Research Square preprint supplement (doi:10.21203/rs.3.rs-9275884/v1)
Supplement: Supplementary file 2 [file 554c64f078a3a06805bd151a.xlsx]

## Sheet: BM
metabolite_id	Metabolite	Metabolite Shortname	Metabolic Pathways	Subsystem	log2FC_fluxsum	Reactions
succoa	Succinyl-CoA	Succinyl-CoA	Valine, Leucine And Isoleucine Biosynthesis	BCAA metabolism (Val/Leu/Iso)	-3.19226e-11	MMMm (4.73e-02, 4.73e-02)
ditp	dITP(4-)	DITP	Nucleotide Interconversion	Nucleotide metabolism	-1.13494e-10	NDPK10 (1.20e-03, 1.20e-03); NDPK10n (1.20e-03, 1.20e-03)
datp	dATP	dATP	Biomass And Maintenance Functions	Biomass And Maintenance Functions	2.36426e-11	BIOMASS_maintenance (3.42e-02, 3.42e-02)
nad	Nicotinamide adenine dinucleotide	NAD(+)	Citric Acid Cycle	Central Energy Metabolism	0.439581	AKGDm (8.78e-01, 5.22e-01); MDH (1.68e-01, 4.94e-01); ICDHxm (3.32e-01, 0.00e+00)
ile__L	L-isoleucine	L-isoleucine	2-oxocarboxylic Acid Metabolism	2-oxocarboxylic Acid Metabolism	-1.63801e-11	ILETA (3.20e-02, 3.20e-02)
pi	hydrogenphosphate	HPO4	Oxidative Phosphorylation	Oxidative Phosphorylation	-0.0564085	ATPS4m (1.15e+01, 1.20e+01); PPAm (3.93e-01, 3.93e-01)
h2o	Water	H2O	Extracellular Transport	Extracellular Transport	-2.41234e-11	PCt (9.00e-03, 9.00e-03); CHOLESTle (9.00e-03, 9.00e-03); PSFLIP (1.71e-03, 1.71e-03); r1402 (8.78e-04, 8.78e-04)
cmp	CMP	CMP	Nucleotide Interconversion	Nucleotide metabolism	-1.65768e-11	r0531 (2.29e-02, 2.29e-02); CYTDK1 (7.52e-03, 7.52e-03); CYTK1 (1.72e-03, 1.72e-03); CYTK1m (5.02e-04, 5.02e-04)
imp	IMP	IMP	Purine Catabolism	Purine Catabolism	-0.0368328	r0276 (9.71e-01, 9.96e-01)
clpn_hs	cardiolipin	Cardiolipin	Transport, Mitochondrial	Mitochondrial transport	2.3657e-11	HUMANGEM_MAR00587 (2.26e-04, 2.26e-04)
ditp	dITP(4-)	DITP	Purine Metabolism	Nitrogen disposal	-1.13494e-10	NDPK10 (1.20e-03, 1.20e-03); NDPK10n (1.20e-03, 1.20e-03)
pi	hydrogenphosphate	HPO4	Valine, Leucine And Isoleucine Degradation	BCAA metabolism (Val/Leu/Iso)	-2.84467e-11	PPCOACm (4.73e-02, 4.73e-02)
hmgcoa	Hydroxymethylglutaryl-CoA	HMG-CoA	Butanoate Metabolism	Butanoate Metabolism	-2.32673e-11	HMGCOASim (9.19e-03, 9.19e-03); HMGLm (9.19e-03, 9.19e-03)
2mpdhl	S-(2-Methylpropanoyl)-dihydrolipoamide	S-(2-Methylpropanoyl)-dihydrolipoamide	Valine, Leucine And Isoleucine Biosynthesis	BCAA metabolism (Val/Leu/Iso)	-5.37026e-11	r0385 (1.53e-02, 1.53e-02); r0561 (1.53e-02, 1.53e-02)
thf	5,6,7,8-Tetrahydrofolate	THF	Folate Metabolism	Folate Metabolism	-0.73117	FTHFDHm (1.06e+00, 1.77e+00); GHMT2rm (5.29e-01, 8.83e-01); FTHFL (1.34e-02, 1.34e-02); GARFT (6.71e-03, 6.71e-03); AICART (6.71e-03, 6.71e-03); r0226 (1.20e-03, 1.20e-03)
val__L	L-valine	L-Val	Biomass And Maintenance Functions	Biomass And Maintenance Functions	2.36426e-11	BIOMASS_maintenance (3.42e-02, 3.42e-02)
3mop	3-methyl-2-oxopentanoate	3-Methyl-2-oxopentanoate	Transport, Mitochondrial	Mitochondrial transport	-1.63804e-11	HUMANGEM_MAR08093 (3.20e-02, 3.20e-02)
co2	carbon dioxide	CO2	Pentose Phosphate Pathway	Redox & Pentose Metabolism	3.71447e-11	GND (1.19e-02, 1.19e-02)
nad	Nicotinamide adenine dinucleotide	NAD(+)	Lysine Metabolism	AA other (Cys/Met/Lys/Arg/Pro)	-6	r0594m (0.00e+00, 9.19e-03); r0525 (0.00e+00, 9.19e-03); 2OXOADOXm (0.00e+00, 9.19e-03)
coa	Coenzyme A	CoA	Triacylglycerol Synthesis	Lipid metabolism	-1.39134e-11	GPAM_hs (1.73e-02, 1.73e-02); AGPAT1 (1.73e-02, 1.73e-02); DGAT (3.70e-04, 3.70e-04)
msa	3-oxopropanoate	3-Oxopropanoate	Beta-alanine Metabolism	Beta-alanine Metabolism	-6	MMSAD3m (0.00e+00, 9.67e-02); APAT2rm (0.00e+00, 9.67e-02)
dhlam	dihydrolipoamide	Dihydrolipoamide	Alanine, Aspartate And Glutamate Metabolism	AA central (A/D/E,G/S/T)	-0.740843	GCC2bim (5.29e-01, 8.83e-01)
dttp	dTTP	dTTP	Nucleotide Interconversion	Nucleotide metabolism	2.36426e-11	NDPK4n (1.20e-03, 1.20e-03)
glyc3p	Glycerol 3-phosphate	Glycerol 3-phosphate	Glycerophospholipid Metabolism	Lipid metabolism	-6.78886	r0202c (8.55e-03, 9.85e-01); r0205 (0.00e+00, 9.77e-01); GPDDA1 (9.00e-03, 9.00e-03); PGPPTm (2.77e-04, 2.77e-04)
cbp	Carbamoyl phosphate	Carbamoyl phosphate	Nitrogen Metabolism	Nitrogen disposal	-3.91896e-11	r0034 (5.22e-03, 5.22e-03)
nad	Nicotinamide adenine dinucleotide	NAD(+)	Glyoxylate And Dicarboxylate Metabolism	Glyoxylate And Dicarboxylate Metabolism	-1.55488	MDH (1.68e-01, 4.94e-01)
cytd	Cytidine	Cytidine	Nucleotide Metabolism	Nucleotide metabolism	-1.99883e-11	CYTDK1 (7.52e-03, 7.52e-03)
nad	Nicotinamide adenine dinucleotide	NAD(+)	2-oxocarboxylic Acid Metabolism	2-oxocarboxylic Acid Metabolism	1.63969	AKGDm (8.78e-01, 5.22e-01); PDHm (4.47e-01, 0.00e+00); ICDHxm (3.32e-01, 0.00e+00); 2OXOADOXm (0.00e+00, 9.19e-03)
akg	2-Oxoglutarate	Î±-KG	Glycine, Serine And Threonine Metabolism	AA central (A/D/E,G/S/T)	-0.740843	PSERT (5.29e-01, 8.83e-01)
coa	Coenzyme A	CoA	Butanoate Metabolism	Butanoate Metabolism	0.415037	HMGCOASim (9.19e-03, 9.19e-03); AACOAT (9.19e-03, 9.19e-03); ACACT1r (9.19e-03, 9.19e-03); ACACT1rm (9.19e-03, 0.00e+00)
h	proton	H	Nucleotide Interconversion	Nucleotide metabolism	-0.034628	GMPR (9.69e-01, 9.94e-01); DURIK1 (2.32e-02, 2.32e-02); r0531 (2.29e-02, 2.29e-02); CYTDK1 (7.52e-03, 7.52e-03); ADSS (4.61e-03, 4.61e-03); TRDR (4.12e-03, 4.12e-03); DADNK (1.20e-03, 1.20e-03); DUTPDPm (1.20e-03, 1.20e-03)
nadh	Nicotinamide adenine dinucleotide - reduced	NAD(+)	Folate Metabolism	Folate Metabolism	-0.399023	MTHFD2m (1.06e+00, 1.77e+00); r0552 (1.26e+00, 1.28e+00)
gua	Guanine	Guanine	Purine Metabolism	Nitrogen disposal	-9.27664e-12	GUAPRT (2.49e-02, 2.49e-02); PUNP4 (2.44e-02, 2.44e-02); PUNP3 (5.02e-04, 5.02e-04)
accoa	Acetyl-CoA	Acetyl-CoA	Cholesterol Metabolism	Lipid metabolism	-2.3267e-11	HMGLm (9.19e-03, 9.19e-03)
L2aadp	L-2-aminoadipate(1-)	Adipates	Lysine Degradation	AA other (Cys/Met/Lys/Arg/Pro)	-6	r0450 (0.00e+00, 9.19e-03)
pa_hs	phosphatidate(2-)	PhosphatidAte(2-)	Glycerophospholipid Metabolism	Lipid metabolism	-1.44441e-11	DAGK_hs (1.61e-02, 1.61e-02); CDS (1.12e-03, 1.12e-03)
dhf	7,8-Dihydrofolate	7,8-Dihydrofolate	Nucleotide Interconversion	Nucleotide metabolism	2.36419e-11	TMDSm (1.20e-03, 1.20e-03)
atp	ATP	ATP/ADP	Nucleotide Interconversion	Nucleotide metabolism	1.19712e-11	ADK1 (3.75e-01, 3.75e-01); GK1 (2.65e-02, 2.65e-02); DGK1 (2.44e-02, 2.44e-02); URIDK2 (2.41e-02, 2.41e-02); DURIK1 (2.32e-02, 2.32e-02); CYTDK1 (7.52e-03, 7.52e-03); NDPK1 (5.85e-03, 5.85e-03); NDPK8 (2.39e-03, 2.39e-03); NDPK3m (2.13e-03, 2.13e-03); CYTK1 (1.72e-03, 1.72e-03); NDPK10 (1.20e-03, 1.20e-03); NDPK10n (1.20e-03, 1.20e-03); DADNK (1.20e-03, 1.20e-03); NDPK6m (1.20e-03, 1.20e-03); NDP…
h	proton	H	Purine Metabolism	Nitrogen disposal	-0.00352738	ATPM (1.85e+01, 1.85e+01); r0276 (9.71e-01, 9.96e-01); GMPR (9.69e-01, 9.94e-01); PRPPS (3.68e-02, 3.68e-02); PRAGSr (6.71e-03, 6.71e-03); GARFT (6.71e-03, 6.71e-03); PRFGS (6.71e-03, 6.71e-03); AIRCr (6.71e-03, 6.71e-03); PRASCS (6.71e-03, 6.71e-03); ADSS (4.61e-03, 4.61e-03)
mlthf	5,10-Methylenetetrahydrofolate	CH2-THF	Methane Metabolism	Methane Metabolism	-0.740843	GHMT2rm (5.29e-01, 8.83e-01)
glutcoa	glutaryl-CoA(5-)	Glutaryl-CoA	Lysine Metabolism	AA other (Cys/Met/Lys/Arg/Pro)	-6	2OXOADOXm (0.00e+00, 9.19e-03)
nh4	Ammonium	NH4	Pseudoreactions	Pseudoreactions	-0.0363114	EX_nh4_e (9.85e-01, 1.01e+00)
oaa	Oxaloacetate	Oxaloacetate	Biosynthesis Of Amino Acids	Biosynthesis Of Amino Acids	1.56021	PCm (3.32e-01, 9.67e-02); CSm (3.32e-01, 0.00e+00); ASPTAm (0.00e+00, 9.67e-02); ASPTA (4.77e-02, 4.77e-02)
mmcoa_R	(R)-methylmalonyl-CoA(5-)	(R)-methylmalonyl-CoA(5-)	Glyoxylate And Dicarboxylate Metabolism	Glyoxylate And Dicarboxylate Metabolism	-3.19225e-11	MMMm (4.73e-02, 4.73e-02); MMEm (4.73e-02, 4.73e-02)
pi	hydrogenphosphate	HPO4	Fatty Acid Metabolism	Lipid metabolism	-2.32668e-11	ACCOACm (1.29e-01, 1.29e-01)
atp	ATP	ATP/ADP	Purine Metabolism	Nitrogen disposal	4.93007e-13	ATPM (1.85e+01, 1.85e+01); ADK1 (3.75e-01, 3.75e-01); PRPPS (3.68e-02, 3.68e-02); GK1 (2.65e-02, 2.65e-02); PRAGSr (6.71e-03, 6.71e-03); PRFGS (6.71e-03, 6.71e-03); PRASCS (6.71e-03, 6.71e-03); NDPK1 (5.85e-03, 5.85e-03); NDPK8 (2.39e-03, 2.39e-03); NDPK10 (1.20e-03, 1.20e-03); NDPK10n (1.20e-03, 1.20e-03); NDPK8m (1.20e-03, 1.20e-03); NDPK5 (8.62e-04, 8.62e-04)
co2	carbon dioxide	CO2	Citric Acid Cycle	Central Energy Metabolism	1.2116	AKGDm (8.78e-01, 5.22e-01); ICDHxm (3.32e-01, 0.00e+00)
h2o	Water	H2O	Lysine Degradation	AA other (Cys/Met/Lys/Arg/Pro)	-6	r0525 (0.00e+00, 9.19e-03); ECOAH1m (0.00e+00, 9.19e-03); SACCD3m (0.00e+00, 9.19e-03)
adp	ADP	ATP/ADP	Citric Acid Cycle	Central Energy Metabolism	0.915802	SUCOASm (9.26e-01, 5.70e-01); PCm (3.32e-01, 9.67e-02)
ser__L	L-serine	L-ser	Glyoxylate And Dicarboxylate Metabolism	Glyoxylate And Dicarboxylate Metabolism	-0.740843	GHMT2rm (5.29e-01, 8.83e-01)
accoa	Acetyl-CoA	Acetyl-CoA	Fatty Acid Degradation	Lipid metabolism	0.0931094	ACCOACm (1.29e-01, 1.29e-01); ACACT1r (9.19e-03, 9.19e-03); ACACT1rm (9.19e-03, 0.00e+00)
gar	N1-(5-Phospho-D-ribosyl)glycinamide	N1-(5-Phospho-D-ribosyl)glycinamide	Purine Metabolism	Nitrogen disposal	9.65128e-11	PRAGSr (6.71e-03, 6.71e-03); GARFT (6.71e-03, 6.71e-03)
pgp_hs	phosphatidyl glycerol phosphate	Phosphatidyl glycerol phosphate	Transport, Mitochondrial	Mitochondrial transport	2.36573e-11	HUMANGEM_MAR11363 (2.77e-04, 2.77e-04)
tag_hs	triglyceride	Triglyceride	Triacylglycerol Synthesis	Lipid metabolism	2.36583e-11	DGAT (3.70e-04, 3.70e-04)
HC01376	S-(2-Methylbutanoyl)-dihydrolipoamide	S-(2-Methylbutanoyl)-dihydrolipoamide	Valine, Leucine And Isoleucine Biosynthesis	BCAA metabolism (Val/Leu/Iso)	-1.63801e-11	r0670 (3.20e-02, 3.20e-02); r0604 (3.20e-02, 3.20e-02)
fum	Fumarate	Fumarate	Purine Synthesis	Nucleotide metabolism	9.65154e-11	ADSL2 (6.71e-03, 6.71e-03)
aicar	5-Amino-1-(5-Phospho-D-ribosyl)imidazole-4-carboxamide	5-Amino-1-(5-Phospho-D-ribosyl)imidAzole-4-carboxamide	Purine Synthesis	Nucleotide metabolism	9.65148e-11	AICART (6.71e-03, 6.71e-03); ADSL2 (6.71e-03, 6.71e-03)
lpam	lipoamide	Lipoamide	Valine, Leucine And Isoleucine Biosynthesis	BCAA metabolism (Val/Leu/Iso)	-2.84467e-11	r0670 (3.20e-02, 3.20e-02); r0385 (1.53e-02, 1.53e-02)
co2	carbon dioxide	CO2	Lysine Metabolism	AA other (Cys/Met/Lys/Arg/Pro)	-6	2OXOADOXm (0.00e+00, 9.19e-03)
accoa	Acetyl-CoA	Acetyl-CoA	Lysine Degradation	AA other (Cys/Met/Lys/Arg/Pro)	1	ACACT1r (9.19e-03, 9.19e-03); ACACT1rm (9.19e-03, 0.00e+00)
glutcoa	glutaryl-CoA(5-)	Glutaryl-CoA	2-oxocarboxylic Acid Metabolism	2-oxocarboxylic Acid Metabolism	-6	2OXOADOXm (0.00e+00, 9.19e-03)
co2	carbon dioxide	CO2	Valine, Leucine And Isoleucine Degradation	BCAA metabolism (Val/Leu/Iso)	-5.37021e-11	MMSAD1m (1.53e-02, 1.53e-02)
ditp	dITP(4-)	DITP	Nucleotide Metabolism	Nucleotide metabolism	-1.13494e-10	NDPK10 (1.20e-03, 1.20e-03); NDPK10n (1.20e-03, 1.20e-03)
h2o	Water	H2O	Synthesis And Degradation Of Ketone Bodies	Lipid metabolism	-2.3267e-11	HMGCOASim (9.19e-03, 9.19e-03)
cmp	CMP	CMP	Nucleotide Metabolism	Nucleotide metabolism	-1.00178e-11	CYTDK1 (7.52e-03, 7.52e-03); CYTK1 (1.72e-03, 1.72e-03); CYTK1m (5.02e-04, 5.02e-04)
pi	hydrogenphosphate	HPO4	Arginine Biosynthesis	AA other (Cys/Met/Lys/Arg/Pro)	-3.91896e-11	r0034 (5.22e-03, 5.22e-03)
ile__L	L-isoleucine	L-isoleucine	Extracellular Transport	Extracellular Transport	-1.74491e-12	ILEtec (5.00e-02, 5.00e-02); r1402 (8.78e-04, 8.78e-04)
ficytC	Ferricytochrome c	Ferricytochrome c	Oxidative Phosphorylation	Oxidative Phosphorylation	-0.0804183	CYOR_u10m (7.12e+00, 7.53e+00); CYOOm3 (3.56e+00, 3.77e+00)
asp__L	L-aspartate(1-)	L-aspartate(1-)	2-oxocarboxylic Acid Metabolism	2-oxocarboxylic Acid Metabolism	-1.59712	ASPTAm (0.00e+00, 9.67e-02); ASPTA (4.77e-02, 4.77e-02)
2mop	2-methyl-3-oxopropanoate	2-Methyl-3-oxopropanoate	Valine, Leucine And Isoleucine Degradation	BCAA metabolism (Val/Leu/Iso)	-5.37021e-11	MMSAD1m (1.53e-02, 1.53e-02)
nh4	Ammonium	NH4	Glycine, Serine And Threonine Metabolism	AA central (A/D/E,G/S/T)	-0.740843	GCC2bim (5.29e-01, 8.83e-01)
g6p	D-Glucose 6-phosphate	D-Glucose 6-phosphate	Glycolysis/Gluconeogenesis	Central Energy Metabolism	-3.39563e-14	HEX1 (5.00e+00, 5.00e+00); PGI (4.98e+00, 4.98e+00); PGMT (2.63e-03, 2.63e-03)
pchol_hs	Phosphatidylcholine	Phosphatidylcholine	Sphingolipid Metabolism	Lipid metabolism	2.36419e-11	SMS (7.31e-04, 7.31e-04)
ru5p__D	D-ribulose 5-phosphate(2-)	D-ribulose 5-phosphate(2-)	Biosynthesis Of Amino Acids	Biosynthesis Of Amino Acids	3.71447e-11	RPI (1.19e-02, 1.19e-02)
accoa	Acetyl-CoA	Acetyl-CoA	Propanoate Metabolism	Propanoate Metabolism	-0.80841	ACCOACm (1.29e-01, 1.29e-01); MMSAD3m (0.00e+00, 9.67e-02)
nadh	Nicotinamide adenine dinucleotide - reduced	NAD(+)	Glycolysis/Gluconeogenesis	Central Energy Metabolism	0.0121247	GAPD (9.94e+00, 9.94e+00); GCC2cm (5.76e-01, 9.31e-01); PDHm (4.47e-01, 0.00e+00)
r1p	alpha-D-Ribose 1-phosphate	Alpha-D-Ribose 1-phosphate	Pyrimidine Metabolism	Nucleotide metabolism	-1.87457e-11	PYNP2r (2.32e-02, 2.32e-02)
co2	carbon dioxide	CO2	2-oxocarboxylic Acid Metabolism	2-oxocarboxylic Acid Metabolism	1.63969	AKGDm (8.78e-01, 5.22e-01); PDHm (4.47e-01, 0.00e+00); ICDHxm (3.32e-01, 0.00e+00); 2OXOADOXm (0.00e+00, 9.19e-03)
glu__L	L-glutamate(1-)	L-Glu	Lysine Metabolism	AA other (Cys/Met/Lys/Arg/Pro)	-6	r0525 (0.00e+00, 9.19e-03); r0450 (0.00e+00, 9.19e-03)
adp	ADP	ATP/ADP	Glyoxylate And Dicarboxylate Metabolism	Glyoxylate And Dicarboxylate Metabolism	-2.84467e-11	PPCOACm (4.73e-02, 4.73e-02)
pyr	pyruvate	Pyr	Glycolysis/Gluconeogenesis	Central Energy Metabolism	0.122278	PYK (9.41e+00, 9.06e+00); PDHm (4.47e-01, 0.00e+00)
dudp	dUDP	dUDP	Nucleotide Interconversion	Nucleotide metabolism	-1.7234e-11	URIDK2 (2.41e-02, 2.41e-02); r0531 (2.29e-02, 2.29e-02); NDPK6m (1.20e-03, 1.20e-03)
h2o	Water	H2O	Biomass And Maintenance Functions	Biomass And Maintenance Functions	4.35666e-14	ATPM (1.85e+01, 1.85e+01); BIOMASS_maintenance (3.42e-02, 3.42e-02)
h2o	Water	H2O	Pyrimidine Catabolism	Nucleotide metabolism	-1.72269e-11	CYTDe (1.54e-02, 1.54e-02); NTD2 (7.85e-03, 7.85e-03); DCMPDA (8.62e-04, 8.62e-04)
phpyr	keto-phenylpyruvate	Phenylpyruvate	Phenylalanine, Tyrosine And Tryptophan Biosynthesis	AAA metabolism (Trp/Phe/Tyr)	0.000241835	PHETA1 (1.10e+01, 1.10e+01); PHETA1m (1.10e+01, 1.10e+01)
accoa	Acetyl-CoA	Acetyl-CoA	Pyruvate Metabolism	Central Energy Metabolism	0.0931094	ACCOACm (1.29e-01, 1.29e-01); ACACT1r (9.19e-03, 9.19e-03); ACACT1rm (9.19e-03, 0.00e+00)
betald	betaine aldehyde	Betaine aldehyde	Alanine, Aspartate And Glutamate Metabolism	AA central (A/D/E,G/S/T)	-0.0251411	r0552m (2.79e+00, 2.84e+00); r0553m (2.79e+00, 2.84e+00); r0552 (1.26e+00, 1.28e+00); r0553 (1.26e+00, 1.28e+00)
q10h2	Ubiquinol-10	Ubiquinol-10	Tryptophan Metabolism	AAA metabolism (Trp/Phe/Tyr)	-6	r0541 (0.00e+00, 9.19e-03)
pep	Phosphoenolpyruvate	Phosphoenolpyruvate	Biosynthesis Of Amino Acids	Biosynthesis Of Amino Acids	0.0554195	PYK (9.41e+00, 9.06e+00); ENO (9.41e+00, 9.06e+00)
Rtotal	R total	R total	Extracellular Transport	Extracellular Transport	-1.277e-11	RTOTALt (9.00e-03, 9.00e-03); CHOLESTle (9.00e-03, 9.00e-03)
ura	uracil	Uracil	Nucleotide Interconversion	Nucleotide metabolism	-1.87457e-11	DURIPP (2.32e-02, 2.32e-02)
pi	hydrogenphosphate	HPO4	Extracellular Transport	Extracellular Transport	-1.89095e-11	PIt9 (5.38e-02, 5.38e-02); PCt (9.00e-03, 9.00e-03); PSFLIP (1.71e-03, 1.71e-03); r1402 (8.78e-04, 8.78e-04)
dttp	dTTP	dTTP	Nucleotide Metabolism	Nucleotide metabolism	2.36426e-11	NDPK4n (1.20e-03, 1.20e-03)
met__L	L-methionine	L-Met	Extracellular Transport	Extracellular Transport	2.36522e-11	METtec (1.07e-02, 1.07e-02); r1402 (8.78e-04, 8.78e-04)
coa	Coenzyme A	CoA	Citric Acid Cycle	Central Energy Metabolism	0.967447	SUCOASm (9.26e-01, 5.70e-01); AKGDm (8.78e-01, 5.22e-01); CSm (3.32e-01, 0.00e+00)
ctp	CTP	CTP	Pyrimidine Metabolism	Nucleotide metabolism	-8.27894e-12	CTPS2 (1.84e-02, 1.84e-02); NDPK3m (2.13e-03, 2.13e-03)
r5p	alpha-D-Ribose 5-phosphate	Alpha-D-Ribose 5-phosphate	Biosynthesis Of Amino Acids	Biosynthesis Of Amino Acids	1.34342e-11	PRPPS (3.68e-02, 3.68e-02); RPI (1.19e-02, 1.19e-02)
asn__L	L-asparagine	L-asparagine	Extracellular Transport	Extracellular Transport	2.36515e-11	ASNtN1 (1.70e-02, 0.00e+00); ASNt4 (0.00e+00, 1.70e-02); r1402 (8.78e-04, 8.78e-04)
akg	2-Oxoglutarate	Î±-KG	Lysine Degradation	AA other (Cys/Met/Lys/Arg/Pro)	-6	r0450 (0.00e+00, 9.19e-03); SACCD3m (0.00e+00, 9.19e-03)
datp	dATP	dATP	Nucleotide Interconversion	Nucleotide metabolism	2.36426e-11	NDPK8 (2.39e-03, 2.39e-03); ADKd (1.20e-03, 1.20e-03); NDPK8m (1.20e-03, 1.20e-03)
accoa	Acetyl-CoA	Acetyl-CoA	Fatty Acid Biosynthesis	Lipid metabolism	-2.3267e-11	ACCOACm (1.29e-01, 1.29e-01); FAS80COA__L (1.84e-02, 1.84e-02)
glygn2	glycogen, structure 2 (glycogenin-1,6-{7[1,4-Glc], 4[1,4-Glc]})	Glycogen, structure 2 (glycogenin-1,6-{7[1,4-Glc], 4[1,4-Glc]})	Starch And Sucrose Metabolism	Starch And Sucrose Metabolism	2.36432e-11	GLBRAN (8.78e-04, 8.78e-04)
arg__L	L-argininium(1+)	Arg	Pseudoreactions	Pseudoreactions	2.36503e-11	EX_arg__L_e (1.99e-02, 1.99e-02)
h	proton	H	Nucleotide Metabolism	Nucleotide metabolism	-0.00353503	ATPM (1.85e+01, 1.85e+01); r0276 (9.71e-01, 9.96e-01); GMPR (9.69e-01, 9.94e-01); CTPS2 (1.84e-02, 1.84e-02); CYTDK1 (7.52e-03, 7.52e-03); ADSS (4.61e-03, 4.61e-03)
glu__L	L-glutamate(1-)	L-Glu	2-oxocarboxylic Acid Metabolism	2-oxocarboxylic Acid Metabolism	-0.00461353	PHETA1m (1.10e+01, 1.10e+01); PHETA1 (1.10e+01, 1.10e+01); ASPTAm (0.00e+00, 9.67e-02); ASPTA (4.77e-02, 4.77e-02); ILETA (3.20e-02, 3.20e-02); ALATA__L (3.11e-02, 0.00e+00); VALTA (1.53e-02, 1.53e-02); r0450 (0.00e+00, 9.19e-03)
nadp	Nicotinamide adenine dinucleotide phosphate	NADP(+)	Glycine, Serine And Threonine Metabolism	AA central (A/D/E,G/S/T)	-0.0251411	r0553m (2.79e+00, 2.84e+00); r0553 (1.26e+00, 1.28e+00)
ser__L	L-serine	L-ser	Glycine, Serine And Threonine Metabolism	AA central (A/D/E,G/S/T)	-0.740843	PSP__Lm (5.29e-01, 8.83e-01); GHMT2rm (5.29e-01, 8.83e-01)
datp	dATP	dATP	Purine Metabolism	Nitrogen disposal	2.36426e-11	NDPK8 (2.39e-03, 2.39e-03); NDPK8m (1.20e-03, 1.20e-03)
atp	ATP	ATP/ADP	Nucleotide Metabolism	Nucleotide metabolism	3.35399e-13	ATPM (1.85e+01, 1.85e+01); ADK1 (3.75e-01, 3.75e-01); GK1 (2.65e-02, 2.65e-02); URIDK2 (2.41e-02, 2.41e-02); CTPS2 (1.84e-02, 1.84e-02); R_group_phosphotase_1 (1.80e-02, 1.80e-02); CYTDK1 (7.52e-03, 7.52e-03); NDPK1 (5.85e-03, 5.85e-03); NDPK8 (2.39e-03, 2.39e-03); NDPK3m (2.13e-03, 2.13e-03); CYTK1 (1.72e-03, 1.72e-03); NDPK10 (1.20e-03, 1.20e-03); NDPK10n (1.20e-03, 1.20e-03); NDPK6m (1.20e-03,…
orot	Orotate	Orotate	Pyrimidine Synthesis	Nucleotide metabolism	-3.91896e-11	ORPT (5.22e-03, 5.22e-03)
h	proton	H	Glycolysis/Gluconeogenesis	Central Energy Metabolism	-9.77045e-14	GAPD (9.94e+00, 9.94e+00); PYK (9.41e+00, 9.06e+00); HEX1 (5.00e+00, 5.00e+00); PFK (4.98e+00, 4.98e+00); GCC2cm (5.76e-01, 9.31e-01)
coa	Coenzyme A	CoA	Lysine Metabolism	AA other (Cys/Met/Lys/Arg/Pro)	-6	2OXOADOXm (0.00e+00, 9.19e-03)
o2s	superoxide	Superoxide	Transport, Mitochondrial	Mitochondrial transport	-0.0804183	O2Stm (7.12e-02, 7.53e-02)
cmp	CMP	CMP	Glycerophospholipid Metabolism	Lipid metabolism	-1.36628e-11	CEPTC (1.65e-02, 1.65e-02); CDIPTr (6.22e-04, 6.22e-04); PGPPTm (2.77e-04, 2.77e-04); CLSm_hs (2.26e-04, 2.26e-04)
atp	ATP	ATP/ADP	Glycolysis/Gluconeogenesis	Central Energy Metabolism	0.017556	PGK (9.94e+00, 9.94e+00); PYK (9.41e+00, 9.06e+00); HEX1 (5.00e+00, 5.00e+00); PFK (4.98e+00, 4.98e+00)
gmp	GMP	GMP	Nucleotide Salvage Pathway	Nucleotide Salvage Pathway	-9.27664e-12	GUAPRT (2.49e-02, 2.49e-02)
Rtotal2coa	R total 2 coenzyme A	R total 2 coenzyme A	Triacylglycerol Synthesis	Lipid metabolism	-1.4316e-11	AGPAT1 (1.73e-02, 1.73e-02)
nh4	Ammonium	NH4	Purine Catabolism	Purine Catabolism	-0.0368328	r0276 (9.71e-01, 9.96e-01)
akg	2-Oxoglutarate	Î±-KG	Propanoate Metabolism	Propanoate Metabolism	-6	APAT2rm (0.00e+00, 9.67e-02)
nadh	Nicotinamide adenine dinucleotide - reduced	NAD(+)	Glycerophospholipid Metabolism	Lipid metabolism	-6.84873	r0202c (8.55e-03, 9.85e-01)
ascb__L	L-ascorbate	L-ascorbate	Ascorbate And Aldarate Metabolism	Ascorbate And Aldarate Metabolism	-0.0804183	DASCBR (3.56e-02, 3.77e-02)
pi	hydrogenphosphate	HPO4	Alanine, Aspartate And Glutamate Metabolism	AA central (A/D/E,G/S/T)	-0.724716	PSP__Lm (5.29e-01, 8.83e-01); ASPCTr (5.22e-03, 5.22e-03); r0034 (5.22e-03, 5.22e-03); ADSS (4.61e-03, 4.61e-03)
dtdp	dTDP	dTDP	Pyrimidine Metabolism	Nucleotide metabolism	2.36426e-11	NDPK4n (1.20e-03, 1.20e-03)
h2o	Water	H2O	Transport, Mitochondrial	Mitochondrial transport	-0.0708044	H2Otm (1.37e+01, 1.44e+01)
h	proton	H	Pyrimidine Synthesis	Nucleotide metabolism	-2.44803e-11	CTPS2 (1.84e-02, 1.84e-02); OMPDC (5.22e-03, 5.22e-03); DHORTS (5.22e-03, 5.22e-03); ASPCTr (5.22e-03, 5.22e-03)
hco3	Bicarbonate	HCO3	Glyoxylate And Dicarboxylate Metabolism	Glyoxylate And Dicarboxylate Metabolism	-2.84467e-11	PPCOACm (4.73e-02, 4.73e-02)
phe__L	L-phenylalanine	L-Phe	Pseudoreactions	Pseudoreactions	2.38479e-11	EX_phe__L_e (2.33e-02, 2.33e-02)
o2	O2	O2	Tryptophan Metabolism	AAA metabolism (Trp/Phe/Tyr)	9.65144e-11	KYN3OX (1.34e-02, 1.34e-02); TRPO2 (1.34e-02, 1.34e-02)
coa	Coenzyme A	CoA	Glyoxylate And Dicarboxylate Metabolism	Glyoxylate And Dicarboxylate Metabolism	5.25087	CSm (3.32e-01, 0.00e+00); ACACT1r (9.19e-03, 9.19e-03); ACACT1rm (9.19e-03, 0.00e+00)
atp	ATP	ATP/ADP	Pyrimidine Synthesis	Nucleotide metabolism	-1.19744e-11	CTPS2 (1.84e-02, 1.84e-02)
2pg	D-Glycerate 2-phosphate	D-Glycerate 2-phosphate	Glycine, Serine And Threonine Metabolism	AA central (A/D/E,G/S/T)	0.0554195	PGM (9.41e+00, 9.06e+00)
h2o	Water	H2O	Cyanoamino Acid Metabolism	Cyanoamino Acid Metabolism	-0.740843	GHMT2rm (5.29e-01, 8.83e-01)
coa	Coenzyme A	CoA	2-oxocarboxylic Acid Metabolism	2-oxocarboxylic Acid Metabolism	1.63969	AKGDm (8.78e-01, 5.22e-01); PDHm (4.47e-01, 0.00e+00); CSm (3.32e-01, 0.00e+00); 2OXOADOXm (0.00e+00, 9.19e-03)
dhlam	dihydrolipoamide	Dihydrolipoamide	Valine, Leucine And Isoleucine Biosynthesis	BCAA metabolism (Val/Leu/Iso)	-2.84466e-11	r0604 (3.20e-02, 3.20e-02); r0561 (1.53e-02, 1.53e-02)
co2	carbon dioxide	CO2	Arginine Biosynthesis	AA other (Cys/Met/Lys/Arg/Pro)	-3.91896e-11	r0034 (5.22e-03, 5.22e-03)
q10h2	Ubiquinol-10	Ubiquinol-10	Transport, Mitochondrial	Mitochondrial transport	-3.91896e-11	DHORD9 (5.22e-03, 5.22e-03)
3mob	3-methyl-2-oxobutanoate	Î±-Ketoisovalerate	Valine, Leucine And Isoleucine Degradation	BCAA metabolism (Val/Leu/Iso)	-5.37022e-11	VALTA (1.53e-02, 1.53e-02)
ru5p__D	D-ribulose 5-phosphate(2-)	D-ribulose 5-phosphate(2-)	Glutathione Metabolism	Redox & Pentose Metabolism	3.71447e-11	GND (1.19e-02, 1.19e-02)
prpp	5-Phospho-alpha-D-ribose 1-diphosphate	5-Phospho-alpha-D-ribose 1-diphosphate	Purine Metabolism	Nitrogen disposal	9.1823e-12	PRPPS (3.68e-02, 3.68e-02); GUAPRT (2.49e-02, 2.49e-02); GLUPRT (6.71e-03, 6.71e-03)
his__L	L-histidine	L-histidine	Biomass And Maintenance Functions	Biomass And Maintenance Functions	2.36426e-11	BIOMASS_maintenance (3.42e-02, 3.42e-02)
ppcoa	Propanoyl-CoA	Propanoyl-CoA	Glyoxylate And Dicarboxylate Metabolism	Glyoxylate And Dicarboxylate Metabolism	-2.84467e-11	PPCOACm (4.73e-02, 4.73e-02)
for	Formate	Formate	Tryptophan Metabolism	AAA metabolism (Trp/Phe/Tyr)	9.65141e-11	FKYNH (1.34e-02, 1.34e-02)
nadph	Nicotinamide adenine dinucleotide phosphate - reduced	NADP(+)	Lysine Metabolism	AA other (Cys/Met/Lys/Arg/Pro)	-6	SACCD3m (0.00e+00, 9.19e-03)
h2o	Water	H2O	Glutathione Metabolism	Redox & Pentose Metabolism	1.03692	r0129 (3.31e-02, 1.85e-02); AMPTASECG (3.31e-02, 1.85e-02); r0130 (9.76e-03, 0.00e+00)
succoa	Succinyl-CoA	Succinyl-CoA	Citric Acid Cycle	Central Energy Metabolism	0.72403	SUCOASm (9.26e-01, 5.70e-01); AKGDm (8.78e-01, 5.22e-01)
pi	hydrogenphosphate	HPO4	Purine Synthesis	Nucleotide metabolism	9.65138e-11	PRFGS (6.71e-03, 6.71e-03); PRAGSr (6.71e-03, 6.71e-03); r0666 (6.71e-03, 6.71e-03); PRASCS (6.71e-03, 6.71e-03)
q10h2	Ubiquinol-10	Ubiquinol-10	Valine, Leucine And Isoleucine Biosynthesis	BCAA metabolism (Val/Leu/Iso)	-2.84467e-11	r0603 (3.20e-02, 3.20e-02); r0560 (1.53e-02, 1.53e-02)
phpyr	keto-phenylpyruvate	Phenylpyruvate	Biosynthesis Of Amino Acids	Biosynthesis Of Amino Acids	0.000241835	PHETA1 (1.10e+01, 1.10e+01); PHETA1m (1.10e+01, 1.10e+01)
gsn	Guanosine	Guanosine	Transport, Mitochondrial	Mitochondrial transport	3.50047e-10	HUMANGEM_MAR05036 (5.02e-04, 5.02e-04)
3hibutcoa	(S)-3-Hydroxyisobutyryl-CoA	(S)-3-Hydroxyisobutyryl-CoA	Valine, Leucine And Isoleucine Biosynthesis	BCAA metabolism (Val/Leu/Iso)	-5.37022e-11	3HBCOAHLm (1.53e-02, 1.53e-02); ECOAH12m (1.53e-02, 1.53e-02)
dutp	dUTP	DUTP	Pyrimidine Metabolism	Nucleotide metabolism	2.36416e-11	NDPK6m (1.20e-03, 1.20e-03)
h	proton	H	Glycerophospholipid Metabolism	Lipid metabolism	-3.48262	r0202c (8.55e-03, 9.85e-01); CHOLK (1.65e-02, 1.65e-02); CHLPCTD (1.65e-02, 1.65e-02); CEPTC (1.65e-02, 1.65e-02); DAGK_hs (1.61e-02, 1.61e-02); GPDDA1 (9.00e-03, 9.00e-03); LPASE (9.00e-03, 9.00e-03); PSDm_hs (1.71e-03, 1.71e-03); CDS (1.12e-03, 1.12e-03); CDIPTr (6.22e-04, 6.22e-04); PGPPTm (2.77e-04, 2.77e-04); CLSm_hs (2.26e-04, 2.26e-04)
glyb	glycine betaine	Glycine betaine	Folate Metabolism	Folate Metabolism	-0.0308489	r0552 (1.26e+00, 1.28e+00); r0553 (1.26e+00, 1.28e+00)
cit	Citrate	Citrate	Biosynthesis Of Amino Acids	Biosynthesis Of Amino Acids	6	CSm (3.32e-01, 0.00e+00); ACONTm (3.32e-01, 0.00e+00)
nadp	Nicotinamide adenine dinucleotide phosphate	NADP(+)	Purine Catabolism	Purine Catabolism	-0.0368328	r0276 (9.71e-01, 9.96e-01)
ppi	Diphosphate	PPi	Extracellular Transport	Extracellular Transport	2.36567e-11	r1402 (8.78e-04, 8.78e-04)
focytC	Ferrocytochrome C	Ferrocytochrome C	Oxidative Phosphorylation	Oxidative Phosphorylation	-0.0804183	CYOR_u10m (7.12e+00, 7.53e+00); CYOOm3 (3.56e+00, 3.77e+00)
g1p	D-Glucose 1-phosphate	D-Glucose 1-phosphate	Glycolysis/Gluconeogenesis	Central Energy Metabolism	-3.86367e-11	PGMT (2.63e-03, 2.63e-03)
atp	ATP	ATP/ADP	Glycerophospholipid Metabolism	Lipid metabolism	-1.66535e-11	CHOLK (1.65e-02, 1.65e-02); DAGK_hs (1.61e-02, 1.61e-02)
dudp	dUDP	dUDP	Nucleotide Metabolism	Nucleotide metabolism	-1.52989e-11	URIDK2 (2.41e-02, 2.41e-02); NDPK6m (1.20e-03, 1.20e-03)
mmcoa_S	(S)-methylmalonyl-CoA(5-)	(S)-methylmalonyl-CoA(5-)	Valine, Leucine And Isoleucine Biosynthesis	BCAA metabolism (Val/Leu/Iso)	-3.01846e-11	PPCOACm (4.73e-02, 4.73e-02); MMEm (4.73e-02, 4.73e-02)
nad	Nicotinamide adenine dinucleotide	NAD(+)	Lysine Degradation	AA other (Cys/Met/Lys/Arg/Pro)	-6	r0525 (0.00e+00, 9.19e-03); HACD1m (0.00e+00, 9.19e-03)
val__L	L-valine	L-Val	Pantothenate And Coa Biosynthesis	Pantothenate And Coa Biosynthesis	-5.37022e-11	VALTA (1.53e-02, 1.53e-02)
co2	carbon dioxide	CO2	Extracellular Transport	Extracellular Transport	1.00595	CO2t (1.33e+00, 6.64e-01)
g3p	Glyceraldehyde 3-phosphate	G3P	Pentose Phosphate Pathway	Redox & Pentose Metabolism	-8.05662e-14	FBA (4.98e+00, 4.98e+00)
ile__L	L-isoleucine	L-isoleucine	Biomass And Maintenance Functions	Biomass And Maintenance Functions	2.36426e-11	BIOMASS_maintenance (3.42e-02, 3.42e-02)
adp	ADP	ATP/ADP	Extracellular Transport	Extracellular Transport	-3.29439e-11	PCt (9.00e-03, 9.00e-03); PSFLIP (1.71e-03, 1.71e-03); r1402 (8.78e-04, 8.78e-04)
amp	AMP	AMP	Nucleotide Interconversion	Nucleotide metabolism	2.07726e-11	ADK1 (3.75e-01, 3.75e-01); ADSL1 (4.61e-03, 4.61e-03); NTD7 (1.20e-03, 1.20e-03)
ura	uracil	Uracil	Nucleotide Metabolism	Nucleotide metabolism	-1.87457e-11	PYNP2r (2.32e-02, 2.32e-02)
dcacoa	Decanoyl-CoA (n-C10:0CoA)	Decanoyl-CoA (n-C10:0CoA)	Fatty Acid Biosynthesis	Lipid metabolism	-2.32666e-11	FAS100COA (1.84e-02, 1.84e-02); FAS120COA (1.84e-02, 1.84e-02)
amp	AMP	AMP	Purine Metabolism	Nitrogen disposal	1.9447e-11	ADK1 (3.75e-01, 3.75e-01); PRPPS (3.68e-02, 3.68e-02); ADSL1 (4.61e-03, 4.61e-03); NTD7 (1.20e-03, 1.20e-03)
dump	dUMP	DUMP	Pyrimidine Metabolism	Nucleotide metabolism	-1.72338e-11	URIDK2 (2.41e-02, 2.41e-02)
imp	IMP	IMP	Nucleotide Interconversion	Nucleotide metabolism	-0.0367388	GMPR (9.69e-01, 9.94e-01); ADSS (4.61e-03, 4.61e-03)
trp__L	L-tryptophan	L-tryptophan	Extracellular Transport	Extracellular Transport	6.8322e-11	TRPt (2.14e-02, 2.14e-02); r1402 (8.78e-04, 8.78e-04)
datp	dATP	dATP	Nucleotide Metabolism	Nucleotide metabolism	2.36426e-11	NDPK8 (2.39e-03, 2.39e-03); NDPK8m (1.20e-03, 1.20e-03)
utp	UTP	UTP	Pyrimidine Metabolism	Nucleotide metabolism	-1.19744e-11	CTPS2 (1.84e-02, 1.84e-02)
cbp	Carbamoyl phosphate	Carbamoyl phosphate	Arginine Biosynthesis	AA other (Cys/Met/Lys/Arg/Pro)	-3.91896e-11	r0034 (5.22e-03, 5.22e-03)
udp	UDP	UDP	Nucleotide Interconversion	Nucleotide metabolism	2.3657e-11	UMPK2m (2.63e-03, 2.63e-03)
13dpg	3-Phospho-D-glyceroyl phosphate	3-Phospho-D-glyceroyl phosphate	Glycolysis/Gluconeogenesis	Central Energy Metabolism	-6.80728e-14	PGK (9.94e+00, 9.94e+00); GAPD (9.94e+00, 9.94e+00)
lys__L	L-lysinium(1+)	Lys	Pseudoreactions	Pseudoreactions	-0.435307	EX_lys__L_e (2.61e-02, 3.53e-02)
succoa	Succinyl-CoA	Succinyl-CoA	Glyoxylate And Dicarboxylate Metabolism	Glyoxylate And Dicarboxylate Metabolism	-3.19226e-11	MMMm (4.73e-02, 4.73e-02)
glu__L	L-glutamate(1-)	L-Glu	Extracellular Transport	Extracellular Transport	0.255277	GLUt4 (5.98e-02, 5.00e-02); r1402 (8.78e-04, 8.78e-04)
succoa	Succinyl-CoA	Succinyl-CoA	2-oxocarboxylic Acid Metabolism	2-oxocarboxylic Acid Metabolism	0.749569	AKGDm (8.78e-01, 5.22e-01)
ppi	Diphosphate	PPi	Alanine, Aspartate And Glutamate Metabolism	AA central (A/D/E,G/S/T)	9.65141e-11	GLUPRT (6.71e-03, 6.71e-03)
3pg	3-Phospho-D-glycerate	3-PG	Glycolysis/Gluconeogenesis	Central Energy Metabolism	0.0266872	PGK (9.94e+00, 9.94e+00); PGM (9.41e+00, 9.06e+00)
pi	hydrogenphosphate	HPO4	Biomass And Maintenance Functions	Biomass And Maintenance Functions	4.35666e-14	ATPM (1.85e+01, 1.85e+01); BIOMASS_maintenance (3.42e-02, 3.42e-02)
2dr1p	2-Deoxy-D-ribose 1-phosphate	2-Deoxy-D-ribose 1-phosphate	Nucleotide Interconversion	Nucleotide metabolism	-1.87457e-11	DURIPP (2.32e-02, 2.32e-02)
gln__L	L-glutamine	L-Gln	Arginine Biosynthesis	AA other (Cys/Met/Lys/Arg/Pro)	-3.48933e-12	GLUNm (4.48e-01, 4.48e-01)
pi	hydrogenphosphate	HPO4	Biosynthesis Of Amino Acids	Biosynthesis Of Amino Acids	1.72493	PCm (3.32e-01, 9.67e-02); r0034 (5.22e-03, 5.22e-03)
met__L	L-methionine	L-Met	Biomass And Maintenance Functions	Biomass And Maintenance Functions	2.36426e-11	BIOMASS_maintenance (3.42e-02, 3.42e-02)
phpyr	keto-phenylpyruvate	Phenylpyruvate	Transport, Mitochondrial	Mitochondrial transport	0.000241835	HUMANGEM_MAR11443 (1.10e+01, 1.10e+01)
clpn_hs	cardiolipin	Cardiolipin	Glycerophospholipid Metabolism	Lipid metabolism	2.36563e-11	CLSm_hs (2.26e-04, 2.26e-04)
co2	carbon dioxide	CO2	Alanine, Aspartate And Glutamate Metabolism	AA central (A/D/E,G/S/T)	-0.735169	GCC2am (5.29e-01, 8.83e-01); r0034 (5.22e-03, 5.22e-03)
gmp	GMP	GMP	Transport, Mitochondrial	Mitochondrial transport	-0.0368516	HUMANGEM_MAR20139 (9.71e-01, 9.96e-01)
2dr1p	2-Deoxy-D-ribose 1-phosphate	2-Deoxy-D-ribose 1-phosphate	Purine Metabolism	Nitrogen disposal	-1.47939e-11	PUNP4 (2.44e-02, 2.44e-02); PUNP2 (1.20e-03, 1.20e-03)
asn__L	L-asparagine	L-asparagine	Biomass And Maintenance Functions	Biomass And Maintenance Functions	2.36426e-11	BIOMASS_maintenance (3.42e-02, 3.42e-02)
adp	ADP	ATP/ADP	Alanine, Aspartate And Glutamate Metabolism	AA central (A/D/E,G/S/T)	-3.91896e-11	r0034 (5.22e-03, 5.22e-03)
uri	Uridine	Uridine	Pyrimidine Metabolism	Nucleotide metabolism	-1.85856e-11	PYNP2r (2.32e-02, 2.32e-02); NTD2 (7.85e-03, 7.85e-03)
h2o	Water	H2O	Nucleotide Interconversion	Nucleotide metabolism	-1.03576e-11	RNDR2 (2.53e-02, 2.53e-02); NTD8 (2.44e-02, 2.44e-02); r0475 (2.29e-02, 2.29e-02); RNDR3 (1.72e-03, 1.72e-03); NTD7 (1.20e-03, 1.20e-03); DUTPDPm (1.20e-03, 1.20e-03); NTD9m (5.02e-04, 5.02e-04)
h	proton	H	Pseudoreactions	Pseudoreactions	-0.10173	EX_h_e (9.89e+00, 1.06e+01)
datp	dATP	dATP	Pyrimidine Synthesis	Nucleotide metabolism	2.36422e-11	RE0452M (1.20e-03, 1.20e-03)
cdpchol	CDPcholine	CDPcholine	Glycerophospholipid Metabolism	Lipid metabolism	-1.62121e-11	CHLPCTD (1.65e-02, 1.65e-02); CEPTC (1.65e-02, 1.65e-02)
prpp	5-Phospho-alpha-D-ribose 1-diphosphate	5-Phospho-alpha-D-ribose 1-diphosphate	Nucleotide Metabolism	Nucleotide metabolism	-9.27664e-12	GUAPRT (2.49e-02, 2.49e-02)
hmgcoa	Hydroxymethylglutaryl-CoA	HMG-CoA	Cholesterol Metabolism	Lipid metabolism	-2.3267e-11	HMGLm (9.19e-03, 9.19e-03)
nadp	Nicotinamide adenine dinucleotide phosphate	NADP(+)	Pyruvate Metabolism	Central Energy Metabolism	3.13604	ME2m (7.69e-01, 8.75e-02)
utp	UTP	UTP	Pentose And Glucuronate Interconversions	Redox & Pentose Metabolism	-3.86367e-11	GALU (2.63e-03, 2.63e-03)
h2o	Water	H2O	Purine Metabolism	Nitrogen disposal	9.28994e-14	ATPM (1.85e+01, 1.85e+01); NTD8 (2.44e-02, 2.44e-02); PRFGS (6.71e-03, 6.71e-03); GLUPRT (6.71e-03, 6.71e-03); IMPC (6.71e-03, 6.71e-03); NTD7 (1.20e-03, 1.20e-03)
gln__L	L-glutamine	L-Gln	Extracellular Transport	Extracellular Transport	2.08223e-14	GLNtN1 (4.00e-01, 4.90e-01); GLNt4 (7.60e-02, 0.00e+00); CYSGLUexR (2.42e-02, 9.61e-03); r1402 (8.78e-04, 8.78e-04)
co2	carbon dioxide	CO2	Purine Synthesis	Nucleotide metabolism	9.65157e-11	AIRCr (6.71e-03, 6.71e-03)
ppi	Diphosphate	PPi	Nucleotide Salvage Pathway	Nucleotide Salvage Pathway	-9.27664e-12	GUAPRT (2.49e-02, 2.49e-02)
cbp	Carbamoyl phosphate	Carbamoyl phosphate	Urea Cycle	Nitrogen disposal	-3.91896e-11	r0034 (5.22e-03, 5.22e-03)
glu__L	L-glutamate(1-)	L-Glu	Phenylalanine, Tyrosine And Tryptophan Biosynthesis	AAA metabolism (Trp/Phe/Tyr)	0.000241835	PHETA1m (1.10e+01, 1.10e+01); PHETA1 (1.10e+01, 1.10e+01)
5aizc	5-amino-1-(5-phospho-D-ribosyl)imidazole-4-carboxylate	5-Amino-1-(5-phospho-D-ribosyl)imidAzole-4-carboxylate	Purine Synthesis	Nucleotide metabolism	9.65154e-11	AIRCr (6.71e-03, 6.71e-03); PRASCS (6.71e-03, 6.71e-03)
C02470	Xanthurenic acid	Xanthurenic acid	Extracellular Transport	Extracellular Transport	9.65141e-11	r1030 (1.34e-02, 1.34e-02)
Lfmkynr	N-formyl-L-kynurenine	N-formyl-L-kynurenine	Tryptophan Metabolism	AAA metabolism (Trp/Phe/Tyr)	9.65144e-11	FKYNH (1.34e-02, 1.34e-02); TRPO2 (1.34e-02, 1.34e-02)
nadp	Nicotinamide adenine dinucleotide phosphate	NADP(+)	Fatty Acid Biosynthesis	Lipid metabolism	-2.32666e-11	FAS140COA (1.84e-02, 1.84e-02); FAS100COA (1.84e-02, 1.84e-02); FAS80COA__L (1.84e-02, 1.84e-02); FAS120COA (1.84e-02, 1.84e-02); FAS160COA (1.84e-02, 1.84e-02)
ser__L	L-serine	L-ser	Biomass And Maintenance Functions	Biomass And Maintenance Functions	2.36426e-11	BIOMASS_maintenance (3.42e-02, 3.42e-02)
pram	5-Phospho-beta-D-ribosylamine	5-Phospho-beta-D-ribosylamine	Alanine, Aspartate And Glutamate Metabolism	AA central (A/D/E,G/S/T)	9.65141e-11	GLUPRT (6.71e-03, 6.71e-03)
2oxoadp	2-oxoadipate(2-)	Adipates	Lysine Degradation	AA other (Cys/Met/Lys/Arg/Pro)	-6	r0450 (0.00e+00, 9.19e-03)
3php	3-phosphonatooxypyruvate(3-)	3-PHP	Glycine, Serine And Threonine Metabolism	AA central (A/D/E,G/S/T)	-0.740843	PSERT (5.29e-01, 8.83e-01); PGCD (5.29e-01, 8.83e-01)
mal__L	(S)-malate(2-)	(S)-malate(2-)	Methane Metabolism	Methane Metabolism	-1.55488	MDH (1.68e-01, 4.94e-01)
2mbcoa	2-methylbutanoyl-CoA(4-)	2-Methylbutanoyl-CoA(4-)	Valine, Leucine And Isoleucine Biosynthesis	BCAA metabolism (Val/Leu/Iso)	-1.63804e-11	r0603 (3.20e-02, 3.20e-02); r0604 (3.20e-02, 3.20e-02)
nadh	Nicotinamide adenine dinucleotide - reduced	NAD(+)	Cysteine And Methionine Metabolism	AA other (Cys/Met/Lys/Arg/Pro)	-0.740843	PGCD (5.29e-01, 8.83e-01)
prpp	5-Phospho-alpha-D-ribose 1-diphosphate	5-Phospho-alpha-D-ribose 1-diphosphate	Pyrimidine Synthesis	Nucleotide metabolism	-3.91896e-11	ORPT (5.22e-03, 5.22e-03)
gsn	Guanosine	Guanosine	Purine Metabolism	Nitrogen disposal	3.50047e-10	PUNP3 (5.02e-04, 5.02e-04)
pser__L	O-Phospho-L-serine	O-Phospho-L-serine	Cysteine And Methionine Metabolism	AA other (Cys/Met/Lys/Arg/Pro)	-0.740843	PSERT (5.29e-01, 8.83e-01)
pi	hydrogenphosphate	HPO4	Transport, Mitochondrial	Mitochondrial transport	4.60012e-12	MALtm (1.06e+01, 1.06e+01); HUMANGEM_MAR08651 (5.22e-03, 5.22e-03)
glutcoa	glutaryl-CoA(5-)	Glutaryl-CoA	Tryptophan Metabolism	AAA metabolism (Trp/Phe/Tyr)	-6	2OXOADOXm (0.00e+00, 9.19e-03); r0541 (0.00e+00, 9.19e-03)
h	proton	H	Glycine, Serine And Threonine Metabolism	AA central (A/D/E,G/S/T)	-0.128322	r0553m (2.79e+00, 2.84e+00); r0552m (2.79e+00, 2.84e+00); r0552 (1.26e+00, 1.28e+00); r0553 (1.26e+00, 1.28e+00); GCC2am (5.29e-01, 8.83e-01); PGCD (5.29e-01, 8.83e-01)
dag_hs	diglyceride	Diglyceride	Glycerophospholipid Metabolism	Lipid metabolism	-1.66535e-11	CEPTC (1.65e-02, 1.65e-02); DAGK_hs (1.61e-02, 1.61e-02)
glu__L	L-glutamate(1-)	L-Glu	Lysine Degradation	AA other (Cys/Met/Lys/Arg/Pro)	-6	r0525 (0.00e+00, 9.19e-03); r0450 (0.00e+00, 9.19e-03)
6pgc	6-Phospho-D-gluconate	6-Phospho-D-gluconate	Pentose Phosphate Pathway	Redox & Pentose Metabolism	3.71447e-11	PGL (1.19e-02, 1.19e-02); GND (1.19e-02, 1.19e-02)
amp	AMP	AMP	Nucleotide Metabolism	Nucleotide metabolism	1.92561e-11	ADK1 (3.75e-01, 3.75e-01); R_group_phosphotase_1 (1.80e-02, 1.80e-02); ADSL1 (4.61e-03, 4.61e-03); NTD7 (1.20e-03, 1.20e-03)
asp__L	L-aspartate(1-)	L-aspartate(1-)	Biomass And Maintenance Functions	Biomass And Maintenance Functions	2.36426e-11	BIOMASS_maintenance (3.42e-02, 3.42e-02)
pro__L	L-proline	L-Pro	Extracellular Transport	Extracellular Transport	2.36506e-11	PROt4 (2.32e-02, 2.32e-02); r1402 (8.78e-04, 8.78e-04)
gln__L	L-glutamine	L-Gln	Alanine, Aspartate And Glutamate Metabolism	AA central (A/D/E,G/S/T)	-2.01255e-12	GLUNm (4.48e-01, 4.48e-01); GLUPRT (6.71e-03, 6.71e-03)
pram	5-Phospho-beta-D-ribosylamine	5-Phospho-beta-D-ribosylamine	Purine Synthesis	Nucleotide metabolism	9.65135e-11	PRAGSr (6.71e-03, 6.71e-03); GLUPRT (6.71e-03, 6.71e-03)
dgtp	dGTP	dGTP	Biomass And Maintenance Functions	Biomass And Maintenance Functions	2.36426e-11	BIOMASS_maintenance (3.42e-02, 3.42e-02)
25aics	(S)-2-[5-Amino-1-(5-phospho-D-ribosyl)imidazole-4-carboxamido]succinate	(S)-2-[5-Amino-1-(5-phospho-D-ribosyl)imidAzole-4-carboxamido]succinate	Purine Metabolism	Nitrogen disposal	9.65154e-11	PRASCS (6.71e-03, 6.71e-03); ADSL2 (6.71e-03, 6.71e-03)
cys__L	L-cysteine	L-Cys	Biomass And Maintenance Functions	Biomass And Maintenance Functions	2.36426e-11	BIOMASS_maintenance (3.42e-02, 3.42e-02)
hco3	Bicarbonate	HCO3	Fatty Acid Degradation	Lipid metabolism	-2.32668e-11	ACCOACm (1.29e-01, 1.29e-01)
co2	carbon dioxide	CO2	Tryptophan Metabolism	AAA metabolism (Trp/Phe/Tyr)	-6	2OXOADOXm (0.00e+00, 9.19e-03); r0541 (0.00e+00, 9.19e-03)
didp	dIDP	DIDP	Transport, Nuclear	Transport, Nuclear	-1.13494e-10	DIDPtn (1.20e-03, 1.20e-03)
nad	Nicotinamide adenine dinucleotide	NAD(+)	Sphingolipid Metabolism	Lipid metabolism	2.36416e-11	RE2675C (7.31e-04, 7.31e-04)
co2	carbon dioxide	CO2	Biosynthesis Of Amino Acids	Biosynthesis Of Amino Acids	6.01211	ICDHxm (3.32e-01, 0.00e+00); r0034 (5.22e-03, 5.22e-03)
pmtcoa	Palmitoyl-CoA (n-C16:0CoA)	Palmitoyl-CoA (n-C16:0CoA)	Fatty Acid Biosynthesis	Lipid metabolism	-1.84923e-11	FAS160COA (1.84e-02, 1.84e-02); ARTPLM2 (1.73e-02, 1.73e-02); ARTPLM3 (3.70e-04, 3.70e-04)
q10	ubiquinone-10	Ubiquinone-10	Oxidative Phosphorylation	Oxidative Phosphorylation	-0.0201406	CYOR_u10m (7.12e+00, 7.53e+00); NADH2_u10m (6.15e+00, 5.92e+00)
Rtotalcoa	R total Coenzyme A	R total Coenzyme A	Nucleotide Metabolism	Nucleotide metabolism	-1.27753e-11	R_group_phosphotase_1 (1.80e-02, 1.80e-02)
adp	ADP	ATP/ADP	Biomass And Maintenance Functions	Biomass And Maintenance Functions	4.35666e-14	ATPM (1.85e+01, 1.85e+01); BIOMASS_maintenance (3.42e-02, 3.42e-02)
2dr1p	2-Deoxy-D-ribose 1-phosphate	2-Deoxy-D-ribose 1-phosphate	Nucleotide Metabolism	Nucleotide metabolism	-1.47939e-11	PUNP4 (2.44e-02, 2.44e-02); PUNP2 (1.20e-03, 1.20e-03)
akg	2-Oxoglutarate	Î±-KG	Nitrogen Metabolism	Nitrogen disposal	-6	GLUDxm (0.00e+00, 3.30e-01)
fdp	D-Fructose 1,6-bisphosphate	F1,6BP	Pentose Phosphate Pathway	Redox & Pentose Metabolism	-8.05662e-14	FBA (4.98e+00, 4.98e+00)
trp__L	L-tryptophan	L-tryptophan	Tryptophan Metabolism	AAA metabolism (Trp/Phe/Tyr)	9.65141e-11	TRPO2 (1.34e-02, 1.34e-02)
gln__L	L-glutamine	L-Gln	Purine Synthesis	Nucleotide metabolism	9.65132e-11	PRFGS (6.71e-03, 6.71e-03); GLUPRT (6.71e-03, 6.71e-03)
gdp	GDP	GDP	Nucleotide Interconversion	Nucleotide metabolism	7.73371e-12	GK1 (2.65e-02, 2.65e-02); RNDR2 (2.53e-02, 2.53e-02); NDPK1 (5.85e-03, 5.85e-03); ADSS (4.61e-03, 4.61e-03)
trp__L	L-tryptophan	L-tryptophan	Biomass And Maintenance Functions	Biomass And Maintenance Functions	2.36426e-11	BIOMASS_maintenance (3.42e-02, 3.42e-02)
lac__L	(S)-lactate	(S)-lactate	Pyruvate Metabolism	Central Energy Metabolism	0.0506976	LDH__L (9.37e+00, 9.05e+00)
ser__L	L-serine	L-ser	Cyanoamino Acid Metabolism	Cyanoamino Acid Metabolism	-0.740843	GHMT2rm (5.29e-01, 8.83e-01)
gua	Guanine	Guanine	Purine Catabolism	Purine Catabolism	-9.27664e-12	PUNP4 (2.44e-02, 2.44e-02); PUNP3 (5.02e-04, 5.02e-04)
nadp	Nicotinamide adenine dinucleotide phosphate	NADP(+)	Sphingolipid Metabolism	Lipid metabolism	2.36422e-11	3DSPHR (7.31e-04, 7.31e-04)
malcoa	Malonyl-CoA	Malonyl-CoA	Fatty Acid Degradation	Lipid metabolism	-2.32668e-11	ACCOACm (1.29e-01, 1.29e-01)
h2o	Water	H2O	Nucleotide Metabolism	Nucleotide metabolism	-3.12334e-14	ATPM (1.85e+01, 1.85e+01); NTD8 (2.44e-02, 2.44e-02); CTPS2 (1.84e-02, 1.84e-02); NTD2 (7.85e-03, 7.85e-03); NTD7 (1.20e-03, 1.20e-03)
gmp	GMP	GMP	Purine Metabolism	Nitrogen disposal	-0.0359321	r0276 (9.71e-01, 9.96e-01); GMPR (9.69e-01, 9.94e-01); GK1 (2.65e-02, 2.65e-02); GUAPRT (2.49e-02, 2.49e-02)
ser__L	L-serine	L-ser	Sphingolipid Metabolism	Lipid metabolism	2.36422e-11	SERPT (7.31e-04, 7.31e-04)
lys__L	L-lysinium(1+)	Lys	Transport, Endosomal	Transport, Endosomal	0.38387	LYSt5r (4.60e-02, 3.53e-02)
glu__L	L-glutamate(1-)	L-Glu	Biomass And Maintenance Functions	Biomass And Maintenance Functions	2.36426e-11	BIOMASS_maintenance (3.42e-02, 3.42e-02)
h	proton	H	Purine Catabolism	Purine Catabolism	-0.0368328	r0276 (9.71e-01, 9.96e-01)
h2o	Water	H2O	Glycolysis/Gluconeogenesis	Central Energy Metabolism	0.0554195	ENO (9.41e+00, 9.06e+00)
hco3	Bicarbonate	HCO3	Propanoate Metabolism	Propanoate Metabolism	-2.46589e-11	ACCOACm (1.29e-01, 1.29e-01); PPCOACm (4.73e-02, 4.73e-02)
val__L	L-valine	L-Val	Pseudoreactions	Pseudoreactions	0	EX_val__L_e (5.00e-02, 5.00e-02)
nadh	Nicotinamide adenine dinucleotide - reduced	NAD(+)	Methane Metabolism	Methane Metabolism	-0.983058	PGCD (5.29e-01, 8.83e-01); MDH (1.68e-01, 4.94e-01)
coa	Coenzyme A	CoA	Synthesis And Degradation Of Ketone Bodies	Lipid metabolism	-2.3267e-11	HMGCOASim (9.19e-03, 9.19e-03)
hco3	Bicarbonate	HCO3	Pyruvate Metabolism	Central Energy Metabolism	1.03033	PCm (3.32e-01, 9.67e-02); ACCOACm (1.29e-01, 1.29e-01)
pser__L	O-Phospho-L-serine	O-Phospho-L-serine	Methane Metabolism	Methane Metabolism	-0.740843	PSERT (5.29e-01, 8.83e-01)
ppi	Diphosphate	PPi	Transport, Mitochondrial	Mitochondrial transport	1.63596e-11	PPItm (3.91e-01, 3.91e-01); HUMANGEM_MAR08651 (5.22e-03, 5.22e-03)
adn	Adenosine	Ado	Nucleotide Interconversion	Nucleotide metabolism	9.21174e-11	PUNP1 (1.20e-03, 1.20e-03); NTD7 (1.20e-03, 1.20e-03)
h	proton	H	Fatty Acid Degradation	Lipid metabolism	-0.0995357	ACCOACm (1.29e-01, 1.29e-01); HACD1m (0.00e+00, 9.19e-03)
gsn	Guanosine	Guanosine	Nucleotide Metabolism	Nucleotide metabolism	3.50047e-10	PUNP3 (5.02e-04, 5.02e-04)
co2	carbon dioxide	CO2	Transport, Mitochondrial	Mitochondrial transport	0.128934	CO2tm (3.56e+00, 3.26e+00)
h	proton	H	Transport, Endosomal	Transport, Endosomal	0.0506976	L__LACt2r (9.37e+00, 9.05e+00)
atp	ATP	ATP/ADP	Fatty Acid Degradation	Lipid metabolism	-2.32668e-11	ACCOACm (1.29e-01, 1.29e-01)
pglyc_hs	phosphatidylglycerol(1-)	Phosphatidylglycerol(1-)	Biomass And Maintenance Functions	Biomass And Maintenance Functions	2.36426e-11	BIOMASS_maintenance (3.42e-02, 3.42e-02)
h2o	Water	H2O	Pyrimidine Synthesis	Nucleotide metabolism	-1.7984e-11	CTPS2 (1.84e-02, 1.84e-02); DHORTS (5.22e-03, 5.22e-03)
accoa	Acetyl-CoA	Acetyl-CoA	Glycolysis/Gluconeogenesis	Central Energy Metabolism	6	PDHm (4.47e-01, 0.00e+00)
nh4	Ammonium	NH4	Nucleotide Interconversion	Nucleotide metabolism	-0.0369114	GMPR (9.69e-01, 9.94e-01)
Rtotal3coa	R total 3 Coenzyme A	R total 3 Coenzyme A	Triacylglycerol Synthesis	Lipid metabolism	2.36583e-11	DGAT (3.70e-04, 3.70e-04)
adp	ADP	ATP/ADP	Transport, Mitochondrial	Mitochondrial transport	-0.0422198	ATPtm (1.19e+01, 1.23e+01)
nadph	Nicotinamide adenine dinucleotide phosphate - reduced	NADP(+)	Lysine Degradation	AA other (Cys/Met/Lys/Arg/Pro)	-6	SACCD3m (0.00e+00, 9.19e-03)
cholp	choline phosphate(1-)	Choline phosphate(1-)	Glycerophospholipid Metabolism	Lipid metabolism	-1.62121e-11	CHOLK (1.65e-02, 1.65e-02); CHLPCTD (1.65e-02, 1.65e-02)
gua	Guanine	Guanine	Nucleotide Salvage Pathway	Nucleotide Salvage Pathway	-9.27664e-12	GUAPRT (2.49e-02, 2.49e-02)
malcoa	Malonyl-CoA	Malonyl-CoA	Propanoate Metabolism	Propanoate Metabolism	-2.32668e-11	ACCOACm (1.29e-01, 1.29e-01)
cdpdag_hs	CDP-diacylglycerol(2-)	CDP-diacylglycerol(2-)	Glycerophospholipid Metabolism	Lipid metabolism	2.36563e-11	CDS (1.12e-03, 1.12e-03); CDIPTr (6.22e-04, 6.22e-04); PGPPTm (2.77e-04, 2.77e-04); CLSm_hs (2.26e-04, 2.26e-04)
nh4	Ammonium	NH4	Nitrogen Metabolism	Nitrogen disposal	-6.00417	GLUDxm (0.00e+00, 3.30e-01); r0034 (5.22e-03, 5.22e-03)
hco3	Bicarbonate	HCO3	Fatty Acid Biosynthesis	Lipid metabolism	-2.32668e-11	ACCOACm (1.29e-01, 1.29e-01)
accoa	Acetyl-CoA	Acetyl-CoA	Valine, Leucine And Isoleucine Degradation	BCAA metabolism (Val/Leu/Iso)	0.206983	ACACT10m (3.20e-02, 3.20e-02); HMGCOASim (9.19e-03, 9.19e-03); HMGLm (9.19e-03, 9.19e-03); ACACT1r (9.19e-03, 9.19e-03); ACACT1rm (9.19e-03, 0.00e+00)
pmtcoa	Palmitoyl-CoA (n-C16:0CoA)	Palmitoyl-CoA (n-C16:0CoA)	Sphingolipid Metabolism	Lipid metabolism	2.36422e-11	SERPT (7.31e-04, 7.31e-04)
gln__L	L-glutamine	L-Gln	Biomass And Maintenance Functions	Biomass And Maintenance Functions	2.36426e-11	BIOMASS_maintenance (3.42e-02, 3.42e-02)
air	5-amino-1-(5-phospho-D-ribosyl)imidazole	5-Amino-1-(5-phospho-D-ribosyl)imidAzole	Purine Synthesis	Nucleotide metabolism	9.65148e-11	r0666 (6.71e-03, 6.71e-03); AIRCr (6.71e-03, 6.71e-03)
co2	carbon dioxide	CO2	Valine, Leucine And Isoleucine Biosynthesis	BCAA metabolism (Val/Leu/Iso)	-3.46175e-11	r0670 (3.20e-02, 3.20e-02); r0385 (1.53e-02, 1.53e-02); MMSAD1m (1.53e-02, 1.53e-02)
coa	Coenzyme A	CoA	Biosynthesis Of Amino Acids	Biosynthesis Of Amino Acids	6	CSm (3.32e-01, 0.00e+00)
pi	hydrogenphosphate	HPO4	Purine Metabolism	Nitrogen disposal	1.15323e-13	ATPM (1.85e+01, 1.85e+01); PUNP4 (2.44e-02, 2.44e-02); NTD8 (2.44e-02, 2.44e-02); PRFGS (6.71e-03, 6.71e-03); PRAGSr (6.71e-03, 6.71e-03); PRASCS (6.71e-03, 6.71e-03); ADSS (4.61e-03, 4.61e-03); PUNP2 (1.20e-03, 1.20e-03); PUNP1 (1.20e-03, 1.20e-03); NTD7 (1.20e-03, 1.20e-03); PUNP3 (5.02e-04, 5.02e-04)
C02470	Xanthurenic acid	Xanthurenic acid	Tryptophan Metabolism	AAA metabolism (Trp/Phe/Tyr)	9.65138e-11	r0647 (1.34e-02, 1.34e-02)
fgam	N2-Formyl-N1-(5-phospho-D-ribosyl)glycinamide	N2-Formyl-N1-(5-phospho-D-ribosyl)glycinamide	Purine Metabolism	Nitrogen disposal	9.65128e-11	GARFT (6.71e-03, 6.71e-03); PRFGS (6.71e-03, 6.71e-03)
q10h2	Ubiquinol-10	Ubiquinol-10	Citric Acid Cycle	Central Energy Metabolism	0.700208	r0509 (9.26e-01, 5.70e-01)
co2	carbon dioxide	CO2	Glutathione Metabolism	Redox & Pentose Metabolism	3.71447e-11	GND (1.19e-02, 1.19e-02)
fum	Fumarate	Fumarate	Citric Acid Cycle	Central Energy Metabolism	0.694739	FUMm (9.26e-01, 5.70e-01); r0509 (9.26e-01, 5.70e-01); FUM (1.13e-02, 1.13e-02)
lpam	lipoamide	Lipoamide	Glycine, Serine And Threonine Metabolism	AA central (A/D/E,G/S/T)	-0.740843	GCC2am (5.29e-01, 8.83e-01)
glu__L	L-glutamate(1-)	L-Glu	Transport, Mitochondrial	Mitochondrial transport	0.048515	GLUt2m (1.06e+01, 1.02e+01)
h	proton	H	Propanoate Metabolism	Propanoate Metabolism	-2.46589e-11	ACCOACm (1.29e-01, 1.29e-01); PPCOACm (4.73e-02, 4.73e-02)
h2o	Water	H2O	Glycerophospholipid Metabolism	Lipid metabolism	-1.22248e-11	GPDDA1 (9.00e-03, 9.00e-03); LPASE (9.00e-03, 9.00e-03); PGPP_hs (2.77e-04, 2.77e-04)
oaa	Oxaloacetate	Oxaloacetate	Pseudoreactions	Pseudoreactions	-1.89033	EX_oaa_e (1.20e-01, 4.46e-01)
3hbcoa	(S)-3-hydroxybutanoyl-CoA(4-)	SC acyl-CoA	Fatty Acid Degradation	Lipid metabolism	-6	HACD1m (0.00e+00, 9.19e-03); ECOAH1m (0.00e+00, 9.19e-03)
atp	ATP	ATP/ADP	Propanoate Metabolism	Propanoate Metabolism	0.562984	SUCOASm (9.26e-01, 5.70e-01); ACCOACm (1.29e-01, 1.29e-01); PPCOACm (4.73e-02, 4.73e-02)
nadh	Nicotinamide adenine dinucleotide - reduced	NAD(+)	Beta-alanine Metabolism	Beta-alanine Metabolism	-6	MMSAD3m (0.00e+00, 9.67e-02)
3mob	3-methyl-2-oxobutanoate	Î±-Ketoisovalerate	Biosynthesis Of Amino Acids	Biosynthesis Of Amino Acids	-5.37022e-11	VALTA (1.53e-02, 1.53e-02)
h	proton	H	Pyruvate Metabolism	Central Energy Metabolism	0.0443502	PYK (9.41e+00, 9.06e+00); LDH__L (9.37e+00, 9.05e+00); MDH (1.68e-01, 4.94e-01); PCm (3.32e-01, 9.67e-02); ACCOACm (1.29e-01, 1.29e-01)
cytd	Cytidine	Cytidine	Pyrimidine Metabolism	Nucleotide metabolism	-1.99883e-11	CYTDK1 (7.52e-03, 7.52e-03)
3pg	3-Phospho-D-glycerate	3-PG	Cysteine And Methionine Metabolism	AA other (Cys/Met/Lys/Arg/Pro)	-0.740843	PGCD (5.29e-01, 8.83e-01)
3hibutcoa	(S)-3-Hydroxyisobutyryl-CoA	(S)-3-Hydroxyisobutyryl-CoA	Valine, Leucine And Isoleucine Degradation	BCAA metabolism (Val/Leu/Iso)	-5.37022e-11	3HBCOAHLm (1.53e-02, 1.53e-02); ECOAH12m (1.53e-02, 1.53e-02)
atp	ATP	ATP/ADP	Pyruvate Metabolism	Central Energy Metabolism	0.0888298	PYK (9.41e+00, 9.06e+00); PCm (3.32e-01, 9.67e-02); ACCOACm (1.29e-01, 1.29e-01)
nadp	Nicotinamide adenine dinucleotide phosphate	NADP(+)	Nucleotide Interconversion	Nucleotide metabolism	-0.0367573	GMPR (9.69e-01, 9.94e-01); TRDR (4.12e-03, 4.12e-03)
fgam	N2-Formyl-N1-(5-phospho-D-ribosyl)glycinamide	N2-Formyl-N1-(5-phospho-D-ribosyl)glycinamide	Folate Metabolism	Folate Metabolism	9.65128e-11	GARFT (6.71e-03, 6.71e-03)
pglyc_hs	phosphatidylglycerol(1-)	Phosphatidylglycerol(1-)	Transport, Mitochondrial	Mitochondrial transport	2.36563e-11	HUMANGEM_MAR11371 (2.26e-04, 2.26e-04)
pail_hs	1-phosphatidyl-1D-myo-inositol(1-)	1-Phosphatidyl-1D-myo-inositol(1-)	Biomass And Maintenance Functions	Biomass And Maintenance Functions	2.36426e-11	BIOMASS_maintenance (3.42e-02, 3.42e-02)
glu__L	L-glutamate(1-)	L-Glu	Glutathione Metabolism	Redox & Pentose Metabolism	1.21128	r0129 (3.31e-02, 1.85e-02); r0130 (9.76e-03, 0.00e+00)
gmp	GMP	GMP	Nucleotide Metabolism	Nucleotide metabolism	-0.0359321	r0276 (9.71e-01, 9.96e-01); GMPR (9.69e-01, 9.94e-01); GK1 (2.65e-02, 2.65e-02); GUAPRT (2.49e-02, 2.49e-02)
gdp	GDP	GDP	Nucleotide Metabolism	Nucleotide metabolism	2.3476e-11	GK1 (2.65e-02, 2.65e-02); NDPK1 (5.85e-03, 5.85e-03); ADSS (4.61e-03, 4.61e-03)
cbasp	N-Carbamoyl-L-aspartate	N-Carbamoyl-L-aspartate	Pyrimidine Metabolism	Nucleotide metabolism	-3.91896e-11	ASPCTr (5.22e-03, 5.22e-03)
h	proton	H	Fatty Acid Biosynthesis	Lipid metabolism	-2.32666e-11	ACCOACm (1.29e-01, 1.29e-01); FAS140COA (1.84e-02, 1.84e-02); FAS100COA (1.84e-02, 1.84e-02); FAS120COA (1.84e-02, 1.84e-02); FAS80COA__L (1.84e-02, 1.84e-02); FAS160COA (1.84e-02, 1.84e-02)
alpa_hs	lysophosphatidic acid	Lysophosphatidic acid	Triacylglycerol Synthesis	Lipid metabolism	-1.43163e-11	GPAM_hs (1.73e-02, 1.73e-02); AGPAT1 (1.73e-02, 1.73e-02)
gln__L	L-glutamine	L-Gln	Transport, Mitochondrial	Mitochondrial transport	-3.48757e-12	GLNtm (4.48e-01, 4.48e-01)
aacoa	Acetoacetyl-CoA	Acetoacetyl-CoA	Terpenoid Backbone Biosynthesis	Terpenoid Backbone Biosynthesis	0.584963	HMGCOASim (9.19e-03, 9.19e-03); ACACT1r (9.19e-03, 9.19e-03); ACACT1rm (9.19e-03, 0.00e+00)
coa	Coenzyme A	CoA	Transport, Mitochondrial	Mitochondrial transport	-2.45413e-11	COAtim (1.29e-01, 1.29e-01)
fprica	5-Formamido-1-(5-phospho-D-ribosyl)imidazole-4-carboxamide	5-Formamido-1-(5-phospho-D-ribosyl)imidAzole-4-carboxamide	Purine Metabolism	Nitrogen disposal	9.65148e-11	AICART (6.71e-03, 6.71e-03); IMPC (6.71e-03, 6.71e-03)
atp	ATP	ATP/ADP	Fatty Acid Biosynthesis	Lipid metabolism	-2.32668e-11	ACCOACm (1.29e-01, 1.29e-01)
tag_hs	triglyceride	Triglyceride	Biomass And Maintenance Functions	Biomass And Maintenance Functions	2.36426e-11	BIOMASS_maintenance (3.42e-02, 3.42e-02)
asp__L	L-aspartate(1-)	L-aspartate(1-)	Nucleotide Interconversion	Nucleotide metabolism	1.29607e-10	ADSS (4.61e-03, 4.61e-03)
mmcoa_S	(S)-methylmalonyl-CoA(5-)	(S)-methylmalonyl-CoA(5-)	Glyoxylate And Dicarboxylate Metabolism	Glyoxylate And Dicarboxylate Metabolism	-3.01846e-11	PPCOACm (4.73e-02, 4.73e-02); MMEm (4.73e-02, 4.73e-02)
h	proton	H	Beta-alanine Metabolism	Beta-alanine Metabolism	-6	ASP1DCm (0.00e+00, 9.67e-02)
asp__L	L-aspartate(1-)	L-aspartate(1-)	Purine Metabolism	Nitrogen disposal	1.09998e-10	PRASCS (6.71e-03, 6.71e-03); ADSS (4.61e-03, 4.61e-03)
adn	Adenosine	Ado	Nucleotide Metabolism	Nucleotide metabolism	9.21174e-11	PUNP1 (1.20e-03, 1.20e-03); NTD7 (1.20e-03, 1.20e-03)
nadp	Nicotinamide adenine dinucleotide phosphate	NADP(+)	Pentose Phosphate Pathway	Redox & Pentose Metabolism	3.71447e-11	G6PDH2r (1.19e-02, 1.19e-02); GND (1.19e-02, 1.19e-02)
co2	carbon dioxide	CO2	Inositol Phosphate Metabolism	Inositol Phosphate Metabolism	-6	MMSAD3m (0.00e+00, 9.67e-02)
nadp	Nicotinamide adenine dinucleotide phosphate	NADP(+)	Folate Metabolism	Folate Metabolism	-0.398843	FTHFDHm (1.06e+00, 1.77e+00); r0553 (1.26e+00, 1.28e+00); r0226 (1.20e-03, 1.20e-03)
dgtp	dGTP	dGTP	Purine Metabolism	Nitrogen disposal	2.36435e-11	NDPK5 (8.62e-04, 8.62e-04)
ser__L	L-serine	L-ser	Folate Metabolism	Folate Metabolism	-0.740843	GHMT2rm (5.29e-01, 8.83e-01)
ppi	Diphosphate	PPi	Purine Metabolism	Nitrogen disposal	1.31744e-11	GUAPRT (2.49e-02, 2.49e-02); GLUPRT (6.71e-03, 6.71e-03)
cmp	CMP	CMP	Pyrimidine Metabolism	Nucleotide metabolism	-1.00178e-11	CYTDK1 (7.52e-03, 7.52e-03); CYTK1 (1.72e-03, 1.72e-03); CYTK1m (5.02e-04, 5.02e-04)
cit	Citrate	Citrate	Citric Acid Cycle	Central Energy Metabolism	6	CSm (3.32e-01, 0.00e+00); ACONTm (3.32e-01, 0.00e+00)
chsterol	cholesterol	Cholesterol	Pseudoreactions	Pseudoreactions	2.36583e-11	EX_chsterol_e (6.97e-04, 6.97e-04)
Rtotal	R total	R total	Nucleotide Metabolism	Nucleotide metabolism	-1.27753e-11	R_group_phosphotase_1 (1.80e-02, 1.80e-02)
co2	carbon dioxide	CO2	Purine Metabolism	Nitrogen disposal	9.65157e-11	AIRCr (6.71e-03, 6.71e-03)
pi	hydrogenphosphate	HPO4	Nucleotide Metabolism	Nucleotide metabolism	-3.17139e-14	ATPM (1.85e+01, 1.85e+01); PUNP4 (2.44e-02, 2.44e-02); NTD8 (2.44e-02, 2.44e-02); PYNP2r (2.32e-02, 2.32e-02); CTPS2 (1.84e-02, 1.84e-02); NTD2 (7.85e-03, 7.85e-03); ADSS (4.61e-03, 4.61e-03); PUNP2 (1.20e-03, 1.20e-03); PUNP1 (1.20e-03, 1.20e-03); NTD7 (1.20e-03, 1.20e-03); PUNP3 (5.02e-04, 5.02e-04)
5aizc	5-amino-1-(5-phospho-D-ribosyl)imidazole-4-carboxylate	5-Amino-1-(5-phospho-D-ribosyl)imidAzole-4-carboxylate	Purine Metabolism	Nitrogen disposal	9.65154e-11	AIRCr (6.71e-03, 6.71e-03); PRASCS (6.71e-03, 6.71e-03)
adp	ADP	ATP/ADP	Purine Metabolism	Nitrogen disposal	4.83077e-13	ATPM (1.85e+01, 1.85e+01); ADK1 (3.75e-01, 3.75e-01); GK1 (2.65e-02, 2.65e-02); PRFGS (6.71e-03, 6.71e-03); PRAGSr (6.71e-03, 6.71e-03); PRASCS (6.71e-03, 6.71e-03); NDPK1 (5.85e-03, 5.85e-03); NDPK8 (2.39e-03, 2.39e-03); NDPK10 (1.20e-03, 1.20e-03); NDPK10n (1.20e-03, 1.20e-03); NDPK8m (1.20e-03, 1.20e-03); NDPK5 (8.62e-04, 8.62e-04)
13dpg	3-Phospho-D-glyceroyl phosphate	3-Phospho-D-glyceroyl phosphate	Biosynthesis Of Amino Acids	Biosynthesis Of Amino Acids	-6.80728e-14	PGK (9.94e+00, 9.94e+00)
3mob	3-methyl-2-oxobutanoate	Î±-Ketoisovalerate	Valine, Leucine And Isoleucine Biosynthesis	BCAA metabolism (Val/Leu/Iso)	-5.37024e-11	r0385 (1.53e-02, 1.53e-02); VALTA (1.53e-02, 1.53e-02)
dad_2	Deoxyadenosine	dA	Nucleotide Interconversion	Nucleotide metabolism	2.36422e-11	DADNK (1.20e-03, 1.20e-03)
gthrd	Reduced glutathione	Reduced glutathione	Transport, Endoplasmic Reticulum	Transport, Endoplasmic Reticulum	0.838556	HUMANGEM_MAR06107 (3.31e-02, 1.85e-02)
alpam	S-aminomethyldihydrolipoamide	S-aminomethyldihydrolipoamide	Alanine, Aspartate And Glutamate Metabolism	AA central (A/D/E,G/S/T)	-0.740843	GCC2am (5.29e-01, 8.83e-01); GCC2bim (5.29e-01, 8.83e-01)
dad_2	Deoxyadenosine	dA	Purine Metabolism	Nitrogen disposal	2.35465e-11	PUNP2 (1.20e-03, 1.20e-03)
3pg	3-Phospho-D-glycerate	3-PG	Methane Metabolism	Methane Metabolism	-6.80728e-14	PGM (9.41e+00, 9.06e+00); PGCD (5.29e-01, 8.83e-01)
cbp	Carbamoyl phosphate	Carbamoyl phosphate	Pyrimidine Metabolism	Nucleotide metabolism	-3.91896e-11	ASPCTr (5.22e-03, 5.22e-03)
mlthf	5,10-Methylenetetrahydrofolate	CH2-THF	Alanine, Aspartate And Glutamate Metabolism	AA central (A/D/E,G/S/T)	-0.740843	GCC2bim (5.29e-01, 8.83e-01); GHMT2rm (5.29e-01, 8.83e-01)
nad	Nicotinamide adenine dinucleotide	NAD(+)	Glycolysis/Gluconeogenesis	Central Energy Metabolism	0.0121247	GAPD (9.94e+00, 9.94e+00); GCC2cm (5.76e-01, 9.31e-01); PDHm (4.47e-01, 0.00e+00)
dctp	dCTP	dCTP	Nucleotide Interconversion	Nucleotide metabolism	2.36422e-11	CYTK12 (8.62e-04, 8.62e-04)
dttp	dTTP	dTTP	Pyrimidine Metabolism	Nucleotide metabolism	2.36426e-11	NDPK4n (1.20e-03, 1.20e-03)
h2o	Water	H2O	Glycine, Serine And Threonine Metabolism	AA central (A/D/E,G/S/T)	-0.128322	r0553m (2.79e+00, 2.84e+00); r0552m (2.79e+00, 2.84e+00); r0552 (1.26e+00, 1.28e+00); r0553 (1.26e+00, 1.28e+00); PSP__Lm (5.29e-01, 8.83e-01); GHMT2rm (5.29e-01, 8.83e-01)
pi	hydrogenphosphate	HPO4	Pyrimidine Synthesis	Nucleotide metabolism	-1.7984e-11	CTPS2 (1.84e-02, 1.84e-02); ASPCTr (5.22e-03, 5.22e-03)
glu__L	L-glutamate(1-)	L-Glu	Purine Metabolism	Nitrogen disposal	9.65132e-11	PRFGS (6.71e-03, 6.71e-03); GLUPRT (6.71e-03, 6.71e-03)
gly	Glycine	Glycine	Extracellular Transport	Extracellular Transport	-5.09879	GLYt4 (0.00e+00, 1.46e-02); r1402 (8.78e-04, 8.78e-04)
nadph	Nicotinamide adenine dinucleotide phosphate - reduced	NADP(+)	Glutathione Metabolism	Redox & Pentose Metabolism	3.71447e-11	GND (1.19e-02, 1.19e-02)
h2o2	Hydrogen peroxide	Hydrogen peroxide	Extracellular Transport	Extracellular Transport	-0.0804183	H2O2t (7.12e-02, 7.53e-02)
ditp	dITP(4-)	DITP	Transport, Nuclear	Transport, Nuclear	-1.13495e-10	DITPtn (1.20e-03, 1.20e-03)
10fthf	10-Formyltetrahydrofolate	10-Formyltetrahydrofolate	Folate Metabolism	Folate Metabolism	-0.734206	MTHFCm (1.06e+00, 1.77e+00); FTHFDHm (1.06e+00, 1.77e+00); FTHFL (1.34e-02, 1.34e-02); GARFT (6.71e-03, 6.71e-03); AICART (6.71e-03, 6.71e-03)
cit	Citrate	Citrate	Glyoxylate And Dicarboxylate Metabolism	Glyoxylate And Dicarboxylate Metabolism	6	CSm (3.32e-01, 0.00e+00)
cit	Citrate	Citrate	2-oxocarboxylic Acid Metabolism	2-oxocarboxylic Acid Metabolism	6	CSm (3.32e-01, 0.00e+00); ACONTm (3.32e-01, 0.00e+00)
tyr__L	L-tyrosine	L-tyrosine	Extracellular Transport	Extracellular Transport	2.36531e-11	TYRPHELAT2tc (1.59e-02, 1.59e-02); r1402 (8.78e-04, 8.78e-04)
r1p	alpha-D-Ribose 1-phosphate	Alpha-D-Ribose 1-phosphate	Pyrimidine Catabolism	Nucleotide metabolism	-1.87457e-11	PYNP2r (2.32e-02, 2.32e-02)
cl	Chloride	Chloride	Extracellular Transport	Extracellular Transport	-6	ARGATB0tc (0.00e+00, 1.99e-02); KCCt (0.00e+00, 1.99e-02); NKCCt (0.00e+00, 1.99e-02)
chol	Choline	Choline	Extracellular Transport	Extracellular Transport	2.36637e-11	CHOLtu (5.18e-03, 5.18e-03)
orot5p	Orotidine 5-phosphate	Orotidine 5-phosphate	Pyrimidine Synthesis	Nucleotide metabolism	-3.91898e-11	OMPDC (5.22e-03, 5.22e-03); ORPT (5.22e-03, 5.22e-03)
coa	Coenzyme A	CoA	Inositol Phosphate Metabolism	Inositol Phosphate Metabolism	-6	MMSAD3m (0.00e+00, 9.67e-02)
gtp	GTP	GTP	Alanine, Aspartate And Glutamate Metabolism	AA central (A/D/E,G/S/T)	1.29607e-10	ADSS (4.61e-03, 4.61e-03)
his__L	L-histidine	L-histidine	Pseudoreactions	Pseudoreactions	2.36515e-11	EX_his__L_e (1.22e-02, 1.22e-02)
hco3	Bicarbonate	HCO3	Nitrogen Metabolism	Nitrogen disposal	-0.0584016	r1418c (2.37e+00, 2.73e+00); r1418m (5.07e-01, 2.73e-01); r1418 (3.41e-02, 2.44e-02)
pi	hydrogenphosphate	HPO4	Glycerophospholipid Metabolism	Lipid metabolism	2.36573e-11	PGPP_hs (2.77e-04, 2.77e-04)
gln__L	L-glutamine	L-Gln	Purine Metabolism	Nitrogen disposal	9.65132e-11	PRFGS (6.71e-03, 6.71e-03); GLUPRT (6.71e-03, 6.71e-03)
ctp	CTP	CTP	Biomass And Maintenance Functions	Biomass And Maintenance Functions	2.36426e-11	BIOMASS_maintenance (3.42e-02, 3.42e-02)
glygn2	glycogen, structure 2 (glycogenin-1,6-{7[1,4-Glc], 4[1,4-Glc]})	Glycogen, structure 2 (glycogenin-1,6-{7[1,4-Glc], 4[1,4-Glc]})	Biomass And Maintenance Functions	Biomass And Maintenance Functions	2.36426e-11	BIOMASS_maintenance (3.42e-02, 3.42e-02)
asp__L	L-aspartate(1-)	L-aspartate(1-)	Nucleotide Metabolism	Nucleotide metabolism	1.29607e-10	ADSS (4.61e-03, 4.61e-03)
gly	Glycine	Glycine	Alanine, Aspartate And Glutamate Metabolism	AA central (A/D/E,G/S/T)	-0.740843	GCC2am (5.29e-01, 8.83e-01); GHMT2rm (5.29e-01, 8.83e-01)
nadh	Nicotinamide adenine dinucleotide - reduced	NAD(+)	Nitrogen Metabolism	Nitrogen disposal	-6	GLUDxm (0.00e+00, 3.30e-01)
mal__L	(S)-malate(2-)	(S)-malate(2-)	Citric Acid Cycle	Central Energy Metabolism	0.0401762	FUMm (9.26e-01, 5.70e-01); MDH (1.68e-01, 4.94e-01); FUM (1.13e-02, 1.13e-02)
dgtp	dGTP	dGTP	Nucleotide Metabolism	Nucleotide metabolism	2.36435e-11	NDPK5 (8.62e-04, 8.62e-04)
uri	Uridine	Uridine	Extracellular Transport	Extracellular Transport	-1.9069e-11	URIt (1.54e-02, 1.54e-02)
2dr1p	2-Deoxy-D-ribose 1-phosphate	2-Deoxy-D-ribose 1-phosphate	Purine Catabolism	Purine Catabolism	-1.47939e-11	PUNP4 (2.44e-02, 2.44e-02); PUNP2 (1.20e-03, 1.20e-03)
ppi	Diphosphate	PPi	Nucleotide Metabolism	Nucleotide metabolism	-1.07449e-11	GUAPRT (2.49e-02, 2.49e-02); R_group_phosphotase_1 (1.80e-02, 1.80e-02)
nad	Nicotinamide adenine dinucleotide	NAD(+)	Glycerophospholipid Metabolism	Lipid metabolism	-6.84873	r0202c (8.55e-03, 9.85e-01)
glu__L	L-glutamate(1-)	L-Glu	Pantothenate And Coa Biosynthesis	Pantothenate And Coa Biosynthesis	-5.37022e-11	VALTA (1.53e-02, 1.53e-02)
dttp	dTTP	dTTP	Transport, Nuclear	Transport, Nuclear	2.36422e-11	DTTPtn (1.20e-03, 1.20e-03)
pi	hydrogenphosphate	HPO4	Glyoxylate And Dicarboxylate Metabolism	Glyoxylate And Dicarboxylate Metabolism	-2.84467e-11	PPCOACm (4.73e-02, 4.73e-02)
2pg	D-Glycerate 2-phosphate	D-Glycerate 2-phosphate	Glycolysis/Gluconeogenesis	Central Energy Metabolism	0.0554195	ENO (9.41e+00, 9.06e+00); PGM (9.41e+00, 9.06e+00)
ile__L	L-isoleucine	L-isoleucine	Pseudoreactions	Pseudoreactions	-1.96835e-12	EX_ile__L_e (5.00e-02, 5.00e-02)
adp	ADP	ATP/ADP	Nucleotide Metabolism	Nucleotide metabolism	3.47572e-13	ATPM (1.85e+01, 1.85e+01); ADK1 (3.75e-01, 3.75e-01); GK1 (2.65e-02, 2.65e-02); URIDK2 (2.41e-02, 2.41e-02); CTPS2 (1.84e-02, 1.84e-02); CYTDK1 (7.52e-03, 7.52e-03); NDPK1 (5.85e-03, 5.85e-03); NDPK8 (2.39e-03, 2.39e-03); NDPK3m (2.13e-03, 2.13e-03); CYTK1 (1.72e-03, 1.72e-03); NDPK10 (1.20e-03, 1.20e-03); NDPK10n (1.20e-03, 1.20e-03); NDPK6m (1.20e-03, 1.20e-03); NDPK8m (1.20e-03, 1.20e-03); NDP…
icit	Isocitrate	Isocitrate	Citric Acid Cycle	Central Energy Metabolism	6	ACONTm (3.32e-01, 0.00e+00); ICDHxm (3.32e-01, 0.00e+00)
q10	ubiquinone-10	Ubiquinone-10	Tryptophan Metabolism	AAA metabolism (Trp/Phe/Tyr)	-6	r0541 (0.00e+00, 9.19e-03)
glygn1	glycogen, structure 1 (glycogenin-11[1,4-Glc])	Glycogen, structure 1 (glycogenin-11[1,4-Glc])	Starch And Sucrose Metabolism	Starch And Sucrose Metabolism	2.36499e-11	GLBRAN (8.78e-04, 8.78e-04); GLGNS1 (8.78e-04, 8.78e-04)
g6p	D-Glucose 6-phosphate	D-Glucose 6-phosphate	Pentose Phosphate Pathway	Redox & Pentose Metabolism	3.71447e-11	G6PDH2r (1.19e-02, 1.19e-02)
oaa	Oxaloacetate	Oxaloacetate	Pyruvate Metabolism	Central Energy Metabolism	-0.240646	MDH (1.68e-01, 4.94e-01); PCm (3.32e-01, 9.67e-02)
gly	Glycine	Glycine	Purine Synthesis	Nucleotide metabolism	9.65132e-11	PRAGSr (6.71e-03, 6.71e-03)
asp__L	L-aspartate(1-)	L-aspartate(1-)	Pyrimidine Synthesis	Nucleotide metabolism	-3.91896e-11	ASPCTr (5.22e-03, 5.22e-03)
nadph	Nicotinamide adenine dinucleotide phosphate - reduced	NADP(+)	Nucleotide Interconversion	Nucleotide metabolism	-0.0367573	GMPR (9.69e-01, 9.94e-01); TRDR (4.12e-03, 4.12e-03)
mlthf	5,10-Methylenetetrahydrofolate	CH2-THF	Biosynthesis Of Amino Acids	Biosynthesis Of Amino Acids	-0.740843	GHMT2rm (5.29e-01, 8.83e-01)
ser__L	L-serine	L-ser	Glycerophospholipid Metabolism	Lipid metabolism	-1.2071e-10	PSSA1_hs (2.27e-03, 2.27e-03)
ppi	Diphosphate	PPi	Pyrimidine Synthesis	Nucleotide metabolism	-3.91896e-11	ORPT (5.22e-03, 5.22e-03)
dad_2	Deoxyadenosine	dA	Nucleotide Metabolism	Nucleotide metabolism	2.35465e-11	PUNP2 (1.20e-03, 1.20e-03)
h2o	Water	H2O	Fatty Acid Degradation	Lipid metabolism	-6	ECOAH1m (0.00e+00, 9.19e-03)
42A3HP24DB	4-(2-Amino-3-hydroxyphenyl)-2,4-dioxobutanoate	4-(2-Amino-3-hydroxyphenyl)-2,4-dioxobutanoate	Tryptophan Metabolism	AAA metabolism (Trp/Phe/Tyr)	9.65141e-11	3HKYNAKGAT (1.34e-02, 1.34e-02); r0647 (1.34e-02, 1.34e-02)
nadph	Nicotinamide adenine dinucleotide phosphate - reduced	NADP(+)	Purine Metabolism	Nitrogen disposal	-0.0368721	r0276 (9.71e-01, 9.96e-01); GMPR (9.69e-01, 9.94e-01)
nh4	Ammonium	NH4	Arginine Biosynthesis	AA other (Cys/Met/Lys/Arg/Pro)	-0.78918	GLUNm (4.48e-01, 4.48e-01); GLUDxm (0.00e+00, 3.30e-01); r0034 (5.22e-03, 5.22e-03)
dudp	dUDP	dUDP	Pyrimidine Metabolism	Nucleotide metabolism	-1.52989e-11	URIDK2 (2.41e-02, 2.41e-02); NDPK6m (1.20e-03, 1.20e-03)
fum	Fumarate	Fumarate	Alanine, Aspartate And Glutamate Metabolism	AA central (A/D/E,G/S/T)	1.29607e-10	ADSL1 (4.61e-03, 4.61e-03)
cdp	CDP	CDP	Nucleotide Metabolism	Nucleotide metabolism	2.36515e-11	NDPK3m (2.13e-03, 2.13e-03); CYTK1 (1.72e-03, 1.72e-03); CYTK1m (5.02e-04, 5.02e-04)
h	proton	H	Nitrogen Metabolism	Nitrogen disposal	-0.207063	r1418c (2.37e+00, 2.73e+00); r1418m (5.07e-01, 2.73e-01); GLUDxm (0.00e+00, 3.30e-01); r1418 (3.41e-02, 2.44e-02); r0034 (5.22e-03, 5.22e-03)
succ	Succinate	Succinate	Citric Acid Cycle	Central Energy Metabolism	0.700208	SUCOASm (9.26e-01, 5.70e-01); r0509 (9.26e-01, 5.70e-01)
nadph	Nicotinamide adenine dinucleotide phosphate - reduced	NADP(+)	Ascorbate And Aldarate Metabolism	Ascorbate And Aldarate Metabolism	-0.0804183	DASCBR (3.56e-02, 3.77e-02)
co2	carbon dioxide	CO2	Pyrimidine Synthesis	Nucleotide metabolism	-3.91901e-11	OMPDC (5.22e-03, 5.22e-03)
betald	betaine aldehyde	Betaine aldehyde	Glycine, Serine And Threonine Metabolism	AA central (A/D/E,G/S/T)	-0.0251411	r0552m (2.79e+00, 2.84e+00); r0553m (2.79e+00, 2.84e+00); r0552 (1.26e+00, 1.28e+00); r0553 (1.26e+00, 1.28e+00)
glu__L	L-glutamate(1-)	L-Glu	Nucleotide Metabolism	Nucleotide metabolism	-1.19744e-11	CTPS2 (1.84e-02, 1.84e-02)
gsn	Guanosine	Guanosine	Purine Catabolism	Purine Catabolism	3.50047e-10	PUNP3 (5.02e-04, 5.02e-04)
atp	ATP	ATP/ADP	Nitrogen Metabolism	Nitrogen disposal	-3.91896e-11	r0034 (5.22e-03, 5.22e-03)
ctp	CTP	CTP	Transport, Mitochondrial	Mitochondrial transport	-0.0367438	HUMANGEM_MAR20145 (9.71e-01, 9.96e-01); HUMANGEM_MAR20139 (9.71e-01, 9.96e-01); HUMANGEM_MAR20148 (2.63e-03, 2.63e-03); HUMANGEM_MAR20147 (2.63e-03, 2.63e-03)
adp	ADP	ATP/ADP	Pyrimidine Synthesis	Nucleotide metabolism	-1.19744e-11	CTPS2 (1.84e-02, 1.84e-02)
o2	O2	O2	Extracellular Transport	Extracellular Transport	-0.0798175	O2t (3.59e+00, 3.79e+00)
ura	uracil	Uracil	Pyrimidine Metabolism	Nucleotide metabolism	-1.87457e-11	PYNP2r (2.32e-02, 2.32e-02)
asn__L	L-asparagine	L-asparagine	Pseudoreactions	Pseudoreactions	2.36515e-11	EX_asn__L_e (1.70e-02, 1.70e-02)
dag_hs	diglyceride	Diglyceride	Sphingolipid Metabolism	Lipid metabolism	2.36419e-11	SMS (7.31e-04, 7.31e-04)
dcamp	N6-(1,2-Dicarboxyethyl)-AMP	N6-(1,2-Dicarboxyethyl)-AMP	Alanine, Aspartate And Glutamate Metabolism	AA central (A/D/E,G/S/T)	1.29607e-10	ADSS (4.61e-03, 4.61e-03); ADSL1 (4.61e-03, 4.61e-03)
phe__L	L-phenylalanine	L-Phe	Phenylalanine Metabolism	AAA metabolism (Trp/Phe/Tyr)	0.000241835	PHETA1 (1.10e+01, 1.10e+01); PHETA1m (1.10e+01, 1.10e+01)
gtp	GTP	GTP	Biomass And Maintenance Functions	Biomass And Maintenance Functions	2.36426e-11	BIOMASS_maintenance (3.42e-02, 3.42e-02)
g1p	D-Glucose 1-phosphate	D-Glucose 1-phosphate	Pentose And Glucuronate Interconversions	Redox & Pentose Metabolism	-3.86367e-11	GALU (2.63e-03, 2.63e-03)
fpram	2-(Formamido)-N1-(5-phospho-D-ribosyl)acetamidine	2-(Formamido)-N1-(5-phospho-D-ribosyl)acetamidine	Purine Metabolism	Nitrogen disposal	9.65125e-11	PRFGS (6.71e-03, 6.71e-03)
h	proton	H	Vitamin C Metabolism	Vitamin C Metabolism	-0.0804183	ASCBOX (3.56e-02, 3.77e-02)
ppi	Diphosphate	PPi	Glycerophospholipid Metabolism	Lipid metabolism	-1.36628e-11	CHLPCTD (1.65e-02, 1.65e-02); CDS (1.12e-03, 1.12e-03)
glc__D	D-glucose	Glc	Glycolysis/Gluconeogenesis	Central Energy Metabolism	3.2675e-14	HEX1 (5.00e+00, 5.00e+00)
akg	2-Oxoglutarate	Î±-KG	Cysteine And Methionine Metabolism	AA other (Cys/Met/Lys/Arg/Pro)	-0.740843	PSERT (5.29e-01, 8.83e-01)
icit	Isocitrate	Isocitrate	2-oxocarboxylic Acid Metabolism	2-oxocarboxylic Acid Metabolism	6	ACONTm (3.32e-01, 0.00e+00); ICDHxm (3.32e-01, 0.00e+00)
h	proton	H	Pentose Phosphate Pathway	Redox & Pentose Metabolism	1.80942e-11	PRPPS (3.68e-02, 3.68e-02); G6PDH2r (1.19e-02, 1.19e-02); PGL (1.19e-02, 1.19e-02)
glu__L	L-glutamate(1-)	L-Glu	Pyrimidine Synthesis	Nucleotide metabolism	-1.19744e-11	CTPS2 (1.84e-02, 1.84e-02)
h	proton	H	Folate Metabolism	Folate Metabolism	-0.398428	FTHFDHm (1.06e+00, 1.77e+00); MTHFCm (1.06e+00, 1.77e+00); r0552 (1.26e+00, 1.28e+00); r0553 (1.26e+00, 1.28e+00); GARFT (6.71e-03, 6.71e-03); r0226 (1.20e-03, 1.20e-03)
k	Potassium	Potassium	Extracellular Transport	Extracellular Transport	-6	KCCt (0.00e+00, 1.99e-02); NKCCt (0.00e+00, 1.99e-02)
atp	ATP	ATP/ADP	Pentose Phosphate Pathway	Redox & Pentose Metabolism	5.75592e-12	PRPPS (3.68e-02, 3.68e-02)
gln__L	L-glutamine	L-Gln	Nucleotide Metabolism	Nucleotide metabolism	-1.19744e-11	CTPS2 (1.84e-02, 1.84e-02)
gly	Glycine	Glycine	Biosynthesis Of Amino Acids	Biosynthesis Of Amino Acids	-0.740843	GHMT2rm (5.29e-01, 8.83e-01)
dhf	7,8-Dihydrofolate	7,8-Dihydrofolate	Folate Metabolism	Folate Metabolism	2.36557e-11	r0226 (1.20e-03, 1.20e-03)
adp	ADP	ATP/ADP	Glycerophospholipid Metabolism	Lipid metabolism	-1.66535e-11	CHOLK (1.65e-02, 1.65e-02); DAGK_hs (1.61e-02, 1.61e-02)
coa	Coenzyme A	CoA	Nucleotide Metabolism	Nucleotide metabolism	-1.27753e-11	R_group_phosphotase_1 (1.80e-02, 1.80e-02)
atp	ATP	ATP/ADP	Folate Metabolism	Folate Metabolism	9.65144e-11	FTHFL (1.34e-02, 1.34e-02)
h2o	Water	H2O	Pyruvate Metabolism	Central Energy Metabolism	0.689357	FUMm (9.26e-01, 5.70e-01); FUM (1.13e-02, 1.13e-02)
nh4	Ammonium	NH4	Urea Cycle	Nitrogen disposal	-3.91896e-11	r0034 (5.22e-03, 5.22e-03)
dtdp	dTDP	dTDP	Transport, Mitochondrial	Mitochondrial transport	2.36422e-11	DNDPt14m (1.20e-03, 1.20e-03)
3dsphgn	(2S)-1-hydroxy-3-oxooctadecan-2-aminium	(2S)-1-hydroxy-3-oxooctadecan-2-aminium	Sphingolipid Metabolism	Lipid metabolism	2.36422e-11	SERPT (7.31e-04, 7.31e-04); 3DSPHR (7.31e-04, 7.31e-04)
msa	3-oxopropanoate	3-Oxopropanoate	Inositol Phosphate Metabolism	Inositol Phosphate Metabolism	-6	MMSAD3m (0.00e+00, 9.67e-02)
gly	Glycine	Glycine	Methane Metabolism	Methane Metabolism	-0.740843	GHMT2rm (5.29e-01, 8.83e-01)
pyr	pyruvate	Pyr	Citric Acid Cycle	Central Energy Metabolism	1.77825	PCm (3.32e-01, 9.67e-02)
pi	hydrogenphosphate	HPO4	Glycine, Serine And Threonine Metabolism	AA central (A/D/E,G/S/T)	-0.740843	PSP__Lm (5.29e-01, 8.83e-01)
gar	N1-(5-Phospho-D-ribosyl)glycinamide	N1-(5-Phospho-D-ribosyl)glycinamide	Folate Metabolism	Folate Metabolism	9.65128e-11	GARFT (6.71e-03, 6.71e-03)
tyr__L	L-tyrosine	L-tyrosine	Biomass And Maintenance Functions	Biomass And Maintenance Functions	2.36426e-11	BIOMASS_maintenance (3.42e-02, 3.42e-02)
pep	Phosphoenolpyruvate	Phosphoenolpyruvate	Pyruvate Metabolism	Central Energy Metabolism	0.0554195	PYK (9.41e+00, 9.06e+00)
ser__L	L-serine	L-ser	Pseudoreactions	Pseudoreactions	1.63631e-11	EX_ser__L_e (4.50e-02, 4.50e-02)
q10	ubiquinone-10	Ubiquinone-10	Valine, Leucine And Isoleucine Biosynthesis	BCAA metabolism (Val/Leu/Iso)	-2.84467e-11	r0603 (3.20e-02, 3.20e-02); r0560 (1.53e-02, 1.53e-02)
prpp	5-Phospho-alpha-D-ribose 1-diphosphate	5-Phospho-alpha-D-ribose 1-diphosphate	Pyrimidine Metabolism	Nucleotide metabolism	-3.91896e-11	ORPT (5.22e-03, 5.22e-03)
mlthf	5,10-Methylenetetrahydrofolate	CH2-THF	Cyanoamino Acid Metabolism	Cyanoamino Acid Metabolism	-0.740843	GHMT2rm (5.29e-01, 8.83e-01)
utp	UTP	UTP	Biomass And Maintenance Functions	Biomass And Maintenance Functions	2.36426e-11	BIOMASS_maintenance (3.42e-02, 3.42e-02)
dhcrm_hs	dihydroceramide	Dihydroceramide	Sphingolipid Metabolism	Lipid metabolism	2.36419e-11	DSAT (7.31e-04, 7.31e-04); RE2675C (7.31e-04, 7.31e-04)
mmcoa_S	(S)-methylmalonyl-CoA(5-)	(S)-methylmalonyl-CoA(5-)	Propanoate Metabolism	Propanoate Metabolism	-3.01846e-11	PPCOACm (4.73e-02, 4.73e-02); MMEm (4.73e-02, 4.73e-02)
nadh	Nicotinamide adenine dinucleotide - reduced	NAD(+)	Oxidative Phosphorylation	Oxidative Phosphorylation	0.0530349	NADH2_u10m (6.15e+00, 5.92e+00)
nadh	Nicotinamide adenine dinucleotide - reduced	NAD(+)	Lysine Metabolism	AA other (Cys/Met/Lys/Arg/Pro)	-6	r0594m (0.00e+00, 9.19e-03); r0525 (0.00e+00, 9.19e-03); 2OXOADOXm (0.00e+00, 9.19e-03)
ala__L	L-alanine	L-Ala	Pseudoreactions	Pseudoreactions	-6	EX_ala__L_e (0.00e+00, 3.11e-02)
gmp	GMP	GMP	Purine Catabolism	Purine Catabolism	-0.0368328	r0276 (9.71e-01, 9.96e-01)
h2o	Water	H2O	Fatty Acid Biosynthesis	Lipid metabolism	-2.32668e-11	FAS140COA (1.84e-02, 1.84e-02); FAS100COA (1.84e-02, 1.84e-02); FAS120COA (1.84e-02, 1.84e-02); FAS80COA__L (1.84e-02, 1.84e-02); FAS160COA (1.84e-02, 1.84e-02)
nad	Nicotinamide adenine dinucleotide	NAD(+)	Glycine, Serine And Threonine Metabolism	AA central (A/D/E,G/S/T)	-0.128322	r0552m (2.79e+00, 2.84e+00); r0552 (1.26e+00, 1.28e+00); PGCD (5.29e-01, 8.83e-01)
L2aadp6sa	L-allysine	L-allysine	Lysine Metabolism	AA other (Cys/Met/Lys/Arg/Pro)	-6	r0525 (0.00e+00, 9.19e-03); r0594m (0.00e+00, 9.19e-03)
nadh	Nicotinamide adenine dinucleotide - reduced	NAD(+)	Valine, Leucine And Isoleucine Degradation	BCAA metabolism (Val/Leu/Iso)	-2.84466e-11	HACD9m (3.20e-02, 3.20e-02); MMSAD1m (1.53e-02, 1.53e-02)
gln__L	L-glutamine	L-Gln	Pyrimidine Synthesis	Nucleotide metabolism	-1.19744e-11	CTPS2 (1.84e-02, 1.84e-02)
gua	Guanine	Guanine	Nucleotide Metabolism	Nucleotide metabolism	-9.27664e-12	GUAPRT (2.49e-02, 2.49e-02); PUNP4 (2.44e-02, 2.44e-02); PUNP3 (5.02e-04, 5.02e-04)
pe_hs	Phosphatidylethanolamine (gallus gallus)	Phosphatidylethanolamine (gallus gallus)	Biomass And Maintenance Functions	Biomass And Maintenance Functions	2.36426e-11	BIOMASS_maintenance (3.42e-02, 3.42e-02)
nadph	Nicotinamide adenine dinucleotide phosphate - reduced	NADP(+)	Nucleotide Metabolism	Nucleotide metabolism	-0.0368721	r0276 (9.71e-01, 9.96e-01); GMPR (9.69e-01, 9.94e-01)
aacoa	Acetoacetyl-CoA	Acetoacetyl-CoA	Valine, Leucine And Isoleucine Degradation	BCAA metabolism (Val/Leu/Iso)	0.415037	HMGCOASim (9.19e-03, 9.19e-03); AACOAT (9.19e-03, 9.19e-03); ACACT1r (9.19e-03, 9.19e-03); ACACT1rm (9.19e-03, 0.00e+00)
cys__L	L-cysteine	L-Cys	Pseudoreactions	Pseudoreactions	1.33304	EX_cys__L_e (2.42e-02, 9.61e-03)
r1p	alpha-D-Ribose 1-phosphate	Alpha-D-Ribose 1-phosphate	Purine Metabolism	Nitrogen disposal	-1.01645e-12	PPM (2.49e-02, 2.49e-02); PUNP1 (1.20e-03, 1.20e-03); PUNP3 (5.02e-04, 5.02e-04)
pglyc_hs	phosphatidylglycerol(1-)	Phosphatidylglycerol(1-)	Glycerophospholipid Metabolism	Lipid metabolism	2.36567e-11	PGPP_hs (2.77e-04, 2.77e-04); CLSm_hs (2.26e-04, 2.26e-04)
dgdp	dGDP	dGDP	Purine Metabolism	Nitrogen disposal	2.36435e-11	NDPK5 (8.62e-04, 8.62e-04)
nadh	Nicotinamide adenine dinucleotide - reduced	NAD(+)	2-oxocarboxylic Acid Metabolism	2-oxocarboxylic Acid Metabolism	1.63969	AKGDm (8.78e-01, 5.22e-01); PDHm (4.47e-01, 0.00e+00); ICDHxm (3.32e-01, 0.00e+00); 2OXOADOXm (0.00e+00, 9.19e-03)
pyr	pyruvate	Pyr	2-oxocarboxylic Acid Metabolism	2-oxocarboxylic Acid Metabolism	6	PDHm (4.47e-01, 0.00e+00); ALATA__L (3.11e-02, 0.00e+00)
ade	Adenine	Adenine	Purine Metabolism	Nitrogen disposal	2.35445e-11	PUNP2 (1.20e-03, 1.20e-03); PUNP1 (1.20e-03, 1.20e-03)
h	proton	H	Oxidative Phosphorylation	Oxidative Phosphorylation	-0.0431101	ATPS4m (1.15e+01, 1.20e+01); CYOR_u10m (7.12e+00, 7.53e+00); NADH2_u10m (6.15e+00, 5.92e+00); CYOOm3 (3.56e+00, 3.77e+00); PPAm (3.93e-01, 3.93e-01)
L2aadp	L-2-aminoadipate(1-)	Adipates	Lysine Biosynthesis	Lysine Biosynthesis	-6	r0450 (0.00e+00, 9.19e-03)
akg	2-Oxoglutarate	Î±-KG	Methane Metabolism	Methane Metabolism	-0.740843	PSERT (5.29e-01, 8.83e-01)
accoa	Acetyl-CoA	Acetyl-CoA	Beta-alanine Metabolism	Beta-alanine Metabolism	-6	MMSAD3m (0.00e+00, 9.67e-02)
h	proton	H	Valine, Leucine And Isoleucine Degradation	BCAA metabolism (Val/Leu/Iso)	-2.79882e-11	PPCOACm (4.73e-02, 4.73e-02); HACD9m (3.20e-02, 3.20e-02); 3HBCOAHLm (1.53e-02, 1.53e-02); HMGCOASim (9.19e-03, 9.19e-03)
atp	ATP	ATP/ADP	Oxidative Phosphorylation	Oxidative Phosphorylation	-0.0582893	ATPS4m (1.15e+01, 1.20e+01)
pi	hydrogenphosphate	HPO4	Purine Catabolism	Purine Catabolism	-7.77279e-12	PUNP4 (2.44e-02, 2.44e-02); PUNP2 (1.20e-03, 1.20e-03); PUNP3 (5.02e-04, 5.02e-04)
6pgc	6-Phospho-D-gluconate	6-Phospho-D-gluconate	Glutathione Metabolism	Redox & Pentose Metabolism	3.71447e-11	GND (1.19e-02, 1.19e-02)
Rtotalcoa	R total Coenzyme A	R total Coenzyme A	Sphingolipid Metabolism	Lipid metabolism	2.36419e-11	DSAT (7.31e-04, 7.31e-04)
accoa	Acetyl-CoA	Acetyl-CoA	Valine, Leucine And Isoleucine Biosynthesis	BCAA metabolism (Val/Leu/Iso)	-1.63798e-11	ACACT10m (3.20e-02, 3.20e-02)
trp__L	L-tryptophan	L-tryptophan	Pseudoreactions	Pseudoreactions	6.9236e-11	EX_trp__L_e (2.14e-02, 2.14e-02)
accoa	Acetyl-CoA	Acetyl-CoA	Terpenoid Backbone Biosynthesis	Terpenoid Backbone Biosynthesis	0.584963	HMGCOASim (9.19e-03, 9.19e-03); ACACT1r (9.19e-03, 9.19e-03); ACACT1rm (9.19e-03, 0.00e+00)
atp	ATP	ATP/ADP	Valine, Leucine And Isoleucine Degradation	BCAA metabolism (Val/Leu/Iso)	-2.76039e-11	PPCOACm (4.73e-02, 4.73e-02); AACOAT (9.19e-03, 9.19e-03)
gly	Glycine	Glycine	Glutathione Metabolism	Redox & Pentose Metabolism	0.838556	AMPTASECG (3.31e-02, 1.85e-02)
glu__L	L-glutamate(1-)	L-Glu	Pseudoreactions	Pseudoreactions	0	EX_glu__L_e (5.00e-02, 5.00e-02)
pi	hydrogenphosphate	HPO4	Fatty Acid Degradation	Lipid metabolism	-2.32668e-11	ACCOACm (1.29e-01, 1.29e-01)
nadh	Nicotinamide adenine dinucleotide - reduced	NAD(+)	Fatty Acid Metabolism	Lipid metabolism	-6	HACD1m (0.00e+00, 9.19e-03)
h2o	Water	H2O	Sphingolipid Metabolism	Lipid metabolism	2.36416e-11	RE2675C (7.31e-04, 7.31e-04)
ascb__L	L-ascorbate	L-ascorbate	Vitamin C Metabolism	Vitamin C Metabolism	-0.0804183	ASCBOX (3.56e-02, 3.77e-02)
thr__L	L-Threonine	L-Thr	Extracellular Transport	Extracellular Transport	2.36525e-11	THRt4 (3.11e-02, 3.11e-02); r1402 (8.78e-04, 8.78e-04)
co2	carbon dioxide	CO2	Glycine, Serine And Threonine Metabolism	AA central (A/D/E,G/S/T)	-0.740843	GCC2am (5.29e-01, 8.83e-01)
lac__L	(S)-lactate	(S)-lactate	Pseudoreactions	Pseudoreactions	0.0506976	EX_lac__L_e (9.37e+00, 9.05e+00)
cytd	Cytidine	Cytidine	Extracellular Transport	Extracellular Transport	-1.90694e-11	CYTDt (1.54e-02, 1.54e-02)
leu__L	L-leucine	L-leucine	Extracellular Transport	Extracellular Transport	2.36567e-11	r1402 (8.78e-04, 8.78e-04)
dtmp	dTMP	dTMP	Pyrimidine Synthesis	Nucleotide metabolism	2.36422e-11	RE0452M (1.20e-03, 1.20e-03)
glc__D	D-glucose	Glc	Pseudoreactions	Pseudoreactions	3.2675e-14	EX_glc__D_e (5.00e+00, 5.00e+00)
nad	Nicotinamide adenine dinucleotide	NAD(+)	Fatty Acid Degradation	Lipid metabolism	-6	HACD1m (0.00e+00, 9.19e-03)
pail_hs	1-phosphatidyl-1D-myo-inositol(1-)	1-Phosphatidyl-1D-myo-inositol(1-)	Glycerophospholipid Metabolism	Lipid metabolism	2.36557e-11	CDIPTr (6.22e-04, 6.22e-04)
aacoa	Acetoacetyl-CoA	Acetoacetyl-CoA	Fatty Acid Metabolism	Lipid metabolism	-3.219e-11	HACD1m (0.00e+00, 9.19e-03); ACACT1r (9.19e-03, 9.19e-03); ACACT1rm (9.19e-03, 0.00e+00)
malcoa	Malonyl-CoA	Malonyl-CoA	Fatty Acid Metabolism	Lipid metabolism	-2.32668e-11	ACCOACm (1.29e-01, 1.29e-01)
3mob	3-methyl-2-oxobutanoate	Î±-Ketoisovalerate	2-oxocarboxylic Acid Metabolism	2-oxocarboxylic Acid Metabolism	-5.37022e-11	VALTA (1.53e-02, 1.53e-02)
dadp	dADP	dADP	Nucleotide Interconversion	Nucleotide metabolism	2.36426e-11	NDPK8 (2.39e-03, 2.39e-03); ADKd (1.20e-03, 1.20e-03); NDPK8m (1.20e-03, 1.20e-03)
hco3	Bicarbonate	HCO3	Pseudoreactions	Pseudoreactions	-0.214742	EX_hco3_e (2.33e+00, 2.71e+00)
prpp	5-Phospho-alpha-D-ribose 1-diphosphate	5-Phospho-alpha-D-ribose 1-diphosphate	Pentose Phosphate Pathway	Redox & Pentose Metabolism	5.75592e-12	PRPPS (3.68e-02, 3.68e-02)
akg	2-Oxoglutarate	Î±-KG	Beta-alanine Metabolism	Beta-alanine Metabolism	-6	APAT2rm (0.00e+00, 9.67e-02)
nadh	Nicotinamide adenine dinucleotide - reduced	NAD(+)	Arginine Biosynthesis	AA other (Cys/Met/Lys/Arg/Pro)	-6	GLUDxm (0.00e+00, 3.30e-01)
ump	UMP	UMP	Pyrimidine Metabolism	Nucleotide metabolism	-2.65282e-11	NTD2 (7.85e-03, 7.85e-03); OMPDC (5.22e-03, 5.22e-03)
dadp	dADP	dADP	Purine Metabolism	Nitrogen disposal	2.36426e-11	NDPK8 (2.39e-03, 2.39e-03); NDPK8m (1.20e-03, 1.20e-03)
glu__L	L-glutamate(1-)	L-Glu	Glycine, Serine And Threonine Metabolism	AA central (A/D/E,G/S/T)	-0.740843	PSERT (5.29e-01, 8.83e-01)
akg	2-Oxoglutarate	Î±-KG	Valine, Leucine And Isoleucine Biosynthesis	BCAA metabolism (Val/Leu/Iso)	-2.84466e-11	ILETA (3.20e-02, 3.20e-02); VALTA (1.53e-02, 1.53e-02)
pi	hydrogenphosphate	HPO4	Propanoate Metabolism	Propanoate Metabolism	0.562984	SUCOASm (9.26e-01, 5.70e-01); ACCOACm (1.29e-01, 1.29e-01); PPCOACm (4.73e-02, 4.73e-02)
dgsn	Deoxyguanosine	Deoxyguanosine	Purine Metabolism	Nitrogen disposal	-1.66706e-11	PUNP4 (2.44e-02, 2.44e-02); NTD8 (2.44e-02, 2.44e-02)
pyr	pyruvate	Pyr	Arginine Biosynthesis	AA other (Cys/Met/Lys/Arg/Pro)	6	ALATA__L (3.11e-02, 0.00e+00)
h	proton	H	Fatty Acid Metabolism	Lipid metabolism	-0.0995357	ACCOACm (1.29e-01, 1.29e-01); HACD1m (0.00e+00, 9.19e-03)
atp	ATP	ATP/ADP	Fatty Acid Metabolism	Lipid metabolism	-2.32668e-11	ACCOACm (1.29e-01, 1.29e-01)
r1p	alpha-D-Ribose 1-phosphate	Alpha-D-Ribose 1-phosphate	Nucleotide Metabolism	Nucleotide metabolism	-9.27696e-12	PYNP2r (2.32e-02, 2.32e-02); PUNP1 (1.20e-03, 1.20e-03); PUNP3 (5.02e-04, 5.02e-04)
pi	hydrogenphosphate	HPO4	Pyruvate Metabolism	Central Energy Metabolism	1.03033	PCm (3.32e-01, 9.67e-02); ACCOACm (1.29e-01, 1.29e-01)
gtp	GTP	GTP	Purine Metabolism	Nitrogen disposal	1.17105e-10	NDPK1 (5.85e-03, 5.85e-03); ADSS (4.61e-03, 4.61e-03)
f6p	D-Fructose 6-phosphate	D-Fructose 6-phosphate	Glycolysis/Gluconeogenesis	Central Energy Metabolism	-8.00857e-14	PFK (4.98e+00, 4.98e+00); PGI (4.98e+00, 4.98e+00)
o2	O2	O2	Transport, Mitochondrial	Mitochondrial transport	-0.0804183	O2tm (3.56e+00, 3.77e+00)
nad	Nicotinamide adenine dinucleotide	NAD(+)	Propanoate Metabolism	Propanoate Metabolism	-6	MMSAD3m (0.00e+00, 9.67e-02)
acac	acetoacetate	Acetoacetate	Valine, Leucine And Isoleucine Degradation	BCAA metabolism (Val/Leu/Iso)	-2.3267e-11	HMGLm (9.19e-03, 9.19e-03); AACOAT (9.19e-03, 9.19e-03)
akg	2-Oxoglutarate	Î±-KG	Taurine And Hypotaurine Metabolism	Taurine And Hypotaurine Metabolism	-6	GLUDxm (0.00e+00, 3.30e-01)
cbasp	N-Carbamoyl-L-aspartate	N-Carbamoyl-L-aspartate	Alanine, Aspartate And Glutamate Metabolism	AA central (A/D/E,G/S/T)	-3.91896e-11	ASPCTr (5.22e-03, 5.22e-03)
nadp	Nicotinamide adenine dinucleotide phosphate	NADP(+)	Tryptophan Metabolism	AAA metabolism (Trp/Phe/Tyr)	9.65141e-11	KYN3OX (1.34e-02, 1.34e-02)
thf	5,6,7,8-Tetrahydrofolate	THF	Alanine, Aspartate And Glutamate Metabolism	AA central (A/D/E,G/S/T)	-0.740843	GCC2bim (5.29e-01, 8.83e-01); GHMT2rm (5.29e-01, 8.83e-01)
nad	Nicotinamide adenine dinucleotide	NAD(+)	Pyruvate Metabolism	Central Energy Metabolism	-0.000279459	LDH__L (9.37e+00, 9.05e+00); MDH (1.68e-01, 4.94e-01)
10fthf	10-Formyltetrahydrofolate	10-Formyltetrahydrofolate	Purine Synthesis	Nucleotide metabolism	9.65138e-11	GARFT (6.71e-03, 6.71e-03); AICART (6.71e-03, 6.71e-03)
akg	2-Oxoglutarate	Î±-KG	Lysine Biosynthesis	Lysine Biosynthesis	-6	r0450 (0.00e+00, 9.19e-03)
pi	hydrogenphosphate	HPO4	Pyrimidine Catabolism	Nucleotide metabolism	-1.85856e-11	PYNP2r (2.32e-02, 2.32e-02); NTD2 (7.85e-03, 7.85e-03)
ctp	CTP	CTP	Nucleotide Metabolism	Nucleotide metabolism	-8.27894e-12	CTPS2 (1.84e-02, 1.84e-02); NDPK3m (2.13e-03, 2.13e-03)
pi	hydrogenphosphate	HPO4	Fatty Acid Biosynthesis	Lipid metabolism	-2.32668e-11	ACCOACm (1.29e-01, 1.29e-01)
cgly	L-cysteinylglycine	L-cysteinylglycine	Pseudoreactions	Pseudoreactions	6	EX_cgly_e (9.76e-03, 0.00e+00)
mmcoa_R	(R)-methylmalonyl-CoA(5-)	(R)-methylmalonyl-CoA(5-)	Propanoate Metabolism	Propanoate Metabolism	-3.19225e-11	MMMm (4.73e-02, 4.73e-02); MMEm (4.73e-02, 4.73e-02)
pa_hs	phosphatidate(2-)	PhosphatidAte(2-)	Biomass And Maintenance Functions	Biomass And Maintenance Functions	2.36426e-11	BIOMASS_maintenance (3.42e-02, 3.42e-02)
h	proton	H	Arginine Biosynthesis	AA other (Cys/Met/Lys/Arg/Pro)	-6.00417	GLUDxm (0.00e+00, 3.30e-01); r0034 (5.22e-03, 5.22e-03)
dhor_S	(S)-dihydroorotate	(S)-dihydroorotate	Transport, Mitochondrial	Mitochondrial transport	-3.91896e-11	DHORD9 (5.22e-03, 5.22e-03)
amp	AMP	AMP	Pentose Phosphate Pathway	Redox & Pentose Metabolism	5.75592e-12	PRPPS (3.68e-02, 3.68e-02)
sphmyln_hs	sphingomyelin betaine	Sphingomyelin betaine	Biomass And Maintenance Functions	Biomass And Maintenance Functions	2.36426e-11	BIOMASS_maintenance (3.42e-02, 3.42e-02)
atp	ATP	ATP/ADP	Arginine Biosynthesis	AA other (Cys/Met/Lys/Arg/Pro)	-3.91896e-11	r0034 (5.22e-03, 5.22e-03)
3hbcoa	(S)-3-hydroxybutanoyl-CoA(4-)	SC acyl-CoA	Fatty Acid Metabolism	Lipid metabolism	-6	HACD1m (0.00e+00, 9.19e-03); ECOAH1m (0.00e+00, 9.19e-03)
lys__L	L-lysinium(1+)	Lys	Extracellular Transport	Extracellular Transport	5.53765	ARGLYSex (1.99e-02, 0.00e+00); r1402 (8.78e-04, 8.78e-04)
lpam	lipoamide	Lipoamide	Glycolysis/Gluconeogenesis	Central Energy Metabolism	-0.692469	GCC2cm (5.76e-01, 9.31e-01)
val__L	L-valine	L-Val	Valine, Leucine And Isoleucine Degradation	BCAA metabolism (Val/Leu/Iso)	-5.37022e-11	VALTA (1.53e-02, 1.53e-02)
adp	ADP	ATP/ADP	Fatty Acid Degradation	Lipid metabolism	-2.32668e-11	ACCOACm (1.29e-01, 1.29e-01)
h2o	Water	H2O	Nitrogen Metabolism	Nitrogen disposal	-0.207063	r1418c (2.37e+00, 2.73e+00); r1418m (5.07e-01, 2.73e-01); GLUDxm (0.00e+00, 3.30e-01); r1418 (3.41e-02, 2.44e-02); r0034 (5.22e-03, 5.22e-03)
dad_2	Deoxyadenosine	dA	Purine Catabolism	Purine Catabolism	2.35465e-11	PUNP2 (1.20e-03, 1.20e-03)
thf	5,6,7,8-Tetrahydrofolate	THF	Purine Synthesis	Nucleotide metabolism	9.65138e-11	GARFT (6.71e-03, 6.71e-03); AICART (6.71e-03, 6.71e-03)
ctp	CTP	CTP	Pyrimidine Synthesis	Nucleotide metabolism	-1.19744e-11	CTPS2 (1.84e-02, 1.84e-02)
o2s	superoxide	Superoxide	Vitamin C Metabolism	Vitamin C Metabolism	-0.0804183	ASCBOX (3.56e-02, 3.77e-02)
nadh	Nicotinamide adenine dinucleotide - reduced	NAD(+)	Alanine, Aspartate And Glutamate Metabolism	AA central (A/D/E,G/S/T)	-0.220343	r0552m (2.79e+00, 2.84e+00); r0552 (1.26e+00, 1.28e+00); PGCD (5.29e-01, 8.83e-01); GLUDxm (0.00e+00, 3.30e-01)
nad	Nicotinamide adenine dinucleotide	NAD(+)	Beta-alanine Metabolism	Beta-alanine Metabolism	-6	MMSAD3m (0.00e+00, 9.67e-02)
dtdp	dTDP	dTDP	Nucleotide Metabolism	Nucleotide metabolism	2.36426e-11	NDPK4n (1.20e-03, 1.20e-03)
pser__L	O-Phospho-L-serine	O-Phospho-L-serine	Alanine, Aspartate And Glutamate Metabolism	AA central (A/D/E,G/S/T)	-0.740843	PSP__Lm (5.29e-01, 8.83e-01); PSERT (5.29e-01, 8.83e-01)
fum	Fumarate	Fumarate	Purine Metabolism	Nitrogen disposal	1.09998e-10	ADSL2 (6.71e-03, 6.71e-03); ADSL1 (4.61e-03, 4.61e-03)
r5p	alpha-D-Ribose 5-phosphate	Alpha-D-Ribose 5-phosphate	Purine Metabolism	Nitrogen disposal	-3.0833e-13	PRPPS (3.68e-02, 3.68e-02); PPM (2.49e-02, 2.49e-02)
aicar	5-Amino-1-(5-Phospho-D-ribosyl)imidazole-4-carboxamide	5-Amino-1-(5-Phospho-D-ribosyl)imidAzole-4-carboxamide	Purine Metabolism	Nitrogen disposal	9.65148e-11	AICART (6.71e-03, 6.71e-03); ADSL2 (6.71e-03, 6.71e-03)
glyc3p	Glycerol 3-phosphate	Glycerol 3-phosphate	Transport, Mitochondrial	Mitochondrial transport	2.36579e-11	HUMANGEM_MAR08891 (2.77e-04, 2.77e-04)
gsn	Guanosine	Guanosine	Nucleotide Interconversion	Nucleotide metabolism	3.50047e-10	NTD9m (5.02e-04, 5.02e-04)
2pg	D-Glycerate 2-phosphate	D-Glycerate 2-phosphate	Methane Metabolism	Methane Metabolism	0.0554195	ENO (9.41e+00, 9.06e+00); PGM (9.41e+00, 9.06e+00)
pyr	pyruvate	Pyr	Alanine, Aspartate And Glutamate Metabolism	AA central (A/D/E,G/S/T)	6	ALATA__L (3.11e-02, 0.00e+00)
nh4	Ammonium	NH4	Taurine And Hypotaurine Metabolism	Taurine And Hypotaurine Metabolism	-6	GLUDxm (0.00e+00, 3.30e-01)
nadph	Nicotinamide adenine dinucleotide phosphate - reduced	NADP(+)	Glycine, Serine And Threonine Metabolism	AA central (A/D/E,G/S/T)	-0.0251411	r0553m (2.79e+00, 2.84e+00); r0553 (1.26e+00, 1.28e+00)
h2o	Water	H2O	Pentose Phosphate Pathway	Redox & Pentose Metabolism	3.71447e-11	PGL (1.19e-02, 1.19e-02)
h	proton	H	Urea Cycle	Nitrogen disposal	-3.91896e-11	r0034 (5.22e-03, 5.22e-03)
dadp	dADP	dADP	Nucleotide Metabolism	Nucleotide metabolism	2.36426e-11	NDPK8 (2.39e-03, 2.39e-03); NDPK8m (1.20e-03, 1.20e-03)
co2	carbon dioxide	CO2	Propanoate Metabolism	Propanoate Metabolism	-6	MMSAD3m (0.00e+00, 9.67e-02)
dgsn	Deoxyguanosine	Deoxyguanosine	Nucleotide Metabolism	Nucleotide metabolism	-1.66706e-11	PUNP4 (2.44e-02, 2.44e-02); NTD8 (2.44e-02, 2.44e-02)
h2o	Water	H2O	Folate Metabolism	Folate Metabolism	-0.438058	FTHFDHm (1.06e+00, 1.77e+00); MTHFCm (1.06e+00, 1.77e+00); r0552 (1.26e+00, 1.28e+00); r0553 (1.26e+00, 1.28e+00); GHMT2rm (5.29e-01, 8.83e-01)
thr__L	L-Threonine	L-Thr	Biomass And Maintenance Functions	Biomass And Maintenance Functions	2.36426e-11	BIOMASS_maintenance (3.42e-02, 3.42e-02)
icit	Isocitrate	Isocitrate	Biosynthesis Of Amino Acids	Biosynthesis Of Amino Acids	6	ACONTm (3.32e-01, 0.00e+00); ICDHxm (3.32e-01, 0.00e+00)
b2coa	crotonoyl-CoA(4-)	SC acyl-CoA	Fatty Acid Metabolism	Lipid metabolism	-6	ECOAH1m (0.00e+00, 9.19e-03)
cbp	Carbamoyl phosphate	Carbamoyl phosphate	Alanine, Aspartate And Glutamate Metabolism	AA central (A/D/E,G/S/T)	-3.91896e-11	r0034 (5.22e-03, 5.22e-03); ASPCTr (5.22e-03, 5.22e-03)
atp	ATP	ATP/ADP	Urea Cycle	Nitrogen disposal	-3.91896e-11	r0034 (5.22e-03, 5.22e-03)
adp	ADP	ATP/ADP	Propanoate Metabolism	Propanoate Metabolism	0.562984	SUCOASm (9.26e-01, 5.70e-01); ACCOACm (1.29e-01, 1.29e-01); PPCOACm (4.73e-02, 4.73e-02)
dcamp	N6-(1,2-Dicarboxyethyl)-AMP	N6-(1,2-Dicarboxyethyl)-AMP	Purine Metabolism	Nitrogen disposal	1.29607e-10	ADSS (4.61e-03, 4.61e-03); ADSL1 (4.61e-03, 4.61e-03)
leu__L	L-leucine	L-leucine	Biomass And Maintenance Functions	Biomass And Maintenance Functions	2.36426e-11	BIOMASS_maintenance (3.42e-02, 3.42e-02)
lac__L	(S)-lactate	(S)-lactate	Transport, Endosomal	Transport, Endosomal	0.0506976	L__LACt2r (9.37e+00, 9.05e+00)
didp	dIDP	DIDP	Purine Metabolism	Nitrogen disposal	-1.13494e-10	NDPK10 (1.20e-03, 1.20e-03); NDPK10n (1.20e-03, 1.20e-03)
ctp	CTP	CTP	Glycerophospholipid Metabolism	Lipid metabolism	-1.36628e-11	CHLPCTD (1.65e-02, 1.65e-02); CDS (1.12e-03, 1.12e-03)
co2	carbon dioxide	CO2	Pyruvate Metabolism	Central Energy Metabolism	3.13604	ME2m (7.69e-01, 8.75e-02)
dhap	Dihydroxyacetone phosphate	DHAP	Glycerophospholipid Metabolism	Lipid metabolism	-7.84245	r0202c (8.55e-03, 9.85e-01); r0205 (0.00e+00, 9.77e-01)
dtdp	dTDP	dTDP	Pyrimidine Synthesis	Nucleotide metabolism	2.36422e-11	RE0452M (1.20e-03, 1.20e-03)
L2aadp6sa	L-allysine	L-allysine	Lysine Degradation	AA other (Cys/Met/Lys/Arg/Pro)	-6	r0525 (0.00e+00, 9.19e-03)
gtp	GTP	GTP	Nucleotide Metabolism	Nucleotide metabolism	1.17105e-10	NDPK1 (5.85e-03, 5.85e-03); ADSS (4.61e-03, 4.61e-03)
q10	ubiquinone-10	Ubiquinone-10	Citric Acid Cycle	Central Energy Metabolism	0.700208	r0509 (9.26e-01, 5.70e-01)
adp	ADP	ATP/ADP	Pyruvate Metabolism	Central Energy Metabolism	0.0888298	PYK (9.41e+00, 9.06e+00); PCm (3.32e-01, 9.67e-02); ACCOACm (1.29e-01, 1.29e-01)
3php	3-phosphonatooxypyruvate(3-)	3-PHP	Alanine, Aspartate And Glutamate Metabolism	AA central (A/D/E,G/S/T)	-0.740843	PSERT (5.29e-01, 8.83e-01); PGCD (5.29e-01, 8.83e-01)
phe__L	L-phenylalanine	L-Phe	Biosynthesis Of Amino Acids	Biosynthesis Of Amino Acids	0.000241835	PHETA1 (1.10e+01, 1.10e+01); PHETA1m (1.10e+01, 1.10e+01)
dutp	dUTP	DUTP	Nucleotide Metabolism	Nucleotide metabolism	2.36416e-11	NDPK6m (1.20e-03, 1.20e-03)
aicar	5-Amino-1-(5-Phospho-D-ribosyl)imidazole-4-carboxamide	5-Amino-1-(5-Phospho-D-ribosyl)imidAzole-4-carboxamide	Folate Metabolism	Folate Metabolism	9.65144e-11	AICART (6.71e-03, 6.71e-03)
pgp_hs	phosphatidyl glycerol phosphate	Phosphatidyl glycerol phosphate	Glycerophospholipid Metabolism	Lipid metabolism	2.36576e-11	PGPPTm (2.77e-04, 2.77e-04); PGPP_hs (2.77e-04, 2.77e-04)
sphmyln_hs	sphingomyelin betaine	Sphingomyelin betaine	Sphingolipid Metabolism	Lipid metabolism	2.36419e-11	SMS (7.31e-04, 7.31e-04)
thf	5,6,7,8-Tetrahydrofolate	THF	Biosynthesis Of Amino Acids	Biosynthesis Of Amino Acids	-0.740843	GHMT2rm (5.29e-01, 8.83e-01)
h	proton	H	Alanine, Aspartate And Glutamate Metabolism	AA central (A/D/E,G/S/T)	-0.174795	r0553m (2.79e+00, 2.84e+00); r0552m (2.79e+00, 2.84e+00); r0552 (1.26e+00, 1.28e+00); r0553 (1.26e+00, 1.28e+00); GCC2am (5.29e-01, 8.83e-01); PGCD (5.29e-01, 8.83e-01); GLUDxm (0.00e+00, 3.30e-01); ASPCTr (5.22e-03, 5.22e-03); r0034 (5.22e-03, 5.22e-03); ADSS (4.61e-03, 4.61e-03)
coa	Coenzyme A	CoA	Fatty Acid Degradation	Lipid metabolism	1	ACACT1r (9.19e-03, 9.19e-03); ACACT1rm (9.19e-03, 0.00e+00)
dadp	dADP	dADP	Pyrimidine Synthesis	Nucleotide metabolism	2.36422e-11	RE0452M (1.20e-03, 1.20e-03)
atp	ATP	ATP/ADP	Alanine, Aspartate And Glutamate Metabolism	AA central (A/D/E,G/S/T)	-3.91896e-11	r0034 (5.22e-03, 5.22e-03)
3php	3-phosphonatooxypyruvate(3-)	3-PHP	Cysteine And Methionine Metabolism	AA other (Cys/Met/Lys/Arg/Pro)	-0.740843	PSERT (5.29e-01, 8.83e-01); PGCD (5.29e-01, 8.83e-01)
amp	AMP	AMP	Valine, Leucine And Isoleucine Degradation	BCAA metabolism (Val/Leu/Iso)	-2.32666e-11	AACOAT (9.19e-03, 9.19e-03)
glu__L	L-glutamate(1-)	L-Glu	Propanoate Metabolism	Propanoate Metabolism	-6	APAT2rm (0.00e+00, 9.67e-02)
co2	carbon dioxide	CO2	Fatty Acid Biosynthesis	Lipid metabolism	-2.32668e-11	FAS140COA (1.84e-02, 1.84e-02); FAS100COA (1.84e-02, 1.84e-02); FAS120COA (1.84e-02, 1.84e-02); FAS80COA__L (1.84e-02, 1.84e-02); FAS160COA (1.84e-02, 1.84e-02)
thf	5,6,7,8-Tetrahydrofolate	THF	Methane Metabolism	Methane Metabolism	-0.740843	GHMT2rm (5.29e-01, 8.83e-01)
asp__L	L-aspartate(1-)	L-aspartate(1-)	Beta-alanine Metabolism	Beta-alanine Metabolism	-6	ASP1DCm (0.00e+00, 9.67e-02)
h	proton	H	Cysteine And Methionine Metabolism	AA other (Cys/Met/Lys/Arg/Pro)	-0.740843	PGCD (5.29e-01, 8.83e-01)
mal__L	(S)-malate(2-)	(S)-malate(2-)	Transport, Mitochondrial	Mitochondrial transport	0.0224104	MALtm (1.06e+01, 1.06e+01); AKGMALtm (1.05e+01, 1.02e+01)
adp	ADP	ATP/ADP	Fatty Acid Biosynthesis	Lipid metabolism	-2.32668e-11	ACCOACm (1.29e-01, 1.29e-01)
dump	dUMP	DUMP	Nucleotide Metabolism	Nucleotide metabolism	-1.72338e-11	URIDK2 (2.41e-02, 2.41e-02)
coa	Coenzyme A	CoA	Lysine Degradation	AA other (Cys/Met/Lys/Arg/Pro)	1	ACACT1r (9.19e-03, 9.19e-03); ACACT1rm (9.19e-03, 0.00e+00)
gmp	GMP	GMP	Nucleotide Interconversion	Nucleotide metabolism	-0.0359231	GMPR (9.69e-01, 9.94e-01); GK1 (2.65e-02, 2.65e-02); NTD9m (5.02e-04, 5.02e-04)
utp	UTP	UTP	Nucleotide Metabolism	Nucleotide metabolism	-1.19744e-11	CTPS2 (1.84e-02, 1.84e-02)
h	proton	H	Purine Synthesis	Nucleotide metabolism	9.65141e-11	PRAGSr (6.71e-03, 6.71e-03); GARFT (6.71e-03, 6.71e-03); PRFGS (6.71e-03, 6.71e-03); r0666 (6.71e-03, 6.71e-03); AIRCr (6.71e-03, 6.71e-03); PRASCS (6.71e-03, 6.71e-03)
o2s	superoxide	Superoxide	Oxidative Phosphorylation	Oxidative Phosphorylation	-0.0804183	CYOOm3 (3.56e+00, 3.77e+00)
ps_hs	phosphatidylserine	Phosphatidylserine	Extracellular Transport	Extracellular Transport	-1.68351e-10	PSFLIP (1.71e-03, 1.71e-03)
aacoa	Acetoacetyl-CoA	Acetoacetyl-CoA	Synthesis And Degradation Of Ketone Bodies	Lipid metabolism	-2.3267e-11	HMGCOASim (9.19e-03, 9.19e-03)
nadph	Nicotinamide adenine dinucleotide phosphate - reduced	NADP(+)	Purine Catabolism	Purine Catabolism	-0.0368328	r0276 (9.71e-01, 9.96e-01)
nadh	Nicotinamide adenine dinucleotide - reduced	NAD(+)	Tryptophan Metabolism	AAA metabolism (Trp/Phe/Tyr)	-6	HACD1m (0.00e+00, 9.19e-03); 2OXOADOXm (0.00e+00, 9.19e-03)
atp	ATP	ATP/ADP	Purine Synthesis	Nucleotide metabolism	9.65138e-11	PRAGSr (6.71e-03, 6.71e-03); PRFGS (6.71e-03, 6.71e-03); r0666 (6.71e-03, 6.71e-03); PRASCS (6.71e-03, 6.71e-03)
dhlam	dihydrolipoamide	Dihydrolipoamide	Glycolysis/Gluconeogenesis	Central Energy Metabolism	-0.692469	GCC2cm (5.76e-01, 9.31e-01)
inost	myo-inositol	Myo-inositol	Extracellular Transport	Extracellular Transport	2.36583e-11	INSTt2 (6.22e-04, 6.22e-04)
hco3	Bicarbonate	HCO3	Transport, Endoplasmic Reticulum	Transport, Endoplasmic Reticulum	0.838556	HUMANGEM_MAR06107 (3.31e-02, 1.85e-02)
nadh	Nicotinamide adenine dinucleotide - reduced	NAD(+)	Biosynthesis Of Amino Acids	Biosynthesis Of Amino Acids	-0.0384955	PGCD (5.29e-01, 8.83e-01); ICDHxm (3.32e-01, 0.00e+00)
pser__L	O-Phospho-L-serine	O-Phospho-L-serine	Biosynthesis Of Amino Acids	Biosynthesis Of Amino Acids	-0.740843	PSERT (5.29e-01, 8.83e-01)
gar	N1-(5-Phospho-D-ribosyl)glycinamide	N1-(5-Phospho-D-ribosyl)glycinamide	Purine Synthesis	Nucleotide metabolism	9.65128e-11	PRAGSr (6.71e-03, 6.71e-03); GARFT (6.71e-03, 6.71e-03)
coa	Coenzyme A	CoA	Propanoate Metabolism	Propanoate Metabolism	0.47411	SUCOASm (9.26e-01, 5.70e-01); MMSAD3m (0.00e+00, 9.67e-02)
h2o	Water	H2O	Oxidative Phosphorylation	Oxidative Phosphorylation	-0.0619633	ATPS4m (1.15e+01, 1.20e+01); CYOOm3 (3.56e+00, 3.77e+00); PPAm (3.93e-01, 3.93e-01)
mlthf	5,10-Methylenetetrahydrofolate	CH2-THF	Glyoxylate And Dicarboxylate Metabolism	Glyoxylate And Dicarboxylate Metabolism	-0.740843	GHMT2rm (5.29e-01, 8.83e-01)
pyr	pyruvate	Pyr	Biosynthesis Of Amino Acids	Biosynthesis Of Amino Acids	0.0946349	PYK (9.41e+00, 9.06e+00); PCm (3.32e-01, 9.67e-02); ALATA__L (3.11e-02, 0.00e+00)
accoa	Acetyl-CoA	Acetyl-CoA	Citric Acid Cycle	Central Energy Metabolism	6	CSm (3.32e-01, 0.00e+00)
fum	Fumarate	Fumarate	Nucleotide Metabolism	Nucleotide metabolism	1.29607e-10	ADSL1 (4.61e-03, 4.61e-03)
pep	Phosphoenolpyruvate	Phosphoenolpyruvate	Glycolysis/Gluconeogenesis	Central Energy Metabolism	0.0554195	PYK (9.41e+00, 9.06e+00); ENO (9.41e+00, 9.06e+00)
h2o	Water	H2O	Valine, Leucine And Isoleucine Degradation	BCAA metabolism (Val/Leu/Iso)	-3.31636e-11	ECOAH9m (3.20e-02, 3.20e-02); ECOAH12m (1.53e-02, 1.53e-02); 3HBCOAHLm (1.53e-02, 1.53e-02); HMGCOASim (9.19e-03, 9.19e-03)
uri	Uridine	Uridine	Nucleotide Metabolism	Nucleotide metabolism	-1.85856e-11	PYNP2r (2.32e-02, 2.32e-02); NTD2 (7.85e-03, 7.85e-03)
aacoa	Acetoacetyl-CoA	Acetoacetyl-CoA	Tryptophan Metabolism	AAA metabolism (Trp/Phe/Tyr)	-3.219e-11	HACD1m (0.00e+00, 9.19e-03); ACACT1r (9.19e-03, 9.19e-03); ACACT1rm (9.19e-03, 0.00e+00)
ppcoa	Propanoyl-CoA	Propanoyl-CoA	Propanoate Metabolism	Propanoate Metabolism	-2.84467e-11	PPCOACm (4.73e-02, 4.73e-02)
coa	Coenzyme A	CoA	Pyruvate Metabolism	Central Energy Metabolism	1	ACACT1r (9.19e-03, 9.19e-03); ACACT1rm (9.19e-03, 0.00e+00)
utp	UTP	UTP	Pyrimidine Synthesis	Nucleotide metabolism	-1.19744e-11	CTPS2 (1.84e-02, 1.84e-02)
for	Formate	Formate	Folate Metabolism	Folate Metabolism	9.65144e-11	FTHFL (1.34e-02, 1.34e-02)
glu__L	L-glutamate(1-)	L-Glu	Beta-alanine Metabolism	Beta-alanine Metabolism	-6	APAT2rm (0.00e+00, 9.67e-02)
betald	betaine aldehyde	Betaine aldehyde	Folate Metabolism	Folate Metabolism	-0.0308489	r0552 (1.26e+00, 1.28e+00); r0553 (1.26e+00, 1.28e+00)
hmgcoa	Hydroxymethylglutaryl-CoA	HMG-CoA	Terpenoid Backbone Biosynthesis	Terpenoid Backbone Biosynthesis	-2.3267e-11	HMGCOASim (9.19e-03, 9.19e-03)
cbp	Carbamoyl phosphate	Carbamoyl phosphate	Biosynthesis Of Amino Acids	Biosynthesis Of Amino Acids	-3.91896e-11	r0034 (5.22e-03, 5.22e-03)
pi	hydrogenphosphate	HPO4	Nucleotide Interconversion	Nucleotide metabolism	2.76231e-12	NTD8 (2.44e-02, 2.44e-02); DURIPP (2.32e-02, 2.32e-02); ADSS (4.61e-03, 4.61e-03); PUNP1 (1.20e-03, 1.20e-03); NTD7 (1.20e-03, 1.20e-03); NTD9m (5.02e-04, 5.02e-04)
val__L	L-valine	L-Val	Extracellular Transport	Extracellular Transport	2.0598e-13	VALtec (5.00e-02, 5.00e-02); r1402 (8.78e-04, 8.78e-04)
dcamp	N6-(1,2-Dicarboxyethyl)-AMP	N6-(1,2-Dicarboxyethyl)-AMP	Nucleotide Metabolism	Nucleotide metabolism	1.29607e-10	ADSS (4.61e-03, 4.61e-03); ADSL1 (4.61e-03, 4.61e-03)
asp__L	L-aspartate(1-)	L-aspartate(1-)	Pyrimidine Metabolism	Nucleotide metabolism	-3.91896e-11	ASPCTr (5.22e-03, 5.22e-03)
co2	carbon dioxide	CO2	Sphingolipid Metabolism	Lipid metabolism	2.36422e-11	SERPT (7.31e-04, 7.31e-04)
glyc3p	Glycerol 3-phosphate	Glycerol 3-phosphate	Triacylglycerol Synthesis	Lipid metabolism	-1.43166e-11	GPAM_hs (1.73e-02, 1.73e-02)
3php	3-phosphonatooxypyruvate(3-)	3-PHP	Biosynthesis Of Amino Acids	Biosynthesis Of Amino Acids	-0.740843	PSERT (5.29e-01, 8.83e-01); PGCD (5.29e-01, 8.83e-01)
pi	hydrogenphosphate	HPO4	Nitrogen Metabolism	Nitrogen disposal	-3.91896e-11	r0034 (5.22e-03, 5.22e-03)
dcmp	dCMP	dCMP	Pyrimidine Catabolism	Nucleotide metabolism	2.36531e-11	DCMPDA (8.62e-04, 8.62e-04)
h	proton	H	Tryptophan Metabolism	AAA metabolism (Trp/Phe/Tyr)	-0.752662	KYN3OX (1.34e-02, 1.34e-02); FKYNH (1.34e-02, 1.34e-02); HACD1m (0.00e+00, 9.19e-03); r0541 (0.00e+00, 9.19e-03)
coa	Coenzyme A	CoA	Fatty Acid Biosynthesis	Lipid metabolism	-2.32668e-11	FAS140COA (1.84e-02, 1.84e-02); FAS100COA (1.84e-02, 1.84e-02); FAS120COA (1.84e-02, 1.84e-02); FAS80COA__L (1.84e-02, 1.84e-02); FAS160COA (1.84e-02, 1.84e-02)
2oxoadp	2-oxoadipate(2-)	Adipates	Lysine Biosynthesis	Lysine Biosynthesis	-6	r0450 (0.00e+00, 9.19e-03)
h	proton	H	Biosynthesis Of Amino Acids	Biosynthesis Of Amino Acids	0.0788568	PYK (9.41e+00, 9.06e+00); PGCD (5.29e-01, 8.83e-01); CSm (3.32e-01, 0.00e+00); PCm (3.32e-01, 9.67e-02); PRPPS (3.68e-02, 3.68e-02); r0034 (5.22e-03, 5.22e-03)
3php	3-phosphonatooxypyruvate(3-)	3-PHP	Methane Metabolism	Methane Metabolism	-0.740843	PSERT (5.29e-01, 8.83e-01); PGCD (5.29e-01, 8.83e-01)
oaa	Oxaloacetate	Oxaloacetate	Arginine Biosynthesis	AA other (Cys/Met/Lys/Arg/Pro)	-1.59712	ASPTAm (0.00e+00, 9.67e-02); ASPTA (4.77e-02, 4.77e-02)
atp	ATP	ATP/ADP	Biosynthesis Of Amino Acids	Biosynthesis Of Amino Acids	0.0437722	PGK (9.94e+00, 9.94e+00); PYK (9.41e+00, 9.06e+00); PCm (3.32e-01, 9.67e-02); PRPPS (3.68e-02, 3.68e-02); r0034 (5.22e-03, 5.22e-03)
pa_hs	phosphatidate(2-)	PhosphatidAte(2-)	Triacylglycerol Synthesis	Lipid metabolism	-1.4316e-11	AGPAT1 (1.73e-02, 1.73e-02)
h	proton	H	Methane Metabolism	Methane Metabolism	-0.983058	PGCD (5.29e-01, 8.83e-01); MDH (1.68e-01, 4.94e-01)
gly	Glycine	Glycine	Glyoxylate And Dicarboxylate Metabolism	Glyoxylate And Dicarboxylate Metabolism	-0.740843	GHMT2rm (5.29e-01, 8.83e-01)
nad	Nicotinamide adenine dinucleotide	NAD(+)	Nitrogen Metabolism	Nitrogen disposal	-6	GLUDxm (0.00e+00, 3.30e-01)
glu__L	L-glutamate(1-)	L-Glu	Lysine Biosynthesis	Lysine Biosynthesis	-6	r0450 (0.00e+00, 9.19e-03)
pser__L	O-Phospho-L-serine	O-Phospho-L-serine	Transport, Mitochondrial	Mitochondrial transport	-0.740843	PSERtm (5.29e-01, 8.83e-01)
3pg	3-Phospho-D-glycerate	3-PG	Alanine, Aspartate And Glutamate Metabolism	AA central (A/D/E,G/S/T)	-0.740843	PGCD (5.29e-01, 8.83e-01)
coa	Coenzyme A	CoA	Beta-alanine Metabolism	Beta-alanine Metabolism	-6	MMSAD3m (0.00e+00, 9.67e-02)
hco3	Bicarbonate	HCO3	Valine, Leucine And Isoleucine Biosynthesis	BCAA metabolism (Val/Leu/Iso)	-2.84467e-11	PPCOACm (4.73e-02, 4.73e-02)
accoa	Acetyl-CoA	Acetyl-CoA	2-oxocarboxylic Acid Metabolism	2-oxocarboxylic Acid Metabolism	6	PDHm (4.47e-01, 0.00e+00); CSm (3.32e-01, 0.00e+00)
nadph	Nicotinamide adenine dinucleotide phosphate - reduced	NADP(+)	Pyruvate Metabolism	Central Energy Metabolism	3.13604	ME2m (7.69e-01, 8.75e-02)
pyr	pyruvate	Pyr	Transport, Mitochondrial	Mitochondrial transport	-2.3267e-11	r1464 (9.19e-03, 9.19e-03)
pchol_hs	Phosphatidylcholine	Phosphatidylcholine	Extracellular Transport	Extracellular Transport	-1.27703e-11	PCt (9.00e-03, 9.00e-03)
akg	2-Oxoglutarate	Î±-KG	Citric Acid Cycle	Central Energy Metabolism	1.2116	AKGDm (8.78e-01, 5.22e-01); ICDHxm (3.32e-01, 0.00e+00)
q10h2	Ubiquinol-10	Ubiquinol-10	Glycerophospholipid Metabolism	Lipid metabolism	-6	r0205 (0.00e+00, 9.77e-01)
nadh	Nicotinamide adenine dinucleotide - reduced	NAD(+)	Valine, Leucine And Isoleucine Biosynthesis	BCAA metabolism (Val/Leu/Iso)	-3.46172e-11	HACD9m (3.20e-02, 3.20e-02); HIBDm (1.53e-02, 1.53e-02); MMSAD1m (1.53e-02, 1.53e-02)
pi	hydrogenphosphate	HPO4	Folate Metabolism	Folate Metabolism	9.65144e-11	FTHFL (1.34e-02, 1.34e-02)
succoa	Succinyl-CoA	Succinyl-CoA	Propanoate Metabolism	Propanoate Metabolism	0.657051	SUCOASm (9.26e-01, 5.70e-01); MMMm (4.73e-02, 4.73e-02)
h2o	Water	H2O	Fatty Acid Metabolism	Lipid metabolism	-6	ECOAH1m (0.00e+00, 9.19e-03)
pro__L	L-proline	L-Pro	Biomass And Maintenance Functions	Biomass And Maintenance Functions	2.36426e-11	BIOMASS_maintenance (3.42e-02, 3.42e-02)
malcoa	Malonyl-CoA	Malonyl-CoA	Transport, Mitochondrial	Mitochondrial transport	-2.32668e-11	MALCOAtm (1.29e-01, 1.29e-01)
pe_hs	Phosphatidylethanolamine (gallus gallus)	Phosphatidylethanolamine (gallus gallus)	Glycerophospholipid Metabolism	Lipid metabolism	-1.68351e-10	PSDm_hs (1.71e-03, 1.71e-03)
cbp	Carbamoyl phosphate	Carbamoyl phosphate	Transport, Mitochondrial	Mitochondrial transport	-3.91896e-11	HUMANGEM_MAR08651 (5.22e-03, 5.22e-03)
glyb	glycine betaine	Glycine betaine	Alanine, Aspartate And Glutamate Metabolism	AA central (A/D/E,G/S/T)	-0.0251411	r0552m (2.79e+00, 2.84e+00); r0553m (2.79e+00, 2.84e+00); r0552 (1.26e+00, 1.28e+00); r0553 (1.26e+00, 1.28e+00)
alpam	S-aminomethyldihydrolipoamide	S-aminomethyldihydrolipoamide	Glycine, Serine And Threonine Metabolism	AA central (A/D/E,G/S/T)	-0.740843	GCC2am (5.29e-01, 8.83e-01); GCC2bim (5.29e-01, 8.83e-01)
3hbcoa	(S)-3-hydroxybutanoyl-CoA(4-)	SC acyl-CoA	Tryptophan Metabolism	AAA metabolism (Trp/Phe/Tyr)	-6	HACD1m (0.00e+00, 9.19e-03); ECOAH1m (0.00e+00, 9.19e-03)
nadph	Nicotinamide adenine dinucleotide phosphate - reduced	NADP(+)	Fatty Acid Biosynthesis	Lipid metabolism	-2.32666e-11	FAS140COA (1.84e-02, 1.84e-02); FAS100COA (1.84e-02, 1.84e-02); FAS80COA__L (1.84e-02, 1.84e-02); FAS120COA (1.84e-02, 1.84e-02); FAS160COA (1.84e-02, 1.84e-02)
akg	2-Oxoglutarate	Î±-KG	Lysine Metabolism	AA other (Cys/Met/Lys/Arg/Pro)	-6	r0450 (0.00e+00, 9.19e-03); SACCD3m (0.00e+00, 9.19e-03)
mlthf	5,10-Methylenetetrahydrofolate	CH2-THF	Glycine, Serine And Threonine Metabolism	AA central (A/D/E,G/S/T)	-0.740843	GCC2bim (5.29e-01, 8.83e-01); GHMT2rm (5.29e-01, 8.83e-01)
trdox	Oxidized thioredoxin	Oxidized thioredoxin	Nucleotide Interconversion	Nucleotide metabolism	-1.28081e-11	RNDR2 (2.53e-02, 2.53e-02); r0475 (2.29e-02, 2.29e-02); TRDR (4.12e-03, 4.12e-03); RNDR3 (1.72e-03, 1.72e-03)
r1p	alpha-D-Ribose 1-phosphate	Alpha-D-Ribose 1-phosphate	Purine Catabolism	Purine Catabolism	3.50047e-10	PUNP3 (5.02e-04, 5.02e-04)
2mb2coa	2-methylcrotonoyl-CoA(4-)	2-Methylcrotonoyl-CoA(4-)	Valine, Leucine And Isoleucine Degradation	BCAA metabolism (Val/Leu/Iso)	-1.63798e-11	ECOAH9m (3.20e-02, 3.20e-02)
akg	2-Oxoglutarate	Î±-KG	Valine, Leucine And Isoleucine Degradation	BCAA metabolism (Val/Leu/Iso)	-2.84466e-11	ILETA (3.20e-02, 3.20e-02); VALTA (1.53e-02, 1.53e-02)
nad	Nicotinamide adenine dinucleotide	NAD(+)	Folate Metabolism	Folate Metabolism	-0.399023	MTHFD2m (1.06e+00, 1.77e+00); r0552 (1.26e+00, 1.28e+00)
akg	2-Oxoglutarate	Î±-KG	Phenylalanine Metabolism	AAA metabolism (Trp/Phe/Tyr)	0.000241835	PHETA1 (1.10e+01, 1.10e+01); PHETA1m (1.10e+01, 1.10e+01)
prpp	5-Phospho-alpha-D-ribose 1-diphosphate	5-Phospho-alpha-D-ribose 1-diphosphate	Alanine, Aspartate And Glutamate Metabolism	AA central (A/D/E,G/S/T)	9.65141e-11	GLUPRT (6.71e-03, 6.71e-03)
h2o2	Hydrogen peroxide	Hydrogen peroxide	Pseudoreactions	Pseudoreactions	-0.0804183	EX_h2o2_e (7.12e-02, 7.53e-02)
accoa	Acetyl-CoA	Acetyl-CoA	Fatty Acid Metabolism	Lipid metabolism	0.0931094	ACCOACm (1.29e-01, 1.29e-01); ACACT1r (9.19e-03, 9.19e-03); ACACT1rm (9.19e-03, 0.00e+00)
nadh	Nicotinamide adenine dinucleotide - reduced	NAD(+)	Taurine And Hypotaurine Metabolism	Taurine And Hypotaurine Metabolism	-6	GLUDxm (0.00e+00, 3.30e-01)
amp	AMP	AMP	Extracellular Transport	Extracellular Transport	2.36567e-11	r1402 (8.78e-04, 8.78e-04)
ade	Adenine	Adenine	Purine Catabolism	Purine Catabolism	2.35465e-11	PUNP2 (1.20e-03, 1.20e-03)
dhdascb	dehydroascorbide(1-)	Dehydroascorbide(1-)	Ascorbate And Aldarate Metabolism	Ascorbate And Aldarate Metabolism	-0.0804183	DASCBR (3.56e-02, 3.77e-02)
6pgl	6-phospho-D-glucono-1,5-lactone	6-Phospho-D-glucono-1,5-lactone	Pentose Phosphate Pathway	Redox & Pentose Metabolism	3.71447e-11	G6PDH2r (1.19e-02, 1.19e-02); PGL (1.19e-02, 1.19e-02)
coa	Coenzyme A	CoA	Sphingolipid Metabolism	Lipid metabolism	2.36419e-11	SERPT (7.31e-04, 7.31e-04); DSAT (7.31e-04, 7.31e-04)
dgtp	dGTP	dGTP	Nucleotide Interconversion	Nucleotide metabolism	2.36435e-11	NDPK5 (8.62e-04, 8.62e-04)
h2o	Water	H2O	Arginine Biosynthesis	AA other (Cys/Met/Lys/Arg/Pro)	-0.78918	GLUNm (4.48e-01, 4.48e-01); GLUDxm (0.00e+00, 3.30e-01); r0034 (5.22e-03, 5.22e-03)
ppi	Diphosphate	PPi	Nucleotide Interconversion	Nucleotide metabolism	2.36551e-11	DUTPDPm (1.20e-03, 1.20e-03)
dhor_S	(S)-dihydroorotate	(S)-dihydroorotate	Pyrimidine Synthesis	Nucleotide metabolism	-3.91896e-11	DHORTS (5.22e-03, 5.22e-03)
h	proton	H	Valine, Leucine And Isoleucine Biosynthesis	BCAA metabolism (Val/Leu/Iso)	-3.09038e-11	PPCOACm (4.73e-02, 4.73e-02); r0670 (3.20e-02, 3.20e-02); HACD9m (3.20e-02, 3.20e-02); r0385 (1.53e-02, 1.53e-02); HIBDm (1.53e-02, 1.53e-02); 3HBCOAHLm (1.53e-02, 1.53e-02)
ile__L	L-isoleucine	L-isoleucine	Valine, Leucine And Isoleucine Degradation	BCAA metabolism (Val/Leu/Iso)	-1.63801e-11	ILETA (3.20e-02, 3.20e-02)
akg	2-Oxoglutarate	Î±-KG	2-oxocarboxylic Acid Metabolism	2-oxocarboxylic Acid Metabolism	0.0385217	PHETA1 (1.10e+01, 1.10e+01); PHETA1m (1.10e+01, 1.10e+01); AKGDm (8.78e-01, 5.22e-01); ICDHxm (3.32e-01, 0.00e+00); ASPTAm (0.00e+00, 9.67e-02); ASPTA (4.77e-02, 4.77e-02); ILETA (3.20e-02, 3.20e-02); ALATA__L (3.11e-02, 0.00e+00); VALTA (1.53e-02, 1.53e-02); r0450 (0.00e+00, 9.19e-03)
ps_hs	phosphatidylserine	Phosphatidylserine	Biomass And Maintenance Functions	Biomass And Maintenance Functions	2.36426e-11	BIOMASS_maintenance (3.42e-02, 3.42e-02)
h	proton	H	Terpenoid Backbone Biosynthesis	Terpenoid Backbone Biosynthesis	-2.3267e-11	HMGCOASim (9.19e-03, 9.19e-03)
crm_hs	N-acylsphingosine	N-acylsphingosine	Sphingolipid Metabolism	Lipid metabolism	2.36419e-11	SMS (7.31e-04, 7.31e-04); RE2675C (7.31e-04, 7.31e-04)
thf	5,6,7,8-Tetrahydrofolate	THF	Purine Metabolism	Nitrogen disposal	9.65138e-11	GARFT (6.71e-03, 6.71e-03); AICART (6.71e-03, 6.71e-03)
3mob	3-methyl-2-oxobutanoate	Î±-Ketoisovalerate	Transport, Mitochondrial	Mitochondrial transport	-5.3703e-11	3MOBt2im (1.53e-02, 1.53e-02)
atp	ATP	ATP/ADP	Valine, Leucine And Isoleucine Biosynthesis	BCAA metabolism (Val/Leu/Iso)	-2.84467e-11	PPCOACm (4.73e-02, 4.73e-02)
prpp	5-Phospho-alpha-D-ribose 1-diphosphate	5-Phospho-alpha-D-ribose 1-diphosphate	Purine Synthesis	Nucleotide metabolism	9.65141e-11	GLUPRT (6.71e-03, 6.71e-03)
adp	ADP	ATP/ADP	Nucleotide Interconversion	Nucleotide metabolism	1.19715e-11	ADK1 (3.75e-01, 3.75e-01); GK1 (2.65e-02, 2.65e-02); DGK1 (2.44e-02, 2.44e-02); URIDK2 (2.41e-02, 2.41e-02); DURIK1 (2.32e-02, 2.32e-02); CYTDK1 (7.52e-03, 7.52e-03); NDPK1 (5.85e-03, 5.85e-03); NDPK8 (2.39e-03, 2.39e-03); NDPK3m (2.13e-03, 2.13e-03); CYTK1 (1.72e-03, 1.72e-03); NDPK10 (1.20e-03, 1.20e-03); NDPK10n (1.20e-03, 1.20e-03); DADNK (1.20e-03, 1.20e-03); NDPK6m (1.20e-03, 1.20e-03); NDP…
2maacoa	2-methylacetoacetyl-CoA(4-)	2-Methylacetoacetyl-CoA(4-)	Valine, Leucine And Isoleucine Degradation	BCAA metabolism (Val/Leu/Iso)	-1.63801e-11	HACD9m (3.20e-02, 3.20e-02); ACACT10m (3.20e-02, 3.20e-02)
co2	carbon dioxide	CO2	Nitrogen Metabolism	Nitrogen disposal	-0.0582991	r1418c (2.37e+00, 2.73e+00); r1418m (5.07e-01, 2.73e-01); r1418 (3.41e-02, 2.44e-02); r0034 (5.22e-03, 5.22e-03)
fprica	5-Formamido-1-(5-phospho-D-ribosyl)imidazole-4-carboxamide	5-Formamido-1-(5-phospho-D-ribosyl)imidAzole-4-carboxamide	Folate Metabolism	Folate Metabolism	9.65144e-11	AICART (6.71e-03, 6.71e-03)
b2coa	crotonoyl-CoA(4-)	SC acyl-CoA	Tryptophan Metabolism	AAA metabolism (Trp/Phe/Tyr)	-6	ECOAH1m (0.00e+00, 9.19e-03); r0541 (0.00e+00, 9.19e-03)
adp	ADP	ATP/ADP	Nitrogen Metabolism	Nitrogen disposal	-3.91896e-11	r0034 (5.22e-03, 5.22e-03)
g6p	D-Glucose 6-phosphate	D-Glucose 6-phosphate	Starch And Sucrose Metabolism	Starch And Sucrose Metabolism	3.2675e-14	HEX1 (5.00e+00, 5.00e+00)
btn	Biotin	Biotin	Extracellular Transport	Extracellular Transport	-6.01994	BTNt4i (4.75e-03, 3.08e-01); BTNt2 (4.75e-03, 3.08e-01)
gly	Glycine	Glycine	Glycine, Serine And Threonine Metabolism	AA central (A/D/E,G/S/T)	-0.740843	GCC2am (5.29e-01, 8.83e-01); GHMT2rm (5.29e-01, 8.83e-01)
trdrd	Reduced thioredoxin	Reduced thioredoxin	Nucleotide Interconversion	Nucleotide metabolism	-1.28079e-11	RNDR2 (2.53e-02, 2.53e-02); r0475 (2.29e-02, 2.29e-02); TRDR (4.12e-03, 4.12e-03); RNDR3 (1.72e-03, 1.72e-03)
pi	hydrogenphosphate	HPO4	Glycolysis/Gluconeogenesis	Central Energy Metabolism	-6.77525e-14	GAPD (9.94e+00, 9.94e+00)
amp	AMP	AMP	Alanine, Aspartate And Glutamate Metabolism	AA central (A/D/E,G/S/T)	1.29607e-10	ADSL1 (4.61e-03, 4.61e-03)
h	proton	H	Taurine And Hypotaurine Metabolism	Taurine And Hypotaurine Metabolism	-6	GLUDxm (0.00e+00, 3.30e-01)
duri	Deoxyuridine	Deoxyuridine	Nucleotide Interconversion	Nucleotide metabolism	-1.87493e-11	DURIK1 (2.32e-02, 2.32e-02); DURIPP (2.32e-02, 2.32e-02)
bilglcur	mono(glucosyluronic acid)bilirubin(2-)	Mono(glucosyluronic acid)bilirubin(2-)	Transport, Endoplasmic Reticulum	Transport, Endoplasmic Reticulum	0.838556	HUMANGEM_MAR06107 (3.31e-02, 1.85e-02); BILGLCURtr (3.31e-02, 1.85e-02)
3pg	3-Phospho-D-glycerate	3-PG	Biosynthesis Of Amino Acids	Biosynthesis Of Amino Acids	-6.80728e-14	PGK (9.94e+00, 9.94e+00); PGM (9.41e+00, 9.06e+00); PGCD (5.29e-01, 8.83e-01)
cdp	CDP	CDP	Nucleotide Interconversion	Nucleotide metabolism	2.36512e-11	UMPK2m (2.63e-03, 2.63e-03); NDPK3m (2.13e-03, 2.13e-03); CYTK1 (1.72e-03, 1.72e-03); RNDR3 (1.72e-03, 1.72e-03); CYTK1m (5.02e-04, 5.02e-04)
nadh	Nicotinamide adenine dinucleotide - reduced	NAD(+)	Inositol Phosphate Metabolism	Inositol Phosphate Metabolism	-6	MMSAD3m (0.00e+00, 9.67e-02)
orot	Orotate	Orotate	Pyrimidine Metabolism	Nucleotide metabolism	-3.91896e-11	ORPT (5.22e-03, 5.22e-03)
chsterol	cholesterol	Cholesterol	Extracellular Transport	Extracellular Transport	-7.8878e-12	CHOLESTle (9.00e-03, 9.00e-03); CHOLESTTDe (6.97e-04, 6.97e-04)
imp	IMP	IMP	Alanine, Aspartate And Glutamate Metabolism	AA central (A/D/E,G/S/T)	1.29607e-10	ADSS (4.61e-03, 4.61e-03)
nadph	Nicotinamide adenine dinucleotide phosphate - reduced	NADP(+)	Sphingolipid Metabolism	Lipid metabolism	2.36422e-11	3DSPHR (7.31e-04, 7.31e-04)
dhlam	dihydrolipoamide	Dihydrolipoamide	Glycine, Serine And Threonine Metabolism	AA central (A/D/E,G/S/T)	-0.740843	GCC2bim (5.29e-01, 8.83e-01)
val__L	L-valine	L-Val	Biosynthesis Of Amino Acids	Biosynthesis Of Amino Acids	-5.37022e-11	VALTA (1.53e-02, 1.53e-02)
glu__L	L-glutamate(1-)	L-Glu	Nitrogen Metabolism	Nitrogen disposal	-6	GLUDxm (0.00e+00, 3.30e-01)
h2o	Water	H2O	Urea Cycle	Nitrogen disposal	-3.91896e-11	r0034 (5.22e-03, 5.22e-03)
nad	Nicotinamide adenine dinucleotide	NAD(+)	Oxidative Phosphorylation	Oxidative Phosphorylation	0.0530349	NADH2_u10m (6.15e+00, 5.92e+00)
co2	carbon dioxide	CO2	Folate Metabolism	Folate Metabolism	-0.741499	FTHFDHm (1.06e+00, 1.77e+00)
nad	Nicotinamide adenine dinucleotide	NAD(+)	Valine, Leucine And Isoleucine Degradation	BCAA metabolism (Val/Leu/Iso)	-2.84466e-11	HACD9m (3.20e-02, 3.20e-02); MMSAD1m (1.53e-02, 1.53e-02)
adp	ADP	ATP/ADP	Folate Metabolism	Folate Metabolism	9.65144e-11	FTHFL (1.34e-02, 1.34e-02)
dgsn	Deoxyguanosine	Deoxyguanosine	Purine Catabolism	Purine Catabolism	-1.66729e-11	PUNP4 (2.44e-02, 2.44e-02)
ggn	primed glycogenin (glycogenin-8[1,4-Glc])	Primed glycogenin (glycogenin-8[1,4-Glc])	Starch And Sucrose Metabolism	Starch And Sucrose Metabolism	2.36567e-11	GLGNS1 (8.78e-04, 8.78e-04)
dudp	dUDP	dUDP	Transport, Mitochondrial	Mitochondrial transport	2.36422e-11	DNDPt14m (1.20e-03, 1.20e-03)
pram	5-Phospho-beta-D-ribosylamine	5-Phospho-beta-D-ribosylamine	Purine Metabolism	Nitrogen disposal	9.65135e-11	PRAGSr (6.71e-03, 6.71e-03); GLUPRT (6.71e-03, 6.71e-03)
h	proton	H	Pyrimidine Metabolism	Nucleotide metabolism	-2.1441e-11	CTPS2 (1.84e-02, 1.84e-02); CYTDK1 (7.52e-03, 7.52e-03); OMPDC (5.22e-03, 5.22e-03); ASPCTr (5.22e-03, 5.22e-03)
3mop	3-methyl-2-oxopentanoate	3-Methyl-2-oxopentanoate	Valine, Leucine And Isoleucine Biosynthesis	BCAA metabolism (Val/Leu/Iso)	-1.63804e-11	r0670 (3.20e-02, 3.20e-02); ILETA (3.20e-02, 3.20e-02)
prpp	5-Phospho-alpha-D-ribose 1-diphosphate	5-Phospho-alpha-D-ribose 1-diphosphate	Biosynthesis Of Amino Acids	Biosynthesis Of Amino Acids	5.75592e-12	PRPPS (3.68e-02, 3.68e-02)
atp	ATP	ATP/ADP	Pyrimidine Metabolism	Nucleotide metabolism	-1.10299e-11	URIDK2 (2.41e-02, 2.41e-02); CTPS2 (1.84e-02, 1.84e-02); CYTDK1 (7.52e-03, 7.52e-03); NDPK3m (2.13e-03, 2.13e-03); CYTK1 (1.72e-03, 1.72e-03); NDPK6m (1.20e-03, 1.20e-03); NDPK4n (1.20e-03, 1.20e-03); CYTK1m (5.02e-04, 5.02e-04)
acac	acetoacetate	Acetoacetate	Transport, Mitochondrial	Mitochondrial transport	-2.3267e-11	r1464 (9.19e-03, 9.19e-03)
imp	IMP	IMP	Purine Synthesis	Nucleotide metabolism	9.65151e-11	IMPC (6.71e-03, 6.71e-03)
h	proton	H	Starch And Sucrose Metabolism	Starch And Sucrose Metabolism	3.65191e-14	HEX1 (5.00e+00, 5.00e+00); GLGNS1 (8.78e-04, 8.78e-04)
h2o	Water	H2O	Alanine, Aspartate And Glutamate Metabolism	AA central (A/D/E,G/S/T)	-0.167168	r0553m (2.79e+00, 2.84e+00); r0552m (2.79e+00, 2.84e+00); r0552 (1.26e+00, 1.28e+00); r0553 (1.26e+00, 1.28e+00); PSP__Lm (5.29e-01, 8.83e-01); GHMT2rm (5.29e-01, 8.83e-01); GLUNm (4.48e-01, 4.48e-01); GLUDxm (0.00e+00, 3.30e-01); GLUPRT (6.71e-03, 6.71e-03); r0034 (5.22e-03, 5.22e-03)
o2	O2	O2	Pseudoreactions	Pseudoreactions	-0.0798175	EX_o2_e (3.59e+00, 3.79e+00)
mmcoa_R	(R)-methylmalonyl-CoA(5-)	(R)-methylmalonyl-CoA(5-)	Valine, Leucine And Isoleucine Degradation	BCAA metabolism (Val/Leu/Iso)	-3.19225e-11	MMMm (4.73e-02, 4.73e-02); MMEm (4.73e-02, 4.73e-02)
pchol_hs	Phosphatidylcholine	Phosphatidylcholine	Biomass And Maintenance Functions	Biomass And Maintenance Functions	2.36426e-11	BIOMASS_maintenance (3.42e-02, 3.42e-02)
Rtotal2coa	R total 2 coenzyme A	R total 2 coenzyme A	Fatty Acid Biosynthesis	Lipid metabolism	-1.43166e-11	ARTPLM2 (1.73e-02, 1.73e-02)
atp	ATP	ATP/ADP	Starch And Sucrose Metabolism	Starch And Sucrose Metabolism	3.2675e-14	HEX1 (5.00e+00, 5.00e+00)
akg	2-Oxoglutarate	Î±-KG	Arginine Biosynthesis	AA other (Cys/Met/Lys/Arg/Pro)	-2.58856	GLUDxm (0.00e+00, 3.30e-01); ASPTAm (0.00e+00, 9.67e-02); ASPTA (4.77e-02, 4.77e-02); ALATA__L (3.11e-02, 0.00e+00)
nadp	Nicotinamide adenine dinucleotide phosphate	NADP(+)	Lysine Metabolism	AA other (Cys/Met/Lys/Arg/Pro)	-6	SACCD3m (0.00e+00, 9.19e-03)
dcmp	dCMP	dCMP	Nucleotide Interconversion	Nucleotide metabolism	2.36422e-11	CYTK12 (8.62e-04, 8.62e-04)
Rtotal	R total	R total	Glycerophospholipid Metabolism	Lipid metabolism	-1.27703e-11	LPASE (9.00e-03, 9.00e-03)
na1	Sodium	Sodium	Extracellular Transport	Extracellular Transport	-0.18702	2HCO3_NAt (1.20e+00, 1.38e+00); GLNtN1 (4.00e-01, 4.90e-01); GLNt4 (7.60e-02, 0.00e+00); GLUt4 (5.98e-02, 5.00e-02); PIt9 (5.38e-02, 5.38e-02); SERt4 (4.50e-02, 4.50e-02); ALAtN1 (0.00e+00, 3.11e-02); THRt4 (3.11e-02, 3.11e-02); PROt4 (2.32e-02, 2.32e-02); ARGATB0tc (0.00e+00, 1.99e-02); NKCCt (0.00e+00, 1.99e-02); ASNtN1 (1.70e-02, 0.00e+00); ASNt4 (0.00e+00, 1.70e-02); GLYt4 (0.00e+00, 1.46e-02…
nadh	Nicotinamide adenine dinucleotide - reduced	NAD(+)	Butanoate Metabolism	Butanoate Metabolism	-6	HACD1m (0.00e+00, 9.19e-03)
h	proton	H	Pentose And Glucuronate Interconversions	Redox & Pentose Metabolism	-3.86367e-11	GALU (2.63e-03, 2.63e-03)
gthrd	Reduced glutathione	Reduced glutathione	Glutathione Metabolism	Redox & Pentose Metabolism	1.21128	r0129 (3.31e-02, 1.85e-02); r0130 (9.76e-03, 0.00e+00)
h2o	Water	H2O	Purine Synthesis	Nucleotide metabolism	9.65138e-11	PRFGS (6.71e-03, 6.71e-03); GLUPRT (6.71e-03, 6.71e-03); IMPC (6.71e-03, 6.71e-03)
his__L	L-histidine	L-histidine	Extracellular Transport	Extracellular Transport	2.36519e-11	HIStN1 (1.22e-02, 1.22e-02); r1402 (8.78e-04, 8.78e-04)
oaa	Oxaloacetate	Oxaloacetate	Methane Metabolism	Methane Metabolism	-1.55488	MDH (1.68e-01, 4.94e-01)
aacoa	Acetoacetyl-CoA	Acetoacetyl-CoA	Butanoate Metabolism	Butanoate Metabolism	-2.77284e-11	HMGCOASim (9.19e-03, 9.19e-03); AACOAT (9.19e-03, 9.19e-03); HACD1m (0.00e+00, 9.19e-03); ACACT1r (9.19e-03, 9.19e-03); ACACT1rm (9.19e-03, 0.00e+00)
ppi	Diphosphate	PPi	Oxidative Phosphorylation	Oxidative Phosphorylation	1.71201e-11	PPAm (3.93e-01, 3.93e-01)
amp	AMP	AMP	Biosynthesis Of Amino Acids	Biosynthesis Of Amino Acids	5.75592e-12	PRPPS (3.68e-02, 3.68e-02)
damp	dAMP(2-)	dAMP(2-)	Nucleotide Interconversion	Nucleotide metabolism	2.36426e-11	DADNK (1.20e-03, 1.20e-03); ADKd (1.20e-03, 1.20e-03)
val__L	L-valine	L-Val	Valine, Leucine And Isoleucine Biosynthesis	BCAA metabolism (Val/Leu/Iso)	-5.37022e-11	VALTA (1.53e-02, 1.53e-02)
co2	carbon dioxide	CO2	Glycolysis/Gluconeogenesis	Central Energy Metabolism	6	PDHm (4.47e-01, 0.00e+00)
nad	Nicotinamide adenine dinucleotide	NAD(+)	Fatty Acid Metabolism	Lipid metabolism	-6	HACD1m (0.00e+00, 9.19e-03)
ppi	Diphosphate	PPi	Valine, Leucine And Isoleucine Degradation	BCAA metabolism (Val/Leu/Iso)	-2.32666e-11	AACOAT (9.19e-03, 9.19e-03)
adp	ADP	ATP/ADP	Glycolysis/Gluconeogenesis	Central Energy Metabolism	0.017556	PGK (9.94e+00, 9.94e+00); PYK (9.41e+00, 9.06e+00); HEX1 (5.00e+00, 5.00e+00); PFK (4.98e+00, 4.98e+00)
ala__L	L-alanine	L-Ala	2-oxocarboxylic Acid Metabolism	2-oxocarboxylic Acid Metabolism	6	ALATA__L (3.11e-02, 0.00e+00)
adp	ADP	ATP/ADP	Oxidative Phosphorylation	Oxidative Phosphorylation	-0.0582893	ATPS4m (1.15e+01, 1.20e+01)
cbasp	N-Carbamoyl-L-aspartate	N-Carbamoyl-L-aspartate	Pyrimidine Synthesis	Nucleotide metabolism	-3.91896e-11	DHORTS (5.22e-03, 5.22e-03); ASPCTr (5.22e-03, 5.22e-03)
adp	ADP	ATP/ADP	Valine, Leucine And Isoleucine Degradation	BCAA metabolism (Val/Leu/Iso)	-2.84467e-11	PPCOACm (4.73e-02, 4.73e-02)
h	proton	H	Butanoate Metabolism	Butanoate Metabolism	-1	HMGCOASim (9.19e-03, 9.19e-03); HACD1m (0.00e+00, 9.19e-03)
ibcoa	isobutyryl-CoA(4-)	Isobutyryl-CoA(4-)	Valine, Leucine And Isoleucine Biosynthesis	BCAA metabolism (Val/Leu/Iso)	-5.37021e-11	r0561 (1.53e-02, 1.53e-02); r0560 (1.53e-02, 1.53e-02)
2oxoadp	2-oxoadipate(2-)	Adipates	Lysine Metabolism	AA other (Cys/Met/Lys/Arg/Pro)	-6	r0450 (0.00e+00, 9.19e-03); 2OXOADOXm (0.00e+00, 9.19e-03)
atp	ATP	ATP/ADP	Butanoate Metabolism	Butanoate Metabolism	-2.32666e-11	AACOAT (9.19e-03, 9.19e-03)
3hmp	3-hydroxy-2-methylpropanoate	3-Hydroxy-2-methylpropanoate	Valine, Leucine And Isoleucine Degradation	BCAA metabolism (Val/Leu/Iso)	-5.37022e-11	3HBCOAHLm (1.53e-02, 1.53e-02)
air	5-amino-1-(5-phospho-D-ribosyl)imidazole	5-Amino-1-(5-phospho-D-ribosyl)imidAzole	Purine Metabolism	Nitrogen disposal	9.65157e-11	AIRCr (6.71e-03, 6.71e-03)
L2aadp	L-2-aminoadipate(1-)	Adipates	Biosynthesis Of Amino Acids	Biosynthesis Of Amino Acids	-6	r0450 (0.00e+00, 9.19e-03)
pi	hydrogenphosphate	HPO4	Pseudoreactions	Pseudoreactions	-1.73983e-11	EX_pi_e (5.38e-02, 5.38e-02)
met__L	L-methionine	L-Met	Pseudoreactions	Pseudoreactions	2.36519e-11	EX_met__L_e (1.07e-02, 1.07e-02)
mal__L	(S)-malate(2-)	(S)-malate(2-)	Glyoxylate And Dicarboxylate Metabolism	Glyoxylate And Dicarboxylate Metabolism	-1.55488	MDH (1.68e-01, 4.94e-01)
dtmp	dTMP	dTMP	Nucleotide Interconversion	Nucleotide metabolism	2.36419e-11	TMDSm (1.20e-03, 1.20e-03)
dcdp	dCDP	dCDP	Nucleotide Interconversion	Nucleotide metabolism	2.36422e-11	RNDR3 (1.72e-03, 1.72e-03); CYTK12 (8.62e-04, 8.62e-04)
akg	2-Oxoglutarate	Î±-KG	Alanine, Aspartate And Glutamate Metabolism	AA central (A/D/E,G/S/T)	-1.16011	PSERT (5.29e-01, 8.83e-01); GLUDxm (0.00e+00, 3.30e-01); ASPTAm (0.00e+00, 9.67e-02); ASPTA (4.77e-02, 4.77e-02); ALATA__L (3.11e-02, 0.00e+00)
akg	2-Oxoglutarate	Î±-KG	Phenylalanine, Tyrosine And Tryptophan Biosynthesis	AAA metabolism (Trp/Phe/Tyr)	0.000241835	PHETA1 (1.10e+01, 1.10e+01); PHETA1m (1.10e+01, 1.10e+01)
h2o	Water	H2O	Tryptophan Metabolism	AAA metabolism (Trp/Phe/Tyr)	-0.296662	r0647 (1.34e-02, 1.34e-02); FKYNH (1.34e-02, 1.34e-02); KYN3OX (1.34e-02, 1.34e-02); ECOAH1m (0.00e+00, 9.19e-03)
nad	Nicotinamide adenine dinucleotide	NAD(+)	Arginine Biosynthesis	AA other (Cys/Met/Lys/Arg/Pro)	-6	GLUDxm (0.00e+00, 3.30e-01)
hmgcoa	Hydroxymethylglutaryl-CoA	HMG-CoA	Valine, Leucine And Isoleucine Degradation	BCAA metabolism (Val/Leu/Iso)	-2.32673e-11	HMGCOASim (9.19e-03, 9.19e-03); HMGLm (9.19e-03, 9.19e-03)
accoa	Acetyl-CoA	Acetyl-CoA	Synthesis And Degradation Of Ketone Bodies	Lipid metabolism	-2.3267e-11	HMGCOASim (9.19e-03, 9.19e-03)
sphgn	sphinganine(1+)	Sphinganine(1+)	Sphingolipid Metabolism	Lipid metabolism	2.36419e-11	3DSPHR (7.31e-04, 7.31e-04); DSAT (7.31e-04, 7.31e-04)
25aics	(S)-2-[5-Amino-1-(5-phospho-D-ribosyl)imidazole-4-carboxamido]succinate	(S)-2-[5-Amino-1-(5-phospho-D-ribosyl)imidAzole-4-carboxamido]succinate	Purine Synthesis	Nucleotide metabolism	9.65154e-11	PRASCS (6.71e-03, 6.71e-03); ADSL2 (6.71e-03, 6.71e-03)
h2o	Water	H2O	Biosynthesis Of Amino Acids	Biosynthesis Of Amino Acids	0.0472941	ENO (9.41e+00, 9.06e+00); GHMT2rm (5.29e-01, 8.83e-01); CSm (3.32e-01, 0.00e+00); r0034 (5.22e-03, 5.22e-03)
glu__L	L-glutamate(1-)	L-Glu	Valine, Leucine And Isoleucine Degradation	BCAA metabolism (Val/Leu/Iso)	-2.84466e-11	ILETA (3.20e-02, 3.20e-02); VALTA (1.53e-02, 1.53e-02)
glu__L	L-glutamate(1-)	L-Glu	Phenylalanine Metabolism	AAA metabolism (Trp/Phe/Tyr)	0.000241835	PHETA1m (1.10e+01, 1.10e+01); PHETA1 (1.10e+01, 1.10e+01)
nadph	Nicotinamide adenine dinucleotide phosphate - reduced	NADP(+)	Pentose Phosphate Pathway	Redox & Pentose Metabolism	3.71447e-11	G6PDH2r (1.19e-02, 1.19e-02); GND (1.19e-02, 1.19e-02)
chsterol	cholesterol	Cholesterol	Biomass And Maintenance Functions	Biomass And Maintenance Functions	2.36426e-11	BIOMASS_maintenance (3.42e-02, 3.42e-02)
gdp	GDP	GDP	Alanine, Aspartate And Glutamate Metabolism	AA central (A/D/E,G/S/T)	1.29607e-10	ADSS (4.61e-03, 4.61e-03)
nadph	Nicotinamide adenine dinucleotide phosphate - reduced	NADP(+)	Folate Metabolism	Folate Metabolism	-0.398843	FTHFDHm (1.06e+00, 1.77e+00); r0553 (1.26e+00, 1.28e+00); r0226 (1.20e-03, 1.20e-03)
h2o	Water	H2O	Methane Metabolism	Methane Metabolism	-6.77525e-14	ENO (9.41e+00, 9.06e+00); GHMT2rm (5.29e-01, 8.83e-01)
hco3	Bicarbonate	HCO3	Citric Acid Cycle	Central Energy Metabolism	1.77825	PCm (3.32e-01, 9.67e-02)
nh4	Ammonium	NH4	Extracellular Transport	Extracellular Transport	-0.036879	NH4t (9.70e-01, 9.95e-01)
3mob	3-methyl-2-oxobutanoate	Î±-Ketoisovalerate	Pantothenate And Coa Biosynthesis	Pantothenate And Coa Biosynthesis	-5.37022e-11	VALTA (1.53e-02, 1.53e-02)
2oxoadp	2-oxoadipate(2-)	Adipates	2-oxocarboxylic Acid Metabolism	2-oxocarboxylic Acid Metabolism	-6	r0450 (0.00e+00, 9.19e-03); 2OXOADOXm (0.00e+00, 9.19e-03)
co2	carbon dioxide	CO2	Glycerophospholipid Metabolism	Lipid metabolism	-1.68351e-10	PSDm_hs (1.71e-03, 1.71e-03)
gly	Glycine	Glycine	Biomass And Maintenance Functions	Biomass And Maintenance Functions	2.36426e-11	BIOMASS_maintenance (3.42e-02, 3.42e-02)
accoa	Acetyl-CoA	Acetyl-CoA	Tryptophan Metabolism	AAA metabolism (Trp/Phe/Tyr)	1	ACACT1r (9.19e-03, 9.19e-03); ACACT1rm (9.19e-03, 0.00e+00)
pep	Phosphoenolpyruvate	Phosphoenolpyruvate	Methane Metabolism	Methane Metabolism	0.0554195	ENO (9.41e+00, 9.06e+00)
q10	ubiquinone-10	Ubiquinone-10	Transport, Mitochondrial	Mitochondrial transport	-3.91896e-11	DHORD9 (5.22e-03, 5.22e-03)
ump	UMP	UMP	Pyrimidine Catabolism	Nucleotide metabolism	-1.81128e-11	NTD2 (7.85e-03, 7.85e-03)
3hbcoa	(S)-3-hydroxybutanoyl-CoA(4-)	SC acyl-CoA	Butanoate Metabolism	Butanoate Metabolism	-6	HACD1m (0.00e+00, 9.19e-03); ECOAH1m (0.00e+00, 9.19e-03)
nadh	Nicotinamide adenine dinucleotide - reduced	NAD(+)	Citric Acid Cycle	Central Energy Metabolism	0.439581	AKGDm (8.78e-01, 5.22e-01); MDH (1.68e-01, 4.94e-01); ICDHxm (3.32e-01, 0.00e+00)
imp	IMP	IMP	Transport, Mitochondrial	Mitochondrial transport	-0.0368328	HUMANGEM_MAR20145 (9.71e-01, 9.96e-01)
accoa	Acetyl-CoA	Acetyl-CoA	Biosynthesis Of Amino Acids	Biosynthesis Of Amino Acids	6	CSm (3.32e-01, 0.00e+00)
phe__L	L-phenylalanine	L-Phe	2-oxocarboxylic Acid Metabolism	2-oxocarboxylic Acid Metabolism	0.000241835	PHETA1 (1.10e+01, 1.10e+01); PHETA1m (1.10e+01, 1.10e+01)
pi	hydrogenphosphate	HPO4	Urea Cycle	Nitrogen disposal	-3.91896e-11	r0034 (5.22e-03, 5.22e-03)
udp	UDP	UDP	Transport, Mitochondrial	Mitochondrial transport	2.36573e-11	HUMANGEM_MAR20147 (2.63e-03, 2.63e-03)
thf	5,6,7,8-Tetrahydrofolate	THF	Glyoxylate And Dicarboxylate Metabolism	Glyoxylate And Dicarboxylate Metabolism	-0.740843	GHMT2rm (5.29e-01, 8.83e-01)
coa	Coenzyme A	CoA	Glycolysis/Gluconeogenesis	Central Energy Metabolism	6	PDHm (4.47e-01, 0.00e+00)
pe_hs	Phosphatidylethanolamine (gallus gallus)	Phosphatidylethanolamine (gallus gallus)	Transport, Endoplasmic Reticulum	Transport, Endoplasmic Reticulum	-1.68367e-10	PE_HSter (1.71e-03, 1.71e-03)
cdpdag_hs	CDP-diacylglycerol(2-)	CDP-diacylglycerol(2-)	Transport, Mitochondrial	Mitochondrial transport	2.36573e-11	HUMANGEM_MAR00120 (5.02e-04, 5.02e-04)
dump	dUMP	DUMP	Pyrimidine Catabolism	Nucleotide metabolism	2.36531e-11	DCMPDA (8.62e-04, 8.62e-04)
hco3	Bicarbonate	HCO3	Valine, Leucine And Isoleucine Degradation	BCAA metabolism (Val/Leu/Iso)	-2.84467e-11	PPCOACm (4.73e-02, 4.73e-02)
ala__L	L-alanine	L-Ala	Arginine Biosynthesis	AA other (Cys/Met/Lys/Arg/Pro)	6	ALATA__L (3.11e-02, 0.00e+00)
adp	ADP	ATP/ADP	Fatty Acid Metabolism	Lipid metabolism	-2.32668e-11	ACCOACm (1.29e-01, 1.29e-01)
cbp	Carbamoyl phosphate	Carbamoyl phosphate	Pyrimidine Synthesis	Nucleotide metabolism	-3.91896e-11	ASPCTr (5.22e-03, 5.22e-03)
coa	Coenzyme A	CoA	Valine, Leucine And Isoleucine Degradation	BCAA metabolism (Val/Leu/Iso)	0.14005	ACACT10m (3.20e-02, 3.20e-02); 3HBCOAHLm (1.53e-02, 1.53e-02); MMSAD1m (1.53e-02, 1.53e-02); HMGCOASim (9.19e-03, 9.19e-03); AACOAT (9.19e-03, 9.19e-03); ACACT1r (9.19e-03, 9.19e-03); ACACT1rm (9.19e-03, 0.00e+00)
fum	Fumarate	Fumarate	Pyruvate Metabolism	Central Energy Metabolism	0.689357	FUMm (9.26e-01, 5.70e-01); FUM (1.13e-02, 1.13e-02)
thr__L	L-Threonine	L-Thr	Pseudoreactions	Pseudoreactions	2.36525e-11	EX_thr__L_e (3.11e-02, 3.11e-02)
nh4	Ammonium	NH4	Alanine, Aspartate And Glutamate Metabolism	AA central (A/D/E,G/S/T)	-0.763345	GCC2bim (5.29e-01, 8.83e-01); GLUNm (4.48e-01, 4.48e-01); GLUDxm (0.00e+00, 3.30e-01); r0034 (5.22e-03, 5.22e-03)
ppcoa	Propanoyl-CoA	Propanoyl-CoA	Valine, Leucine And Isoleucine Degradation	BCAA metabolism (Val/Leu/Iso)	-2.84464e-11	PPCOACm (4.73e-02, 4.73e-02); ACACT10m (3.20e-02, 3.20e-02); MMSAD1m (1.53e-02, 1.53e-02)
leu__L	L-leucine	L-leucine	Pseudoreactions	Pseudoreactions	2.36522e-11	EX_leu__L_e (5.00e-02, 5.00e-02)
asp__L	L-aspartate(1-)	L-aspartate(1-)	Arginine Biosynthesis	AA other (Cys/Met/Lys/Arg/Pro)	-1.59712	ASPTAm (0.00e+00, 9.67e-02); ASPTA (4.77e-02, 4.77e-02)
dag_hs	diglyceride	Diglyceride	Triacylglycerol Synthesis	Lipid metabolism	2.36583e-11	DGAT (3.70e-04, 3.70e-04)
acac	acetoacetate	Acetoacetate	Butanoate Metabolism	Butanoate Metabolism	-2.3267e-11	HMGLm (9.19e-03, 9.19e-03); AACOAT (9.19e-03, 9.19e-03)
3hmbcoa	(2S,3S)-3-hydroxy-2-methylbutanoyl-CoA(4-)	(2S,3S)-3-hydroxy-2-methylbutanoyl-CoA(4-)	Valine, Leucine And Isoleucine Degradation	BCAA metabolism (Val/Leu/Iso)	-1.63801e-11	HACD9m (3.20e-02, 3.20e-02); ECOAH9m (3.20e-02, 3.20e-02)
ser__L	L-serine	L-ser	Extracellular Transport	Extracellular Transport	1.64339e-11	SERt4 (4.50e-02, 4.50e-02); r1402 (8.78e-04, 8.78e-04)
r1p	alpha-D-Ribose 1-phosphate	Alpha-D-Ribose 1-phosphate	Nucleotide Interconversion	Nucleotide metabolism	2.35423e-11	PUNP1 (1.20e-03, 1.20e-03)
lys__L	L-lysinium(1+)	Lys	Lysine Metabolism	AA other (Cys/Met/Lys/Arg/Pro)	-6	SACCD3m (0.00e+00, 9.19e-03)
dgdp	dGDP	dGDP	Nucleotide Interconversion	Nucleotide metabolism	-1.52954e-11	RNDR2 (2.53e-02, 2.53e-02); DGK1 (2.44e-02, 2.44e-02); NDPK5 (8.62e-04, 8.62e-04)
uri	Uridine	Uridine	Pyrimidine Catabolism	Nucleotide metabolism	-1.87457e-11	PYNP2r (2.32e-02, 2.32e-02); CYTDe (1.54e-02, 1.54e-02); NTD2 (7.85e-03, 7.85e-03)
h	proton	H	Citric Acid Cycle	Central Energy Metabolism	0.493766	MDH (1.68e-01, 4.94e-01); CSm (3.32e-01, 0.00e+00); PCm (3.32e-01, 9.67e-02)
b2coa	crotonoyl-CoA(4-)	SC acyl-CoA	Butanoate Metabolism	Butanoate Metabolism	-6	ECOAH1m (0.00e+00, 9.19e-03)
nad	Nicotinamide adenine dinucleotide	NAD(+)	Alanine, Aspartate And Glutamate Metabolism	AA central (A/D/E,G/S/T)	-0.220343	r0552m (2.79e+00, 2.84e+00); r0552 (1.26e+00, 1.28e+00); PGCD (5.29e-01, 8.83e-01); GLUDxm (0.00e+00, 3.30e-01)
nadh	Nicotinamide adenine dinucleotide - reduced	NAD(+)	Glyoxylate And Dicarboxylate Metabolism	Glyoxylate And Dicarboxylate Metabolism	-1.55488	MDH (1.68e-01, 4.94e-01)
atp	ATP	ATP/ADP	Citric Acid Cycle	Central Energy Metabolism	0.915802	SUCOASm (9.26e-01, 5.70e-01); PCm (3.32e-01, 9.67e-02)
h2o	Water	H2O	Valine, Leucine And Isoleucine Biosynthesis	BCAA metabolism (Val/Leu/Iso)	-3.46169e-11	ECOAH9m (3.20e-02, 3.20e-02); ECOAH12m (1.53e-02, 1.53e-02); 3HBCOAHLm (1.53e-02, 1.53e-02)
ala__L	L-alanine	L-Ala	Extracellular Transport	Extracellular Transport	-6.16702	ALAtN1 (0.00e+00, 3.11e-02); r1402 (8.78e-04, 8.78e-04)
akg	2-Oxoglutarate	Î±-KG	Tryptophan Metabolism	AAA metabolism (Trp/Phe/Tyr)	9.65144e-11	3HKYNAKGAT (1.34e-02, 1.34e-02)
adp	ADP	ATP/ADP	Arginine Biosynthesis	AA other (Cys/Met/Lys/Arg/Pro)	-3.91896e-11	r0034 (5.22e-03, 5.22e-03)
h2o	Water	H2O	Terpenoid Backbone Biosynthesis	Terpenoid Backbone Biosynthesis	-2.3267e-11	HMGCOASim (9.19e-03, 9.19e-03)
ade	Adenine	Adenine	Nucleotide Interconversion	Nucleotide metabolism	2.35423e-11	PUNP1 (1.20e-03, 1.20e-03)
ump	UMP	UMP	Transport, Mitochondrial	Mitochondrial transport	2.3657e-11	HUMANGEM_MAR20148 (2.63e-03, 2.63e-03)
co2	carbon dioxide	CO2	Pseudoreactions	Pseudoreactions	0.990417	EX_co2_e (1.37e+00, 6.88e-01)
akg	2-Oxoglutarate	Î±-KG	Biosynthesis Of Amino Acids	Biosynthesis Of Amino Acids	-0.00589265	PHETA1 (1.10e+01, 1.10e+01); PHETA1m (1.10e+01, 1.10e+01); PSERT (5.29e-01, 8.83e-01); ICDHxm (3.32e-01, 0.00e+00); ASPTAm (0.00e+00, 9.67e-02); ASPTA (4.77e-02, 4.77e-02); ILETA (3.20e-02, 3.20e-02); ALATA__L (3.11e-02, 0.00e+00); VALTA (1.53e-02, 1.53e-02); r0450 (0.00e+00, 9.19e-03)
udpg	UDPglucose	UDPglucose	Starch And Sucrose Metabolism	Starch And Sucrose Metabolism	2.36567e-11	GLGNS1 (8.78e-04, 8.78e-04)
ctp	CTP	CTP	Nucleotide Interconversion	Nucleotide metabolism	2.3657e-11	UMPK2m (2.63e-03, 2.63e-03); NDPK3m (2.13e-03, 2.13e-03)
gly	Glycine	Glycine	Cyanoamino Acid Metabolism	Cyanoamino Acid Metabolism	-0.740843	GHMT2rm (5.29e-01, 8.83e-01)
nad	Nicotinamide adenine dinucleotide	NAD(+)	Cysteine And Methionine Metabolism	AA other (Cys/Met/Lys/Arg/Pro)	-0.740843	PGCD (5.29e-01, 8.83e-01)
fgam	N2-Formyl-N1-(5-phospho-D-ribosyl)glycinamide	N2-Formyl-N1-(5-phospho-D-ribosyl)glycinamide	Purine Synthesis	Nucleotide metabolism	9.65128e-11	GARFT (6.71e-03, 6.71e-03); PRFGS (6.71e-03, 6.71e-03)
asp__L	L-aspartate(1-)	L-aspartate(1-)	Extracellular Transport	Extracellular Transport	2.36567e-11	r1402 (8.78e-04, 8.78e-04)
h	proton	H	Lysine Metabolism	AA other (Cys/Met/Lys/Arg/Pro)	-6	r0525 (0.00e+00, 9.19e-03); r0594m (0.00e+00, 9.19e-03); SACCD3m (0.00e+00, 9.19e-03)
aacoa	Acetoacetyl-CoA	Acetoacetyl-CoA	Glyoxylate And Dicarboxylate Metabolism	Glyoxylate And Dicarboxylate Metabolism	1	ACACT1r (9.19e-03, 9.19e-03); ACACT1rm (9.19e-03, 0.00e+00)
dgmp	dGMP	dGMP	Nucleotide Interconversion	Nucleotide metabolism	-1.66695e-11	DGK1 (2.44e-02, 2.44e-02); NTD8 (2.44e-02, 2.44e-02)
cys__L	L-cysteine	L-Cys	Extracellular Transport	Extracellular Transport	1.29453	CYSGLUexR (2.42e-02, 9.61e-03); r1402 (8.78e-04, 8.78e-04)
arg__L	L-argininium(1+)	Arg	Extracellular Transport	Extracellular Transport	2.36503e-11	ARGLYSex (1.99e-02, 0.00e+00); ARGATB0tc (0.00e+00, 1.99e-02); r1402 (8.78e-04, 8.78e-04)
nadp	Nicotinamide adenine dinucleotide phosphate	NADP(+)	Alanine, Aspartate And Glutamate Metabolism	AA central (A/D/E,G/S/T)	-0.0251411	r0553m (2.79e+00, 2.84e+00); r0553 (1.26e+00, 1.28e+00)
h2o	Water	H2O	Taurine And Hypotaurine Metabolism	Taurine And Hypotaurine Metabolism	-6	GLUDxm (0.00e+00, 3.30e-01)
hco3	Bicarbonate	HCO3	Fatty Acid Metabolism	Lipid metabolism	-2.32668e-11	ACCOACm (1.29e-01, 1.29e-01)
glu__L	L-glutamate(1-)	L-Glu	Arginine Biosynthesis	AA other (Cys/Met/Lys/Arg/Pro)	-0.808052	GLUNm (4.48e-01, 4.48e-01); GLUDxm (0.00e+00, 3.30e-01); ASPTAm (0.00e+00, 9.67e-02); ASPTA (4.77e-02, 4.77e-02); ALATA__L (3.11e-02, 0.00e+00)
ser__L	L-serine	L-ser	Alanine, Aspartate And Glutamate Metabolism	AA central (A/D/E,G/S/T)	-0.740843	PSP__Lm (5.29e-01, 8.83e-01); GHMT2rm (5.29e-01, 8.83e-01)
2mp2coa	2-Methylprop-2-enoyl-CoA	2-Methylprop-2-enoyl-CoA	Valine, Leucine And Isoleucine Degradation	BCAA metabolism (Val/Leu/Iso)	-5.37022e-11	ECOAH12m (1.53e-02, 1.53e-02)
r1p	alpha-D-Ribose 1-phosphate	Alpha-D-Ribose 1-phosphate	Pentose Phosphate Pathway	Redox & Pentose Metabolism	-9.27632e-12	PPM (2.49e-02, 2.49e-02)
dgmp	dGMP	dGMP	Purine Metabolism	Nitrogen disposal	-1.66684e-11	NTD8 (2.44e-02, 2.44e-02)
coa	Coenzyme A	CoA	Fatty Acid Metabolism	Lipid metabolism	1	ACACT1r (9.19e-03, 9.19e-03); ACACT1rm (9.19e-03, 0.00e+00)
ile__L	L-isoleucine	L-isoleucine	Biosynthesis Of Amino Acids	Biosynthesis Of Amino Acids	-1.63801e-11	ILETA (3.20e-02, 3.20e-02)
succoa	Succinyl-CoA	Succinyl-CoA	Valine, Leucine And Isoleucine Degradation	BCAA metabolism (Val/Leu/Iso)	-3.19226e-11	MMMm (4.73e-02, 4.73e-02)
udpg	UDPglucose	UDPglucose	Pentose And Glucuronate Interconversions	Redox & Pentose Metabolism	-3.86367e-11	GALU (2.63e-03, 2.63e-03)
dtdp	dTDP	dTDP	Transport, Nuclear	Transport, Nuclear	2.36422e-11	DTDPtn (1.20e-03, 1.20e-03)
thf	5,6,7,8-Tetrahydrofolate	THF	Glycine, Serine And Threonine Metabolism	AA central (A/D/E,G/S/T)	-0.740843	GCC2bim (5.29e-01, 8.83e-01); GHMT2rm (5.29e-01, 8.83e-01)
udp	UDP	UDP	Starch And Sucrose Metabolism	Starch And Sucrose Metabolism	2.36567e-11	GLGNS1 (8.78e-04, 8.78e-04)
ala__L	L-alanine	L-Ala	Alanine, Aspartate And Glutamate Metabolism	AA central (A/D/E,G/S/T)	6	ALATA__L (3.11e-02, 0.00e+00)
lpchol_hs	lysophosphatidylcholine	Lysophosphatidylcholine	Glycerophospholipid Metabolism	Lipid metabolism	-1.27703e-11	LPASE (9.00e-03, 9.00e-03)
h	proton	H	Glyoxylate And Dicarboxylate Metabolism	Glyoxylate And Dicarboxylate Metabolism	0.0158713	MDH (1.68e-01, 4.94e-01); CSm (3.32e-01, 0.00e+00); PPCOACm (4.73e-02, 4.73e-02)
co2	carbon dioxide	CO2	Urea Cycle	Nitrogen disposal	-3.91896e-11	r0034 (5.22e-03, 5.22e-03)
h	proton	H	2-oxocarboxylic Acid Metabolism	2-oxocarboxylic Acid Metabolism	6	CSm (3.32e-01, 0.00e+00)
atp	ATP	ATP/ADP	Glyoxylate And Dicarboxylate Metabolism	Glyoxylate And Dicarboxylate Metabolism	-2.84467e-11	PPCOACm (4.73e-02, 4.73e-02)
adp	ADP	ATP/ADP	Urea Cycle	Nitrogen disposal	-3.91896e-11	r0034 (5.22e-03, 5.22e-03)
dtdp	dTDP	dTDP	Nucleotide Interconversion	Nucleotide metabolism	2.36426e-11	NDPK4n (1.20e-03, 1.20e-03)
mlthf	5,10-Methylenetetrahydrofolate	CH2-THF	Nucleotide Interconversion	Nucleotide metabolism	2.36419e-11	TMDSm (1.20e-03, 1.20e-03)
dhap	Dihydroxyacetone phosphate	DHAP	Pentose Phosphate Pathway	Redox & Pentose Metabolism	-8.05662e-14	FBA (4.98e+00, 4.98e+00)
nadp	Nicotinamide adenine dinucleotide phosphate	NADP(+)	Lysine Degradation	AA other (Cys/Met/Lys/Arg/Pro)	-6	SACCD3m (0.00e+00, 9.19e-03)
asp__L	L-aspartate(1-)	L-aspartate(1-)	Alanine, Aspartate And Glutamate Metabolism	AA central (A/D/E,G/S/T)	-1.42193	ASPTAm (0.00e+00, 9.67e-02); ASPTA (4.77e-02, 4.77e-02); ASPCTr (5.22e-03, 5.22e-03); ADSS (4.61e-03, 4.61e-03)
imp	IMP	IMP	Purine Metabolism	Nitrogen disposal	-0.0366608	r0276 (9.71e-01, 9.96e-01); GMPR (9.69e-01, 9.94e-01); IMPC (6.71e-03, 6.71e-03); ADSS (4.61e-03, 4.61e-03)
h2o	Water	H2O	Pyrimidine Metabolism	Nucleotide metabolism	-1.38092e-11	CTPS2 (1.84e-02, 1.84e-02); NTD2 (7.85e-03, 7.85e-03)
phe__L	L-phenylalanine	L-Phe	Extracellular Transport	Extracellular Transport	2.37345e-11	PHEtec (3.92e-02, 3.92e-02); TYRPHELAT2tc (1.59e-02, 1.59e-02); r1402 (8.78e-04, 8.78e-04)
akg	2-Oxoglutarate	Î±-KG	Transport, Mitochondrial	Mitochondrial transport	0.0455173	AKGMALtm (1.05e+01, 1.02e+01)
nh4	Ammonium	NH4	Pyrimidine Catabolism	Nucleotide metabolism	-1.67981e-11	CYTDe (1.54e-02, 1.54e-02); DCMPDA (8.62e-04, 8.62e-04)
nh4	Ammonium	NH4	Biosynthesis Of Amino Acids	Biosynthesis Of Amino Acids	-3.91896e-11	r0034 (5.22e-03, 5.22e-03)
fprica	5-Formamido-1-(5-phospho-D-ribosyl)imidazole-4-carboxamide	5-Formamido-1-(5-phospho-D-ribosyl)imidAzole-4-carboxamide	Purine Synthesis	Nucleotide metabolism	9.65148e-11	AICART (6.71e-03, 6.71e-03); IMPC (6.71e-03, 6.71e-03)
dgsn	Deoxyguanosine	Deoxyguanosine	Nucleotide Interconversion	Nucleotide metabolism	-1.66684e-11	NTD8 (2.44e-02, 2.44e-02)
saccrp__L	L-saccharopinate(1-)	L-saccharopinate(1-)	Lysine Metabolism	AA other (Cys/Met/Lys/Arg/Pro)	-6	r0525 (0.00e+00, 9.19e-03); SACCD3m (0.00e+00, 9.19e-03)
gln__L	L-glutamine	L-Gln	Pseudoreactions	Pseudoreactions	0	EX_gln__L_e (5.00e-01, 5.00e-01)
pi	hydrogenphosphate	HPO4	Transport, Endoplasmic Reticulum	Transport, Endoplasmic Reticulum	-3.91896e-11	PIter (5.22e-03, 5.22e-03)
3mop	3-methyl-2-oxopentanoate	3-Methyl-2-oxopentanoate	Valine, Leucine And Isoleucine Degradation	BCAA metabolism (Val/Leu/Iso)	-1.63801e-11	ILETA (3.20e-02, 3.20e-02)
2mb2coa	2-methylcrotonoyl-CoA(4-)	2-Methylcrotonoyl-CoA(4-)	Valine, Leucine And Isoleucine Biosynthesis	BCAA metabolism (Val/Leu/Iso)	-1.63804e-11	r0603 (3.20e-02, 3.20e-02); ECOAH9m (3.20e-02, 3.20e-02)
Rtotalcoa	R total Coenzyme A	R total Coenzyme A	Triacylglycerol Synthesis	Lipid metabolism	-1.43166e-11	GPAM_hs (1.73e-02, 1.73e-02)
nad	Nicotinamide adenine dinucleotide	NAD(+)	Tryptophan Metabolism	AAA metabolism (Trp/Phe/Tyr)	-6	HACD1m (0.00e+00, 9.19e-03); 2OXOADOXm (0.00e+00, 9.19e-03)
glc__D	D-glucose	Glc	Extracellular Transport	Extracellular Transport	3.2675e-14	GLCt1 (5.00e+00, 5.00e+00)
nadh	Nicotinamide adenine dinucleotide - reduced	NAD(+)	Glycine, Serine And Threonine Metabolism	AA central (A/D/E,G/S/T)	-0.128322	r0552m (2.79e+00, 2.84e+00); r0552 (1.26e+00, 1.28e+00); PGCD (5.29e-01, 8.83e-01)
pser__L	O-Phospho-L-serine	O-Phospho-L-serine	Glycine, Serine And Threonine Metabolism	AA central (A/D/E,G/S/T)	-0.740843	PSP__Lm (5.29e-01, 8.83e-01); PSERT (5.29e-01, 8.83e-01)
C02470	Xanthurenic acid	Xanthurenic acid	Pseudoreactions	Pseudoreactions	9.65141e-11	EX_C02470_e (1.34e-02, 1.34e-02)
gtp	GTP	GTP	Nucleotide Interconversion	Nucleotide metabolism	1.17105e-10	NDPK1 (5.85e-03, 5.85e-03); ADSS (4.61e-03, 4.61e-03)
nad	Nicotinamide adenine dinucleotide	NAD(+)	Biosynthesis Of Amino Acids	Biosynthesis Of Amino Acids	-0.0384955	PGCD (5.29e-01, 8.83e-01); ICDHxm (3.32e-01, 0.00e+00)
amp	AMP	AMP	Butanoate Metabolism	Butanoate Metabolism	-2.32666e-11	AACOAT (9.19e-03, 9.19e-03)
asp__L	L-aspartate(1-)	L-aspartate(1-)	Purine Synthesis	Nucleotide metabolism	9.65154e-11	PRASCS (6.71e-03, 6.71e-03)
dutp	dUTP	DUTP	Nucleotide Interconversion	Nucleotide metabolism	-1.72336e-11	r0475 (2.29e-02, 2.29e-02); r0531 (2.29e-02, 2.29e-02); NDPK6m (1.20e-03, 1.20e-03); DUTPDPm (1.20e-03, 1.20e-03)
Rtotal3coa	R total 3 Coenzyme A	R total 3 Coenzyme A	Fatty Acid Biosynthesis	Lipid metabolism	2.36586e-11	ARTPLM3 (3.70e-04, 3.70e-04)
dgdp	dGDP	dGDP	Nucleotide Metabolism	Nucleotide metabolism	2.36435e-11	NDPK5 (8.62e-04, 8.62e-04)
ps_hs	phosphatidylserine	Phosphatidylserine	Glycerophospholipid Metabolism	Lipid metabolism	-1.41157e-10	PSSA1_hs (2.27e-03, 2.27e-03); PSDm_hs (1.71e-03, 1.71e-03)
nad	Nicotinamide adenine dinucleotide	NAD(+)	Methane Metabolism	Methane Metabolism	-0.983058	PGCD (5.29e-01, 8.83e-01); MDH (1.68e-01, 4.94e-01)
ppi	Diphosphate	PPi	Purine Synthesis	Nucleotide metabolism	9.65141e-11	GLUPRT (6.71e-03, 6.71e-03)
mlthf	5,10-Methylenetetrahydrofolate	CH2-THF	Folate Metabolism	Folate Metabolism	-0.74128	MTHFD2m (1.06e+00, 1.77e+00); GHMT2rm (5.29e-01, 8.83e-01)
hco3	Bicarbonate	HCO3	Extracellular Transport	Extracellular Transport	-0.196428	2HCO3_NAt (1.20e+00, 1.38e+00)
inost	myo-inositol	Myo-inositol	Glycerophospholipid Metabolism	Lipid metabolism	2.36557e-11	CDIPTr (6.22e-04, 6.22e-04)
g3p	Glyceraldehyde 3-phosphate	G3P	Glycolysis/Gluconeogenesis	Central Energy Metabolism	-6.3588e-14	GAPD (9.94e+00, 9.94e+00); TPI (4.97e+00, 4.97e+00)
phe__L	L-phenylalanine	L-Phe	Phenylalanine, Tyrosine And Tryptophan Biosynthesis	AAA metabolism (Trp/Phe/Tyr)	0.000241835	PHETA1 (1.10e+01, 1.10e+01); PHETA1m (1.10e+01, 1.10e+01)
accoa	Acetyl-CoA	Acetyl-CoA	Inositol Phosphate Metabolism	Inositol Phosphate Metabolism	-6	MMSAD3m (0.00e+00, 9.67e-02)
ump	UMP	UMP	Nucleotide Interconversion	Nucleotide metabolism	2.3657e-11	UMPK2m (2.63e-03, 2.63e-03)
ade	Adenine	Adenine	Nucleotide Metabolism	Nucleotide metabolism	2.35445e-11	PUNP2 (1.20e-03, 1.20e-03); PUNP1 (1.20e-03, 1.20e-03)
3mop	3-methyl-2-oxopentanoate	3-Methyl-2-oxopentanoate	2-oxocarboxylic Acid Metabolism	2-oxocarboxylic Acid Metabolism	-1.63801e-11	ILETA (3.20e-02, 3.20e-02)
glu__L	L-glutamate(1-)	L-Glu	Alanine, Aspartate And Glutamate Metabolism	AA central (A/D/E,G/S/T)	-0.770975	PSERT (5.29e-01, 8.83e-01); GLUNm (4.48e-01, 4.48e-01); GLUDxm (0.00e+00, 3.30e-01); ASPTAm (0.00e+00, 9.67e-02); ASPTA (4.77e-02, 4.77e-02); ALATA__L (3.11e-02, 0.00e+00); GLUPRT (6.71e-03, 6.71e-03)
ile__L	L-isoleucine	L-isoleucine	Valine, Leucine And Isoleucine Biosynthesis	BCAA metabolism (Val/Leu/Iso)	-1.63801e-11	ILETA (3.20e-02, 3.20e-02)
adp	ADP	ATP/ADP	Purine Synthesis	Nucleotide metabolism	9.65138e-11	PRFGS (6.71e-03, 6.71e-03); PRAGSr (6.71e-03, 6.71e-03); r0666 (6.71e-03, 6.71e-03); PRASCS (6.71e-03, 6.71e-03)
leu__L	L-leucine	L-leucine	Transport, Endosomal	Transport, Endosomal	2.36525e-11	LEUtec (5.00e-02, 5.00e-02)
gly	Glycine	Glycine	Purine Metabolism	Nitrogen disposal	9.65132e-11	PRAGSr (6.71e-03, 6.71e-03)
o2	O2	O2	Sphingolipid Metabolism	Lipid metabolism	2.36416e-11	RE2675C (7.31e-04, 7.31e-04)
2maacoa	2-methylacetoacetyl-CoA(4-)	2-Methylacetoacetyl-CoA(4-)	Valine, Leucine And Isoleucine Biosynthesis	BCAA metabolism (Val/Leu/Iso)	-1.63801e-11	HACD9m (3.20e-02, 3.20e-02); ACACT10m (3.20e-02, 3.20e-02)
dump	dUMP	DUMP	Nucleotide Interconversion	Nucleotide metabolism	-1.59747e-11	URIDK2 (2.41e-02, 2.41e-02); DURIK1 (2.32e-02, 2.32e-02); TMDSm (1.20e-03, 1.20e-03); DUTPDPm (1.20e-03, 1.20e-03)
ser__L	L-serine	L-ser	Biosynthesis Of Amino Acids	Biosynthesis Of Amino Acids	-0.740843	GHMT2rm (5.29e-01, 8.83e-01)
pro__L	L-proline	L-Pro	Pseudoreactions	Pseudoreactions	2.36503e-11	EX_pro__L_e (2.32e-02, 2.32e-02)
glu__L	L-glutamate(1-)	L-Glu	Cysteine And Methionine Metabolism	AA other (Cys/Met/Lys/Arg/Pro)	-0.740843	PSERT (5.29e-01, 8.83e-01)
utp	UTP	UTP	Nucleotide Interconversion	Nucleotide metabolism	-1.93711e-11	r0475 (2.29e-02, 2.29e-02)
dgmp	dGMP	dGMP	Nucleotide Metabolism	Nucleotide metabolism	-1.66684e-11	NTD8 (2.44e-02, 2.44e-02)
ser__L	L-serine	L-ser	Methane Metabolism	Methane Metabolism	-0.740843	GHMT2rm (5.29e-01, 8.83e-01)
dhap	Dihydroxyacetone phosphate	DHAP	Glycolysis/Gluconeogenesis	Central Energy Metabolism	-5.54193e-14	TPI (4.97e+00, 4.97e+00)
ala__L	L-alanine	L-Ala	Biomass And Maintenance Functions	Biomass And Maintenance Functions	2.36426e-11	BIOMASS_maintenance (3.42e-02, 3.42e-02)
ala__L	L-alanine	L-Ala	Biosynthesis Of Amino Acids	Biosynthesis Of Amino Acids	6	ALATA__L (3.11e-02, 0.00e+00)
h2o	Water	H2O	Butanoate Metabolism	Butanoate Metabolism	-1	HMGCOASim (9.19e-03, 9.19e-03); ECOAH1m (0.00e+00, 9.19e-03)
mal__L	(S)-malate(2-)	(S)-malate(2-)	Pyruvate Metabolism	Central Energy Metabolism	0.689357	FUMm (9.26e-01, 5.70e-01); ME2m (7.69e-01, 8.75e-02); MDH (1.68e-01, 4.94e-01); FUM (1.13e-02, 1.13e-02)
glu__L	L-glutamate(1-)	L-Glu	Purine Synthesis	Nucleotide metabolism	9.65132e-11	PRFGS (6.71e-03, 6.71e-03); GLUPRT (6.71e-03, 6.71e-03)
h2o2	Hydrogen peroxide	Hydrogen peroxide	Vitamin C Metabolism	Vitamin C Metabolism	-0.0804183	ASCBOX (3.56e-02, 3.77e-02)
pi	hydrogenphosphate	HPO4	Valine, Leucine And Isoleucine Biosynthesis	BCAA metabolism (Val/Leu/Iso)	-2.84467e-11	PPCOACm (4.73e-02, 4.73e-02)
ggn	primed glycogenin (glycogenin-8[1,4-Glc])	Primed glycogenin (glycogenin-8[1,4-Glc])	Extracellular Transport	Extracellular Transport	2.36567e-11	r1402 (8.78e-04, 8.78e-04)
asp__L	L-aspartate(1-)	L-aspartate(1-)	Biosynthesis Of Amino Acids	Biosynthesis Of Amino Acids	-1.59712	ASPTAm (0.00e+00, 9.67e-02); ASPTA (4.77e-02, 4.77e-02)
g3pc	sn-Glycero-3-phosphocholine	Sn-Glycero-3-phosphocholine	Glycerophospholipid Metabolism	Lipid metabolism	-1.27761e-11	GPDDA1 (9.00e-03, 9.00e-03); LPASE (9.00e-03, 9.00e-03)
gly	Glycine	Glycine	Folate Metabolism	Folate Metabolism	-0.740843	GHMT2rm (5.29e-01, 8.83e-01)
fum	Fumarate	Fumarate	Nucleotide Interconversion	Nucleotide metabolism	1.29607e-10	ADSL1 (4.61e-03, 4.61e-03)
2pg	D-Glycerate 2-phosphate	D-Glycerate 2-phosphate	Biosynthesis Of Amino Acids	Biosynthesis Of Amino Acids	0.0554195	ENO (9.41e+00, 9.06e+00); PGM (9.41e+00, 9.06e+00)
imp	IMP	IMP	Nucleotide Metabolism	Nucleotide metabolism	-0.0367857	r0276 (9.71e-01, 9.96e-01); GMPR (9.69e-01, 9.94e-01); ADSS (4.61e-03, 4.61e-03)
arg__L	L-argininium(1+)	Arg	Biomass And Maintenance Functions	Biomass And Maintenance Functions	2.36426e-11	BIOMASS_maintenance (3.42e-02, 3.42e-02)
h	proton	H	Extracellular Transport	Extracellular Transport	-1.49628	GLNtN1 (4.00e-01, 4.90e-01); OAAt_1 (1.20e-01, 4.46e-01); BTNt4i (4.75e-03, 3.08e-01); BTNt2 (4.75e-03, 3.08e-01); ALAtN1 (0.00e+00, 3.11e-02); ASNtN1 (1.70e-02, 0.00e+00); HIStN1 (1.22e-02, 1.22e-02); PCt (9.00e-03, 9.00e-03); CHOLESTle (9.00e-03, 9.00e-03); PSFLIP (1.71e-03, 1.71e-03); INSTt2 (6.22e-04, 6.22e-04)
accoa	Acetyl-CoA	Acetyl-CoA	Butanoate Metabolism	Butanoate Metabolism	0.415037	HMGCOASim (9.19e-03, 9.19e-03); HMGLm (9.19e-03, 9.19e-03); ACACT1r (9.19e-03, 9.19e-03); ACACT1rm (9.19e-03, 0.00e+00)
ru5p__D	D-ribulose 5-phosphate(2-)	D-ribulose 5-phosphate(2-)	Pentose Phosphate Pathway	Redox & Pentose Metabolism	3.71447e-11	RPI (1.19e-02, 1.19e-02); GND (1.19e-02, 1.19e-02)
nad	Nicotinamide adenine dinucleotide	NAD(+)	Valine, Leucine And Isoleucine Biosynthesis	BCAA metabolism (Val/Leu/Iso)	-3.46172e-11	HACD9m (3.20e-02, 3.20e-02); HIBDm (1.53e-02, 1.53e-02); MMSAD1m (1.53e-02, 1.53e-02)
val__L	L-valine	L-Val	2-oxocarboxylic Acid Metabolism	2-oxocarboxylic Acid Metabolism	-5.37022e-11	VALTA (1.53e-02, 1.53e-02)
ppi	Diphosphate	PPi	Transport, Endoplasmic Reticulum	Transport, Endoplasmic Reticulum	-3.91896e-11	PPItr (5.22e-03, 5.22e-03)
oaa	Oxaloacetate	Oxaloacetate	Citric Acid Cycle	Central Energy Metabolism	0.493766	MDH (1.68e-01, 4.94e-01); PCm (3.32e-01, 9.67e-02); CSm (3.32e-01, 0.00e+00)
atp	ATP	ATP/ADP	Extracellular Transport	Extracellular Transport	-3.29439e-11	PCt (9.00e-03, 9.00e-03); PSFLIP (1.71e-03, 1.71e-03); r1402 (8.78e-04, 8.78e-04)
hmgcoa	Hydroxymethylglutaryl-CoA	HMG-CoA	Synthesis And Degradation Of Ketone Bodies	Lipid metabolism	-2.3267e-11	HMGCOASim (9.19e-03, 9.19e-03)
succ	Succinate	Succinate	Propanoate Metabolism	Propanoate Metabolism	0.700208	SUCOASm (9.26e-01, 5.70e-01)
inost	myo-inositol	Myo-inositol	Pseudoreactions	Pseudoreactions	2.36583e-11	EX_inost_e (6.22e-04, 6.22e-04)
nadh	Nicotinamide adenine dinucleotide - reduced	NAD(+)	Fatty Acid Degradation	Lipid metabolism	-6	HACD1m (0.00e+00, 9.19e-03)
adp	ADP	ATP/ADP	Biosynthesis Of Amino Acids	Biosynthesis Of Amino Acids	0.0438553	PGK (9.94e+00, 9.94e+00); PYK (9.41e+00, 9.06e+00); PCm (3.32e-01, 9.67e-02); r0034 (5.22e-03, 5.22e-03)
pchol_hs	Phosphatidylcholine	Phosphatidylcholine	Glycerophospholipid Metabolism	Lipid metabolism	-2.88896e-11	CEPTC (1.65e-02, 1.65e-02); PSSA1_hs (2.27e-03, 2.27e-03)
dcamp	N6-(1,2-Dicarboxyethyl)-AMP	N6-(1,2-Dicarboxyethyl)-AMP	Nucleotide Interconversion	Nucleotide metabolism	1.29607e-10	ADSS (4.61e-03, 4.61e-03); ADSL1 (4.61e-03, 4.61e-03)
didp	dIDP	DIDP	Nucleotide Interconversion	Nucleotide metabolism	-1.13494e-10	NDPK10 (1.20e-03, 1.20e-03); NDPK10n (1.20e-03, 1.20e-03)
2oxoadp	2-oxoadipate(2-)	Adipates	Tryptophan Metabolism	AAA metabolism (Trp/Phe/Tyr)	-6	2OXOADOXm (0.00e+00, 9.19e-03)
gthrd	Reduced glutathione	Reduced glutathione	Pseudoreactions	Pseudoreactions	1.21128	EX_gthrd_e (4.29e-02, 1.85e-02)
2oxoadp	2-oxoadipate(2-)	Adipates	Biosynthesis Of Amino Acids	Biosynthesis Of Amino Acids	-6	r0450 (0.00e+00, 9.19e-03)
cytd	Cytidine	Cytidine	Pyrimidine Catabolism	Nucleotide metabolism	-1.90692e-11	CYTDe (1.54e-02, 1.54e-02)
mmcoa_R	(R)-methylmalonyl-CoA(5-)	(R)-methylmalonyl-CoA(5-)	Valine, Leucine And Isoleucine Biosynthesis	BCAA metabolism (Val/Leu/Iso)	-3.19225e-11	MMMm (4.73e-02, 4.73e-02); MMEm (4.73e-02, 4.73e-02)
nadh	Nicotinamide adenine dinucleotide - reduced	NAD(+)	Lysine Degradation	AA other (Cys/Met/Lys/Arg/Pro)	-6	r0525 (0.00e+00, 9.19e-03); HACD1m (0.00e+00, 9.19e-03)
aacoa	Acetoacetyl-CoA	Acetoacetyl-CoA	Fatty Acid Degradation	Lipid metabolism	-3.219e-11	HACD1m (0.00e+00, 9.19e-03); ACACT1r (9.19e-03, 9.19e-03); ACACT1rm (9.19e-03, 0.00e+00)
nad	Nicotinamide adenine dinucleotide	NAD(+)	Taurine And Hypotaurine Metabolism	Taurine And Hypotaurine Metabolism	-6	GLUDxm (0.00e+00, 3.30e-01)
gdp	GDP	GDP	Purine Metabolism	Nitrogen disposal	2.3476e-11	GK1 (2.65e-02, 2.65e-02); NDPK1 (5.85e-03, 5.85e-03); ADSS (4.61e-03, 4.61e-03)
glu__L	L-glutamate(1-)	L-Glu	Tryptophan Metabolism	AAA metabolism (Trp/Phe/Tyr)	9.65144e-11	3HKYNAKGAT (1.34e-02, 1.34e-02)
phe__L	L-phenylalanine	L-Phe	Biomass And Maintenance Functions	Biomass And Maintenance Functions	2.36426e-11	BIOMASS_maintenance (3.42e-02, 3.42e-02)
r5p	alpha-D-Ribose 5-phosphate	Alpha-D-Ribose 5-phosphate	Pentose Phosphate Pathway	Redox & Pentose Metabolism	5.75592e-12	PRPPS (3.68e-02, 3.68e-02); PPM (2.49e-02, 2.49e-02); RPI (1.19e-02, 1.19e-02)
nadph	Nicotinamide adenine dinucleotide phosphate - reduced	NADP(+)	Alanine, Aspartate And Glutamate Metabolism	AA central (A/D/E,G/S/T)	-0.0251411	r0553m (2.79e+00, 2.84e+00); r0553 (1.26e+00, 1.28e+00)
glu__L	L-glutamate(1-)	L-Glu	Biosynthesis Of Amino Acids	Biosynthesis Of Amino Acids	-0.0267994	PHETA1m (1.10e+01, 1.10e+01); PHETA1 (1.10e+01, 1.10e+01); PSERT (5.29e-01, 8.83e-01); ASPTAm (0.00e+00, 9.67e-02); ASPTA (4.77e-02, 4.77e-02); ILETA (3.20e-02, 3.20e-02); ALATA__L (3.11e-02, 0.00e+00); VALTA (1.53e-02, 1.53e-02); r0450 (0.00e+00, 9.19e-03)
nadp	Nicotinamide adenine dinucleotide phosphate	NADP(+)	Glutathione Metabolism	Redox & Pentose Metabolism	3.71447e-11	GND (1.19e-02, 1.19e-02)
dctp	dCTP	dCTP	Biomass And Maintenance Functions	Biomass And Maintenance Functions	2.36426e-11	BIOMASS_maintenance (3.42e-02, 3.42e-02)
pi	hydrogenphosphate	HPO4	Pyrimidine Metabolism	Nucleotide metabolism	-1.83255e-11	PYNP2r (2.32e-02, 2.32e-02); CTPS2 (1.84e-02, 1.84e-02); NTD2 (7.85e-03, 7.85e-03); ASPCTr (5.22e-03, 5.22e-03)
aacoa	Acetoacetyl-CoA	Acetoacetyl-CoA	Lysine Degradation	AA other (Cys/Met/Lys/Arg/Pro)	-3.219e-11	HACD1m (0.00e+00, 9.19e-03); ACACT1r (9.19e-03, 9.19e-03); ACACT1rm (9.19e-03, 0.00e+00)
lys__L	L-lysinium(1+)	Lys	Lysine Degradation	AA other (Cys/Met/Lys/Arg/Pro)	-6	SACCD3m (0.00e+00, 9.19e-03)
glu__L	L-glutamate(1-)	L-Glu	Methane Metabolism	Methane Metabolism	-0.740843	PSERT (5.29e-01, 8.83e-01)
ump	UMP	UMP	Nucleotide Metabolism	Nucleotide metabolism	-1.81128e-11	NTD2 (7.85e-03, 7.85e-03)
nadh	Nicotinamide adenine dinucleotide - reduced	NAD(+)	Propanoate Metabolism	Propanoate Metabolism	-6	MMSAD3m (0.00e+00, 9.67e-02)
methf	5,10-Methenyltetrahydrofolate	5,10-Methenyltetrahydrofolate	Folate Metabolism	Folate Metabolism	-0.741499	MTHFD2m (1.06e+00, 1.77e+00); MTHFCm (1.06e+00, 1.77e+00)
oaa	Oxaloacetate	Oxaloacetate	Glyoxylate And Dicarboxylate Metabolism	Glyoxylate And Dicarboxylate Metabolism	0.0173828	MDH (1.68e-01, 4.94e-01); CSm (3.32e-01, 0.00e+00)
oaa	Oxaloacetate	Oxaloacetate	2-oxocarboxylic Acid Metabolism	2-oxocarboxylic Acid Metabolism	1.39334	CSm (3.32e-01, 0.00e+00); ASPTAm (0.00e+00, 9.67e-02); ASPTA (4.77e-02, 4.77e-02)
q10	ubiquinone-10	Ubiquinone-10	Glycerophospholipid Metabolism	Lipid metabolism	-6	r0205 (0.00e+00, 9.77e-01)
adn	Adenosine	Ado	Purine Metabolism	Nitrogen disposal	9.21174e-11	PUNP1 (1.20e-03, 1.20e-03); NTD7 (1.20e-03, 1.20e-03)
nadh	Nicotinamide adenine dinucleotide - reduced	NAD(+)	Pyruvate Metabolism	Central Energy Metabolism	-0.000279459	LDH__L (9.37e+00, 9.05e+00); MDH (1.68e-01, 4.94e-01)
h2o	Water	H2O	Citric Acid Cycle	Central Energy Metabolism	1.12644	FUMm (9.26e-01, 5.70e-01); CSm (3.32e-01, 0.00e+00); FUM (1.13e-02, 1.13e-02)
pyr	pyruvate	Pyr	Pyruvate Metabolism	Central Energy Metabolism	0.120583	PYK (9.41e+00, 9.06e+00); LDH__L (9.37e+00, 9.05e+00); ME2m (7.69e-01, 8.75e-02); PCm (3.32e-01, 9.67e-02)
orot5p	Orotidine 5-phosphate	Orotidine 5-phosphate	Pyrimidine Metabolism	Nucleotide metabolism	-3.91898e-11	OMPDC (5.22e-03, 5.22e-03); ORPT (5.22e-03, 5.22e-03)
Lkynr	L-kynurenine	L-kynurenine	Tryptophan Metabolism	AAA metabolism (Trp/Phe/Tyr)	9.65141e-11	KYN3OX (1.34e-02, 1.34e-02); FKYNH (1.34e-02, 1.34e-02)
co2	carbon dioxide	CO2	Beta-alanine Metabolism	Beta-alanine Metabolism	-6	MMSAD3m (0.00e+00, 9.67e-02); ASP1DCm (0.00e+00, 9.67e-02)
akg	2-Oxoglutarate	Î±-KG	Pantothenate And Coa Biosynthesis	Pantothenate And Coa Biosynthesis	-5.37022e-11	VALTA (1.53e-02, 1.53e-02)
coa	Coenzyme A	CoA	Tryptophan Metabolism	AAA metabolism (Trp/Phe/Tyr)	-3.219e-11	2OXOADOXm (0.00e+00, 9.19e-03); ACACT1r (9.19e-03, 9.19e-03); ACACT1rm (9.19e-03, 0.00e+00)
h	proton	H	Lysine Degradation	AA other (Cys/Met/Lys/Arg/Pro)	-6	r0525 (0.00e+00, 9.19e-03); HACD1m (0.00e+00, 9.19e-03); SACCD3m (0.00e+00, 9.19e-03)
3pg	3-Phospho-D-glycerate	3-PG	Glycine, Serine And Threonine Metabolism	AA central (A/D/E,G/S/T)	-6.80728e-14	PGM (9.41e+00, 9.06e+00); PGCD (5.29e-01, 8.83e-01)
hco3	Bicarbonate	HCO3	Biosynthesis Of Amino Acids	Biosynthesis Of Amino Acids	1.77825	PCm (3.32e-01, 9.67e-02)
nh4	Ammonium	NH4	Purine Metabolism	Nitrogen disposal	-0.0368721	r0276 (9.71e-01, 9.96e-01); GMPR (9.69e-01, 9.94e-01)
L2aadp	L-2-aminoadipate(1-)	Adipates	Lysine Metabolism	AA other (Cys/Met/Lys/Arg/Pro)	-6	r0594m (0.00e+00, 9.19e-03); r0450 (0.00e+00, 9.19e-03)
g6p	D-Glucose 6-phosphate	D-Glucose 6-phosphate	Biomass And Maintenance Functions	Biomass And Maintenance Functions	2.36426e-11	BIOMASS_maintenance (3.42e-02, 3.42e-02)
cys__L	L-cysteine	L-Cys	Glutathione Metabolism	Redox & Pentose Metabolism	0.838556	AMPTASECG (3.31e-02, 1.85e-02)
aacoa	Acetoacetyl-CoA	Acetoacetyl-CoA	Pyruvate Metabolism	Central Energy Metabolism	1	ACACT1r (9.19e-03, 9.19e-03); ACACT1rm (9.19e-03, 0.00e+00)
ump	UMP	UMP	Pyrimidine Synthesis	Nucleotide metabolism	-3.91901e-11	OMPDC (5.22e-03, 5.22e-03)
nad	Nicotinamide adenine dinucleotide	NAD(+)	Inositol Phosphate Metabolism	Inositol Phosphate Metabolism	-6	MMSAD3m (0.00e+00, 9.67e-02)
adp	ADP	ATP/ADP	Valine, Leucine And Isoleucine Biosynthesis	BCAA metabolism (Val/Leu/Iso)	-2.84467e-11	PPCOACm (4.73e-02, 4.73e-02)
malcoa	Malonyl-CoA	Malonyl-CoA	Pyruvate Metabolism	Central Energy Metabolism	-2.32668e-11	ACCOACm (1.29e-01, 1.29e-01)
lpchol_hs	lysophosphatidylcholine	Lysophosphatidylcholine	Transport, Endosomal	Transport, Endosomal	-1.277e-11	LPCHOLt (9.00e-03, 9.00e-03)
fdp	D-Fructose 1,6-bisphosphate	F1,6BP	Glycolysis/Gluconeogenesis	Central Energy Metabolism	-8.0406e-14	PFK (4.98e+00, 4.98e+00)
2mop	2-methyl-3-oxopropanoate	2-Methyl-3-oxopropanoate	Valine, Leucine And Isoleucine Biosynthesis	BCAA metabolism (Val/Leu/Iso)	-5.37024e-11	HIBDm (1.53e-02, 1.53e-02); MMSAD1m (1.53e-02, 1.53e-02)
phe__L	L-phenylalanine	L-Phe	Transport, Mitochondrial	Mitochondrial transport	0.000241835	HUMANGEM_MAR05116 (1.10e+01, 1.10e+01)
3hmp	3-hydroxy-2-methylpropanoate	3-Hydroxy-2-methylpropanoate	Valine, Leucine And Isoleucine Biosynthesis	BCAA metabolism (Val/Leu/Iso)	-5.37024e-11	3HBCOAHLm (1.53e-02, 1.53e-02); HIBDm (1.53e-02, 1.53e-02)
h2o	Water	H2O	Lysine Metabolism	AA other (Cys/Met/Lys/Arg/Pro)	-6	r0525 (0.00e+00, 9.19e-03); r0594m (0.00e+00, 9.19e-03); SACCD3m (0.00e+00, 9.19e-03)
fpram	2-(Formamido)-N1-(5-phospho-D-ribosyl)acetamidine	2-(Formamido)-N1-(5-phospho-D-ribosyl)acetamidine	Purine Synthesis	Nucleotide metabolism	9.65132e-11	PRFGS (6.71e-03, 6.71e-03); r0666 (6.71e-03, 6.71e-03)
glyb	glycine betaine	Glycine betaine	Glycine, Serine And Threonine Metabolism	AA central (A/D/E,G/S/T)	-0.0251411	r0552m (2.79e+00, 2.84e+00); r0553m (2.79e+00, 2.84e+00); r0552 (1.26e+00, 1.28e+00); r0553 (1.26e+00, 1.28e+00)
q10h2	Ubiquinol-10	Ubiquinol-10	Oxidative Phosphorylation	Oxidative Phosphorylation	-0.0201406	CYOR_u10m (7.12e+00, 7.53e+00); NADH2_u10m (6.15e+00, 5.92e+00)
h	proton	H	Synthesis And Degradation Of Ketone Bodies	Lipid metabolism	-2.3267e-11	HMGCOASim (9.19e-03, 9.19e-03)
lys__L	L-lysinium(1+)	Lys	Biomass And Maintenance Functions	Biomass And Maintenance Functions	2.36426e-11	BIOMASS_maintenance (3.42e-02, 3.42e-02)
malcoa	Malonyl-CoA	Malonyl-CoA	Fatty Acid Biosynthesis	Lipid metabolism	-2.32666e-11	ACCOACm (1.29e-01, 1.29e-01); FAS140COA (1.84e-02, 1.84e-02); FAS80COA__L (1.84e-02, 1.84e-02); FAS100COA (1.84e-02, 1.84e-02); FAS120COA (1.84e-02, 1.84e-02); FAS160COA (1.84e-02, 1.84e-02)
thf	5,6,7,8-Tetrahydrofolate	THF	Cyanoamino Acid Metabolism	Cyanoamino Acid Metabolism	-0.740843	GHMT2rm (5.29e-01, 8.83e-01)
L2aadp	L-2-aminoadipate(1-)	Adipates	2-oxocarboxylic Acid Metabolism	2-oxocarboxylic Acid Metabolism	-6	r0450 (0.00e+00, 9.19e-03)
glu__L	L-glutamate(1-)	L-Glu	Valine, Leucine And Isoleucine Biosynthesis	BCAA metabolism (Val/Leu/Iso)	-2.84466e-11	ILETA (3.20e-02, 3.20e-02); VALTA (1.53e-02, 1.53e-02)
acac	acetoacetate	Acetoacetate	Cholesterol Metabolism	Lipid metabolism	-2.3267e-11	HMGLm (9.19e-03, 9.19e-03)
dttp	dTTP	dTTP	Biomass And Maintenance Functions	Biomass And Maintenance Functions	2.36426e-11	BIOMASS_maintenance (3.42e-02, 3.42e-02)
didp	dIDP	DIDP	Nucleotide Metabolism	Nucleotide metabolism	-1.13494e-10	NDPK10 (1.20e-03, 1.20e-03); NDPK10n (1.20e-03, 1.20e-03)
3hbcoa	(S)-3-hydroxybutanoyl-CoA(4-)	SC acyl-CoA	Lysine Degradation	AA other (Cys/Met/Lys/Arg/Pro)	-6	HACD1m (0.00e+00, 9.19e-03); ECOAH1m (0.00e+00, 9.19e-03)
nadph	Nicotinamide adenine dinucleotide phosphate - reduced	NADP(+)	Tryptophan Metabolism	AAA metabolism (Trp/Phe/Tyr)	9.65141e-11	KYN3OX (1.34e-02, 1.34e-02)
h2o	Water	H2O	Glyoxylate And Dicarboxylate Metabolism	Glyoxylate And Dicarboxylate Metabolism	-0.0384955	GHMT2rm (5.29e-01, 8.83e-01); CSm (3.32e-01, 0.00e+00)
h2o	Water	H2O	2-oxocarboxylic Acid Metabolism	2-oxocarboxylic Acid Metabolism	6	CSm (3.32e-01, 0.00e+00)
nadp	Nicotinamide adenine dinucleotide phosphate	NADP(+)	Purine Metabolism	Nitrogen disposal	-0.0368721	r0276 (9.71e-01, 9.96e-01); GMPR (9.69e-01, 9.94e-01)
mmcoa_S	(S)-methylmalonyl-CoA(5-)	(S)-methylmalonyl-CoA(5-)	Valine, Leucine And Isoleucine Degradation	BCAA metabolism (Val/Leu/Iso)	-3.01846e-11	PPCOACm (4.73e-02, 4.73e-02); MMEm (4.73e-02, 4.73e-02)
h	proton	H	Biomass And Maintenance Functions	Biomass And Maintenance Functions	4.35666e-14	ATPM (1.85e+01, 1.85e+01); BIOMASS_maintenance (3.42e-02, 3.42e-02)
h	proton	H	Pyrimidine Catabolism	Nucleotide metabolism	-1.67981e-11	CYTDe (1.54e-02, 1.54e-02); DCMPDA (8.62e-04, 8.62e-04)
nadp	Nicotinamide adenine dinucleotide phosphate	NADP(+)	Ascorbate And Aldarate Metabolism	Ascorbate And Aldarate Metabolism	-0.0804183	DASCBR (3.56e-02, 3.77e-02)
ppi	Diphosphate	PPi	Pyrimidine Metabolism	Nucleotide metabolism	-3.91896e-11	ORPT (5.22e-03, 5.22e-03)
saccrp__L	L-saccharopinate(1-)	L-saccharopinate(1-)	Lysine Degradation	AA other (Cys/Met/Lys/Arg/Pro)	-6	r0525 (0.00e+00, 9.19e-03); SACCD3m (0.00e+00, 9.19e-03)
hLkynr	3-hydroxy-L-kynurenine	3-Hydroxy-L-kynurenine	Tryptophan Metabolism	AAA metabolism (Trp/Phe/Tyr)	9.65144e-11	KYN3OX (1.34e-02, 1.34e-02); 3HKYNAKGAT (1.34e-02, 1.34e-02)
atp	ATP	ATP/ADP	Biomass And Maintenance Functions	Biomass And Maintenance Functions	4.35666e-14	ATPM (1.85e+01, 1.85e+01); BIOMASS_maintenance (3.42e-02, 3.42e-02)
ala_B	beta-alanine	Beta-alanine	Propanoate Metabolism	Propanoate Metabolism	-6	APAT2rm (0.00e+00, 9.67e-02)
co2	carbon dioxide	CO2	Pyrimidine Metabolism	Nucleotide metabolism	-3.91901e-11	OMPDC (5.22e-03, 5.22e-03)
chol	Choline	Choline	Glycerophospholipid Metabolism	Lipid metabolism	-2.36597e-11	CHOLK (1.65e-02, 1.65e-02); GPDDA1 (9.00e-03, 9.00e-03); PSSA1_hs (2.27e-03, 2.27e-03)
nad	Nicotinamide adenine dinucleotide	NAD(+)	Butanoate Metabolism	Butanoate Metabolism	-6	HACD1m (0.00e+00, 9.19e-03)
glu__L	L-glutamate(1-)	L-Glu	Taurine And Hypotaurine Metabolism	Taurine And Hypotaurine Metabolism	-6	GLUDxm (0.00e+00, 3.30e-01)
adp	ADP	ATP/ADP	Pyrimidine Metabolism	Nucleotide metabolism	-1.10299e-11	URIDK2 (2.41e-02, 2.41e-02); CTPS2 (1.84e-02, 1.84e-02); CYTDK1 (7.52e-03, 7.52e-03); NDPK3m (2.13e-03, 2.13e-03); CYTK1 (1.72e-03, 1.72e-03); NDPK6m (1.20e-03, 1.20e-03); NDPK4n (1.20e-03, 1.20e-03); CYTK1m (5.02e-04, 5.02e-04)
accoa	Acetyl-CoA	Acetyl-CoA	Glyoxylate And Dicarboxylate Metabolism	Glyoxylate And Dicarboxylate Metabolism	5.25087	CSm (3.32e-01, 0.00e+00); ACACT1r (9.19e-03, 9.19e-03); ACACT1rm (9.19e-03, 0.00e+00)
b2coa	crotonoyl-CoA(4-)	SC acyl-CoA	Fatty Acid Degradation	Lipid metabolism	-6	ECOAH1m (0.00e+00, 9.19e-03)
coa	Coenzyme A	CoA	Valine, Leucine And Isoleucine Biosynthesis	BCAA metabolism (Val/Leu/Iso)	-3.19607e-11	r0604 (3.20e-02, 3.20e-02); ACACT10m (3.20e-02, 3.20e-02); 3HBCOAHLm (1.53e-02, 1.53e-02); r0561 (1.53e-02, 1.53e-02); MMSAD1m (1.53e-02, 1.53e-02)
adp	ADP	ATP/ADP	Starch And Sucrose Metabolism	Starch And Sucrose Metabolism	3.2675e-14	HEX1 (5.00e+00, 5.00e+00)
ddcacoa	Dodecanoyl-CoA (n-C12:0CoA)	Dodecanoyl-CoA (n-C12:0CoA)	Fatty Acid Biosynthesis	Lipid metabolism	-2.32666e-11	FAS140COA (1.84e-02, 1.84e-02); FAS120COA (1.84e-02, 1.84e-02)
coa	Coenzyme A	CoA	Terpenoid Backbone Biosynthesis	Terpenoid Backbone Biosynthesis	0.584963	HMGCOASim (9.19e-03, 9.19e-03); ACACT1r (9.19e-03, 9.19e-03); ACACT1rm (9.19e-03, 0.00e+00)
nadh	Nicotinamide adenine dinucleotide - reduced	NAD(+)	Sphingolipid Metabolism	Lipid metabolism	2.36416e-11	RE2675C (7.31e-04, 7.31e-04)
o2	O2	O2	Oxidative Phosphorylation	Oxidative Phosphorylation	-0.0804183	CYOOm3 (3.56e+00, 3.77e+00)
lys__L	L-lysinium(1+)	Lys	Transport, Mitochondrial	Mitochondrial transport	-6	LYStm (0.00e+00, 9.19e-03)
ppcoa	Propanoyl-CoA	Propanoyl-CoA	Valine, Leucine And Isoleucine Biosynthesis	BCAA metabolism (Val/Leu/Iso)	-2.84464e-11	PPCOACm (4.73e-02, 4.73e-02); ACACT10m (3.20e-02, 3.20e-02); MMSAD1m (1.53e-02, 1.53e-02)
orot	Orotate	Orotate	Transport, Mitochondrial	Mitochondrial transport	-3.91896e-11	DHORD9 (5.22e-03, 5.22e-03)
lpam	lipoamide	Lipoamide	Alanine, Aspartate And Glutamate Metabolism	AA central (A/D/E,G/S/T)	-0.740843	GCC2am (5.29e-01, 8.83e-01)
b2coa	crotonoyl-CoA(4-)	SC acyl-CoA	Lysine Degradation	AA other (Cys/Met/Lys/Arg/Pro)	-6	ECOAH1m (0.00e+00, 9.19e-03)
cdp	CDP	CDP	Pyrimidine Metabolism	Nucleotide metabolism	2.36515e-11	NDPK3m (2.13e-03, 2.13e-03); CYTK1 (1.72e-03, 1.72e-03); CYTK1m (5.02e-04, 5.02e-04)
ppi	Diphosphate	PPi	Pentose And Glucuronate Interconversions	Redox & Pentose Metabolism	-3.86367e-11	GALU (2.63e-03, 2.63e-03)
nh4	Ammonium	NH4	Nucleotide Metabolism	Nucleotide metabolism	-0.0368721	r0276 (9.71e-01, 9.96e-01); GMPR (9.69e-01, 9.94e-01)
glu__L	L-glutamate(1-)	L-Glu	Pyrimidine Metabolism	Nucleotide metabolism	-1.19744e-11	CTPS2 (1.84e-02, 1.84e-02)
oaa	Oxaloacetate	Oxaloacetate	Extracellular Transport	Extracellular Transport	-1.89033	OAAt_1 (1.20e-01, 4.46e-01)
3hmbcoa	(2S,3S)-3-hydroxy-2-methylbutanoyl-CoA(4-)	(2S,3S)-3-hydroxy-2-methylbutanoyl-CoA(4-)	Valine, Leucine And Isoleucine Biosynthesis	BCAA metabolism (Val/Leu/Iso)	-1.63801e-11	HACD9m (3.20e-02, 3.20e-02); ECOAH9m (3.20e-02, 3.20e-02)
xolest2_hs	cholesterol ester	Cholesterol ester	Extracellular Transport	Extracellular Transport	-1.277e-11	CHOLESTle (9.00e-03, 9.00e-03)
clpn_hs	cardiolipin	Cardiolipin	Biomass And Maintenance Functions	Biomass And Maintenance Functions	2.36426e-11	BIOMASS_maintenance (3.42e-02, 3.42e-02)
10fthf	10-Formyltetrahydrofolate	10-Formyltetrahydrofolate	Purine Metabolism	Nitrogen disposal	9.65138e-11	GARFT (6.71e-03, 6.71e-03); AICART (6.71e-03, 6.71e-03)
gly	Glycine	Glycine	Pseudoreactions	Pseudoreactions	-6	EX_gly_e (0.00e+00, 1.46e-02)
cytd	Cytidine	Cytidine	Nucleotide Interconversion	Nucleotide metabolism	-1.95238e-11	r0531 (2.29e-02, 2.29e-02); CYTDK1 (7.52e-03, 7.52e-03)
phpyr	keto-phenylpyruvate	Phenylpyruvate	Phenylalanine Metabolism	AAA metabolism (Trp/Phe/Tyr)	0.000241835	PHETA1 (1.10e+01, 1.10e+01); PHETA1m (1.10e+01, 1.10e+01)
h	proton	H	Transport, Mitochondrial	Mitochondrial transport	0.0152825	HUMANGEM_MAR11443 (1.10e+01, 1.10e+01); HUMANGEM_MAR05116 (1.10e+01, 1.10e+01); GLUt2m (1.06e+01, 1.02e+01); HUMANGEM_MAR08093 (3.20e-02, 3.20e-02); 3MOBt2im (1.53e-02, 1.53e-02); LYStm (0.00e+00, 9.19e-03)
3mop	3-methyl-2-oxopentanoate	3-Methyl-2-oxopentanoate	Biosynthesis Of Amino Acids	Biosynthesis Of Amino Acids	-1.63801e-11	ILETA (3.20e-02, 3.20e-02)
ala_B	beta-alanine	Beta-alanine	Beta-alanine Metabolism	Beta-alanine Metabolism	-6	APAT2rm (0.00e+00, 9.67e-02); ASP1DCm (0.00e+00, 9.67e-02)
atp	ATP	ATP/ADP	Transport, Mitochondrial	Mitochondrial transport	-0.0422198	ATPtm (1.19e+01, 1.23e+01)
tyr__L	L-tyrosine	L-tyrosine	Pseudoreactions	Pseudoreactions	2.36528e-11	EX_tyr__L_e (1.59e-02, 1.59e-02)
glc__D	D-glucose	Glc	Starch And Sucrose Metabolism	Starch And Sucrose Metabolism	3.2675e-14	HEX1 (5.00e+00, 5.00e+00)
occoa	Octanoyl-CoA (n-C8:0CoA)	Octanoyl-CoA (n-C8:0CoA)	Fatty Acid Biosynthesis	Lipid metabolism	-2.3267e-11	FAS80COA__L (1.84e-02, 1.84e-02); FAS100COA (1.84e-02, 1.84e-02)
cgly	L-cysteinylglycine	L-cysteinylglycine	Glutathione Metabolism	Redox & Pentose Metabolism	1.03692	AMPTASECG (3.31e-02, 1.85e-02); r0129 (3.31e-02, 1.85e-02); r0130 (9.76e-03, 0.00e+00)
chol	Choline	Choline	Pseudoreactions	Pseudoreactions	2.36637e-11	EX_chol_e (5.18e-03, 5.18e-03)
h	proton	H	Sphingolipid Metabolism	Lipid metabolism	2.36419e-11	3DSPHR (7.31e-04, 7.31e-04); SERPT (7.31e-04, 7.31e-04); DSAT (7.31e-04, 7.31e-04); RE2675C (7.31e-04, 7.31e-04)
ppi	Diphosphate	PPi	Butanoate Metabolism	Butanoate Metabolism	-2.32666e-11	AACOAT (9.19e-03, 9.19e-03)
msa	3-oxopropanoate	3-Oxopropanoate	Propanoate Metabolism	Propanoate Metabolism	-6	MMSAD3m (0.00e+00, 9.67e-02); APAT2rm (0.00e+00, 9.67e-02)
gln__L	L-glutamine	L-Gln	Pyrimidine Metabolism	Nucleotide metabolism	-1.19744e-11	CTPS2 (1.84e-02, 1.84e-02)
phpyr	keto-phenylpyruvate	Phenylpyruvate	2-oxocarboxylic Acid Metabolism	2-oxocarboxylic Acid Metabolism	0.000241835	PHETA1 (1.10e+01, 1.10e+01); PHETA1m (1.10e+01, 1.10e+01)
tdcoa	Tetradecanoyl-CoA (n-C14:0CoA)	Tetradecanoyl-CoA (n-C14:0CoA)	Fatty Acid Biosynthesis	Lipid metabolism	-2.32666e-11	FAS140COA (1.84e-02, 1.84e-02); FAS160COA (1.84e-02, 1.84e-02)
pi	hydrogenphosphate	HPO4	Citric Acid Cycle	Central Energy Metabolism	0.915802	SUCOASm (9.26e-01, 5.70e-01); PCm (3.32e-01, 9.67e-02)
oaa	Oxaloacetate	Oxaloacetate	Alanine, Aspartate And Glutamate Metabolism	AA central (A/D/E,G/S/T)	-1.59712	ASPTAm (0.00e+00, 9.67e-02); ASPTA (4.77e-02, 4.77e-02)
2mp2coa	2-Methylprop-2-enoyl-CoA	2-Methylprop-2-enoyl-CoA	Valine, Leucine And Isoleucine Biosynthesis	BCAA metabolism (Val/Leu/Iso)	-5.37022e-11	ECOAH12m (1.53e-02, 1.53e-02); r0560 (1.53e-02, 1.53e-02)
dhdascb	dehydroascorbide(1-)	Dehydroascorbide(1-)	Vitamin C Metabolism	Vitamin C Metabolism	-0.0804183	ASCBOX (3.56e-02, 3.77e-02)
ura	uracil	Uracil	Pyrimidine Catabolism	Nucleotide metabolism	-1.87457e-11	PYNP2r (2.32e-02, 2.32e-02)
nadp	Nicotinamide adenine dinucleotide phosphate	NADP(+)	Nucleotide Metabolism	Nucleotide metabolism	-0.0368721	r0276 (9.71e-01, 9.96e-01); GMPR (9.69e-01, 9.94e-01)
prpp	5-Phospho-alpha-D-ribose 1-diphosphate	5-Phospho-alpha-D-ribose 1-diphosphate	Nucleotide Salvage Pathway	Nucleotide Salvage Pathway	-9.27664e-12	GUAPRT (2.49e-02, 2.49e-02)

## Sheet: LM
metabolite_id	Metabolite	Metabolite Shortname	Metabolic Pathways	Subsystem	log2FC_fluxsum	Reactions
succoa	Succinyl-CoA	Succinyl-CoA	Valine, Leucine And Isoleucine Biosynthesis	BCAA metabolism (Val/Leu/Iso)	-0.224537	MMMm (6.29e-02, 7.35e-02)
ditp	dITP(4-)	DITP	Nucleotide Interconversion	Nucleotide metabolism	0.486035	NDPK10n (8.41e-04, 6.00e-04); NDPK10 (8.41e-04, 6.00e-04)
datp	dATP	dATP	Biomass And Maintenance Functions	Biomass And Maintenance Functions	0.486035	BIOMASS_maintenance (2.40e-02, 1.72e-02)
nad	Nicotinamide adenine dinucleotide	NAD(+)	Citric Acid Cycle	Central Energy Metabolism	0.164921	AKGDm (1.13e+00, 7.93e-01); ICDHxm (5.58e-01, 2.11e-01); MDH (3.39e-02, 5.28e-01)
ile__L	L-isoleucine	L-isoleucine	2-oxocarboxylic Acid Metabolism	2-oxocarboxylic Acid Metabolism	-0.133464	ILETA (3.73e-02, 4.10e-02)
pi	hydrogenphosphate	HPO4	Oxidative Phosphorylation	Oxidative Phosphorylation	0.0335073	ATPS4m (1.01e+01, 9.89e+00); PPAm (2.76e-01, 2.29e-01)
h2o	Water	H2O	Extracellular Transport	Extracellular Transport	0.486035	CHOLESTle (6.33e-03, 4.52e-03); PCt (6.33e-03, 4.52e-03); PSFLIP (1.20e-03, 8.58e-04); r1402 (6.17e-04, 4.41e-04)
cmp	CMP	CMP	Nucleotide Interconversion	Nucleotide metabolism	0.486035	r0531 (1.61e-02, 1.15e-02); CYTDK1 (5.28e-03, 3.77e-03); CYTK1 (1.21e-03, 8.65e-04); CYTK1m (3.53e-04, 2.52e-04)
imp	IMP	IMP	Purine Catabolism	Purine Catabolism	-0.14353	r0276 (1.06e+00, 1.17e+00)
clpn_hs	cardiolipin	Cardiolipin	Transport, Mitochondrial	Mitochondrial transport	0.486035	HUMANGEM_MAR00587 (1.59e-04, 1.13e-04)
ditp	dITP(4-)	DITP	Purine Metabolism	Nitrogen disposal	0.486035	NDPK10n (8.41e-04, 6.00e-04); NDPK10 (8.41e-04, 6.00e-04)
pi	hydrogenphosphate	HPO4	Valine, Leucine And Isoleucine Degradation	BCAA metabolism (Val/Leu/Iso)	-0.224537	PPCOACm (6.29e-02, 7.35e-02)
hmgcoa	Hydroxymethylglutaryl-CoA	HMG-CoA	Butanoate Metabolism	Butanoate Metabolism	-2.51396	HMGLm (6.46e-03, 3.69e-02); HMGCOASim (6.46e-03, 3.69e-02)
2mpdhl	S-(2-Methylpropanoyl)-dihydrolipoamide	S-(2-Methylpropanoyl)-dihydrolipoamide	Valine, Leucine And Isoleucine Biosynthesis	BCAA metabolism (Val/Leu/Iso)	-0.347877	r0385 (2.56e-02, 3.26e-02); r0561 (2.56e-02, 3.26e-02)
thf	5,6,7,8-Tetrahydrofolate	THF	Folate Metabolism	Folate Metabolism	-5.81801	FTHFDHm (0.00e+00, 7.47e-01); GHMT2rm (4.20e-04, 3.74e-01); FTHFL (9.43e-03, 6.74e-03); GARFT (4.72e-03, 3.37e-03); AICART (4.72e-03, 3.37e-03); r0226 (8.41e-04, 6.00e-04)
val__L	L-valine	L-Val	Biomass And Maintenance Functions	Biomass And Maintenance Functions	0.486035	BIOMASS_maintenance (2.40e-02, 1.72e-02)
3mop	3-methyl-2-oxopentanoate	3-Methyl-2-oxopentanoate	Transport, Mitochondrial	Mitochondrial transport	-0.133464	HUMANGEM_MAR08093 (3.73e-02, 4.10e-02)
co2	carbon dioxide	CO2	Pentose Phosphate Pathway	Redox & Pentose Metabolism	0.486035	GND (8.38e-03, 5.99e-03)
nad	Nicotinamide adenine dinucleotide	NAD(+)	Lysine Metabolism	AA other (Cys/Met/Lys/Arg/Pro)	-2.51396	2OXOADOXm (6.46e-03, 3.69e-02); r0594m (6.46e-03, 3.69e-02); r0525 (6.46e-03, 3.69e-02)
coa	Coenzyme A	CoA	Triacylglycerol Synthesis	Lipid metabolism	0.486035	GPAM_hs (1.21e-02, 8.67e-03); AGPAT1 (1.21e-02, 8.67e-03); DGAT (2.60e-04, 1.86e-04)
dhlam	dihydrolipoamide	Dihydrolipoamide	Alanine, Aspartate And Glutamate Metabolism	AA central (A/D/E,G/S/T)	-9.79716	GCC2bim (4.20e-04, 3.74e-01)
dttp	dTTP	dTTP	Nucleotide Interconversion	Nucleotide metabolism	0.486035	NDPK4n (8.41e-04, 6.00e-04)
glyc3p	Glycerol 3-phosphate	Glycerol 3-phosphate	Glycerophospholipid Metabolism	Lipid metabolism	0.486035	GPDDA1 (6.33e-03, 4.52e-03); r0202c (6.01e-03, 4.29e-03); PGPPTm (1.95e-04, 1.39e-04)
cbp	Carbamoyl phosphate	Carbamoyl phosphate	Nitrogen Metabolism	Nitrogen disposal	0.486035	r0034 (3.67e-03, 2.62e-03)
nad	Nicotinamide adenine dinucleotide	NAD(+)	Glyoxylate And Dicarboxylate Metabolism	Glyoxylate And Dicarboxylate Metabolism	-3.9597	MDH (3.39e-02, 5.28e-01)
cytd	Cytidine	Cytidine	Nucleotide Metabolism	Nucleotide metabolism	0.486035	CYTDK1 (5.28e-03, 3.77e-03)
nad	Nicotinamide adenine dinucleotide	NAD(+)	2-oxocarboxylic Acid Metabolism	2-oxocarboxylic Acid Metabolism	0.926351	AKGDm (1.13e+00, 7.93e-01); PDHm (6.11e-01, 1.70e-01); ICDHxm (5.58e-01, 2.11e-01); 2OXOADOXm (6.46e-03, 3.69e-02)
akg	2-Oxoglutarate	Î±-KG	Glycine, Serine And Threonine Metabolism	AA central (A/D/E,G/S/T)	-9.79716	PSERT (4.20e-04, 3.74e-01)
coa	Coenzyme A	CoA	Butanoate Metabolism	Butanoate Metabolism	-2.51396	HMGCOASim (6.46e-03, 3.69e-02); ACACT1r (6.46e-03, 3.69e-02); AACOAT (6.46e-03, 3.69e-02)
h	proton	H	Nucleotide Interconversion	Nucleotide metabolism	-0.122983	GMPR (1.06e+00, 1.17e+00); DURIK1 (1.63e-02, 1.16e-02); r0531 (1.61e-02, 1.15e-02); CYTDK1 (5.28e-03, 3.77e-03); ADSS (3.24e-03, 2.32e-03); TRDR (2.89e-03, 2.07e-03); DUTPDPm (8.41e-04, 6.00e-04); DADNK (8.41e-04, 6.00e-04)
nadh	Nicotinamide adenine dinucleotide - reduced	NAD(+)	Folate Metabolism	Folate Metabolism	-0.711269	r0552 (1.27e+00, 1.32e+00); MTHFD2m (0.00e+00, 7.47e-01)
gua	Guanine	Guanine	Purine Metabolism	Nitrogen disposal	0.486035	GUAPRT (1.75e-02, 1.25e-02); PUNP4 (1.72e-02, 1.22e-02); PUNP3 (3.53e-04, 2.52e-04)
accoa	Acetyl-CoA	Acetyl-CoA	Cholesterol Metabolism	Lipid metabolism	-2.51396	HMGLm (6.46e-03, 3.69e-02)
L2aadp	L-2-aminoadipate(1-)	Adipates	Lysine Degradation	AA other (Cys/Met/Lys/Arg/Pro)	-2.51396	r0450 (6.46e-03, 3.69e-02)
pa_hs	phosphatidate(2-)	PhosphatidAte(2-)	Glycerophospholipid Metabolism	Lipid metabolism	0.486035	DAGK_hs (1.13e-02, 8.08e-03); CDS (7.90e-04, 5.64e-04)
dhf	7,8-Dihydrofolate	7,8-Dihydrofolate	Nucleotide Interconversion	Nucleotide metabolism	0.486035	TMDSm (8.41e-04, 6.00e-04)
atp	ATP	ATP/ADP	Nucleotide Interconversion	Nucleotide metabolism	0.311739	ADK1 (2.63e-01, 2.20e-01); GK1 (1.86e-02, 1.33e-02); DGK1 (1.72e-02, 1.22e-02); URIDK2 (1.69e-02, 1.21e-02); DURIK1 (1.63e-02, 1.16e-02); CYTDK1 (5.28e-03, 3.77e-03); NDPK1 (4.11e-03, 2.93e-03); NDPK8 (1.68e-03, 1.20e-03); NDPK3m (1.50e-03, 1.07e-03); CYTK1 (1.21e-03, 8.65e-04); NDPK6m (8.41e-04, 6.00e-04); NDPK8m (8.41e-04, 6.00e-04); NDPK4n (8.41e-04, 6.00e-04); DADNK (8.41e-04, 6.00e-04); NDPK…
h	proton	H	Purine Metabolism	Nitrogen disposal	-0.0143415	ATPM (1.85e+01, 1.85e+01); r0276 (1.06e+00, 1.17e+00); GMPR (1.06e+00, 1.17e+00); PRPPS (2.59e-02, 1.85e-02); GARFT (4.72e-03, 3.37e-03); PRFGS (4.72e-03, 3.37e-03); PRAGSr (4.72e-03, 3.37e-03); PRASCS (4.72e-03, 3.37e-03); AIRCr (4.72e-03, 3.37e-03); ADSS (3.24e-03, 2.32e-03)
mlthf	5,10-Methylenetetrahydrofolate	CH2-THF	Methane Metabolism	Methane Metabolism	-9.79716	GHMT2rm (4.20e-04, 3.74e-01)
glutcoa	glutaryl-CoA(5-)	Glutaryl-CoA	Lysine Metabolism	AA other (Cys/Met/Lys/Arg/Pro)	-2.51396	2OXOADOXm (6.46e-03, 3.69e-02)
nh4	Ammonium	NH4	Pseudoreactions	Pseudoreactions	-0.138774	EX_nh4_e (1.07e+00, 1.17e+00)
oaa	Oxaloacetate	Oxaloacetate	Biosynthesis Of Amino Acids	Biosynthesis Of Amino Acids	1.36614	PCm (5.58e-01, 2.11e-01); CSm (5.58e-01, 2.11e-01); ASPTA (3.36e-02, 2.40e-02)
mmcoa_R	(R)-methylmalonyl-CoA(5-)	(R)-methylmalonyl-CoA(5-)	Glyoxylate And Dicarboxylate Metabolism	Glyoxylate And Dicarboxylate Metabolism	-0.224537	MMMm (6.29e-02, 7.35e-02); MMEm (6.29e-02, 7.35e-02)
pi	hydrogenphosphate	HPO4	Fatty Acid Metabolism	Lipid metabolism	0.486035	ACCOACm (9.04e-02, 0.00e+00); ACCOAC (0.00e+00, 6.46e-02)
atp	ATP	ATP/ADP	Purine Metabolism	Nitrogen disposal	0.00478634	ATPM (1.85e+01, 1.85e+01); ADK1 (2.63e-01, 2.20e-01); PRPPS (2.59e-02, 1.85e-02); GK1 (1.86e-02, 1.33e-02); PRAGSr (4.72e-03, 3.37e-03); PRFGS (4.72e-03, 3.37e-03); PRASCS (4.72e-03, 3.37e-03); NDPK1 (4.11e-03, 2.93e-03); NDPK8 (1.68e-03, 1.20e-03); NDPK8m (8.41e-04, 6.00e-04); NDPK10n (8.41e-04, 6.00e-04); NDPK10 (8.41e-04, 6.00e-04); NDPK5 (6.06e-04, 4.33e-04)
co2	carbon dioxide	CO2	Citric Acid Cycle	Central Energy Metabolism	0.74591	AKGDm (1.13e+00, 7.93e-01); ICDHxm (5.58e-01, 2.11e-01)
h2o	Water	H2O	Lysine Degradation	AA other (Cys/Met/Lys/Arg/Pro)	-2.51396	ECOAH1m (6.46e-03, 3.69e-02); SACCD3m (6.46e-03, 3.69e-02); r0525 (6.46e-03, 3.69e-02)
adp	ADP	ATP/ADP	Citric Acid Cycle	Central Energy Metabolism	0.69686	SUCOASm (1.19e+00, 8.66e-01); PCm (5.58e-01, 2.11e-01)
ser__L	L-serine	L-ser	Glyoxylate And Dicarboxylate Metabolism	Glyoxylate And Dicarboxylate Metabolism	-9.79716	GHMT2rm (4.20e-04, 3.74e-01)
accoa	Acetyl-CoA	Acetyl-CoA	Fatty Acid Degradation	Lipid metabolism	-0.0665056	ACCOACm (9.04e-02, 0.00e+00); ACCOAC (0.00e+00, 6.46e-02); ACACT1r (6.46e-03, 3.69e-02)
gar	N1-(5-Phospho-D-ribosyl)glycinamide	N1-(5-Phospho-D-ribosyl)glycinamide	Purine Metabolism	Nitrogen disposal	0.486035	GARFT (4.72e-03, 3.37e-03); PRAGSr (4.72e-03, 3.37e-03)
pgp_hs	phosphatidyl glycerol phosphate	Phosphatidyl glycerol phosphate	Transport, Mitochondrial	Mitochondrial transport	0.486035	HUMANGEM_MAR11363 (1.95e-04, 1.39e-04)
tag_hs	triglyceride	Triglyceride	Triacylglycerol Synthesis	Lipid metabolism	0.486035	DGAT (2.60e-04, 1.86e-04)
HC01376	S-(2-Methylbutanoyl)-dihydrolipoamide	S-(2-Methylbutanoyl)-dihydrolipoamide	Valine, Leucine And Isoleucine Biosynthesis	BCAA metabolism (Val/Leu/Iso)	-0.133464	r0604 (3.73e-02, 4.10e-02); r0670 (3.73e-02, 4.10e-02)
fum	Fumarate	Fumarate	Purine Synthesis	Nucleotide metabolism	0.486035	ADSL2 (4.72e-03, 3.37e-03)
co2	carbon dioxide	CO2	Lysine Metabolism	AA other (Cys/Met/Lys/Arg/Pro)	-2.51396	2OXOADOXm (6.46e-03, 3.69e-02)
lpam	lipoamide	Lipoamide	Valine, Leucine And Isoleucine Biosynthesis	BCAA metabolism (Val/Leu/Iso)	-0.224537	r0670 (3.73e-02, 4.10e-02); r0385 (2.56e-02, 3.26e-02)
aicar	5-Amino-1-(5-Phospho-D-ribosyl)imidazole-4-carboxamide	5-Amino-1-(5-Phospho-D-ribosyl)imidAzole-4-carboxamide	Purine Synthesis	Nucleotide metabolism	0.486035	ADSL2 (4.72e-03, 3.37e-03); AICART (4.72e-03, 3.37e-03)
accoa	Acetyl-CoA	Acetyl-CoA	Lysine Degradation	AA other (Cys/Met/Lys/Arg/Pro)	-2.51396	ACACT1r (6.46e-03, 3.69e-02)
glutcoa	glutaryl-CoA(5-)	Glutaryl-CoA	2-oxocarboxylic Acid Metabolism	2-oxocarboxylic Acid Metabolism	-2.51396	2OXOADOXm (6.46e-03, 3.69e-02)
co2	carbon dioxide	CO2	Valine, Leucine And Isoleucine Degradation	BCAA metabolism (Val/Leu/Iso)	-0.347877	MMSAD1m (2.56e-02, 3.26e-02)
ditp	dITP(4-)	DITP	Nucleotide Metabolism	Nucleotide metabolism	0.486035	NDPK10n (8.41e-04, 6.00e-04); NDPK10 (8.41e-04, 6.00e-04)
h2o	Water	H2O	Synthesis And Degradation Of Ketone Bodies	Lipid metabolism	-2.51396	HMGCOASim (6.46e-03, 3.69e-02)
cmp	CMP	CMP	Nucleotide Metabolism	Nucleotide metabolism	0.486035	CYTDK1 (5.28e-03, 3.77e-03); CYTK1 (1.21e-03, 8.65e-04); CYTK1m (3.53e-04, 2.52e-04)
pi	hydrogenphosphate	HPO4	Arginine Biosynthesis	AA other (Cys/Met/Lys/Arg/Pro)	0.486035	r0034 (3.67e-03, 2.62e-03)
ile__L	L-isoleucine	L-isoleucine	Extracellular Transport	Extracellular Transport	0.00253262	ILEtec (5.00e-02, 5.00e-02); r1402 (6.17e-04, 4.41e-04)
ficytC	Ferricytochrome c	Ferricytochrome c	Oxidative Phosphorylation	Oxidative Phosphorylation	0.0723853	CYOR_u10m (6.54e+00, 6.22e+00); CYOOm3 (3.27e+00, 3.11e+00)
asp__L	L-aspartate(1-)	L-aspartate(1-)	2-oxocarboxylic Acid Metabolism	2-oxocarboxylic Acid Metabolism	0.486035	ASPTA (3.36e-02, 2.40e-02)
2mop	2-methyl-3-oxopropanoate	2-Methyl-3-oxopropanoate	Valine, Leucine And Isoleucine Degradation	BCAA metabolism (Val/Leu/Iso)	-0.347877	MMSAD1m (2.56e-02, 3.26e-02)
nh4	Ammonium	NH4	Glycine, Serine And Threonine Metabolism	AA central (A/D/E,G/S/T)	-9.79716	GCC2bim (4.20e-04, 3.74e-01)
g6p	D-Glucose 6-phosphate	D-Glucose 6-phosphate	Glycolysis/Gluconeogenesis	Central Energy Metabolism	-0.000619555	HEX1 (5.00e+00, 5.00e+00); PGI (4.98e+00, 4.99e+00); PGMT (1.85e-03, 1.32e-03)
pchol_hs	Phosphatidylcholine	Phosphatidylcholine	Sphingolipid Metabolism	Lipid metabolism	0.486035	SMS (5.14e-04, 3.67e-04)
ru5p__D	D-ribulose 5-phosphate(2-)	D-ribulose 5-phosphate(2-)	Biosynthesis Of Amino Acids	Biosynthesis Of Amino Acids	0.486035	RPI (8.38e-03, 5.99e-03)
accoa	Acetyl-CoA	Acetyl-CoA	Propanoate Metabolism	Propanoate Metabolism	0.486035	ACCOACm (9.04e-02, 0.00e+00); ACCOAC (0.00e+00, 6.46e-02)
nadh	Nicotinamide adenine dinucleotide - reduced	NAD(+)	Glycolysis/Gluconeogenesis	Central Energy Metabolism	0.00617874	GAPD (9.96e+00, 9.97e+00); PDHm (6.11e-01, 1.70e-01); GCC2cm (6.34e-02, 4.48e-01)
r1p	alpha-D-Ribose 1-phosphate	Alpha-D-Ribose 1-phosphate	Pyrimidine Metabolism	Nucleotide metabolism	0.486035	PYNP2r (1.63e-02, 1.16e-02)
co2	carbon dioxide	CO2	2-oxocarboxylic Acid Metabolism	2-oxocarboxylic Acid Metabolism	0.926351	AKGDm (1.13e+00, 7.93e-01); PDHm (6.11e-01, 1.70e-01); ICDHxm (5.58e-01, 2.11e-01); 2OXOADOXm (6.46e-03, 3.69e-02)
glu__L	L-glutamate(1-)	L-Glu	Lysine Metabolism	AA other (Cys/Met/Lys/Arg/Pro)	-2.51396	r0450 (6.46e-03, 3.69e-02); r0525 (6.46e-03, 3.69e-02)
adp	ADP	ATP/ADP	Glyoxylate And Dicarboxylate Metabolism	Glyoxylate And Dicarboxylate Metabolism	-0.224537	PPCOACm (6.29e-02, 7.35e-02)
pyr	pyruvate	Pyr	Glycolysis/Gluconeogenesis	Central Energy Metabolism	0.11401	PYK (9.96e+00, 9.60e+00); PDHm (6.11e-01, 1.70e-01)
dudp	dUDP	dUDP	Nucleotide Interconversion	Nucleotide metabolism	0.486035	URIDK2 (1.69e-02, 1.21e-02); r0531 (1.61e-02, 1.15e-02); NDPK6m (8.41e-04, 6.00e-04)
h2o	Water	H2O	Biomass And Maintenance Functions	Biomass And Maintenance Functions	0.000535191	ATPM (1.85e+01, 1.85e+01); BIOMASS_maintenance (2.40e-02, 1.72e-02)
h2o	Water	H2O	Pyrimidine Catabolism	Nucleotide metabolism	0.486035	CYTDe (1.08e-02, 7.71e-03); NTD2 (5.52e-03, 3.94e-03); DCMPDA (6.06e-04, 4.33e-04)
phpyr	keto-phenylpyruvate	Phenylpyruvate	Phenylalanine, Tyrosine And Tryptophan Biosynthesis	AAA metabolism (Trp/Phe/Tyr)	0.0761316	PHETA1m (9.96e+00, 9.45e+00); PHETA1 (9.96e+00, 9.45e+00)
nad	Nicotinamide adenine dinucleotide	NAD(+)	Arginine And Proline Metabolism	AA other (Cys/Met/Lys/Arg/Pro)	-6	PRO1xm (0.00e+00, 3.84e-02)
accoa	Acetyl-CoA	Acetyl-CoA	Pyruvate Metabolism	Central Energy Metabolism	-0.0665056	ACCOACm (9.04e-02, 0.00e+00); ACCOAC (0.00e+00, 6.46e-02); ACACT1r (6.46e-03, 3.69e-02)
betald	betaine aldehyde	Betaine aldehyde	Alanine, Aspartate And Glutamate Metabolism	AA central (A/D/E,G/S/T)	-0.0280119	r0553m (2.21e+00, 2.22e+00); r0552m (2.21e+00, 2.22e+00); r0552 (1.27e+00, 1.32e+00); r0553 (1.27e+00, 1.32e+00)
q10h2	Ubiquinol-10	Ubiquinol-10	Tryptophan Metabolism	AAA metabolism (Trp/Phe/Tyr)	-2.51396	r0541 (6.46e-03, 3.69e-02)
pep	Phosphoenolpyruvate	Phosphoenolpyruvate	Biosynthesis Of Amino Acids	Biosynthesis Of Amino Acids	0.0534468	ENO (9.96e+00, 9.60e+00); PYK (9.96e+00, 9.60e+00)
Rtotal	R total	R total	Extracellular Transport	Extracellular Transport	0.486035	CHOLESTle (6.33e-03, 4.52e-03); RTOTALt (6.33e-03, 4.52e-03)
ura	uracil	Uracil	Nucleotide Interconversion	Nucleotide metabolism	0.486035	DURIPP (1.63e-02, 1.16e-02)
pi	hydrogenphosphate	HPO4	Extracellular Transport	Extracellular Transport	0.486035	PIt9 (3.78e-02, 2.70e-02); PCt (6.33e-03, 4.52e-03); PSFLIP (1.20e-03, 8.58e-04); r1402 (6.17e-04, 4.41e-04)
dttp	dTTP	dTTP	Nucleotide Metabolism	Nucleotide metabolism	0.486035	NDPK4n (8.41e-04, 6.00e-04)
met__L	L-methionine	L-Met	Extracellular Transport	Extracellular Transport	0.486035	METtec (7.55e-03, 5.39e-03); r1402 (6.17e-04, 4.41e-04)
coa	Coenzyme A	CoA	Citric Acid Cycle	Central Energy Metabolism	0.618795	SUCOASm (1.19e+00, 8.66e-01); AKGDm (1.13e+00, 7.93e-01); CSm (5.58e-01, 2.11e-01)
ctp	CTP	CTP	Pyrimidine Metabolism	Nucleotide metabolism	0.486035	CTPS2 (1.29e-02, 9.24e-03); NDPK3m (1.50e-03, 1.07e-03)
r5p	alpha-D-Ribose 5-phosphate	Alpha-D-Ribose 5-phosphate	Biosynthesis Of Amino Acids	Biosynthesis Of Amino Acids	0.486035	PRPPS (2.59e-02, 1.85e-02); RPI (8.38e-03, 5.99e-03)
akg	2-Oxoglutarate	Î±-KG	Lysine Degradation	AA other (Cys/Met/Lys/Arg/Pro)	-2.51396	SACCD3m (6.46e-03, 3.69e-02); r0450 (6.46e-03, 3.69e-02)
asn__L	L-asparagine	L-asparagine	Extracellular Transport	Extracellular Transport	0.486035	ASNtN1 (1.20e-02, 8.55e-03); r1402 (6.17e-04, 4.41e-04)
datp	dATP	dATP	Nucleotide Interconversion	Nucleotide metabolism	0.486035	NDPK8 (1.68e-03, 1.20e-03); NDPK8m (8.41e-04, 6.00e-04); ADKd (8.41e-04, 6.00e-04)
accoa	Acetyl-CoA	Acetyl-CoA	Fatty Acid Biosynthesis	Lipid metabolism	0.486035	ACCOACm (9.04e-02, 0.00e+00); ACCOAC (0.00e+00, 6.46e-02); FAS80COA__L (1.29e-02, 9.23e-03)
glygn2	glycogen, structure 2 (glycogenin-1,6-{7[1,4-Glc], 4[1,4-Glc]})	Glycogen, structure 2 (glycogenin-1,6-{7[1,4-Glc], 4[1,4-Glc]})	Starch And Sucrose Metabolism	Starch And Sucrose Metabolism	0.486035	GLBRAN (6.17e-04, 4.41e-04)
arg__L	L-argininium(1+)	Arg	Pseudoreactions	Pseudoreactions	0.486035	EX_arg__L_e (1.40e-02, 1.00e-02)
h	proton	H	Nucleotide Metabolism	Nucleotide metabolism	-0.0149816	ATPM (1.85e+01, 1.85e+01); r0276 (1.06e+00, 1.17e+00); GMPR (1.06e+00, 1.17e+00); CTPS2 (1.29e-02, 9.24e-03); CYTDK1 (5.28e-03, 3.77e-03); ADSS (3.24e-03, 2.32e-03)
glu__L	L-glutamate(1-)	L-Glu	2-oxocarboxylic Acid Metabolism	2-oxocarboxylic Acid Metabolism	0.0737357	PHETA1m (9.96e+00, 9.45e+00); PHETA1 (9.96e+00, 9.45e+00); ILETA (3.73e-02, 4.10e-02); r0450 (6.46e-03, 3.69e-02); ASPTA (3.36e-02, 2.40e-02); VALTA (2.56e-02, 3.26e-02); ALATA__L (2.19e-02, 1.56e-02)
nadp	Nicotinamide adenine dinucleotide phosphate	NADP(+)	Glycine, Serine And Threonine Metabolism	AA central (A/D/E,G/S/T)	-0.0280119	r0553m (2.21e+00, 2.22e+00); r0553 (1.27e+00, 1.32e+00)
ser__L	L-serine	L-ser	Glycine, Serine And Threonine Metabolism	AA central (A/D/E,G/S/T)	-9.79716	PSP__Lm (4.20e-04, 3.74e-01); GHMT2rm (4.20e-04, 3.74e-01)
datp	dATP	dATP	Purine Metabolism	Nitrogen disposal	0.486035	NDPK8 (1.68e-03, 1.20e-03); NDPK8m (8.41e-04, 6.00e-04)
atp	ATP	ATP/ADP	Nucleotide Metabolism	Nucleotide metabolism	0.00505809	ATPM (1.85e+01, 1.85e+01); ADK1 (2.63e-01, 2.20e-01); GK1 (1.86e-02, 1.33e-02); URIDK2 (1.69e-02, 1.21e-02); CTPS2 (1.29e-02, 9.24e-03); R_group_phosphotase_1 (1.27e-02, 9.04e-03); CYTDK1 (5.28e-03, 3.77e-03); NDPK1 (4.11e-03, 2.93e-03); NDPK8 (1.68e-03, 1.20e-03); NDPK3m (1.50e-03, 1.07e-03); CYTK1 (1.21e-03, 8.65e-04); NDPK6m (8.41e-04, 6.00e-04); NDPK8m (8.41e-04, 6.00e-04); NDPK4n (8.41e-04, …
orot	Orotate	Orotate	Pyrimidine Synthesis	Nucleotide metabolism	0.486035	ORPT (3.67e-03, 2.62e-03)
h	proton	H	Glycolysis/Gluconeogenesis	Central Energy Metabolism	-0.00183452	GAPD (9.96e+00, 9.97e+00); PYK (9.96e+00, 9.60e+00); HEX1 (5.00e+00, 5.00e+00); PFK (4.98e+00, 4.99e+00); GCC2cm (6.34e-02, 4.48e-01)
coa	Coenzyme A	CoA	Lysine Metabolism	AA other (Cys/Met/Lys/Arg/Pro)	-2.51396	2OXOADOXm (6.46e-03, 3.69e-02)
o2s	superoxide	Superoxide	Transport, Mitochondrial	Mitochondrial transport	0.0723853	O2Stm (6.54e-02, 6.22e-02)
cmp	CMP	CMP	Glycerophospholipid Metabolism	Lipid metabolism	0.486035	CEPTC (1.16e-02, 8.26e-03); CDIPTr (4.37e-04, 3.12e-04); PGPPTm (1.95e-04, 1.39e-04); CLSm_hs (1.59e-04, 1.13e-04)
atp	ATP	ATP/ADP	Glycolysis/Gluconeogenesis	Central Energy Metabolism	0.0167928	PGK (9.96e+00, 9.97e+00); PYK (9.96e+00, 9.60e+00); HEX1 (5.00e+00, 5.00e+00); PFK (4.98e+00, 4.99e+00)
gmp	GMP	GMP	Nucleotide Salvage Pathway	Nucleotide Salvage Pathway	0.486035	GUAPRT (1.75e-02, 1.25e-02)
Rtotal2coa	R total 2 coenzyme A	R total 2 coenzyme A	Triacylglycerol Synthesis	Lipid metabolism	0.486035	AGPAT1 (1.21e-02, 8.67e-03)
nh4	Ammonium	NH4	Purine Catabolism	Purine Catabolism	-0.14353	r0276 (1.06e+00, 1.17e+00)
nadh	Nicotinamide adenine dinucleotide - reduced	NAD(+)	Glycerophospholipid Metabolism	Lipid metabolism	0.486035	r0202c (6.01e-03, 4.29e-03)
ascb__L	L-ascorbate	L-ascorbate	Ascorbate And Aldarate Metabolism	Ascorbate And Aldarate Metabolism	0.0723853	DASCBR (3.27e-02, 3.11e-02)
pi	hydrogenphosphate	HPO4	Alanine, Aspartate And Glutamate Metabolism	AA central (A/D/E,G/S/T)	-5.11633	PSP__Lm (4.20e-04, 3.74e-01); ASPCTr (3.67e-03, 2.62e-03); r0034 (3.67e-03, 2.62e-03); ADSS (3.24e-03, 2.32e-03)
dtdp	dTDP	dTDP	Pyrimidine Metabolism	Nucleotide metabolism	0.486035	NDPK4n (8.41e-04, 6.00e-04)
h	proton	H	Pyrimidine Synthesis	Nucleotide metabolism	0.486035	CTPS2 (1.29e-02, 9.24e-03); ASPCTr (3.67e-03, 2.62e-03); OMPDC (3.67e-03, 2.62e-03); DHORTS (3.67e-03, 2.62e-03)
hco3	Bicarbonate	HCO3	Glyoxylate And Dicarboxylate Metabolism	Glyoxylate And Dicarboxylate Metabolism	-0.224537	PPCOACm (6.29e-02, 7.35e-02)
phe__L	L-phenylalanine	L-Phe	Pseudoreactions	Pseudoreactions	0.486035	EX_phe__L_e (1.64e-02, 1.17e-02)
o2	O2	O2	Tryptophan Metabolism	AAA metabolism (Trp/Phe/Tyr)	0.486035	KYN3OX (9.43e-03, 6.74e-03); TRPO2 (9.43e-03, 6.74e-03)
coa	Coenzyme A	CoA	Glyoxylate And Dicarboxylate Metabolism	Glyoxylate And Dicarboxylate Metabolism	1.18709	CSm (5.58e-01, 2.11e-01); ACACT1r (6.46e-03, 3.69e-02)
atp	ATP	ATP/ADP	Pyrimidine Synthesis	Nucleotide metabolism	0.486035	CTPS2 (1.29e-02, 9.24e-03)
2pg	D-Glycerate 2-phosphate	D-Glycerate 2-phosphate	Glycine, Serine And Threonine Metabolism	AA central (A/D/E,G/S/T)	0.0534468	PGM (9.96e+00, 9.60e+00)
h2o	Water	H2O	Cyanoamino Acid Metabolism	Cyanoamino Acid Metabolism	-9.79716	GHMT2rm (4.20e-04, 3.74e-01)
coa	Coenzyme A	CoA	2-oxocarboxylic Acid Metabolism	2-oxocarboxylic Acid Metabolism	0.926351	AKGDm (1.13e+00, 7.93e-01); PDHm (6.11e-01, 1.70e-01); CSm (5.58e-01, 2.11e-01); 2OXOADOXm (6.46e-03, 3.69e-02)
dhlam	dihydrolipoamide	Dihydrolipoamide	Valine, Leucine And Isoleucine Biosynthesis	BCAA metabolism (Val/Leu/Iso)	-0.224537	r0604 (3.73e-02, 4.10e-02); r0561 (2.56e-02, 3.26e-02)
co2	carbon dioxide	CO2	Arginine Biosynthesis	AA other (Cys/Met/Lys/Arg/Pro)	0.486035	r0034 (3.67e-03, 2.62e-03)
q10h2	Ubiquinol-10	Ubiquinol-10	Transport, Mitochondrial	Mitochondrial transport	0.486035	DHORD9 (3.67e-03, 2.62e-03)
3mob	3-methyl-2-oxobutanoate	Î±-Ketoisovalerate	Valine, Leucine And Isoleucine Degradation	BCAA metabolism (Val/Leu/Iso)	-0.347877	VALTA (2.56e-02, 3.26e-02)
ru5p__D	D-ribulose 5-phosphate(2-)	D-ribulose 5-phosphate(2-)	Glutathione Metabolism	Redox & Pentose Metabolism	0.486035	GND (8.38e-03, 5.99e-03)
prpp	5-Phospho-alpha-D-ribose 1-diphosphate	5-Phospho-alpha-D-ribose 1-diphosphate	Purine Metabolism	Nitrogen disposal	0.486035	PRPPS (2.59e-02, 1.85e-02); GUAPRT (1.75e-02, 1.25e-02); GLUPRT (4.72e-03, 3.37e-03)
his__L	L-histidine	L-histidine	Biomass And Maintenance Functions	Biomass And Maintenance Functions	0.486035	BIOMASS_maintenance (2.40e-02, 1.72e-02)
ppcoa	Propanoyl-CoA	Propanoyl-CoA	Glyoxylate And Dicarboxylate Metabolism	Glyoxylate And Dicarboxylate Metabolism	-0.224537	PPCOACm (6.29e-02, 7.35e-02)
for	Formate	Formate	Tryptophan Metabolism	AAA metabolism (Trp/Phe/Tyr)	0.486035	FKYNH (9.43e-03, 6.74e-03)
nadph	Nicotinamide adenine dinucleotide phosphate - reduced	NADP(+)	Lysine Metabolism	AA other (Cys/Met/Lys/Arg/Pro)	-2.51396	SACCD3m (6.46e-03, 3.69e-02)
h2o	Water	H2O	Glutathione Metabolism	Redox & Pentose Metabolism	1.1402	r0130 (2.67e-02, 0.00e+00); AMPTASECG (2.33e-02, 1.66e-02); r0129 (2.33e-02, 1.66e-02)
succoa	Succinyl-CoA	Succinyl-CoA	Citric Acid Cycle	Central Energy Metabolism	0.479836	SUCOASm (1.19e+00, 8.66e-01); AKGDm (1.13e+00, 7.93e-01)
pi	hydrogenphosphate	HPO4	Purine Synthesis	Nucleotide metabolism	0.486035	r0666 (4.72e-03, 3.37e-03); PRFGS (4.72e-03, 3.37e-03); PRAGSr (4.72e-03, 3.37e-03); PRASCS (4.72e-03, 3.37e-03)
q10h2	Ubiquinol-10	Ubiquinol-10	Valine, Leucine And Isoleucine Biosynthesis	BCAA metabolism (Val/Leu/Iso)	-0.224537	r0603 (3.73e-02, 4.10e-02); r0560 (2.56e-02, 3.26e-02)
phpyr	keto-phenylpyruvate	Phenylpyruvate	Biosynthesis Of Amino Acids	Biosynthesis Of Amino Acids	0.0761316	PHETA1m (9.96e+00, 9.45e+00); PHETA1 (9.96e+00, 9.45e+00)
gsn	Guanosine	Guanosine	Transport, Mitochondrial	Mitochondrial transport	0.486035	HUMANGEM_MAR05036 (3.53e-04, 2.52e-04)
3hibutcoa	(S)-3-Hydroxyisobutyryl-CoA	(S)-3-Hydroxyisobutyryl-CoA	Valine, Leucine And Isoleucine Biosynthesis	BCAA metabolism (Val/Leu/Iso)	-0.347877	3HBCOAHLm (2.56e-02, 3.26e-02); ECOAH12m (2.56e-02, 3.26e-02)
dutp	dUTP	DUTP	Pyrimidine Metabolism	Nucleotide metabolism	0.486035	NDPK6m (8.41e-04, 6.00e-04)
h	proton	H	Glycerophospholipid Metabolism	Lipid metabolism	0.486035	CHOLK (1.16e-02, 8.26e-03); CEPTC (1.16e-02, 8.26e-03); CHLPCTD (1.16e-02, 8.26e-03); DAGK_hs (1.13e-02, 8.08e-03); GPDDA1 (6.33e-03, 4.52e-03); LPASE (6.33e-03, 4.52e-03); r0202c (6.01e-03, 4.29e-03); PSDm_hs (1.20e-03, 8.58e-04); CDS (7.90e-04, 5.64e-04); CDIPTr (4.37e-04, 3.12e-04); PGPPTm (1.95e-04, 1.39e-04); CLSm_hs (1.59e-04, 1.13e-04)
glyb	glycine betaine	Glycine betaine	Folate Metabolism	Folate Metabolism	-0.0654978	r0552 (1.27e+00, 1.32e+00); r0553 (1.27e+00, 1.32e+00)
cit	Citrate	Citrate	Biosynthesis Of Amino Acids	Biosynthesis Of Amino Acids	1.40307	ACONTm (5.58e-01, 2.11e-01); CSm (5.58e-01, 2.11e-01)
nadp	Nicotinamide adenine dinucleotide phosphate	NADP(+)	Purine Catabolism	Purine Catabolism	-0.14353	r0276 (1.06e+00, 1.17e+00)
ppi	Diphosphate	PPi	Extracellular Transport	Extracellular Transport	0.486035	r1402 (6.17e-04, 4.41e-04)
focytC	Ferrocytochrome C	Ferrocytochrome C	Oxidative Phosphorylation	Oxidative Phosphorylation	0.0723853	CYOR_u10m (6.54e+00, 6.22e+00); CYOOm3 (3.27e+00, 3.11e+00)
g1p	D-Glucose 1-phosphate	D-Glucose 1-phosphate	Glycolysis/Gluconeogenesis	Central Energy Metabolism	0.486035	PGMT (1.85e-03, 1.32e-03)
atp	ATP	ATP/ADP	Glycerophospholipid Metabolism	Lipid metabolism	0.486035	CHOLK (1.16e-02, 8.26e-03); DAGK_hs (1.13e-02, 8.08e-03)
dudp	dUDP	dUDP	Nucleotide Metabolism	Nucleotide metabolism	0.486035	URIDK2 (1.69e-02, 1.21e-02); NDPK6m (8.41e-04, 6.00e-04)
mmcoa_S	(S)-methylmalonyl-CoA(5-)	(S)-methylmalonyl-CoA(5-)	Valine, Leucine And Isoleucine Biosynthesis	BCAA metabolism (Val/Leu/Iso)	-0.224537	PPCOACm (6.29e-02, 7.35e-02); MMEm (6.29e-02, 7.35e-02)
nad	Nicotinamide adenine dinucleotide	NAD(+)	Lysine Degradation	AA other (Cys/Met/Lys/Arg/Pro)	-2.51396	HACD1m (6.46e-03, 3.69e-02); r0525 (6.46e-03, 3.69e-02)
val__L	L-valine	L-Val	Pantothenate And Coa Biosynthesis	Pantothenate And Coa Biosynthesis	-0.347877	VALTA (2.56e-02, 3.26e-02)
co2	carbon dioxide	CO2	Extracellular Transport	Extracellular Transport	-0.761499	CO2t (4.93e-01, 8.35e-01)
g3p	Glyceraldehyde 3-phosphate	G3P	Pentose Phosphate Pathway	Redox & Pentose Metabolism	-0.0013943	FBA (4.98e+00, 4.99e+00)
ile__L	L-isoleucine	L-isoleucine	Biomass And Maintenance Functions	Biomass And Maintenance Functions	0.486035	BIOMASS_maintenance (2.40e-02, 1.72e-02)
adp	ADP	ATP/ADP	Extracellular Transport	Extracellular Transport	0.486035	PCt (6.33e-03, 4.52e-03); PSFLIP (1.20e-03, 8.58e-04); r1402 (6.17e-04, 4.41e-04)
amp	AMP	AMP	Nucleotide Interconversion	Nucleotide metabolism	0.260646	ADK1 (2.63e-01, 2.20e-01); ADSL1 (3.24e-03, 2.32e-03); NTD7 (8.41e-04, 6.00e-04)
ura	uracil	Uracil	Nucleotide Metabolism	Nucleotide metabolism	0.486035	PYNP2r (1.63e-02, 1.16e-02)
dcacoa	Decanoyl-CoA (n-C10:0CoA)	Decanoyl-CoA (n-C10:0CoA)	Fatty Acid Biosynthesis	Lipid metabolism	0.486035	FAS120COA (1.29e-02, 9.23e-03); FAS100COA (1.29e-02, 9.23e-03)
pyr	pyruvate	Pyr	Pseudoreactions	Pseudoreactions	6	EX_pyr_e (1.21e+00, 0.00e+00)
amp	AMP	AMP	Purine Metabolism	Nitrogen disposal	0.279182	ADK1 (2.63e-01, 2.20e-01); PRPPS (2.59e-02, 1.85e-02); ADSL1 (3.24e-03, 2.32e-03); NTD7 (8.41e-04, 6.00e-04)
dump	dUMP	DUMP	Pyrimidine Metabolism	Nucleotide metabolism	0.486035	URIDK2 (1.69e-02, 1.21e-02)
imp	IMP	IMP	Nucleotide Interconversion	Nucleotide metabolism	-0.142677	GMPR (1.06e+00, 1.17e+00); ADSS (3.24e-03, 2.32e-03)
trp__L	L-tryptophan	L-tryptophan	Extracellular Transport	Extracellular Transport	0.486035	TRPt (1.51e-02, 1.08e-02); r1402 (6.17e-04, 4.41e-04)
datp	dATP	dATP	Nucleotide Metabolism	Nucleotide metabolism	0.486035	NDPK8 (1.68e-03, 1.20e-03); NDPK8m (8.41e-04, 6.00e-04)
utp	UTP	UTP	Pyrimidine Metabolism	Nucleotide metabolism	0.486035	CTPS2 (1.29e-02, 9.24e-03)
cbp	Carbamoyl phosphate	Carbamoyl phosphate	Arginine Biosynthesis	AA other (Cys/Met/Lys/Arg/Pro)	0.486035	r0034 (3.67e-03, 2.62e-03)
udp	UDP	UDP	Nucleotide Interconversion	Nucleotide metabolism	0.486035	UMPK2m (1.85e-03, 1.32e-03)
13dpg	3-Phospho-D-glyceroyl phosphate	3-Phospho-D-glyceroyl phosphate	Glycolysis/Gluconeogenesis	Central Energy Metabolism	-0.00164391	PGK (9.96e+00, 9.97e+00); GAPD (9.96e+00, 9.97e+00)
lys__L	L-lysinium(1+)	Lys	Pseudoreactions	Pseudoreactions	-1.01132	EX_lys__L_e (2.48e-02, 5.00e-02)
succoa	Succinyl-CoA	Succinyl-CoA	Glyoxylate And Dicarboxylate Metabolism	Glyoxylate And Dicarboxylate Metabolism	-0.224537	MMMm (6.29e-02, 7.35e-02)
glu__L	L-glutamate(1-)	L-Glu	Extracellular Transport	Extracellular Transport	0.61705	GLUt4 (7.67e-02, 5.00e-02); r1402 (6.17e-04, 4.41e-04)
succoa	Succinyl-CoA	Succinyl-CoA	2-oxocarboxylic Acid Metabolism	2-oxocarboxylic Acid Metabolism	0.505456	AKGDm (1.13e+00, 7.93e-01)
ppi	Diphosphate	PPi	Alanine, Aspartate And Glutamate Metabolism	AA central (A/D/E,G/S/T)	0.486035	GLUPRT (4.72e-03, 3.37e-03)
3pg	3-Phospho-D-glycerate	3-PG	Glycolysis/Gluconeogenesis	Central Energy Metabolism	0.0256379	PGK (9.96e+00, 9.97e+00); PGM (9.96e+00, 9.60e+00)
pi	hydrogenphosphate	HPO4	Biomass And Maintenance Functions	Biomass And Maintenance Functions	0.000535191	ATPM (1.85e+01, 1.85e+01); BIOMASS_maintenance (2.40e-02, 1.72e-02)
2dr1p	2-Deoxy-D-ribose 1-phosphate	2-Deoxy-D-ribose 1-phosphate	Nucleotide Interconversion	Nucleotide metabolism	0.486035	DURIPP (1.63e-02, 1.16e-02)
gln__L	L-glutamine	L-Gln	Arginine Biosynthesis	AA other (Cys/Met/Lys/Arg/Pro)	-0.0325754	GLUNm (4.63e-01, 4.74e-01)
pi	hydrogenphosphate	HPO4	Biosynthesis Of Amino Acids	Biosynthesis Of Amino Acids	1.39472	PCm (5.58e-01, 2.11e-01); r0034 (3.67e-03, 2.62e-03)
met__L	L-methionine	L-Met	Biomass And Maintenance Functions	Biomass And Maintenance Functions	0.486035	BIOMASS_maintenance (2.40e-02, 1.72e-02)
phpyr	keto-phenylpyruvate	Phenylpyruvate	Transport, Mitochondrial	Mitochondrial transport	0.0761316	HUMANGEM_MAR11443 (9.96e+00, 9.45e+00)
clpn_hs	cardiolipin	Cardiolipin	Glycerophospholipid Metabolism	Lipid metabolism	0.486035	CLSm_hs (1.59e-04, 1.13e-04)
co2	carbon dioxide	CO2	Alanine, Aspartate And Glutamate Metabolism	AA central (A/D/E,G/S/T)	-6.52532	GCC2am (4.20e-04, 3.74e-01); r0034 (3.67e-03, 2.62e-03)
gmp	GMP	GMP	Transport, Mitochondrial	Mitochondrial transport	-0.1437	HUMANGEM_MAR20139 (1.06e+00, 1.17e+00)
2dr1p	2-Deoxy-D-ribose 1-phosphate	2-Deoxy-D-ribose 1-phosphate	Purine Metabolism	Nitrogen disposal	0.486035	PUNP4 (1.72e-02, 1.22e-02); PUNP2 (8.41e-04, 6.00e-04)
asn__L	L-asparagine	L-asparagine	Biomass And Maintenance Functions	Biomass And Maintenance Functions	0.486035	BIOMASS_maintenance (2.40e-02, 1.72e-02)
adp	ADP	ATP/ADP	Alanine, Aspartate And Glutamate Metabolism	AA central (A/D/E,G/S/T)	0.486035	r0034 (3.67e-03, 2.62e-03)
uri	Uridine	Uridine	Pyrimidine Metabolism	Nucleotide metabolism	0.486035	PYNP2r (1.63e-02, 1.16e-02); NTD2 (5.52e-03, 3.94e-03)
h2o	Water	H2O	Nucleotide Interconversion	Nucleotide metabolism	0.486035	RNDR2 (1.78e-02, 1.27e-02); NTD8 (1.72e-02, 1.22e-02); r0475 (1.61e-02, 1.15e-02); RNDR3 (1.21e-03, 8.65e-04); NTD7 (8.41e-04, 6.00e-04); DUTPDPm (8.41e-04, 6.00e-04); NTD9m (3.53e-04, 2.52e-04)
h	proton	H	Pseudoreactions	Pseudoreactions	-0.0124792	EX_h_e (1.05e+01, 1.06e+01)
datp	dATP	dATP	Pyrimidine Synthesis	Nucleotide metabolism	0.486035	RE0452M (8.41e-04, 6.00e-04)
cdpchol	CDPcholine	CDPcholine	Glycerophospholipid Metabolism	Lipid metabolism	0.486035	CEPTC (1.16e-02, 8.26e-03); CHLPCTD (1.16e-02, 8.26e-03)
prpp	5-Phospho-alpha-D-ribose 1-diphosphate	5-Phospho-alpha-D-ribose 1-diphosphate	Nucleotide Metabolism	Nucleotide metabolism	0.486035	GUAPRT (1.75e-02, 1.25e-02)
hmgcoa	Hydroxymethylglutaryl-CoA	HMG-CoA	Cholesterol Metabolism	Lipid metabolism	-2.51396	HMGLm (6.46e-03, 3.69e-02)
nadp	Nicotinamide adenine dinucleotide phosphate	NADP(+)	Pyruvate Metabolism	Central Energy Metabolism	1.75653	ME2m (1.16e+00, 3.44e-01)
utp	UTP	UTP	Pentose And Glucuronate Interconversions	Redox & Pentose Metabolism	0.486035	GALU (1.85e-03, 1.32e-03)
h2o	Water	H2O	Purine Metabolism	Nitrogen disposal	0.000715917	ATPM (1.85e+01, 1.85e+01); NTD8 (1.72e-02, 1.22e-02); PRFGS (4.72e-03, 3.37e-03); GLUPRT (4.72e-03, 3.37e-03); IMPC (4.72e-03, 3.37e-03); NTD7 (8.41e-04, 6.00e-04)
gln__L	L-glutamine	L-Gln	Extracellular Transport	Extracellular Transport	0.000140239	GLNtN1 (4.83e-01, 5.00e-01); CYSGLUexR (1.70e-02, 0.00e+00); r1402 (6.17e-04, 4.41e-04)
co2	carbon dioxide	CO2	Purine Synthesis	Nucleotide metabolism	0.486035	AIRCr (4.72e-03, 3.37e-03)
ppi	Diphosphate	PPi	Nucleotide Salvage Pathway	Nucleotide Salvage Pathway	0.486035	GUAPRT (1.75e-02, 1.25e-02)
cbp	Carbamoyl phosphate	Carbamoyl phosphate	Urea Cycle	Nitrogen disposal	0.486035	r0034 (3.67e-03, 2.62e-03)
glu__L	L-glutamate(1-)	L-Glu	Phenylalanine, Tyrosine And Tryptophan Biosynthesis	AAA metabolism (Trp/Phe/Tyr)	0.0761316	PHETA1m (9.96e+00, 9.45e+00); PHETA1 (9.96e+00, 9.45e+00)
5aizc	5-amino-1-(5-phospho-D-ribosyl)imidazole-4-carboxylate	5-Amino-1-(5-phospho-D-ribosyl)imidAzole-4-carboxylate	Purine Synthesis	Nucleotide metabolism	0.486035	PRASCS (4.72e-03, 3.37e-03); AIRCr (4.72e-03, 3.37e-03)
C02470	Xanthurenic acid	Xanthurenic acid	Extracellular Transport	Extracellular Transport	0.486035	r1030 (9.43e-03, 6.74e-03)
pro__L	L-proline	L-Pro	Arginine And Proline Metabolism	AA other (Cys/Met/Lys/Arg/Pro)	-6	PRO1xm (0.00e+00, 3.84e-02)
Lfmkynr	N-formyl-L-kynurenine	N-formyl-L-kynurenine	Tryptophan Metabolism	AAA metabolism (Trp/Phe/Tyr)	0.486035	TRPO2 (9.43e-03, 6.74e-03); FKYNH (9.43e-03, 6.74e-03)
nadp	Nicotinamide adenine dinucleotide phosphate	NADP(+)	Fatty Acid Biosynthesis	Lipid metabolism	0.486035	FAS140COA (1.29e-02, 9.23e-03); FAS100COA (1.29e-02, 9.23e-03); FAS120COA (1.29e-02, 9.23e-03); FAS160COA (1.29e-02, 9.23e-03); FAS80COA__L (1.29e-02, 9.23e-03)
ser__L	L-serine	L-ser	Biomass And Maintenance Functions	Biomass And Maintenance Functions	0.486035	BIOMASS_maintenance (2.40e-02, 1.72e-02)
pram	5-Phospho-beta-D-ribosylamine	5-Phospho-beta-D-ribosylamine	Alanine, Aspartate And Glutamate Metabolism	AA central (A/D/E,G/S/T)	0.486035	GLUPRT (4.72e-03, 3.37e-03)
2oxoadp	2-oxoadipate(2-)	Adipates	Lysine Degradation	AA other (Cys/Met/Lys/Arg/Pro)	-2.51396	r0450 (6.46e-03, 3.69e-02)
3php	3-phosphonatooxypyruvate(3-)	3-PHP	Glycine, Serine And Threonine Metabolism	AA central (A/D/E,G/S/T)	-9.79716	PGCD (4.20e-04, 3.74e-01); PSERT (4.20e-04, 3.74e-01)
mal__L	(S)-malate(2-)	(S)-malate(2-)	Methane Metabolism	Methane Metabolism	-3.9597	MDH (3.39e-02, 5.28e-01)
2mbcoa	2-methylbutanoyl-CoA(4-)	2-Methylbutanoyl-CoA(4-)	Valine, Leucine And Isoleucine Biosynthesis	BCAA metabolism (Val/Leu/Iso)	-0.133464	r0603 (3.73e-02, 4.10e-02); r0604 (3.73e-02, 4.10e-02)
nadh	Nicotinamide adenine dinucleotide - reduced	NAD(+)	Cysteine And Methionine Metabolism	AA other (Cys/Met/Lys/Arg/Pro)	-9.79716	PGCD (4.20e-04, 3.74e-01)
prpp	5-Phospho-alpha-D-ribose 1-diphosphate	5-Phospho-alpha-D-ribose 1-diphosphate	Pyrimidine Synthesis	Nucleotide metabolism	0.486035	ORPT (3.67e-03, 2.62e-03)
gsn	Guanosine	Guanosine	Purine Metabolism	Nitrogen disposal	0.486035	PUNP3 (3.53e-04, 2.52e-04)
pser__L	O-Phospho-L-serine	O-Phospho-L-serine	Cysteine And Methionine Metabolism	AA other (Cys/Met/Lys/Arg/Pro)	-9.79716	PSERT (4.20e-04, 3.74e-01)
pi	hydrogenphosphate	HPO4	Transport, Mitochondrial	Mitochondrial transport	0.053841	MALtm (1.00e+01, 9.64e+00); HUMANGEM_MAR08651 (3.67e-03, 2.62e-03)
glutcoa	glutaryl-CoA(5-)	Glutaryl-CoA	Tryptophan Metabolism	AAA metabolism (Trp/Phe/Tyr)	-2.51396	r0541 (6.46e-03, 3.69e-02); 2OXOADOXm (6.46e-03, 3.69e-02)
h	proton	H	Glycine, Serine And Threonine Metabolism	AA central (A/D/E,G/S/T)	-0.172532	r0552m (2.21e+00, 2.22e+00); r0553m (2.21e+00, 2.22e+00); r0553 (1.27e+00, 1.32e+00); r0552 (1.27e+00, 1.32e+00); PGCD (4.20e-04, 3.74e-01); GCC2am (4.20e-04, 3.74e-01)
dag_hs	diglyceride	Diglyceride	Glycerophospholipid Metabolism	Lipid metabolism	0.486035	CEPTC (1.16e-02, 8.26e-03); DAGK_hs (1.13e-02, 8.08e-03)
glu__L	L-glutamate(1-)	L-Glu	Lysine Degradation	AA other (Cys/Met/Lys/Arg/Pro)	-2.51396	r0450 (6.46e-03, 3.69e-02); r0525 (6.46e-03, 3.69e-02)
6pgc	6-Phospho-D-gluconate	6-Phospho-D-gluconate	Pentose Phosphate Pathway	Redox & Pentose Metabolism	0.486035	GND (8.38e-03, 5.99e-03); PGL (8.38e-03, 5.99e-03)
amp	AMP	AMP	Nucleotide Metabolism	Nucleotide metabolism	0.270108	ADK1 (2.63e-01, 2.20e-01); R_group_phosphotase_1 (1.27e-02, 9.04e-03); ADSL1 (3.24e-03, 2.32e-03); NTD7 (8.41e-04, 6.00e-04)
asp__L	L-aspartate(1-)	L-aspartate(1-)	Biomass And Maintenance Functions	Biomass And Maintenance Functions	0.486035	BIOMASS_maintenance (2.40e-02, 1.72e-02)
pro__L	L-proline	L-Pro	Extracellular Transport	Extracellular Transport	-1.59566	PROt4 (1.63e-02, 5.00e-02); r1402 (6.17e-04, 4.41e-04)
gln__L	L-glutamine	L-Gln	Alanine, Aspartate And Glutamate Metabolism	AA central (A/D/E,G/S/T)	-0.0281768	GLUNm (4.63e-01, 4.74e-01); GLUPRT (4.72e-03, 3.37e-03)
pram	5-Phospho-beta-D-ribosylamine	5-Phospho-beta-D-ribosylamine	Purine Synthesis	Nucleotide metabolism	0.486035	GLUPRT (4.72e-03, 3.37e-03); PRAGSr (4.72e-03, 3.37e-03)
dgtp	dGTP	dGTP	Biomass And Maintenance Functions	Biomass And Maintenance Functions	0.486035	BIOMASS_maintenance (2.40e-02, 1.72e-02)
25aics	(S)-2-[5-Amino-1-(5-phospho-D-ribosyl)imidazole-4-carboxamido]succinate	(S)-2-[5-Amino-1-(5-phospho-D-ribosyl)imidAzole-4-carboxamido]succinate	Purine Metabolism	Nitrogen disposal	0.486035	PRASCS (4.72e-03, 3.37e-03); ADSL2 (4.72e-03, 3.37e-03)
cys__L	L-cysteine	L-Cys	Biomass And Maintenance Functions	Biomass And Maintenance Functions	0.486035	BIOMASS_maintenance (2.40e-02, 1.72e-02)
hco3	Bicarbonate	HCO3	Fatty Acid Degradation	Lipid metabolism	0.486035	ACCOACm (9.04e-02, 0.00e+00); ACCOAC (0.00e+00, 6.46e-02)
co2	carbon dioxide	CO2	Tryptophan Metabolism	AAA metabolism (Trp/Phe/Tyr)	-2.51396	2OXOADOXm (6.46e-03, 3.69e-02); r0541 (6.46e-03, 3.69e-02)
didp	dIDP	DIDP	Transport, Nuclear	Transport, Nuclear	0.486035	DIDPtn (8.41e-04, 6.00e-04)
nad	Nicotinamide adenine dinucleotide	NAD(+)	Sphingolipid Metabolism	Lipid metabolism	0.486035	RE2675C (5.14e-04, 3.67e-04)
co2	carbon dioxide	CO2	Biosynthesis Of Amino Acids	Biosynthesis Of Amino Acids	1.39472	ICDHxm (5.58e-01, 2.11e-01); r0034 (3.67e-03, 2.62e-03)
pmtcoa	Palmitoyl-CoA (n-C16:0CoA)	Palmitoyl-CoA (n-C16:0CoA)	Fatty Acid Biosynthesis	Lipid metabolism	0.486035	FAS160COA (1.29e-02, 9.23e-03); ARTPLM2 (1.21e-02, 8.67e-03); ARTPLM3 (2.60e-04, 1.86e-04)
q10	ubiquinone-10	Ubiquinone-10	Oxidative Phosphorylation	Oxidative Phosphorylation	0.0443934	CYOR_u10m (6.54e+00, 6.22e+00); NADH2_u10m (5.28e+00, 5.24e+00)
Rtotalcoa	R total Coenzyme A	R total Coenzyme A	Nucleotide Metabolism	Nucleotide metabolism	0.486035	R_group_phosphotase_1 (1.27e-02, 9.04e-03)
adp	ADP	ATP/ADP	Biomass And Maintenance Functions	Biomass And Maintenance Functions	0.000535191	ATPM (1.85e+01, 1.85e+01); BIOMASS_maintenance (2.40e-02, 1.72e-02)
2dr1p	2-Deoxy-D-ribose 1-phosphate	2-Deoxy-D-ribose 1-phosphate	Nucleotide Metabolism	Nucleotide metabolism	0.486035	PUNP4 (1.72e-02, 1.22e-02); PUNP2 (8.41e-04, 6.00e-04)
akg	2-Oxoglutarate	Î±-KG	Nitrogen Metabolism	Nitrogen disposal	0.889128	GLUDxm (5.97e-01, 3.22e-01)
fdp	D-Fructose 1,6-bisphosphate	F1,6BP	Pentose Phosphate Pathway	Redox & Pentose Metabolism	-0.0013943	FBA (4.98e+00, 4.99e+00)
trp__L	L-tryptophan	L-tryptophan	Tryptophan Metabolism	AAA metabolism (Trp/Phe/Tyr)	0.486035	TRPO2 (9.43e-03, 6.74e-03)
gln__L	L-glutamine	L-Gln	Purine Synthesis	Nucleotide metabolism	0.486035	PRFGS (4.72e-03, 3.37e-03); GLUPRT (4.72e-03, 3.37e-03)
gdp	GDP	GDP	Nucleotide Interconversion	Nucleotide metabolism	0.486035	GK1 (1.86e-02, 1.33e-02); RNDR2 (1.78e-02, 1.27e-02); NDPK1 (4.11e-03, 2.93e-03); ADSS (3.24e-03, 2.32e-03)
trp__L	L-tryptophan	L-tryptophan	Biomass And Maintenance Functions	Biomass And Maintenance Functions	0.486035	BIOMASS_maintenance (2.40e-02, 1.72e-02)
lac__L	(S)-lactate	(S)-lactate	Pyruvate Metabolism	Central Energy Metabolism	-0.129935	LDH__L (8.72e+00, 9.55e+00)
ser__L	L-serine	L-ser	Cyanoamino Acid Metabolism	Cyanoamino Acid Metabolism	-9.79716	GHMT2rm (4.20e-04, 3.74e-01)
gua	Guanine	Guanine	Purine Catabolism	Purine Catabolism	0.486035	PUNP4 (1.72e-02, 1.22e-02); PUNP3 (3.53e-04, 2.52e-04)
nadp	Nicotinamide adenine dinucleotide phosphate	NADP(+)	Sphingolipid Metabolism	Lipid metabolism	0.486035	3DSPHR (5.14e-04, 3.67e-04)
malcoa	Malonyl-CoA	Malonyl-CoA	Fatty Acid Degradation	Lipid metabolism	0.486035	ACCOACm (9.04e-02, 0.00e+00); ACCOAC (0.00e+00, 6.46e-02)
h2o	Water	H2O	Nucleotide Metabolism	Nucleotide metabolism	0.00081184	ATPM (1.85e+01, 1.85e+01); NTD8 (1.72e-02, 1.22e-02); CTPS2 (1.29e-02, 9.24e-03); NTD2 (5.52e-03, 3.94e-03); NTD7 (8.41e-04, 6.00e-04)
gmp	GMP	GMP	Purine Metabolism	Nitrogen disposal	-0.135275	r0276 (1.06e+00, 1.17e+00); GMPR (1.06e+00, 1.17e+00); GK1 (1.86e-02, 1.33e-02); GUAPRT (1.75e-02, 1.25e-02)
ser__L	L-serine	L-ser	Sphingolipid Metabolism	Lipid metabolism	0.486035	SERPT (5.14e-04, 3.67e-04)
lys__L	L-lysinium(1+)	Lys	Transport, Endosomal	Transport, Endosomal	-0.62819	LYSt5r (3.88e-02, 6.00e-02)
glu__L	L-glutamate(1-)	L-Glu	Biomass And Maintenance Functions	Biomass And Maintenance Functions	0.486035	BIOMASS_maintenance (2.40e-02, 1.72e-02)
h	proton	H	Purine Catabolism	Purine Catabolism	-0.14353	r0276 (1.06e+00, 1.17e+00)
h2o	Water	H2O	Glycolysis/Gluconeogenesis	Central Energy Metabolism	0.0534468	ENO (9.96e+00, 9.60e+00)
hco3	Bicarbonate	HCO3	Propanoate Metabolism	Propanoate Metabolism	0.151288	ACCOACm (9.04e-02, 0.00e+00); PPCOACm (6.29e-02, 7.35e-02); ACCOAC (0.00e+00, 6.46e-02)
val__L	L-valine	L-Val	Pseudoreactions	Pseudoreactions	0	EX_val__L_e (5.00e-02, 5.00e-02)
nadh	Nicotinamide adenine dinucleotide - reduced	NAD(+)	Methane Metabolism	Methane Metabolism	-4.71456	MDH (3.39e-02, 5.28e-01); PGCD (4.20e-04, 3.74e-01)
coa	Coenzyme A	CoA	Synthesis And Degradation Of Ketone Bodies	Lipid metabolism	-2.51396	HMGCOASim (6.46e-03, 3.69e-02)
hco3	Bicarbonate	HCO3	Pyruvate Metabolism	Central Energy Metabolism	1.23453	PCm (5.58e-01, 2.11e-01); ACCOACm (9.04e-02, 0.00e+00); ACCOAC (0.00e+00, 6.46e-02)
pser__L	O-Phospho-L-serine	O-Phospho-L-serine	Methane Metabolism	Methane Metabolism	-9.79716	PSERT (4.20e-04, 3.74e-01)
ppi	Diphosphate	PPi	Transport, Mitochondrial	Mitochondrial transport	0.269197	PPItm (2.75e-01, 2.29e-01); HUMANGEM_MAR08651 (3.67e-03, 2.62e-03)
adn	Adenosine	Ado	Nucleotide Interconversion	Nucleotide metabolism	0.486035	NTD7 (8.41e-04, 6.00e-04); PUNP1 (8.41e-04, 6.00e-04)
h	proton	H	Fatty Acid Degradation	Lipid metabolism	-0.0665056	ACCOACm (9.04e-02, 0.00e+00); ACCOAC (0.00e+00, 6.46e-02); HACD1m (6.46e-03, 3.69e-02)
gsn	Guanosine	Guanosine	Nucleotide Metabolism	Nucleotide metabolism	0.486035	PUNP3 (3.53e-04, 2.52e-04)
co2	carbon dioxide	CO2	Transport, Mitochondrial	Mitochondrial transport	0.167568	CO2tm (2.84e+00, 2.53e+00)
h	proton	H	Transport, Endosomal	Transport, Endosomal	-0.129935	L__LACt2r (8.72e+00, 9.55e+00)
atp	ATP	ATP/ADP	Fatty Acid Degradation	Lipid metabolism	0.486035	ACCOACm (9.04e-02, 0.00e+00); ACCOAC (0.00e+00, 6.46e-02)
pglyc_hs	phosphatidylglycerol(1-)	Phosphatidylglycerol(1-)	Biomass And Maintenance Functions	Biomass And Maintenance Functions	0.486035	BIOMASS_maintenance (2.40e-02, 1.72e-02)
h2o	Water	H2O	Pyrimidine Synthesis	Nucleotide metabolism	0.486035	CTPS2 (1.29e-02, 9.24e-03); DHORTS (3.67e-03, 2.62e-03)
accoa	Acetyl-CoA	Acetyl-CoA	Glycolysis/Gluconeogenesis	Central Energy Metabolism	1.84576	PDHm (6.11e-01, 1.70e-01)
nadph	Nicotinamide adenine dinucleotide phosphate - reduced	NADP(+)	Lysine Degradation	AA other (Cys/Met/Lys/Arg/Pro)	-2.51396	SACCD3m (6.46e-03, 3.69e-02)
nh4	Ammonium	NH4	Nucleotide Interconversion	Nucleotide metabolism	-0.144242	GMPR (1.06e+00, 1.17e+00)
adp	ADP	ATP/ADP	Transport, Mitochondrial	Mitochondrial transport	0.011554	ATPtm (1.06e+01, 1.05e+01)
Rtotal3coa	R total 3 Coenzyme A	R total 3 Coenzyme A	Triacylglycerol Synthesis	Lipid metabolism	0.486035	DGAT (2.60e-04, 1.86e-04)
cholp	choline phosphate(1-)	Choline phosphate(1-)	Glycerophospholipid Metabolism	Lipid metabolism	0.486035	CHOLK (1.16e-02, 8.26e-03); CHLPCTD (1.16e-02, 8.26e-03)
gua	Guanine	Guanine	Nucleotide Salvage Pathway	Nucleotide Salvage Pathway	0.486035	GUAPRT (1.75e-02, 1.25e-02)
malcoa	Malonyl-CoA	Malonyl-CoA	Propanoate Metabolism	Propanoate Metabolism	0.486035	ACCOACm (9.04e-02, 0.00e+00); ACCOAC (0.00e+00, 6.46e-02)
cdpdag_hs	CDP-diacylglycerol(2-)	CDP-diacylglycerol(2-)	Glycerophospholipid Metabolism	Lipid metabolism	0.486035	CDS (7.90e-04, 5.64e-04); CDIPTr (4.37e-04, 3.12e-04); PGPPTm (1.95e-04, 1.39e-04); CLSm_hs (1.59e-04, 1.13e-04)
nh4	Ammonium	NH4	Nitrogen Metabolism	Nitrogen disposal	0.886291	GLUDxm (5.97e-01, 3.22e-01); r0034 (3.67e-03, 2.62e-03)
hco3	Bicarbonate	HCO3	Fatty Acid Biosynthesis	Lipid metabolism	0.486035	ACCOACm (9.04e-02, 0.00e+00); ACCOAC (0.00e+00, 6.46e-02)
accoa	Acetyl-CoA	Acetyl-CoA	Valine, Leucine And Isoleucine Degradation	BCAA metabolism (Val/Leu/Iso)	-1.41886	ACACT10m (3.73e-02, 4.10e-02); HMGLm (6.46e-03, 3.69e-02); HMGCOASim (6.46e-03, 3.69e-02); ACACT1r (6.46e-03, 3.69e-02)
pmtcoa	Palmitoyl-CoA (n-C16:0CoA)	Palmitoyl-CoA (n-C16:0CoA)	Sphingolipid Metabolism	Lipid metabolism	0.486035	SERPT (5.14e-04, 3.67e-04)
gln__L	L-glutamine	L-Gln	Biomass And Maintenance Functions	Biomass And Maintenance Functions	0.486035	BIOMASS_maintenance (2.40e-02, 1.72e-02)
air	5-amino-1-(5-phospho-D-ribosyl)imidazole	5-Amino-1-(5-phospho-D-ribosyl)imidAzole	Purine Synthesis	Nucleotide metabolism	0.486035	r0666 (4.72e-03, 3.37e-03); AIRCr (4.72e-03, 3.37e-03)
co2	carbon dioxide	CO2	Valine, Leucine And Isoleucine Biosynthesis	BCAA metabolism (Val/Leu/Iso)	-0.261291	r0670 (3.73e-02, 4.10e-02); MMSAD1m (2.56e-02, 3.26e-02); r0385 (2.56e-02, 3.26e-02)
coa	Coenzyme A	CoA	Biosynthesis Of Amino Acids	Biosynthesis Of Amino Acids	1.40307	CSm (5.58e-01, 2.11e-01)
pi	hydrogenphosphate	HPO4	Purine Metabolism	Nitrogen disposal	0.00121426	ATPM (1.85e+01, 1.85e+01); PUNP4 (1.72e-02, 1.22e-02); NTD8 (1.72e-02, 1.22e-02); PRFGS (4.72e-03, 3.37e-03); PRAGSr (4.72e-03, 3.37e-03); PRASCS (4.72e-03, 3.37e-03); ADSS (3.24e-03, 2.32e-03); NTD7 (8.41e-04, 6.00e-04); PUNP2 (8.41e-04, 6.00e-04); PUNP1 (8.41e-04, 6.00e-04); PUNP3 (3.53e-04, 2.52e-04)
C02470	Xanthurenic acid	Xanthurenic acid	Tryptophan Metabolism	AAA metabolism (Trp/Phe/Tyr)	0.486035	r0647 (9.43e-03, 6.74e-03)
fgam	N2-Formyl-N1-(5-phospho-D-ribosyl)glycinamide	N2-Formyl-N1-(5-phospho-D-ribosyl)glycinamide	Purine Metabolism	Nitrogen disposal	0.486035	GARFT (4.72e-03, 3.37e-03); PRFGS (4.72e-03, 3.37e-03)
q10h2	Ubiquinol-10	Ubiquinol-10	Citric Acid Cycle	Central Energy Metabolism	0.455985	r0509 (1.19e+00, 8.66e-01)
co2	carbon dioxide	CO2	Glutathione Metabolism	Redox & Pentose Metabolism	0.486035	GND (8.38e-03, 5.99e-03)
fum	Fumarate	Fumarate	Citric Acid Cycle	Central Energy Metabolism	0.119906	FUMm (1.38e+01, 1.27e+01); FUM (1.26e+01, 1.18e+01); r0509 (1.19e+00, 8.66e-01)
lpam	lipoamide	Lipoamide	Glycine, Serine And Threonine Metabolism	AA central (A/D/E,G/S/T)	-9.79716	GCC2am (4.20e-04, 3.74e-01)
glu__L	L-glutamate(1-)	L-Glu	Transport, Mitochondrial	Mitochondrial transport	0.134349	GLUt2m (1.01e+01, 9.19e+00)
h	proton	H	Propanoate Metabolism	Propanoate Metabolism	0.151288	ACCOACm (9.04e-02, 0.00e+00); PPCOACm (6.29e-02, 7.35e-02); ACCOAC (0.00e+00, 6.46e-02)
h2o	Water	H2O	Glycerophospholipid Metabolism	Lipid metabolism	0.486035	GPDDA1 (6.33e-03, 4.52e-03); LPASE (6.33e-03, 4.52e-03); PGPP_hs (1.95e-04, 1.39e-04)
oaa	Oxaloacetate	Oxaloacetate	Pseudoreactions	Pseudoreactions	-10.3626	EX_oaa_e (3.83e-04, 5.04e-01)
3hbcoa	(S)-3-hydroxybutanoyl-CoA(4-)	SC acyl-CoA	Fatty Acid Degradation	Lipid metabolism	-2.51396	HACD1m (6.46e-03, 3.69e-02); ECOAH1m (6.46e-03, 3.69e-02)
atp	ATP	ATP/ADP	Propanoate Metabolism	Propanoate Metabolism	0.417712	SUCOASm (1.19e+00, 8.66e-01); ACCOACm (9.04e-02, 0.00e+00); PPCOACm (6.29e-02, 7.35e-02); ACCOAC (0.00e+00, 6.46e-02)
3mob	3-methyl-2-oxobutanoate	Î±-Ketoisovalerate	Biosynthesis Of Amino Acids	Biosynthesis Of Amino Acids	-0.347877	VALTA (2.56e-02, 3.26e-02)
h	proton	H	Pyruvate Metabolism	Central Energy Metabolism	-0.0426567	PYK (9.96e+00, 9.60e+00); LDH__L (8.72e+00, 9.55e+00); PCm (5.58e-01, 2.11e-01); MDH (3.39e-02, 5.28e-01); ACCOACm (9.04e-02, 0.00e+00); ACCOAC (0.00e+00, 6.46e-02)
cytd	Cytidine	Cytidine	Pyrimidine Metabolism	Nucleotide metabolism	0.486035	CYTDK1 (5.28e-03, 3.77e-03)
3pg	3-Phospho-D-glycerate	3-PG	Cysteine And Methionine Metabolism	AA other (Cys/Met/Lys/Arg/Pro)	-9.79716	PGCD (4.20e-04, 3.74e-01)
3hibutcoa	(S)-3-Hydroxyisobutyryl-CoA	(S)-3-Hydroxyisobutyryl-CoA	Valine, Leucine And Isoleucine Degradation	BCAA metabolism (Val/Leu/Iso)	-0.347877	3HBCOAHLm (2.56e-02, 3.26e-02); ECOAH12m (2.56e-02, 3.26e-02)
atp	ATP	ATP/ADP	Pyruvate Metabolism	Central Energy Metabolism	0.103593	PYK (9.96e+00, 9.60e+00); PCm (5.58e-01, 2.11e-01); ACCOACm (9.04e-02, 0.00e+00); ACCOAC (0.00e+00, 6.46e-02)
nadp	Nicotinamide adenine dinucleotide phosphate	NADP(+)	Nucleotide Interconversion	Nucleotide metabolism	-0.142845	GMPR (1.06e+00, 1.17e+00); TRDR (2.89e-03, 2.07e-03)
fgam	N2-Formyl-N1-(5-phospho-D-ribosyl)glycinamide	N2-Formyl-N1-(5-phospho-D-ribosyl)glycinamide	Folate Metabolism	Folate Metabolism	0.486035	GARFT (4.72e-03, 3.37e-03)
pro__L	L-proline	L-Pro	Biosynthesis Of Amino Acids	Biosynthesis Of Amino Acids	-6	PRO1xm (0.00e+00, 3.84e-02)
pglyc_hs	phosphatidylglycerol(1-)	Phosphatidylglycerol(1-)	Transport, Mitochondrial	Mitochondrial transport	0.486035	HUMANGEM_MAR11371 (1.59e-04, 1.13e-04)
pail_hs	1-phosphatidyl-1D-myo-inositol(1-)	1-Phosphatidyl-1D-myo-inositol(1-)	Biomass And Maintenance Functions	Biomass And Maintenance Functions	0.486035	BIOMASS_maintenance (2.40e-02, 1.72e-02)
glu__L	L-glutamate(1-)	L-Glu	Glutathione Metabolism	Redox & Pentose Metabolism	1.58863	r0130 (2.67e-02, 0.00e+00); r0129 (2.33e-02, 1.66e-02)
gmp	GMP	GMP	Nucleotide Metabolism	Nucleotide metabolism	-0.135275	r0276 (1.06e+00, 1.17e+00); GMPR (1.06e+00, 1.17e+00); GK1 (1.86e-02, 1.33e-02); GUAPRT (1.75e-02, 1.25e-02)
gdp	GDP	GDP	Nucleotide Metabolism	Nucleotide metabolism	0.486035	GK1 (1.86e-02, 1.33e-02); NDPK1 (4.11e-03, 2.93e-03); ADSS (3.24e-03, 2.32e-03)
cbasp	N-Carbamoyl-L-aspartate	N-Carbamoyl-L-aspartate	Pyrimidine Metabolism	Nucleotide metabolism	0.486035	ASPCTr (3.67e-03, 2.62e-03)
h	proton	H	Fatty Acid Biosynthesis	Lipid metabolism	0.486035	ACCOACm (9.04e-02, 0.00e+00); ACCOAC (0.00e+00, 6.46e-02); FAS160COA (1.29e-02, 9.23e-03); FAS120COA (1.29e-02, 9.23e-03); FAS140COA (1.29e-02, 9.23e-03); FAS100COA (1.29e-02, 9.23e-03); FAS80COA__L (1.29e-02, 9.23e-03)
alpa_hs	lysophosphatidic acid	Lysophosphatidic acid	Triacylglycerol Synthesis	Lipid metabolism	0.486035	GPAM_hs (1.21e-02, 8.67e-03); AGPAT1 (1.21e-02, 8.67e-03)
gln__L	L-glutamine	L-Gln	Transport, Mitochondrial	Mitochondrial transport	-0.0325754	GLNtm (4.63e-01, 4.74e-01)
aacoa	Acetoacetyl-CoA	Acetoacetyl-CoA	Terpenoid Backbone Biosynthesis	Terpenoid Backbone Biosynthesis	-2.51396	ACACT1r (6.46e-03, 3.69e-02); HMGCOASim (6.46e-03, 3.69e-02)
coa	Coenzyme A	CoA	Transport, Mitochondrial	Mitochondrial transport	6	COAtim (9.04e-02, 0.00e+00)
fprica	5-Formamido-1-(5-phospho-D-ribosyl)imidazole-4-carboxamide	5-Formamido-1-(5-phospho-D-ribosyl)imidAzole-4-carboxamide	Purine Metabolism	Nitrogen disposal	0.486035	AICART (4.72e-03, 3.37e-03); IMPC (4.72e-03, 3.37e-03)
atp	ATP	ATP/ADP	Fatty Acid Biosynthesis	Lipid metabolism	0.486035	ACCOACm (9.04e-02, 0.00e+00); ACCOAC (0.00e+00, 6.46e-02)
tag_hs	triglyceride	Triglyceride	Biomass And Maintenance Functions	Biomass And Maintenance Functions	0.486035	BIOMASS_maintenance (2.40e-02, 1.72e-02)
asp__L	L-aspartate(1-)	L-aspartate(1-)	Nucleotide Interconversion	Nucleotide metabolism	0.486035	ADSS (3.24e-03, 2.32e-03)
mmcoa_S	(S)-methylmalonyl-CoA(5-)	(S)-methylmalonyl-CoA(5-)	Glyoxylate And Dicarboxylate Metabolism	Glyoxylate And Dicarboxylate Metabolism	-0.224537	PPCOACm (6.29e-02, 7.35e-02); MMEm (6.29e-02, 7.35e-02)
asp__L	L-aspartate(1-)	L-aspartate(1-)	Purine Metabolism	Nitrogen disposal	0.486035	PRASCS (4.72e-03, 3.37e-03); ADSS (3.24e-03, 2.32e-03)
adn	Adenosine	Ado	Nucleotide Metabolism	Nucleotide metabolism	0.486035	NTD7 (8.41e-04, 6.00e-04); PUNP1 (8.41e-04, 6.00e-04)
nadp	Nicotinamide adenine dinucleotide phosphate	NADP(+)	Pentose Phosphate Pathway	Redox & Pentose Metabolism	0.486035	GND (8.38e-03, 5.99e-03); G6PDH2r (8.38e-03, 5.99e-03)
nadp	Nicotinamide adenine dinucleotide phosphate	NADP(+)	Folate Metabolism	Folate Metabolism	-0.710729	r0553 (1.27e+00, 1.32e+00); FTHFDHm (0.00e+00, 7.47e-01); r0226 (8.41e-04, 6.00e-04)
dgtp	dGTP	dGTP	Purine Metabolism	Nitrogen disposal	0.486035	NDPK5 (6.06e-04, 4.33e-04)
ser__L	L-serine	L-ser	Folate Metabolism	Folate Metabolism	-9.79716	GHMT2rm (4.20e-04, 3.74e-01)
ppi	Diphosphate	PPi	Purine Metabolism	Nitrogen disposal	0.486035	GUAPRT (1.75e-02, 1.25e-02); GLUPRT (4.72e-03, 3.37e-03)
cmp	CMP	CMP	Pyrimidine Metabolism	Nucleotide metabolism	0.486035	CYTDK1 (5.28e-03, 3.77e-03); CYTK1 (1.21e-03, 8.65e-04); CYTK1m (3.53e-04, 2.52e-04)
cit	Citrate	Citrate	Citric Acid Cycle	Central Energy Metabolism	1.40307	ACONTm (5.58e-01, 2.11e-01); CSm (5.58e-01, 2.11e-01)
chsterol	cholesterol	Cholesterol	Pseudoreactions	Pseudoreactions	0.486035	EX_chsterol_e (4.90e-04, 3.50e-04)
Rtotal	R total	R total	Nucleotide Metabolism	Nucleotide metabolism	0.486035	R_group_phosphotase_1 (1.27e-02, 9.04e-03)
co2	carbon dioxide	CO2	Purine Metabolism	Nitrogen disposal	0.486035	AIRCr (4.72e-03, 3.37e-03)
pi	hydrogenphosphate	HPO4	Nucleotide Metabolism	Nucleotide metabolism	0.00167161	ATPM (1.85e+01, 1.85e+01); PUNP4 (1.72e-02, 1.22e-02); NTD8 (1.72e-02, 1.22e-02); PYNP2r (1.63e-02, 1.16e-02); CTPS2 (1.29e-02, 9.24e-03); NTD2 (5.52e-03, 3.94e-03); ADSS (3.24e-03, 2.32e-03); NTD7 (8.41e-04, 6.00e-04); PUNP2 (8.41e-04, 6.00e-04); PUNP1 (8.41e-04, 6.00e-04); PUNP3 (3.53e-04, 2.52e-04)
pro__L	L-proline	L-Pro	Transport, Mitochondrial	Mitochondrial transport	-6	PROtm (0.00e+00, 3.84e-02)
5aizc	5-amino-1-(5-phospho-D-ribosyl)imidazole-4-carboxylate	5-Amino-1-(5-phospho-D-ribosyl)imidAzole-4-carboxylate	Purine Metabolism	Nitrogen disposal	0.486035	PRASCS (4.72e-03, 3.37e-03); AIRCr (4.72e-03, 3.37e-03)
adp	ADP	ATP/ADP	Purine Metabolism	Nitrogen disposal	0.004223	ATPM (1.85e+01, 1.85e+01); ADK1 (2.63e-01, 2.20e-01); GK1 (1.86e-02, 1.33e-02); PRFGS (4.72e-03, 3.37e-03); PRAGSr (4.72e-03, 3.37e-03); PRASCS (4.72e-03, 3.37e-03); NDPK1 (4.11e-03, 2.93e-03); NDPK8 (1.68e-03, 1.20e-03); NDPK8m (8.41e-04, 6.00e-04); NDPK10n (8.41e-04, 6.00e-04); NDPK10 (8.41e-04, 6.00e-04); NDPK5 (6.06e-04, 4.33e-04)
13dpg	3-Phospho-D-glyceroyl phosphate	3-Phospho-D-glyceroyl phosphate	Biosynthesis Of Amino Acids	Biosynthesis Of Amino Acids	-0.00164391	PGK (9.96e+00, 9.97e+00)
3mob	3-methyl-2-oxobutanoate	Î±-Ketoisovalerate	Valine, Leucine And Isoleucine Biosynthesis	BCAA metabolism (Val/Leu/Iso)	-0.347877	VALTA (2.56e-02, 3.26e-02); r0385 (2.56e-02, 3.26e-02)
dad_2	Deoxyadenosine	dA	Nucleotide Interconversion	Nucleotide metabolism	0.486035	DADNK (8.41e-04, 6.00e-04)
gthrd	Reduced glutathione	Reduced glutathione	Transport, Endoplasmic Reticulum	Transport, Endoplasmic Reticulum	0.486035	HUMANGEM_MAR06107 (2.33e-02, 1.66e-02)
alpam	S-aminomethyldihydrolipoamide	S-aminomethyldihydrolipoamide	Alanine, Aspartate And Glutamate Metabolism	AA central (A/D/E,G/S/T)	-9.79716	GCC2am (4.20e-04, 3.74e-01); GCC2bim (4.20e-04, 3.74e-01)
dad_2	Deoxyadenosine	dA	Purine Metabolism	Nitrogen disposal	0.486035	PUNP2 (8.41e-04, 6.00e-04)
3pg	3-Phospho-D-glycerate	3-PG	Methane Metabolism	Methane Metabolism	-0.00164391	PGM (9.96e+00, 9.60e+00); PGCD (4.20e-04, 3.74e-01)
cbp	Carbamoyl phosphate	Carbamoyl phosphate	Pyrimidine Metabolism	Nucleotide metabolism	0.486035	ASPCTr (3.67e-03, 2.62e-03)
mlthf	5,10-Methylenetetrahydrofolate	CH2-THF	Alanine, Aspartate And Glutamate Metabolism	AA central (A/D/E,G/S/T)	-9.79716	GHMT2rm (4.20e-04, 3.74e-01); GCC2bim (4.20e-04, 3.74e-01)
nad	Nicotinamide adenine dinucleotide	NAD(+)	Glycolysis/Gluconeogenesis	Central Energy Metabolism	0.00617874	GAPD (9.96e+00, 9.97e+00); PDHm (6.11e-01, 1.70e-01); GCC2cm (6.34e-02, 4.48e-01)
dctp	dCTP	dCTP	Nucleotide Interconversion	Nucleotide metabolism	0.486035	CYTK12 (6.06e-04, 4.33e-04)
dttp	dTTP	dTTP	Pyrimidine Metabolism	Nucleotide metabolism	0.486035	NDPK4n (8.41e-04, 6.00e-04)
h2o	Water	H2O	Glycine, Serine And Threonine Metabolism	AA central (A/D/E,G/S/T)	-0.172532	r0552m (2.21e+00, 2.22e+00); r0553m (2.21e+00, 2.22e+00); r0553 (1.27e+00, 1.32e+00); r0552 (1.27e+00, 1.32e+00); GHMT2rm (4.20e-04, 3.74e-01); PSP__Lm (4.20e-04, 3.74e-01)
pi	hydrogenphosphate	HPO4	Pyrimidine Synthesis	Nucleotide metabolism	0.486035	CTPS2 (1.29e-02, 9.24e-03); ASPCTr (3.67e-03, 2.62e-03)
glu__L	L-glutamate(1-)	L-Glu	Purine Metabolism	Nitrogen disposal	0.486035	PRFGS (4.72e-03, 3.37e-03); GLUPRT (4.72e-03, 3.37e-03)
gly	Glycine	Glycine	Extracellular Transport	Extracellular Transport	0.486035	r1402 (6.17e-04, 4.41e-04)
nadph	Nicotinamide adenine dinucleotide phosphate - reduced	NADP(+)	Glutathione Metabolism	Redox & Pentose Metabolism	0.486035	GND (8.38e-03, 5.99e-03)
h2o2	Hydrogen peroxide	Hydrogen peroxide	Extracellular Transport	Extracellular Transport	0.0723853	H2O2t (6.54e-02, 6.22e-02)
ditp	dITP(4-)	DITP	Transport, Nuclear	Transport, Nuclear	0.486035	DITPtn (8.41e-04, 6.00e-04)
10fthf	10-Formyltetrahydrofolate	10-Formyltetrahydrofolate	Folate Metabolism	Folate Metabolism	-6.32096	FTHFDHm (0.00e+00, 7.47e-01); MTHFCm (0.00e+00, 7.47e-01); FTHFL (9.43e-03, 6.74e-03); GARFT (4.72e-03, 3.37e-03); AICART (4.72e-03, 3.37e-03)
cit	Citrate	Citrate	Glyoxylate And Dicarboxylate Metabolism	Glyoxylate And Dicarboxylate Metabolism	1.40307	CSm (5.58e-01, 2.11e-01)
cit	Citrate	Citrate	2-oxocarboxylic Acid Metabolism	2-oxocarboxylic Acid Metabolism	1.40307	ACONTm (5.58e-01, 2.11e-01); CSm (5.58e-01, 2.11e-01)
tyr__L	L-tyrosine	L-tyrosine	Extracellular Transport	Extracellular Transport	0.486035	TYRPHELAT2tc (1.12e-02, 7.97e-03); r1402 (6.17e-04, 4.41e-04)
r1p	alpha-D-Ribose 1-phosphate	Alpha-D-Ribose 1-phosphate	Pyrimidine Catabolism	Nucleotide metabolism	0.486035	PYNP2r (1.63e-02, 1.16e-02)
chol	Choline	Choline	Extracellular Transport	Extracellular Transport	0.486035	CHOLtu (3.64e-03, 2.60e-03)
orot5p	Orotidine 5-phosphate	Orotidine 5-phosphate	Pyrimidine Synthesis	Nucleotide metabolism	0.486035	ORPT (3.67e-03, 2.62e-03); OMPDC (3.67e-03, 2.62e-03)
gtp	GTP	GTP	Alanine, Aspartate And Glutamate Metabolism	AA central (A/D/E,G/S/T)	0.486035	ADSS (3.24e-03, 2.32e-03)
his__L	L-histidine	L-histidine	Pseudoreactions	Pseudoreactions	0.486035	EX_his__L_e (8.57e-03, 6.12e-03)
hco3	Bicarbonate	HCO3	Nitrogen Metabolism	Nitrogen disposal	0.634859	r1418c (2.45e+00, 1.77e+00); r1418m (7.11e-01, 2.84e-01); r1418 (4.38e-02, 1.22e-02)
pi	hydrogenphosphate	HPO4	Glycerophospholipid Metabolism	Lipid metabolism	0.486035	PGPP_hs (1.95e-04, 1.39e-04)
gln__L	L-glutamine	L-Gln	Purine Metabolism	Nitrogen disposal	0.486035	PRFGS (4.72e-03, 3.37e-03); GLUPRT (4.72e-03, 3.37e-03)
ctp	CTP	CTP	Biomass And Maintenance Functions	Biomass And Maintenance Functions	0.486035	BIOMASS_maintenance (2.40e-02, 1.72e-02)
glygn2	glycogen, structure 2 (glycogenin-1,6-{7[1,4-Glc], 4[1,4-Glc]})	Glycogen, structure 2 (glycogenin-1,6-{7[1,4-Glc], 4[1,4-Glc]})	Biomass And Maintenance Functions	Biomass And Maintenance Functions	0.486035	BIOMASS_maintenance (2.40e-02, 1.72e-02)
asp__L	L-aspartate(1-)	L-aspartate(1-)	Nucleotide Metabolism	Nucleotide metabolism	0.486035	ADSS (3.24e-03, 2.32e-03)
gly	Glycine	Glycine	Alanine, Aspartate And Glutamate Metabolism	AA central (A/D/E,G/S/T)	-9.79716	GHMT2rm (4.20e-04, 3.74e-01); GCC2am (4.20e-04, 3.74e-01)
nadh	Nicotinamide adenine dinucleotide - reduced	NAD(+)	Nitrogen Metabolism	Nitrogen disposal	0.889128	GLUDxm (5.97e-01, 3.22e-01)
mal__L	(S)-malate(2-)	(S)-malate(2-)	Citric Acid Cycle	Central Energy Metabolism	0.0775256	FUMm (1.38e+01, 1.27e+01); FUM (1.26e+01, 1.18e+01); MDH (3.39e-02, 5.28e-01)
dgtp	dGTP	dGTP	Nucleotide Metabolism	Nucleotide metabolism	0.486035	NDPK5 (6.06e-04, 4.33e-04)
uri	Uridine	Uridine	Extracellular Transport	Extracellular Transport	0.486035	URIt (1.08e-02, 7.71e-03)
2dr1p	2-Deoxy-D-ribose 1-phosphate	2-Deoxy-D-ribose 1-phosphate	Purine Catabolism	Purine Catabolism	0.486035	PUNP4 (1.72e-02, 1.22e-02); PUNP2 (8.41e-04, 6.00e-04)
ppi	Diphosphate	PPi	Nucleotide Metabolism	Nucleotide metabolism	0.486035	GUAPRT (1.75e-02, 1.25e-02); R_group_phosphotase_1 (1.27e-02, 9.04e-03)
nad	Nicotinamide adenine dinucleotide	NAD(+)	Glycerophospholipid Metabolism	Lipid metabolism	0.486035	r0202c (6.01e-03, 4.29e-03)
glu__L	L-glutamate(1-)	L-Glu	Pantothenate And Coa Biosynthesis	Pantothenate And Coa Biosynthesis	-0.347877	VALTA (2.56e-02, 3.26e-02)
dttp	dTTP	dTTP	Transport, Nuclear	Transport, Nuclear	0.486035	DTTPtn (8.41e-04, 6.00e-04)
pi	hydrogenphosphate	HPO4	Glyoxylate And Dicarboxylate Metabolism	Glyoxylate And Dicarboxylate Metabolism	-0.224537	PPCOACm (6.29e-02, 7.35e-02)
2pg	D-Glycerate 2-phosphate	D-Glycerate 2-phosphate	Glycolysis/Gluconeogenesis	Central Energy Metabolism	0.0534468	ENO (9.96e+00, 9.60e+00); PGM (9.96e+00, 9.60e+00)
ile__L	L-isoleucine	L-isoleucine	Pseudoreactions	Pseudoreactions	0	EX_ile__L_e (5.00e-02, 5.00e-02)
adp	ADP	ATP/ADP	Nucleotide Metabolism	Nucleotide metabolism	0.00478311	ATPM (1.85e+01, 1.85e+01); ADK1 (2.63e-01, 2.20e-01); GK1 (1.86e-02, 1.33e-02); URIDK2 (1.69e-02, 1.21e-02); CTPS2 (1.29e-02, 9.24e-03); CYTDK1 (5.28e-03, 3.77e-03); NDPK1 (4.11e-03, 2.93e-03); NDPK8 (1.68e-03, 1.20e-03); NDPK3m (1.50e-03, 1.07e-03); CYTK1 (1.21e-03, 8.65e-04); NDPK6m (8.41e-04, 6.00e-04); NDPK8m (8.41e-04, 6.00e-04); NDPK4n (8.41e-04, 6.00e-04); NDPK10n (8.41e-04, 6.00e-04); NDP…
icit	Isocitrate	Isocitrate	Citric Acid Cycle	Central Energy Metabolism	1.40307	ACONTm (5.58e-01, 2.11e-01); ICDHxm (5.58e-01, 2.11e-01)
q10	ubiquinone-10	Ubiquinone-10	Tryptophan Metabolism	AAA metabolism (Trp/Phe/Tyr)	-2.51396	r0541 (6.46e-03, 3.69e-02)
glygn1	glycogen, structure 1 (glycogenin-11[1,4-Glc])	Glycogen, structure 1 (glycogenin-11[1,4-Glc])	Starch And Sucrose Metabolism	Starch And Sucrose Metabolism	0.486035	GLBRAN (6.17e-04, 4.41e-04); GLGNS1 (6.17e-04, 4.41e-04)
g6p	D-Glucose 6-phosphate	D-Glucose 6-phosphate	Pentose Phosphate Pathway	Redox & Pentose Metabolism	0.486035	G6PDH2r (8.38e-03, 5.99e-03)
oaa	Oxaloacetate	Oxaloacetate	Pyruvate Metabolism	Central Energy Metabolism	-0.320331	PCm (5.58e-01, 2.11e-01); MDH (3.39e-02, 5.28e-01)
gly	Glycine	Glycine	Purine Synthesis	Nucleotide metabolism	0.486035	PRAGSr (4.72e-03, 3.37e-03)
asp__L	L-aspartate(1-)	L-aspartate(1-)	Pyrimidine Synthesis	Nucleotide metabolism	0.486035	ASPCTr (3.67e-03, 2.62e-03)
nadph	Nicotinamide adenine dinucleotide phosphate - reduced	NADP(+)	Nucleotide Interconversion	Nucleotide metabolism	-0.142845	GMPR (1.06e+00, 1.17e+00); TRDR (2.89e-03, 2.07e-03)
h2o	Water	H2O	Fatty Acid Degradation	Lipid metabolism	-2.51396	ECOAH1m (6.46e-03, 3.69e-02)
mlthf	5,10-Methylenetetrahydrofolate	CH2-THF	Biosynthesis Of Amino Acids	Biosynthesis Of Amino Acids	-9.79716	GHMT2rm (4.20e-04, 3.74e-01)
ppi	Diphosphate	PPi	Pyrimidine Synthesis	Nucleotide metabolism	0.486035	ORPT (3.67e-03, 2.62e-03)
dad_2	Deoxyadenosine	dA	Nucleotide Metabolism	Nucleotide metabolism	0.486035	PUNP2 (8.41e-04, 6.00e-04)
ser__L	L-serine	L-ser	Glycerophospholipid Metabolism	Lipid metabolism	0.486035	PSSA1_hs (1.60e-03, 1.14e-03)
42A3HP24DB	4-(2-Amino-3-hydroxyphenyl)-2,4-dioxobutanoate	4-(2-Amino-3-hydroxyphenyl)-2,4-dioxobutanoate	Tryptophan Metabolism	AAA metabolism (Trp/Phe/Tyr)	0.486035	r0647 (9.43e-03, 6.74e-03); 3HKYNAKGAT (9.43e-03, 6.74e-03)
nadph	Nicotinamide adenine dinucleotide phosphate - reduced	NADP(+)	Purine Metabolism	Nitrogen disposal	-0.143886	r0276 (1.06e+00, 1.17e+00); GMPR (1.06e+00, 1.17e+00)
nh4	Ammonium	NH4	Arginine Biosynthesis	AA other (Cys/Met/Lys/Arg/Pro)	0.413557	GLUDxm (5.97e-01, 3.22e-01); GLUNm (4.63e-01, 4.74e-01); r0034 (3.67e-03, 2.62e-03)
dudp	dUDP	dUDP	Pyrimidine Metabolism	Nucleotide metabolism	0.486035	URIDK2 (1.69e-02, 1.21e-02); NDPK6m (8.41e-04, 6.00e-04)
fum	Fumarate	Fumarate	Alanine, Aspartate And Glutamate Metabolism	AA central (A/D/E,G/S/T)	0.486035	ADSL1 (3.24e-03, 2.32e-03)
cdp	CDP	CDP	Nucleotide Metabolism	Nucleotide metabolism	0.486035	NDPK3m (1.50e-03, 1.07e-03); CYTK1 (1.21e-03, 8.65e-04); CYTK1m (3.53e-04, 2.52e-04)
h	proton	H	Nitrogen Metabolism	Nitrogen disposal	0.671742	r1418c (2.45e+00, 1.77e+00); r1418m (7.11e-01, 2.84e-01); GLUDxm (5.97e-01, 3.22e-01); r1418 (4.38e-02, 1.22e-02); r0034 (3.67e-03, 2.62e-03)
succ	Succinate	Succinate	Citric Acid Cycle	Central Energy Metabolism	0.455985	r0509 (1.19e+00, 8.66e-01); SUCOASm (1.19e+00, 8.66e-01)
nadph	Nicotinamide adenine dinucleotide phosphate - reduced	NADP(+)	Ascorbate And Aldarate Metabolism	Ascorbate And Aldarate Metabolism	0.0723853	DASCBR (3.27e-02, 3.11e-02)
co2	carbon dioxide	CO2	Pyrimidine Synthesis	Nucleotide metabolism	0.486035	OMPDC (3.67e-03, 2.62e-03)
betald	betaine aldehyde	Betaine aldehyde	Glycine, Serine And Threonine Metabolism	AA central (A/D/E,G/S/T)	-0.0280119	r0553m (2.21e+00, 2.22e+00); r0552m (2.21e+00, 2.22e+00); r0552 (1.27e+00, 1.32e+00); r0553 (1.27e+00, 1.32e+00)
glu__L	L-glutamate(1-)	L-Glu	Nucleotide Metabolism	Nucleotide metabolism	0.486035	CTPS2 (1.29e-02, 9.24e-03)
gsn	Guanosine	Guanosine	Purine Catabolism	Purine Catabolism	0.486035	PUNP3 (3.53e-04, 2.52e-04)
atp	ATP	ATP/ADP	Nitrogen Metabolism	Nitrogen disposal	0.486035	r0034 (3.67e-03, 2.62e-03)
ctp	CTP	CTP	Transport, Mitochondrial	Mitochondrial transport	-0.142723	HUMANGEM_MAR20145 (1.06e+00, 1.17e+00); HUMANGEM_MAR20139 (1.06e+00, 1.17e+00); HUMANGEM_MAR20148 (1.85e-03, 1.32e-03); HUMANGEM_MAR20147 (1.85e-03, 1.32e-03)
adp	ADP	ATP/ADP	Pyrimidine Synthesis	Nucleotide metabolism	0.486035	CTPS2 (1.29e-02, 9.24e-03)
o2	O2	O2	Extracellular Transport	Extracellular Transport	0.074505	O2t (3.29e+00, 3.12e+00)
ura	uracil	Uracil	Pyrimidine Metabolism	Nucleotide metabolism	0.486035	PYNP2r (1.63e-02, 1.16e-02)
asn__L	L-asparagine	L-asparagine	Pseudoreactions	Pseudoreactions	0.486035	EX_asn__L_e (1.20e-02, 8.55e-03)
dag_hs	diglyceride	Diglyceride	Sphingolipid Metabolism	Lipid metabolism	0.486035	SMS (5.14e-04, 3.67e-04)
dcamp	N6-(1,2-Dicarboxyethyl)-AMP	N6-(1,2-Dicarboxyethyl)-AMP	Alanine, Aspartate And Glutamate Metabolism	AA central (A/D/E,G/S/T)	0.486035	ADSL1 (3.24e-03, 2.32e-03); ADSS (3.24e-03, 2.32e-03)
phe__L	L-phenylalanine	L-Phe	Phenylalanine Metabolism	AAA metabolism (Trp/Phe/Tyr)	0.0761316	PHETA1m (9.96e+00, 9.45e+00); PHETA1 (9.96e+00, 9.45e+00)
so4	sulfate	Sulfate	Transport, Mitochondrial	Mitochondrial transport	0.0919785	MALSO4tm (1.26e+01, 1.18e+01); FUMSO4tm (1.26e+01, 1.18e+01)
gtp	GTP	GTP	Biomass And Maintenance Functions	Biomass And Maintenance Functions	0.486035	BIOMASS_maintenance (2.40e-02, 1.72e-02)
g1p	D-Glucose 1-phosphate	D-Glucose 1-phosphate	Pentose And Glucuronate Interconversions	Redox & Pentose Metabolism	0.486035	GALU (1.85e-03, 1.32e-03)
fpram	2-(Formamido)-N1-(5-phospho-D-ribosyl)acetamidine	2-(Formamido)-N1-(5-phospho-D-ribosyl)acetamidine	Purine Metabolism	Nitrogen disposal	0.486035	PRFGS (4.72e-03, 3.37e-03)
h	proton	H	Vitamin C Metabolism	Vitamin C Metabolism	0.0723853	ASCBOX (3.27e-02, 3.11e-02)
ppi	Diphosphate	PPi	Glycerophospholipid Metabolism	Lipid metabolism	0.486035	CHLPCTD (1.16e-02, 8.26e-03); CDS (7.90e-04, 5.64e-04)
glc__D	D-glucose	Glc	Glycolysis/Gluconeogenesis	Central Energy Metabolism	4.92367e-13	HEX1 (5.00e+00, 5.00e+00)
akg	2-Oxoglutarate	Î±-KG	Cysteine And Methionine Metabolism	AA other (Cys/Met/Lys/Arg/Pro)	-9.79716	PSERT (4.20e-04, 3.74e-01)
icit	Isocitrate	Isocitrate	2-oxocarboxylic Acid Metabolism	2-oxocarboxylic Acid Metabolism	1.40307	ACONTm (5.58e-01, 2.11e-01); ICDHxm (5.58e-01, 2.11e-01)
h	proton	H	Pentose Phosphate Pathway	Redox & Pentose Metabolism	0.486035	PRPPS (2.59e-02, 1.85e-02); G6PDH2r (8.38e-03, 5.99e-03); PGL (8.38e-03, 5.99e-03)
glu__L	L-glutamate(1-)	L-Glu	Pyrimidine Synthesis	Nucleotide metabolism	0.486035	CTPS2 (1.29e-02, 9.24e-03)
h	proton	H	Folate Metabolism	Folate Metabolism	-0.709485	r0553 (1.27e+00, 1.32e+00); r0552 (1.27e+00, 1.32e+00); FTHFDHm (0.00e+00, 7.47e-01); MTHFCm (0.00e+00, 7.47e-01); GARFT (4.72e-03, 3.37e-03); r0226 (8.41e-04, 6.00e-04)
atp	ATP	ATP/ADP	Pentose Phosphate Pathway	Redox & Pentose Metabolism	0.486035	PRPPS (2.59e-02, 1.85e-02)
gln__L	L-glutamine	L-Gln	Nucleotide Metabolism	Nucleotide metabolism	0.486035	CTPS2 (1.29e-02, 9.24e-03)
gly	Glycine	Glycine	Biosynthesis Of Amino Acids	Biosynthesis Of Amino Acids	-9.79716	GHMT2rm (4.20e-04, 3.74e-01)
dhf	7,8-Dihydrofolate	7,8-Dihydrofolate	Folate Metabolism	Folate Metabolism	0.486035	r0226 (8.41e-04, 6.00e-04)
adp	ADP	ATP/ADP	Glycerophospholipid Metabolism	Lipid metabolism	0.486035	CHOLK (1.16e-02, 8.26e-03); DAGK_hs (1.13e-02, 8.08e-03)
coa	Coenzyme A	CoA	Nucleotide Metabolism	Nucleotide metabolism	0.486035	R_group_phosphotase_1 (1.27e-02, 9.04e-03)
atp	ATP	ATP/ADP	Folate Metabolism	Folate Metabolism	0.486035	FTHFL (9.43e-03, 6.74e-03)
h2o	Water	H2O	Pyruvate Metabolism	Central Energy Metabolism	0.106452	FUMm (1.38e+01, 1.27e+01); FUM (1.26e+01, 1.18e+01)
nh4	Ammonium	NH4	Urea Cycle	Nitrogen disposal	0.486035	r0034 (3.67e-03, 2.62e-03)
dtdp	dTDP	dTDP	Transport, Mitochondrial	Mitochondrial transport	0.486035	DNDPt14m (8.41e-04, 6.00e-04)
3dsphgn	(2S)-1-hydroxy-3-oxooctadecan-2-aminium	(2S)-1-hydroxy-3-oxooctadecan-2-aminium	Sphingolipid Metabolism	Lipid metabolism	0.486035	3DSPHR (5.14e-04, 3.67e-04); SERPT (5.14e-04, 3.67e-04)
gly	Glycine	Glycine	Methane Metabolism	Methane Metabolism	-9.79716	GHMT2rm (4.20e-04, 3.74e-01)
pyr	pyruvate	Pyr	Citric Acid Cycle	Central Energy Metabolism	1.40307	PCm (5.58e-01, 2.11e-01)
pi	hydrogenphosphate	HPO4	Glycine, Serine And Threonine Metabolism	AA central (A/D/E,G/S/T)	-9.79716	PSP__Lm (4.20e-04, 3.74e-01)
gar	N1-(5-Phospho-D-ribosyl)glycinamide	N1-(5-Phospho-D-ribosyl)glycinamide	Folate Metabolism	Folate Metabolism	0.486035	GARFT (4.72e-03, 3.37e-03)
tyr__L	L-tyrosine	L-tyrosine	Biomass And Maintenance Functions	Biomass And Maintenance Functions	0.486035	BIOMASS_maintenance (2.40e-02, 1.72e-02)
pep	Phosphoenolpyruvate	Phosphoenolpyruvate	Pyruvate Metabolism	Central Energy Metabolism	0.0534468	PYK (9.96e+00, 9.60e+00)
ser__L	L-serine	L-ser	Pseudoreactions	Pseudoreactions	0.486035	EX_ser__L_e (3.16e-02, 2.26e-02)
q10	ubiquinone-10	Ubiquinone-10	Valine, Leucine And Isoleucine Biosynthesis	BCAA metabolism (Val/Leu/Iso)	-0.224537	r0603 (3.73e-02, 4.10e-02); r0560 (2.56e-02, 3.26e-02)
prpp	5-Phospho-alpha-D-ribose 1-diphosphate	5-Phospho-alpha-D-ribose 1-diphosphate	Pyrimidine Metabolism	Nucleotide metabolism	0.486035	ORPT (3.67e-03, 2.62e-03)
mlthf	5,10-Methylenetetrahydrofolate	CH2-THF	Cyanoamino Acid Metabolism	Cyanoamino Acid Metabolism	-9.79716	GHMT2rm (4.20e-04, 3.74e-01)
utp	UTP	UTP	Biomass And Maintenance Functions	Biomass And Maintenance Functions	0.486035	BIOMASS_maintenance (2.40e-02, 1.72e-02)
dhcrm_hs	dihydroceramide	Dihydroceramide	Sphingolipid Metabolism	Lipid metabolism	0.486035	RE2675C (5.14e-04, 3.67e-04); DSAT (5.14e-04, 3.67e-04)
mmcoa_S	(S)-methylmalonyl-CoA(5-)	(S)-methylmalonyl-CoA(5-)	Propanoate Metabolism	Propanoate Metabolism	-0.224537	PPCOACm (6.29e-02, 7.35e-02); MMEm (6.29e-02, 7.35e-02)
nadh	Nicotinamide adenine dinucleotide - reduced	NAD(+)	Oxidative Phosphorylation	Oxidative Phosphorylation	0.0104519	NADH2_u10m (5.28e+00, 5.24e+00)
nadh	Nicotinamide adenine dinucleotide - reduced	NAD(+)	Lysine Metabolism	AA other (Cys/Met/Lys/Arg/Pro)	-2.51396	2OXOADOXm (6.46e-03, 3.69e-02); r0594m (6.46e-03, 3.69e-02); r0525 (6.46e-03, 3.69e-02)
gmp	GMP	GMP	Purine Catabolism	Purine Catabolism	-0.14353	r0276 (1.06e+00, 1.17e+00)
h2o	Water	H2O	Fatty Acid Biosynthesis	Lipid metabolism	0.486035	FAS160COA (1.29e-02, 9.23e-03); FAS120COA (1.29e-02, 9.23e-03); FAS140COA (1.29e-02, 9.23e-03); FAS100COA (1.29e-02, 9.23e-03); FAS80COA__L (1.29e-02, 9.23e-03)
nad	Nicotinamide adenine dinucleotide	NAD(+)	Glycine, Serine And Threonine Metabolism	AA central (A/D/E,G/S/T)	-0.172532	r0552m (2.21e+00, 2.22e+00); r0552 (1.27e+00, 1.32e+00); PGCD (4.20e-04, 3.74e-01)
L2aadp6sa	L-allysine	L-allysine	Lysine Metabolism	AA other (Cys/Met/Lys/Arg/Pro)	-2.51396	r0594m (6.46e-03, 3.69e-02); r0525 (6.46e-03, 3.69e-02)
nadh	Nicotinamide adenine dinucleotide - reduced	NAD(+)	Valine, Leucine And Isoleucine Degradation	BCAA metabolism (Val/Leu/Iso)	-0.224537	HACD9m (3.73e-02, 4.10e-02); MMSAD1m (2.56e-02, 3.26e-02)
gln__L	L-glutamine	L-Gln	Pyrimidine Synthesis	Nucleotide metabolism	0.486035	CTPS2 (1.29e-02, 9.24e-03)
gua	Guanine	Guanine	Nucleotide Metabolism	Nucleotide metabolism	0.486035	GUAPRT (1.75e-02, 1.25e-02); PUNP4 (1.72e-02, 1.22e-02); PUNP3 (3.53e-04, 2.52e-04)
pe_hs	Phosphatidylethanolamine (gallus gallus)	Phosphatidylethanolamine (gallus gallus)	Biomass And Maintenance Functions	Biomass And Maintenance Functions	0.486035	BIOMASS_maintenance (2.40e-02, 1.72e-02)
nadph	Nicotinamide adenine dinucleotide phosphate - reduced	NADP(+)	Nucleotide Metabolism	Nucleotide metabolism	-0.143886	r0276 (1.06e+00, 1.17e+00); GMPR (1.06e+00, 1.17e+00)
aacoa	Acetoacetyl-CoA	Acetoacetyl-CoA	Valine, Leucine And Isoleucine Degradation	BCAA metabolism (Val/Leu/Iso)	-2.51396	AACOAT (6.46e-03, 3.69e-02); ACACT1r (6.46e-03, 3.69e-02); HMGCOASim (6.46e-03, 3.69e-02)
cys__L	L-cysteine	L-Cys	Pseudoreactions	Pseudoreactions	0.486035	EX_cys__L_e (1.70e-02, 1.22e-02)
r1p	alpha-D-Ribose 1-phosphate	Alpha-D-Ribose 1-phosphate	Purine Metabolism	Nitrogen disposal	0.486035	PPM (1.75e-02, 1.25e-02); PUNP1 (8.41e-04, 6.00e-04); PUNP3 (3.53e-04, 2.52e-04)
pglyc_hs	phosphatidylglycerol(1-)	Phosphatidylglycerol(1-)	Glycerophospholipid Metabolism	Lipid metabolism	0.486035	PGPP_hs (1.95e-04, 1.39e-04); CLSm_hs (1.59e-04, 1.13e-04)
dgdp	dGDP	dGDP	Purine Metabolism	Nitrogen disposal	0.486035	NDPK5 (6.06e-04, 4.33e-04)
nadh	Nicotinamide adenine dinucleotide - reduced	NAD(+)	2-oxocarboxylic Acid Metabolism	2-oxocarboxylic Acid Metabolism	0.926351	AKGDm (1.13e+00, 7.93e-01); PDHm (6.11e-01, 1.70e-01); ICDHxm (5.58e-01, 2.11e-01); 2OXOADOXm (6.46e-03, 3.69e-02)
pyr	pyruvate	Pyr	2-oxocarboxylic Acid Metabolism	2-oxocarboxylic Acid Metabolism	1.76974	PDHm (6.11e-01, 1.70e-01); ALATA__L (2.19e-02, 1.56e-02)
ade	Adenine	Adenine	Purine Metabolism	Nitrogen disposal	0.486035	PUNP2 (8.41e-04, 6.00e-04); PUNP1 (8.41e-04, 6.00e-04)
h	proton	H	Oxidative Phosphorylation	Oxidative Phosphorylation	0.0423802	ATPS4m (1.01e+01, 9.89e+00); CYOR_u10m (6.54e+00, 6.22e+00); NADH2_u10m (5.28e+00, 5.24e+00); CYOOm3 (3.27e+00, 3.11e+00); PPAm (2.76e-01, 2.29e-01)
L2aadp	L-2-aminoadipate(1-)	Adipates	Lysine Biosynthesis	Lysine Biosynthesis	-2.51396	r0450 (6.46e-03, 3.69e-02)
akg	2-Oxoglutarate	Î±-KG	Methane Metabolism	Methane Metabolism	-9.79716	PSERT (4.20e-04, 3.74e-01)
h	proton	H	Valine, Leucine And Isoleucine Degradation	BCAA metabolism (Val/Leu/Iso)	-0.475297	PPCOACm (6.29e-02, 7.35e-02); HACD9m (3.73e-02, 4.10e-02); HMGCOASim (6.46e-03, 3.69e-02); 3HBCOAHLm (2.56e-02, 3.26e-02)
atp	ATP	ATP/ADP	Oxidative Phosphorylation	Oxidative Phosphorylation	0.0276149	ATPS4m (1.01e+01, 9.89e+00)
pi	hydrogenphosphate	HPO4	Purine Catabolism	Purine Catabolism	0.486035	PUNP4 (1.72e-02, 1.22e-02); PUNP2 (8.41e-04, 6.00e-04); PUNP3 (3.53e-04, 2.52e-04)
6pgc	6-Phospho-D-gluconate	6-Phospho-D-gluconate	Glutathione Metabolism	Redox & Pentose Metabolism	0.486035	GND (8.38e-03, 5.99e-03)
Rtotalcoa	R total Coenzyme A	R total Coenzyme A	Sphingolipid Metabolism	Lipid metabolism	0.486035	DSAT (5.14e-04, 3.67e-04)
accoa	Acetyl-CoA	Acetyl-CoA	Valine, Leucine And Isoleucine Biosynthesis	BCAA metabolism (Val/Leu/Iso)	-0.133464	ACACT10m (3.73e-02, 4.10e-02)
trp__L	L-tryptophan	L-tryptophan	Pseudoreactions	Pseudoreactions	0.486035	EX_trp__L_e (1.51e-02, 1.08e-02)
atp	ATP	ATP/ADP	Valine, Leucine And Isoleucine Degradation	BCAA metabolism (Val/Leu/Iso)	-0.67026	PPCOACm (6.29e-02, 7.35e-02); AACOAT (6.46e-03, 3.69e-02)
accoa	Acetyl-CoA	Acetyl-CoA	Terpenoid Backbone Biosynthesis	Terpenoid Backbone Biosynthesis	-2.51396	HMGCOASim (6.46e-03, 3.69e-02); ACACT1r (6.46e-03, 3.69e-02)
gly	Glycine	Glycine	Glutathione Metabolism	Redox & Pentose Metabolism	0.486035	AMPTASECG (2.33e-02, 1.66e-02)
glu__L	L-glutamate(1-)	L-Glu	Pseudoreactions	Pseudoreactions	0	EX_glu__L_e (5.00e-02, 5.00e-02)
pi	hydrogenphosphate	HPO4	Fatty Acid Degradation	Lipid metabolism	0.486035	ACCOACm (9.04e-02, 0.00e+00); ACCOAC (0.00e+00, 6.46e-02)
nadh	Nicotinamide adenine dinucleotide - reduced	NAD(+)	Fatty Acid Metabolism	Lipid metabolism	-2.51396	HACD1m (6.46e-03, 3.69e-02)
h2o	Water	H2O	Sphingolipid Metabolism	Lipid metabolism	0.486035	RE2675C (5.14e-04, 3.67e-04)
ascb__L	L-ascorbate	L-ascorbate	Vitamin C Metabolism	Vitamin C Metabolism	0.0723853	ASCBOX (3.27e-02, 3.11e-02)
thr__L	L-Threonine	L-Thr	Extracellular Transport	Extracellular Transport	0.486035	THRt4 (2.18e-02, 1.56e-02); r1402 (6.17e-04, 4.41e-04)
co2	carbon dioxide	CO2	Glycine, Serine And Threonine Metabolism	AA central (A/D/E,G/S/T)	-9.79716	GCC2am (4.20e-04, 3.74e-01)
fum	Fumarate	Fumarate	Transport, Mitochondrial	Mitochondrial transport	0.0919785	FUMSO4tm (1.26e+01, 1.18e+01)
lac__L	(S)-lactate	(S)-lactate	Pseudoreactions	Pseudoreactions	-0.129935	EX_lac__L_e (8.72e+00, 9.55e+00)
cytd	Cytidine	Cytidine	Extracellular Transport	Extracellular Transport	0.486035	CYTDt (1.08e-02, 7.71e-03)
leu__L	L-leucine	L-leucine	Extracellular Transport	Extracellular Transport	0.486035	r1402 (6.17e-04, 4.41e-04)
dtmp	dTMP	dTMP	Pyrimidine Synthesis	Nucleotide metabolism	0.486035	RE0452M (8.41e-04, 6.00e-04)
glc__D	D-glucose	Glc	Pseudoreactions	Pseudoreactions	4.92046e-13	EX_glc__D_e (5.00e+00, 5.00e+00)
nad	Nicotinamide adenine dinucleotide	NAD(+)	Fatty Acid Degradation	Lipid metabolism	-2.51396	HACD1m (6.46e-03, 3.69e-02)
pail_hs	1-phosphatidyl-1D-myo-inositol(1-)	1-Phosphatidyl-1D-myo-inositol(1-)	Glycerophospholipid Metabolism	Lipid metabolism	0.486035	CDIPTr (4.37e-04, 3.12e-04)
aacoa	Acetoacetyl-CoA	Acetoacetyl-CoA	Fatty Acid Metabolism	Lipid metabolism	-2.51396	ACACT1r (6.46e-03, 3.69e-02); HACD1m (6.46e-03, 3.69e-02)
malcoa	Malonyl-CoA	Malonyl-CoA	Fatty Acid Metabolism	Lipid metabolism	0.486035	ACCOACm (9.04e-02, 0.00e+00); ACCOAC (0.00e+00, 6.46e-02)
3mob	3-methyl-2-oxobutanoate	Î±-Ketoisovalerate	2-oxocarboxylic Acid Metabolism	2-oxocarboxylic Acid Metabolism	-0.347877	VALTA (2.56e-02, 3.26e-02)
dadp	dADP	dADP	Nucleotide Interconversion	Nucleotide metabolism	0.486035	NDPK8 (1.68e-03, 1.20e-03); NDPK8m (8.41e-04, 6.00e-04); ADKd (8.41e-04, 6.00e-04)
hco3	Bicarbonate	HCO3	Pseudoreactions	Pseudoreactions	0.509227	EX_hco3_e (2.41e+00, 1.69e+00)
prpp	5-Phospho-alpha-D-ribose 1-diphosphate	5-Phospho-alpha-D-ribose 1-diphosphate	Pentose Phosphate Pathway	Redox & Pentose Metabolism	0.486035	PRPPS (2.59e-02, 1.85e-02)
nadh	Nicotinamide adenine dinucleotide - reduced	NAD(+)	Arginine Biosynthesis	AA other (Cys/Met/Lys/Arg/Pro)	0.889128	GLUDxm (5.97e-01, 3.22e-01)
ump	UMP	UMP	Pyrimidine Metabolism	Nucleotide metabolism	0.486035	NTD2 (5.52e-03, 3.94e-03); OMPDC (3.67e-03, 2.62e-03)
dadp	dADP	dADP	Purine Metabolism	Nitrogen disposal	0.486035	NDPK8 (1.68e-03, 1.20e-03); NDPK8m (8.41e-04, 6.00e-04)
glu__L	L-glutamate(1-)	L-Glu	Glycine, Serine And Threonine Metabolism	AA central (A/D/E,G/S/T)	-9.79716	PSERT (4.20e-04, 3.74e-01)
akg	2-Oxoglutarate	Î±-KG	Valine, Leucine And Isoleucine Biosynthesis	BCAA metabolism (Val/Leu/Iso)	-0.224537	ILETA (3.73e-02, 4.10e-02); VALTA (2.56e-02, 3.26e-02)
pi	hydrogenphosphate	HPO4	Propanoate Metabolism	Propanoate Metabolism	0.417712	SUCOASm (1.19e+00, 8.66e-01); ACCOACm (9.04e-02, 0.00e+00); PPCOACm (6.29e-02, 7.35e-02); ACCOAC (0.00e+00, 6.46e-02)
dgsn	Deoxyguanosine	Deoxyguanosine	Purine Metabolism	Nitrogen disposal	0.486035	PUNP4 (1.72e-02, 1.22e-02); NTD8 (1.72e-02, 1.22e-02)
nadh	Nicotinamide adenine dinucleotide - reduced	NAD(+)	Arginine And Proline Metabolism	AA other (Cys/Met/Lys/Arg/Pro)	-6	PRO1xm (0.00e+00, 3.84e-02)
pyr	pyruvate	Pyr	Arginine Biosynthesis	AA other (Cys/Met/Lys/Arg/Pro)	0.486035	ALATA__L (2.19e-02, 1.56e-02)
h	proton	H	Fatty Acid Metabolism	Lipid metabolism	-0.0665056	ACCOACm (9.04e-02, 0.00e+00); ACCOAC (0.00e+00, 6.46e-02); HACD1m (6.46e-03, 3.69e-02)
atp	ATP	ATP/ADP	Fatty Acid Metabolism	Lipid metabolism	0.486035	ACCOACm (9.04e-02, 0.00e+00); ACCOAC (0.00e+00, 6.46e-02)
r1p	alpha-D-Ribose 1-phosphate	Alpha-D-Ribose 1-phosphate	Nucleotide Metabolism	Nucleotide metabolism	0.486035	PYNP2r (1.63e-02, 1.16e-02); PUNP1 (8.41e-04, 6.00e-04); PUNP3 (3.53e-04, 2.52e-04)
pi	hydrogenphosphate	HPO4	Pyruvate Metabolism	Central Energy Metabolism	1.23453	PCm (5.58e-01, 2.11e-01); ACCOACm (9.04e-02, 0.00e+00); ACCOAC (0.00e+00, 6.46e-02)
gtp	GTP	GTP	Purine Metabolism	Nitrogen disposal	0.486035	NDPK1 (4.11e-03, 2.93e-03); ADSS (3.24e-03, 2.32e-03)
f6p	D-Fructose 6-phosphate	D-Fructose 6-phosphate	Glycolysis/Gluconeogenesis	Central Energy Metabolism	-0.0013943	PGI (4.98e+00, 4.99e+00); PFK (4.98e+00, 4.99e+00)
o2	O2	O2	Transport, Mitochondrial	Mitochondrial transport	0.0723853	O2tm (3.27e+00, 3.11e+00)
acac	acetoacetate	Acetoacetate	Valine, Leucine And Isoleucine Degradation	BCAA metabolism (Val/Leu/Iso)	-2.51396	HMGLm (6.46e-03, 3.69e-02); AACOAT (6.46e-03, 3.69e-02)
akg	2-Oxoglutarate	Î±-KG	Taurine And Hypotaurine Metabolism	Taurine And Hypotaurine Metabolism	0.889128	GLUDxm (5.97e-01, 3.22e-01)
cbasp	N-Carbamoyl-L-aspartate	N-Carbamoyl-L-aspartate	Alanine, Aspartate And Glutamate Metabolism	AA central (A/D/E,G/S/T)	0.486035	ASPCTr (3.67e-03, 2.62e-03)
nadp	Nicotinamide adenine dinucleotide phosphate	NADP(+)	Tryptophan Metabolism	AAA metabolism (Trp/Phe/Tyr)	0.486035	KYN3OX (9.43e-03, 6.74e-03)
thf	5,6,7,8-Tetrahydrofolate	THF	Alanine, Aspartate And Glutamate Metabolism	AA central (A/D/E,G/S/T)	-9.79716	GHMT2rm (4.20e-04, 3.74e-01); GCC2bim (4.20e-04, 3.74e-01)
nad	Nicotinamide adenine dinucleotide	NAD(+)	Pyruvate Metabolism	Central Energy Metabolism	-0.202006	LDH__L (8.72e+00, 9.55e+00); MDH (3.39e-02, 5.28e-01)
akg	2-Oxoglutarate	Î±-KG	Lysine Biosynthesis	Lysine Biosynthesis	-2.51396	r0450 (6.46e-03, 3.69e-02)
10fthf	10-Formyltetrahydrofolate	10-Formyltetrahydrofolate	Purine Synthesis	Nucleotide metabolism	0.486035	GARFT (4.72e-03, 3.37e-03); AICART (4.72e-03, 3.37e-03)
pi	hydrogenphosphate	HPO4	Pyrimidine Catabolism	Nucleotide metabolism	0.486035	PYNP2r (1.63e-02, 1.16e-02); NTD2 (5.52e-03, 3.94e-03)
ctp	CTP	CTP	Nucleotide Metabolism	Nucleotide metabolism	0.486035	CTPS2 (1.29e-02, 9.24e-03); NDPK3m (1.50e-03, 1.07e-03)
pi	hydrogenphosphate	HPO4	Fatty Acid Biosynthesis	Lipid metabolism	0.486035	ACCOACm (9.04e-02, 0.00e+00); ACCOAC (0.00e+00, 6.46e-02)
cgly	L-cysteinylglycine	L-cysteinylglycine	Pseudoreactions	Pseudoreactions	6	EX_cgly_e (2.67e-02, 0.00e+00)
pyr	pyruvate	Pyr	Extracellular Transport	Extracellular Transport	6	PYRt2 (1.21e+00, 0.00e+00)
mmcoa_R	(R)-methylmalonyl-CoA(5-)	(R)-methylmalonyl-CoA(5-)	Propanoate Metabolism	Propanoate Metabolism	-0.224537	MMMm (6.29e-02, 7.35e-02); MMEm (6.29e-02, 7.35e-02)
pa_hs	phosphatidate(2-)	PhosphatidAte(2-)	Biomass And Maintenance Functions	Biomass And Maintenance Functions	0.486035	BIOMASS_maintenance (2.40e-02, 1.72e-02)
h	proton	H	Arginine Biosynthesis	AA other (Cys/Met/Lys/Arg/Pro)	0.886291	GLUDxm (5.97e-01, 3.22e-01); r0034 (3.67e-03, 2.62e-03)
dhor_S	(S)-dihydroorotate	(S)-dihydroorotate	Transport, Mitochondrial	Mitochondrial transport	0.486035	DHORD9 (3.67e-03, 2.62e-03)
amp	AMP	AMP	Pentose Phosphate Pathway	Redox & Pentose Metabolism	0.486035	PRPPS (2.59e-02, 1.85e-02)
sphmyln_hs	sphingomyelin betaine	Sphingomyelin betaine	Biomass And Maintenance Functions	Biomass And Maintenance Functions	0.486035	BIOMASS_maintenance (2.40e-02, 1.72e-02)
atp	ATP	ATP/ADP	Arginine Biosynthesis	AA other (Cys/Met/Lys/Arg/Pro)	0.486035	r0034 (3.67e-03, 2.62e-03)
3hbcoa	(S)-3-hydroxybutanoyl-CoA(4-)	SC acyl-CoA	Fatty Acid Metabolism	Lipid metabolism	-2.51396	HACD1m (6.46e-03, 3.69e-02); ECOAH1m (6.46e-03, 3.69e-02)
lys__L	L-lysinium(1+)	Lys	Extracellular Transport	Extracellular Transport	0.486035	ARGLYSex (1.40e-02, 1.00e-02); r1402 (6.17e-04, 4.41e-04)
lpam	lipoamide	Lipoamide	Glycolysis/Gluconeogenesis	Central Energy Metabolism	-2.82035	GCC2cm (6.34e-02, 4.48e-01)
val__L	L-valine	L-Val	Valine, Leucine And Isoleucine Degradation	BCAA metabolism (Val/Leu/Iso)	-0.347877	VALTA (2.56e-02, 3.26e-02)
adp	ADP	ATP/ADP	Fatty Acid Degradation	Lipid metabolism	0.486035	ACCOACm (9.04e-02, 0.00e+00); ACCOAC (0.00e+00, 6.46e-02)
h2o	Water	H2O	Nitrogen Metabolism	Nitrogen disposal	0.671742	r1418c (2.45e+00, 1.77e+00); r1418m (7.11e-01, 2.84e-01); GLUDxm (5.97e-01, 3.22e-01); r1418 (4.38e-02, 1.22e-02); r0034 (3.67e-03, 2.62e-03)
dad_2	Deoxyadenosine	dA	Purine Catabolism	Purine Catabolism	0.486035	PUNP2 (8.41e-04, 6.00e-04)
thf	5,6,7,8-Tetrahydrofolate	THF	Purine Synthesis	Nucleotide metabolism	0.486035	GARFT (4.72e-03, 3.37e-03); AICART (4.72e-03, 3.37e-03)
ctp	CTP	CTP	Pyrimidine Synthesis	Nucleotide metabolism	0.486035	CTPS2 (1.29e-02, 9.24e-03)
o2s	superoxide	Superoxide	Vitamin C Metabolism	Vitamin C Metabolism	0.0723853	ASCBOX (3.27e-02, 3.11e-02)
nadh	Nicotinamide adenine dinucleotide - reduced	NAD(+)	Alanine, Aspartate And Glutamate Metabolism	AA central (A/D/E,G/S/T)	-0.0709739	r0552m (2.21e+00, 2.22e+00); r0552 (1.27e+00, 1.32e+00); GLUDxm (5.97e-01, 3.22e-01); PGCD (4.20e-04, 3.74e-01); P5CDm (0.00e+00, 3.84e-02)
dtdp	dTDP	dTDP	Nucleotide Metabolism	Nucleotide metabolism	0.486035	NDPK4n (8.41e-04, 6.00e-04)
pser__L	O-Phospho-L-serine	O-Phospho-L-serine	Alanine, Aspartate And Glutamate Metabolism	AA central (A/D/E,G/S/T)	-9.79716	PSP__Lm (4.20e-04, 3.74e-01); PSERT (4.20e-04, 3.74e-01)
fum	Fumarate	Fumarate	Purine Metabolism	Nitrogen disposal	0.486035	ADSL2 (4.72e-03, 3.37e-03); ADSL1 (3.24e-03, 2.32e-03)
r5p	alpha-D-Ribose 5-phosphate	Alpha-D-Ribose 5-phosphate	Purine Metabolism	Nitrogen disposal	0.486035	PRPPS (2.59e-02, 1.85e-02); PPM (1.75e-02, 1.25e-02)
aicar	5-Amino-1-(5-Phospho-D-ribosyl)imidazole-4-carboxamide	5-Amino-1-(5-Phospho-D-ribosyl)imidAzole-4-carboxamide	Purine Metabolism	Nitrogen disposal	0.486035	ADSL2 (4.72e-03, 3.37e-03); AICART (4.72e-03, 3.37e-03)
glyc3p	Glycerol 3-phosphate	Glycerol 3-phosphate	Transport, Mitochondrial	Mitochondrial transport	0.486035	HUMANGEM_MAR08891 (1.95e-04, 1.39e-04)
gsn	Guanosine	Guanosine	Nucleotide Interconversion	Nucleotide metabolism	0.486035	NTD9m (3.53e-04, 2.52e-04)
2pg	D-Glycerate 2-phosphate	D-Glycerate 2-phosphate	Methane Metabolism	Methane Metabolism	0.0534468	ENO (9.96e+00, 9.60e+00); PGM (9.96e+00, 9.60e+00)
pyr	pyruvate	Pyr	Alanine, Aspartate And Glutamate Metabolism	AA central (A/D/E,G/S/T)	0.486035	ALATA__L (2.19e-02, 1.56e-02)
nh4	Ammonium	NH4	Taurine And Hypotaurine Metabolism	Taurine And Hypotaurine Metabolism	0.889128	GLUDxm (5.97e-01, 3.22e-01)
nadph	Nicotinamide adenine dinucleotide phosphate - reduced	NADP(+)	Glycine, Serine And Threonine Metabolism	AA central (A/D/E,G/S/T)	-0.0280119	r0553m (2.21e+00, 2.22e+00); r0553 (1.27e+00, 1.32e+00)
h2o	Water	H2O	Pentose Phosphate Pathway	Redox & Pentose Metabolism	0.486035	PGL (8.38e-03, 5.99e-03)
h	proton	H	Urea Cycle	Nitrogen disposal	0.486035	r0034 (3.67e-03, 2.62e-03)
dadp	dADP	dADP	Nucleotide Metabolism	Nucleotide metabolism	0.486035	NDPK8 (1.68e-03, 1.20e-03); NDPK8m (8.41e-04, 6.00e-04)
dgsn	Deoxyguanosine	Deoxyguanosine	Nucleotide Metabolism	Nucleotide metabolism	0.486035	PUNP4 (1.72e-02, 1.22e-02); NTD8 (1.72e-02, 1.22e-02)
h2o	Water	H2O	Folate Metabolism	Folate Metabolism	-0.835735	r0553 (1.27e+00, 1.32e+00); r0552 (1.27e+00, 1.32e+00); FTHFDHm (0.00e+00, 7.47e-01); MTHFCm (0.00e+00, 7.47e-01); GHMT2rm (4.20e-04, 3.74e-01)
thr__L	L-Threonine	L-Thr	Biomass And Maintenance Functions	Biomass And Maintenance Functions	0.486035	BIOMASS_maintenance (2.40e-02, 1.72e-02)
icit	Isocitrate	Isocitrate	Biosynthesis Of Amino Acids	Biosynthesis Of Amino Acids	1.40307	ACONTm (5.58e-01, 2.11e-01); ICDHxm (5.58e-01, 2.11e-01)
b2coa	crotonoyl-CoA(4-)	SC acyl-CoA	Fatty Acid Metabolism	Lipid metabolism	-2.51396	ECOAH1m (6.46e-03, 3.69e-02)
cbp	Carbamoyl phosphate	Carbamoyl phosphate	Alanine, Aspartate And Glutamate Metabolism	AA central (A/D/E,G/S/T)	0.486035	ASPCTr (3.67e-03, 2.62e-03); r0034 (3.67e-03, 2.62e-03)
atp	ATP	ATP/ADP	Urea Cycle	Nitrogen disposal	0.486035	r0034 (3.67e-03, 2.62e-03)
adp	ADP	ATP/ADP	Propanoate Metabolism	Propanoate Metabolism	0.417712	SUCOASm (1.19e+00, 8.66e-01); ACCOACm (9.04e-02, 0.00e+00); PPCOACm (6.29e-02, 7.35e-02); ACCOAC (0.00e+00, 6.46e-02)
dcamp	N6-(1,2-Dicarboxyethyl)-AMP	N6-(1,2-Dicarboxyethyl)-AMP	Purine Metabolism	Nitrogen disposal	0.486035	ADSL1 (3.24e-03, 2.32e-03); ADSS (3.24e-03, 2.32e-03)
leu__L	L-leucine	L-leucine	Biomass And Maintenance Functions	Biomass And Maintenance Functions	0.486035	BIOMASS_maintenance (2.40e-02, 1.72e-02)
lac__L	(S)-lactate	(S)-lactate	Transport, Endosomal	Transport, Endosomal	-0.129935	L__LACt2r (8.72e+00, 9.55e+00)
didp	dIDP	DIDP	Purine Metabolism	Nitrogen disposal	0.486035	NDPK10n (8.41e-04, 6.00e-04); NDPK10 (8.41e-04, 6.00e-04)
ctp	CTP	CTP	Glycerophospholipid Metabolism	Lipid metabolism	0.486035	CHLPCTD (1.16e-02, 8.26e-03); CDS (7.90e-04, 5.64e-04)
co2	carbon dioxide	CO2	Pyruvate Metabolism	Central Energy Metabolism	1.75653	ME2m (1.16e+00, 3.44e-01)
dhap	Dihydroxyacetone phosphate	DHAP	Glycerophospholipid Metabolism	Lipid metabolism	0.486035	r0202c (6.01e-03, 4.29e-03)
dtdp	dTDP	dTDP	Pyrimidine Synthesis	Nucleotide metabolism	0.486035	RE0452M (8.41e-04, 6.00e-04)
L2aadp6sa	L-allysine	L-allysine	Lysine Degradation	AA other (Cys/Met/Lys/Arg/Pro)	-2.51396	r0525 (6.46e-03, 3.69e-02)
gtp	GTP	GTP	Nucleotide Metabolism	Nucleotide metabolism	0.486035	NDPK1 (4.11e-03, 2.93e-03); ADSS (3.24e-03, 2.32e-03)
q10	ubiquinone-10	Ubiquinone-10	Citric Acid Cycle	Central Energy Metabolism	0.455985	r0509 (1.19e+00, 8.66e-01)
adp	ADP	ATP/ADP	Pyruvate Metabolism	Central Energy Metabolism	0.103593	PYK (9.96e+00, 9.60e+00); PCm (5.58e-01, 2.11e-01); ACCOACm (9.04e-02, 0.00e+00); ACCOAC (0.00e+00, 6.46e-02)
3php	3-phosphonatooxypyruvate(3-)	3-PHP	Alanine, Aspartate And Glutamate Metabolism	AA central (A/D/E,G/S/T)	-9.79716	PGCD (4.20e-04, 3.74e-01); PSERT (4.20e-04, 3.74e-01)
phe__L	L-phenylalanine	L-Phe	Biosynthesis Of Amino Acids	Biosynthesis Of Amino Acids	0.0761316	PHETA1m (9.96e+00, 9.45e+00); PHETA1 (9.96e+00, 9.45e+00)
dutp	dUTP	DUTP	Nucleotide Metabolism	Nucleotide metabolism	0.486035	NDPK6m (8.41e-04, 6.00e-04)
aicar	5-Amino-1-(5-Phospho-D-ribosyl)imidazole-4-carboxamide	5-Amino-1-(5-Phospho-D-ribosyl)imidAzole-4-carboxamide	Folate Metabolism	Folate Metabolism	0.486035	AICART (4.72e-03, 3.37e-03)
pgp_hs	phosphatidyl glycerol phosphate	Phosphatidyl glycerol phosphate	Glycerophospholipid Metabolism	Lipid metabolism	0.486035	PGPPTm (1.95e-04, 1.39e-04); PGPP_hs (1.95e-04, 1.39e-04)
sphmyln_hs	sphingomyelin betaine	Sphingomyelin betaine	Sphingolipid Metabolism	Lipid metabolism	0.486035	SMS (5.14e-04, 3.67e-04)
thf	5,6,7,8-Tetrahydrofolate	THF	Biosynthesis Of Amino Acids	Biosynthesis Of Amino Acids	-9.79716	GHMT2rm (4.20e-04, 3.74e-01)
h	proton	H	Alanine, Aspartate And Glutamate Metabolism	AA central (A/D/E,G/S/T)	-0.117937	r0552m (2.21e+00, 2.22e+00); r0553m (2.21e+00, 2.22e+00); r0553 (1.27e+00, 1.32e+00); r0552 (1.27e+00, 1.32e+00); GLUDxm (5.97e-01, 3.22e-01); PGCD (4.20e-04, 3.74e-01); GCC2am (4.20e-04, 3.74e-01); P5CDm (0.00e+00, 3.84e-02); ASPCTr (3.67e-03, 2.62e-03); r0034 (3.67e-03, 2.62e-03); ADSS (3.24e-03, 2.32e-03)
coa	Coenzyme A	CoA	Fatty Acid Degradation	Lipid metabolism	-2.51396	ACACT1r (6.46e-03, 3.69e-02)
dadp	dADP	dADP	Pyrimidine Synthesis	Nucleotide metabolism	0.486035	RE0452M (8.41e-04, 6.00e-04)
atp	ATP	ATP/ADP	Alanine, Aspartate And Glutamate Metabolism	AA central (A/D/E,G/S/T)	0.486035	r0034 (3.67e-03, 2.62e-03)
3php	3-phosphonatooxypyruvate(3-)	3-PHP	Cysteine And Methionine Metabolism	AA other (Cys/Met/Lys/Arg/Pro)	-9.79716	PGCD (4.20e-04, 3.74e-01); PSERT (4.20e-04, 3.74e-01)
amp	AMP	AMP	Valine, Leucine And Isoleucine Degradation	BCAA metabolism (Val/Leu/Iso)	-2.51396	AACOAT (6.46e-03, 3.69e-02)
co2	carbon dioxide	CO2	Fatty Acid Biosynthesis	Lipid metabolism	0.486035	FAS140COA (1.29e-02, 9.23e-03); FAS120COA (1.29e-02, 9.23e-03); FAS100COA (1.29e-02, 9.23e-03); FAS160COA (1.29e-02, 9.23e-03); FAS80COA__L (1.29e-02, 9.23e-03)
thf	5,6,7,8-Tetrahydrofolate	THF	Methane Metabolism	Methane Metabolism	-9.79716	GHMT2rm (4.20e-04, 3.74e-01)
h	proton	H	Cysteine And Methionine Metabolism	AA other (Cys/Met/Lys/Arg/Pro)	-9.79716	PGCD (4.20e-04, 3.74e-01)
mal__L	(S)-malate(2-)	(S)-malate(2-)	Transport, Mitochondrial	Mitochondrial transport	0.0916597	MALSO4tm (1.26e+01, 1.18e+01); MALtm (1.00e+01, 9.64e+00); AKGMALtm (9.98e+00, 9.12e+00)
adp	ADP	ATP/ADP	Fatty Acid Biosynthesis	Lipid metabolism	0.486035	ACCOACm (9.04e-02, 0.00e+00); ACCOAC (0.00e+00, 6.46e-02)
dump	dUMP	DUMP	Nucleotide Metabolism	Nucleotide metabolism	0.486035	URIDK2 (1.69e-02, 1.21e-02)
coa	Coenzyme A	CoA	Lysine Degradation	AA other (Cys/Met/Lys/Arg/Pro)	-2.51396	ACACT1r (6.46e-03, 3.69e-02)
gmp	GMP	GMP	Nucleotide Interconversion	Nucleotide metabolism	-0.135192	GMPR (1.06e+00, 1.17e+00); GK1 (1.86e-02, 1.33e-02); NTD9m (3.53e-04, 2.52e-04)
utp	UTP	UTP	Nucleotide Metabolism	Nucleotide metabolism	0.486035	CTPS2 (1.29e-02, 9.24e-03)
h	proton	H	Purine Synthesis	Nucleotide metabolism	0.486035	GARFT (4.72e-03, 3.37e-03); r0666 (4.72e-03, 3.37e-03); PRFGS (4.72e-03, 3.37e-03); PRAGSr (4.72e-03, 3.37e-03); PRASCS (4.72e-03, 3.37e-03); AIRCr (4.72e-03, 3.37e-03)
o2s	superoxide	Superoxide	Oxidative Phosphorylation	Oxidative Phosphorylation	0.0723853	CYOOm3 (3.27e+00, 3.11e+00)
ps_hs	phosphatidylserine	Phosphatidylserine	Extracellular Transport	Extracellular Transport	0.486035	PSFLIP (1.20e-03, 8.58e-04)
aacoa	Acetoacetyl-CoA	Acetoacetyl-CoA	Synthesis And Degradation Of Ketone Bodies	Lipid metabolism	-2.51396	HMGCOASim (6.46e-03, 3.69e-02)
nadph	Nicotinamide adenine dinucleotide phosphate - reduced	NADP(+)	Purine Catabolism	Purine Catabolism	-0.14353	r0276 (1.06e+00, 1.17e+00)
nadh	Nicotinamide adenine dinucleotide - reduced	NAD(+)	Tryptophan Metabolism	AAA metabolism (Trp/Phe/Tyr)	-2.51396	2OXOADOXm (6.46e-03, 3.69e-02); HACD1m (6.46e-03, 3.69e-02)
atp	ATP	ATP/ADP	Purine Synthesis	Nucleotide metabolism	0.486035	r0666 (4.72e-03, 3.37e-03); PRAGSr (4.72e-03, 3.37e-03); PRFGS (4.72e-03, 3.37e-03); PRASCS (4.72e-03, 3.37e-03)
dhlam	dihydrolipoamide	Dihydrolipoamide	Glycolysis/Gluconeogenesis	Central Energy Metabolism	-2.82035	GCC2cm (6.34e-02, 4.48e-01)
inost	myo-inositol	Myo-inositol	Extracellular Transport	Extracellular Transport	0.486035	INSTt2 (4.37e-04, 3.12e-04)
hco3	Bicarbonate	HCO3	Transport, Endoplasmic Reticulum	Transport, Endoplasmic Reticulum	0.486035	HUMANGEM_MAR06107 (2.33e-02, 1.66e-02)
nadh	Nicotinamide adenine dinucleotide - reduced	NAD(+)	Biosynthesis Of Amino Acids	Biosynthesis Of Amino Acids	-0.158944	ICDHxm (5.58e-01, 2.11e-01); PGCD (4.20e-04, 3.74e-01); PRO1xm (0.00e+00, 3.84e-02)
pser__L	O-Phospho-L-serine	O-Phospho-L-serine	Biosynthesis Of Amino Acids	Biosynthesis Of Amino Acids	-9.79716	PSERT (4.20e-04, 3.74e-01)
gar	N1-(5-Phospho-D-ribosyl)glycinamide	N1-(5-Phospho-D-ribosyl)glycinamide	Purine Synthesis	Nucleotide metabolism	0.486035	GARFT (4.72e-03, 3.37e-03); PRAGSr (4.72e-03, 3.37e-03)
coa	Coenzyme A	CoA	Propanoate Metabolism	Propanoate Metabolism	0.455985	SUCOASm (1.19e+00, 8.66e-01)
h2o	Water	H2O	Oxidative Phosphorylation	Oxidative Phosphorylation	0.0427425	ATPS4m (1.01e+01, 9.89e+00); CYOOm3 (3.27e+00, 3.11e+00); PPAm (2.76e-01, 2.29e-01)
mlthf	5,10-Methylenetetrahydrofolate	CH2-THF	Glyoxylate And Dicarboxylate Metabolism	Glyoxylate And Dicarboxylate Metabolism	-9.79716	GHMT2rm (4.20e-04, 3.74e-01)
pyr	pyruvate	Pyr	Biosynthesis Of Amino Acids	Biosynthesis Of Amino Acids	0.101408	PYK (9.96e+00, 9.60e+00); PCm (5.58e-01, 2.11e-01); ALATA__L (2.19e-02, 1.56e-02)
accoa	Acetyl-CoA	Acetyl-CoA	Citric Acid Cycle	Central Energy Metabolism	1.40307	CSm (5.58e-01, 2.11e-01)
fum	Fumarate	Fumarate	Nucleotide Metabolism	Nucleotide metabolism	0.486035	ADSL1 (3.24e-03, 2.32e-03)
pep	Phosphoenolpyruvate	Phosphoenolpyruvate	Glycolysis/Gluconeogenesis	Central Energy Metabolism	0.0534468	ENO (9.96e+00, 9.60e+00); PYK (9.96e+00, 9.60e+00)
h2o	Water	H2O	Valine, Leucine And Isoleucine Degradation	BCAA metabolism (Val/Leu/Iso)	-0.590239	ECOAH9m (3.73e-02, 4.10e-02); HMGCOASim (6.46e-03, 3.69e-02); 3HBCOAHLm (2.56e-02, 3.26e-02); ECOAH12m (2.56e-02, 3.26e-02)
uri	Uridine	Uridine	Nucleotide Metabolism	Nucleotide metabolism	0.486035	PYNP2r (1.63e-02, 1.16e-02); NTD2 (5.52e-03, 3.94e-03)
aacoa	Acetoacetyl-CoA	Acetoacetyl-CoA	Tryptophan Metabolism	AAA metabolism (Trp/Phe/Tyr)	-2.51396	ACACT1r (6.46e-03, 3.69e-02); HACD1m (6.46e-03, 3.69e-02)
ppcoa	Propanoyl-CoA	Propanoyl-CoA	Propanoate Metabolism	Propanoate Metabolism	-0.224537	PPCOACm (6.29e-02, 7.35e-02)
coa	Coenzyme A	CoA	Pyruvate Metabolism	Central Energy Metabolism	-2.51396	ACACT1r (6.46e-03, 3.69e-02)
utp	UTP	UTP	Pyrimidine Synthesis	Nucleotide metabolism	0.486035	CTPS2 (1.29e-02, 9.24e-03)
for	Formate	Formate	Folate Metabolism	Folate Metabolism	0.486035	FTHFL (9.43e-03, 6.74e-03)
betald	betaine aldehyde	Betaine aldehyde	Folate Metabolism	Folate Metabolism	-0.0654978	r0552 (1.27e+00, 1.32e+00); r0553 (1.27e+00, 1.32e+00)
hmgcoa	Hydroxymethylglutaryl-CoA	HMG-CoA	Terpenoid Backbone Biosynthesis	Terpenoid Backbone Biosynthesis	-2.51396	HMGCOASim (6.46e-03, 3.69e-02)
cbp	Carbamoyl phosphate	Carbamoyl phosphate	Biosynthesis Of Amino Acids	Biosynthesis Of Amino Acids	0.486035	r0034 (3.67e-03, 2.62e-03)
pi	hydrogenphosphate	HPO4	Nucleotide Interconversion	Nucleotide metabolism	0.486035	NTD8 (1.72e-02, 1.22e-02); DURIPP (1.63e-02, 1.16e-02); ADSS (3.24e-03, 2.32e-03); NTD7 (8.41e-04, 6.00e-04); PUNP1 (8.41e-04, 6.00e-04); NTD9m (3.53e-04, 2.52e-04)
val__L	L-valine	L-Val	Extracellular Transport	Extracellular Transport	0.00253262	VALtec (5.00e-02, 5.00e-02); r1402 (6.17e-04, 4.41e-04)
dcamp	N6-(1,2-Dicarboxyethyl)-AMP	N6-(1,2-Dicarboxyethyl)-AMP	Nucleotide Metabolism	Nucleotide metabolism	0.486035	ADSL1 (3.24e-03, 2.32e-03); ADSS (3.24e-03, 2.32e-03)
asp__L	L-aspartate(1-)	L-aspartate(1-)	Pyrimidine Metabolism	Nucleotide metabolism	0.486035	ASPCTr (3.67e-03, 2.62e-03)
co2	carbon dioxide	CO2	Sphingolipid Metabolism	Lipid metabolism	0.486035	SERPT (5.14e-04, 3.67e-04)
glyc3p	Glycerol 3-phosphate	Glycerol 3-phosphate	Triacylglycerol Synthesis	Lipid metabolism	0.486035	GPAM_hs (1.21e-02, 8.67e-03)
3php	3-phosphonatooxypyruvate(3-)	3-PHP	Biosynthesis Of Amino Acids	Biosynthesis Of Amino Acids	-9.79716	PGCD (4.20e-04, 3.74e-01); PSERT (4.20e-04, 3.74e-01)
pi	hydrogenphosphate	HPO4	Nitrogen Metabolism	Nitrogen disposal	0.486035	r0034 (3.67e-03, 2.62e-03)
dcmp	dCMP	dCMP	Pyrimidine Catabolism	Nucleotide metabolism	0.486035	DCMPDA (6.06e-04, 4.33e-04)
h	proton	H	Tryptophan Metabolism	AAA metabolism (Trp/Phe/Tyr)	-1.45712	r0541 (6.46e-03, 3.69e-02); HACD1m (6.46e-03, 3.69e-02); KYN3OX (9.43e-03, 6.74e-03); FKYNH (9.43e-03, 6.74e-03)
coa	Coenzyme A	CoA	Fatty Acid Biosynthesis	Lipid metabolism	0.486035	FAS160COA (1.29e-02, 9.23e-03); FAS140COA (1.29e-02, 9.23e-03); FAS100COA (1.29e-02, 9.23e-03); FAS120COA (1.29e-02, 9.23e-03); FAS80COA__L (1.29e-02, 9.23e-03)
2oxoadp	2-oxoadipate(2-)	Adipates	Lysine Biosynthesis	Lysine Biosynthesis	-2.51396	r0450 (6.46e-03, 3.69e-02)
h	proton	H	Biosynthesis Of Amino Acids	Biosynthesis Of Amino Acids	0.0873675	PYK (9.96e+00, 9.60e+00); PCm (5.58e-01, 2.11e-01); CSm (5.58e-01, 2.11e-01); PGCD (4.20e-04, 3.74e-01); PRO1xm (0.00e+00, 3.84e-02); PRPPS (2.59e-02, 1.85e-02); r0034 (3.67e-03, 2.62e-03)
3php	3-phosphonatooxypyruvate(3-)	3-PHP	Methane Metabolism	Methane Metabolism	-9.79716	PGCD (4.20e-04, 3.74e-01); PSERT (4.20e-04, 3.74e-01)
oaa	Oxaloacetate	Oxaloacetate	Arginine Biosynthesis	AA other (Cys/Met/Lys/Arg/Pro)	0.486035	ASPTA (3.36e-02, 2.40e-02)
atp	ATP	ATP/ADP	Biosynthesis Of Amino Acids	Biosynthesis Of Amino Acids	0.0505595	PGK (9.96e+00, 9.97e+00); PYK (9.96e+00, 9.60e+00); PCm (5.58e-01, 2.11e-01); PRPPS (2.59e-02, 1.85e-02); r0034 (3.67e-03, 2.62e-03)
pa_hs	phosphatidate(2-)	PhosphatidAte(2-)	Triacylglycerol Synthesis	Lipid metabolism	0.486035	AGPAT1 (1.21e-02, 8.67e-03)
h	proton	H	Methane Metabolism	Methane Metabolism	-4.71456	MDH (3.39e-02, 5.28e-01); PGCD (4.20e-04, 3.74e-01)
gly	Glycine	Glycine	Glyoxylate And Dicarboxylate Metabolism	Glyoxylate And Dicarboxylate Metabolism	-9.79716	GHMT2rm (4.20e-04, 3.74e-01)
nad	Nicotinamide adenine dinucleotide	NAD(+)	Nitrogen Metabolism	Nitrogen disposal	0.889128	GLUDxm (5.97e-01, 3.22e-01)
glu__L	L-glutamate(1-)	L-Glu	Lysine Biosynthesis	Lysine Biosynthesis	-2.51396	r0450 (6.46e-03, 3.69e-02)
pser__L	O-Phospho-L-serine	O-Phospho-L-serine	Transport, Mitochondrial	Mitochondrial transport	-9.79716	PSERtm (4.20e-04, 3.74e-01)
3pg	3-Phospho-D-glycerate	3-PG	Alanine, Aspartate And Glutamate Metabolism	AA central (A/D/E,G/S/T)	-9.79716	PGCD (4.20e-04, 3.74e-01)
hco3	Bicarbonate	HCO3	Valine, Leucine And Isoleucine Biosynthesis	BCAA metabolism (Val/Leu/Iso)	-0.224537	PPCOACm (6.29e-02, 7.35e-02)
accoa	Acetyl-CoA	Acetyl-CoA	2-oxocarboxylic Acid Metabolism	2-oxocarboxylic Acid Metabolism	1.61752	PDHm (6.11e-01, 1.70e-01); CSm (5.58e-01, 2.11e-01)
nadph	Nicotinamide adenine dinucleotide phosphate - reduced	NADP(+)	Pyruvate Metabolism	Central Energy Metabolism	1.75653	ME2m (1.16e+00, 3.44e-01)
pyr	pyruvate	Pyr	Transport, Mitochondrial	Mitochondrial transport	-2.51396	r1464 (6.46e-03, 3.69e-02)
pchol_hs	Phosphatidylcholine	Phosphatidylcholine	Extracellular Transport	Extracellular Transport	0.486035	PCt (6.33e-03, 4.52e-03)
akg	2-Oxoglutarate	Î±-KG	Citric Acid Cycle	Central Energy Metabolism	0.74591	AKGDm (1.13e+00, 7.93e-01); ICDHxm (5.58e-01, 2.11e-01)
nadh	Nicotinamide adenine dinucleotide - reduced	NAD(+)	Valine, Leucine And Isoleucine Biosynthesis	BCAA metabolism (Val/Leu/Iso)	-0.261291	HACD9m (3.73e-02, 4.10e-02); HIBDm (2.56e-02, 3.26e-02); MMSAD1m (2.56e-02, 3.26e-02)
pi	hydrogenphosphate	HPO4	Folate Metabolism	Folate Metabolism	0.486035	FTHFL (9.43e-03, 6.74e-03)
succoa	Succinyl-CoA	Succinyl-CoA	Propanoate Metabolism	Propanoate Metabolism	0.412896	SUCOASm (1.19e+00, 8.66e-01); MMMm (6.29e-02, 7.35e-02)
h2o	Water	H2O	Fatty Acid Metabolism	Lipid metabolism	-2.51396	ECOAH1m (6.46e-03, 3.69e-02)
pro__L	L-proline	L-Pro	Biomass And Maintenance Functions	Biomass And Maintenance Functions	0.486035	BIOMASS_maintenance (2.40e-02, 1.72e-02)
malcoa	Malonyl-CoA	Malonyl-CoA	Transport, Mitochondrial	Mitochondrial transport	6	MALCOAtm (9.04e-02, 0.00e+00)
pe_hs	Phosphatidylethanolamine (gallus gallus)	Phosphatidylethanolamine (gallus gallus)	Glycerophospholipid Metabolism	Lipid metabolism	0.486035	PSDm_hs (1.20e-03, 8.58e-04)
cbp	Carbamoyl phosphate	Carbamoyl phosphate	Transport, Mitochondrial	Mitochondrial transport	0.486035	HUMANGEM_MAR08651 (3.67e-03, 2.62e-03)
glyb	glycine betaine	Glycine betaine	Alanine, Aspartate And Glutamate Metabolism	AA central (A/D/E,G/S/T)	-0.0280119	r0553m (2.21e+00, 2.22e+00); r0552m (2.21e+00, 2.22e+00); r0552 (1.27e+00, 1.32e+00); r0553 (1.27e+00, 1.32e+00)
alpam	S-aminomethyldihydrolipoamide	S-aminomethyldihydrolipoamide	Glycine, Serine And Threonine Metabolism	AA central (A/D/E,G/S/T)	-9.79716	GCC2am (4.20e-04, 3.74e-01); GCC2bim (4.20e-04, 3.74e-01)
3hbcoa	(S)-3-hydroxybutanoyl-CoA(4-)	SC acyl-CoA	Tryptophan Metabolism	AAA metabolism (Trp/Phe/Tyr)	-2.51396	HACD1m (6.46e-03, 3.69e-02); ECOAH1m (6.46e-03, 3.69e-02)
nadph	Nicotinamide adenine dinucleotide phosphate - reduced	NADP(+)	Fatty Acid Biosynthesis	Lipid metabolism	0.486035	FAS140COA (1.29e-02, 9.23e-03); FAS100COA (1.29e-02, 9.23e-03); FAS120COA (1.29e-02, 9.23e-03); FAS160COA (1.29e-02, 9.23e-03); FAS80COA__L (1.29e-02, 9.23e-03)
akg	2-Oxoglutarate	Î±-KG	Lysine Metabolism	AA other (Cys/Met/Lys/Arg/Pro)	-2.51396	SACCD3m (6.46e-03, 3.69e-02); r0450 (6.46e-03, 3.69e-02)
mlthf	5,10-Methylenetetrahydrofolate	CH2-THF	Glycine, Serine And Threonine Metabolism	AA central (A/D/E,G/S/T)	-9.79716	GHMT2rm (4.20e-04, 3.74e-01); GCC2bim (4.20e-04, 3.74e-01)
trdox	Oxidized thioredoxin	Oxidized thioredoxin	Nucleotide Interconversion	Nucleotide metabolism	0.486035	RNDR2 (1.78e-02, 1.27e-02); r0475 (1.61e-02, 1.15e-02); TRDR (2.89e-03, 2.07e-03); RNDR3 (1.21e-03, 8.65e-04)
r1p	alpha-D-Ribose 1-phosphate	Alpha-D-Ribose 1-phosphate	Purine Catabolism	Purine Catabolism	0.486035	PUNP3 (3.53e-04, 2.52e-04)
2mb2coa	2-methylcrotonoyl-CoA(4-)	2-Methylcrotonoyl-CoA(4-)	Valine, Leucine And Isoleucine Degradation	BCAA metabolism (Val/Leu/Iso)	-0.133464	ECOAH9m (3.73e-02, 4.10e-02)
akg	2-Oxoglutarate	Î±-KG	Valine, Leucine And Isoleucine Degradation	BCAA metabolism (Val/Leu/Iso)	-0.224537	ILETA (3.73e-02, 4.10e-02); VALTA (2.56e-02, 3.26e-02)
nad	Nicotinamide adenine dinucleotide	NAD(+)	Folate Metabolism	Folate Metabolism	-0.711269	r0552 (1.27e+00, 1.32e+00); MTHFD2m (0.00e+00, 7.47e-01)
akg	2-Oxoglutarate	Î±-KG	Phenylalanine Metabolism	AAA metabolism (Trp/Phe/Tyr)	0.0761316	PHETA1m (9.96e+00, 9.45e+00); PHETA1 (9.96e+00, 9.45e+00)
prpp	5-Phospho-alpha-D-ribose 1-diphosphate	5-Phospho-alpha-D-ribose 1-diphosphate	Alanine, Aspartate And Glutamate Metabolism	AA central (A/D/E,G/S/T)	0.486035	GLUPRT (4.72e-03, 3.37e-03)
h2o2	Hydrogen peroxide	Hydrogen peroxide	Pseudoreactions	Pseudoreactions	0.0723853	EX_h2o2_e (6.54e-02, 6.22e-02)
nadh	Nicotinamide adenine dinucleotide - reduced	NAD(+)	Taurine And Hypotaurine Metabolism	Taurine And Hypotaurine Metabolism	0.889128	GLUDxm (5.97e-01, 3.22e-01)
accoa	Acetyl-CoA	Acetyl-CoA	Fatty Acid Metabolism	Lipid metabolism	-0.0665056	ACCOACm (9.04e-02, 0.00e+00); ACCOAC (0.00e+00, 6.46e-02); ACACT1r (6.46e-03, 3.69e-02)
amp	AMP	AMP	Extracellular Transport	Extracellular Transport	0.486035	r1402 (6.17e-04, 4.41e-04)
ade	Adenine	Adenine	Purine Catabolism	Purine Catabolism	0.486035	PUNP2 (8.41e-04, 6.00e-04)
dhdascb	dehydroascorbide(1-)	Dehydroascorbide(1-)	Ascorbate And Aldarate Metabolism	Ascorbate And Aldarate Metabolism	0.0723853	DASCBR (3.27e-02, 3.11e-02)
6pgl	6-phospho-D-glucono-1,5-lactone	6-Phospho-D-glucono-1,5-lactone	Pentose Phosphate Pathway	Redox & Pentose Metabolism	0.486035	PGL (8.38e-03, 5.99e-03); G6PDH2r (8.38e-03, 5.99e-03)
coa	Coenzyme A	CoA	Sphingolipid Metabolism	Lipid metabolism	0.486035	SERPT (5.14e-04, 3.67e-04); DSAT (5.14e-04, 3.67e-04)
dgtp	dGTP	dGTP	Nucleotide Interconversion	Nucleotide metabolism	0.486035	NDPK5 (6.06e-04, 4.33e-04)
h2o	Water	H2O	Arginine Biosynthesis	AA other (Cys/Met/Lys/Arg/Pro)	0.413557	GLUDxm (5.97e-01, 3.22e-01); GLUNm (4.63e-01, 4.74e-01); r0034 (3.67e-03, 2.62e-03)
ppi	Diphosphate	PPi	Nucleotide Interconversion	Nucleotide metabolism	0.486035	DUTPDPm (8.41e-04, 6.00e-04)
dhor_S	(S)-dihydroorotate	(S)-dihydroorotate	Pyrimidine Synthesis	Nucleotide metabolism	0.486035	DHORTS (3.67e-03, 2.62e-03)
h	proton	H	Valine, Leucine And Isoleucine Biosynthesis	BCAA metabolism (Val/Leu/Iso)	-0.239827	PPCOACm (6.29e-02, 7.35e-02); HACD9m (3.73e-02, 4.10e-02); r0670 (3.73e-02, 4.10e-02); 3HBCOAHLm (2.56e-02, 3.26e-02); HIBDm (2.56e-02, 3.26e-02); r0385 (2.56e-02, 3.26e-02)
ile__L	L-isoleucine	L-isoleucine	Valine, Leucine And Isoleucine Degradation	BCAA metabolism (Val/Leu/Iso)	-0.133464	ILETA (3.73e-02, 4.10e-02)
akg	2-Oxoglutarate	Î±-KG	2-oxocarboxylic Acid Metabolism	2-oxocarboxylic Acid Metabolism	0.115968	PHETA1m (9.96e+00, 9.45e+00); PHETA1 (9.96e+00, 9.45e+00); AKGDm (1.13e+00, 7.93e-01); ICDHxm (5.58e-01, 2.11e-01); ILETA (3.73e-02, 4.10e-02); r0450 (6.46e-03, 3.69e-02); ASPTA (3.36e-02, 2.40e-02); VALTA (2.56e-02, 3.26e-02); ALATA__L (2.19e-02, 1.56e-02)
ps_hs	phosphatidylserine	Phosphatidylserine	Biomass And Maintenance Functions	Biomass And Maintenance Functions	0.486035	BIOMASS_maintenance (2.40e-02, 1.72e-02)
h	proton	H	Terpenoid Backbone Biosynthesis	Terpenoid Backbone Biosynthesis	-2.51396	HMGCOASim (6.46e-03, 3.69e-02)
crm_hs	N-acylsphingosine	N-acylsphingosine	Sphingolipid Metabolism	Lipid metabolism	0.486035	RE2675C (5.14e-04, 3.67e-04); SMS (5.14e-04, 3.67e-04)
thf	5,6,7,8-Tetrahydrofolate	THF	Purine Metabolism	Nitrogen disposal	0.486035	GARFT (4.72e-03, 3.37e-03); AICART (4.72e-03, 3.37e-03)
3mob	3-methyl-2-oxobutanoate	Î±-Ketoisovalerate	Transport, Mitochondrial	Mitochondrial transport	-0.347877	3MOBt2im (2.56e-02, 3.26e-02)
atp	ATP	ATP/ADP	Valine, Leucine And Isoleucine Biosynthesis	BCAA metabolism (Val/Leu/Iso)	-0.224537	PPCOACm (6.29e-02, 7.35e-02)
prpp	5-Phospho-alpha-D-ribose 1-diphosphate	5-Phospho-alpha-D-ribose 1-diphosphate	Purine Synthesis	Nucleotide metabolism	0.486035	GLUPRT (4.72e-03, 3.37e-03)
adp	ADP	ATP/ADP	Nucleotide Interconversion	Nucleotide metabolism	0.311739	ADK1 (2.63e-01, 2.20e-01); GK1 (1.86e-02, 1.33e-02); DGK1 (1.72e-02, 1.22e-02); URIDK2 (1.69e-02, 1.21e-02); DURIK1 (1.63e-02, 1.16e-02); CYTDK1 (5.28e-03, 3.77e-03); NDPK1 (4.11e-03, 2.93e-03); NDPK8 (1.68e-03, 1.20e-03); NDPK3m (1.50e-03, 1.07e-03); CYTK1 (1.21e-03, 8.65e-04); NDPK6m (8.41e-04, 6.00e-04); NDPK8m (8.41e-04, 6.00e-04); NDPK4n (8.41e-04, 6.00e-04); DADNK (8.41e-04, 6.00e-04); NDPK…
2maacoa	2-methylacetoacetyl-CoA(4-)	2-Methylacetoacetyl-CoA(4-)	Valine, Leucine And Isoleucine Degradation	BCAA metabolism (Val/Leu/Iso)	-0.133464	ACACT10m (3.73e-02, 4.10e-02); HACD9m (3.73e-02, 4.10e-02)
co2	carbon dioxide	CO2	Nitrogen Metabolism	Nitrogen disposal	0.634679	r1418c (2.45e+00, 1.77e+00); r1418m (7.11e-01, 2.84e-01); r1418 (4.38e-02, 1.22e-02); r0034 (3.67e-03, 2.62e-03)
fprica	5-Formamido-1-(5-phospho-D-ribosyl)imidazole-4-carboxamide	5-Formamido-1-(5-phospho-D-ribosyl)imidAzole-4-carboxamide	Folate Metabolism	Folate Metabolism	0.486035	AICART (4.72e-03, 3.37e-03)
b2coa	crotonoyl-CoA(4-)	SC acyl-CoA	Tryptophan Metabolism	AAA metabolism (Trp/Phe/Tyr)	-2.51396	r0541 (6.46e-03, 3.69e-02); ECOAH1m (6.46e-03, 3.69e-02)
adp	ADP	ATP/ADP	Nitrogen Metabolism	Nitrogen disposal	0.486035	r0034 (3.67e-03, 2.62e-03)
g6p	D-Glucose 6-phosphate	D-Glucose 6-phosphate	Starch And Sucrose Metabolism	Starch And Sucrose Metabolism	4.92367e-13	HEX1 (5.00e+00, 5.00e+00)
btn	Biotin	Biotin	Extracellular Transport	Extracellular Transport	0.909616	BTNt4i (7.47e-02, 3.98e-02); BTNt2 (7.47e-02, 3.98e-02)
gly	Glycine	Glycine	Glycine, Serine And Threonine Metabolism	AA central (A/D/E,G/S/T)	-9.79716	GHMT2rm (4.20e-04, 3.74e-01); GCC2am (4.20e-04, 3.74e-01)
trdrd	Reduced thioredoxin	Reduced thioredoxin	Nucleotide Interconversion	Nucleotide metabolism	0.486035	RNDR2 (1.78e-02, 1.27e-02); r0475 (1.61e-02, 1.15e-02); TRDR (2.89e-03, 2.07e-03); RNDR3 (1.21e-03, 8.65e-04)
pi	hydrogenphosphate	HPO4	Glycolysis/Gluconeogenesis	Central Energy Metabolism	-0.00164391	GAPD (9.96e+00, 9.97e+00)
amp	AMP	AMP	Alanine, Aspartate And Glutamate Metabolism	AA central (A/D/E,G/S/T)	0.486035	ADSL1 (3.24e-03, 2.32e-03)
h	proton	H	Taurine And Hypotaurine Metabolism	Taurine And Hypotaurine Metabolism	0.889128	GLUDxm (5.97e-01, 3.22e-01)
duri	Deoxyuridine	Deoxyuridine	Nucleotide Interconversion	Nucleotide metabolism	0.486035	DURIPP (1.63e-02, 1.16e-02); DURIK1 (1.63e-02, 1.16e-02)
bilglcur	mono(glucosyluronic acid)bilirubin(2-)	Mono(glucosyluronic acid)bilirubin(2-)	Transport, Endoplasmic Reticulum	Transport, Endoplasmic Reticulum	0.486035	HUMANGEM_MAR06107 (2.33e-02, 1.66e-02); BILGLCURtr (2.33e-02, 1.66e-02)
3pg	3-Phospho-D-glycerate	3-PG	Biosynthesis Of Amino Acids	Biosynthesis Of Amino Acids	-0.00164391	PGK (9.96e+00, 9.97e+00); PGM (9.96e+00, 9.60e+00); PGCD (4.20e-04, 3.74e-01)
cdp	CDP	CDP	Nucleotide Interconversion	Nucleotide metabolism	0.486035	UMPK2m (1.85e-03, 1.32e-03); NDPK3m (1.50e-03, 1.07e-03); CYTK1 (1.21e-03, 8.65e-04); RNDR3 (1.21e-03, 8.65e-04); CYTK1m (3.53e-04, 2.52e-04)
orot	Orotate	Orotate	Pyrimidine Metabolism	Nucleotide metabolism	0.486035	ORPT (3.67e-03, 2.62e-03)
chsterol	cholesterol	Cholesterol	Extracellular Transport	Extracellular Transport	0.486035	CHOLESTle (6.33e-03, 4.52e-03); CHOLESTTDe (4.90e-04, 3.50e-04)
imp	IMP	IMP	Alanine, Aspartate And Glutamate Metabolism	AA central (A/D/E,G/S/T)	0.486035	ADSS (3.24e-03, 2.32e-03)
nadph	Nicotinamide adenine dinucleotide phosphate - reduced	NADP(+)	Sphingolipid Metabolism	Lipid metabolism	0.486035	3DSPHR (5.14e-04, 3.67e-04)
dhlam	dihydrolipoamide	Dihydrolipoamide	Glycine, Serine And Threonine Metabolism	AA central (A/D/E,G/S/T)	-9.79716	GCC2bim (4.20e-04, 3.74e-01)
val__L	L-valine	L-Val	Biosynthesis Of Amino Acids	Biosynthesis Of Amino Acids	-0.347877	VALTA (2.56e-02, 3.26e-02)
glu__L	L-glutamate(1-)	L-Glu	Nitrogen Metabolism	Nitrogen disposal	0.889128	GLUDxm (5.97e-01, 3.22e-01)
h2o	Water	H2O	Urea Cycle	Nitrogen disposal	0.486035	r0034 (3.67e-03, 2.62e-03)
nad	Nicotinamide adenine dinucleotide	NAD(+)	Oxidative Phosphorylation	Oxidative Phosphorylation	0.0104519	NADH2_u10m (5.28e+00, 5.24e+00)
co2	carbon dioxide	CO2	Folate Metabolism	Folate Metabolism	-6	FTHFDHm (0.00e+00, 7.47e-01)
nad	Nicotinamide adenine dinucleotide	NAD(+)	Valine, Leucine And Isoleucine Degradation	BCAA metabolism (Val/Leu/Iso)	-0.224537	HACD9m (3.73e-02, 4.10e-02); MMSAD1m (2.56e-02, 3.26e-02)
adp	ADP	ATP/ADP	Folate Metabolism	Folate Metabolism	0.486035	FTHFL (9.43e-03, 6.74e-03)
dgsn	Deoxyguanosine	Deoxyguanosine	Purine Catabolism	Purine Catabolism	0.486035	PUNP4 (1.72e-02, 1.22e-02)
ggn	primed glycogenin (glycogenin-8[1,4-Glc])	Primed glycogenin (glycogenin-8[1,4-Glc])	Starch And Sucrose Metabolism	Starch And Sucrose Metabolism	0.486035	GLGNS1 (6.17e-04, 4.41e-04)
dudp	dUDP	dUDP	Transport, Mitochondrial	Mitochondrial transport	0.486035	DNDPt14m (8.41e-04, 6.00e-04)
pram	5-Phospho-beta-D-ribosylamine	5-Phospho-beta-D-ribosylamine	Purine Metabolism	Nitrogen disposal	0.486035	GLUPRT (4.72e-03, 3.37e-03); PRAGSr (4.72e-03, 3.37e-03)
h	proton	H	Pyrimidine Metabolism	Nucleotide metabolism	0.486035	CTPS2 (1.29e-02, 9.24e-03); CYTDK1 (5.28e-03, 3.77e-03); ASPCTr (3.67e-03, 2.62e-03); OMPDC (3.67e-03, 2.62e-03)
3mop	3-methyl-2-oxopentanoate	3-Methyl-2-oxopentanoate	Valine, Leucine And Isoleucine Biosynthesis	BCAA metabolism (Val/Leu/Iso)	-0.133464	ILETA (3.73e-02, 4.10e-02); r0670 (3.73e-02, 4.10e-02)
prpp	5-Phospho-alpha-D-ribose 1-diphosphate	5-Phospho-alpha-D-ribose 1-diphosphate	Biosynthesis Of Amino Acids	Biosynthesis Of Amino Acids	0.486035	PRPPS (2.59e-02, 1.85e-02)
atp	ATP	ATP/ADP	Pyrimidine Metabolism	Nucleotide metabolism	0.486035	URIDK2 (1.69e-02, 1.21e-02); CTPS2 (1.29e-02, 9.24e-03); CYTDK1 (5.28e-03, 3.77e-03); NDPK3m (1.50e-03, 1.07e-03); CYTK1 (1.21e-03, 8.65e-04); NDPK6m (8.41e-04, 6.00e-04); NDPK4n (8.41e-04, 6.00e-04); CYTK1m (3.53e-04, 2.52e-04)
acac	acetoacetate	Acetoacetate	Transport, Mitochondrial	Mitochondrial transport	-2.51396	r1464 (6.46e-03, 3.69e-02)
imp	IMP	IMP	Purine Synthesis	Nucleotide metabolism	0.486035	IMPC (4.72e-03, 3.37e-03)
h	proton	H	Starch And Sucrose Metabolism	Starch And Sucrose Metabolism	5.09148e-05	HEX1 (5.00e+00, 5.00e+00); GLGNS1 (6.17e-04, 4.41e-04)
h2o	Water	H2O	Alanine, Aspartate And Glutamate Metabolism	AA central (A/D/E,G/S/T)	-0.11328	r0552m (2.21e+00, 2.22e+00); r0553m (2.21e+00, 2.22e+00); r0553 (1.27e+00, 1.32e+00); r0552 (1.27e+00, 1.32e+00); GLUDxm (5.97e-01, 3.22e-01); GLUNm (4.63e-01, 4.74e-01); GHMT2rm (4.20e-04, 3.74e-01); PSP__Lm (4.20e-04, 3.74e-01); P5CDm (0.00e+00, 3.84e-02); GLUPRT (4.72e-03, 3.37e-03); r0034 (3.67e-03, 2.62e-03)
o2	O2	O2	Pseudoreactions	Pseudoreactions	0.074505	EX_o2_e (3.29e+00, 3.12e+00)
mmcoa_R	(R)-methylmalonyl-CoA(5-)	(R)-methylmalonyl-CoA(5-)	Valine, Leucine And Isoleucine Degradation	BCAA metabolism (Val/Leu/Iso)	-0.224537	MMMm (6.29e-02, 7.35e-02); MMEm (6.29e-02, 7.35e-02)
pchol_hs	Phosphatidylcholine	Phosphatidylcholine	Biomass And Maintenance Functions	Biomass And Maintenance Functions	0.486035	BIOMASS_maintenance (2.40e-02, 1.72e-02)
Rtotal2coa	R total 2 coenzyme A	R total 2 coenzyme A	Fatty Acid Biosynthesis	Lipid metabolism	0.486035	ARTPLM2 (1.21e-02, 8.67e-03)
atp	ATP	ATP/ADP	Starch And Sucrose Metabolism	Starch And Sucrose Metabolism	4.92367e-13	HEX1 (5.00e+00, 5.00e+00)
akg	2-Oxoglutarate	Î±-KG	Arginine Biosynthesis	AA other (Cys/Met/Lys/Arg/Pro)	0.850163	GLUDxm (5.97e-01, 3.22e-01); ASPTA (3.36e-02, 2.40e-02); ALATA__L (2.19e-02, 1.56e-02)
nadp	Nicotinamide adenine dinucleotide phosphate	NADP(+)	Lysine Metabolism	AA other (Cys/Met/Lys/Arg/Pro)	-2.51396	SACCD3m (6.46e-03, 3.69e-02)
dcmp	dCMP	dCMP	Nucleotide Interconversion	Nucleotide metabolism	0.486035	CYTK12 (6.06e-04, 4.33e-04)
Rtotal	R total	R total	Glycerophospholipid Metabolism	Lipid metabolism	0.486035	LPASE (6.33e-03, 4.52e-03)
na1	Sodium	Sodium	Extracellular Transport	Extracellular Transport	0.21505	2HCO3_NAt (1.24e+00, 8.60e-01); GLNtN1 (4.83e-01, 5.00e-01); CAt7r (2.54e-03, 1.21e-01); GLUt4 (7.67e-02, 5.00e-02); PROt4 (1.63e-02, 5.00e-02); PIt9 (3.78e-02, 2.70e-02); SERt4 (3.16e-02, 2.26e-02); THRt4 (2.18e-02, 1.56e-02); ASNtN1 (1.20e-02, 8.55e-03); HIStN1 (8.57e-03, 6.12e-03)
nadh	Nicotinamide adenine dinucleotide - reduced	NAD(+)	Butanoate Metabolism	Butanoate Metabolism	-2.51396	HACD1m (6.46e-03, 3.69e-02)
h	proton	H	Pentose And Glucuronate Interconversions	Redox & Pentose Metabolism	0.486035	GALU (1.85e-03, 1.32e-03)
gthrd	Reduced glutathione	Reduced glutathione	Glutathione Metabolism	Redox & Pentose Metabolism	1.58863	r0130 (2.67e-02, 0.00e+00); r0129 (2.33e-02, 1.66e-02)
h2o	Water	H2O	Purine Synthesis	Nucleotide metabolism	0.486035	PRFGS (4.72e-03, 3.37e-03); GLUPRT (4.72e-03, 3.37e-03); IMPC (4.72e-03, 3.37e-03)
his__L	L-histidine	L-histidine	Extracellular Transport	Extracellular Transport	0.486035	HIStN1 (8.57e-03, 6.12e-03); r1402 (6.17e-04, 4.41e-04)
oaa	Oxaloacetate	Oxaloacetate	Methane Metabolism	Methane Metabolism	-3.9597	MDH (3.39e-02, 5.28e-01)
aacoa	Acetoacetyl-CoA	Acetoacetyl-CoA	Butanoate Metabolism	Butanoate Metabolism	-2.51396	AACOAT (6.46e-03, 3.69e-02); ACACT1r (6.46e-03, 3.69e-02); HACD1m (6.46e-03, 3.69e-02); HMGCOASim (6.46e-03, 3.69e-02)
ppi	Diphosphate	PPi	Oxidative Phosphorylation	Oxidative Phosphorylation	0.267136	PPAm (2.76e-01, 2.29e-01)
amp	AMP	AMP	Biosynthesis Of Amino Acids	Biosynthesis Of Amino Acids	0.486035	PRPPS (2.59e-02, 1.85e-02)
damp	dAMP(2-)	dAMP(2-)	Nucleotide Interconversion	Nucleotide metabolism	0.486035	ADKd (8.41e-04, 6.00e-04); DADNK (8.41e-04, 6.00e-04)
val__L	L-valine	L-Val	Valine, Leucine And Isoleucine Biosynthesis	BCAA metabolism (Val/Leu/Iso)	-0.347877	VALTA (2.56e-02, 3.26e-02)
co2	carbon dioxide	CO2	Glycolysis/Gluconeogenesis	Central Energy Metabolism	1.84576	PDHm (6.11e-01, 1.70e-01)
nad	Nicotinamide adenine dinucleotide	NAD(+)	Fatty Acid Metabolism	Lipid metabolism	-2.51396	HACD1m (6.46e-03, 3.69e-02)
ppi	Diphosphate	PPi	Valine, Leucine And Isoleucine Degradation	BCAA metabolism (Val/Leu/Iso)	-2.51396	AACOAT (6.46e-03, 3.69e-02)
adp	ADP	ATP/ADP	Glycolysis/Gluconeogenesis	Central Energy Metabolism	0.0167928	PGK (9.96e+00, 9.97e+00); PYK (9.96e+00, 9.60e+00); HEX1 (5.00e+00, 5.00e+00); PFK (4.98e+00, 4.99e+00)
ala__L	L-alanine	L-Ala	2-oxocarboxylic Acid Metabolism	2-oxocarboxylic Acid Metabolism	0.486035	ALATA__L (2.19e-02, 1.56e-02)
adp	ADP	ATP/ADP	Oxidative Phosphorylation	Oxidative Phosphorylation	0.0276149	ATPS4m (1.01e+01, 9.89e+00)
cbasp	N-Carbamoyl-L-aspartate	N-Carbamoyl-L-aspartate	Pyrimidine Synthesis	Nucleotide metabolism	0.486035	ASPCTr (3.67e-03, 2.62e-03); DHORTS (3.67e-03, 2.62e-03)
adp	ADP	ATP/ADP	Valine, Leucine And Isoleucine Degradation	BCAA metabolism (Val/Leu/Iso)	-0.224537	PPCOACm (6.29e-02, 7.35e-02)
h	proton	H	Butanoate Metabolism	Butanoate Metabolism	-2.51396	HMGCOASim (6.46e-03, 3.69e-02); HACD1m (6.46e-03, 3.69e-02)
ibcoa	isobutyryl-CoA(4-)	Isobutyryl-CoA(4-)	Valine, Leucine And Isoleucine Biosynthesis	BCAA metabolism (Val/Leu/Iso)	-0.347877	r0561 (2.56e-02, 3.26e-02); r0560 (2.56e-02, 3.26e-02)
2oxoadp	2-oxoadipate(2-)	Adipates	Lysine Metabolism	AA other (Cys/Met/Lys/Arg/Pro)	-2.51396	2OXOADOXm (6.46e-03, 3.69e-02); r0450 (6.46e-03, 3.69e-02)
atp	ATP	ATP/ADP	Butanoate Metabolism	Butanoate Metabolism	-2.51396	AACOAT (6.46e-03, 3.69e-02)
3hmp	3-hydroxy-2-methylpropanoate	3-Hydroxy-2-methylpropanoate	Valine, Leucine And Isoleucine Degradation	BCAA metabolism (Val/Leu/Iso)	-0.347877	3HBCOAHLm (2.56e-02, 3.26e-02)
air	5-amino-1-(5-phospho-D-ribosyl)imidazole	5-Amino-1-(5-phospho-D-ribosyl)imidAzole	Purine Metabolism	Nitrogen disposal	0.486035	AIRCr (4.72e-03, 3.37e-03)
L2aadp	L-2-aminoadipate(1-)	Adipates	Biosynthesis Of Amino Acids	Biosynthesis Of Amino Acids	-2.51396	r0450 (6.46e-03, 3.69e-02)
pi	hydrogenphosphate	HPO4	Pseudoreactions	Pseudoreactions	0.486035	EX_pi_e (3.78e-02, 2.70e-02)
met__L	L-methionine	L-Met	Pseudoreactions	Pseudoreactions	0.486035	EX_met__L_e (7.55e-03, 5.39e-03)
mal__L	(S)-malate(2-)	(S)-malate(2-)	Glyoxylate And Dicarboxylate Metabolism	Glyoxylate And Dicarboxylate Metabolism	-3.9597	MDH (3.39e-02, 5.28e-01)
dtmp	dTMP	dTMP	Nucleotide Interconversion	Nucleotide metabolism	0.486035	TMDSm (8.41e-04, 6.00e-04)
dcdp	dCDP	dCDP	Nucleotide Interconversion	Nucleotide metabolism	0.486035	RNDR3 (1.21e-03, 8.65e-04); CYTK12 (6.06e-04, 4.33e-04)
akg	2-Oxoglutarate	Î±-KG	Alanine, Aspartate And Glutamate Metabolism	AA central (A/D/E,G/S/T)	-0.172823	GLUDxm (5.97e-01, 3.22e-01); PSERT (4.20e-04, 3.74e-01); ASPTA (3.36e-02, 2.40e-02); ALATA__L (2.19e-02, 1.56e-02)
akg	2-Oxoglutarate	Î±-KG	Phenylalanine, Tyrosine And Tryptophan Biosynthesis	AAA metabolism (Trp/Phe/Tyr)	0.0761316	PHETA1m (9.96e+00, 9.45e+00); PHETA1 (9.96e+00, 9.45e+00)
h2o	Water	H2O	Tryptophan Metabolism	AAA metabolism (Trp/Phe/Tyr)	-0.716266	ECOAH1m (6.46e-03, 3.69e-02); KYN3OX (9.43e-03, 6.74e-03); FKYNH (9.43e-03, 6.74e-03); r0647 (9.43e-03, 6.74e-03)
nad	Nicotinamide adenine dinucleotide	NAD(+)	Arginine Biosynthesis	AA other (Cys/Met/Lys/Arg/Pro)	0.889128	GLUDxm (5.97e-01, 3.22e-01)
hmgcoa	Hydroxymethylglutaryl-CoA	HMG-CoA	Valine, Leucine And Isoleucine Degradation	BCAA metabolism (Val/Leu/Iso)	-2.51396	HMGLm (6.46e-03, 3.69e-02); HMGCOASim (6.46e-03, 3.69e-02)
accoa	Acetyl-CoA	Acetyl-CoA	Synthesis And Degradation Of Ketone Bodies	Lipid metabolism	-2.51396	HMGCOASim (6.46e-03, 3.69e-02)
sphgn	sphinganine(1+)	Sphinganine(1+)	Sphingolipid Metabolism	Lipid metabolism	0.486035	3DSPHR (5.14e-04, 3.67e-04); DSAT (5.14e-04, 3.67e-04)
25aics	(S)-2-[5-Amino-1-(5-phospho-D-ribosyl)imidazole-4-carboxamido]succinate	(S)-2-[5-Amino-1-(5-phospho-D-ribosyl)imidAzole-4-carboxamido]succinate	Purine Synthesis	Nucleotide metabolism	0.486035	PRASCS (4.72e-03, 3.37e-03); ADSL2 (4.72e-03, 3.37e-03)
h2o	Water	H2O	Biosynthesis Of Amino Acids	Biosynthesis Of Amino Acids	0.0469087	ENO (9.96e+00, 9.60e+00); CSm (5.58e-01, 2.11e-01); GHMT2rm (4.20e-04, 3.74e-01); r0034 (3.67e-03, 2.62e-03)
glu__L	L-glutamate(1-)	L-Glu	Valine, Leucine And Isoleucine Degradation	BCAA metabolism (Val/Leu/Iso)	-0.224537	ILETA (3.73e-02, 4.10e-02); VALTA (2.56e-02, 3.26e-02)
glu__L	L-glutamate(1-)	L-Glu	Phenylalanine Metabolism	AAA metabolism (Trp/Phe/Tyr)	0.0761316	PHETA1m (9.96e+00, 9.45e+00); PHETA1 (9.96e+00, 9.45e+00)
nadph	Nicotinamide adenine dinucleotide phosphate - reduced	NADP(+)	Pentose Phosphate Pathway	Redox & Pentose Metabolism	0.486035	GND (8.38e-03, 5.99e-03); G6PDH2r (8.38e-03, 5.99e-03)
chsterol	cholesterol	Cholesterol	Biomass And Maintenance Functions	Biomass And Maintenance Functions	0.486035	BIOMASS_maintenance (2.40e-02, 1.72e-02)
gdp	GDP	GDP	Alanine, Aspartate And Glutamate Metabolism	AA central (A/D/E,G/S/T)	0.486035	ADSS (3.24e-03, 2.32e-03)
nadph	Nicotinamide adenine dinucleotide phosphate - reduced	NADP(+)	Folate Metabolism	Folate Metabolism	-0.710729	r0553 (1.27e+00, 1.32e+00); FTHFDHm (0.00e+00, 7.47e-01); r0226 (8.41e-04, 6.00e-04)
h2o	Water	H2O	Methane Metabolism	Methane Metabolism	-0.00164391	ENO (9.96e+00, 9.60e+00); GHMT2rm (4.20e-04, 3.74e-01)
hco3	Bicarbonate	HCO3	Citric Acid Cycle	Central Energy Metabolism	1.40307	PCm (5.58e-01, 2.11e-01)
nh4	Ammonium	NH4	Extracellular Transport	Extracellular Transport	-0.143949	NH4t (1.06e+00, 1.17e+00)
3mob	3-methyl-2-oxobutanoate	Î±-Ketoisovalerate	Pantothenate And Coa Biosynthesis	Pantothenate And Coa Biosynthesis	-0.347877	VALTA (2.56e-02, 3.26e-02)
2oxoadp	2-oxoadipate(2-)	Adipates	2-oxocarboxylic Acid Metabolism	2-oxocarboxylic Acid Metabolism	-2.51396	2OXOADOXm (6.46e-03, 3.69e-02); r0450 (6.46e-03, 3.69e-02)
co2	carbon dioxide	CO2	Glycerophospholipid Metabolism	Lipid metabolism	0.486035	PSDm_hs (1.20e-03, 8.58e-04)
gly	Glycine	Glycine	Biomass And Maintenance Functions	Biomass And Maintenance Functions	0.486035	BIOMASS_maintenance (2.40e-02, 1.72e-02)
accoa	Acetyl-CoA	Acetyl-CoA	Tryptophan Metabolism	AAA metabolism (Trp/Phe/Tyr)	-2.51396	ACACT1r (6.46e-03, 3.69e-02)
pep	Phosphoenolpyruvate	Phosphoenolpyruvate	Methane Metabolism	Methane Metabolism	0.0534468	ENO (9.96e+00, 9.60e+00)
q10	ubiquinone-10	Ubiquinone-10	Transport, Mitochondrial	Mitochondrial transport	0.486035	DHORD9 (3.67e-03, 2.62e-03)
ump	UMP	UMP	Pyrimidine Catabolism	Nucleotide metabolism	0.486035	NTD2 (5.52e-03, 3.94e-03)
3hbcoa	(S)-3-hydroxybutanoyl-CoA(4-)	SC acyl-CoA	Butanoate Metabolism	Butanoate Metabolism	-2.51396	HACD1m (6.46e-03, 3.69e-02); ECOAH1m (6.46e-03, 3.69e-02)
nadh	Nicotinamide adenine dinucleotide - reduced	NAD(+)	Citric Acid Cycle	Central Energy Metabolism	0.164921	AKGDm (1.13e+00, 7.93e-01); ICDHxm (5.58e-01, 2.11e-01); MDH (3.39e-02, 5.28e-01)
imp	IMP	IMP	Transport, Mitochondrial	Mitochondrial transport	-0.14353	HUMANGEM_MAR20145 (1.06e+00, 1.17e+00)
accoa	Acetyl-CoA	Acetyl-CoA	Biosynthesis Of Amino Acids	Biosynthesis Of Amino Acids	1.40307	CSm (5.58e-01, 2.11e-01)
phe__L	L-phenylalanine	L-Phe	2-oxocarboxylic Acid Metabolism	2-oxocarboxylic Acid Metabolism	0.0761316	PHETA1m (9.96e+00, 9.45e+00); PHETA1 (9.96e+00, 9.45e+00)
pi	hydrogenphosphate	HPO4	Urea Cycle	Nitrogen disposal	0.486035	r0034 (3.67e-03, 2.62e-03)
udp	UDP	UDP	Transport, Mitochondrial	Mitochondrial transport	0.486035	HUMANGEM_MAR20147 (1.85e-03, 1.32e-03)
thf	5,6,7,8-Tetrahydrofolate	THF	Glyoxylate And Dicarboxylate Metabolism	Glyoxylate And Dicarboxylate Metabolism	-9.79716	GHMT2rm (4.20e-04, 3.74e-01)
coa	Coenzyme A	CoA	Glycolysis/Gluconeogenesis	Central Energy Metabolism	1.84576	PDHm (6.11e-01, 1.70e-01)
pe_hs	Phosphatidylethanolamine (gallus gallus)	Phosphatidylethanolamine (gallus gallus)	Transport, Endoplasmic Reticulum	Transport, Endoplasmic Reticulum	0.486035	PE_HSter (1.20e-03, 8.58e-04)
cdpdag_hs	CDP-diacylglycerol(2-)	CDP-diacylglycerol(2-)	Transport, Mitochondrial	Mitochondrial transport	0.486035	HUMANGEM_MAR00120 (3.53e-04, 2.52e-04)
dump	dUMP	DUMP	Pyrimidine Catabolism	Nucleotide metabolism	0.486035	DCMPDA (6.06e-04, 4.33e-04)
hco3	Bicarbonate	HCO3	Valine, Leucine And Isoleucine Degradation	BCAA metabolism (Val/Leu/Iso)	-0.224537	PPCOACm (6.29e-02, 7.35e-02)
ala__L	L-alanine	L-Ala	Arginine Biosynthesis	AA other (Cys/Met/Lys/Arg/Pro)	0.486035	ALATA__L (2.19e-02, 1.56e-02)
adp	ADP	ATP/ADP	Fatty Acid Metabolism	Lipid metabolism	0.486035	ACCOACm (9.04e-02, 0.00e+00); ACCOAC (0.00e+00, 6.46e-02)
cbp	Carbamoyl phosphate	Carbamoyl phosphate	Pyrimidine Synthesis	Nucleotide metabolism	0.486035	ASPCTr (3.67e-03, 2.62e-03)
coa	Coenzyme A	CoA	Valine, Leucine And Isoleucine Degradation	BCAA metabolism (Val/Leu/Iso)	-1.00657	ACACT10m (3.73e-02, 4.10e-02); HMGCOASim (6.46e-03, 3.69e-02); ACACT1r (6.46e-03, 3.69e-02); AACOAT (6.46e-03, 3.69e-02); 3HBCOAHLm (2.56e-02, 3.26e-02); MMSAD1m (2.56e-02, 3.26e-02)
fum	Fumarate	Fumarate	Pyruvate Metabolism	Central Energy Metabolism	0.106452	FUMm (1.38e+01, 1.27e+01); FUM (1.26e+01, 1.18e+01)
thr__L	L-Threonine	L-Thr	Pseudoreactions	Pseudoreactions	0.486035	EX_thr__L_e (2.18e-02, 1.56e-02)
nh4	Ammonium	NH4	Alanine, Aspartate And Glutamate Metabolism	AA central (A/D/E,G/S/T)	-0.140008	GLUDxm (5.97e-01, 3.22e-01); GLUNm (4.63e-01, 4.74e-01); GCC2bim (4.20e-04, 3.74e-01); r0034 (3.67e-03, 2.62e-03)
ppcoa	Propanoyl-CoA	Propanoyl-CoA	Valine, Leucine And Isoleucine Degradation	BCAA metabolism (Val/Leu/Iso)	-0.224537	PPCOACm (6.29e-02, 7.35e-02); ACACT10m (3.73e-02, 4.10e-02); MMSAD1m (2.56e-02, 3.26e-02)
leu__L	L-leucine	L-leucine	Pseudoreactions	Pseudoreactions	0.486035	EX_leu__L_e (3.52e-02, 2.51e-02)
asp__L	L-aspartate(1-)	L-aspartate(1-)	Arginine Biosynthesis	AA other (Cys/Met/Lys/Arg/Pro)	0.486035	ASPTA (3.36e-02, 2.40e-02)
dag_hs	diglyceride	Diglyceride	Triacylglycerol Synthesis	Lipid metabolism	0.486035	DGAT (2.60e-04, 1.86e-04)
acac	acetoacetate	Acetoacetate	Butanoate Metabolism	Butanoate Metabolism	-2.51396	HMGLm (6.46e-03, 3.69e-02); AACOAT (6.46e-03, 3.69e-02)
3hmbcoa	(2S,3S)-3-hydroxy-2-methylbutanoyl-CoA(4-)	(2S,3S)-3-hydroxy-2-methylbutanoyl-CoA(4-)	Valine, Leucine And Isoleucine Degradation	BCAA metabolism (Val/Leu/Iso)	-0.133464	HACD9m (3.73e-02, 4.10e-02); ECOAH9m (3.73e-02, 4.10e-02)
ser__L	L-serine	L-ser	Extracellular Transport	Extracellular Transport	0.486035	SERt4 (3.16e-02, 2.26e-02); r1402 (6.17e-04, 4.41e-04)
r1p	alpha-D-Ribose 1-phosphate	Alpha-D-Ribose 1-phosphate	Nucleotide Interconversion	Nucleotide metabolism	0.486035	PUNP1 (8.41e-04, 6.00e-04)
lys__L	L-lysinium(1+)	Lys	Lysine Metabolism	AA other (Cys/Met/Lys/Arg/Pro)	-2.51396	SACCD3m (6.46e-03, 3.69e-02)
dgdp	dGDP	dGDP	Nucleotide Interconversion	Nucleotide metabolism	0.486035	RNDR2 (1.78e-02, 1.27e-02); DGK1 (1.72e-02, 1.22e-02); NDPK5 (6.06e-04, 4.33e-04)
uri	Uridine	Uridine	Pyrimidine Catabolism	Nucleotide metabolism	0.486035	PYNP2r (1.63e-02, 1.16e-02); CYTDe (1.08e-02, 7.71e-03); NTD2 (5.52e-03, 3.94e-03)
h	proton	H	Citric Acid Cycle	Central Energy Metabolism	0.275407	PCm (5.58e-01, 2.11e-01); CSm (5.58e-01, 2.11e-01); MDH (3.39e-02, 5.28e-01)
b2coa	crotonoyl-CoA(4-)	SC acyl-CoA	Butanoate Metabolism	Butanoate Metabolism	-2.51396	ECOAH1m (6.46e-03, 3.69e-02)
nad	Nicotinamide adenine dinucleotide	NAD(+)	Alanine, Aspartate And Glutamate Metabolism	AA central (A/D/E,G/S/T)	-0.0709739	r0552m (2.21e+00, 2.22e+00); r0552 (1.27e+00, 1.32e+00); GLUDxm (5.97e-01, 3.22e-01); PGCD (4.20e-04, 3.74e-01); P5CDm (0.00e+00, 3.84e-02)
nadh	Nicotinamide adenine dinucleotide - reduced	NAD(+)	Glyoxylate And Dicarboxylate Metabolism	Glyoxylate And Dicarboxylate Metabolism	-3.9597	MDH (3.39e-02, 5.28e-01)
atp	ATP	ATP/ADP	Citric Acid Cycle	Central Energy Metabolism	0.69686	SUCOASm (1.19e+00, 8.66e-01); PCm (5.58e-01, 2.11e-01)
h2o	Water	H2O	Valine, Leucine And Isoleucine Biosynthesis	BCAA metabolism (Val/Leu/Iso)	-0.261291	ECOAH9m (3.73e-02, 4.10e-02); 3HBCOAHLm (2.56e-02, 3.26e-02); ECOAH12m (2.56e-02, 3.26e-02)
ala__L	L-alanine	L-Ala	Extracellular Transport	Extracellular Transport	0.486035	r1402 (6.17e-04, 4.41e-04)
akg	2-Oxoglutarate	Î±-KG	Tryptophan Metabolism	AAA metabolism (Trp/Phe/Tyr)	0.486035	3HKYNAKGAT (9.43e-03, 6.74e-03)
adp	ADP	ATP/ADP	Arginine Biosynthesis	AA other (Cys/Met/Lys/Arg/Pro)	0.486035	r0034 (3.67e-03, 2.62e-03)
h2o	Water	H2O	Terpenoid Backbone Biosynthesis	Terpenoid Backbone Biosynthesis	-2.51396	HMGCOASim (6.46e-03, 3.69e-02)
ade	Adenine	Adenine	Nucleotide Interconversion	Nucleotide metabolism	0.486035	PUNP1 (8.41e-04, 6.00e-04)
ump	UMP	UMP	Transport, Mitochondrial	Mitochondrial transport	0.486035	HUMANGEM_MAR20148 (1.85e-03, 1.32e-03)
co2	carbon dioxide	CO2	Pseudoreactions	Pseudoreactions	-0.659509	EX_co2_e (5.37e-01, 8.48e-01)
akg	2-Oxoglutarate	Î±-KG	Biosynthesis Of Amino Acids	Biosynthesis Of Amino Acids	0.0697267	PHETA1m (9.96e+00, 9.45e+00); PHETA1 (9.96e+00, 9.45e+00); ICDHxm (5.58e-01, 2.11e-01); PSERT (4.20e-04, 3.74e-01); ILETA (3.73e-02, 4.10e-02); r0450 (6.46e-03, 3.69e-02); ASPTA (3.36e-02, 2.40e-02); VALTA (2.56e-02, 3.26e-02); ALATA__L (2.19e-02, 1.56e-02)
udpg	UDPglucose	UDPglucose	Starch And Sucrose Metabolism	Starch And Sucrose Metabolism	0.486035	GLGNS1 (6.17e-04, 4.41e-04)
ctp	CTP	CTP	Nucleotide Interconversion	Nucleotide metabolism	0.486035	UMPK2m (1.85e-03, 1.32e-03); NDPK3m (1.50e-03, 1.07e-03)
gly	Glycine	Glycine	Cyanoamino Acid Metabolism	Cyanoamino Acid Metabolism	-9.79716	GHMT2rm (4.20e-04, 3.74e-01)
nad	Nicotinamide adenine dinucleotide	NAD(+)	Cysteine And Methionine Metabolism	AA other (Cys/Met/Lys/Arg/Pro)	-9.79716	PGCD (4.20e-04, 3.74e-01)
fgam	N2-Formyl-N1-(5-phospho-D-ribosyl)glycinamide	N2-Formyl-N1-(5-phospho-D-ribosyl)glycinamide	Purine Synthesis	Nucleotide metabolism	0.486035	GARFT (4.72e-03, 3.37e-03); PRFGS (4.72e-03, 3.37e-03)
h	proton	H	Lysine Metabolism	AA other (Cys/Met/Lys/Arg/Pro)	-2.51396	SACCD3m (6.46e-03, 3.69e-02); r0594m (6.46e-03, 3.69e-02); r0525 (6.46e-03, 3.69e-02)
asp__L	L-aspartate(1-)	L-aspartate(1-)	Extracellular Transport	Extracellular Transport	0.486035	r1402 (6.17e-04, 4.41e-04)
aacoa	Acetoacetyl-CoA	Acetoacetyl-CoA	Glyoxylate And Dicarboxylate Metabolism	Glyoxylate And Dicarboxylate Metabolism	-2.51396	ACACT1r (6.46e-03, 3.69e-02)
dgmp	dGMP	dGMP	Nucleotide Interconversion	Nucleotide metabolism	0.486035	NTD8 (1.72e-02, 1.22e-02); DGK1 (1.72e-02, 1.22e-02)
cys__L	L-cysteine	L-Cys	Extracellular Transport	Extracellular Transport	0.486035	CYSGLUexR (1.70e-02, 0.00e+00); CYStec (0.00e+00, 1.22e-02); r1402 (6.17e-04, 4.41e-04)
arg__L	L-argininium(1+)	Arg	Extracellular Transport	Extracellular Transport	0.486035	ARGLYSex (1.40e-02, 1.00e-02); r1402 (6.17e-04, 4.41e-04)
nadp	Nicotinamide adenine dinucleotide phosphate	NADP(+)	Alanine, Aspartate And Glutamate Metabolism	AA central (A/D/E,G/S/T)	-0.0280119	r0553m (2.21e+00, 2.22e+00); r0553 (1.27e+00, 1.32e+00)
h2o	Water	H2O	Taurine And Hypotaurine Metabolism	Taurine And Hypotaurine Metabolism	0.889128	GLUDxm (5.97e-01, 3.22e-01)
hco3	Bicarbonate	HCO3	Fatty Acid Metabolism	Lipid metabolism	0.486035	ACCOACm (9.04e-02, 0.00e+00); ACCOAC (0.00e+00, 6.46e-02)
glu__L	L-glutamate(1-)	L-Glu	Arginine Biosynthesis	AA other (Cys/Met/Lys/Arg/Pro)	0.41684	GLUDxm (5.97e-01, 3.22e-01); GLUNm (4.63e-01, 4.74e-01); ASPTA (3.36e-02, 2.40e-02); ALATA__L (2.19e-02, 1.56e-02)
ser__L	L-serine	L-ser	Alanine, Aspartate And Glutamate Metabolism	AA central (A/D/E,G/S/T)	-9.79716	PSP__Lm (4.20e-04, 3.74e-01); GHMT2rm (4.20e-04, 3.74e-01)
2mp2coa	2-Methylprop-2-enoyl-CoA	2-Methylprop-2-enoyl-CoA	Valine, Leucine And Isoleucine Degradation	BCAA metabolism (Val/Leu/Iso)	-0.347877	ECOAH12m (2.56e-02, 3.26e-02)
r1p	alpha-D-Ribose 1-phosphate	Alpha-D-Ribose 1-phosphate	Pentose Phosphate Pathway	Redox & Pentose Metabolism	0.486035	PPM (1.75e-02, 1.25e-02)
dgmp	dGMP	dGMP	Purine Metabolism	Nitrogen disposal	0.486035	NTD8 (1.72e-02, 1.22e-02)
coa	Coenzyme A	CoA	Fatty Acid Metabolism	Lipid metabolism	-2.51396	ACACT1r (6.46e-03, 3.69e-02)
ile__L	L-isoleucine	L-isoleucine	Biosynthesis Of Amino Acids	Biosynthesis Of Amino Acids	-0.133464	ILETA (3.73e-02, 4.10e-02)
succoa	Succinyl-CoA	Succinyl-CoA	Valine, Leucine And Isoleucine Degradation	BCAA metabolism (Val/Leu/Iso)	-0.224537	MMMm (6.29e-02, 7.35e-02)
udpg	UDPglucose	UDPglucose	Pentose And Glucuronate Interconversions	Redox & Pentose Metabolism	0.486035	GALU (1.85e-03, 1.32e-03)
dtdp	dTDP	dTDP	Transport, Nuclear	Transport, Nuclear	0.486035	DTDPtn (8.41e-04, 6.00e-04)
thf	5,6,7,8-Tetrahydrofolate	THF	Glycine, Serine And Threonine Metabolism	AA central (A/D/E,G/S/T)	-9.79716	GHMT2rm (4.20e-04, 3.74e-01); GCC2bim (4.20e-04, 3.74e-01)
udp	UDP	UDP	Starch And Sucrose Metabolism	Starch And Sucrose Metabolism	0.486035	GLGNS1 (6.17e-04, 4.41e-04)
ala__L	L-alanine	L-Ala	Alanine, Aspartate And Glutamate Metabolism	AA central (A/D/E,G/S/T)	0.486035	ALATA__L (2.19e-02, 1.56e-02)
lpchol_hs	lysophosphatidylcholine	Lysophosphatidylcholine	Glycerophospholipid Metabolism	Lipid metabolism	0.486035	LPASE (6.33e-03, 4.52e-03)
h	proton	H	Glyoxylate And Dicarboxylate Metabolism	Glyoxylate And Dicarboxylate Metabolism	-0.311393	CSm (5.58e-01, 2.11e-01); MDH (3.39e-02, 5.28e-01); PPCOACm (6.29e-02, 7.35e-02)
co2	carbon dioxide	CO2	Urea Cycle	Nitrogen disposal	0.486035	r0034 (3.67e-03, 2.62e-03)
h	proton	H	2-oxocarboxylic Acid Metabolism	2-oxocarboxylic Acid Metabolism	1.40307	CSm (5.58e-01, 2.11e-01)
atp	ATP	ATP/ADP	Glyoxylate And Dicarboxylate Metabolism	Glyoxylate And Dicarboxylate Metabolism	-0.224537	PPCOACm (6.29e-02, 7.35e-02)
adp	ADP	ATP/ADP	Urea Cycle	Nitrogen disposal	0.486035	r0034 (3.67e-03, 2.62e-03)
dtdp	dTDP	dTDP	Nucleotide Interconversion	Nucleotide metabolism	0.486035	NDPK4n (8.41e-04, 6.00e-04)
mlthf	5,10-Methylenetetrahydrofolate	CH2-THF	Nucleotide Interconversion	Nucleotide metabolism	0.486035	TMDSm (8.41e-04, 6.00e-04)
dhap	Dihydroxyacetone phosphate	DHAP	Pentose Phosphate Pathway	Redox & Pentose Metabolism	-0.0013943	FBA (4.98e+00, 4.99e+00)
nadp	Nicotinamide adenine dinucleotide phosphate	NADP(+)	Lysine Degradation	AA other (Cys/Met/Lys/Arg/Pro)	-2.51396	SACCD3m (6.46e-03, 3.69e-02)
asp__L	L-aspartate(1-)	L-aspartate(1-)	Alanine, Aspartate And Glutamate Metabolism	AA central (A/D/E,G/S/T)	0.486035	ASPTA (3.36e-02, 2.40e-02); ASPCTr (3.67e-03, 2.62e-03); ADSS (3.24e-03, 2.32e-03)
imp	IMP	IMP	Purine Metabolism	Nitrogen disposal	-0.141968	r0276 (1.06e+00, 1.17e+00); GMPR (1.06e+00, 1.17e+00); IMPC (4.72e-03, 3.37e-03); ADSS (3.24e-03, 2.32e-03)
h2o	Water	H2O	Pyrimidine Metabolism	Nucleotide metabolism	0.486035	CTPS2 (1.29e-02, 9.24e-03); NTD2 (5.52e-03, 3.94e-03)
phe__L	L-phenylalanine	L-Phe	Extracellular Transport	Extracellular Transport	0.486035	PHEtec (2.75e-02, 1.97e-02); TYRPHELAT2tc (1.12e-02, 7.97e-03); r1402 (6.17e-04, 4.41e-04)
akg	2-Oxoglutarate	Î±-KG	Transport, Mitochondrial	Mitochondrial transport	0.130331	AKGMALtm (9.98e+00, 9.12e+00)
nh4	Ammonium	NH4	Pyrimidine Catabolism	Nucleotide metabolism	0.486035	CYTDe (1.08e-02, 7.71e-03); DCMPDA (6.06e-04, 4.33e-04)
nh4	Ammonium	NH4	Biosynthesis Of Amino Acids	Biosynthesis Of Amino Acids	0.486035	r0034 (3.67e-03, 2.62e-03)
fprica	5-Formamido-1-(5-phospho-D-ribosyl)imidazole-4-carboxamide	5-Formamido-1-(5-phospho-D-ribosyl)imidAzole-4-carboxamide	Purine Synthesis	Nucleotide metabolism	0.486035	AICART (4.72e-03, 3.37e-03); IMPC (4.72e-03, 3.37e-03)
dgsn	Deoxyguanosine	Deoxyguanosine	Nucleotide Interconversion	Nucleotide metabolism	0.486035	NTD8 (1.72e-02, 1.22e-02)
saccrp__L	L-saccharopinate(1-)	L-saccharopinate(1-)	Lysine Metabolism	AA other (Cys/Met/Lys/Arg/Pro)	-2.51396	SACCD3m (6.46e-03, 3.69e-02); r0525 (6.46e-03, 3.69e-02)
gln__L	L-glutamine	L-Gln	Pseudoreactions	Pseudoreactions	-0.000114298	EX_gln__L_e (5.00e-01, 5.00e-01)
pi	hydrogenphosphate	HPO4	Transport, Endoplasmic Reticulum	Transport, Endoplasmic Reticulum	0.486035	PIter (3.67e-03, 2.62e-03)
3mop	3-methyl-2-oxopentanoate	3-Methyl-2-oxopentanoate	Valine, Leucine And Isoleucine Degradation	BCAA metabolism (Val/Leu/Iso)	-0.133464	ILETA (3.73e-02, 4.10e-02)
2mb2coa	2-methylcrotonoyl-CoA(4-)	2-Methylcrotonoyl-CoA(4-)	Valine, Leucine And Isoleucine Biosynthesis	BCAA metabolism (Val/Leu/Iso)	-0.133464	r0603 (3.73e-02, 4.10e-02); ECOAH9m (3.73e-02, 4.10e-02)
Rtotalcoa	R total Coenzyme A	R total Coenzyme A	Triacylglycerol Synthesis	Lipid metabolism	0.486035	GPAM_hs (1.21e-02, 8.67e-03)
nad	Nicotinamide adenine dinucleotide	NAD(+)	Tryptophan Metabolism	AAA metabolism (Trp/Phe/Tyr)	-2.51396	2OXOADOXm (6.46e-03, 3.69e-02); HACD1m (6.46e-03, 3.69e-02)
glc__D	D-glucose	Glc	Extracellular Transport	Extracellular Transport	4.91726e-13	GLCt1 (5.00e+00, 5.00e+00)
nadh	Nicotinamide adenine dinucleotide - reduced	NAD(+)	Glycine, Serine And Threonine Metabolism	AA central (A/D/E,G/S/T)	-0.172532	r0552m (2.21e+00, 2.22e+00); r0552 (1.27e+00, 1.32e+00); PGCD (4.20e-04, 3.74e-01)
pser__L	O-Phospho-L-serine	O-Phospho-L-serine	Glycine, Serine And Threonine Metabolism	AA central (A/D/E,G/S/T)	-9.79716	PSP__Lm (4.20e-04, 3.74e-01); PSERT (4.20e-04, 3.74e-01)
C02470	Xanthurenic acid	Xanthurenic acid	Pseudoreactions	Pseudoreactions	0.486035	EX_C02470_e (9.43e-03, 6.74e-03)
gtp	GTP	GTP	Nucleotide Interconversion	Nucleotide metabolism	0.486035	NDPK1 (4.11e-03, 2.93e-03); ADSS (3.24e-03, 2.32e-03)
nad	Nicotinamide adenine dinucleotide	NAD(+)	Biosynthesis Of Amino Acids	Biosynthesis Of Amino Acids	-0.158944	ICDHxm (5.58e-01, 2.11e-01); PGCD (4.20e-04, 3.74e-01); PRO1xm (0.00e+00, 3.84e-02)
amp	AMP	AMP	Butanoate Metabolism	Butanoate Metabolism	-2.51396	AACOAT (6.46e-03, 3.69e-02)
asp__L	L-aspartate(1-)	L-aspartate(1-)	Purine Synthesis	Nucleotide metabolism	0.486035	PRASCS (4.72e-03, 3.37e-03)
dutp	dUTP	DUTP	Nucleotide Interconversion	Nucleotide metabolism	0.486035	r0531 (1.61e-02, 1.15e-02); r0475 (1.61e-02, 1.15e-02); NDPK6m (8.41e-04, 6.00e-04); DUTPDPm (8.41e-04, 6.00e-04)
Rtotal3coa	R total 3 Coenzyme A	R total 3 Coenzyme A	Fatty Acid Biosynthesis	Lipid metabolism	0.486035	ARTPLM3 (2.60e-04, 1.86e-04)
dgdp	dGDP	dGDP	Nucleotide Metabolism	Nucleotide metabolism	0.486035	NDPK5 (6.06e-04, 4.33e-04)
ps_hs	phosphatidylserine	Phosphatidylserine	Glycerophospholipid Metabolism	Lipid metabolism	0.486035	PSSA1_hs (1.60e-03, 1.14e-03); PSDm_hs (1.20e-03, 8.58e-04)
nad	Nicotinamide adenine dinucleotide	NAD(+)	Methane Metabolism	Methane Metabolism	-4.71456	MDH (3.39e-02, 5.28e-01); PGCD (4.20e-04, 3.74e-01)
ppi	Diphosphate	PPi	Purine Synthesis	Nucleotide metabolism	0.486035	GLUPRT (4.72e-03, 3.37e-03)
mlthf	5,10-Methylenetetrahydrofolate	CH2-THF	Folate Metabolism	Folate Metabolism	-11.3814	MTHFD2m (0.00e+00, 7.47e-01); GHMT2rm (4.20e-04, 3.74e-01)
hco3	Bicarbonate	HCO3	Extracellular Transport	Extracellular Transport	0.524508	2HCO3_NAt (1.24e+00, 8.60e-01)
inost	myo-inositol	Myo-inositol	Glycerophospholipid Metabolism	Lipid metabolism	0.486035	CDIPTr (4.37e-04, 3.12e-04)
g3p	Glyceraldehyde 3-phosphate	G3P	Glycolysis/Gluconeogenesis	Central Energy Metabolism	-0.00172717	GAPD (9.96e+00, 9.97e+00); TPI (4.98e+00, 4.98e+00)
phe__L	L-phenylalanine	L-Phe	Phenylalanine, Tyrosine And Tryptophan Biosynthesis	AAA metabolism (Trp/Phe/Tyr)	0.0761316	PHETA1m (9.96e+00, 9.45e+00); PHETA1 (9.96e+00, 9.45e+00)
ump	UMP	UMP	Nucleotide Interconversion	Nucleotide metabolism	0.486035	UMPK2m (1.85e-03, 1.32e-03)
ade	Adenine	Adenine	Nucleotide Metabolism	Nucleotide metabolism	0.486035	PUNP2 (8.41e-04, 6.00e-04); PUNP1 (8.41e-04, 6.00e-04)
3mop	3-methyl-2-oxopentanoate	3-Methyl-2-oxopentanoate	2-oxocarboxylic Acid Metabolism	2-oxocarboxylic Acid Metabolism	-0.133464	ILETA (3.73e-02, 4.10e-02)
glu__L	L-glutamate(1-)	L-Glu	Alanine, Aspartate And Glutamate Metabolism	AA central (A/D/E,G/S/T)	-0.159105	GLUDxm (5.97e-01, 3.22e-01); GLUNm (4.63e-01, 4.74e-01); PSERT (4.20e-04, 3.74e-01); P5CDm (0.00e+00, 3.84e-02); ASPTA (3.36e-02, 2.40e-02); ALATA__L (2.19e-02, 1.56e-02); GLUPRT (4.72e-03, 3.37e-03)
ile__L	L-isoleucine	L-isoleucine	Valine, Leucine And Isoleucine Biosynthesis	BCAA metabolism (Val/Leu/Iso)	-0.133464	ILETA (3.73e-02, 4.10e-02)
adp	ADP	ATP/ADP	Purine Synthesis	Nucleotide metabolism	0.486035	r0666 (4.72e-03, 3.37e-03); PRFGS (4.72e-03, 3.37e-03); PRAGSr (4.72e-03, 3.37e-03); PRASCS (4.72e-03, 3.37e-03)
leu__L	L-leucine	L-leucine	Transport, Endosomal	Transport, Endosomal	0.486035	LEUtec (3.52e-02, 2.51e-02)
gly	Glycine	Glycine	Purine Metabolism	Nitrogen disposal	0.486035	PRAGSr (4.72e-03, 3.37e-03)
o2	O2	O2	Sphingolipid Metabolism	Lipid metabolism	0.486035	RE2675C (5.14e-04, 3.67e-04)
2maacoa	2-methylacetoacetyl-CoA(4-)	2-Methylacetoacetyl-CoA(4-)	Valine, Leucine And Isoleucine Biosynthesis	BCAA metabolism (Val/Leu/Iso)	-0.133464	ACACT10m (3.73e-02, 4.10e-02); HACD9m (3.73e-02, 4.10e-02)
dump	dUMP	DUMP	Nucleotide Interconversion	Nucleotide metabolism	0.486035	URIDK2 (1.69e-02, 1.21e-02); DURIK1 (1.63e-02, 1.16e-02); DUTPDPm (8.41e-04, 6.00e-04); TMDSm (8.41e-04, 6.00e-04)
ser__L	L-serine	L-ser	Biosynthesis Of Amino Acids	Biosynthesis Of Amino Acids	-9.79716	GHMT2rm (4.20e-04, 3.74e-01)
pro__L	L-proline	L-Pro	Pseudoreactions	Pseudoreactions	-1.61636	EX_pro__L_e (1.63e-02, 5.00e-02)
glu__L	L-glutamate(1-)	L-Glu	Cysteine And Methionine Metabolism	AA other (Cys/Met/Lys/Arg/Pro)	-9.79716	PSERT (4.20e-04, 3.74e-01)
utp	UTP	UTP	Nucleotide Interconversion	Nucleotide metabolism	0.486035	r0475 (1.61e-02, 1.15e-02)
dgmp	dGMP	dGMP	Nucleotide Metabolism	Nucleotide metabolism	0.486035	NTD8 (1.72e-02, 1.22e-02)
ser__L	L-serine	L-ser	Methane Metabolism	Methane Metabolism	-9.79716	GHMT2rm (4.20e-04, 3.74e-01)
h	proton	H	Arginine And Proline Metabolism	AA other (Cys/Met/Lys/Arg/Pro)	-6	PRO1xm (0.00e+00, 3.84e-02)
dhap	Dihydroxyacetone phosphate	DHAP	Glycolysis/Gluconeogenesis	Central Energy Metabolism	-0.00189377	TPI (4.98e+00, 4.98e+00)
ala__L	L-alanine	L-Ala	Biomass And Maintenance Functions	Biomass And Maintenance Functions	0.486035	BIOMASS_maintenance (2.40e-02, 1.72e-02)
ala__L	L-alanine	L-Ala	Biosynthesis Of Amino Acids	Biosynthesis Of Amino Acids	0.486035	ALATA__L (2.19e-02, 1.56e-02)
h2o	Water	H2O	Butanoate Metabolism	Butanoate Metabolism	-2.51396	ECOAH1m (6.46e-03, 3.69e-02); HMGCOASim (6.46e-03, 3.69e-02)
mal__L	(S)-malate(2-)	(S)-malate(2-)	Pyruvate Metabolism	Central Energy Metabolism	0.119999	FUMm (1.38e+01, 1.27e+01); FUM (1.26e+01, 1.18e+01); ME2m (1.16e+00, 3.44e-01); MDH (3.39e-02, 5.28e-01)
glu__L	L-glutamate(1-)	L-Glu	Purine Synthesis	Nucleotide metabolism	0.486035	PRFGS (4.72e-03, 3.37e-03); GLUPRT (4.72e-03, 3.37e-03)
h2o2	Hydrogen peroxide	Hydrogen peroxide	Vitamin C Metabolism	Vitamin C Metabolism	0.0723853	ASCBOX (3.27e-02, 3.11e-02)
pi	hydrogenphosphate	HPO4	Valine, Leucine And Isoleucine Biosynthesis	BCAA metabolism (Val/Leu/Iso)	-0.224537	PPCOACm (6.29e-02, 7.35e-02)
ggn	primed glycogenin (glycogenin-8[1,4-Glc])	Primed glycogenin (glycogenin-8[1,4-Glc])	Extracellular Transport	Extracellular Transport	0.486035	r1402 (6.17e-04, 4.41e-04)
asp__L	L-aspartate(1-)	L-aspartate(1-)	Biosynthesis Of Amino Acids	Biosynthesis Of Amino Acids	0.486035	ASPTA (3.36e-02, 2.40e-02)
g3pc	sn-Glycero-3-phosphocholine	Sn-Glycero-3-phosphocholine	Glycerophospholipid Metabolism	Lipid metabolism	0.486035	LPASE (6.33e-03, 4.52e-03); GPDDA1 (6.33e-03, 4.52e-03)
gly	Glycine	Glycine	Folate Metabolism	Folate Metabolism	-9.79716	GHMT2rm (4.20e-04, 3.74e-01)
fum	Fumarate	Fumarate	Nucleotide Interconversion	Nucleotide metabolism	0.486035	ADSL1 (3.24e-03, 2.32e-03)
1pyr5c	1-Pyrroline-5-carboxylate	P5C	Arginine And Proline Metabolism	AA other (Cys/Met/Lys/Arg/Pro)	-6	PRO1xm (0.00e+00, 3.84e-02)
2pg	D-Glycerate 2-phosphate	D-Glycerate 2-phosphate	Biosynthesis Of Amino Acids	Biosynthesis Of Amino Acids	0.0534468	ENO (9.96e+00, 9.60e+00); PGM (9.96e+00, 9.60e+00)
imp	IMP	IMP	Nucleotide Metabolism	Nucleotide metabolism	-0.143103	r0276 (1.06e+00, 1.17e+00); GMPR (1.06e+00, 1.17e+00); ADSS (3.24e-03, 2.32e-03)
arg__L	L-argininium(1+)	Arg	Biomass And Maintenance Functions	Biomass And Maintenance Functions	0.486035	BIOMASS_maintenance (2.40e-02, 1.72e-02)
h	proton	H	Extracellular Transport	Extracellular Transport	0.76032	PYRt2 (1.21e+00, 0.00e+00); OAAt_1 (3.83e-04, 5.04e-01); GLNtN1 (4.83e-01, 5.00e-01); BTNt2 (7.47e-02, 3.98e-02); BTNt4i (7.47e-02, 3.98e-02); ASNtN1 (1.20e-02, 8.55e-03); HIStN1 (8.57e-03, 6.12e-03); CHOLESTle (6.33e-03, 4.52e-03); PCt (6.33e-03, 4.52e-03); PSFLIP (1.20e-03, 8.58e-04); INSTt2 (4.37e-04, 3.12e-04)
accoa	Acetyl-CoA	Acetyl-CoA	Butanoate Metabolism	Butanoate Metabolism	-2.51396	HMGLm (6.46e-03, 3.69e-02); HMGCOASim (6.46e-03, 3.69e-02); ACACT1r (6.46e-03, 3.69e-02)
ru5p__D	D-ribulose 5-phosphate(2-)	D-ribulose 5-phosphate(2-)	Pentose Phosphate Pathway	Redox & Pentose Metabolism	0.486035	GND (8.38e-03, 5.99e-03); RPI (8.38e-03, 5.99e-03)
nad	Nicotinamide adenine dinucleotide	NAD(+)	Valine, Leucine And Isoleucine Biosynthesis	BCAA metabolism (Val/Leu/Iso)	-0.261291	HACD9m (3.73e-02, 4.10e-02); HIBDm (2.56e-02, 3.26e-02); MMSAD1m (2.56e-02, 3.26e-02)
val__L	L-valine	L-Val	2-oxocarboxylic Acid Metabolism	2-oxocarboxylic Acid Metabolism	-0.347877	VALTA (2.56e-02, 3.26e-02)
ppi	Diphosphate	PPi	Transport, Endoplasmic Reticulum	Transport, Endoplasmic Reticulum	0.486035	PPItr (3.67e-03, 2.62e-03)
oaa	Oxaloacetate	Oxaloacetate	Citric Acid Cycle	Central Energy Metabolism	0.275407	PCm (5.58e-01, 2.11e-01); CSm (5.58e-01, 2.11e-01); MDH (3.39e-02, 5.28e-01)
atp	ATP	ATP/ADP	Extracellular Transport	Extracellular Transport	0.486035	PCt (6.33e-03, 4.52e-03); PSFLIP (1.20e-03, 8.58e-04); r1402 (6.17e-04, 4.41e-04)
hmgcoa	Hydroxymethylglutaryl-CoA	HMG-CoA	Synthesis And Degradation Of Ketone Bodies	Lipid metabolism	-2.51396	HMGCOASim (6.46e-03, 3.69e-02)
succ	Succinate	Succinate	Propanoate Metabolism	Propanoate Metabolism	0.455985	SUCOASm (1.19e+00, 8.66e-01)
inost	myo-inositol	Myo-inositol	Pseudoreactions	Pseudoreactions	0.486035	EX_inost_e (4.37e-04, 3.12e-04)
nadh	Nicotinamide adenine dinucleotide - reduced	NAD(+)	Fatty Acid Degradation	Lipid metabolism	-2.51396	HACD1m (6.46e-03, 3.69e-02)
adp	ADP	ATP/ADP	Biosynthesis Of Amino Acids	Biosynthesis Of Amino Acids	0.0500844	PGK (9.96e+00, 9.97e+00); PYK (9.96e+00, 9.60e+00); PCm (5.58e-01, 2.11e-01); r0034 (3.67e-03, 2.62e-03)
pchol_hs	Phosphatidylcholine	Phosphatidylcholine	Glycerophospholipid Metabolism	Lipid metabolism	0.486035	CEPTC (1.16e-02, 8.26e-03); PSSA1_hs (1.60e-03, 1.14e-03)
dcamp	N6-(1,2-Dicarboxyethyl)-AMP	N6-(1,2-Dicarboxyethyl)-AMP	Nucleotide Interconversion	Nucleotide metabolism	0.486035	ADSL1 (3.24e-03, 2.32e-03); ADSS (3.24e-03, 2.32e-03)
didp	dIDP	DIDP	Nucleotide Interconversion	Nucleotide metabolism	0.486035	NDPK10n (8.41e-04, 6.00e-04); NDPK10 (8.41e-04, 6.00e-04)
2oxoadp	2-oxoadipate(2-)	Adipates	Tryptophan Metabolism	AAA metabolism (Trp/Phe/Tyr)	-2.51396	2OXOADOXm (6.46e-03, 3.69e-02)
gthrd	Reduced glutathione	Reduced glutathione	Pseudoreactions	Pseudoreactions	1.58863	EX_gthrd_e (5.00e-02, 1.66e-02)
2oxoadp	2-oxoadipate(2-)	Adipates	Biosynthesis Of Amino Acids	Biosynthesis Of Amino Acids	-2.51396	r0450 (6.46e-03, 3.69e-02)
cytd	Cytidine	Cytidine	Pyrimidine Catabolism	Nucleotide metabolism	0.486035	CYTDe (1.08e-02, 7.71e-03)
mmcoa_R	(R)-methylmalonyl-CoA(5-)	(R)-methylmalonyl-CoA(5-)	Valine, Leucine And Isoleucine Biosynthesis	BCAA metabolism (Val/Leu/Iso)	-0.224537	MMMm (6.29e-02, 7.35e-02); MMEm (6.29e-02, 7.35e-02)
nadh	Nicotinamide adenine dinucleotide - reduced	NAD(+)	Lysine Degradation	AA other (Cys/Met/Lys/Arg/Pro)	-2.51396	HACD1m (6.46e-03, 3.69e-02); r0525 (6.46e-03, 3.69e-02)
aacoa	Acetoacetyl-CoA	Acetoacetyl-CoA	Fatty Acid Degradation	Lipid metabolism	-2.51396	ACACT1r (6.46e-03, 3.69e-02); HACD1m (6.46e-03, 3.69e-02)
nad	Nicotinamide adenine dinucleotide	NAD(+)	Taurine And Hypotaurine Metabolism	Taurine And Hypotaurine Metabolism	0.889128	GLUDxm (5.97e-01, 3.22e-01)
gdp	GDP	GDP	Purine Metabolism	Nitrogen disposal	0.486035	GK1 (1.86e-02, 1.33e-02); NDPK1 (4.11e-03, 2.93e-03); ADSS (3.24e-03, 2.32e-03)
glu__L	L-glutamate(1-)	L-Glu	Tryptophan Metabolism	AAA metabolism (Trp/Phe/Tyr)	0.486035	3HKYNAKGAT (9.43e-03, 6.74e-03)
phe__L	L-phenylalanine	L-Phe	Biomass And Maintenance Functions	Biomass And Maintenance Functions	0.486035	BIOMASS_maintenance (2.40e-02, 1.72e-02)
r5p	alpha-D-Ribose 5-phosphate	Alpha-D-Ribose 5-phosphate	Pentose Phosphate Pathway	Redox & Pentose Metabolism	0.486035	PRPPS (2.59e-02, 1.85e-02); PPM (1.75e-02, 1.25e-02); RPI (8.38e-03, 5.99e-03)
nadph	Nicotinamide adenine dinucleotide phosphate - reduced	NADP(+)	Alanine, Aspartate And Glutamate Metabolism	AA central (A/D/E,G/S/T)	-0.0280119	r0553m (2.21e+00, 2.22e+00); r0553 (1.27e+00, 1.32e+00)
glu__L	L-glutamate(1-)	L-Glu	Biosynthesis Of Amino Acids	Biosynthesis Of Amino Acids	0.0457143	PHETA1m (9.96e+00, 9.45e+00); PHETA1 (9.96e+00, 9.45e+00); PSERT (4.20e-04, 3.74e-01); ILETA (3.73e-02, 4.10e-02); r0450 (6.46e-03, 3.69e-02); ASPTA (3.36e-02, 2.40e-02); VALTA (2.56e-02, 3.26e-02); ALATA__L (2.19e-02, 1.56e-02)
nadp	Nicotinamide adenine dinucleotide phosphate	NADP(+)	Glutathione Metabolism	Redox & Pentose Metabolism	0.486035	GND (8.38e-03, 5.99e-03)
dctp	dCTP	dCTP	Biomass And Maintenance Functions	Biomass And Maintenance Functions	0.486035	BIOMASS_maintenance (2.40e-02, 1.72e-02)
pi	hydrogenphosphate	HPO4	Pyrimidine Metabolism	Nucleotide metabolism	0.486035	PYNP2r (1.63e-02, 1.16e-02); CTPS2 (1.29e-02, 9.24e-03); NTD2 (5.52e-03, 3.94e-03); ASPCTr (3.67e-03, 2.62e-03)
aacoa	Acetoacetyl-CoA	Acetoacetyl-CoA	Lysine Degradation	AA other (Cys/Met/Lys/Arg/Pro)	-2.51396	ACACT1r (6.46e-03, 3.69e-02); HACD1m (6.46e-03, 3.69e-02)
lys__L	L-lysinium(1+)	Lys	Lysine Degradation	AA other (Cys/Met/Lys/Arg/Pro)	-2.51396	SACCD3m (6.46e-03, 3.69e-02)
glu__L	L-glutamate(1-)	L-Glu	Methane Metabolism	Methane Metabolism	-9.79716	PSERT (4.20e-04, 3.74e-01)
ump	UMP	UMP	Nucleotide Metabolism	Nucleotide metabolism	0.486035	NTD2 (5.52e-03, 3.94e-03)
methf	5,10-Methenyltetrahydrofolate	5,10-Methenyltetrahydrofolate	Folate Metabolism	Folate Metabolism	-6	MTHFD2m (0.00e+00, 7.47e-01); MTHFCm (0.00e+00, 7.47e-01)
oaa	Oxaloacetate	Oxaloacetate	Glyoxylate And Dicarboxylate Metabolism	Glyoxylate And Dicarboxylate Metabolism	-0.320331	CSm (5.58e-01, 2.11e-01); MDH (3.39e-02, 5.28e-01)
oaa	Oxaloacetate	Oxaloacetate	2-oxocarboxylic Acid Metabolism	2-oxocarboxylic Acid Metabolism	1.33215	CSm (5.58e-01, 2.11e-01); ASPTA (3.36e-02, 2.40e-02)
adn	Adenosine	Ado	Purine Metabolism	Nitrogen disposal	0.486035	NTD7 (8.41e-04, 6.00e-04); PUNP1 (8.41e-04, 6.00e-04)
nadh	Nicotinamide adenine dinucleotide - reduced	NAD(+)	Pyruvate Metabolism	Central Energy Metabolism	-0.202006	LDH__L (8.72e+00, 9.55e+00); MDH (3.39e-02, 5.28e-01)
1pyr5c	1-Pyrroline-5-carboxylate	P5C	Alanine, Aspartate And Glutamate Metabolism	AA central (A/D/E,G/S/T)	-6	P5CDm (0.00e+00, 3.84e-02)
h2o	Water	H2O	Citric Acid Cycle	Central Energy Metabolism	0.124291	FUMm (1.38e+01, 1.27e+01); FUM (1.26e+01, 1.18e+01); CSm (5.58e-01, 2.11e-01)
pyr	pyruvate	Pyr	Pyruvate Metabolism	Central Energy Metabolism	0.0507609	PYK (9.96e+00, 9.60e+00); LDH__L (8.72e+00, 9.55e+00); ME2m (1.16e+00, 3.44e-01); PCm (5.58e-01, 2.11e-01)
orot5p	Orotidine 5-phosphate	Orotidine 5-phosphate	Pyrimidine Metabolism	Nucleotide metabolism	0.486035	ORPT (3.67e-03, 2.62e-03); OMPDC (3.67e-03, 2.62e-03)
Lkynr	L-kynurenine	L-kynurenine	Tryptophan Metabolism	AAA metabolism (Trp/Phe/Tyr)	0.486035	KYN3OX (9.43e-03, 6.74e-03); FKYNH (9.43e-03, 6.74e-03)
h	proton	H	Lysine Degradation	AA other (Cys/Met/Lys/Arg/Pro)	-2.51396	SACCD3m (6.46e-03, 3.69e-02); HACD1m (6.46e-03, 3.69e-02); r0525 (6.46e-03, 3.69e-02)
akg	2-Oxoglutarate	Î±-KG	Pantothenate And Coa Biosynthesis	Pantothenate And Coa Biosynthesis	-0.347877	VALTA (2.56e-02, 3.26e-02)
coa	Coenzyme A	CoA	Tryptophan Metabolism	AAA metabolism (Trp/Phe/Tyr)	-2.51396	2OXOADOXm (6.46e-03, 3.69e-02); ACACT1r (6.46e-03, 3.69e-02)
3pg	3-Phospho-D-glycerate	3-PG	Glycine, Serine And Threonine Metabolism	AA central (A/D/E,G/S/T)	-0.00164391	PGM (9.96e+00, 9.60e+00); PGCD (4.20e-04, 3.74e-01)
hco3	Bicarbonate	HCO3	Biosynthesis Of Amino Acids	Biosynthesis Of Amino Acids	1.40307	PCm (5.58e-01, 2.11e-01)
nh4	Ammonium	NH4	Purine Metabolism	Nitrogen disposal	-0.143886	r0276 (1.06e+00, 1.17e+00); GMPR (1.06e+00, 1.17e+00)
L2aadp	L-2-aminoadipate(1-)	Adipates	Lysine Metabolism	AA other (Cys/Met/Lys/Arg/Pro)	-2.51396	r0450 (6.46e-03, 3.69e-02); r0594m (6.46e-03, 3.69e-02)
g6p	D-Glucose 6-phosphate	D-Glucose 6-phosphate	Biomass And Maintenance Functions	Biomass And Maintenance Functions	0.486035	BIOMASS_maintenance (2.40e-02, 1.72e-02)
cys__L	L-cysteine	L-Cys	Glutathione Metabolism	Redox & Pentose Metabolism	0.486035	AMPTASECG (2.33e-02, 1.66e-02)
aacoa	Acetoacetyl-CoA	Acetoacetyl-CoA	Pyruvate Metabolism	Central Energy Metabolism	-2.51396	ACACT1r (6.46e-03, 3.69e-02)
ump	UMP	UMP	Pyrimidine Synthesis	Nucleotide metabolism	0.486035	OMPDC (3.67e-03, 2.62e-03)
adp	ADP	ATP/ADP	Valine, Leucine And Isoleucine Biosynthesis	BCAA metabolism (Val/Leu/Iso)	-0.224537	PPCOACm (6.29e-02, 7.35e-02)
malcoa	Malonyl-CoA	Malonyl-CoA	Pyruvate Metabolism	Central Energy Metabolism	0.486035	ACCOACm (9.04e-02, 0.00e+00); ACCOAC (0.00e+00, 6.46e-02)
lpchol_hs	lysophosphatidylcholine	Lysophosphatidylcholine	Transport, Endosomal	Transport, Endosomal	0.486035	LPCHOLt (6.33e-03, 4.52e-03)
fdp	D-Fructose 1,6-bisphosphate	F1,6BP	Glycolysis/Gluconeogenesis	Central Energy Metabolism	-0.0013943	PFK (4.98e+00, 4.99e+00)
2mop	2-methyl-3-oxopropanoate	2-Methyl-3-oxopropanoate	Valine, Leucine And Isoleucine Biosynthesis	BCAA metabolism (Val/Leu/Iso)	-0.347877	HIBDm (2.56e-02, 3.26e-02); MMSAD1m (2.56e-02, 3.26e-02)
phe__L	L-phenylalanine	L-Phe	Transport, Mitochondrial	Mitochondrial transport	0.0761316	HUMANGEM_MAR05116 (9.96e+00, 9.45e+00)
h2o	Water	H2O	Lysine Metabolism	AA other (Cys/Met/Lys/Arg/Pro)	-2.51396	SACCD3m (6.46e-03, 3.69e-02); r0594m (6.46e-03, 3.69e-02); r0525 (6.46e-03, 3.69e-02)
3hmp	3-hydroxy-2-methylpropanoate	3-Hydroxy-2-methylpropanoate	Valine, Leucine And Isoleucine Biosynthesis	BCAA metabolism (Val/Leu/Iso)	-0.347877	3HBCOAHLm (2.56e-02, 3.26e-02); HIBDm (2.56e-02, 3.26e-02)
fpram	2-(Formamido)-N1-(5-phospho-D-ribosyl)acetamidine	2-(Formamido)-N1-(5-phospho-D-ribosyl)acetamidine	Purine Synthesis	Nucleotide metabolism	0.486035	r0666 (4.72e-03, 3.37e-03); PRFGS (4.72e-03, 3.37e-03)
glyb	glycine betaine	Glycine betaine	Glycine, Serine And Threonine Metabolism	AA central (A/D/E,G/S/T)	-0.0280119	r0553m (2.21e+00, 2.22e+00); r0552m (2.21e+00, 2.22e+00); r0552 (1.27e+00, 1.32e+00); r0553 (1.27e+00, 1.32e+00)
q10h2	Ubiquinol-10	Ubiquinol-10	Oxidative Phosphorylation	Oxidative Phosphorylation	0.0443934	CYOR_u10m (6.54e+00, 6.22e+00); NADH2_u10m (5.28e+00, 5.24e+00)
h	proton	H	Synthesis And Degradation Of Ketone Bodies	Lipid metabolism	-2.51396	HMGCOASim (6.46e-03, 3.69e-02)
lys__L	L-lysinium(1+)	Lys	Biomass And Maintenance Functions	Biomass And Maintenance Functions	0.486035	BIOMASS_maintenance (2.40e-02, 1.72e-02)
malcoa	Malonyl-CoA	Malonyl-CoA	Fatty Acid Biosynthesis	Lipid metabolism	0.486035	ACCOACm (9.04e-02, 0.00e+00); ACCOAC (0.00e+00, 6.46e-02); FAS140COA (1.29e-02, 9.23e-03); FAS120COA (1.29e-02, 9.23e-03); FAS160COA (1.29e-02, 9.23e-03); FAS100COA (1.29e-02, 9.23e-03); FAS80COA__L (1.29e-02, 9.23e-03)
thf	5,6,7,8-Tetrahydrofolate	THF	Cyanoamino Acid Metabolism	Cyanoamino Acid Metabolism	-9.79716	GHMT2rm (4.20e-04, 3.74e-01)
L2aadp	L-2-aminoadipate(1-)	Adipates	2-oxocarboxylic Acid Metabolism	2-oxocarboxylic Acid Metabolism	-2.51396	r0450 (6.46e-03, 3.69e-02)
glu__L	L-glutamate(1-)	L-Glu	Valine, Leucine And Isoleucine Biosynthesis	BCAA metabolism (Val/Leu/Iso)	-0.224537	ILETA (3.73e-02, 4.10e-02); VALTA (2.56e-02, 3.26e-02)
acac	acetoacetate	Acetoacetate	Cholesterol Metabolism	Lipid metabolism	-2.51396	HMGLm (6.46e-03, 3.69e-02)
dttp	dTTP	dTTP	Biomass And Maintenance Functions	Biomass And Maintenance Functions	0.486035	BIOMASS_maintenance (2.40e-02, 1.72e-02)
didp	dIDP	DIDP	Nucleotide Metabolism	Nucleotide metabolism	0.486035	NDPK10n (8.41e-04, 6.00e-04); NDPK10 (8.41e-04, 6.00e-04)
3hbcoa	(S)-3-hydroxybutanoyl-CoA(4-)	SC acyl-CoA	Lysine Degradation	AA other (Cys/Met/Lys/Arg/Pro)	-2.51396	HACD1m (6.46e-03, 3.69e-02); ECOAH1m (6.46e-03, 3.69e-02)
nadph	Nicotinamide adenine dinucleotide phosphate - reduced	NADP(+)	Tryptophan Metabolism	AAA metabolism (Trp/Phe/Tyr)	0.486035	KYN3OX (9.43e-03, 6.74e-03)
h2o	Water	H2O	Glyoxylate And Dicarboxylate Metabolism	Glyoxylate And Dicarboxylate Metabolism	-0.0673143	CSm (5.58e-01, 2.11e-01); GHMT2rm (4.20e-04, 3.74e-01)
h2o	Water	H2O	2-oxocarboxylic Acid Metabolism	2-oxocarboxylic Acid Metabolism	1.40307	CSm (5.58e-01, 2.11e-01)
nadp	Nicotinamide adenine dinucleotide phosphate	NADP(+)	Purine Metabolism	Nitrogen disposal	-0.143886	r0276 (1.06e+00, 1.17e+00); GMPR (1.06e+00, 1.17e+00)
mmcoa_S	(S)-methylmalonyl-CoA(5-)	(S)-methylmalonyl-CoA(5-)	Valine, Leucine And Isoleucine Degradation	BCAA metabolism (Val/Leu/Iso)	-0.224537	PPCOACm (6.29e-02, 7.35e-02); MMEm (6.29e-02, 7.35e-02)
h	proton	H	Biomass And Maintenance Functions	Biomass And Maintenance Functions	0.000535191	ATPM (1.85e+01, 1.85e+01); BIOMASS_maintenance (2.40e-02, 1.72e-02)
h	proton	H	Pyrimidine Catabolism	Nucleotide metabolism	0.486035	CYTDe (1.08e-02, 7.71e-03); DCMPDA (6.06e-04, 4.33e-04)
nadp	Nicotinamide adenine dinucleotide phosphate	NADP(+)	Ascorbate And Aldarate Metabolism	Ascorbate And Aldarate Metabolism	0.0723853	DASCBR (3.27e-02, 3.11e-02)
ppi	Diphosphate	PPi	Pyrimidine Metabolism	Nucleotide metabolism	0.486035	ORPT (3.67e-03, 2.62e-03)
saccrp__L	L-saccharopinate(1-)	L-saccharopinate(1-)	Lysine Degradation	AA other (Cys/Met/Lys/Arg/Pro)	-2.51396	SACCD3m (6.46e-03, 3.69e-02); r0525 (6.46e-03, 3.69e-02)
hLkynr	3-hydroxy-L-kynurenine	3-Hydroxy-L-kynurenine	Tryptophan Metabolism	AAA metabolism (Trp/Phe/Tyr)	0.486035	KYN3OX (9.43e-03, 6.74e-03); 3HKYNAKGAT (9.43e-03, 6.74e-03)
atp	ATP	ATP/ADP	Biomass And Maintenance Functions	Biomass And Maintenance Functions	0.000535191	ATPM (1.85e+01, 1.85e+01); BIOMASS_maintenance (2.40e-02, 1.72e-02)
co2	carbon dioxide	CO2	Pyrimidine Metabolism	Nucleotide metabolism	0.486035	OMPDC (3.67e-03, 2.62e-03)
glu__L	L-glutamate(1-)	L-Glu	Taurine And Hypotaurine Metabolism	Taurine And Hypotaurine Metabolism	0.889128	GLUDxm (5.97e-01, 3.22e-01)
nad	Nicotinamide adenine dinucleotide	NAD(+)	Butanoate Metabolism	Butanoate Metabolism	-2.51396	HACD1m (6.46e-03, 3.69e-02)
chol	Choline	Choline	Glycerophospholipid Metabolism	Lipid metabolism	0.486035	CHOLK (1.16e-02, 8.26e-03); GPDDA1 (6.33e-03, 4.52e-03); PSSA1_hs (1.60e-03, 1.14e-03)
adp	ADP	ATP/ADP	Pyrimidine Metabolism	Nucleotide metabolism	0.486035	URIDK2 (1.69e-02, 1.21e-02); CTPS2 (1.29e-02, 9.24e-03); CYTDK1 (5.28e-03, 3.77e-03); NDPK3m (1.50e-03, 1.07e-03); CYTK1 (1.21e-03, 8.65e-04); NDPK6m (8.41e-04, 6.00e-04); NDPK4n (8.41e-04, 6.00e-04); CYTK1m (3.53e-04, 2.52e-04)
accoa	Acetyl-CoA	Acetyl-CoA	Glyoxylate And Dicarboxylate Metabolism	Glyoxylate And Dicarboxylate Metabolism	1.18709	CSm (5.58e-01, 2.11e-01); ACACT1r (6.46e-03, 3.69e-02)
b2coa	crotonoyl-CoA(4-)	SC acyl-CoA	Fatty Acid Degradation	Lipid metabolism	-2.51396	ECOAH1m (6.46e-03, 3.69e-02)
1pyr5c	1-Pyrroline-5-carboxylate	P5C	Biosynthesis Of Amino Acids	Biosynthesis Of Amino Acids	-6	PRO1xm (0.00e+00, 3.84e-02)
coa	Coenzyme A	CoA	Valine, Leucine And Isoleucine Biosynthesis	BCAA metabolism (Val/Leu/Iso)	-0.246133	ACACT10m (3.73e-02, 4.10e-02); r0604 (3.73e-02, 4.10e-02); 3HBCOAHLm (2.56e-02, 3.26e-02); MMSAD1m (2.56e-02, 3.26e-02); r0561 (2.56e-02, 3.26e-02)
adp	ADP	ATP/ADP	Starch And Sucrose Metabolism	Starch And Sucrose Metabolism	4.92367e-13	HEX1 (5.00e+00, 5.00e+00)
ddcacoa	Dodecanoyl-CoA (n-C12:0CoA)	Dodecanoyl-CoA (n-C12:0CoA)	Fatty Acid Biosynthesis	Lipid metabolism	0.486035	FAS140COA (1.29e-02, 9.23e-03); FAS120COA (1.29e-02, 9.23e-03)
coa	Coenzyme A	CoA	Terpenoid Backbone Biosynthesis	Terpenoid Backbone Biosynthesis	-2.51396	HMGCOASim (6.46e-03, 3.69e-02); ACACT1r (6.46e-03, 3.69e-02)
nadh	Nicotinamide adenine dinucleotide - reduced	NAD(+)	Sphingolipid Metabolism	Lipid metabolism	0.486035	RE2675C (5.14e-04, 3.67e-04)
o2	O2	O2	Oxidative Phosphorylation	Oxidative Phosphorylation	0.0723853	CYOOm3 (3.27e+00, 3.11e+00)
lys__L	L-lysinium(1+)	Lys	Transport, Mitochondrial	Mitochondrial transport	-2.51396	LYStm (6.46e-03, 3.69e-02)
ppcoa	Propanoyl-CoA	Propanoyl-CoA	Valine, Leucine And Isoleucine Biosynthesis	BCAA metabolism (Val/Leu/Iso)	-0.224537	PPCOACm (6.29e-02, 7.35e-02); ACACT10m (3.73e-02, 4.10e-02); MMSAD1m (2.56e-02, 3.26e-02)
orot	Orotate	Orotate	Transport, Mitochondrial	Mitochondrial transport	0.486035	DHORD9 (3.67e-03, 2.62e-03)
lpam	lipoamide	Lipoamide	Alanine, Aspartate And Glutamate Metabolism	AA central (A/D/E,G/S/T)	-9.79716	GCC2am (4.20e-04, 3.74e-01)
b2coa	crotonoyl-CoA(4-)	SC acyl-CoA	Lysine Degradation	AA other (Cys/Met/Lys/Arg/Pro)	-2.51396	ECOAH1m (6.46e-03, 3.69e-02)
cdp	CDP	CDP	Pyrimidine Metabolism	Nucleotide metabolism	0.486035	NDPK3m (1.50e-03, 1.07e-03); CYTK1 (1.21e-03, 8.65e-04); CYTK1m (3.53e-04, 2.52e-04)
ppi	Diphosphate	PPi	Pentose And Glucuronate Interconversions	Redox & Pentose Metabolism	0.486035	GALU (1.85e-03, 1.32e-03)
nh4	Ammonium	NH4	Nucleotide Metabolism	Nucleotide metabolism	-0.143886	r0276 (1.06e+00, 1.17e+00); GMPR (1.06e+00, 1.17e+00)
glu__L	L-glutamate(1-)	L-Glu	Pyrimidine Metabolism	Nucleotide metabolism	0.486035	CTPS2 (1.29e-02, 9.24e-03)
oaa	Oxaloacetate	Oxaloacetate	Extracellular Transport	Extracellular Transport	-10.3626	OAAt_1 (3.83e-04, 5.04e-01)
3hmbcoa	(2S,3S)-3-hydroxy-2-methylbutanoyl-CoA(4-)	(2S,3S)-3-hydroxy-2-methylbutanoyl-CoA(4-)	Valine, Leucine And Isoleucine Biosynthesis	BCAA metabolism (Val/Leu/Iso)	-0.133464	HACD9m (3.73e-02, 4.10e-02); ECOAH9m (3.73e-02, 4.10e-02)
xolest2_hs	cholesterol ester	Cholesterol ester	Extracellular Transport	Extracellular Transport	0.486035	CHOLESTle (6.33e-03, 4.52e-03)
clpn_hs	cardiolipin	Cardiolipin	Biomass And Maintenance Functions	Biomass And Maintenance Functions	0.486035	BIOMASS_maintenance (2.40e-02, 1.72e-02)
10fthf	10-Formyltetrahydrofolate	10-Formyltetrahydrofolate	Purine Metabolism	Nitrogen disposal	0.486035	GARFT (4.72e-03, 3.37e-03); AICART (4.72e-03, 3.37e-03)
cytd	Cytidine	Cytidine	Nucleotide Interconversion	Nucleotide metabolism	0.486035	r0531 (1.61e-02, 1.15e-02); CYTDK1 (5.28e-03, 3.77e-03)
phpyr	keto-phenylpyruvate	Phenylpyruvate	Phenylalanine Metabolism	AAA metabolism (Trp/Phe/Tyr)	0.0761316	PHETA1m (9.96e+00, 9.45e+00); PHETA1 (9.96e+00, 9.45e+00)
h	proton	H	Transport, Mitochondrial	Mitochondrial transport	0.0931037	GLUt2m (1.01e+01, 9.19e+00); HUMANGEM_MAR05116 (9.96e+00, 9.45e+00); HUMANGEM_MAR11443 (9.96e+00, 9.45e+00); HUMANGEM_MAR08093 (3.73e-02, 4.10e-02); LYStm (6.46e-03, 3.69e-02); 3MOBt2im (2.56e-02, 3.26e-02)
3mop	3-methyl-2-oxopentanoate	3-Methyl-2-oxopentanoate	Biosynthesis Of Amino Acids	Biosynthesis Of Amino Acids	-0.133464	ILETA (3.73e-02, 4.10e-02)
atp	ATP	ATP/ADP	Transport, Mitochondrial	Mitochondrial transport	0.011554	ATPtm (1.06e+01, 1.05e+01)
tyr__L	L-tyrosine	L-tyrosine	Pseudoreactions	Pseudoreactions	0.486035	EX_tyr__L_e (1.12e-02, 7.97e-03)
glc__D	D-glucose	Glc	Starch And Sucrose Metabolism	Starch And Sucrose Metabolism	4.92367e-13	HEX1 (5.00e+00, 5.00e+00)
occoa	Octanoyl-CoA (n-C8:0CoA)	Octanoyl-CoA (n-C8:0CoA)	Fatty Acid Biosynthesis	Lipid metabolism	0.486035	FAS100COA (1.29e-02, 9.23e-03); FAS80COA__L (1.29e-02, 9.23e-03)
cgly	L-cysteinylglycine	L-cysteinylglycine	Glutathione Metabolism	Redox & Pentose Metabolism	1.1402	r0130 (2.67e-02, 0.00e+00); AMPTASECG (2.33e-02, 1.66e-02); r0129 (2.33e-02, 1.66e-02)
chol	Choline	Choline	Pseudoreactions	Pseudoreactions	0.486035	EX_chol_e (3.64e-03, 2.60e-03)
h	proton	H	Sphingolipid Metabolism	Lipid metabolism	0.486035	3DSPHR (5.14e-04, 3.67e-04); DSAT (5.14e-04, 3.67e-04); RE2675C (5.14e-04, 3.67e-04); SERPT (5.14e-04, 3.67e-04)
ppi	Diphosphate	PPi	Butanoate Metabolism	Butanoate Metabolism	-2.51396	AACOAT (6.46e-03, 3.69e-02)
gln__L	L-glutamine	L-Gln	Pyrimidine Metabolism	Nucleotide metabolism	0.486035	CTPS2 (1.29e-02, 9.24e-03)
phpyr	keto-phenylpyruvate	Phenylpyruvate	2-oxocarboxylic Acid Metabolism	2-oxocarboxylic Acid Metabolism	0.0761316	PHETA1m (9.96e+00, 9.45e+00); PHETA1 (9.96e+00, 9.45e+00)
tdcoa	Tetradecanoyl-CoA (n-C14:0CoA)	Tetradecanoyl-CoA (n-C14:0CoA)	Fatty Acid Biosynthesis	Lipid metabolism	0.486035	FAS140COA (1.29e-02, 9.23e-03); FAS160COA (1.29e-02, 9.23e-03)
pi	hydrogenphosphate	HPO4	Citric Acid Cycle	Central Energy Metabolism	0.69686	SUCOASm (1.19e+00, 8.66e-01); PCm (5.58e-01, 2.11e-01)
oaa	Oxaloacetate	Oxaloacetate	Alanine, Aspartate And Glutamate Metabolism	AA central (A/D/E,G/S/T)	0.486035	ASPTA (3.36e-02, 2.40e-02)
2mp2coa	2-Methylprop-2-enoyl-CoA	2-Methylprop-2-enoyl-CoA	Valine, Leucine And Isoleucine Biosynthesis	BCAA metabolism (Val/Leu/Iso)	-0.347877	ECOAH12m (2.56e-02, 3.26e-02); r0560 (2.56e-02, 3.26e-02)
dhdascb	dehydroascorbide(1-)	Dehydroascorbide(1-)	Vitamin C Metabolism	Vitamin C Metabolism	0.0723853	ASCBOX (3.27e-02, 3.11e-02)
ura	uracil	Uracil	Pyrimidine Catabolism	Nucleotide metabolism	0.486035	PYNP2r (1.63e-02, 1.16e-02)
nadp	Nicotinamide adenine dinucleotide phosphate	NADP(+)	Nucleotide Metabolism	Nucleotide metabolism	-0.143886	r0276 (1.06e+00, 1.17e+00); GMPR (1.06e+00, 1.17e+00)
prpp	5-Phospho-alpha-D-ribose 1-diphosphate	5-Phospho-alpha-D-ribose 1-diphosphate	Nucleotide Salvage Pathway	Nucleotide Salvage Pathway	0.486035	GUAPRT (1.75e-02, 1.25e-02)
ca2	Calcium	Calcium	Extracellular Transport	Extracellular Transport	-5.57181	CAt7r (2.54e-03, 1.21e-01); CA2t (2.54e-03, 1.21e-01)
arg__L	L-argininium(1+)	Arg	Transport, Mitochondrial	Mitochondrial transport	6	ARGtm (4.48e-02, 0.00e+00)
oaa	Oxaloacetate	Oxaloacetate	Glyoxylate And Dicarboxylate Metabolism	Glyoxylate And Dicarboxylate Metabolism	-0.0422779	CSm (8.27e-01, 8.52e-01); MDH (3.74e-02, 3.87e-02)
crn	L-Carnitine	L-Carnitine	Transport, Endoplasmic Reticulum	Transport, Endoplasmic Reticulum	6	r0998 (1.92e-04, 0.00e+00)
oaa	Oxaloacetate	Oxaloacetate	2-oxocarboxylic Acid Metabolism	2-oxocarboxylic Acid Metabolism	-0.972261	CSm (8.27e-01, 8.52e-01); ASPTAm (0.00e+00, 8.06e-01); ASPTA (3.74e-02, 3.87e-02)
adn	Adenosine	Ado	Purine Metabolism	Nitrogen disposal	0.146316	NTD7 (3.15e-04, 2.84e-04); PUNP1 (3.15e-04, 2.84e-04)
nadh	Nicotinamide adenine dinucleotide - reduced	NAD(+)	Pyruvate Metabolism	Central Energy Metabolism	-0.0459388	MDH (3.74e-02, 3.87e-02)
1pyr5c	1-Pyrroline-5-carboxylate	P5C	Alanine, Aspartate And Glutamate Metabolism	AA central (A/D/E,G/S/T)	-6	P5CDm (0.00e+00, 4.45e-02)
h2o	Water	H2O	Citric Acid Cycle	Central Energy Metabolism	-0.0429423	FUMm (1.53e+00, 1.57e+00); CSm (8.27e-01, 8.52e-01); FUM (2.98e-03, 2.69e-03)
pyr	pyruvate	Pyr	Pyruvate Metabolism	Central Energy Metabolism	-0.109209	PYK (9.88e+00, 9.96e+00); PCm (8.27e-01, 1.66e+00); ME2m (1.57e+00, 1.61e+00)
orot5p	Orotidine 5-phosphate	Orotidine 5-phosphate	Pyrimidine Metabolism	Nucleotide metabolism	0.146316	ORPT (1.37e-03, 1.24e-03); OMPDC (1.37e-03, 1.24e-03)
Lkynr	L-kynurenine	L-kynurenine	Tryptophan Metabolism	AAA metabolism (Trp/Phe/Tyr)	0.146316	FKYNH (3.53e-03, 3.19e-03); KYN3OX (3.53e-03, 3.19e-03)
h	proton	H	Lysine Degradation	AA other (Cys/Met/Lys/Arg/Pro)	-0.0219846	HACD1m (4.31e-02, 4.38e-02); r0525 (4.31e-02, 4.38e-02); SACCD3m (4.31e-02, 4.38e-02)
akg	2-Oxoglutarate	Î±-KG	Pantothenate And Coa Biosynthesis	Pantothenate And Coa Biosynthesis	-0.0307763	VALTA (4.09e-02, 4.17e-02)
coa	Coenzyme A	CoA	Tryptophan Metabolism	AAA metabolism (Trp/Phe/Tyr)	0.0280671	2OXOADOXm (4.31e-02, 4.38e-02); ACACT1r (1.93e-02, 1.75e-02)
co2	carbon dioxide	CO2	Beta-alanine Metabolism	Beta-alanine Metabolism	-6	ASP1DCm (0.00e+00, 8.06e-01); MMSAD3m (0.00e+00, 8.06e-01)
3pg	3-Phospho-D-glycerate	3-PG	Glycine, Serine And Threonine Metabolism	AA central (A/D/E,G/S/T)	-0.0124985	PGM (9.88e+00, 9.96e+00); PGCD (4.52e-03, 4.08e-03)
hco3	Bicarbonate	HCO3	Biosynthesis Of Amino Acids	Biosynthesis Of Amino Acids	-1.00287	PCm (8.27e-01, 1.66e+00)
nh4	Ammonium	NH4	Purine Metabolism	Nitrogen disposal	0.146316	r0276 (5.52e-04, 4.98e-04)
L2aadp	L-2-aminoadipate(1-)	Adipates	Lysine Metabolism	AA other (Cys/Met/Lys/Arg/Pro)	-0.0219846	r0450 (4.31e-02, 4.38e-02); r0594m (4.31e-02, 4.38e-02)
urea	Urea	Urea	Arginine And Proline Metabolism	AA other (Cys/Met/Lys/Arg/Pro)	6	ARGNm (4.48e-02, 0.00e+00)
g6p	D-Glucose 6-phosphate	D-Glucose 6-phosphate	Biomass And Maintenance Functions	Biomass And Maintenance Functions	0.146316	BIOMASS_maintenance (8.99e-03, 8.13e-03)
aacoa	Acetoacetyl-CoA	Acetoacetyl-CoA	Pyruvate Metabolism	Central Energy Metabolism	0.146316	ACACT1r (1.93e-02, 1.75e-02)
ump	UMP	UMP	Pyrimidine Synthesis	Nucleotide metabolism	0.146316	OMPDC (1.37e-03, 1.24e-03)
nad	Nicotinamide adenine dinucleotide	NAD(+)	Inositol Phosphate Metabolism	Inositol Phosphate Metabolism	-6	MMSAD3m (0.00e+00, 8.06e-01)
adp	ADP	ATP/ADP	Valine, Leucine And Isoleucine Biosynthesis	BCAA metabolism (Val/Leu/Iso)	-0.0222408	PPCOACm (8.61e-02, 8.75e-02)
malcoa	Malonyl-CoA	Malonyl-CoA	Pyruvate Metabolism	Central Energy Metabolism	0.146316	ACCOAC (3.39e-02, 3.06e-02)
lpchol_hs	lysophosphatidylcholine	Lysophosphatidylcholine	Transport, Endosomal	Transport, Endosomal	0.146316	LPCHOLt (2.37e-03, 2.14e-03)
fdp	D-Fructose 1,6-bisphosphate	F1,6BP	Glycolysis/Gluconeogenesis	Central Energy Metabolism	6	PFK (4.94e+00, 0.00e+00)
2mop	2-methyl-3-oxopropanoate	2-Methyl-3-oxopropanoate	Valine, Leucine And Isoleucine Biosynthesis	BCAA metabolism (Val/Leu/Iso)	-0.0307763	HIBDm (4.09e-02, 4.17e-02); MMSAD1m (4.09e-02, 4.17e-02)
phe__L	L-phenylalanine	L-Phe	Transport, Mitochondrial	Mitochondrial transport	0.0222934	HUMANGEM_MAR05116 (1.05e+01, 1.03e+01)
h2o	Water	H2O	Lysine Metabolism	AA other (Cys/Met/Lys/Arg/Pro)	-0.0219846	r0594m (4.31e-02, 4.38e-02); r0525 (4.31e-02, 4.38e-02); SACCD3m (4.31e-02, 4.38e-02)
3hmp	3-hydroxy-2-methylpropanoate	3-Hydroxy-2-methylpropanoate	Valine, Leucine And Isoleucine Biosynthesis	BCAA metabolism (Val/Leu/Iso)	-0.0307763	HIBDm (4.09e-02, 4.17e-02); 3HBCOAHLm (4.09e-02, 4.17e-02)
fpram	2-(Formamido)-N1-(5-phospho-D-ribosyl)acetamidine	2-(Formamido)-N1-(5-phospho-D-ribosyl)acetamidine	Purine Synthesis	Nucleotide metabolism	0.146316	r0666 (1.77e-03, 1.60e-03); PRFGS (1.77e-03, 1.60e-03)
glyb	glycine betaine	Glycine betaine	Glycine, Serine And Threonine Metabolism	AA central (A/D/E,G/S/T)	-0.5072	r0553 (9.85e+00, 1.49e+01); r0552 (9.85e+00, 1.49e+01); r0552m (2.35e+00, 2.42e+00); r0553m (2.35e+00, 2.42e+00)
crm_hs	N-acylsphingosine	N-acylsphingosine	Transport, Endoplasmic Reticulum	Transport, Endoplasmic Reticulum	6	HUMANGEM_MAR00730 (1.92e-04, 0.00e+00)
q10h2	Ubiquinol-10	Ubiquinol-10	Oxidative Phosphorylation	Oxidative Phosphorylation	-0.056802	CYOR_u10m (6.18e+00, 6.41e+00); NADH2_u10m (4.52e+00, 4.71e+00)
h	proton	H	Synthesis And Degradation Of Ketone Bodies	Lipid metabolism	-0.0219846	HMGCOASim (4.31e-02, 4.38e-02)
lys__L	L-lysinium(1+)	Lys	Biomass And Maintenance Functions	Biomass And Maintenance Functions	0.146316	BIOMASS_maintenance (8.99e-03, 8.13e-03)
malcoa	Malonyl-CoA	Malonyl-CoA	Fatty Acid Biosynthesis	Lipid metabolism	0.146316	ACCOAC (3.39e-02, 3.06e-02); FAS140COA (4.84e-03, 4.37e-03); FAS120COA (4.84e-03, 4.37e-03); FAS100COA (4.84e-03, 4.37e-03); FAS80COA__L (4.84e-03, 4.37e-03); FAS160COA (4.84e-03, 4.37e-03)
urea	Urea	Urea	Extracellular Transport	Extracellular Transport	6	UREAt (4.48e-02, 0.00e+00)
thf	5,6,7,8-Tetrahydrofolate	THF	Cyanoamino Acid Metabolism	Cyanoamino Acid Metabolism	0.146316	GHMT2rm (4.52e-03, 4.08e-03)
L2aadp	L-2-aminoadipate(1-)	Adipates	2-oxocarboxylic Acid Metabolism	2-oxocarboxylic Acid Metabolism	-0.0219846	r0450 (4.31e-02, 4.38e-02)
glu__L	L-glutamate(1-)	L-Glu	Valine, Leucine And Isoleucine Biosynthesis	BCAA metabolism (Val/Leu/Iso)	-0.0222408	ILETA (4.53e-02, 4.57e-02); VALTA (4.09e-02, 4.17e-02)
acac	acetoacetate	Acetoacetate	Cholesterol Metabolism	Lipid metabolism	-0.0219846	HMGLm (4.31e-02, 4.38e-02)
dttp	dTTP	dTTP	Biomass And Maintenance Functions	Biomass And Maintenance Functions	0.146316	BIOMASS_maintenance (8.99e-03, 8.13e-03)
didp	dIDP	DIDP	Nucleotide Metabolism	Nucleotide metabolism	0.146316	NDPK10 (3.15e-04, 2.84e-04); NDPK10n (3.15e-04, 2.84e-04)
3hbcoa	(S)-3-hydroxybutanoyl-CoA(4-)	SC acyl-CoA	Lysine Degradation	AA other (Cys/Met/Lys/Arg/Pro)	-0.0219846	HACD1m (4.31e-02, 4.38e-02); ECOAH1m (4.31e-02, 4.38e-02)
nadph	Nicotinamide adenine dinucleotide phosphate - reduced	NADP(+)	Tryptophan Metabolism	AAA metabolism (Trp/Phe/Tyr)	0.146316	KYN3OX (3.53e-03, 3.19e-03)
h2o	Water	H2O	Glyoxylate And Dicarboxylate Metabolism	Glyoxylate And Dicarboxylate Metabolism	-0.0411528	CSm (8.27e-01, 8.52e-01); GHMT2rm (4.52e-03, 4.08e-03)
h2o	Water	H2O	2-oxocarboxylic Acid Metabolism	2-oxocarboxylic Acid Metabolism	-0.042112	CSm (8.27e-01, 8.52e-01)
nadp	Nicotinamide adenine dinucleotide phosphate	NADP(+)	Purine Metabolism	Nitrogen disposal	0.146316	r0276 (5.52e-04, 4.98e-04)
nadph	Nicotinamide adenine dinucleotide phosphate - reduced	NADP(+)	Biosynthesis Of Amino Acids	Biosynthesis Of Amino Acids	-0.042112	ICDHym (8.27e-01, 8.52e-01)
mmcoa_S	(S)-methylmalonyl-CoA(5-)	(S)-methylmalonyl-CoA(5-)	Valine, Leucine And Isoleucine Degradation	BCAA metabolism (Val/Leu/Iso)	-0.0222408	MMEm (8.61e-02, 8.75e-02); PPCOACm (8.61e-02, 8.75e-02)
h	proton	H	Biomass And Maintenance Functions	Biomass And Maintenance Functions	6.76041e-05	ATPM (1.85e+01, 1.85e+01); BIOMASS_maintenance (8.99e-03, 8.13e-03)
h	proton	H	Pyrimidine Catabolism	Nucleotide metabolism	0.146316	CYTDe (4.04e-03, 3.65e-03); DCMPDA (2.27e-04, 2.05e-04)
nadp	Nicotinamide adenine dinucleotide phosphate	NADP(+)	Ascorbate And Aldarate Metabolism	Ascorbate And Aldarate Metabolism	-0.0548146	DASCBR (3.09e-02, 3.21e-02)
ppi	Diphosphate	PPi	Pyrimidine Metabolism	Nucleotide metabolism	0.146316	ORPT (1.37e-03, 1.24e-03)
saccrp__L	L-saccharopinate(1-)	L-saccharopinate(1-)	Lysine Degradation	AA other (Cys/Met/Lys/Arg/Pro)	-0.0219846	SACCD3m (4.31e-02, 4.38e-02); r0525 (4.31e-02, 4.38e-02)
hLkynr	3-hydroxy-L-kynurenine	3-Hydroxy-L-kynurenine	Tryptophan Metabolism	AAA metabolism (Trp/Phe/Tyr)	0.146316	KYN3OX (3.53e-03, 3.19e-03); 3HKYNAKGAT (3.53e-03, 3.19e-03)
atp	ATP	ATP/ADP	Biomass And Maintenance Functions	Biomass And Maintenance Functions	6.76041e-05	ATPM (1.85e+01, 1.85e+01); BIOMASS_maintenance (8.99e-03, 8.13e-03)
ala_B	beta-alanine	Beta-alanine	Propanoate Metabolism	Propanoate Metabolism	-6	APAT2rm (0.00e+00, 8.06e-01)
co2	carbon dioxide	CO2	Pyrimidine Metabolism	Nucleotide metabolism	0.146316	OMPDC (1.37e-03, 1.24e-03)
glu__L	L-glutamate(1-)	L-Glu	Taurine And Hypotaurine Metabolism	Taurine And Hypotaurine Metabolism	-0.00576092	GLUDxm (4.80e-01, 4.82e-01)
nad	Nicotinamide adenine dinucleotide	NAD(+)	Butanoate Metabolism	Butanoate Metabolism	-0.0219846	HACD1m (4.31e-02, 4.38e-02)
chol	Choline	Choline	Glycerophospholipid Metabolism	Lipid metabolism	0.220452	CHOLK (4.33e-03, 3.91e-03); GPDDA1 (2.37e-03, 2.14e-03); PSSA1_hs (7.90e-04, 5.40e-04); PSSA1r_hs (1.92e-04, 0.00e+00)
acac	acetoacetate	Acetoacetate	Fatty Acid Degradation	Lipid metabolism	-0.145756	ACACt2 (2.38e-02, 2.63e-02)
adp	ADP	ATP/ADP	Pyrimidine Metabolism	Nucleotide metabolism	0.0194059	URIDK2 (6.33e-03, 5.72e-03); CTPS2 (4.85e-03, 4.38e-03); CYTDK1 (1.98e-03, 1.79e-03); CBPS (0.00e+00, 1.24e-03); NDPK3m (5.61e-04, 5.07e-04); CYTK1 (4.54e-04, 4.10e-04); NDPK6m (3.15e-04, 2.84e-04); NDPK4n (3.15e-04, 2.84e-04); CYTK1m (1.32e-04, 1.19e-04)
accoa	Acetyl-CoA	Acetyl-CoA	Glyoxylate And Dicarboxylate Metabolism	Glyoxylate And Dicarboxylate Metabolism	-0.0380696	CSm (8.27e-01, 8.52e-01); ACACT1r (1.93e-02, 1.75e-02)
b2coa	crotonoyl-CoA(4-)	SC acyl-CoA	Fatty Acid Degradation	Lipid metabolism	-0.0219846	ECOAH1m (4.31e-02, 4.38e-02)
1pyr5c	1-Pyrroline-5-carboxylate	P5C	Biosynthesis Of Amino Acids	Biosynthesis Of Amino Acids	-6	PRO1xm (0.00e+00, 4.45e-02)
coa	Coenzyme A	CoA	Valine, Leucine And Isoleucine Biosynthesis	BCAA metabolism (Val/Leu/Iso)	-0.0238813	r0604 (4.53e-02, 4.57e-02); ACACT10m (4.53e-02, 4.57e-02); r0561 (4.09e-02, 4.17e-02); 3HBCOAHLm (4.09e-02, 4.17e-02); MMSAD1m (4.09e-02, 4.17e-02)
adp	ADP	ATP/ADP	Starch And Sucrose Metabolism	Starch And Sucrose Metabolism	9.76216	HEX1 (4.95e+00, 5.70e-03)
ddcacoa	Dodecanoyl-CoA (n-C12:0CoA)	Dodecanoyl-CoA (n-C12:0CoA)	Fatty Acid Biosynthesis	Lipid metabolism	0.146316	FAS120COA (4.84e-03, 4.37e-03); FAS140COA (4.84e-03, 4.37e-03)
coa	Coenzyme A	CoA	Terpenoid Backbone Biosynthesis	Terpenoid Backbone Biosynthesis	0.0280671	HMGCOASim (4.31e-02, 4.38e-02); ACACT1r (1.93e-02, 1.75e-02)
nadh	Nicotinamide adenine dinucleotide - reduced	NAD(+)	Sphingolipid Metabolism	Lipid metabolism	0.146316	RE2675C (1.92e-04, 1.74e-04)
o2	O2	O2	Oxidative Phosphorylation	Oxidative Phosphorylation	-0.0548146	CYOOm3 (3.09e+00, 3.21e+00)
lys__L	L-lysinium(1+)	Lys	Transport, Mitochondrial	Mitochondrial transport	-0.0219846	LYStm (4.31e-02, 4.38e-02)
ppcoa	Propanoyl-CoA	Propanoyl-CoA	Valine, Leucine And Isoleucine Biosynthesis	BCAA metabolism (Val/Leu/Iso)	-0.0222408	PPCOACm (8.61e-02, 8.75e-02); ACACT10m (4.53e-02, 4.57e-02); MMSAD1m (4.09e-02, 4.17e-02)
orot	Orotate	Orotate	Transport, Mitochondrial	Mitochondrial transport	0.146316	DHORD9 (1.37e-03, 1.24e-03)
gdp	GDP	GDP	Citric Acid Cycle	Central Energy Metabolism	-0.0437386	SUCOAS1m (1.53e+00, 1.57e+00)
b2coa	crotonoyl-CoA(4-)	SC acyl-CoA	Lysine Degradation	AA other (Cys/Met/Lys/Arg/Pro)	-0.0219846	ECOAH1m (4.31e-02, 4.38e-02)
cdp	CDP	CDP	Pyrimidine Metabolism	Nucleotide metabolism	0.146316	NDPK3m (5.61e-04, 5.07e-04); CYTK1 (4.54e-04, 4.10e-04); CYTK1m (1.32e-04, 1.19e-04)
ppi	Diphosphate	PPi	Pentose And Glucuronate Interconversions	Redox & Pentose Metabolism	0.146316	GALU (6.93e-04, 6.26e-04)
nh4	Ammonium	NH4	Nucleotide Metabolism	Nucleotide metabolism	0.146316	r0276 (5.52e-04, 4.98e-04)
glu__L	L-glutamate(1-)	L-Glu	Pyrimidine Metabolism	Nucleotide metabolism	-0.213645	CTPS2 (4.85e-03, 4.38e-03); CBPS (0.00e+00, 1.24e-03)
3hmbcoa	(2S,3S)-3-hydroxy-2-methylbutanoyl-CoA(4-)	(2S,3S)-3-hydroxy-2-methylbutanoyl-CoA(4-)	Valine, Leucine And Isoleucine Biosynthesis	BCAA metabolism (Val/Leu/Iso)	-0.014491	ECOAH9m (4.53e-02, 4.57e-02); HACD9m (4.53e-02, 4.57e-02)
xolest2_hs	cholesterol ester	Cholesterol ester	Extracellular Transport	Extracellular Transport	0.146316	CHOLESTle (2.37e-03, 2.14e-03)
clpn_hs	cardiolipin	Cardiolipin	Biomass And Maintenance Functions	Biomass And Maintenance Functions	0.146316	BIOMASS_maintenance (8.99e-03, 8.13e-03)
10fthf	10-Formyltetrahydrofolate	10-Formyltetrahydrofolate	Purine Metabolism	Nitrogen disposal	0.146316	GARFT (1.77e-03, 1.60e-03); AICART (1.77e-03, 1.60e-03)
cytd	Cytidine	Cytidine	Nucleotide Interconversion	Nucleotide metabolism	0.146316	r0531 (6.02e-03, 5.44e-03); CYTDK1 (1.98e-03, 1.79e-03)
phpyr	keto-phenylpyruvate	Phenylpyruvate	Phenylalanine Metabolism	AAA metabolism (Trp/Phe/Tyr)	0.0222934	PHETA1 (1.05e+01, 1.03e+01); PHETA1m (1.05e+01, 1.03e+01)
h	proton	H	Transport, Mitochondrial	Mitochondrial transport	0.0230598	HUMANGEM_MAR11443 (1.05e+01, 1.03e+01); HUMANGEM_MAR05116 (1.05e+01, 1.03e+01); GLUt2m (9.32e+00, 9.20e+00); HUMANGEM_MAR08093 (4.53e-02, 4.57e-02); ARGtm (4.48e-02, 0.00e+00); LYStm (4.31e-02, 4.38e-02); 3MOBt2im (4.09e-02, 4.17e-02)
3mop	3-methyl-2-oxopentanoate	3-Methyl-2-oxopentanoate	Biosynthesis Of Amino Acids	Biosynthesis Of Amino Acids	-0.014491	ILETA (4.53e-02, 4.57e-02)
ala_B	beta-alanine	Beta-alanine	Beta-alanine Metabolism	Beta-alanine Metabolism	-6	ASP1DCm (0.00e+00, 8.06e-01); APAT2rm (0.00e+00, 8.06e-01)
atp	ATP	ATP/ADP	Transport, Mitochondrial	Mitochondrial transport	0.0250967	ATPtm (9.44e+00, 9.28e+00)
tyr__L	L-tyrosine	L-tyrosine	Pseudoreactions	Pseudoreactions	0.146316	EX_tyr__L_e (4.18e-03, 3.78e-03)
glc__D	D-glucose	Glc	Starch And Sucrose Metabolism	Starch And Sucrose Metabolism	9.76216	HEX1 (4.95e+00, 5.70e-03)
orn	Ornithine	Orn	Arginine And Proline Metabolism	AA other (Cys/Met/Lys/Arg/Pro)	6	ORNTArm (4.48e-02, 0.00e+00); ARGNm (4.48e-02, 0.00e+00)
occoa	Octanoyl-CoA (n-C8:0CoA)	Octanoyl-CoA (n-C8:0CoA)	Fatty Acid Biosynthesis	Lipid metabolism	0.146316	FAS100COA (4.84e-03, 4.37e-03); FAS80COA__L (4.84e-03, 4.37e-03)
cgly	L-cysteinylglycine	L-cysteinylglycine	Glutathione Metabolism	Redox & Pentose Metabolism	0	r0130 (5.00e-02, 5.00e-02)
chol	Choline	Choline	Pseudoreactions	Pseudoreactions	0.146316	EX_chol_e (1.36e-03, 1.23e-03)
h	proton	H	Sphingolipid Metabolism	Lipid metabolism	0.146316	DSAT (1.92e-04, 1.74e-04); RE2675C (1.92e-04, 1.74e-04); SERPTr (1.92e-04, 0.00e+00); 3DSPHRr (1.92e-04, 0.00e+00); 3DSPHR (0.00e+00, 1.74e-04); SERPT (0.00e+00, 1.74e-04)
h2o	Water	H2O	Arginine And Proline Metabolism	AA other (Cys/Met/Lys/Arg/Pro)	6	r0074 (4.48e-02, 0.00e+00); ARGNm (4.48e-02, 0.00e+00)
ppi	Diphosphate	PPi	Butanoate Metabolism	Butanoate Metabolism	0.146316	AACOAT (1.93e-02, 1.75e-02)
msa	3-oxopropanoate	3-Oxopropanoate	Propanoate Metabolism	Propanoate Metabolism	-6	MMSAD3m (0.00e+00, 8.06e-01); APAT2rm (0.00e+00, 8.06e-01)
gln__L	L-glutamine	L-Gln	Pyrimidine Metabolism	Nucleotide metabolism	-0.213645	CTPS2 (4.85e-03, 4.38e-03); CBPS (0.00e+00, 1.24e-03)
phpyr	keto-phenylpyruvate	Phenylpyruvate	2-oxocarboxylic Acid Metabolism	2-oxocarboxylic Acid Metabolism	0.0222934	PHETA1 (1.05e+01, 1.03e+01); PHETA1m (1.05e+01, 1.03e+01)
tdcoa	Tetradecanoyl-CoA (n-C14:0CoA)	Tetradecanoyl-CoA (n-C14:0CoA)	Fatty Acid Biosynthesis	Lipid metabolism	0.146316	FAS140COA (4.84e-03, 4.37e-03); FAS160COA (4.84e-03, 4.37e-03)
pi	hydrogenphosphate	HPO4	Citric Acid Cycle	Central Energy Metabolism	-0.457267	PCm (8.27e-01, 1.66e+00); SUCOAS1m (1.53e+00, 1.57e+00)
oaa	Oxaloacetate	Oxaloacetate	Alanine, Aspartate And Glutamate Metabolism	AA central (A/D/E,G/S/T)	-4.49591	ASPTAm (0.00e+00, 8.06e-01); ASPTA (3.74e-02, 3.87e-02)
2mp2coa	2-Methylprop-2-enoyl-CoA	2-Methylprop-2-enoyl-CoA	Valine, Leucine And Isoleucine Biosynthesis	BCAA metabolism (Val/Leu/Iso)	-0.0307763	ECOAH12m (4.09e-02, 4.17e-02); r0560 (4.09e-02, 4.17e-02)
dhdascb	dehydroascorbide(1-)	Dehydroascorbide(1-)	Vitamin C Metabolism	Vitamin C Metabolism	-0.0548146	ASCBOX (3.09e-02, 3.21e-02)
ura	uracil	Uracil	Pyrimidine Catabolism	Nucleotide metabolism	0.146316	PYNP2r (6.11e-03, 5.52e-03)
nadp	Nicotinamide adenine dinucleotide phosphate	NADP(+)	Nucleotide Metabolism	Nucleotide metabolism	0.146316	r0276 (5.52e-04, 4.98e-04)
prpp	5-Phospho-alpha-D-ribose 1-diphosphate	5-Phospho-alpha-D-ribose 1-diphosphate	Nucleotide Salvage Pathway	Nucleotide Salvage Pathway	0.116921	GUAPRT (6.42e-03, 5.92e-03)

## Sheet: LV
metabolite_id	Metabolite	Metabolite Shortname	Metabolic Pathways	Subsystem	log2FC_fluxsum	Reactions
succoa	Succinyl-CoA	Succinyl-CoA	Valine, Leucine And Isoleucine Biosynthesis	BCAA metabolism (Val/Leu/Iso)	-0.0222408	MMMm (8.61e-02, 8.75e-02)
ditp	dITP(4-)	DITP	Nucleotide Interconversion	Nucleotide metabolism	0.146316	NDPK10 (3.15e-04, 2.84e-04); NDPK10n (3.15e-04, 2.84e-04)
datp	dATP	dATP	Biomass And Maintenance Functions	Biomass And Maintenance Functions	0.146316	BIOMASS_maintenance (8.99e-03, 8.13e-03)
nad	Nicotinamide adenine dinucleotide	NAD(+)	Citric Acid Cycle	Central Energy Metabolism	-0.0450379	AKGDm (1.44e+00, 1.49e+00); MDH (3.74e-02, 3.87e-02)
ile__L	L-isoleucine	L-isoleucine	2-oxocarboxylic Acid Metabolism	2-oxocarboxylic Acid Metabolism	-0.014491	ILETA (4.53e-02, 4.57e-02)
pi	hydrogenphosphate	HPO4	Oxidative Phosphorylation	Oxidative Phosphorylation	-0.0947628	ATPS4m (8.83e+00, 9.45e+00); PPAm (1.20e-01, 1.09e-01)
h2o	Water	H2O	Extracellular Transport	Extracellular Transport	-0.0765777	FOLt2 (1.91e+00, 2.01e+00); PCt (2.37e-03, 2.14e-03); CHOLESTle (2.37e-03, 2.14e-03); PSFLIP (4.50e-04, 4.06e-04); r1402 (2.31e-04, 2.09e-04)
cmp	CMP	CMP	Nucleotide Interconversion	Nucleotide metabolism	0.146316	r0531 (6.02e-03, 5.44e-03); CYTDK1 (1.98e-03, 1.79e-03); CYTK1 (4.54e-04, 4.10e-04); CYTK1m (1.32e-04, 1.19e-04)
imp	IMP	IMP	Purine Catabolism	Purine Catabolism	0.146316	r0276 (5.52e-04, 4.98e-04)
clpn_hs	cardiolipin	Cardiolipin	Transport, Mitochondrial	Mitochondrial transport	0.146316	HUMANGEM_MAR00587 (5.94e-05, 5.36e-05)
ditp	dITP(4-)	DITP	Purine Metabolism	Nitrogen disposal	0.146316	NDPK10 (3.15e-04, 2.84e-04); NDPK10n (3.15e-04, 2.84e-04)
pi	hydrogenphosphate	HPO4	Valine, Leucine And Isoleucine Degradation	BCAA metabolism (Val/Leu/Iso)	-0.0222408	PPCOACm (8.61e-02, 8.75e-02)
hmgcoa	Hydroxymethylglutaryl-CoA	HMG-CoA	Butanoate Metabolism	Butanoate Metabolism	-0.0219846	HMGLm (4.31e-02, 4.38e-02); HMGCOASim (4.31e-02, 4.38e-02)
2mpdhl	S-(2-Methylpropanoyl)-dihydrolipoamide	S-(2-Methylpropanoyl)-dihydrolipoamide	Valine, Leucine And Isoleucine Biosynthesis	BCAA metabolism (Val/Leu/Iso)	-0.0307763	r0561 (4.09e-02, 4.17e-02); r0385 (4.09e-02, 4.17e-02)
thf	5,6,7,8-Tetrahydrofolate	THF	Folate Metabolism	Folate Metabolism	0.146316	GHMT2rm (4.52e-03, 4.08e-03); r0295 (4.20e-03, 3.80e-03); FTHFL (3.53e-03, 3.19e-03); GARFT (1.77e-03, 1.60e-03); AICART (1.77e-03, 1.60e-03); r0226 (3.15e-04, 2.84e-04)
val__L	L-valine	L-Val	Biomass And Maintenance Functions	Biomass And Maintenance Functions	0.146316	BIOMASS_maintenance (8.99e-03, 8.13e-03)
3mop	3-methyl-2-oxopentanoate	3-Methyl-2-oxopentanoate	Transport, Mitochondrial	Mitochondrial transport	-0.014491	HUMANGEM_MAR08093 (4.53e-02, 4.57e-02)
co2	carbon dioxide	CO2	Pentose Phosphate Pathway	Redox & Pentose Metabolism	0.146316	GND (3.14e-03, 2.84e-03)
nad	Nicotinamide adenine dinucleotide	NAD(+)	Lysine Metabolism	AA other (Cys/Met/Lys/Arg/Pro)	-0.0219846	2OXOADOXm (4.31e-02, 4.38e-02); r0594m (4.31e-02, 4.38e-02); r0525 (4.31e-02, 4.38e-02)
coa	Coenzyme A	CoA	Triacylglycerol Synthesis	Lipid metabolism	0.146316	AGPAT1 (4.55e-03, 4.11e-03); GPAM_hs (4.55e-03, 4.11e-03); DGAT (9.75e-05, 8.81e-05)
sphgn	sphinganine(1+)	Sphinganine(1+)	Transport, Endoplasmic Reticulum	Transport, Endoplasmic Reticulum	6	HUMANGEM_MAR08737 (1.92e-04, 0.00e+00)
msa	3-oxopropanoate	3-Oxopropanoate	Beta-alanine Metabolism	Beta-alanine Metabolism	-6	MMSAD3m (0.00e+00, 8.06e-01); APAT2rm (0.00e+00, 8.06e-01)
nadp	Nicotinamide adenine dinucleotide phosphate	NADP(+)	Fructose And Mannose Metabolism	Fructose And Mannose Metabolism	-6	SBTR (0.00e+00, 4.98e+00)
dttp	dTTP	dTTP	Nucleotide Interconversion	Nucleotide metabolism	0.146316	NDPK4n (3.15e-04, 2.84e-04)
glyc3p	Glycerol 3-phosphate	Glycerol 3-phosphate	Glycerophospholipid Metabolism	Lipid metabolism	0.146316	GPDDA1 (2.37e-03, 2.14e-03); r0202c (2.25e-03, 2.03e-03); PGPPTm (7.28e-05, 6.58e-05)
cbp	Carbamoyl phosphate	Carbamoyl phosphate	Nitrogen Metabolism	Nitrogen disposal	6	r0034 (1.37e-03, 0.00e+00)
nad	Nicotinamide adenine dinucleotide	NAD(+)	Glyoxylate And Dicarboxylate Metabolism	Glyoxylate And Dicarboxylate Metabolism	-0.0276648	MDH (3.74e-02, 3.87e-02); r0295 (4.20e-03, 3.80e-03)
cytd	Cytidine	Cytidine	Nucleotide Metabolism	Nucleotide metabolism	0.146316	CYTDK1 (1.98e-03, 1.79e-03)
nad	Nicotinamide adenine dinucleotide	NAD(+)	2-oxocarboxylic Acid Metabolism	2-oxocarboxylic Acid Metabolism	0.566736	AKGDm (1.44e+00, 1.49e+00); PDHm (7.82e-01, 0.00e+00); 2OXOADOXm (4.31e-02, 4.38e-02)
glu5sa	L-Glutamate 5-semialdehyde	GSA	Arginine And Proline Metabolism	AA other (Cys/Met/Lys/Arg/Pro)	6	ORNTArm (4.48e-02, 0.00e+00); r0074 (4.48e-02, 0.00e+00)
akg	2-Oxoglutarate	Î±-KG	Glycine, Serine And Threonine Metabolism	AA central (A/D/E,G/S/T)	0.146316	PSERT (4.52e-03, 4.08e-03)
coa	Coenzyme A	CoA	Butanoate Metabolism	Butanoate Metabolism	0.0551651	HMGCOASim (4.31e-02, 4.38e-02); ACACT1r (1.93e-02, 1.75e-02); AACOAT (1.93e-02, 1.75e-02)
h	proton	H	Nucleotide Interconversion	Nucleotide metabolism	0.146316	DURIK1 (6.11e-03, 5.52e-03); r0531 (6.02e-03, 5.44e-03); CYTDK1 (1.98e-03, 1.79e-03); ADSS (1.21e-03, 1.10e-03); TRDR (1.08e-03, 9.79e-04); DUTPDPm (3.15e-04, 2.84e-04); DADNK (3.15e-04, 2.84e-04)
nadh	Nicotinamide adenine dinucleotide - reduced	NAD(+)	Folate Metabolism	Folate Metabolism	-0.598673	r0552 (9.85e+00, 1.49e+01); r0295 (4.20e-03, 3.80e-03)
gua	Guanine	Guanine	Purine Metabolism	Nitrogen disposal	0.116921	PUNP4 (6.42e-03, 5.80e-03); GUAPRT (6.42e-03, 5.92e-03); PUNP3 (0.00e+00, 1.19e-04)
accoa	Acetyl-CoA	Acetyl-CoA	Cholesterol Metabolism	Lipid metabolism	-0.0219846	HMGLm (4.31e-02, 4.38e-02)
L2aadp	L-2-aminoadipate(1-)	Adipates	Lysine Degradation	AA other (Cys/Met/Lys/Arg/Pro)	-0.0219846	r0450 (4.31e-02, 4.38e-02)
pa_hs	phosphatidate(2-)	PhosphatidAte(2-)	Glycerophospholipid Metabolism	Lipid metabolism	0.146316	DAGK_hs (4.24e-03, 3.83e-03); CDS (2.96e-04, 2.67e-04)
dhf	7,8-Dihydrofolate	7,8-Dihydrofolate	Nucleotide Interconversion	Nucleotide metabolism	0.146316	TMDSm (3.15e-04, 2.84e-04)
urea	Urea	Urea	Transport, Mitochondrial	Mitochondrial transport	6	HUMANGEM_MAR04951 (4.48e-02, 0.00e+00)
atp	ATP	ATP/ADP	Nucleotide Interconversion	Nucleotide metabolism	-0.0279455	NDPK1m (1.53e+00, 1.57e+00); ADK1 (1.15e-01, 1.04e-01); GK1 (6.97e-03, 6.30e-03); DGK1 (6.42e-03, 5.80e-03); URIDK2 (6.33e-03, 5.72e-03); DURIK1 (6.11e-03, 5.52e-03); CYTDK1 (1.98e-03, 1.79e-03); NDPK1 (1.54e-03, 1.39e-03); NDPK8 (6.29e-04, 5.69e-04); NDPK3m (5.61e-04, 5.07e-04); CYTK1 (4.54e-04, 4.10e-04); NDPK10 (3.15e-04, 2.84e-04); NDPK8m (3.15e-04, 2.84e-04); NDPK10n (3.15e-04, 2.84e-04); ND…
h	proton	H	Purine Metabolism	Nitrogen disposal	0.000142128	ATPM (1.85e+01, 1.85e+01); PRPPS (9.56e-03, 8.76e-03); PRFGS (1.77e-03, 1.60e-03); AIRCr (1.77e-03, 1.60e-03); PRASCS (1.77e-03, 1.60e-03); GARFT (1.77e-03, 1.60e-03); PRAGSr (1.77e-03, 1.60e-03); ADSS (1.21e-03, 1.10e-03); r0276 (5.52e-04, 4.98e-04)
mlthf	5,10-Methylenetetrahydrofolate	CH2-THF	Methane Metabolism	Methane Metabolism	0.146316	GHMT2rm (4.52e-03, 4.08e-03)
glutcoa	glutaryl-CoA(5-)	Glutaryl-CoA	Lysine Metabolism	AA other (Cys/Met/Lys/Arg/Pro)	-0.0219846	2OXOADOXm (4.31e-02, 4.38e-02)
nh4	Ammonium	NH4	Pseudoreactions	Pseudoreactions	-0.610304	EX_nh4_e (4.27e-03, 6.52e-03)
oaa	Oxaloacetate	Oxaloacetate	Biosynthesis Of Amino Acids	Biosynthesis Of Amino Acids	-0.987307	PCm (8.27e-01, 1.66e+00); CSm (8.27e-01, 8.52e-01); ASPTAm (0.00e+00, 8.06e-01); ASPTA (3.74e-02, 3.87e-02)
mmcoa_R	(R)-methylmalonyl-CoA(5-)	(R)-methylmalonyl-CoA(5-)	Glyoxylate And Dicarboxylate Metabolism	Glyoxylate And Dicarboxylate Metabolism	-0.0222408	MMEm (8.61e-02, 8.75e-02); MMMm (8.61e-02, 8.75e-02)
pi	hydrogenphosphate	HPO4	Fatty Acid Metabolism	Lipid metabolism	0.146316	ACCOAC (3.39e-02, 3.06e-02)
atp	ATP	ATP/ADP	Purine Metabolism	Nitrogen disposal	-0.00240529	ATPM (1.85e+01, 1.85e+01); NDPK1m (1.53e+00, 1.57e+00); ADK1 (1.15e-01, 1.04e-01); PRPPS (9.56e-03, 8.76e-03); GK1 (6.97e-03, 6.30e-03); PRFGS (1.77e-03, 1.60e-03); PRASCS (1.77e-03, 1.60e-03); PRAGSr (1.77e-03, 1.60e-03); NDPK1 (1.54e-03, 1.39e-03); NDPK8 (6.29e-04, 5.69e-04); NDPK10 (3.15e-04, 2.84e-04); NDPK8m (3.15e-04, 2.84e-04); NDPK10n (3.15e-04, 2.84e-04); NDPK5 (2.27e-04, 2.05e-04)
co2	carbon dioxide	CO2	Citric Acid Cycle	Central Energy Metabolism	-0.0439559	AKGDm (1.44e+00, 1.49e+00); ICDHym (8.27e-01, 8.52e-01)
h2o	Water	H2O	Lysine Degradation	AA other (Cys/Met/Lys/Arg/Pro)	-0.0219846	ECOAH1m (4.31e-02, 4.38e-02); r0525 (4.31e-02, 4.38e-02); SACCD3m (4.31e-02, 4.38e-02)
adp	ADP	ATP/ADP	Citric Acid Cycle	Central Energy Metabolism	-1.00287	PCm (8.27e-01, 1.66e+00)
ser__L	L-serine	L-ser	Glyoxylate And Dicarboxylate Metabolism	Glyoxylate And Dicarboxylate Metabolism	0.146316	GHMT2rm (4.52e-03, 4.08e-03)
accoa	Acetyl-CoA	Acetyl-CoA	Fatty Acid Degradation	Lipid metabolism	0.146316	ACCOAC (3.39e-02, 3.06e-02); ACACT1r (1.93e-02, 1.75e-02)
gar	N1-(5-Phospho-D-ribosyl)glycinamide	N1-(5-Phospho-D-ribosyl)glycinamide	Purine Metabolism	Nitrogen disposal	0.146316	PRAGSr (1.77e-03, 1.60e-03); GARFT (1.77e-03, 1.60e-03)
pgp_hs	phosphatidyl glycerol phosphate	Phosphatidyl glycerol phosphate	Transport, Mitochondrial	Mitochondrial transport	0.146316	HUMANGEM_MAR11363 (7.28e-05, 6.58e-05)
tag_hs	triglyceride	Triglyceride	Triacylglycerol Synthesis	Lipid metabolism	0.146316	DGAT (9.75e-05, 8.81e-05)
HC01376	S-(2-Methylbutanoyl)-dihydrolipoamide	S-(2-Methylbutanoyl)-dihydrolipoamide	Valine, Leucine And Isoleucine Biosynthesis	BCAA metabolism (Val/Leu/Iso)	-0.014491	r0604 (4.53e-02, 4.57e-02); r0670 (4.53e-02, 4.57e-02)
fum	Fumarate	Fumarate	Purine Synthesis	Nucleotide metabolism	0.146316	ADSL2 (1.77e-03, 1.60e-03)
co2	carbon dioxide	CO2	Lysine Metabolism	AA other (Cys/Met/Lys/Arg/Pro)	-0.0219846	2OXOADOXm (4.31e-02, 4.38e-02)
lpam	lipoamide	Lipoamide	Valine, Leucine And Isoleucine Biosynthesis	BCAA metabolism (Val/Leu/Iso)	-0.0222408	r0670 (4.53e-02, 4.57e-02); r0385 (4.09e-02, 4.17e-02)
aicar	5-Amino-1-(5-Phospho-D-ribosyl)imidazole-4-carboxamide	5-Amino-1-(5-Phospho-D-ribosyl)imidAzole-4-carboxamide	Purine Synthesis	Nucleotide metabolism	0.146316	AICART (1.77e-03, 1.60e-03); ADSL2 (1.77e-03, 1.60e-03)
accoa	Acetyl-CoA	Acetyl-CoA	Lysine Degradation	AA other (Cys/Met/Lys/Arg/Pro)	0.146316	ACACT1r (1.93e-02, 1.75e-02)
glutcoa	glutaryl-CoA(5-)	Glutaryl-CoA	2-oxocarboxylic Acid Metabolism	2-oxocarboxylic Acid Metabolism	-0.0219846	2OXOADOXm (4.31e-02, 4.38e-02)
co2	carbon dioxide	CO2	Valine, Leucine And Isoleucine Degradation	BCAA metabolism (Val/Leu/Iso)	-0.0307763	MMSAD1m (4.09e-02, 4.17e-02)
ditp	dITP(4-)	DITP	Nucleotide Metabolism	Nucleotide metabolism	0.146316	NDPK10 (3.15e-04, 2.84e-04); NDPK10n (3.15e-04, 2.84e-04)
h2o	Water	H2O	Synthesis And Degradation Of Ketone Bodies	Lipid metabolism	-0.0219846	HMGCOASim (4.31e-02, 4.38e-02)
cmp	CMP	CMP	Nucleotide Metabolism	Nucleotide metabolism	0.146316	CYTDK1 (1.98e-03, 1.79e-03); CYTK1 (4.54e-04, 4.10e-04); CYTK1m (1.32e-04, 1.19e-04)
glx	glyoxylate	Glyoxylate	Glyoxylate And Dicarboxylate Metabolism	Glyoxylate And Dicarboxylate Metabolism	-0.0128324	GLYCTO1p (9.75e+00, 9.84e+00); GLYCLTDy (9.75e+00, 9.84e+00)
glyald	D-Glyceraldehyde	D-Glyceraldehyde	Fructose And Mannose Metabolism	Fructose And Mannose Metabolism	-6	FBA2 (0.00e+00, 4.98e+00); TRIOK (0.00e+00, 4.98e+00)
6pgc	6-Phospho-D-gluconate	6-Phospho-D-gluconate	Transport, Endoplasmic Reticulum	Transport, Endoplasmic Reticulum	6	HUMANGEM_MAR03953 (1.92e-04, 0.00e+00)
pi	hydrogenphosphate	HPO4	Arginine Biosynthesis	AA other (Cys/Met/Lys/Arg/Pro)	0.146316	r0034 (1.37e-03, 0.00e+00); CBPS (0.00e+00, 1.24e-03)
ile__L	L-isoleucine	L-isoleucine	Extracellular Transport	Extracellular Transport	0.000320692	ILEtec (5.00e-02, 5.00e-02); r1402 (2.31e-04, 2.09e-04)
ficytC	Ferricytochrome c	Ferricytochrome c	Oxidative Phosphorylation	Oxidative Phosphorylation	-0.0548146	CYOR_u10m (6.18e+00, 6.41e+00); CYOOm3 (3.09e+00, 3.21e+00)
asp__L	L-aspartate(1-)	L-aspartate(1-)	2-oxocarboxylic Acid Metabolism	2-oxocarboxylic Acid Metabolism	-4.49591	ASPTAm (0.00e+00, 8.06e-01); ASPTA (3.74e-02, 3.87e-02)
2mop	2-methyl-3-oxopropanoate	2-Methyl-3-oxopropanoate	Valine, Leucine And Isoleucine Degradation	BCAA metabolism (Val/Leu/Iso)	-0.0307763	MMSAD1m (4.09e-02, 4.17e-02)
nh4	Ammonium	NH4	Glycine, Serine And Threonine Metabolism	AA central (A/D/E,G/S/T)	-0.619675	r0295 (4.20e-03, 3.80e-03); THRD__L (0.00e+00, 2.66e-03)
g6p	D-Glucose 6-phosphate	D-Glucose 6-phosphate	Glycolysis/Gluconeogenesis	Central Energy Metabolism	10.6109	HEX1 (4.95e+00, 5.70e-03); PGI (4.94e+00, 0.00e+00); PGMT (6.93e-04, 6.26e-04)
pchol_hs	Phosphatidylcholine	Phosphatidylcholine	Sphingolipid Metabolism	Lipid metabolism	0.146316	SMSr (1.92e-04, 0.00e+00); SMS (0.00e+00, 1.74e-04)
ru5p__D	D-ribulose 5-phosphate(2-)	D-ribulose 5-phosphate(2-)	Biosynthesis Of Amino Acids	Biosynthesis Of Amino Acids	0.146316	RPI (3.14e-03, 2.84e-03)
accoa	Acetyl-CoA	Acetyl-CoA	Propanoate Metabolism	Propanoate Metabolism	-4.62704	MMSAD3m (0.00e+00, 8.06e-01); ACCOAC (3.39e-02, 3.06e-02)
nadh	Nicotinamide adenine dinucleotide - reduced	NAD(+)	Glycolysis/Gluconeogenesis	Central Energy Metabolism	0.0963887	GAPD (9.88e+00, 9.97e+00); PDHm (7.82e-01, 0.00e+00); GCC2cm (8.61e-02, 8.75e-02)
r1p	alpha-D-Ribose 1-phosphate	Alpha-D-Ribose 1-phosphate	Pyrimidine Metabolism	Nucleotide metabolism	0.146316	PYNP2r (6.11e-03, 5.52e-03)
co2	carbon dioxide	CO2	2-oxocarboxylic Acid Metabolism	2-oxocarboxylic Acid Metabolism	0.377102	AKGDm (1.44e+00, 1.49e+00); ICDHym (8.27e-01, 8.52e-01); PDHm (7.82e-01, 0.00e+00); 2OXOADOXm (4.31e-02, 4.38e-02)
glu__L	L-glutamate(1-)	L-Glu	Lysine Metabolism	AA other (Cys/Met/Lys/Arg/Pro)	-0.0219846	r0450 (4.31e-02, 4.38e-02); r0525 (4.31e-02, 4.38e-02)
glc__D	D-glucose	Glc	Fructose And Mannose Metabolism	Fructose And Mannose Metabolism	-6	SBTR (0.00e+00, 4.98e+00)
adp	ADP	ATP/ADP	Glyoxylate And Dicarboxylate Metabolism	Glyoxylate And Dicarboxylate Metabolism	-0.0222408	PPCOACm (8.61e-02, 8.75e-02)
pyr	pyruvate	Pyr	Glycolysis/Gluconeogenesis	Central Energy Metabolism	0.0973673	PYK (9.88e+00, 9.96e+00); PDHm (7.82e-01, 0.00e+00)
dudp	dUDP	dUDP	Nucleotide Interconversion	Nucleotide metabolism	0.146316	URIDK2 (6.33e-03, 5.72e-03); r0531 (6.02e-03, 5.44e-03); NDPK6m (3.15e-04, 2.84e-04)
h2o	Water	H2O	Biomass And Maintenance Functions	Biomass And Maintenance Functions	6.76041e-05	ATPM (1.85e+01, 1.85e+01); BIOMASS_maintenance (8.99e-03, 8.13e-03)
h2o	Water	H2O	Pyrimidine Catabolism	Nucleotide metabolism	0.146316	CYTDe (4.04e-03, 3.65e-03); NTD2 (2.07e-03, 1.87e-03); DCMPDA (2.27e-04, 2.05e-04)
nad	Nicotinamide adenine dinucleotide	NAD(+)	Arginine And Proline Metabolism	AA other (Cys/Met/Lys/Arg/Pro)	0.00863098	r0074 (4.48e-02, 0.00e+00); PRO1xm (0.00e+00, 4.45e-02)
phpyr	keto-phenylpyruvate	Phenylpyruvate	Phenylalanine, Tyrosine And Tryptophan Biosynthesis	AAA metabolism (Trp/Phe/Tyr)	0.0222934	PHETA1 (1.05e+01, 1.03e+01); PHETA1m (1.05e+01, 1.03e+01)
accoa	Acetyl-CoA	Acetyl-CoA	Pyruvate Metabolism	Central Energy Metabolism	0.146316	ACCOAC (3.39e-02, 3.06e-02); ACACT1r (1.93e-02, 1.75e-02)
betald	betaine aldehyde	Betaine aldehyde	Alanine, Aspartate And Glutamate Metabolism	AA central (A/D/E,G/S/T)	-0.5072	r0553 (9.85e+00, 1.49e+01); r0552 (9.85e+00, 1.49e+01); r0552m (2.35e+00, 2.42e+00); r0553m (2.35e+00, 2.42e+00)
hco3	Bicarbonate	HCO3	Pyrimidine Synthesis	Nucleotide metabolism	-6	CBPS (0.00e+00, 1.24e-03)
chol	Choline	Choline	Transport, Endoplasmic Reticulum	Transport, Endoplasmic Reticulum	6	HUMANGEM_MAR08526 (1.92e-04, 0.00e+00)
q10h2	Ubiquinol-10	Ubiquinol-10	Tryptophan Metabolism	AAA metabolism (Trp/Phe/Tyr)	-0.0219846	r0541 (4.31e-02, 4.38e-02)
pep	Phosphoenolpyruvate	Phosphoenolpyruvate	Biosynthesis Of Amino Acids	Biosynthesis Of Amino Acids	-0.0125673	PYK (9.88e+00, 9.96e+00); ENO (9.88e+00, 9.96e+00)
Rtotal	R total	R total	Extracellular Transport	Extracellular Transport	0.146316	RTOTALt (2.37e-03, 2.14e-03); CHOLESTle (2.37e-03, 2.14e-03)
ura	uracil	Uracil	Nucleotide Interconversion	Nucleotide metabolism	0.146316	DURIPP (6.11e-03, 5.52e-03)
pi	hydrogenphosphate	HPO4	Extracellular Transport	Extracellular Transport	0.146316	PIt9 (1.42e-02, 1.28e-02); PCt (2.37e-03, 2.14e-03); PSFLIP (4.50e-04, 4.06e-04); r1402 (2.31e-04, 2.09e-04)
dttp	dTTP	dTTP	Nucleotide Metabolism	Nucleotide metabolism	0.146316	NDPK4n (3.15e-04, 2.84e-04)
met__L	L-methionine	L-Met	Extracellular Transport	Extracellular Transport	0.146316	METt4 (2.83e-03, 2.55e-03); r1402 (2.31e-04, 2.09e-04)
coa	Coenzyme A	CoA	Citric Acid Cycle	Central Energy Metabolism	-0.0438685	SUCOAS1m (1.53e+00, 1.57e+00); AKGDm (1.44e+00, 1.49e+00); CSm (8.27e-01, 8.52e-01)
ctp	CTP	CTP	Pyrimidine Metabolism	Nucleotide metabolism	0.146316	CTPS2 (4.85e-03, 4.38e-03); NDPK3m (5.61e-04, 5.07e-04)
r5p	alpha-D-Ribose 5-phosphate	Alpha-D-Ribose 5-phosphate	Biosynthesis Of Amino Acids	Biosynthesis Of Amino Acids	0.131377	PRPPS (9.56e-03, 8.76e-03); RPI (3.14e-03, 2.84e-03)
akg	2-Oxoglutarate	Î±-KG	Lysine Degradation	AA other (Cys/Met/Lys/Arg/Pro)	-0.0219846	r0450 (4.31e-02, 4.38e-02); SACCD3m (4.31e-02, 4.38e-02)
asn__L	L-asparagine	L-asparagine	Extracellular Transport	Extracellular Transport	0.146316	ASNtN1 (4.48e-03, 4.05e-03); r1402 (2.31e-04, 2.09e-04)
datp	dATP	dATP	Nucleotide Interconversion	Nucleotide metabolism	0.146316	NDPK8 (6.29e-04, 5.69e-04); NDPK8m (3.15e-04, 2.84e-04); ADKd (3.15e-04, 2.84e-04)
accoa	Acetyl-CoA	Acetyl-CoA	Fatty Acid Biosynthesis	Lipid metabolism	0.146316	ACCOAC (3.39e-02, 3.06e-02); FAS80COA__L (4.84e-03, 4.37e-03)
glygn2	glycogen, structure 2 (glycogenin-1,6-{7[1,4-Glc], 4[1,4-Glc]})	Glycogen, structure 2 (glycogenin-1,6-{7[1,4-Glc], 4[1,4-Glc]})	Starch And Sucrose Metabolism	Starch And Sucrose Metabolism	0.146316	GLBRAN (2.31e-04, 2.09e-04)
arg__L	L-argininium(1+)	Arg	Pseudoreactions	Pseudoreactions	3.39804	EX_arg__L_e (5.00e-02, 4.74e-03)
h	proton	H	Nucleotide Metabolism	Nucleotide metabolism	6.45782e-05	ATPM (1.85e+01, 1.85e+01); CTPS2 (4.85e-03, 4.38e-03); CYTDK1 (1.98e-03, 1.79e-03); ADSS (1.21e-03, 1.10e-03); r0276 (5.52e-04, 4.98e-04)
glu__L	L-glutamate(1-)	L-Glu	2-oxocarboxylic Acid Metabolism	2-oxocarboxylic Acid Metabolism	-0.0299457	PHETA1m (1.05e+01, 1.03e+01); PHETA1 (1.05e+01, 1.03e+01); ALATA__L (1.35e+00, 1.33e+00); ASPTAm (0.00e+00, 8.06e-01); ILETA (4.53e-02, 4.57e-02); r0450 (4.31e-02, 4.38e-02); VALTA (4.09e-02, 4.17e-02); ASPTA (3.74e-02, 3.87e-02)
nadp	Nicotinamide adenine dinucleotide phosphate	NADP(+)	Glycine, Serine And Threonine Metabolism	AA central (A/D/E,G/S/T)	-0.5072	r0553 (9.85e+00, 1.49e+01); r0553m (2.35e+00, 2.42e+00)
ser__L	L-serine	L-ser	Glycine, Serine And Threonine Metabolism	AA central (A/D/E,G/S/T)	0.146316	PSP__Lm (4.52e-03, 4.08e-03); GHMT2rm (4.52e-03, 4.08e-03)
datp	dATP	dATP	Purine Metabolism	Nitrogen disposal	0.146316	NDPK8 (6.29e-04, 5.69e-04); NDPK8m (3.15e-04, 2.84e-04)
atp	ATP	ATP/ADP	Nucleotide Metabolism	Nucleotide metabolism	-0.00236302	ATPM (1.85e+01, 1.85e+01); NDPK1m (1.53e+00, 1.57e+00); ADK1 (1.15e-01, 1.04e-01); GK1 (6.97e-03, 6.30e-03); URIDK2 (6.33e-03, 5.72e-03); CTPS2 (4.85e-03, 4.38e-03); R_group_phosphotase_1 (4.74e-03, 4.28e-03); CYTDK1 (1.98e-03, 1.79e-03); NDPK1 (1.54e-03, 1.39e-03); NDPK8 (6.29e-04, 5.69e-04); NDPK3m (5.61e-04, 5.07e-04); CYTK1 (4.54e-04, 4.10e-04); NDPK10 (3.15e-04, 2.84e-04); NDPK8m (3.15e-04, …
orot	Orotate	Orotate	Pyrimidine Synthesis	Nucleotide metabolism	0.146316	ORPT (1.37e-03, 1.24e-03)
h	proton	H	Glycolysis/Gluconeogenesis	Central Energy Metabolism	0.570413	GAPD (9.88e+00, 9.97e+00); PYK (9.88e+00, 9.96e+00); HEX1 (4.95e+00, 5.70e-03); PFK (4.94e+00, 0.00e+00); GCC2cm (8.61e-02, 8.75e-02)
coa	Coenzyme A	CoA	Lysine Metabolism	AA other (Cys/Met/Lys/Arg/Pro)	-0.0219846	2OXOADOXm (4.31e-02, 4.38e-02)
glx	glyoxylate	Glyoxylate	Transport, Peroxisomal	Transport, Peroxisomal	-0.0128324	HUMANGEM_MAR07707 (9.75e+00, 9.84e+00)
o2s	superoxide	Superoxide	Transport, Mitochondrial	Mitochondrial transport	-0.0548146	O2Stm (6.18e-02, 6.41e-02)
cmp	CMP	CMP	Glycerophospholipid Metabolism	Lipid metabolism	0.146316	CEPTC (4.33e-03, 3.91e-03); CDIPTr (1.64e-04, 1.48e-04); PGPPTm (7.28e-05, 6.58e-05); CLSm_hs (5.94e-05, 5.36e-05)
atp	ATP	ATP/ADP	Glycolysis/Gluconeogenesis	Central Energy Metabolism	0.572544	PGK (9.88e+00, 9.97e+00); PYK (9.88e+00, 9.96e+00); HEX1 (4.95e+00, 5.70e-03); PFK (4.94e+00, 0.00e+00)
gmp	GMP	GMP	Nucleotide Salvage Pathway	Nucleotide Salvage Pathway	0.116921	GUAPRT (6.42e-03, 5.92e-03)
Rtotal2coa	R total 2 coenzyme A	R total 2 coenzyme A	Triacylglycerol Synthesis	Lipid metabolism	0.146316	AGPAT1 (4.55e-03, 4.11e-03)
nh4	Ammonium	NH4	Purine Catabolism	Purine Catabolism	0.146316	r0276 (5.52e-04, 4.98e-04)
akg	2-Oxoglutarate	Î±-KG	Propanoate Metabolism	Propanoate Metabolism	-6	APAT2rm (0.00e+00, 8.06e-01)
nadh	Nicotinamide adenine dinucleotide - reduced	NAD(+)	Glycerophospholipid Metabolism	Lipid metabolism	0.146316	r0202c (2.25e-03, 2.03e-03)
ascb__L	L-ascorbate	L-ascorbate	Ascorbate And Aldarate Metabolism	Ascorbate And Aldarate Metabolism	-0.0548146	DASCBR (3.09e-02, 3.21e-02)
pi	hydrogenphosphate	HPO4	Alanine, Aspartate And Glutamate Metabolism	AA central (A/D/E,G/S/T)	0.146316	PSP__Lm (4.52e-03, 4.08e-03); ASPCTr (1.37e-03, 1.24e-03); r0034 (1.37e-03, 0.00e+00); CBPS (0.00e+00, 1.24e-03); ADSS (1.21e-03, 1.10e-03)
dtdp	dTDP	dTDP	Pyrimidine Metabolism	Nucleotide metabolism	0.146316	NDPK4n (3.15e-04, 2.84e-04)
h2o	Water	H2O	Transport, Mitochondrial	Mitochondrial transport	0.00503161	H2Otm (1.11e+01, 1.11e+01)
h	proton	H	Pyrimidine Synthesis	Nucleotide metabolism	-0.0592892	CTPS2 (4.85e-03, 4.38e-03); ASPCTr (1.37e-03, 1.24e-03); OMPDC (1.37e-03, 1.24e-03); DHORTS (1.37e-03, 1.24e-03); CBPS (0.00e+00, 1.24e-03)
gdp	GDP	GDP	Propanoate Metabolism	Propanoate Metabolism	-0.0437386	SUCOAS1m (1.53e+00, 1.57e+00)
nadph	Nicotinamide adenine dinucleotide phosphate - reduced	NADP(+)	Citric Acid Cycle	Central Energy Metabolism	-0.042112	ICDHym (8.27e-01, 8.52e-01)
hco3	Bicarbonate	HCO3	Glyoxylate And Dicarboxylate Metabolism	Glyoxylate And Dicarboxylate Metabolism	-0.0222408	PPCOACm (8.61e-02, 8.75e-02)
phe__L	L-phenylalanine	L-Phe	Pseudoreactions	Pseudoreactions	0.146316	EX_phe__L_e (6.13e-03, 5.53e-03)
o2	O2	O2	Tryptophan Metabolism	AAA metabolism (Trp/Phe/Tyr)	0.146316	KYN3OX (3.53e-03, 3.19e-03); TRPO2 (3.53e-03, 3.19e-03)
coa	Coenzyme A	CoA	Glyoxylate And Dicarboxylate Metabolism	Glyoxylate And Dicarboxylate Metabolism	-0.0380696	CSm (8.27e-01, 8.52e-01); ACACT1r (1.93e-02, 1.75e-02)
atp	ATP	ATP/ADP	Pyrimidine Synthesis	Nucleotide metabolism	-0.213645	CTPS2 (4.85e-03, 4.38e-03); CBPS (0.00e+00, 1.24e-03)
2pg	D-Glycerate 2-phosphate	D-Glycerate 2-phosphate	Glycine, Serine And Threonine Metabolism	AA central (A/D/E,G/S/T)	-0.0125673	PGM (9.88e+00, 9.96e+00)
h2o	Water	H2O	Cyanoamino Acid Metabolism	Cyanoamino Acid Metabolism	0.146316	GHMT2rm (4.52e-03, 4.08e-03)
coa	Coenzyme A	CoA	2-oxocarboxylic Acid Metabolism	2-oxocarboxylic Acid Metabolism	0.377102	AKGDm (1.44e+00, 1.49e+00); CSm (8.27e-01, 8.52e-01); PDHm (7.82e-01, 0.00e+00); 2OXOADOXm (4.31e-02, 4.38e-02)
dhlam	dihydrolipoamide	Dihydrolipoamide	Valine, Leucine And Isoleucine Biosynthesis	BCAA metabolism (Val/Leu/Iso)	-0.0222408	r0604 (4.53e-02, 4.57e-02); r0561 (4.09e-02, 4.17e-02)
co2	carbon dioxide	CO2	Arginine Biosynthesis	AA other (Cys/Met/Lys/Arg/Pro)	6	r0034 (1.37e-03, 0.00e+00)
q10h2	Ubiquinol-10	Ubiquinol-10	Transport, Mitochondrial	Mitochondrial transport	0.146316	DHORD9 (1.37e-03, 1.24e-03)
3mob	3-methyl-2-oxobutanoate	Î±-Ketoisovalerate	Valine, Leucine And Isoleucine Degradation	BCAA metabolism (Val/Leu/Iso)	-0.0307763	VALTA (4.09e-02, 4.17e-02)
ru5p__D	D-ribulose 5-phosphate(2-)	D-ribulose 5-phosphate(2-)	Glutathione Metabolism	Redox & Pentose Metabolism	0.146316	GND (3.14e-03, 2.84e-03)
prpp	5-Phospho-alpha-D-ribose 1-diphosphate	5-Phospho-alpha-D-ribose 1-diphosphate	Purine Metabolism	Nitrogen disposal	0.124984	PRPPS (9.56e-03, 8.76e-03); GUAPRT (6.42e-03, 5.92e-03); GLUPRT (1.77e-03, 1.60e-03)
his__L	L-histidine	L-histidine	Biomass And Maintenance Functions	Biomass And Maintenance Functions	0.146316	BIOMASS_maintenance (8.99e-03, 8.13e-03)
h	proton	H	Fructose And Mannose Metabolism	Fructose And Mannose Metabolism	-6	TRIOK (0.00e+00, 4.98e+00); KHK (0.00e+00, 4.98e+00); SBTR (0.00e+00, 4.98e+00); SBTD__D2 (0.00e+00, 4.98e+00)
ppcoa	Propanoyl-CoA	Propanoyl-CoA	Glyoxylate And Dicarboxylate Metabolism	Glyoxylate And Dicarboxylate Metabolism	-0.0222408	PPCOACm (8.61e-02, 8.75e-02)
atp	ATP	ATP/ADP	Fructose And Mannose Metabolism	Fructose And Mannose Metabolism	-6	TRIOK (0.00e+00, 4.98e+00); KHK (0.00e+00, 4.98e+00)
for	Formate	Formate	Tryptophan Metabolism	AAA metabolism (Trp/Phe/Tyr)	0.146316	FKYNH (3.53e-03, 3.19e-03)
nadph	Nicotinamide adenine dinucleotide phosphate - reduced	NADP(+)	Lysine Metabolism	AA other (Cys/Met/Lys/Arg/Pro)	-0.0219846	SACCD3m (4.31e-02, 4.38e-02)
h2o	Water	H2O	Glutathione Metabolism	Redox & Pentose Metabolism	0	r0130 (5.00e-02, 5.00e-02)
succoa	Succinyl-CoA	Succinyl-CoA	Citric Acid Cycle	Central Energy Metabolism	-0.0443581	SUCOAS1m (1.53e+00, 1.57e+00); AKGDm (1.44e+00, 1.49e+00)
pi	hydrogenphosphate	HPO4	Purine Synthesis	Nucleotide metabolism	0.146316	r0666 (1.77e-03, 1.60e-03); PRFGS (1.77e-03, 1.60e-03); PRASCS (1.77e-03, 1.60e-03); PRAGSr (1.77e-03, 1.60e-03)
q10h2	Ubiquinol-10	Ubiquinol-10	Valine, Leucine And Isoleucine Biosynthesis	BCAA metabolism (Val/Leu/Iso)	-0.0222408	r0603 (4.53e-02, 4.57e-02); r0560 (4.09e-02, 4.17e-02)
phpyr	keto-phenylpyruvate	Phenylpyruvate	Biosynthesis Of Amino Acids	Biosynthesis Of Amino Acids	0.0222934	PHETA1 (1.05e+01, 1.03e+01); PHETA1m (1.05e+01, 1.03e+01)
gsn	Guanosine	Guanosine	Transport, Mitochondrial	Mitochondrial transport	-6	HUMANGEM_MAR05036 (0.00e+00, 1.19e-04)
3hibutcoa	(S)-3-Hydroxyisobutyryl-CoA	(S)-3-Hydroxyisobutyryl-CoA	Valine, Leucine And Isoleucine Biosynthesis	BCAA metabolism (Val/Leu/Iso)	-0.0307763	ECOAH12m (4.09e-02, 4.17e-02); 3HBCOAHLm (4.09e-02, 4.17e-02)
dutp	dUTP	DUTP	Pyrimidine Metabolism	Nucleotide metabolism	0.146316	NDPK6m (3.15e-04, 2.84e-04)
h	proton	H	Glycerophospholipid Metabolism	Lipid metabolism	0.146316	CHLPCTD (4.33e-03, 3.91e-03); CEPTC (4.33e-03, 3.91e-03); CHOLK (4.33e-03, 3.91e-03); DAGK_hs (4.24e-03, 3.83e-03); LPASE (2.37e-03, 2.14e-03); GPDDA1 (2.37e-03, 2.14e-03); r0202c (2.25e-03, 2.03e-03); PSDm_hs (4.50e-04, 4.06e-04); CDS (2.96e-04, 2.67e-04); CDIPTr (1.64e-04, 1.48e-04); PGPPTm (7.28e-05, 6.58e-05); CLSm_hs (5.94e-05, 5.36e-05)
glyb	glycine betaine	Glycine betaine	Folate Metabolism	Folate Metabolism	-0.598922	r0553 (9.85e+00, 1.49e+01); r0552 (9.85e+00, 1.49e+01)
cit	Citrate	Citrate	Biosynthesis Of Amino Acids	Biosynthesis Of Amino Acids	-0.042112	ACONTm (8.27e-01, 8.52e-01); CSm (8.27e-01, 8.52e-01)
nadp	Nicotinamide adenine dinucleotide phosphate	NADP(+)	Purine Catabolism	Purine Catabolism	0.146316	r0276 (5.52e-04, 4.98e-04)
ppi	Diphosphate	PPi	Extracellular Transport	Extracellular Transport	0.146316	r1402 (2.31e-04, 2.09e-04)
focytC	Ferrocytochrome C	Ferrocytochrome C	Oxidative Phosphorylation	Oxidative Phosphorylation	-0.0548146	CYOR_u10m (6.18e+00, 6.41e+00); CYOOm3 (3.09e+00, 3.21e+00)
g1p	D-Glucose 1-phosphate	D-Glucose 1-phosphate	Glycolysis/Gluconeogenesis	Central Energy Metabolism	0.146316	PGMT (6.93e-04, 6.26e-04)
atp	ATP	ATP/ADP	Glycerophospholipid Metabolism	Lipid metabolism	0.146316	CHOLK (4.33e-03, 3.91e-03); DAGK_hs (4.24e-03, 3.83e-03)
dudp	dUDP	dUDP	Nucleotide Metabolism	Nucleotide metabolism	0.146316	URIDK2 (6.33e-03, 5.72e-03); NDPK6m (3.15e-04, 2.84e-04)
mmcoa_S	(S)-methylmalonyl-CoA(5-)	(S)-methylmalonyl-CoA(5-)	Valine, Leucine And Isoleucine Biosynthesis	BCAA metabolism (Val/Leu/Iso)	-0.0222408	MMEm (8.61e-02, 8.75e-02); PPCOACm (8.61e-02, 8.75e-02)
nad	Nicotinamide adenine dinucleotide	NAD(+)	Lysine Degradation	AA other (Cys/Met/Lys/Arg/Pro)	-0.0219846	HACD1m (4.31e-02, 4.38e-02); r0525 (4.31e-02, 4.38e-02)
val__L	L-valine	L-Val	Pantothenate And Coa Biosynthesis	Pantothenate And Coa Biosynthesis	-0.0307763	VALTA (4.09e-02, 4.17e-02)
co2	carbon dioxide	CO2	Extracellular Transport	Extracellular Transport	-0.0435736	CO2t (3.91e+00, 4.03e+00)
g3p	Glyceraldehyde 3-phosphate	G3P	Pentose Phosphate Pathway	Redox & Pentose Metabolism	6	FBA (4.94e+00, 0.00e+00)
ile__L	L-isoleucine	L-isoleucine	Biomass And Maintenance Functions	Biomass And Maintenance Functions	0.146316	BIOMASS_maintenance (8.99e-03, 8.13e-03)
glu__L	L-glutamate(1-)	L-Glu	Arginine And Proline Metabolism	AA other (Cys/Met/Lys/Arg/Pro)	6	ORNTArm (4.48e-02, 0.00e+00); r0074 (4.48e-02, 0.00e+00)
adp	ADP	ATP/ADP	Extracellular Transport	Extracellular Transport	0.146316	PCt (2.37e-03, 2.14e-03); PSFLIP (4.50e-04, 4.06e-04); r1402 (2.31e-04, 2.09e-04)
amp	AMP	AMP	Nucleotide Interconversion	Nucleotide metabolism	0.144686	ADK1 (1.15e-01, 1.04e-01); ADSL1 (1.21e-03, 1.10e-03); NTD7 (3.15e-04, 2.84e-04)
nadph	Nicotinamide adenine dinucleotide phosphate - reduced	NADP(+)	Glyoxylate And Dicarboxylate Metabolism	Glyoxylate And Dicarboxylate Metabolism	-0.0128324	GLYCLTDy (9.75e+00, 9.84e+00)
nadph	Nicotinamide adenine dinucleotide phosphate - reduced	NADP(+)	2-oxocarboxylic Acid Metabolism	2-oxocarboxylic Acid Metabolism	-0.042112	ICDHym (8.27e-01, 8.52e-01)
ura	uracil	Uracil	Nucleotide Metabolism	Nucleotide metabolism	0.146316	PYNP2r (6.11e-03, 5.52e-03)
dcacoa	Decanoyl-CoA (n-C10:0CoA)	Decanoyl-CoA (n-C10:0CoA)	Fatty Acid Biosynthesis	Lipid metabolism	0.146316	FAS120COA (4.84e-03, 4.37e-03); FAS100COA (4.84e-03, 4.37e-03)
pyr	pyruvate	Pyr	Pseudoreactions	Pseudoreactions	-0.0174837	EX_pyr_e (8.49e+00, 8.59e+00)
amp	AMP	AMP	Purine Metabolism	Nitrogen disposal	0.143304	ADK1 (1.15e-01, 1.04e-01); PRPPS (9.56e-03, 8.76e-03); ADSL1 (1.21e-03, 1.10e-03); NTD7 (3.15e-04, 2.84e-04)
dump	dUMP	DUMP	Pyrimidine Metabolism	Nucleotide metabolism	0.146316	URIDK2 (6.33e-03, 5.72e-03)
imp	IMP	IMP	Nucleotide Interconversion	Nucleotide metabolism	0.146316	ADSS (1.21e-03, 1.10e-03)
trp__L	L-tryptophan	L-tryptophan	Extracellular Transport	Extracellular Transport	0.146316	TRPt (5.64e-03, 5.10e-03); r1402 (2.31e-04, 2.09e-04)
datp	dATP	dATP	Nucleotide Metabolism	Nucleotide metabolism	0.146316	NDPK8 (6.29e-04, 5.69e-04); NDPK8m (3.15e-04, 2.84e-04)
utp	UTP	UTP	Pyrimidine Metabolism	Nucleotide metabolism	0.146316	CTPS2 (4.85e-03, 4.38e-03)
cbp	Carbamoyl phosphate	Carbamoyl phosphate	Arginine Biosynthesis	AA other (Cys/Met/Lys/Arg/Pro)	0.146316	r0034 (1.37e-03, 0.00e+00); CBPS (0.00e+00, 1.24e-03)
udp	UDP	UDP	Nucleotide Interconversion	Nucleotide metabolism	0.146316	UMPK2m (6.93e-04, 6.26e-04)
13dpg	3-Phospho-D-glyceroyl phosphate	3-Phospho-D-glyceroyl phosphate	Glycolysis/Gluconeogenesis	Central Energy Metabolism	-0.0124985	GAPD (9.88e+00, 9.97e+00); PGK (9.88e+00, 9.97e+00)
lys__L	L-lysinium(1+)	Lys	Pseudoreactions	Pseudoreactions	0	EX_lys__L_e (5.00e-02, 5.00e-02)
succoa	Succinyl-CoA	Succinyl-CoA	Glyoxylate And Dicarboxylate Metabolism	Glyoxylate And Dicarboxylate Metabolism	-0.0222408	MMMm (8.61e-02, 8.75e-02)
glu__L	L-glutamate(1-)	L-Glu	Extracellular Transport	Extracellular Transport	-0.325328	GLUt4 (7.98e-02, 1.00e-01); r1402 (2.31e-04, 2.09e-04)
succoa	Succinyl-CoA	Succinyl-CoA	2-oxocarboxylic Acid Metabolism	2-oxocarboxylic Acid Metabolism	-0.0450145	AKGDm (1.44e+00, 1.49e+00)
ppi	Diphosphate	PPi	Alanine, Aspartate And Glutamate Metabolism	AA central (A/D/E,G/S/T)	0.146316	GLUPRT (1.77e-03, 1.60e-03)
3pg	3-Phospho-D-glycerate	3-PG	Glycolysis/Gluconeogenesis	Central Energy Metabolism	-0.0125329	PGK (9.88e+00, 9.97e+00); PGM (9.88e+00, 9.96e+00)
pi	hydrogenphosphate	HPO4	Biomass And Maintenance Functions	Biomass And Maintenance Functions	6.76041e-05	ATPM (1.85e+01, 1.85e+01); BIOMASS_maintenance (8.99e-03, 8.13e-03)
2dr1p	2-Deoxy-D-ribose 1-phosphate	2-Deoxy-D-ribose 1-phosphate	Nucleotide Interconversion	Nucleotide metabolism	0.146316	DURIPP (6.11e-03, 5.52e-03)
gln__L	L-glutamine	L-Gln	Arginine Biosynthesis	AA other (Cys/Met/Lys/Arg/Pro)	-0.00394124	GLUNm (4.86e-01, 4.86e-01); CBPS (0.00e+00, 1.24e-03)
pi	hydrogenphosphate	HPO4	Biosynthesis Of Amino Acids	Biosynthesis Of Amino Acids	-1.00047	PCm (8.27e-01, 1.66e+00); r0034 (1.37e-03, 0.00e+00)
met__L	L-methionine	L-Met	Biomass And Maintenance Functions	Biomass And Maintenance Functions	0.146316	BIOMASS_maintenance (8.99e-03, 8.13e-03)
phpyr	keto-phenylpyruvate	Phenylpyruvate	Transport, Mitochondrial	Mitochondrial transport	0.0222934	HUMANGEM_MAR11443 (1.05e+01, 1.03e+01)
clpn_hs	cardiolipin	Cardiolipin	Glycerophospholipid Metabolism	Lipid metabolism	0.146316	CLSm_hs (5.94e-05, 5.36e-05)
2obut	2-Oxobutanoate	Î±-Ketobutyrate	Alanine, Aspartate And Glutamate Metabolism	AA central (A/D/E,G/S/T)	-6	THRD__L (0.00e+00, 2.66e-03)
co2	carbon dioxide	CO2	Alanine, Aspartate And Glutamate Metabolism	AA central (A/D/E,G/S/T)	0.554379	r0295 (4.20e-03, 3.80e-03); r0034 (1.37e-03, 0.00e+00)
gmp	GMP	GMP	Transport, Mitochondrial	Mitochondrial transport	0.541525	HUMANGEM_MAR20139 (5.52e-04, 3.79e-04)
2dr1p	2-Deoxy-D-ribose 1-phosphate	2-Deoxy-D-ribose 1-phosphate	Purine Metabolism	Nitrogen disposal	0.146316	PUNP4 (6.42e-03, 5.80e-03); PUNP2 (3.15e-04, 2.84e-04)
asn__L	L-asparagine	L-asparagine	Biomass And Maintenance Functions	Biomass And Maintenance Functions	0.146316	BIOMASS_maintenance (8.99e-03, 8.13e-03)
adp	ADP	ATP/ADP	Alanine, Aspartate And Glutamate Metabolism	AA central (A/D/E,G/S/T)	0.146316	r0034 (1.37e-03, 0.00e+00); CBPS (0.00e+00, 1.24e-03)
uri	Uridine	Uridine	Pyrimidine Metabolism	Nucleotide metabolism	0.146316	PYNP2r (6.11e-03, 5.52e-03); NTD2 (2.07e-03, 1.87e-03)
nadh	Nicotinamide adenine dinucleotide - reduced	NAD(+)	Urea Cycle	Nitrogen disposal	6	r0074 (4.48e-02, 0.00e+00)
h2o	Water	H2O	Nucleotide Interconversion	Nucleotide metabolism	0.136894	RNDR2 (6.65e-03, 6.01e-03); NTD8 (6.42e-03, 5.80e-03); r0475 (6.02e-03, 5.44e-03); RNDR3 (4.54e-04, 4.10e-04); DUTPDPm (3.15e-04, 2.84e-04); NTD7 (3.15e-04, 2.84e-04); NTD9m (0.00e+00, 1.19e-04)
pmtcoa	Palmitoyl-CoA (n-C16:0CoA)	Palmitoyl-CoA (n-C16:0CoA)	Fatty Acid Degradation	Lipid metabolism	6	r0434 (1.92e-04, 0.00e+00); C160CPT1 (1.92e-04, 0.00e+00)
h	proton	H	Pseudoreactions	Pseudoreactions	-0.013704	EX_h_e (8.34e+00, 8.42e+00)
datp	dATP	dATP	Pyrimidine Synthesis	Nucleotide metabolism	0.146316	RE0452M (3.15e-04, 2.84e-04)
cdpchol	CDPcholine	CDPcholine	Glycerophospholipid Metabolism	Lipid metabolism	0.146316	CEPTC (4.33e-03, 3.91e-03); CHLPCTD (4.33e-03, 3.91e-03)
prpp	5-Phospho-alpha-D-ribose 1-diphosphate	5-Phospho-alpha-D-ribose 1-diphosphate	Nucleotide Metabolism	Nucleotide metabolism	0.116921	GUAPRT (6.42e-03, 5.92e-03)
2hb	2-Hydroxybutyrate	2-Hydroxybutyrate	Extracellular Transport	Extracellular Transport	-6	2HBt2 (0.00e+00, 2.66e-03)
hmgcoa	Hydroxymethylglutaryl-CoA	HMG-CoA	Cholesterol Metabolism	Lipid metabolism	-0.0219846	HMGLm (4.31e-02, 4.38e-02)
nadp	Nicotinamide adenine dinucleotide phosphate	NADP(+)	Pyruvate Metabolism	Central Energy Metabolism	-0.0434524	ME2m (1.57e+00, 1.61e+00)
glyclt	glycolate	Glycolate	Glyoxylate And Dicarboxylate Metabolism	Glyoxylate And Dicarboxylate Metabolism	-0.0128324	GLYCTO1p (9.75e+00, 9.84e+00); GLYCLTDy (9.75e+00, 9.84e+00)
utp	UTP	UTP	Pentose And Glucuronate Interconversions	Redox & Pentose Metabolism	0.146316	GALU (6.93e-04, 6.26e-04)
h2o	Water	H2O	Purine Metabolism	Nitrogen disposal	9.04529e-05	ATPM (1.85e+01, 1.85e+01); NTD8 (6.42e-03, 5.80e-03); PRFGS (1.77e-03, 1.60e-03); GLUPRT (1.77e-03, 1.60e-03); IMPC (1.77e-03, 1.60e-03); NTD7 (3.15e-04, 2.84e-04)
gln__L	L-glutamine	L-Gln	Extracellular Transport	Extracellular Transport	3.21327e-05	GLNtN1 (5.00e-01, 5.00e-01); r1402 (2.31e-04, 2.09e-04)
co2	carbon dioxide	CO2	Purine Synthesis	Nucleotide metabolism	0.146316	AIRCr (1.77e-03, 1.60e-03)
ppi	Diphosphate	PPi	Nucleotide Salvage Pathway	Nucleotide Salvage Pathway	0.116921	GUAPRT (6.42e-03, 5.92e-03)
cbp	Carbamoyl phosphate	Carbamoyl phosphate	Urea Cycle	Nitrogen disposal	6	r0034 (1.37e-03, 0.00e+00)
glu__L	L-glutamate(1-)	L-Glu	Phenylalanine, Tyrosine And Tryptophan Biosynthesis	AAA metabolism (Trp/Phe/Tyr)	0.0222934	PHETA1m (1.05e+01, 1.03e+01); PHETA1 (1.05e+01, 1.03e+01)
5aizc	5-amino-1-(5-phospho-D-ribosyl)imidazole-4-carboxylate	5-Amino-1-(5-phospho-D-ribosyl)imidAzole-4-carboxylate	Purine Synthesis	Nucleotide metabolism	0.146316	PRASCS (1.77e-03, 1.60e-03); AIRCr (1.77e-03, 1.60e-03)
C02470	Xanthurenic acid	Xanthurenic acid	Extracellular Transport	Extracellular Transport	0.146316	r1030 (3.53e-03, 3.19e-03)
pro__L	L-proline	L-Pro	Arginine And Proline Metabolism	AA other (Cys/Met/Lys/Arg/Pro)	-6	PRO1xm (0.00e+00, 4.45e-02)
Lfmkynr	N-formyl-L-kynurenine	N-formyl-L-kynurenine	Tryptophan Metabolism	AAA metabolism (Trp/Phe/Tyr)	0.146316	FKYNH (3.53e-03, 3.19e-03); TRPO2 (3.53e-03, 3.19e-03)
nadp	Nicotinamide adenine dinucleotide phosphate	NADP(+)	Fatty Acid Biosynthesis	Lipid metabolism	0.146316	FAS120COA (4.84e-03, 4.37e-03); FAS140COA (4.84e-03, 4.37e-03); FAS100COA (4.84e-03, 4.37e-03); FAS80COA__L (4.84e-03, 4.37e-03); FAS160COA (4.84e-03, 4.37e-03)
ser__L	L-serine	L-ser	Biomass And Maintenance Functions	Biomass And Maintenance Functions	0.146316	BIOMASS_maintenance (8.99e-03, 8.13e-03)
pram	5-Phospho-beta-D-ribosylamine	5-Phospho-beta-D-ribosylamine	Alanine, Aspartate And Glutamate Metabolism	AA central (A/D/E,G/S/T)	0.146316	GLUPRT (1.77e-03, 1.60e-03)
2oxoadp	2-oxoadipate(2-)	Adipates	Lysine Degradation	AA other (Cys/Met/Lys/Arg/Pro)	-0.0219846	r0450 (4.31e-02, 4.38e-02)
3php	3-phosphonatooxypyruvate(3-)	3-PHP	Glycine, Serine And Threonine Metabolism	AA central (A/D/E,G/S/T)	0.146316	PSERT (4.52e-03, 4.08e-03); PGCD (4.52e-03, 4.08e-03)
mal__L	(S)-malate(2-)	(S)-malate(2-)	Methane Metabolism	Methane Metabolism	-0.0459388	MDH (3.74e-02, 3.87e-02)
2mbcoa	2-methylbutanoyl-CoA(4-)	2-Methylbutanoyl-CoA(4-)	Valine, Leucine And Isoleucine Biosynthesis	BCAA metabolism (Val/Leu/Iso)	-0.014491	r0604 (4.53e-02, 4.57e-02); r0603 (4.53e-02, 4.57e-02)
nadh	Nicotinamide adenine dinucleotide - reduced	NAD(+)	Cysteine And Methionine Metabolism	AA other (Cys/Met/Lys/Arg/Pro)	0.146316	PGCD (4.52e-03, 4.08e-03)
prpp	5-Phospho-alpha-D-ribose 1-diphosphate	5-Phospho-alpha-D-ribose 1-diphosphate	Pyrimidine Synthesis	Nucleotide metabolism	0.146316	ORPT (1.37e-03, 1.24e-03)
gsn	Guanosine	Guanosine	Purine Metabolism	Nitrogen disposal	-6	PUNP3 (0.00e+00, 1.19e-04)
pser__L	O-Phospho-L-serine	O-Phospho-L-serine	Cysteine And Methionine Metabolism	AA other (Cys/Met/Lys/Arg/Pro)	0.146316	PSERT (4.52e-03, 4.08e-03)
pi	hydrogenphosphate	HPO4	Transport, Mitochondrial	Mitochondrial transport	0.0224966	MALtm (9.20e+00, 9.06e+00); HUMANGEM_MAR08651 (1.37e-03, 0.00e+00)
glutcoa	glutaryl-CoA(5-)	Glutaryl-CoA	Tryptophan Metabolism	AAA metabolism (Trp/Phe/Tyr)	-0.0219846	2OXOADOXm (4.31e-02, 4.38e-02); r0541 (4.31e-02, 4.38e-02)
h	proton	H	Glycine, Serine And Threonine Metabolism	AA central (A/D/E,G/S/T)	-0.507103	r0553 (9.85e+00, 1.49e+01); r0552 (9.85e+00, 1.49e+01); r0553m (2.35e+00, 2.42e+00); r0552m (2.35e+00, 2.42e+00); PGCD (4.52e-03, 4.08e-03)
dag_hs	diglyceride	Diglyceride	Glycerophospholipid Metabolism	Lipid metabolism	0.146316	CEPTC (4.33e-03, 3.91e-03); DAGK_hs (4.24e-03, 3.83e-03)
glu__L	L-glutamate(1-)	L-Glu	Lysine Degradation	AA other (Cys/Met/Lys/Arg/Pro)	-0.0219846	r0450 (4.31e-02, 4.38e-02); r0525 (4.31e-02, 4.38e-02)
[truncated: 992 more rows]
