# Supplementary material
Source: Research Square preprint supplement (doi:10.21203/rs.3.rs-9275884/v1)
Supplement: Supplementary file 3 [file 9e3f9e8da7b6253d89081a25.xlsx]

## Sheet: Corrected stoichiometries
Reaction ID	Subsystem	Original formula (iES1300)	Corrected formula (iES1470)	Change type
ACO1	Citric acid cycle	cis-aconitate(3-) + Water <=> ATP + Citrate + Coenzyme A	cis-aconitate(3-) + Water <=> Citrate	Modified stoichiometry
ATPH2e	Nucleotide interconversion	ATP + 2.0 Water --> ADP + 2.0 proton + 2.0 hydrogenphosphate	ADP + Water --> AMP + proton + hydrogenphosphate	Modified stoichiometry
CU2abc	Transport, golgi apparatus	ATP + Copper + Water <=> ADP + Copper + hydrogenphosphate	ATP + Copper + Water <=> ADP + Copper + proton + hydrogenphosphate	Modified stoichiometry
CYOOm2	Oxidative phosphorylation	4.0 Ferrocytochrome C + O2 --> 4.0 Ferricytochrome c + 2.0 Water + 4.0 proton	4.0 Ferrocytochrome C + 4.0 proton + O2 --> 4.0 Ferricytochrome c + 2.0 Water	Modified stoichiometry
CYSIGLUt	Transport, lysosomal	L-cystine + proton <=> L-cystine + L-glutamate(1-)	L-cystine + proton <=> L-cystine + proton	Modified stoichiometry
DAGKn_hs	Glycerophospholipid metabolism	ATP + diglyceride <=> ADP + proton + phosphatidate(2-)	ATP + diglyceride <=> ADP + proton + phosphatidate(2-)	Modified stoichiometry
DHCRD2r	Sphingolipid metabolism	dihydroceramide + Flavin adenine dinucleotide oxidized --> N-acylsphingosine + Flavin adenine dinucleotide reduced	dihydroceramide + Nicotinamide adenine dinucleotide phosphate --> N-acylsphingosine + proton + Nicotinamide adenine dinucleotide phosphate - reduced	Modified stoichiometry
DHDH	Pentose and glucuronate interconversions	proton + Nicotinamide adenine dinucleotide phosphate - reduced + aldehydo-D-xylose <=> Nicotinamide adenine dinucleotide phosphate + D-xylono-1,5-lactone	proton + Nicotinamide adenine dinucleotide phosphate - reduced + D-xylono-1,5-lactone <=> Nicotinamide adenine dinucleotide phosphate + aldehydo-D-xylose	Modified stoichiometry
DOLPGT2_Ler	N-glycan synthesis	0.1 Dolichyl beta-D-glucosyl phosphate, human liver homolog + 0.1 (alpha-D-Glucosyl)2-(alpha-D-mannosyl)8-beta-D-mannosyl-diacetylchitobiosyldiphosphodolichol, human liver homolog --> 0.1 dolichyl phosphate(2-) + 0.1 (alpha-D-Glucosyl)3-(alpha-D-mannosyl)8-beta-D-mannosyl-diacetylchitobiosyldiphosphodolichol, human liver homolog + proton	0.1 Dolichyl beta-D-glucosyl phosphate, human liver homolog + 0.1 alpha-D-Glucosyl-(alpha-D-mannosyl)8-beta-D-mannosyl-diacetylchitobiosyldiphosphodolichol, human liver homolog --> 0.1 dolichyl phosphate(2-) + 0.1 (alpha-D-Glucosyl)2-(alpha-D-mannosyl)8-beta-D-mannosyl-diacetylchitobiosyldiphosphodolichol, human liver homolog + proton	Modified stoichiometry
DOLPGT2_Uer	N-glycan synthesis	0.1 Dolichyl beta-D-glucosyl phosphate, human uterine homolog + 0.1 (alpha-D-Glucosyl)2-(alpha-D-mannosyl)8-beta-D-mannosyl-diacetylchitobiosyldiphosphodolichol, human uterine homolog --> 0.1 dolichyl phosphate(2-) + 0.1 (alpha-D-Glucosyl)3-(alpha-D-mannosyl)8-beta-D-mannosyl-diacetylchitobiosyldiphosphodolichol, human uterine homolog + proton	0.1 Dolichyl beta-D-glucosyl phosphate, human uterine homolog + 0.1 alpha-D-Glucosyl-(alpha-D-mannosyl)8-beta-D-mannosyl-diacetylchitobiosyldiphosphodolichol, human uterine homolog --> 0.1 dolichyl phosphate(2-) + 0.1 (alpha-D-Glucosyl)2-(alpha-D-mannosyl)8-beta-D-mannosyl-diacetylchitobiosyldiphosphodolichol, human uterine homolog + proton	Modified stoichiometry
DOLPGT3_Ler	N-glycan synthesis	0.1 dolichyl phosphate(2-) + Water --> 0.1 Dolichol, human liver homolog + hydrogenphosphate	0.1 Dolichyl beta-D-glucosyl phosphate, human liver homolog + 0.1 alpha-D-Glucosyl-(alpha-D-mannosyl)8-beta-D-mannosyl-diacetylchitobiosyldiphosphodolichol, human liver homolog --> 0.1 dolichyl phosphate(2-) + 0.1 (alpha-D-Glucosyl)2-(alpha-D-mannosyl)8-beta-D-mannosyl-diacetylchitobiosyldiphosphodolichol, human liver homolog + proton	Modified stoichiometry
DOLPGT3_Uer	N-glycan synthesis	0.1 dolichyl phosphate(2-) + Water --> 0.1 Dolichol, human uterine homolog + hydrogenphosphate	0.1 Dolichyl beta-D-glucosyl phosphate, human uterine homolog + 0.1 alpha-D-Glucosyl-(alpha-D-mannosyl)8-beta-D-mannosyl-diacetylchitobiosyldiphosphodolichol, human uterine homolog --> 0.1 dolichyl phosphate(2-) + 0.1 (alpha-D-Glucosyl)2-(alpha-D-mannosyl)8-beta-D-mannosyl-diacetylchitobiosyldiphosphodolichol, human uterine homolog + proton	Modified stoichiometry
DOLPMT2_Ler	N-glycan synthesis	0.1 Dolichyl phosphate D-mannose, human liver homolog + 0.1 (alpha-D-Mannosyl)7-beta-D-mannosyl-diacetylchitobiosyldiphosphodolichol, human liver homolog --> 0.1 dolichyl phosphate(2-) + proton + 0.1 (alpha-D-Mannosyl)8-beta-D-mannosyl-diacetylchitobiosyldiphosphodolichol, human liver homolog	0.1 Dolichyl phosphate D-mannose, human liver homolog + 0.1 (alpha-D-Mannosyl)6-beta-D-mannosyl-diacetylchitobiosyldiphosphodolichol, human liver homolog --> 0.1 dolichyl phosphate(2-) + proton + 0.1 (alpha-D-Mannosyl)7-beta-D-mannosyl-diacetylchitobiosyldiphosphodolichol, human liver homolog	Modified stoichiometry
DOLPMT2_Uer	N-glycan synthesis	0.1 Dolichyl phosphate D-mannose, human uterine homolog + 0.1 (alpha-D-Mannosyl)7-beta-D-mannosyl-diacetylchitobiosyldiphosphodolichol, human uterine homolog --> 0.1 dolichyl phosphate(2-) + proton + 0.1 (alpha-D-Mannosyl)8-beta-D-mannosyl-diacetylchitobiosyldiphosphodolichol, human uterine homolog	0.1 Dolichyl phosphate D-mannose, human uterine homolog + 0.1 (alpha-D-Mannosyl)6-beta-D-mannosyl-diacetylchitobiosyldiphosphodolichol, human uterine homolog --> 0.1 dolichyl phosphate(2-) + proton + 0.1 (alpha-D-Mannosyl)7-beta-D-mannosyl-diacetylchitobiosyldiphosphodolichol, human uterine homolog	Modified stoichiometry
DOLPMT3_Ler	N-glycan synthesis	0.1 dolichyl phosphate(2-) + GDP-alpha-D-mannose(2-) --> 0.1 Dolichyl phosphate D-mannose, human liver homolog + GDP	0.1 Dolichyl phosphate D-mannose, human liver homolog + 0.1 (alpha-D-Mannosyl)6-beta-D-mannosyl-diacetylchitobiosyldiphosphodolichol, human liver homolog --> 0.1 dolichyl phosphate(2-) + proton + 0.1 (alpha-D-Mannosyl)7-beta-D-mannosyl-diacetylchitobiosyldiphosphodolichol, human liver homolog	Modified stoichiometry
DOLPMT3_Uer	N-glycan synthesis	0.1 dolichyl phosphate(2-) + GDP-alpha-D-mannose(2-) --> 0.1 Dolichyl phosphate D-mannose, human uterine homolog + GDP	0.1 Dolichyl phosphate D-mannose, human uterine homolog + 0.1 (alpha-D-Mannosyl)6-beta-D-mannosyl-diacetylchitobiosyldiphosphodolichol, human uterine homolog --> 0.1 dolichyl phosphate(2-) + proton + 0.1 (alpha-D-Mannosyl)7-beta-D-mannosyl-diacetylchitobiosyldiphosphodolichol, human uterine homolog	Modified stoichiometry
DOLPMT4_Ler	N-glycan synthesis	0.1 dolichyl phosphate(2-) --> 0.1 dolichyl phosphate(2-)	0.1 Dolichyl phosphate D-mannose, human liver homolog + 0.1 (alpha-D-Mannosyl)6-beta-D-mannosyl-diacetylchitobiosyldiphosphodolichol, human liver homolog --> 0.1 dolichyl phosphate(2-) + proton + 0.1 (alpha-D-Mannosyl)7-beta-D-mannosyl-diacetylchitobiosyldiphosphodolichol, human liver homolog	Modified stoichiometry
DOLPMT4_Uer	N-glycan synthesis	0.1 dolichyl phosphate(2-) --> 0.1 dolichyl phosphate(2-)	0.1 Dolichyl phosphate D-mannose, human uterine homolog + 0.1 (alpha-D-Mannosyl)6-beta-D-mannosyl-diacetylchitobiosyldiphosphodolichol, human uterine homolog --> 0.1 dolichyl phosphate(2-) + proton + 0.1 (alpha-D-Mannosyl)7-beta-D-mannosyl-diacetylchitobiosyldiphosphodolichol, human uterine homolog	Modified stoichiometry
DORNOm	Arginine and Proline Metabolism	Water + O2 + D-ornithinium(1+) --> 5-amino-2-oxopentanoic acid + Hydrogen peroxide + Ammonium	Water + O2 + D-ornithinium(1+) --> 5-amino-2-oxopentanoic acid + Hydrogen peroxide + Ammonium	Modified stoichiometry
DPROO	Arginine and Proline Metabolism	O2 + D-proline --> 1-pyrroline-2-carboxylate + Hydrogen peroxide + proton	O2 + D-proline --> 1-pyrroline-2-carboxylate + Hydrogen peroxide + proton	Modified stoichiometry
DPROOm	Arginine and Proline Metabolism	O2 + D-proline --> 1-pyrroline-2-carboxylate + Hydrogen peroxide + proton	O2 + D-proline --> 1-pyrroline-2-carboxylate + Hydrogen peroxide + proton	Modified stoichiometry
DURIPPn	Nucleotide interconversion	Deoxyuridine + hydrogenphosphate <=> 2-Deoxy-D-ribose 1-phosphate + uracil	Deoxyuridine + hydrogenphosphate <=> 2-Deoxy-D-ribose 1-phosphate + uracil	Modified stoichiometry
ETHAK	Glycerophospholipid metabolism	ATP + etha[c] --> ADP + O-phosphonatoethanaminium(1-) + proton	ATP + Ethanolamine --> ADP + O-phosphonatoethanaminium(1-) + proton	Modified stoichiometry
ETHPcm	Glycerophospholipid metabolism	O-phosphonatoethanaminium(1-) + Water --> etha[c] + hydrogenphosphate	O-phosphonatoethanaminium(1-) + Water --> Ethanolamine + hydrogenphosphate	Modified stoichiometry
G12MT2_L	N-glycan synthesis	GDP-alpha-D-mannose(2-) + 0.1 (alpha-D-mannosyl)3-beta-D-mannosyl-diacetylchitodiphosphodolichol, human liver homolog --> GDP + proton + 0.1 (alpha-D-Mannosyl)4-beta-D-mannosyl-diacetylchitobiosyldiphosphodolichol, human liver homolog	GDP-alpha-D-mannose(2-) + 0.1 (alpha-D-mannosyl)2-beta-D-mannosyl-diacetylchitobiosyldiphosphodolichol, human liver homolog --> GDP + proton + 0.1 (alpha-D-mannosyl)3-beta-D-mannosyl-diacetylchitodiphosphodolichol, human liver homolog	Modified stoichiometry
G6PDH1rer	Pentose phosphate pathway	D-Glucose 6-phosphate + Nicotinamide adenine dinucleotide <=> 6-Phospho-D-gluconate + proton + Nicotinamide adenine dinucleotide - reduced	D-Glucose 6-phosphate + Nicotinamide adenine dinucleotide phosphate <=> 6-phospho-D-glucono-1,5-lactone + proton + Nicotinamide adenine dinucleotide phosphate - reduced	Modified stoichiometry
GLOX2	Ascorbate and aldarate metabolism	L-gulono-1,4-lactone + O2 <=> Hydrogen peroxide + L-xylo-Hexulonolactone	L-gulono-1,4-lactone + O2 <=> Hydrogen peroxide + proton + L-xylo-Hexulonolactone	Modified stoichiometry
H8MTer_U	Phosphatidylinositol phosphate metabolism	0.1 Dolichyl phosphate D-mannose, human liver homolog + {[PE-Man-],[PE-]Man},{PE-}Man-GlcN-acylPI --> 0.1 dolichyl phosphate(2-) + proton + 10fthf5glu[c]	0.1 Dolichyl phosphate D-mannose, human liver homolog + {[PE-Man-],[PE-]Man},{PE-}Man-GlcN-acylPI --> 0.1 dolichyl phosphate(2-) + proton + 10fthf5glu_c	Modified stoichiometry
HMR_5389	Methionine and cysteine metabolism	1,2-Dihydroxy-5-(Methylthio)Pent-1-En-3-One + O2 --> 2-keto-4-methylthiobutyrate + Formate	1,2-Dihydroxy-5-(Methylthio)Pent-1-En-3-One + O2 --> 2-keto-4-methylthiobutyrate + Formate + 2.0 proton	Modified stoichiometry
HMR_6771	Phenylalanine metabolism	3-(4-hydroxyphenyl)pyruvate + proton --> 2-Hydroxy-3-(4-Hydroxyphenyl)Propenoate	3-(4-hydroxyphenyl)pyruvate --> 2-Hydroxy-3-(4-Hydroxyphenyl)Propenoate	Modified stoichiometry
HMR_9464	Starch and sucrose metabolism	Dextrin + Water --> Dextrin(N-1) + D-glucose	Dextrin --> Dextrin(N-1) + D-glucose	Modified stoichiometry
HMR_9484	Nucleotide interconversion	P1,P4-Bis(5-Guanosyl) Tetraphosphate + Water --> GMP + GTP	P1,P4-Bis(5-Guanosyl) Tetraphosphate + Water --> GMP + GTP + 2.0 proton	Modified stoichiometry
HMR_9801	Miscellaneous	GTP + proton + erythro-5-hydroxy-L-lysinium(1+) <=> 5-Phosphonooxy-L-Lysine + GDP	GTP + erythro-5-hydroxy-L-lysinium(1+) <=> 5-Phosphonooxy-L-Lysine + GDP	Modified stoichiometry
HMR_9807	Miscellaneous	5-Phosphonooxy-L-Lysine + Water --> L-allysine + proton + Ammonium + hydrogenphosphate	5-Phosphonooxy-L-Lysine + Water --> L-allysine + Ammonium + hydrogenphosphate	Modified stoichiometry
LPS2	Triacylglycerol synthesis	diglyceride + Water --> R total + proton + monoacylglycerol 2	Water + triglyceride --> R total 3 position + diglyceride + proton	Modified stoichiometry
LPS2e	Triacylglycerol synthesis	diglyceride + Water --> R total + proton + monoacylglycerol 2	Water + triglyceride --> R total 3 position + diglyceride + proton	Modified stoichiometry
LYSMTF2n	Lysine metabolism	Histone N6-methyl-L-lysine + S-Adenosyl-L-methionine --> Protein N6,N6-dimethyl-L-lysine + S-Adenosyl-L-homocysteine	S-Adenosyl-L-methionine + Peptidyl-L-lysine --> Histone N6-methyl-L-lysine + S-Adenosyl-L-homocysteine	Modified stoichiometry
LYSMTF3n	Lysine metabolism	Protein N6,N6-dimethyl-L-lysine + S-Adenosyl-L-methionine --> Protein N6,N6,N6-trimethyl-L-lysine + S-Adenosyl-L-homocysteine	S-Adenosyl-L-methionine + Peptidyl-L-lysine --> Histone N6-methyl-L-lysine + S-Adenosyl-L-homocysteine	Modified stoichiometry
ORPT	Pyrimidine synthesis	Orotidine 5-phosphate + Diphosphate <=> Orotate + 5-Phospho-alpha-D-ribose 1-diphosphate	Orotate + 5-Phospho-alpha-D-ribose 1-diphosphate --> Orotidine 5-phosphate + Diphosphate	Modified stoichiometry
PSERT	Glycine, serine, alanine and threonine metabolism	3-phosphonatooxypyruvate(3-) + L-glutamate(1-) --> 2-Oxoglutarate + proton + O-Phospho-L-serine	3-phosphonatooxypyruvate(3-) + L-glutamate(1-) --> 2-Oxoglutarate + O-Phospho-L-serine	Modified stoichiometry
PSP_Lm	Glycine, serine, alanine and threonine metabolism	Water + proton + O-Phospho-L-serine --> hydrogenphosphate + L-serine	Water + O-Phospho-L-serine --> hydrogenphosphate + L-serine	Modified stoichiometry
PSP_Lr	Glycine, serine, alanine and threonine metabolism	Water + proton + O-Phospho-L-serine --> hydrogenphosphate + L-serine	Water + O-Phospho-L-serine --> hydrogenphosphate + L-serine	Modified stoichiometry
PSSA2er_hs	Glycerophospholipid metabolism	phosphatidylethanolamine + L-serine <=> etha[c] + phosphatidylserine	phosphatidylethanolamine + L-serine <=> Ethanolamine + phosphatidylserine	Modified stoichiometry
R07492	Steroid biosynthesis	5-Dehydroavenasterol <=> 24-methylenecholesterol	5-dehydroepisterol <=> 24-methylenecholesterol	Modified stoichiometry
RE1978C	Eicosanoid metabolism	Anandamide + Water <=> arachidonate + etha[c]	Anandamide + Water <=> arachidonate + Ethanolamine	Modified stoichiometry
RE2028C	Miscellaneous	3,4-dihydro-1,4-benzothiazine-3-carboxylate --> benzothiazine + carbon dioxide + 2.0 proton	3,4-dihydro-1,4-benzothiazine-3-carboxylate --> benzothiazine + carbon dioxide + proton	Modified stoichiometry
RE3052C	Heme synthesis	Coproporphyrinogen III + 2.0 proton --> Coproporphyrin III	Coproporphyrinogen III --> Coproporphyrin III + 6.0 proton	Modified stoichiometry
RE3417C	Linoleate metabolism	1-hydroperoxy-8-carboxyoctyl 3,4-epoxynon-(2E)-enyl ether <=> Azelaic acid + 3,4-epoxynonanal + proton	1-hydroperoxy-8-carboxyoctyl 3,4-epoxynon-(2E)-enyl ether <=> Azelaic acid + 3,4-epoxynonanal + 3.0 proton	Modified stoichiometry
RE3420C	Linoleate metabolism	1-hydroperoxy-8-carboxyoctyl 3,4-epoxynon-(2E)-enyl ether <=> Azelaic acid + 4-oxo-2-nonenal + 3.0 proton	1-hydroperoxy-8-carboxyoctyl 3,4-epoxynon-(2E)-enyl ether <=> Azelaic acid + 4-oxo-2-nonenal + 5.0 proton	Modified stoichiometry
RE3637C	Heme synthesis	2.0 proton + Uroporphyrinogen III --> Uroporphyrin I	Uroporphyrinogen III --> Uroporphyrin I + 6.0 proton	Modified stoichiometry
UDPGP	Starch and sucrose metabolism	Water + UTP --> 2.0 proton + 2.0 hydrogenphosphate + UMP	Water + UTP --> proton + Diphosphate + UMP	Modified stoichiometry
UGT1A10r	Steroid metabolism	bilirubin(2-) + 2.0 proton + UDP-D-glucuronate <=> mono(glucosyluronic acid)bilirubin(2-) + UDP	bilirubin(2-) + UDP-D-glucuronate <=> mono(glucosyluronic acid)bilirubin(2-) + UDP	Modified stoichiometry
r0023	Aminosugar metabolism	2.0 Ferricytochrome b5 + Nicotinamide adenine dinucleotide - reduced --> 2.0 Ferrocytochrome b5 + Nicotinamide adenine dinucleotide	2.0 Ferricytochrome b5 + Nicotinamide adenine dinucleotide - reduced --> 2.0 Ferrocytochrome b5 + proton + Nicotinamide adenine dinucleotide	Modified stoichiometry
r0023cm	Aminosugar metabolism	2.0 Ferricytochrome b5 + Nicotinamide adenine dinucleotide - reduced --> 2.0 Ferrocytochrome b5 + Nicotinamide adenine dinucleotide	2.0 Ferricytochrome b5 + Nicotinamide adenine dinucleotide - reduced --> 2.0 Ferrocytochrome b5 + proton + Nicotinamide adenine dinucleotide	Modified stoichiometry
r0023r	Aminosugar metabolism	2.0 Ferricytochrome b5 + Nicotinamide adenine dinucleotide - reduced --> 2.0 Ferrocytochrome b5 + Nicotinamide adenine dinucleotide	2.0 Ferricytochrome b5 + Nicotinamide adenine dinucleotide - reduced --> 2.0 Ferrocytochrome b5 + proton + Nicotinamide adenine dinucleotide	Modified stoichiometry
r0220	Propanoate metabolism	Propinol adenylate + Coenzyme A --> AMP + 2.0 proton + Propanoyl-CoA	Propinol adenylate + Coenzyme A --> AMP + proton + Propanoyl-CoA	Modified stoichiometry
r0221	Propanoate metabolism	Propinol adenylate + Coenzyme A --> AMP + 2.0 proton + Propanoyl-CoA	Propinol adenylate + Coenzyme A --> AMP + proton + Propanoyl-CoA	Modified stoichiometry
r0391	NAD metabolism	Nicotinate D-ribonucleotide + Diphosphate <=> proton + Nicotinate + 5-Phospho-alpha-D-ribose 1-diphosphate	proton + Nicotinate + 5-Phospho-alpha-D-ribose 1-diphosphate --> Nicotinate D-ribonucleotide + Diphosphate	Modified stoichiometry
r0391n	NAD metabolism	Nicotinate D-ribonucleotide + Diphosphate <=> proton + Nicotinate + 5-Phospho-alpha-D-ribose 1-diphosphate	proton + Nicotinate + 5-Phospho-alpha-D-ribose 1-diphosphate --> Nicotinate D-ribonucleotide + Diphosphate	Modified stoichiometry
r0510	Unassigned	2.0 Ferrocytochrome b5 + O2 + Palmitoyl-CoA (n-C16:0CoA) --> 2.0 Ferricytochrome b5 + palmitoleyl-CoA(4-) + 2.0 Water	2.0 Ferrocytochrome b5 + 2.0 proton + O2 + Palmitoyl-CoA (n-C16:0CoA) --> 2.0 Ferricytochrome b5 + palmitoleyl-CoA(4-) + 2.0 Water	Modified stoichiometry
r0584	NAD metabolism	Water + Nicotinamide adenine dinucleotide <=> AMP + 2.0 proton + Nicotinate D-ribonucleotide	Deamino-NAD+ + Water <=> AMP + 2.0 proton + Nicotinate D-ribonucleotide	Modified stoichiometry
r0701	Fatty acid synthesis	10fthf5glu[c] + Nicotinamide adenine dinucleotide phosphate --> 3-Oxotetradecanoyl-ACP + Nicotinamide adenine dinucleotide phosphate - reduced	10fthf5glu_c + Nicotinamide adenine dinucleotide phosphate --> 3-Oxotetradecanoyl-ACP + proton + Nicotinamide adenine dinucleotide phosphate - reduced	Modified stoichiometry
r0702	Fatty acid synthesis	10fthf5glu[c] --> (2E)-Tetradecenoyl-ACP + Water	10fthf5glu_c --> (2E)-Tetradecenoyl-ACP + Water	Modified stoichiometry
r0729	Fatty acid oxidation	trans-dec-2-enoyl-CoA(4-) + Water --> (S)-Hydroxydecanoyl-CoA	(S)-Hydroxydecanoyl-CoA --> trans-dec-2-enoyl-CoA(4-) + Water	Modified stoichiometry
r1383e	Folate metabolism	THF-hexaglutamate --> 6.0 L-glutamate(1-) + 5,6,7,8-Tetrahydrofolate	heptaglutamyl folate (THF) + 6.0 Water --> 6.0 L-glutamate(1-) + 5,6,7,8-Tetrahydrofolate	Modified stoichiometry
r1445	Fatty acid oxidation	Decanoyl-CoA (n-C10:0CoA) + O2 --> trans-dec-2-enoyl-CoA(4-) + Hydrogen peroxide	trans-dec-2-enoyl-CoA(4-) + O2 --> Decanoyl-CoA (n-C10:0CoA) + Hydrogen peroxide	Modified stoichiometry
r1477	Fatty acid oxidation	(S)-3-hydroxyoleyleoyl-CoA + Nicotinamide adenine dinucleotide --> 3-oxooleoyl-CoA + Nicotinamide adenine dinucleotide - reduced	(S)-3-hydroxyoleyleoyl-CoA + Nicotinamide adenine dinucleotide --> 3-oxooleoyl-CoA + proton + Nicotinamide adenine dinucleotide - reduced	Modified stoichiometry
SK_Tyr_ggn_c	Intracellular source/sink	Tyr-194 of apo-glycogenin protein (primer for glycogen synthesis) --> ∅	—	Deleted in iES1470
SK_btn(c)	Intracellular source/sink	Biotin --> ∅	—	Deleted in iES1470
SK_pmtcoa_c	Intracellular source/sink	Palmitoyl-CoA (n-C16:0CoA) --> ∅	—	Deleted in iES1470
SORD	Pentose and glucuronate interconversions	proton + Nicotinamide adenine dinucleotide phosphate - reduced + aldehydo-D-xylose <=> ATP + D-xylulose	—	Deleted in iES1470
UGT	Ascorbate and aldarate metabolism	Water + UDPglucose <=> D-glucuronate + UDP	—	Deleted in iES1470
12dgr120_transport_c_g	1,2-Diacyl-sn-glycerol transport (cytosol <=> g)	—	12dgr120_c <=> 12dgr120_g	Add in iES1470
12dgr120_transport_c_n	1,2-Diacyl-sn-glycerol transport (cytosol <=> n)	—	12dgr120_c <=> 12dgr120_n	Add in iES1470
12dgr120_transport_c_r	1,2-Diacyl-sn-glycerol transport (cytosol <=> r)	—	12dgr120_c <=> 12dgr120_r	Add in iES1470
12dgr120_transport_c_w	1,2-Diacyl-sn-glycerol transport (cytosol <=> w)	—	12dgr120_c <=> 12dgr120_w	Add in iES1470
XYLTD__D	Xylitol dehydrogenase D xyulose forming	—	nad_c + xylt_c <=> h_c + nadh_c + xylu__D_c	Add in iES1470
DM_sprm_c	spermine(4+) demand	—	sprm_c --> ∅	Add in iES1470

## Sheet: HumanGEM transport reactions
Reaction ID	Reaction formula
HUMANGEM_MAR00057	Acetyl-CoA <=> Acetyl-CoA
HUMANGEM_MAR00066	proton <=> L-alanine + proton
HUMANGEM_MAR00097	Butyrate (n-C4:0) + proton <=> butyrate + proton
HUMANGEM_MAR00120	CDP-diacylglycerol(2-) <=> CDP-diacylglycerol(2-)
HUMANGEM_MAR00130	carbon dioxide <=> carbon dioxide
HUMANGEM_MAR00140	diglyceride --> diglyceride
HUMANGEM_MAR00316	Dolichyl beta-D-glucosyl phosphate, human liver homolog --> Dolichyl beta-D-glucosyl phosphate, human liver homolog
HUMANGEM_MAR00461	Phosphatidylcholine <=> Phosphatidylcholine
HUMANGEM_MAR00462	lysophosphatidylcholine <=> lysophosphatidylcholine
HUMANGEM_MAR00466	phosphatidylserine <=> phosphatidylserine
HUMANGEM_MAR00467	1-phosphatidyl-1D-myo-inositol(1-) <=> 1-phosphatidyl-1D-myo-inositol(1-)
HUMANGEM_MAR00587	cardiolipin <=> cardiolipin
HUMANGEM_MAR00713	2-Oxoglutarate + Isocitrate --> 2-Oxoglutarate + Isocitrate
HUMANGEM_MAR00717	CMP <=> CMP
HUMANGEM_MAR00730	N-acylsphingosine <=> N-acylsphingosine
HUMANGEM_MAR00731	N-acylsphingosine --> N-acylsphingosine
HUMANGEM_MAR00734	Phosphatidylcholine <=> Phosphatidylcholine
HUMANGEM_MAR00771	sphingomyelin betaine <=> sphingomyelin betaine
HUMANGEM_MAR00796	sphingomyelin betaine <=> sphingomyelin betaine
HUMANGEM_MAR00917	UMP --> UMP
HUMANGEM_MAR00918	UDP-D-galactose(2-) + UMP <=> UDP-D-galactose(2-) + UMP
HUMANGEM_MAR00984	arachidonate <=> arachidonate
HUMANGEM_MAR01035	Reduced glutathione <=> Reduced glutathione
HUMANGEM_MAR01046	Fe2+ + proton --> Fe2+ + proton
HUMANGEM_MAR01051	Farnesyl diphosphate <=> Farnesyl diphosphate
HUMANGEM_MAR01094	leukotriene A4(1-) <=> leukotriene A4(1-)
HUMANGEM_MAR01311	prostaglandin H2(1-) <=> prostaglandin H2(1-)
HUMANGEM_MAR01368	glycocholate <=> glycocholate
HUMANGEM_MAR01438	trans-Hexadec-2-enoyl-CoA <=> trans-Hexadec-2-enoyl-CoA
HUMANGEM_MAR01443	(R)-mevalonate <=> (R)-mevalonate
HUMANGEM_MAR01561	Octanoyl-CoA (n-C8:0CoA) <=> Octanoyl-CoA (n-C8:0CoA)
HUMANGEM_MAR01562	Octadecenoyl-CoA (n-C18:1CoA) <=> Octadecenoyl-CoA (n-C18:1CoA)
HUMANGEM_MAR01579	phosphatidate(2-) <=> phosphatidate(2-)
HUMANGEM_MAR01580	phosphatidate(2-) <=> phosphatidate(2-)
HUMANGEM_MAR01592	ATP + Water + 7alpha,12alpha-Dihydroxycholest-4-en-3-one --> ADP + proton + hydrogenphosphate + 7alpha,12alpha-Dihydroxycholest-4-en-3-one
HUMANGEM_MAR01659	ATP + choloyl-CoA(4-) + Water --> ADP + choloyl-CoA(4-) + proton + hydrogenphosphate
HUMANGEM_MAR01661	ATP + Water + phosphatidylserine --> ADP + proton + hydrogenphosphate + phosphatidylserine
HUMANGEM_MAR01717	Chenodeoxyglycocholoyl-CoA <=> chenodeoxycholoyl coenzyme a
HUMANGEM_MAR01725	Chenodeoxyglycocholoyl-CoA <=> chenodeoxycholoyl coenzyme a
HUMANGEM_MAR01732	taurocholate <=> taurocholate
HUMANGEM_MAR01791	proton + Thiamin --> proton + Thiamin
HUMANGEM_MAR02008	11-Deoxycorticosterone --> 11-deoxycorticosterone
HUMANGEM_MAR02039	estrone <=> estrone
HUMANGEM_MAR02275	choloyl-CoA(4-) <=> choloyl-CoA(4-)
HUMANGEM_MAR02360	Reduced thioredoxin --> Reduced thioredoxin
HUMANGEM_MAR03008	ATP + Water + Propanoyl-CoA --> ADP + proton + hydrogenphosphate + Propanoyl-CoA
HUMANGEM_MAR03011	ATP + Water + Palmitoyl-CoA (n-C16:0CoA) --> ADP + proton + hydrogenphosphate + Palmitoyl-CoA (n-C16:0CoA)
HUMANGEM_MAR03106	Acetyl-CoA <=> Acetyl-CoA
HUMANGEM_MAR03850	Sarcosine <=> Sarcosine
HUMANGEM_MAR03953	6-Phospho-D-gluconate <=> 6-Phospho-D-gluconate
HUMANGEM_MAR04126	UDP-alpha-D-xylose(2-) + UMP --> UDP-D-xylose + UMP
HUMANGEM_MAR04274	Deamino-NAD+ <=> Deamino-NAD+
HUMANGEM_MAR04275	Nicotinate D-ribonucleotide <=> Nicotinate D-ribonucleotide
HUMANGEM_MAR04393	Dihydroxyacetone phosphate <=> Dihydroxyacetone phosphate
HUMANGEM_MAR04469	3-hydroxypyruvate <=> 3-hydroxypyruvate
HUMANGEM_MAR04535	CMP-N-acetyl-beta-neuraminate(2-) <=> CMP-N-acetyl-beta-neuraminate(2-)
HUMANGEM_MAR04538	4a-hydroxytetrahydrobiopterin <=> 4a-hydroxytetrahydrobiopterin
HUMANGEM_MAR04720	pantetheine <=> pantetheine
HUMANGEM_MAR04729	N-[(R)-pantothenoyl]-L-cysteinate <=> N-[(R)-pantothenoyl]-L-cysteinate
HUMANGEM_MAR04790	L-alanine <=> L-alanine
HUMANGEM_MAR04846	AMP + ATP <=> AMP + ATP
HUMANGEM_MAR04881	UDP-N-acetyl-alpha-D-glucosamine(2-) + UMP --> UDP-N-acetyl-alpha-D-glucosamine(2-) + UMP
HUMANGEM_MAR04902	O2 <=> O2
HUMANGEM_MAR04906	ADP + ATP --> ADP + ATP
HUMANGEM_MAR04907	ADP + ATP --> ADP + ATP
HUMANGEM_MAR04908	ADP + ATP <=> ADP + ATP
HUMANGEM_MAR04930	proton + pyruvate <=> proton + pyruvate
HUMANGEM_MAR04941	CMP <=> CMP
HUMANGEM_MAR04944	Formate <=> Formate
HUMANGEM_MAR04951	Urea <=> Urea
HUMANGEM_MAR04959	Putrescine <=> Putrescine
HUMANGEM_MAR04971	Citrate + Phosphoenolpyruvate <=> Citrate + Phosphoenolpyruvate
HUMANGEM_MAR04986	Taurine <=> Taurine
HUMANGEM_MAR04997	Deoxyguanosine --> Deoxyguanosine
HUMANGEM_MAR04998	dGMP --> dGMP
HUMANGEM_MAR05015	(R)-3-hydroxybutyrate + proton --> (R)-3-hydroxybutyrate + proton
HUMANGEM_MAR05027	D-glucose <=> D-glucose
HUMANGEM_MAR05031	Adenosine <=> Adenosine
HUMANGEM_MAR05033	Thymidine <=> Thymidine
HUMANGEM_MAR05036	Guanosine --> Guanosine
HUMANGEM_MAR05047	hydrogenphosphate --> hydrogenphosphate
HUMANGEM_MAR05058	L-phenylalanine --> L-phenylalanine
HUMANGEM_MAR05062	L-tyrosine --> L-tyrosine
HUMANGEM_MAR05067	L-glutamate(1-) --> L-glutamate(1-)
HUMANGEM_MAR05096	L-asparagine --> L-asparagine
HUMANGEM_MAR05099	proton + L-tyrosine --> proton + L-tyrosine
HUMANGEM_MAR05109	proton + L-leucine --> proton + L-leucine
HUMANGEM_MAR05112	L-methionine --> L-methionine
HUMANGEM_MAR05115	proton + L-phenylalanine --> proton + L-phenylalanine
HUMANGEM_MAR05116	proton + L-phenylalanine --> proton + L-phenylalanine
HUMANGEM_MAR05121	L-cysteine --> L-cysteine
HUMANGEM_MAR05223	Reduced thioredoxin --> Reduced thioredoxin
HUMANGEM_MAR05344	proton + hydrogenphosphate <=> proton + hydrogenphosphate
HUMANGEM_MAR05354	CDPcholine <=> CDPcholine
HUMANGEM_MAR05362	Propanoyl-CoA <=> Propanoyl-CoA
HUMANGEM_MAR05420	Fe2+ --> Fe2+
HUMANGEM_MAR05422	Diphosphate <=> Diphosphate
HUMANGEM_MAR05424	N-acetylneuraminate <=> N-acetylneuraminate
HUMANGEM_MAR06107	mono(glucosyluronic acid)bilirubin(2-) + Reduced glutathione + Bicarbonate <=> mono(glucosyluronic acid)bilirubin(2-) + Reduced glutathione + Bicarbonate
HUMANGEM_MAR06303	proton + L-histidine + L-lysinium(1+) --> proton + L-histidine + L-lysinium(1+)
HUMANGEM_MAR06385	UMP --> UDP-D-galactose(2-) + UMP
HUMANGEM_MAR06389	Glycerol 3-phosphate + hydrogenphosphate --> Glycerol 3-phosphate + hydrogenphosphate
HUMANGEM_MAR06578	ATP <=> ATP
HUMANGEM_MAR06618	proton + Reduced thioredoxin --> proton + Reduced thioredoxin
HUMANGEM_MAR06620	proton + Oxidized thioredoxin --> proton + Oxidized thioredoxin
HUMANGEM_MAR06781	3-(4-hydroxyphenyl)pyruvate + proton <=> 3-(4-hydroxyphenyl)pyruvate + proton
HUMANGEM_MAR07178	2.0 Phosphatidylethanolamine (gallus gallus) <=> 2.0 phosphatidylethanolamine
HUMANGEM_MAR07196	proton <=> N-acetylneuraminate + proton
HUMANGEM_MAR07204	UMP <=> UDP-D-glucuronate + UMP
HUMANGEM_MAR07252	aldehydo-D-xylose --> aldehydo-D-xylose
HUMANGEM_MAR07257	dolichyl phosphate(2-) --> dolichyl phosphate(2-)
HUMANGEM_MAR07272	Dolichyl phosphate D-mannose, human liver homolog --> Dolichyl phosphate D-mannose, human liver homolog
HUMANGEM_MAR07273	(alpha-D-Mannosyl)4-beta-D-mannosyl-diacetylchitobiosyldiphosphodolichol, human liver homolog --> (alpha-D-Mannosyl)4-beta-D-mannosyl-diacetylchitobiosyldiphosphodolichol, human liver homolog
HUMANGEM_MAR07430	D-Mannose --> D-Mannose
HUMANGEM_MAR07435	UDP-N-acetyl-alpha-D-glucosamine(2-) --> UDP-N-acetyl-alpha-D-glucosamine(2-)
HUMANGEM_MAR07635	3.0 Adrenaline + 2.0 ATP + 2.0 Water --> 2.0 ADP + 3.0 Adrenaline + 2.0 proton + 2.0 hydrogenphosphate
HUMANGEM_MAR07675	D-glucose <=> D-glucose
HUMANGEM_MAR07705	glycolate --> glycolate
HUMANGEM_MAR07707	glyoxylate <=> glyoxylate
HUMANGEM_MAR07712	AMP <=> AMP
HUMANGEM_MAR07714	Adenosine <=> Adenosine
HUMANGEM_MAR07765	S-Adenosyl-L-methionine <=> S-Adenosyl-L-methionine
HUMANGEM_MAR07766	S-Adenosyl-L-methionine <=> S-Adenosyl-L-methionine
HUMANGEM_MAR07767	S-Adenosyl-L-homocysteine <=> S-Adenosyl-L-homocysteine
HUMANGEM_MAR07768	S-Adenosyl-L-homocysteine <=> S-Adenosyl-L-homocysteine
HUMANGEM_MAR07772	Nicotinamide adenine dinucleotide --> Nicotinamide adenine dinucleotide
HUMANGEM_MAR07773	Nicotinamide adenine dinucleotide <=> Nicotinamide adenine dinucleotide
HUMANGEM_MAR07776	Nicotinamide adenine dinucleotide - reduced --> Nicotinamide adenine dinucleotide - reduced
HUMANGEM_MAR07777	Nicotinamide adenine dinucleotide phosphate --> Nicotinamide adenine dinucleotide phosphate
HUMANGEM_MAR07779	Nicotinamide adenine dinucleotide phosphate - reduced --> Nicotinamide adenine dinucleotide phosphate - reduced
HUMANGEM_MAR07784	AMP <=> AMP
HUMANGEM_MAR07791	Flavin adenine dinucleotide oxidized --> Flavin adenine dinucleotide oxidized
HUMANGEM_MAR07799	ATP + Water + 3.0 proton --> ADP + 4.0 proton + hydrogenphosphate
HUMANGEM_MAR07859	dUMP <=> dUMP
HUMANGEM_MAR07860	dCTP <=> dCTP
HUMANGEM_MAR07861	dATP <=> dATP
HUMANGEM_MAR07899	dITP(4-) <=> dITP(4-)
HUMANGEM_MAR07953	3beta-hydroxyandrost-5-en-17-one <=> 3beta-hydroxyandrost-5-en-17-one
HUMANGEM_MAR07956	testosterone <=> testosterone
HUMANGEM_MAR08009	25-Hydroxyvitamin D3 <=> calcidiol
HUMANGEM_MAR08070	(S)-3-sulfonatolactate(2-) --> (S)-3-sulfonatolactate(2-)
HUMANGEM_MAR08093	3-methyl-2-oxopentanoate + proton --> 3-methyl-2-oxopentanoate + proton
HUMANGEM_MAR08099	4-methyl-2-oxopentanoate + proton --> 4-methyl-2-oxopentanoate + proton
HUMANGEM_MAR08125	heptaglutamyl folate (DHF) --> heptaglutamyl folate (DHF)
HUMANGEM_MAR08126	heptaglutamyl folate (DHF) --> heptaglutamyl folate (DHF)
HUMANGEM_MAR08234	sphingosine 1-phosphate(1-) <=> sphingosine 1-phosphate(1-)
HUMANGEM_MAR08236	sphingosine(1+) <=> sphingosine(1+)
HUMANGEM_MAR08239	(2S,3R)-2-azaniumyl-3-hydroxyoctadecyl phosphate <=> (2S,3R)-2-azaniumyl-3-hydroxyoctadecyl phosphate
HUMANGEM_MAR08241	sphingomyelin betaine <=> sphingomyelin betaine
HUMANGEM_MAR08243	choline phosphate(1-) <=> choline phosphate(1-)
HUMANGEM_MAR08244	choline phosphate(1-) <=> choline phosphate(1-)
HUMANGEM_MAR08247	sphingosylphosphorylcholine <=> sphingosylphosphorylcholine
HUMANGEM_MAR08347	L-gulono-1,4-lactone --> L-gulono-1,4-lactone
HUMANGEM_MAR08351	L-gulonate --> L-gulonate
HUMANGEM_MAR08355	proton <=> 4-Aminobutanoate + proton
HUMANGEM_MAR08358	acetaldehyde <=> acetaldehyde
HUMANGEM_MAR08428	creatine --> creatine
HUMANGEM_MAR08475	Deoxycytidine <=> Deoxycytidine
HUMANGEM_MAR08476	Deoxycytidine <=> Deoxycytidine
HUMANGEM_MAR08524	Choline <=> Choline
HUMANGEM_MAR08526	Choline <=> Choline
HUMANGEM_MAR08527	Phosphatidylethanolamine (gallus gallus) <=> phosphatidylethanolamine
HUMANGEM_MAR08588	Maltose <=> Maltose
HUMANGEM_MAR08590	maltotriose <=> maltotriose
HUMANGEM_MAR08651	Carbamoyl phosphate + hydrogenphosphate + Diphosphate <=> Carbamoyl phosphate + hydrogenphosphate + Diphosphate
HUMANGEM_MAR08657	Choline <=> Choline
HUMANGEM_MAR08688	proton <=> D-alanine + proton
HUMANGEM_MAR08737	sphinganine(1+) <=> sphinganine(1+)
HUMANGEM_MAR08754	Hypoxanthine --> Hypoxanthine
HUMANGEM_MAR08765	D-Galactose --> D-Galactose
HUMANGEM_MAR08785	imidazole-4-acetaldehyde <=> imidazole-4-acetaldehyde
HUMANGEM_MAR08789	NMN <=> NMN
HUMANGEM_MAR08793	adenosine 3,5-bismonophosphate(4-) --> adenosine 3,5-bismonophosphate(4-)
HUMANGEM_MAR08828	1-phosphatidyl-1D-myo-inositol(1-) <=> 1-phosphatidyl-1D-myo-inositol(1-)
HUMANGEM_MAR08839	myo-inositol 1,3,4,5,6-pentakisphosphate(10-) <=> myo-inositol 1,3,4,5,6-pentakisphosphate(10-)
HUMANGEM_MAR08841	(1R,2R,3R,4R,5R,6S)-2,3,5,6-tetrahydroxy-4-(phosphonatooxy)cyclohexyl phosphate <=> (1R,2R,3R,4R,5R,6S)-2,3,5,6-tetrahydroxy-4-(phosphonatooxy)cyclohexyl phosphate
HUMANGEM_MAR08856	UDP-D-galactose(2-) --> UDP-D-galactose(2-)
HUMANGEM_MAR08858	UDP <=> UDP
HUMANGEM_MAR08860	Urate --> Urate C5H4N4O3
HUMANGEM_MAR08862	Uridine <=> Uridine
HUMANGEM_MAR08875	L-fucose --> L-fucose
HUMANGEM_MAR08885	D-glucose --> D-glucose
HUMANGEM_MAR08887	D-glucuronate + proton <=> D-glucuronate + proton
HUMANGEM_MAR08891	Glycerol 3-phosphate --> Glycerol 3-phosphate
HUMANGEM_MAR08908	proton <=> proton + L-iduronate
HUMANGEM_MAR08910	Inosine <=> Inosine
HUMANGEM_MAR08914	leukotriene A4(1-) <=> leukotriene A4(1-)
HUMANGEM_MAR08919	D-Mannose --> D-Mannose
HUMANGEM_MAR08920	D-Mannose --> D-Mannose
HUMANGEM_MAR08922	2.0 ATP + 2.0 Water + 3.0 Metanephrine --> 2.0 ADP + 2.0 proton + 3.0 Metanephrine + 2.0 hydrogenphosphate
HUMANGEM_MAR08928	proton + D-proline <=> proton + D-proline
HUMANGEM_MAR09004	5-Methylthioadenosine <=> 5-Methylthioadenosine
HUMANGEM_MAR09008	anthranilate <=> anthranilate
HUMANGEM_MAR09017	Nicotinamide adenine dinucleotide phosphate - reduced --> Nicotinamide adenine dinucleotide phosphate - reduced
HUMANGEM_MAR09018	ADP --> ADP
HUMANGEM_MAR09179	D-ornithinium(1+) <=> D-ornithinium(1+)
HUMANGEM_MAR09181	D-argininium(1+) <=> D-argininium(1+)
HUMANGEM_MAR09192	Adrenaline <=> Adrenaline
HUMANGEM_MAR09194	Agmatine <=> agmatinium(2+)
HUMANGEM_MAR09199	Zinc --> Zinc
HUMANGEM_MAR09628	Oxidized glutathione <=> Oxidized glutathione
HUMANGEM_MAR09634	O-phosphonatoethanaminium(1-) <=> O-phosphonatoethanaminium(1-)
HUMANGEM_MAR09664	diglyceride --> diglyceride
HUMANGEM_MAR09672	R total --> R total
HUMANGEM_MAR09675	glycolate <=> glycolate
HUMANGEM_MAR09678	Hexadecanoate (n-C16:0) --> Hexadecanoate (n-C16:0)
HUMANGEM_MAR09725	Nicotinamide adenine dinucleotide phosphate + Nicotinamide adenine dinucleotide phosphate - reduced <=> Nicotinamide adenine dinucleotide phosphate + Nicotinamide adenine dinucleotide phosphate - reduced
HUMANGEM_MAR09736	3-hydroxy-L-kynurenine + L-tryptophan <=> 3-hydroxy-L-kynurenine + L-Tryptophan
HUMANGEM_MAR09762	arachidonate --> arachidonate
HUMANGEM_MAR09773	octadecenoate (n-C18:1) --> Octadecenoate (n-C18:1)
HUMANGEM_MAR09779	linoleate --> Linoleic acid (all cis C18:2) n-6
HUMANGEM_MAR09786	octadecenoate (n-C18:1) --> Octadecenoate (n-C18:1)
HUMANGEM_MAR09788	Hexadecanoate (n-C16:0) --> Hexadecanoate (n-C16:0)
HUMANGEM_MAR10006	biliverdin(2-) + Sodium <=> biliverdin(2-) + Sodium
HUMANGEM_MAR10039	R total <=> R total
HUMANGEM_MAR10386	ATP + Water + 5alpha-cholest-7-en-3beta-ol --> ADP + proton + 5alpha-cholest-7-en-3beta-ol + hydrogenphosphate
HUMANGEM_MAR10479	L-Normetanephrine <=> L-Normetanephrine
HUMANGEM_MAR11302	phosphatidate(2-) <=> phosphatidate(2-)
HUMANGEM_MAR11314	2.0 ATP + 2.0 Water + 3.0 L-Normetanephrine --> 2.0 ADP + 2.0 proton + 3.0 L-Normetanephrine + 2.0 hydrogenphosphate
HUMANGEM_MAR11363	phosphatidyl glycerol phosphate <=> phosphatidyl glycerol phosphate
HUMANGEM_MAR11366	prostaglandin E2(1-) <=> prostaglandin E2(1-)
HUMANGEM_MAR11370	5alpha-cholest-7-en-3beta-ol <=> 5alpha-cholest-7-en-3beta-ol
HUMANGEM_MAR11371	phosphatidylglycerol(1-) <=> phosphatidylglycerol(1-)
HUMANGEM_MAR11443	proton + keto-phenylpyruvate <=> proton + keto-phenylpyruvate
HUMANGEM_MAR11768	ATP + Water + pregnenolone --> ADP + proton + hydrogenphosphate + pregnenolone
HUMANGEM_MAR11788	proton + tyraminium <=> proton + tyraminium
HUMANGEM_MAR11812	(3,4-dihydroxyphenyl)acetate <=> (3,4-dihydroxyphenyl)acetate
HUMANGEM_MAR11845	5-guanidino-2-oxopentanoic acid <=> 5-guanidino-2-oxopentanoic acid
HUMANGEM_MAR11849	ATP + 3beta-hydroxyandrost-5-en-17-one + Water --> ADP + 3beta-hydroxyandrost-5-en-17-one + proton + hydrogenphosphate
HUMANGEM_MAR11980	5-amino-2-oxopentanoic acid <=> 5-amino-2-oxopentanoic acid
HUMANGEM_MAR12097	choline phosphate(1-) <=> choline phosphate(1-)
HUMANGEM_MAR12103	sphingosine(1+) <=> sphingosine(1+)
HUMANGEM_MAR12107	dihydroceramide --> dihydroceramide
HUMANGEM_MAR12108	dihydroceramide --> dihydroceramide
HUMANGEM_MAR12117	N-acylsphingosine <=> N-acylsphingosine
HUMANGEM_MAR12120	ADP + ATP --> ADP + ATP
HUMANGEM_MAR13002	Hydrogen peroxide <=> Hydrogen peroxide
HUMANGEM_MAR13075	dCMP <=> dCMP
HUMANGEM_MAR13076	D-glucurono-6,3-lactone <=> D-glucurono-6,3-lactone
HUMANGEM_MAR20136	CTP + dCMP <=> CTP + dCMP
HUMANGEM_MAR20139	CTP + GMP <=> CTP + GMP
HUMANGEM_MAR20145	CTP + IMP <=> CTP + IMP
HUMANGEM_MAR20146	CTP + UTP <=> CTP + UTP
HUMANGEM_MAR20147	CTP + UDP <=> CTP + UDP
HUMANGEM_MAR20148	CTP + UMP <=> CTP + UMP
HUMANGEM_MAR20181	Thiamin monophosphate + Thiamine diphosphate <=> Thiamin monophosphate + Thiamine diphosphate
