# Supplementary material
Source: Research Square preprint supplement (doi:10.21203/rs.3.rs-9275884/v1)
Supplement: Supplementary file 4 [file a49585215c9adca457eab52c.xlsx]

## Sheet: BM
Reaction ID	GPR rule (genes)	Transcript effect (log2FC)	Flux change log2(FG/SG)	Adjusted p-value (FDR)	Metabolic pathways	Subsystem	Concordant (transcript–flux)	Significant reaction (transcript effect & flux ratio)
ALATA__L	GPT2	2.3741	3	0	2-oxocarboxylic Acid Metabolism; Alanine, Aspartate And Glutamate Metabolism; Arginine Biosynthesis; Biosynthesis Of Amino Acids	2-oxocarboxylic Acid Metabolism; AA central (A/D/E,G/S/T); AA other (Cys/Met/Lys/Arg/Pro); Biosynthesis Of Amino Acids	True	True
CSm	CS	1.0112	3	0.0292	2-oxocarboxylic Acid Metabolism; Biosynthesis Of Amino Acids; Citric Acid Cycle; Glyoxylate And Dicarboxylate Metabolism	2-oxocarboxylic Acid Metabolism; Biosynthesis Of Amino Acids; Central Energy Metabolism; Glyoxylate And Dicarboxylate Metabolism	True	True
ECOAH1m	HADHA and ECHS1	-0.5208	-3	0.8782	Butanoate Metabolism; Fatty Acid Degradation; Fatty Acid Metabolism; Lysine Degradation; Tryptophan Metabolism	Butanoate Metabolism; Lipid metabolism; AA other (Cys/Met/Lys/Arg/Pro); AAA metabolism (Trp/Phe/Tyr)	True	True
GLNt4	SLC38A1 or SLC6A14 or SLC38A2 or SLC22A5 or (SLC6A19 and TMEM27) or (SLC6A19 and ACE2)	1.3991	3	0.6849	Extracellular Transport	Extracellular Transport	True	True
PDHm	DLAT	2.3375	3	0.0099	2-oxocarboxylic Acid Metabolism; Glycolysis/Gluconeogenesis	2-oxocarboxylic Acid Metabolism; Central Energy Metabolism	True	True
r0130	GGT2 or GGT2P	0.9771	3	0.1495	Glutathione Metabolism	Redox & Pentose Metabolism	True	True
CYSGLUexR	SLC7A10 or SLC7A5	1.146	1.3334	0.9888	Extracellular Transport	Extracellular Transport	True	True
r0129	GGT2 or GGT2P	0.9771	0.84	0.1495	Glutathione Metabolism	Redox & Pentose Metabolism	True	True
BTNt2	SLC16A1	0.5596	-5.6439	0.1147	Extracellular Transport	Extracellular Transport	False	True
GLUDxm	GLUD2	2.4688	-3	0.0009	Alanine, Aspartate And Glutamate Metabolism; Arginine Biosynthesis; Nitrogen Metabolism; Taurine And Hypotaurine Metabolism	AA central (A/D/E,G/S/T); AA other (Cys/Met/Lys/Arg/Pro); Nitrogen disposal; Taurine And Hypotaurine Metabolism	False	True
LYStm	SLC25A15	0.8802	-3	0.0743	Transport, Mitochondrial	Mitochondrial transport	False	True
r0541	GCDH	0.5482	-3	0.2005	Tryptophan Metabolism	AAA metabolism (Trp/Phe/Tyr)	False	True
MTHFCm	MTHFD1L or MTHFD2	0.5499	-0.737	0.3051	Folate Metabolism	Folate Metabolism	False	True
PSERT	PSAT1	0.8412	-0.737	0.0101	Alanine, Aspartate And Glutamate Metabolism; Biosynthesis Of Amino Acids; Cysteine And Methionine Metabolism; Glycine, Serine And Threonine Metabolism; Methane Metabolism	AA central (A/D/E,G/S/T); Biosynthesis Of Amino Acids; AA other (Cys/Met/Lys/Arg/Pro); Methane Metabolism	False	True
ME2m	ME1 or ME3	0.0308	3.1359	0.8057	Pyruvate Metabolism	Central Energy Metabolism	True	False
ACACT1rm	ACAT1	0.1256	3	0.528	Butanoate Metabolism; Fatty Acid Degradation; Fatty Acid Metabolism; Glyoxylate And Dicarboxylate Metabolism; Lysine Degradation; Pyruvate Metabolism; Terpenoid Backbone Biosynthesis; Tryptophan Metabolism; Valine, Leucine And Isoleucine Degradation	Butanoate Metabolism; Lipid metabolism; Glyoxylate And Dicarboxylate Metabolism; AA other (Cys/Met/Lys/Arg/Pro); Central Energy Metabolism; Terpenoid Backbone Biosynthesis; AAA metabolism (Trp/Phe/Tyr); BCAA metabolism (Val/Leu/Iso)	True	False
ARGLYSex	SLC7A6	0.2933	3	0.509	Extracellular Transport	Extracellular Transport	True	False
ASNtN1	SLC38A3	0.1033	3	0.8364	Extracellular Transport	Extracellular Transport	True	False
r0450	AADAT	-0.0115	-3	0.9879	2-oxocarboxylic Acid Metabolism; Biosynthesis Of Amino Acids; Lysine Biosynthesis; Lysine Degradation; Lysine Metabolism	2-oxocarboxylic Acid Metabolism; Biosynthesis Of Amino Acids; Lysine Biosynthesis; AA other (Cys/Met/Lys/Arg/Pro)	True	False
GCC2am	AMT and DLD and GLDC and GCSH	-0.0856	-0.737	0.7551	Alanine, Aspartate And Glutamate Metabolism; Glycine, Serine And Threonine Metabolism	AA central (A/D/E,G/S/T)	True	False
GCC2bim	AMT and DLD and GLDC and GCSH	-0.0856	-0.737	0.7551	Alanine, Aspartate And Glutamate Metabolism; Glycine, Serine And Threonine Metabolism	AA central (A/D/E,G/S/T)	True	False
PGCD	PHGDH	-0.3278	-0.737	0.5944	Alanine, Aspartate And Glutamate Metabolism; Biosynthesis Of Amino Acids; Cysteine And Methionine Metabolism; Glycine, Serine And Threonine Metabolism; Methane Metabolism	AA central (A/D/E,G/S/T); Biosynthesis Of Amino Acids; AA other (Cys/Met/Lys/Arg/Pro); Methane Metabolism	True	False
PSP__Lm	PSPH	-0.0841	-0.737	0.9307	Alanine, Aspartate And Glutamate Metabolism; Glycine, Serine And Threonine Metabolism	AA central (A/D/E,G/S/T)	True	False
FUMm	FH	0.4581	0.696	0.097	Citric Acid Cycle; Pyruvate Metabolism	Central Energy Metabolism	True	False
SUCOASm	SUCLG1 and SUCLA2	0.0517	0.696	0.8844	Citric Acid Cycle; Propanoate Metabolism	Central Energy Metabolism; Propanoate Metabolism	True	False
GCC2cm	DLD	-0.0856	-0.6897	0.7551	Glycolysis/Gluconeogenesis	Central Energy Metabolism	True	False
r1418	CA15L or CA9	0.2457	0.4854	0.8343	Nitrogen Metabolism	Nitrogen disposal	True	False
GLUt4	SLC38A3	0.1033	0.263	0.8364	Extracellular Transport	Extracellular Transport	True	False
CYOOm3	COX5B and COX4I1 and COX6A1 and COX6C and COX7A2L and COX7C and COX5A and COX7B and COX7A2 and COX8A and COX2 and COX3 and COX1	-0.6969	-0.074		Oxidative Phosphorylation	Oxidative Phosphorylation	True	False
CYOR_u10m	UQCRFS1 and UQCRC1 and UQCRQ and UQCRB and UQCRC2 and UQCR11 and UQCR10 and UQCRHL and CYTB	-0.4791	-0.074		Oxidative Phosphorylation	Oxidative Phosphorylation	True	False
ATPS4m	NDUFS2 and NDUFA13 and NDUFB7 and NDUFS4 and NDUFC2 and NDUFB6 and NDUFB10 and NDUFAB1 and NDUFA8 and NDUFA5 and NDUFA12 and NDUFB2 and NDUFV3 and NDUFA9 and NDUFA7 and NDUFB9 and NDUFS6 and NDUFS3 and NDUFB1 and NDUFB8 and NDUFA10 and NDUFB3 and NDUFS1 and NDUFB5 and NDUFV2 and NDUFA6 and NDUFV1 and NDUFA2 and NDUFS8 and NDUFB4 and NDUFS7 and NDUFS5 and NDUFA4 and NDUFA1 and NDUFA11 and ND1 and …	-0.707	-0.0589		Oxidative Phosphorylation	Oxidative Phosphorylation	True	False
ENO	ENO1 or ENO4 or ENO2	0.8543	0.0566	0.0016	Biosynthesis Of Amino Acids; Glycolysis/Gluconeogenesis; Methane Metabolism	Biosynthesis Of Amino Acids; Central Energy Metabolism; Methane Metabolism	True	False
PYK	PKLR	0.1968	0.0566	0.487	Biosynthesis Of Amino Acids; Glycolysis/Gluconeogenesis; Pyruvate Metabolism	Biosynthesis Of Amino Acids; Central Energy Metabolism	True	False
ATPtm	SLC25A4 or SLC25A6 or SLC25A5	-0.0191	-0.0439	0.0049	Transport, Mitochondrial	Mitochondrial transport	True	False
r0276	GMPR2	-0.029	-0.0439	0.9622	Nucleotide Metabolism; Purine Catabolism; Purine Metabolism	Nucleotide metabolism; Purine Catabolism; Nitrogen disposal	True	False
AKGMALtm	SLC25A11 or SLC25A10	0.3232	0.0426	0.5539	Transport, Mitochondrial	Mitochondrial transport	True	False
GLUt2m	SLC25A12 or SLC25A22 or SLC25A13	0.6577	0.0426	0.0903	Transport, Mitochondrial	Mitochondrial transport	True	False
r0202c	GPD1L2	0.3552	-6.6439	0.62	Glycerophospholipid Metabolism	Lipid metabolism	False	False
BTNt4i	SLC19A3	0	-5.6439		Extracellular Transport	Extracellular Transport	False	False
ACONTm	ACO2 or ACO1	-0.0206	3	0.8579	2-oxocarboxylic Acid Metabolism; Biosynthesis Of Amino Acids; Citric Acid Cycle	2-oxocarboxylic Acid Metabolism; Biosynthesis Of Amino Acids; Central Energy Metabolism	False	False
HACD1m	XRN1 or HADH	0.1318	-3	0.8734	Butanoate Metabolism; Fatty Acid Degradation; Fatty Acid Metabolism; Lysine Degradation; Tryptophan Metabolism	Butanoate Metabolism; Lipid metabolism; AA other (Cys/Met/Lys/Arg/Pro); AAA metabolism (Trp/Phe/Tyr)	False	False
ICDHxm	IDH3B and IDH3A	-0.2924	3	0.8253	2-oxocarboxylic Acid Metabolism; Biosynthesis Of Amino Acids; Citric Acid Cycle	2-oxocarboxylic Acid Metabolism; Biosynthesis Of Amino Acids; Central Energy Metabolism	False	False
SACCD3m	AASS	0.2022	-3	0.5383	Lysine Degradation; Lysine Metabolism	AA other (Cys/Met/Lys/Arg/Pro)	False	False
r0525	AASS	0.2022	-3	0.5383	Lysine Degradation; Lysine Metabolism	AA other (Cys/Met/Lys/Arg/Pro)	False	False
r0594m	ALDH7A1	0.0239	-3	0.9319	Lysine Metabolism	AA other (Cys/Met/Lys/Arg/Pro)	False	False
PCm	PC	0	1.7782		Biosynthesis Of Amino Acids; Citric Acid Cycle; Pyruvate Metabolism	Biosynthesis Of Amino Acids; Central Energy Metabolism	False	False
MDH	MDH2 or MDH1	0.1691	-1.5564	0.7134	Citric Acid Cycle; Glyoxylate And Dicarboxylate Metabolism; Methane Metabolism; Pyruvate Metabolism	Central Energy Metabolism; Glyoxylate And Dicarboxylate Metabolism; Methane Metabolism	False	False
r1418m	CA5A	-0.0957	0.8953	0.9059	Nitrogen Metabolism	Nitrogen disposal	False	False
AMPTASECG	LAP3	-0.244	0.84	0.4862	Glutathione Metabolism	Redox & Pentose Metabolism	False	False
AKGDm	OGDH and DLD and PDHX and DLST	-0.0856	0.7485	0.9748	2-oxocarboxylic Acid Metabolism; Citric Acid Cycle	2-oxocarboxylic Acid Metabolism; Central Energy Metabolism	False	False
FTHFDHm	ALDH1L2	0.0665	-0.737	0.9102	Folate Metabolism	Folate Metabolism	False	False
GHMT2rm	SHMT1	0	-0.737		Alanine, Aspartate And Glutamate Metabolism; Biosynthesis Of Amino Acids; Cyanoamino Acid Metabolism; Folate Metabolism; Glycine, Serine And Threonine Metabolism; Glyoxylate And Dicarboxylate Metabolism; Methane Metabolism	AA central (A/D/E,G/S/T); Biosynthesis Of Amino Acids; Cyanoamino Acid Metabolism; Folate Metabolism; Glyoxylate And Dicarboxylate Metabolism; Methane Metabolism	False	False
r0509	SDHA and SDHB and SDHC and SDHD	-0.0623	0.696	0.8957	Citric Acid Cycle	Central Energy Metabolism	False	False
GLNtN1	SLC38A3	0.1033	-0.2863	0.8364	Extracellular Transport	Extracellular Transport	False	False
2HCO3_NAt	SLC4A5 or SLC4A4 or SLC4A9	0	-0.2009	0.7836	Extracellular Transport	Extracellular Transport	False	False
r1418c	CA13 or CA4 or CA3A or CA3B or CA8 or LOC421187	0.6438	-0.2009	0.6003	Nitrogen Metabolism	Nitrogen disposal	False	False
H2Otm	AQP8	0	-0.074		Transport, Mitochondrial	Mitochondrial transport	False	False
LDH__L	LDHB and LDHA	-0.0438	0.0566	0.9079	Pyruvate Metabolism	Central Energy Metabolism	False	False
NADH2_u10m	NDUFS2 and NDUFA13 and NDUFB7 and NDUFS4 and NDUFC2 and NDUFB6 and NDUFB10 and NDUFAB1 and NDUFA8 and NDUFA5 and NDUFA12 and NDUFB2 and NDUFV3 and NDUFA9 and NDUFA7 and NDUFB9 and NDUFS6 and NDUFS3 and NDUFB1 and NDUFB8 and NDUFA10 and NDUFB3 and NDUFS1 and NDUFB5 and NDUFV2 and NDUFA6 and NDUFV1 and NDUFA2 and NDUFS8 and NDUFB4 and NDUFS7 and NDUFS5 and NDUFA4 and NDUFA1 and NDUFA11 and ND1 and …	-0.707	0.0566		Oxidative Phosphorylation	Oxidative Phosphorylation	False	False
PGM	BPGM or PGAM1	-0.1929	0.0566	0.417	Biosynthesis Of Amino Acids; Glycine, Serine And Threonine Metabolism; Glycolysis/Gluconeogenesis; Methane Metabolism	Biosynthesis Of Amino Acids; AA central (A/D/E,G/S/T); Central Energy Metabolism; Methane Metabolism	False	False
GMPR	ARMC4	0	-0.0439		Nucleotide Interconversion; Nucleotide Metabolism; Purine Metabolism	Nucleotide metabolism; Nitrogen disposal	False	False
HUMANGEM_MAR20139	SLC25A36	0.4366	-0.0439	0.0947	Transport, Mitochondrial	Mitochondrial transport	False	False
HUMANGEM_MAR20145	SLC25A36	0.4366	-0.0439	0.0947	Transport, Mitochondrial	Mitochondrial transport	False	False
r0552	ALDH7A1	0.0239	-0.0291	0.9319	Alanine, Aspartate And Glutamate Metabolism; Folate Metabolism; Glycine, Serine And Threonine Metabolism	AA central (A/D/E,G/S/T); Folate Metabolism	False	False
r0552m	ALDH7A1	0.0239	-0.0291	0.9319	Alanine, Aspartate And Glutamate Metabolism; Glycine, Serine And Threonine Metabolism	AA central (A/D/E,G/S/T)	False	False
r0553	ALDH7A1	0.0239	-0.0291	0.9319	Alanine, Aspartate And Glutamate Metabolism; Folate Metabolism; Glycine, Serine And Threonine Metabolism	AA central (A/D/E,G/S/T); Folate Metabolism	False	False
r0553m	ALDH7A1	0.0239	-0.0291	0.9319	Alanine, Aspartate And Glutamate Metabolism; Glycine, Serine And Threonine Metabolism	AA central (A/D/E,G/S/T)	False	False
3DSPHR	KDSR	0.2778	0	0.4862	Sphingolipid Metabolism	Lipid metabolism	False	False
3HBCOAHLm	HIBCH	0.361	0	0.3394	Valine, Leucine And Isoleucine Biosynthesis; Valine, Leucine And Isoleucine Degradation	BCAA metabolism (Val/Leu/Iso)	False	False
3HKYNAKGAT	KYAT3	0.2155	0	0.5516	Tryptophan Metabolism	AAA metabolism (Trp/Phe/Tyr)	False	False
AACOAT	AACS	-0.3436	0	0.3825	Butanoate Metabolism; Valine, Leucine And Isoleucine Degradation	Butanoate Metabolism; BCAA metabolism (Val/Leu/Iso)	False	False
ACACT10m	ACAT1 or ACAA2	0.1953	0	0.5745	Valine, Leucine And Isoleucine Biosynthesis; Valine, Leucine And Isoleucine Degradation	BCAA metabolism (Val/Leu/Iso)	False	False
ACACT1r	ACAT2	-0.3332	0	0.5869	Butanoate Metabolism; Fatty Acid Degradation; Fatty Acid Metabolism; Glyoxylate And Dicarboxylate Metabolism; Lysine Degradation; Pyruvate Metabolism; Terpenoid Backbone Biosynthesis; Tryptophan Metabolism; Valine, Leucine And Isoleucine Degradation	Butanoate Metabolism; Lipid metabolism; Glyoxylate And Dicarboxylate Metabolism; AA other (Cys/Met/Lys/Arg/Pro); Central Energy Metabolism; Terpenoid Backbone Biosynthesis; AAA metabolism (Trp/Phe/Tyr); BCAA metabolism (Val/Leu/Iso)	False	False
ACCOACm	369504 or ACACB	0	0	0.8887	Fatty Acid Biosynthesis; Fatty Acid Degradation; Fatty Acid Metabolism; Propanoate Metabolism; Pyruvate Metabolism	Lipid metabolism; Propanoate Metabolism; Central Energy Metabolism	False	False
ADK1	AK1 or AK7 or AK8 or AK5	0.8841	0	0.4984	Nucleotide Interconversion; Nucleotide Metabolism; Purine Metabolism	Nucleotide metabolism; Nitrogen disposal	False	False
ADKd	AK5	0.8841	0	0.3986	Nucleotide Interconversion	Nucleotide metabolism	False	False
ADSL1	ADSL	-0.2552	0	0.5072	Alanine, Aspartate And Glutamate Metabolism; Nucleotide Interconversion; Nucleotide Metabolism; Purine Metabolism	AA central (A/D/E,G/S/T); Nucleotide metabolism; Nitrogen disposal	False	False
ADSL2	ADSL	-0.2552	0	0.5072	Purine Metabolism; Purine Synthesis	Nitrogen disposal; Nucleotide metabolism	False	False
ADSS	ADSS2 or ADSS1	0.5617	0	0.1332	Alanine, Aspartate And Glutamate Metabolism; Nucleotide Interconversion; Nucleotide Metabolism; Purine Metabolism	AA central (A/D/E,G/S/T); Nucleotide metabolism; Nitrogen disposal	False	False
AGPAT1	AGPAT2 or GPAT4 or AGPAT4 or AGPAT3 or AGPAT5 or AGPAT1 or MBOAT2	0.4419	0	0.3067	Triacylglycerol Synthesis	Lipid metabolism	False	False
AICART	ATIC	-0.0827	0	0.9343	Folate Metabolism; Purine Metabolism; Purine Synthesis	Folate Metabolism; Nitrogen disposal; Nucleotide metabolism	False	False
AIRCr	PAICS	0.1133	0	0.7817	Purine Metabolism; Purine Synthesis	Nitrogen disposal; Nucleotide metabolism	False	False
ASPCTr	CAD	0	0		Alanine, Aspartate And Glutamate Metabolism; Pyrimidine Metabolism; Pyrimidine Synthesis	AA central (A/D/E,G/S/T); Nucleotide metabolism	False	False
ASPTA	GOT1 or IL4I1	0.1389	0	0.7085	2-oxocarboxylic Acid Metabolism; Alanine, Aspartate And Glutamate Metabolism; Arginine Biosynthesis; Biosynthesis Of Amino Acids	2-oxocarboxylic Acid Metabolism; AA central (A/D/E,G/S/T); AA other (Cys/Met/Lys/Arg/Pro); Biosynthesis Of Amino Acids	False	False
CDS	CDS1 or CDS2	3.9374	0	0.0026	Glycerophospholipid Metabolism	Lipid metabolism	False	False
CEPTC	CEPT1 or CHPT1	0.0442	0	0.278	Glycerophospholipid Metabolism	Lipid metabolism	False	False
CHLPCTD	PCYT1A or PCYT1B	-0.0512	0	0.8965	Glycerophospholipid Metabolism	Lipid metabolism	False	False
CHOLESTle	LIPA	-0.324	0	0.3543	Extracellular Transport	Extracellular Transport	False	False
CHOLK	CHKA	0.124	0	0.9128	Glycerophospholipid Metabolism	Lipid metabolism	False	False
CHOLtu	LOC421583 or SLC22A1 or SLC22A5	0.3279	0	0.7972	Extracellular Transport	Extracellular Transport	False	False
CLSm_hs	CRLS1	0.2146	0	0.8017	Glycerophospholipid Metabolism	Lipid metabolism	False	False
COAtim	SLC25A16	0.6851	0	0.3137	Transport, Mitochondrial	Mitochondrial transport	False	False
CTPS2	CTPS1 or CTPS2	0.0779	0	0.9106	Nucleotide Metabolism; Pyrimidine Metabolism; Pyrimidine Synthesis	Nucleotide metabolism	False	False
CYTDK1	UCK2 or UCK1	0.5193	0	0.2832	Nucleotide Interconversion; Nucleotide Metabolism; Pyrimidine Metabolism	Nucleotide metabolism	False	False
CYTDe	CDA	-0.21	0	0.7264	Pyrimidine Catabolism	Nucleotide metabolism	False	False
CYTDt	SLC29A1 or SLC29A3	0.0092	0	0.9801	Extracellular Transport	Extracellular Transport	False	False
CYTK1	CMPK1	-0.3909	0	0.1232	Nucleotide Interconversion; Nucleotide Metabolism; Pyrimidine Metabolism	Nucleotide metabolism	False	False
CYTK12	CMPK1	-0.3909	0	0.1232	Nucleotide Interconversion	Nucleotide metabolism	False	False
CYTK1m	CMPK2	0	0		Nucleotide Interconversion; Nucleotide Metabolism; Pyrimidine Metabolism	Nucleotide metabolism	False	False
DAGK_hs	DGKI or DGKZ or DGKD or DGKH or DGKE or DGKQ or DGKK or DGKE or DGKI	0.6348	0	0.1301	Glycerophospholipid Metabolism	Lipid metabolism	False	False
DCMPDA	DCTD	-0.3744	0	0.8209	Pyrimidine Catabolism	Nucleotide metabolism	False	False
DGAT	DGAT2	-0.1544	0	0.8364	Triacylglycerol Synthesis	Lipid metabolism	False	False
DGK1	GUK1	0.1523	0	0.8313	Nucleotide Interconversion	Nucleotide metabolism	False	False
DHORD9	DHODH	-0.4527	0	0.6019	Transport, Mitochondrial	Mitochondrial transport	False	False
DHORTS	CAD	0	0		Pyrimidine Synthesis	Nucleotide metabolism	False	False
DNDPt14m	SLC25A19	0.168	0	0.6711	Transport, Mitochondrial	Mitochondrial transport	False	False
DURIK1	TK1	-0.193	0	0.8968	Nucleotide Interconversion	Nucleotide metabolism	False	False
DURIPP	PNP or UPP2	0.2162	0	0.8674	Nucleotide Interconversion	Nucleotide metabolism	False	False
DUTPDPm	DUT or ITPA	0.221	0	0.7706	Nucleotide Interconversion	Nucleotide metabolism	False	False
ECOAH12m	HADHA and EHHADH and ECHS1	-0.5208	0	0.8782	Valine, Leucine And Isoleucine Biosynthesis; Valine, Leucine And Isoleucine Degradation	BCAA metabolism (Val/Leu/Iso)	False	False
ECOAH9m	HADHA and EHHADH and ECHS1	-0.5208	0	0.8782	Valine, Leucine And Isoleucine Biosynthesis; Valine, Leucine And Isoleucine Degradation	BCAA metabolism (Val/Leu/Iso)	False	False
FAS100COA	FASN or (FASN and ELOVL6 and ELOVL5 and ELOVL2)	0.8865	0	0.1686	Fatty Acid Biosynthesis	Lipid metabolism	False	False
FAS120COA	FASN or (FASN and ELOVL6 and ELOVL5 and ELOVL2)	0.8865	0	0.1686	Fatty Acid Biosynthesis	Lipid metabolism	False	False
FAS140COA	FASN or (FASN and ELOVL6 and ELOVL5 and ELOVL2)	0.8865	0	0.1686	Fatty Acid Biosynthesis	Lipid metabolism	False	False
FAS160COA	FASN or (FASN and ELOVL6 and ELOVL5 and ELOVL2)	0.8865	0	0.1686	Fatty Acid Biosynthesis	Lipid metabolism	False	False
FAS80COA__L	FASN	0.8865	0	0.0935	Fatty Acid Biosynthesis	Lipid metabolism	False	False
FBA	ALDOC or ALDOB	0.6713	0	0.2717	Pentose Phosphate Pathway	Redox & Pentose Metabolism	False	False
FKYNH	AFMID	0.2553	0	0.6947	Tryptophan Metabolism	AAA metabolism (Trp/Phe/Tyr)	False	False
FTHFL	MTHFD1	0.3834	0	0.4162	Folate Metabolism	Folate Metabolism	False	False
FUM	FH	0.4581	0	0.097	Citric Acid Cycle; Pyruvate Metabolism	Central Energy Metabolism	False	False
G6PDH2r	IDH1 or PGD	0.0198	0	0.3712	Pentose Phosphate Pathway	Redox & Pentose Metabolism	False	False
GALU	UGP2	-0.1824	0	0.7519	Pentose And Glucuronate Interconversions	Redox & Pentose Metabolism	False	False
GAPD	GAPDH	0.0433	0	0.9185	Glycolysis/Gluconeogenesis	Central Energy Metabolism	False	False
GARFT	GART or GART-B	0.0222	0	0.9734	Folate Metabolism; Purine Metabolism; Purine Synthesis	Folate Metabolism; Nitrogen disposal; Nucleotide metabolism	False	False
GK1	GUK1	0.1523	0	0.8313	Nucleotide Interconversion; Nucleotide Metabolism; Purine Metabolism	Nucleotide metabolism; Nitrogen disposal	False	False
GLCt1	SLC2A11 or SLC2A9 or SLC2A9L or SLC2A12 or SLC2A1 or SLC2A6 or SLC2A8 or SLC2A2 or SLC2A10	1.6571	0	0.2215	Extracellular Transport	Extracellular Transport	False	False
GLUNm	GLS2	2.4952	0	0	Alanine, Aspartate And Glutamate Metabolism; Arginine Biosynthesis	AA central (A/D/E,G/S/T); AA other (Cys/Met/Lys/Arg/Pro)	False	False
GLUPRT	PPAT	0	0		Alanine, Aspartate And Glutamate Metabolism; Purine Metabolism; Purine Synthesis	AA central (A/D/E,G/S/T); Nitrogen disposal; Nucleotide metabolism	False	False
GND	PGD	-0.4726	0	0.2295	Glutathione Metabolism; Pentose Phosphate Pathway	Redox & Pentose Metabolism	False	False
GPAM_hs	AGPAT5L	0	0		Triacylglycerol Synthesis	Lipid metabolism	False	False
GUAPRT	HPRT1 or LOC769866 or APRT	0.0985	0	0.1284	Nucleotide Metabolism; Nucleotide Salvage Pathway; Purine Metabolism	Nucleotide metabolism; Nucleotide Salvage Pathway; Nitrogen disposal	False	False
HACD9m	HSD17B10 or EHHADH or HADH	0.5018	0	0.1618	Valine, Leucine And Isoleucine Biosynthesis; Valine, Leucine And Isoleucine Degradation	BCAA metabolism (Val/Leu/Iso)	False	False
HEX1	ADPGK or HK2 or HK1 or HK3 or GCK or ADPGK	0.1881	0	0.2346	Glycolysis/Gluconeogenesis; Starch And Sucrose Metabolism	Central Energy Metabolism; Starch And Sucrose Metabolism	False	False
HIBDm	HIBADH or EHHADH or HADH	0.5018	0	0.3566	Valine, Leucine And Isoleucine Biosynthesis	BCAA metabolism (Val/Leu/Iso)	False	False
HIStN1	SLC38A3	0.1033	0	0.8364	Extracellular Transport	Extracellular Transport	False	False
HMGCOASim	HMGCS2	0.8584	0	0.1404	Butanoate Metabolism; Synthesis And Degradation Of Ketone Bodies; Terpenoid Backbone Biosynthesis; Valine, Leucine And Isoleucine Degradation	Butanoate Metabolism; Lipid metabolism; Terpenoid Backbone Biosynthesis; BCAA metabolism (Val/Leu/Iso)	False	False
HMGLm	HMGCL or HMGCLL1	1.1683	0	0.3851	Butanoate Metabolism; Cholesterol Metabolism; Valine, Leucine And Isoleucine Degradation	Butanoate Metabolism; Lipid metabolism; BCAA metabolism (Val/Leu/Iso)	False	False
HUMANGEM_MAR05036	SLC29A1	0.0092	0	0.9832	Transport, Mitochondrial	Mitochondrial transport	False	False
HUMANGEM_MAR11443	MPC1 and MPC2	0	0		Transport, Mitochondrial	Mitochondrial transport	False	False
HUMANGEM_MAR20147	SLC25A36	0.4366	0	0.0947	Transport, Mitochondrial	Mitochondrial transport	False	False
HUMANGEM_MAR20148	SLC25A36	0.4366	0	0.0947	Transport, Mitochondrial	Mitochondrial transport	False	False
ILETA	BCAT1 or IL4I1	0.0468	0	0.9379	2-oxocarboxylic Acid Metabolism; Biosynthesis Of Amino Acids; Valine, Leucine And Isoleucine Biosynthesis; Valine, Leucine And Isoleucine Degradation	2-oxocarboxylic Acid Metabolism; Biosynthesis Of Amino Acids; BCAA metabolism (Val/Leu/Iso)	False	False
ILEtec	SLC43A2	0.0198	0	0.9875	Extracellular Transport	Extracellular Transport	False	False
IMPC	ATIC	-0.0827	0	0.9343	Purine Metabolism; Purine Synthesis	Nitrogen disposal; Nucleotide metabolism	False	False
INSTt2	SLC2A13	0	0		Extracellular Transport	Extracellular Transport	False	False
KYN3OX	KMO	-0.0201	0	0.9875	Tryptophan Metabolism	AAA metabolism (Trp/Phe/Tyr)	False	False
LPASE	PLA2G4A	0.4417	0	0.6537	Glycerophospholipid Metabolism	Lipid metabolism	False	False
MALtm	SLC25A10	0.3232	0	0.5539	Transport, Mitochondrial	Mitochondrial transport	False	False
METtec	SLC43A2	0.0198	0	0.9875	Extracellular Transport	Extracellular Transport	False	False
MMEm	MCEE	-0.0534	0	0.9489	Glyoxylate And Dicarboxylate Metabolism; Propanoate Metabolism; Valine, Leucine And Isoleucine Biosynthesis; Valine, Leucine And Isoleucine Degradation	Glyoxylate And Dicarboxylate Metabolism; Propanoate Metabolism; BCAA metabolism (Val/Leu/Iso)	False	False
MMMm	MUT	-0.2582	0	0.3144	Glyoxylate And Dicarboxylate Metabolism; Propanoate Metabolism; Valine, Leucine And Isoleucine Biosynthesis; Valine, Leucine And Isoleucine Degradation	Glyoxylate And Dicarboxylate Metabolism; Propanoate Metabolism; BCAA metabolism (Val/Leu/Iso)	False	False
MMSAD1m	ALDH6A1	0.5176	0	0.0466	Valine, Leucine And Isoleucine Biosynthesis; Valine, Leucine And Isoleucine Degradation	BCAA metabolism (Val/Leu/Iso)	False	False
NDPK1	NME3 or NME2 or NME6 or NME7 or (NME2 and NME1) or PKLR	0.1968	0	0.4675	Nucleotide Interconversion; Nucleotide Metabolism; Purine Metabolism	Nucleotide metabolism; Nitrogen disposal	False	False
NDPK10	NME3 or NME2 or NME6 or NME7 or (NME2 and NME1)	-0.0614	0	0.4638	Nucleotide Interconversion; Nucleotide Metabolism; Purine Metabolism	Nucleotide metabolism; Nitrogen disposal	False	False
NDPK10n	NME2 and NME1	-0.1751	0	0.9095	Nucleotide Interconversion; Nucleotide Metabolism; Purine Metabolism	Nucleotide metabolism; Nitrogen disposal	False	False
NDPK3m	NME4 or NME6 or NME1	0.1727	0	0.7667	Nucleotide Interconversion; Nucleotide Metabolism; Pyrimidine Metabolism	Nucleotide metabolism	False	False
NDPK4n	NT5C2 or NT5C1B or NT5C1A or LOC770392 or NT5C3B or NT5DC4 or NT5C3A	1.8809	0	0.0107	Nucleotide Interconversion; Nucleotide Metabolism; Pyrimidine Metabolism	Nucleotide metabolism	False	False
NDPK5	NME3 or (NME2 and NME1) or NME6 or NME7 or NME2	-0.0614	0	0.4638	Nucleotide Interconversion; Nucleotide Metabolism; Purine Metabolism	Nucleotide metabolism; Nitrogen disposal	False	False
NDPK6m	NME1 and NME2	-0.1751	0	0.9095	Nucleotide Interconversion; Nucleotide Metabolism; Pyrimidine Metabolism	Nucleotide metabolism	False	False
NDPK8	NME3 or NME2 or NME6 or NME7 or (NME2 and NME1) or PKLR	0.1968	0	0.4675	Nucleotide Interconversion; Nucleotide Metabolism; Purine Metabolism	Nucleotide metabolism; Nitrogen disposal	False	False
NDPK8m	NME4 or NME6 or NME1	0.1727	0	0.7667	Nucleotide Interconversion; Nucleotide Metabolism; Purine Metabolism	Nucleotide metabolism; Nitrogen disposal	False	False
NTD2	NT5C2 or NT5C1B or NT5C1A or LOC770392 or NT5C3B or NT5DC4	1.8809	0	0.0092	Nucleotide Metabolism; Pyrimidine Catabolism; Pyrimidine Metabolism	Nucleotide metabolism	False	False
NTD7	NT5C2 or NT5C1B or NT5C1A or LOC770392 or NT5C3B or NT5DC4	1.8809	0	0.0092	Nucleotide Interconversion; Nucleotide Metabolism; Purine Metabolism	Nucleotide metabolism; Nitrogen disposal	False	False
NTD8	NT5C2 or NT5C1B or NT5C1A or LOC770392 or NT5C3B or NT5DC4	1.8809	0	0.0092	Nucleotide Interconversion; Nucleotide Metabolism; Purine Metabolism	Nucleotide metabolism; Nitrogen disposal	False	False
NTD9m	NT5M	0.1795	0	0.7043	Nucleotide Interconversion	Nucleotide metabolism	False	False
OMPDC	UMPS	-0.5783	0	0.0847	Pyrimidine Metabolism; Pyrimidine Synthesis	Nucleotide metabolism	False	False
ORPT	UMPS	-0.5783	0	0.0847	Pyrimidine Metabolism; Pyrimidine Synthesis	Nucleotide metabolism	False	False
PCt	ABCB1LA or ABCA1	1.3733	0	0.4997	Extracellular Transport	Extracellular Transport	False	False
PFK	PFKP or (PFKP and PFKL) or (PFKP and PFKM) or PFKM or PFKL or (PFKL and PFKM)	1.1113	0	0.026	Glycolysis/Gluconeogenesis	Central Energy Metabolism	False	False
PGI	GPI	0.1737	0	0.6627	Glycolysis/Gluconeogenesis	Central Energy Metabolism	False	False
PGK	PGK2	0.5523	0	0.0759	Biosynthesis Of Amino Acids; Glycolysis/Gluconeogenesis	Biosynthesis Of Amino Acids; Central Energy Metabolism	False	False
PGL	H6PD	-0.1763	0	0.7725	Pentose Phosphate Pathway	Redox & Pentose Metabolism	False	False
PGMT	PGM1 or PGM2	0.6959	0	0.1658	Glycolysis/Gluconeogenesis	Central Energy Metabolism	False	False
PGPPTm	PGS1	0.3589	0	0.532	Glycerophospholipid Metabolism	Lipid metabolism	False	False
PHETA1	GOT1	0.1389	0	0.7085	2-oxocarboxylic Acid Metabolism; Biosynthesis Of Amino Acids; Phenylalanine Metabolism; Phenylalanine, Tyrosine And Tryptophan Biosynthesis	2-oxocarboxylic Acid Metabolism; Biosynthesis Of Amino Acids; AAA metabolism (Trp/Phe/Tyr)	False	False
PHETA1m	TAT or GOT2	0.7096	0	0.4178	2-oxocarboxylic Acid Metabolism; Biosynthesis Of Amino Acids; Phenylalanine Metabolism; Phenylalanine, Tyrosine And Tryptophan Biosynthesis	2-oxocarboxylic Acid Metabolism; Biosynthesis Of Amino Acids; AAA metabolism (Trp/Phe/Tyr)	False	False
PHEtec	SLC16A10 or SLC43A2	0.6058	0	0.3722	Extracellular Transport	Extracellular Transport	False	False
PPAm	PPA2 or LHPP or PPA1	0.3294	0	0.361	Oxidative Phosphorylation	Oxidative Phosphorylation	False	False
PPCOACm	PCCB and PCCA	0.2503	0	0.4245	Glyoxylate And Dicarboxylate Metabolism; Propanoate Metabolism; Valine, Leucine And Isoleucine Biosynthesis; Valine, Leucine And Isoleucine Degradation	Glyoxylate And Dicarboxylate Metabolism; Propanoate Metabolism; BCAA metabolism (Val/Leu/Iso)	False	False
PPM	PGM1 or PGM2	0.6959	0	0.1658	Pentose Phosphate Pathway; Purine Metabolism	Redox & Pentose Metabolism; Nitrogen disposal	False	False
PRAGSr	GART or GART-B	0.0222	0	0.9734	Purine Metabolism; Purine Synthesis	Nitrogen disposal; Nucleotide metabolism	False	False
PRASCS	PAICS	0.1133	0	0.7817	Purine Metabolism; Purine Synthesis	Nitrogen disposal; Nucleotide metabolism	False	False
PRFGS	PFAS	0	0		Purine Metabolism; Purine Synthesis	Nitrogen disposal; Nucleotide metabolism	False	False
PROt4	SLC38A1 or SLC6A14 or SLC38A2 or SLC22A5 or (SLC6A19 and TMEM27) or (SLC6A19 and ACE2)	1.3991	0	0.6849	Extracellular Transport	Extracellular Transport	False	False
PRPPS	PRPS1L1 or PRPS2	0.5644	0	0.508	Biosynthesis Of Amino Acids; Pentose Phosphate Pathway; Purine Metabolism	Biosynthesis Of Amino Acids; Redox & Pentose Metabolism; Nitrogen disposal	False	False
PSDm_hs	PISD	-0.1478	0	0.7986	Glycerophospholipid Metabolism	Lipid metabolism	False	False
PSFLIP	ATP8A1 or ATP10A	1.0179	0	0.1386	Extracellular Transport	Extracellular Transport	False	False
PSSA1_hs	PTDSS1	0.4997	0	0.1167	Glycerophospholipid Metabolism	Lipid metabolism	False	False
PUNP1	PNP	0	0		Nucleotide Interconversion; Nucleotide Metabolism; Purine Metabolism	Nucleotide metabolism; Nitrogen disposal	False	False
PUNP2	PNP	0	0		Nucleotide Metabolism; Purine Catabolism; Purine Metabolism	Nucleotide metabolism; Purine Catabolism; Nitrogen disposal	False	False
PUNP3	PNP	0	0		Nucleotide Metabolism; Purine Catabolism; Purine Metabolism	Nucleotide metabolism; Purine Catabolism; Nitrogen disposal	False	False
PUNP4	PNP	0	0		Nucleotide Metabolism; Purine Catabolism; Purine Metabolism	Nucleotide metabolism; Purine Catabolism; Nitrogen disposal	False	False
PYNP2r	UPP2	0.2162	0	0.8674	Nucleotide Metabolism; Pyrimidine Catabolism; Pyrimidine Metabolism	Nucleotide metabolism	False	False
RE0452M	DTYMK	0.4761	0	0.7938	Pyrimidine Synthesis	Nucleotide metabolism	False	False
RNDR2	(RRM1 and RRM2) or RRM2B	-0.0511	0	0.9282	Nucleotide Interconversion	Nucleotide metabolism	False	False
RNDR3	(RRM1 and RRM2) or RRM2B	-0.0511	0	0.9282	Nucleotide Interconversion	Nucleotide metabolism	False	False
RPI	RPIA	-0.3266	0	0.62	Biosynthesis Of Amino Acids; Pentose Phosphate Pathway	Biosynthesis Of Amino Acids; Redox & Pentose Metabolism	False	False
SERPT	SGMS1	-0.7193	0	0.1186	Sphingolipid Metabolism	Lipid metabolism	False	False
SERt4	SLC38A1 or SLC6A14 or SLC38A2 or SLC22A5 or (SLC6A19 and TMEM27) or (SLC6A19 and ACE2)	1.3991	0	0.6849	Extracellular Transport	Extracellular Transport	False	False
THRt4	SLC38A1 or SLC6A14 or SLC38A2 or SLC22A5 or (SLC6A19 and TMEM27) or (SLC6A19 and ACE2)	1.3991	0	0.6849	Extracellular Transport	Extracellular Transport	False	False
TMDSm	TYMS	-0.1594	0	0.8897	Nucleotide Interconversion	Nucleotide metabolism	False	False
TPI	TPI1	0	0		Glycolysis/Gluconeogenesis	Central Energy Metabolism	False	False
TRDR	TXNRD1	0.3361	0	0.7345	Nucleotide Interconversion	Nucleotide metabolism	False	False
TRPO2	TDO2 or IDO2	2.6418	0	0.0464	Tryptophan Metabolism	AAA metabolism (Trp/Phe/Tyr)	False	False
TRPt	SLC36A4 or SLC16A10	0.6058	0	0.2293	Extracellular Transport	Extracellular Transport	False	False
TYRPHELAT2tc	SLC7A5	0.0135	0	0.9888	Extracellular Transport	Extracellular Transport	False	False
UMPK2m	CMPK2	0	0		Nucleotide Interconversion	Nucleotide metabolism	False	False
URIDK2	DTYMK	0.4761	0	0.7938	Nucleotide Interconversion; Nucleotide Metabolism; Pyrimidine Metabolism	Nucleotide metabolism	False	False
URIt	SLC29A1 or SLC29A3	0.0092	0	0.9801	Extracellular Transport	Extracellular Transport	False	False
VALTA	BCAT1	0.0468	0	0.9379	2-oxocarboxylic Acid Metabolism; Biosynthesis Of Amino Acids; Pantothenate And Coa Biosynthesis; Valine, Leucine And Isoleucine Biosynthesis; Valine, Leucine And Isoleucine Degradation	2-oxocarboxylic Acid Metabolism; Biosynthesis Of Amino Acids; Pantothenate And Coa Biosynthesis; BCAA metabolism (Val/Leu/Iso)	False	False
VALtec	SLC43A2	0.0198	0	0.9875	Extracellular Transport	Extracellular Transport	False	False
r0034	CPS1	0	0		Alanine, Aspartate And Glutamate Metabolism; Arginine Biosynthesis; Biosynthesis Of Amino Acids; Nitrogen Metabolism; Urea Cycle	AA central (A/D/E,G/S/T); AA other (Cys/Met/Lys/Arg/Pro); Biosynthesis Of Amino Acids; Nitrogen disposal	False	False
r0226	DHFR	0.4212	0	0.4284	Folate Metabolism	Folate Metabolism	False	False
r0385	BCKDHA and BCKDHB	-0.1167	0	0.7992	Valine, Leucine And Isoleucine Biosynthesis	BCAA metabolism (Val/Leu/Iso)	False	False
r0475	RRM1 and RRM2 and RRM2B	-0.2694	0	0.9347	Nucleotide Interconversion	Nucleotide metabolism	False	False
r0531	UCK2 or UCK1 or UCKL1 or LOC776992	0.5193	0	0.3964	Nucleotide Interconversion	Nucleotide metabolism	False	False
r0560	ACADS	0.0354	0	0.9388	Valine, Leucine And Isoleucine Biosynthesis	BCAA metabolism (Val/Leu/Iso)	False	False
r0561	DBT	0.0966	0	0.8209	Valine, Leucine And Isoleucine Biosynthesis	BCAA metabolism (Val/Leu/Iso)	False	False
r0603	ACADS and LOC423987	0	0		Valine, Leucine And Isoleucine Biosynthesis	BCAA metabolism (Val/Leu/Iso)	False	False
r0604	DBT	0.0966	0	0.8209	Valine, Leucine And Isoleucine Biosynthesis	BCAA metabolism (Val/Leu/Iso)	False	False
r0666	GART or GART-B	0.0222	0	0.9734	Purine Synthesis	Nucleotide metabolism	False	False
r0670	BCKDHA and BCKDHB	-0.1167	0	0.7992	Valine, Leucine And Isoleucine Biosynthesis	BCAA metabolism (Val/Leu/Iso)	False	False

## Sheet: LM
Reaction ID	GPR rule (genes)	Transcript effect (log2FC)	Flux change log2(FG/SG)	Adjusted p-value (FDR)	Metabolic pathways	Pathway group	Concordant (transcript–flux)	Significant reaction (transcript effect & flux ratio)
PSP__Lm	PSPH	-0.5392	-6.6439	0.1485	Alanine, Aspartate And Glutamate Metabolism; Glycine, Serine And Threonine Metabolism	AA central (A/D/E,G/S/T)	True	True
COAtim	SLC25A16	1.1639	3	0.0271	Transport, Mitochondrial	Mitochondrial transport	True	True
CYSGLUexR	SLC7A10 or SLC7A5	0.8807	3	0.5657	Extracellular Transport	Extracellular Transport	True	True
PYRt2	SLC16A3 or SLC16A7 or LOC416086 or SLC16A1	0.6022	3	0.3296	Extracellular Transport	Extracellular Transport	True	True
r0130	GGT2 or GGT2P	0.8911	3	0.1032	Glutathione Metabolism	Redox & Pentose Metabolism	True	True
ECOAH1m	HADHA and ECHS1	-0.5872	-2.4739	0.1877	Butanoate Metabolism; Fatty Acid Degradation; Fatty Acid Metabolism; Lysine Degradation; Tryptophan Metabolism	Butanoate Metabolism; Lipid metabolism; AA other (Cys/Met/Lys/Arg/Pro); AAA metabolism (Trp/Phe/Tyr)	True	True
PDHm	DLAT	3.1788	1.844	0	2-oxocarboxylic Acid Metabolism; Glycolysis/Gluconeogenesis	2-oxocarboxylic Acid Metabolism; Central Energy Metabolism	True	True
r1418	CA15L or CA9	0.7373	1.844	0.262	Nitrogen Metabolism	Nitrogen disposal	True	True
CSm	CS	1.1799	1.4005	0.0114	2-oxocarboxylic Acid Metabolism; Biosynthesis Of Amino Acids; Citric Acid Cycle; Glyoxylate And Dicarboxylate Metabolism	2-oxocarboxylic Acid Metabolism; Biosynthesis Of Amino Acids; Central Energy Metabolism; Glyoxylate And Dicarboxylate Metabolism	True	True
GLUDxm	GLUD2	1.0502	0.8875	0.0089	Alanine, Aspartate And Glutamate Metabolism; Arginine Biosynthesis; Nitrogen Metabolism; Taurine And Hypotaurine Metabolism	AA central (A/D/E,G/S/T); AA other (Cys/Met/Lys/Arg/Pro); Nitrogen disposal; Taurine And Hypotaurine Metabolism	True	True
2HCO3_NAt	SLC4A5 or SLC4A4 or SLC4A9	1.6648	0.5261	0.361	Extracellular Transport	Extracellular Transport	True	True
GHMT2rm	SHMT1	1.7742	-6.6439	0	Alanine, Aspartate And Glutamate Metabolism; Biosynthesis Of Amino Acids; Cyanoamino Acid Metabolism; Folate Metabolism; Glycine, Serine And Threonine Metabolism; Glyoxylate And Dicarboxylate Metabolism; Methane Metabolism	AA central (A/D/E,G/S/T); Biosynthesis Of Amino Acids; Cyanoamino Acid Metabolism; Folate Metabolism; Glyoxylate And Dicarboxylate Metabolism; Methane Metabolism	False	True
PSERT	PSAT1	0.9791	-6.6439	0	Alanine, Aspartate And Glutamate Metabolism; Biosynthesis Of Amino Acids; Cysteine And Methionine Metabolism; Glycine, Serine And Threonine Metabolism; Methane Metabolism	AA central (A/D/E,G/S/T); Biosynthesis Of Amino Acids; AA other (Cys/Met/Lys/Arg/Pro); Methane Metabolism	False	True
HMGCOASim	HMGCS2	0.9772	-2.4739	0.0211	Butanoate Metabolism; Synthesis And Degradation Of Ketone Bodies; Terpenoid Backbone Biosynthesis; Valine, Leucine And Isoleucine Degradation	Butanoate Metabolism; Lipid metabolism; Terpenoid Backbone Biosynthesis; BCAA metabolism (Val/Leu/Iso)	False	True
HMGLm	HMGCL or HMGCLL1	1.4193	-2.4739	0.0273	Butanoate Metabolism; Cholesterol Metabolism; Valine, Leucine And Isoleucine Degradation	Butanoate Metabolism; Lipid metabolism; BCAA metabolism (Val/Leu/Iso)	False	True
r0541	GCDH	0.6191	-2.4739	0.0593	Tryptophan Metabolism	AAA metabolism (Trp/Phe/Tyr)	False	True
GCC2am	AMT and DLD and GLDC and GCSH	-0.0396	-6.6439	0.9375	Alanine, Aspartate And Glutamate Metabolism; Glycine, Serine And Threonine Metabolism	AA central (A/D/E,G/S/T)	True	False
GCC2bim	AMT and DLD and GLDC and GCSH	-0.0396	-6.6439	0.9375	Alanine, Aspartate And Glutamate Metabolism; Glycine, Serine And Threonine Metabolism	AA central (A/D/E,G/S/T)	True	False
ACCOACm	369504 or ACACB	0.1426	3	0.7398	Fatty Acid Biosynthesis; Fatty Acid Degradation; Fatty Acid Metabolism; Propanoate Metabolism; Pyruvate Metabolism	Lipid metabolism; Propanoate Metabolism; Central Energy Metabolism	True	False
GCC2cm	DLD	-0.0396	-2.8365	0.9375	Glycolysis/Gluconeogenesis	Central Energy Metabolism	True	False
2OXOADOXm	DLST	-0.0556	-2.4739	0.9047	2-oxocarboxylic Acid Metabolism; Lysine Metabolism; Tryptophan Metabolism	2-oxocarboxylic Acid Metabolism; AA other (Cys/Met/Lys/Arg/Pro); AAA metabolism (Trp/Phe/Tyr)	True	False
AACOAT	AACS	-0.3617	-2.4739	0.2092	Butanoate Metabolism; Valine, Leucine And Isoleucine Degradation	Butanoate Metabolism; BCAA metabolism (Val/Leu/Iso)	True	False
ACACT1r	ACAT2	-0.2818	-2.4739	0.4482	Butanoate Metabolism; Fatty Acid Degradation; Fatty Acid Metabolism; Glyoxylate And Dicarboxylate Metabolism; Lysine Degradation; Pyruvate Metabolism; Terpenoid Backbone Biosynthesis; Tryptophan Metabolism; Valine, Leucine And Isoleucine Degradation	Butanoate Metabolism; Lipid metabolism; Glyoxylate And Dicarboxylate Metabolism; AA other (Cys/Met/Lys/Arg/Pro); Central Energy Metabolism; Terpenoid Backbone Biosynthesis; AAA metabolism (Trp/Phe/Tyr); BCAA metabolism (Val/Leu/Iso)	True	False
HACD1m	XRN1 or HADH	-0.2573	-2.4739	0.2891	Butanoate Metabolism; Fatty Acid Degradation; Fatty Acid Metabolism; Lysine Degradation; Tryptophan Metabolism	Butanoate Metabolism; Lipid metabolism; AA other (Cys/Met/Lys/Arg/Pro); AAA metabolism (Trp/Phe/Tyr)	True	False
ME2m	ME1 or ME3	0.4658	1.757	0.3675	Pyruvate Metabolism	Central Energy Metabolism	True	False
r1418m	CA5A	0.0718	1.3219	0.8941	Nitrogen Metabolism	Nitrogen disposal	True	False
BTNt2	SLC16A1	0.4557	0.9107	0.2053	Extracellular Transport	Extracellular Transport	True	False
3DSPHR	KDSR	0.5465	0.4854	0.0287	Sphingolipid Metabolism	Lipid metabolism	True	False
3HKYNAKGAT	KYAT3	0.2436	0.4854	0.4011	Tryptophan Metabolism	AAA metabolism (Trp/Phe/Tyr)	True	False
ADKd	AK5	0.7319	0.4854	0.4882	Nucleotide Interconversion	Nucleotide metabolism	True	False
ADSS	ADSS2 or ADSS1	0.9448	0.4854	0.0327	Alanine, Aspartate And Glutamate Metabolism; Nucleotide Interconversion; Nucleotide Metabolism; Purine Metabolism	AA central (A/D/E,G/S/T); Nucleotide metabolism; Nitrogen disposal	True	False
AGPAT1	AGPAT2 or GPAT4 or AGPAT4 or AGPAT3 or AGPAT5 or AGPAT1 or MBOAT2	0.2901	0.4854	0.4106	Triacylglycerol Synthesis	Lipid metabolism	True	False
AICART	ATIC	0.0596	0.4854	0.9269	Folate Metabolism; Purine Metabolism; Purine Synthesis	Folate Metabolism; Nitrogen disposal; Nucleotide metabolism	True	False
AIRCr	PAICS	0.1109	0.4854	0.7045	Purine Metabolism; Purine Synthesis	Nitrogen disposal; Nucleotide metabolism	True	False
ALATA__L	GPT2	1.9238	0.4854	0.0006	2-oxocarboxylic Acid Metabolism; Alanine, Aspartate And Glutamate Metabolism; Arginine Biosynthesis; Biosynthesis Of Amino Acids	2-oxocarboxylic Acid Metabolism; AA central (A/D/E,G/S/T); AA other (Cys/Met/Lys/Arg/Pro); Biosynthesis Of Amino Acids	True	False
ARGLYSex	SLC7A6	0.1785	0.4854	0.6403	Extracellular Transport	Extracellular Transport	True	False
ASPTA	GOT1 or IL4I1	0.1741	0.4854	0.6879	2-oxocarboxylic Acid Metabolism; Alanine, Aspartate And Glutamate Metabolism; Arginine Biosynthesis; Biosynthesis Of Amino Acids	2-oxocarboxylic Acid Metabolism; AA central (A/D/E,G/S/T); AA other (Cys/Met/Lys/Arg/Pro); Biosynthesis Of Amino Acids	True	False
CDS	CDS1 or CDS2	2.5789	0.4854	0.016	Glycerophospholipid Metabolism	Lipid metabolism	True	False
CEPTC	CEPT1 or CHPT1	0.3773	0.4854	0.0622	Glycerophospholipid Metabolism	Lipid metabolism	True	False
CHOLK	CHKA	0.2441	0.4854	0.6056	Glycerophospholipid Metabolism	Lipid metabolism	True	False
CHOLtu	LOC421583 or SLC22A1 or SLC22A5	0.1739	0.4854	0.9616	Extracellular Transport	Extracellular Transport	True	False
CLSm_hs	CRLS1	0.527	0.4854	0.3615	Glycerophospholipid Metabolism	Lipid metabolism	True	False
CTPS2	CTPS1 or CTPS2	0.4062	0.4854	0.2574	Nucleotide Metabolism; Pyrimidine Metabolism; Pyrimidine Synthesis	Nucleotide metabolism	True	False
CYTDK1	UCK2 or UCK1	0.8155	0.4854	0.0263	Nucleotide Interconversion; Nucleotide Metabolism; Pyrimidine Metabolism	Nucleotide metabolism	True	False
CYTDt	SLC29A1 or SLC29A3	0.1575	0.4854	0.7386	Extracellular Transport	Extracellular Transport	True	False
DAGK_hs	DGKI or DGKZ or DGKD or DGKH or DGKE or DGKQ or DGKK or DGKE or DGKI	1.3235	0.4854	0.4233	Glycerophospholipid Metabolism	Lipid metabolism	True	False
DCMPDA	DCTD	0.1346	0.4854	0.8417	Pyrimidine Catabolism	Nucleotide metabolism	True	False
DGAT	DGAT2	1.2402	0.4854	0.0309	Triacylglycerol Synthesis	Lipid metabolism	True	False
DGK1	GUK1	0.3622	0.4854	0.4701	Nucleotide Interconversion	Nucleotide metabolism	True	False
DNDPt14m	SLC25A19	0.3796	0.4854	0.1648	Transport, Mitochondrial	Mitochondrial transport	True	False
DUTPDPm	DUT or ITPA	0.286	0.4854	0.4912	Nucleotide Interconversion	Nucleotide metabolism	True	False
FAS100COA	FASN or (FASN and ELOVL6 and ELOVL5 and ELOVL2)	0.6117	0.4854	0.237	Fatty Acid Biosynthesis	Lipid metabolism	True	False
FAS120COA	FASN or (FASN and ELOVL6 and ELOVL5 and ELOVL2)	0.6117	0.4854	0.237	Fatty Acid Biosynthesis	Lipid metabolism	True	False
FAS140COA	FASN or (FASN and ELOVL6 and ELOVL5 and ELOVL2)	0.6117	0.4854	0.237	Fatty Acid Biosynthesis	Lipid metabolism	True	False
FAS160COA	FASN or (FASN and ELOVL6 and ELOVL5 and ELOVL2)	0.6117	0.4854	0.237	Fatty Acid Biosynthesis	Lipid metabolism	True	False
FAS80COA__L	FASN	0.6117	0.4854	0.1869	Fatty Acid Biosynthesis	Lipid metabolism	True	False
FKYNH	AFMID	0.2649	0.4854	0.4804	Tryptophan Metabolism	AAA metabolism (Trp/Phe/Tyr)	True	False
FTHFL	MTHFD1	0.5023	0.4854	0.1245	Folate Metabolism	Folate Metabolism	True	False
G6PDH2r	IDH1 or PGD	0.1045	0.4854	0.0121	Pentose Phosphate Pathway	Redox & Pentose Metabolism	True	False
GARFT	GART or GART-B	0.1914	0.4854	0.6497	Folate Metabolism; Purine Metabolism; Purine Synthesis	Folate Metabolism; Nitrogen disposal; Nucleotide metabolism	True	False
GK1	GUK1	0.3622	0.4854	0.4701	Nucleotide Interconversion; Nucleotide Metabolism; Purine Metabolism	Nucleotide metabolism; Nitrogen disposal	True	False
GLUPRT	PPAT	0.0705	0.4854	0.9313	Alanine, Aspartate And Glutamate Metabolism; Purine Metabolism; Purine Synthesis	AA central (A/D/E,G/S/T); Nitrogen disposal; Nucleotide metabolism	True	False
GUAPRT	HPRT1 or LOC769866 or APRT	0.167	0.4854	0.0145	Nucleotide Metabolism; Nucleotide Salvage Pathway; Purine Metabolism	Nucleotide metabolism; Nucleotide Salvage Pathway; Nitrogen disposal	True	False
HUMANGEM_MAR05036	SLC29A1	0.1575	0.4854	0.645	Transport, Mitochondrial	Mitochondrial transport	True	False
HUMANGEM_MAR20147	SLC25A36	0.5068	0.4854	0.0534	Transport, Mitochondrial	Mitochondrial transport	True	False
HUMANGEM_MAR20148	SLC25A36	0.5068	0.4854	0.0534	Transport, Mitochondrial	Mitochondrial transport	True	False
IMPC	ATIC	0.0596	0.4854	0.9269	Purine Metabolism; Purine Synthesis	Nitrogen disposal; Nucleotide metabolism	True	False
KYN3OX	KMO	0.466	0.4854	0.397	Tryptophan Metabolism	AAA metabolism (Trp/Phe/Tyr)	True	False
LPASE	PLA2G4A	0.5305	0.4854	0.5322	Glycerophospholipid Metabolism	Lipid metabolism	True	False
NDPK1	NME3 or NME2 or NME6 or NME7 or (NME2 and NME1) or PKLR	0.4576	0.4854	0.0213	Nucleotide Interconversion; Nucleotide Metabolism; Purine Metabolism	Nucleotide metabolism; Nitrogen disposal	True	False
NDPK3m	NME4 or NME6 or NME1	0.4679	0.4854	0.2785	Nucleotide Interconversion; Nucleotide Metabolism; Pyrimidine Metabolism	Nucleotide metabolism	True	False
NDPK4n	NT5C2 or NT5C1B or NT5C1A or LOC770392 or NT5C3B or NT5DC4 or NT5C3A	1.6812	0.4854	0.0097	Nucleotide Interconversion; Nucleotide Metabolism; Pyrimidine Metabolism	Nucleotide metabolism	True	False
NDPK8	NME3 or NME2 or NME6 or NME7 or (NME2 and NME1) or PKLR	0.4576	0.4854	0.0213	Nucleotide Interconversion; Nucleotide Metabolism; Purine Metabolism	Nucleotide metabolism; Nitrogen disposal	True	False
NDPK8m	NME4 or NME6 or NME1	0.4679	0.4854	0.2785	Nucleotide Interconversion; Nucleotide Metabolism; Purine Metabolism	Nucleotide metabolism; Nitrogen disposal	True	False
NTD2	NT5C2 or NT5C1B or NT5C1A or LOC770392 or NT5C3B or NT5DC4	1.6812	0.4854	0.0084	Nucleotide Metabolism; Pyrimidine Catabolism; Pyrimidine Metabolism	Nucleotide metabolism	True	False
NTD7	NT5C2 or NT5C1B or NT5C1A or LOC770392 or NT5C3B or NT5DC4	1.6812	0.4854	0.0084	Nucleotide Interconversion; Nucleotide Metabolism; Purine Metabolism	Nucleotide metabolism; Nitrogen disposal	True	False
NTD8	NT5C2 or NT5C1B or NT5C1A or LOC770392 or NT5C3B or NT5DC4	1.6812	0.4854	0.0084	Nucleotide Interconversion; Nucleotide Metabolism; Purine Metabolism	Nucleotide metabolism; Nitrogen disposal	True	False
NTD9m	NT5M	0.6169	0.4854	0.0787	Nucleotide Interconversion	Nucleotide metabolism	True	False
PCt	ABCB1LA or ABCA1	1.5667	0.4854	0.2949	Extracellular Transport	Extracellular Transport	True	False
PGMT	PGM1 or PGM2	0.4588	0.4854	0.3494	Glycolysis/Gluconeogenesis	Central Energy Metabolism	True	False
PHEtec	SLC16A10 or SLC43A2	0.8932	0.4854	0.0299	Extracellular Transport	Extracellular Transport	True	False
PPM	PGM1 or PGM2	0.4588	0.4854	0.3494	Pentose Phosphate Pathway; Purine Metabolism	Redox & Pentose Metabolism; Nitrogen disposal	True	False
PRAGSr	GART or GART-B	0.1914	0.4854	0.6497	Purine Metabolism; Purine Synthesis	Nitrogen disposal; Nucleotide metabolism	True	False
PRASCS	PAICS	0.1109	0.4854	0.7045	Purine Metabolism; Purine Synthesis	Nitrogen disposal; Nucleotide metabolism	True	False
PRPPS	PRPS1L1 or PRPS2	0.7239	0.4854	0.209	Biosynthesis Of Amino Acids; Pentose Phosphate Pathway; Purine Metabolism	Biosynthesis Of Amino Acids; Redox & Pentose Metabolism; Nitrogen disposal	True	False
PSDm_hs	PISD	0.0912	0.4854	0.836	Glycerophospholipid Metabolism	Lipid metabolism	True	False
PSFLIP	ATP8A1 or ATP10A	0.6776	0.4854	0.2935	Extracellular Transport	Extracellular Transport	True	False
PSSA1_hs	PTDSS1	0.3828	0.4854	0.1173	Glycerophospholipid Metabolism	Lipid metabolism	True	False
RE0452M	DTYMK	1.7649	0.4854	0.0945	Pyrimidine Synthesis	Nucleotide metabolism	True	False
RPI	RPIA	0.3373	0.4854	0.4462	Biosynthesis Of Amino Acids; Pentose Phosphate Pathway	Biosynthesis Of Amino Acids; Redox & Pentose Metabolism	True	False
SERt4	SLC38A1 or SLC6A14 or SLC38A2 or SLC22A5 or (SLC6A19 and TMEM27) or (SLC6A19 and ACE2)	0.4676	0.4854	0.7064	Extracellular Transport	Extracellular Transport	True	False
THRt4	SLC38A1 or SLC6A14 or SLC38A2 or SLC22A5 or (SLC6A19 and TMEM27) or (SLC6A19 and ACE2)	0.4676	0.4854	0.7064	Extracellular Transport	Extracellular Transport	True	False
TRDR	TXNRD1	0.0466	0.4854	0.9499	Nucleotide Interconversion	Nucleotide metabolism	True	False
TRPO2	TDO2 or IDO2	1.948	0.4854	0.1708	Tryptophan Metabolism	AAA metabolism (Trp/Phe/Tyr)	True	False
TRPt	SLC36A4 or SLC16A10	0.8932	0.4854	0.0154	Extracellular Transport	Extracellular Transport	True	False
TYRPHELAT2tc	SLC7A5	0.333	0.4854	0.5657	Extracellular Transport	Extracellular Transport	True	False
URIDK2	DTYMK	1.7649	0.4854	0.0945	Nucleotide Interconversion; Nucleotide Metabolism; Pyrimidine Metabolism	Nucleotide metabolism	True	False
URIt	SLC29A1 or SLC29A3	0.1575	0.4854	0.7386	Extracellular Transport	Extracellular Transport	True	False
r0034	CPS1	2.3045	0.4854	0.0027	Alanine, Aspartate And Glutamate Metabolism; Arginine Biosynthesis; Biosynthesis Of Amino Acids; Nitrogen Metabolism; Urea Cycle	AA central (A/D/E,G/S/T); AA other (Cys/Met/Lys/Arg/Pro); Biosynthesis Of Amino Acids; Nitrogen disposal	True	False
r0129	GGT2 or GGT2P	0.8911	0.4854	0.1032	Glutathione Metabolism	Redox & Pentose Metabolism	True	False
r0202c	GPD1L2	0.1995	0.4854	0.7753	Glycerophospholipid Metabolism	Lipid metabolism	True	False
r0226	DHFR	0.6771	0.4854	0.0572	Folate Metabolism	Folate Metabolism	True	False
r0531	UCK2 or UCK1 or UCKL1 or LOC776992	1.6919	0.4854	0.0463	Nucleotide Interconversion	Nucleotide metabolism	True	False
r0666	GART or GART-B	0.1914	0.4854	0.6497	Purine Synthesis	Nucleotide metabolism	True	False
r1418c	CA13 or CA4 or CA3A or CA3B or CA8 or LOC421187	1.4308	0.4751	0.2678	Nitrogen Metabolism	Nitrogen disposal	True	False
ECOAH12m	HADHA and EHHADH and ECHS1	-0.5872	-0.3401	0.1877	Valine, Leucine And Isoleucine Biosynthesis; Valine, Leucine And Isoleucine Degradation	BCAA metabolism (Val/Leu/Iso)	True	False
r0385	BCKDHA and BCKDHB	-0.1036	-0.3401	0.9445	Valine, Leucine And Isoleucine Biosynthesis	BCAA metabolism (Val/Leu/Iso)	True	False
r0560	ACADS	-0.1996	-0.3401	0.6218	Valine, Leucine And Isoleucine Biosynthesis	BCAA metabolism (Val/Leu/Iso)	True	False
r0561	DBT	-0.1059	-0.3401	0.7659	Valine, Leucine And Isoleucine Biosynthesis	BCAA metabolism (Val/Leu/Iso)	True	False
ADK1	AK1 or AK7 or AK8 or AK5	2.1664	0.263	0.1968	Nucleotide Interconversion; Nucleotide Metabolism; Purine Metabolism	Nucleotide metabolism; Nitrogen disposal	True	False
PPAm	PPA2 or LHPP or PPA1	0.4658	0.263	0.0958	Oxidative Phosphorylation	Oxidative Phosphorylation	True	False
MMEm	MCEE	-0.7258	-0.2176	0.162	Glyoxylate And Dicarboxylate Metabolism; Propanoate Metabolism; Valine, Leucine And Isoleucine Biosynthesis; Valine, Leucine And Isoleucine Degradation	Glyoxylate And Dicarboxylate Metabolism; Propanoate Metabolism; BCAA metabolism (Val/Leu/Iso)	True	False
MMMm	MUT	-0.5688	-0.2176	0.0233	Glyoxylate And Dicarboxylate Metabolism; Propanoate Metabolism; Valine, Leucine And Isoleucine Biosynthesis; Valine, Leucine And Isoleucine Degradation	Glyoxylate And Dicarboxylate Metabolism; Propanoate Metabolism; BCAA metabolism (Val/Leu/Iso)	True	False
GLUt2m	SLC25A12 or SLC25A22 or SLC25A13	0.4278	0.1375	0.324	Transport, Mitochondrial	Mitochondrial transport	True	False
ACACT10m	ACAT1 or ACAA2	-0.045	-0.1361	0.7832	Valine, Leucine And Isoleucine Biosynthesis; Valine, Leucine And Isoleucine Degradation	BCAA metabolism (Val/Leu/Iso)	True	False
ECOAH9m	HADHA and EHHADH and ECHS1	-0.5872	-0.1361	0.1877	Valine, Leucine And Isoleucine Biosynthesis; Valine, Leucine And Isoleucine Degradation	BCAA metabolism (Val/Leu/Iso)	True	False
LDH__L	LDHB and LDHA	-0.02	-0.1361	0.9786	Pyruvate Metabolism	Central Energy Metabolism	True	False
r0276	GMPR2	-0.3336	-0.1361	0.4158	Nucleotide Metabolism; Purine Catabolism; Purine Metabolism	Nucleotide metabolism; Purine Catabolism; Nitrogen disposal	True	False
r0603	ACADS and LOC423987	-0.1996	-0.1361		Valine, Leucine And Isoleucine Biosynthesis	BCAA metabolism (Val/Leu/Iso)	True	False
r0604	DBT	-0.1059	-0.1361	0.7659	Valine, Leucine And Isoleucine Biosynthesis	BCAA metabolism (Val/Leu/Iso)	True	False
r0670	BCKDHA and BCKDHB	-0.1036	-0.1361	0.9445	Valine, Leucine And Isoleucine Biosynthesis	BCAA metabolism (Val/Leu/Iso)	True	False
AKGMALtm	SLC25A11 or SLC25A10	0.3117	0.1243	0.4428	Transport, Mitochondrial	Mitochondrial transport	True	False
FUMm	FH	0.4636	0.1243	0.2102	Citric Acid Cycle; Pyruvate Metabolism	Central Energy Metabolism	True	False
FUM	FH	0.4636	0.0976	0.2102	Citric Acid Cycle; Pyruvate Metabolism	Central Energy Metabolism	True	False
FUMSO4tm	SLC25A10	0.3117	0.0976	0.4428	Transport, Mitochondrial	Mitochondrial transport	True	False
MALSO4tm	SLC25A10	0.3117	0.0976	0.4428	Transport, Mitochondrial	Mitochondrial transport	True	False
PHETA1	GOT1	0.1019	0.0704	0.8594	2-oxocarboxylic Acid Metabolism; Biosynthesis Of Amino Acids; Phenylalanine Metabolism; Phenylalanine, Tyrosine And Tryptophan Biosynthesis	2-oxocarboxylic Acid Metabolism; Biosynthesis Of Amino Acids; AAA metabolism (Trp/Phe/Tyr)	True	False
PHETA1m	TAT or GOT2	1.1888	0.0704	0.0098	2-oxocarboxylic Acid Metabolism; Biosynthesis Of Amino Acids; Phenylalanine Metabolism; Phenylalanine, Tyrosine And Tryptophan Biosynthesis	2-oxocarboxylic Acid Metabolism; Biosynthesis Of Amino Acids; AAA metabolism (Trp/Phe/Tyr)	True	False
ENO	ENO1 or ENO4 or ENO2	1.1026	0.0566	0.0213	Biosynthesis Of Amino Acids; Glycolysis/Gluconeogenesis; Methane Metabolism	Biosynthesis Of Amino Acids; Central Energy Metabolism; Methane Metabolism	True	False
MALtm	SLC25A10	0.3117	0.0566	0.4428	Transport, Mitochondrial	Mitochondrial transport	True	False
PYK	PKLR	0.4576	0.0566	0.2614	Biosynthesis Of Amino Acids; Glycolysis/Gluconeogenesis; Pyruvate Metabolism	Biosynthesis Of Amino Acids; Central Energy Metabolism	True	False
GLNtN1	SLC38A3	-0.0178	-0.0439	0.9719	Extracellular Transport	Extracellular Transport	True	False
ATPtm	SLC25A4 or SLC25A6 or SLC25A5	0.1447	0.0144	0.0006	Transport, Mitochondrial	Mitochondrial transport	True	False
PGCD	PHGDH	0.0274	-6.6439	0.9622	Alanine, Aspartate And Glutamate Metabolism; Biosynthesis Of Amino Acids; Cysteine And Methionine Metabolism; Glycine, Serine And Threonine Metabolism; Methane Metabolism	AA central (A/D/E,G/S/T); Biosynthesis Of Amino Acids; AA other (Cys/Met/Lys/Arg/Pro); Methane Metabolism	False	False
MDH	MDH2 or MDH1	0.0917	-4.0589	0.3029	Citric Acid Cycle; Glyoxylate And Dicarboxylate Metabolism; Methane Metabolism; Pyruvate Metabolism	Central Energy Metabolism; Glyoxylate And Dicarboxylate Metabolism; Methane Metabolism	False	False
LYStm	SLC25A15	0.3746	-2.4739	0.3796	Transport, Mitochondrial	Mitochondrial transport	False	False
SACCD3m	AASS	0.1394	-2.4739	0.6527	Lysine Degradation; Lysine Metabolism	AA other (Cys/Met/Lys/Arg/Pro)	False	False
r0450	AADAT	0.2118	-2.4739	0.6456	2-oxocarboxylic Acid Metabolism; Biosynthesis Of Amino Acids; Lysine Biosynthesis; Lysine Degradation; Lysine Metabolism	2-oxocarboxylic Acid Metabolism; Biosynthesis Of Amino Acids; Lysine Biosynthesis; AA other (Cys/Met/Lys/Arg/Pro)	False	False
r0525	AASS	0.1394	-2.4739	0.6527	Lysine Degradation; Lysine Metabolism	AA other (Cys/Met/Lys/Arg/Pro)	False	False
r0594m	ALDH7A1	0.0158	-2.4739	0.9641	Lysine Metabolism	AA other (Cys/Met/Lys/Arg/Pro)	False	False
PROt4	SLC38A1 or SLC6A14 or SLC38A2 or SLC22A5 or (SLC6A19 and TMEM27) or (SLC6A19 and ACE2)	0.4676	-1.5995	0.7064	Extracellular Transport	Extracellular Transport	False	False
ACONTm	ACO2 or ACO1	-0.1135	1.4005	0.4272	2-oxocarboxylic Acid Metabolism; Biosynthesis Of Amino Acids; Citric Acid Cycle	2-oxocarboxylic Acid Metabolism; Biosynthesis Of Amino Acids; Central Energy Metabolism	False	False
ICDHxm	IDH3B and IDH3A	-0.4809	1.4005	0.6272	2-oxocarboxylic Acid Metabolism; Biosynthesis Of Amino Acids; Citric Acid Cycle	2-oxocarboxylic Acid Metabolism; Biosynthesis Of Amino Acids; Central Energy Metabolism	False	False
PCm	PC	0	1.4005		Biosynthesis Of Amino Acids; Citric Acid Cycle; Pyruvate Metabolism	Biosynthesis Of Amino Acids; Central Energy Metabolism	False	False
BTNt4i	SLC19A3	0	0.9107		Extracellular Transport	Extracellular Transport	False	False
GLUt4	SLC38A3	-0.0178	0.6135	0.9719	Extracellular Transport	Extracellular Transport	False	False
AKGDm	OGDH and DLD and PDHX and DLST	-0.0556	0.5059	0.9375	2-oxocarboxylic Acid Metabolism; Citric Acid Cycle	2-oxocarboxylic Acid Metabolism; Central Energy Metabolism	False	False
ADSL1	ADSL	-0.4465	0.4854	0.2463	Alanine, Aspartate And Glutamate Metabolism; Nucleotide Interconversion; Nucleotide Metabolism; Purine Metabolism	AA central (A/D/E,G/S/T); Nucleotide metabolism; Nitrogen disposal	False	False
ADSL2	ADSL	-0.4465	0.4854	0.2463	Purine Metabolism; Purine Synthesis	Nitrogen disposal; Nucleotide metabolism	False	False
AMPTASECG	LAP3	-0.1097	0.4854	0.7222	Glutathione Metabolism	Redox & Pentose Metabolism	False	False
ASNtN1	SLC38A3	-0.0178	0.4854	0.9719	Extracellular Transport	Extracellular Transport	False	False
ASPCTr	CAD	-1.0307	0.4854	0.0309	Alanine, Aspartate And Glutamate Metabolism; Pyrimidine Metabolism; Pyrimidine Synthesis	AA central (A/D/E,G/S/T); Nucleotide metabolism	False	False
CHLPCTD	PCYT1A or PCYT1B	-0.13	0.4854	0.5491	Glycerophospholipid Metabolism	Lipid metabolism	False	False
CHOLESTle	LIPA	-0.3078	0.4854	0.4301	Extracellular Transport	Extracellular Transport	False	False
CYTDe	CDA	-0.1845	0.4854	0.6115	Pyrimidine Catabolism	Nucleotide metabolism	False	False
CYTK1	CMPK1	-0.5151	0.4854	0.0391	Nucleotide Interconversion; Nucleotide Metabolism; Pyrimidine Metabolism	Nucleotide metabolism	False	False
CYTK12	CMPK1	-0.5151	0.4854	0.0391	Nucleotide Interconversion	Nucleotide metabolism	False	False
CYTK1m	CMPK2	-1.435	0.4854	0.03	Nucleotide Interconversion; Nucleotide Metabolism; Pyrimidine Metabolism	Nucleotide metabolism	False	False
DHORD9	DHODH	-0.6241	0.4854	0.3522	Transport, Mitochondrial	Mitochondrial transport	False	False
DHORTS	CAD	-1.0307	0.4854	0.0309	Pyrimidine Synthesis	Nucleotide metabolism	False	False
DURIK1	TK1	-0.1074	0.4854	0.8923	Nucleotide Interconversion	Nucleotide metabolism	False	False
DURIPP	PNP or UPP2	0	0.4854	0.8278	Nucleotide Interconversion	Nucleotide metabolism	False	False
GALU	UGP2	-0.3446	0.4854	0.5465	Pentose And Glucuronate Interconversions	Redox & Pentose Metabolism	False	False
GND	PGD	-1.1707	0.4854	0.0061	Glutathione Metabolism; Pentose Phosphate Pathway	Redox & Pentose Metabolism	False	False
GPAM_hs	AGPAT5L	0	0.4854		Triacylglycerol Synthesis	Lipid metabolism	False	False
HIStN1	SLC38A3	-0.0178	0.4854	0.9719	Extracellular Transport	Extracellular Transport	False	False
INSTt2	SLC2A13	0	0.4854		Extracellular Transport	Extracellular Transport	False	False
METtec	SLC43A2	-0.3215	0.4854	0.4749	Extracellular Transport	Extracellular Transport	False	False
NDPK10	NME3 or NME2 or NME6 or NME7 or (NME2 and NME1)	-0.1822	0.4854	0.018	Nucleotide Interconversion; Nucleotide Metabolism; Purine Metabolism	Nucleotide metabolism; Nitrogen disposal	False	False
NDPK10n	NME2 and NME1	-0.1822	0.4854	0.8902	Nucleotide Interconversion; Nucleotide Metabolism; Purine Metabolism	Nucleotide metabolism; Nitrogen disposal	False	False
NDPK5	NME3 or (NME2 and NME1) or NME6 or NME7 or NME2	-0.1822	0.4854	0.018	Nucleotide Interconversion; Nucleotide Metabolism; Purine Metabolism	Nucleotide metabolism; Nitrogen disposal	False	False
NDPK6m	NME1 and NME2	-0.1822	0.4854	0.8902	Nucleotide Interconversion; Nucleotide Metabolism; Pyrimidine Metabolism	Nucleotide metabolism	False	False
OMPDC	UMPS	-0.8373	0.4854	0.0037	Pyrimidine Metabolism; Pyrimidine Synthesis	Nucleotide metabolism	False	False
ORPT	UMPS	-0.8373	0.4854	0.0037	Pyrimidine Metabolism; Pyrimidine Synthesis	Nucleotide metabolism	False	False
PGL	H6PD	-0.4971	0.4854	0.2569	Pentose Phosphate Pathway	Redox & Pentose Metabolism	False	False
PGPPTm	PGS1	-0.0935	0.4854	0.8577	Glycerophospholipid Metabolism	Lipid metabolism	False	False
PRFGS	PFAS	0	0.4854		Purine Metabolism; Purine Synthesis	Nitrogen disposal; Nucleotide metabolism	False	False
PUNP1	PNP	0	0.4854		Nucleotide Interconversion; Nucleotide Metabolism; Purine Metabolism	Nucleotide metabolism; Nitrogen disposal	False	False
PUNP2	PNP	0	0.4854		Nucleotide Metabolism; Purine Catabolism; Purine Metabolism	Nucleotide metabolism; Purine Catabolism; Nitrogen disposal	False	False
PUNP3	PNP	0	0.4854		Nucleotide Metabolism; Purine Catabolism; Purine Metabolism	Nucleotide metabolism; Purine Catabolism; Nitrogen disposal	False	False
PUNP4	PNP	0	0.4854		Nucleotide Metabolism; Purine Catabolism; Purine Metabolism	Nucleotide metabolism; Purine Catabolism; Nitrogen disposal	False	False
PYNP2r	UPP2	-0.2838	0.4854	0.8278	Nucleotide Metabolism; Pyrimidine Catabolism; Pyrimidine Metabolism	Nucleotide metabolism	False	False
RNDR2	(RRM1 and RRM2) or RRM2B	-0.3501	0.4854	0.4446	Nucleotide Interconversion	Nucleotide metabolism	False	False
RNDR3	(RRM1 and RRM2) or RRM2B	-0.3501	0.4854	0.4446	Nucleotide Interconversion	Nucleotide metabolism	False	False
SERPT	SGMS1	-0.6287	0.4854	0.1366	Sphingolipid Metabolism	Lipid metabolism	False	False
TMDSm	TYMS	-0.1626	0.4854	0.8104	Nucleotide Interconversion	Nucleotide metabolism	False	False
UMPK2m	CMPK2	-1.435	0.4854	0.03	Nucleotide Interconversion	Nucleotide metabolism	False	False
r0475	RRM1 and RRM2 and RRM2B	-0.6155	0.4854	0.5383	Nucleotide Interconversion	Nucleotide metabolism	False	False
SUCOASm	SUCLG1 and SUCLA2	-0.2109	0.4542	0.5714	Citric Acid Cycle; Propanoate Metabolism	Central Energy Metabolism; Propanoate Metabolism	False	False
r0509	SDHA and SDHB and SDHC and SDHD	-0.0176	0.4542	0.9996	Citric Acid Cycle	Central Energy Metabolism	False	False
3HBCOAHLm	HIBCH	0.0568	-0.3401	0.909	Valine, Leucine And Isoleucine Biosynthesis; Valine, Leucine And Isoleucine Degradation	BCAA metabolism (Val/Leu/Iso)	False	False
HIBDm	HIBADH or EHHADH or HADH	0.5104	-0.3401	0.1769	Valine, Leucine And Isoleucine Biosynthesis	BCAA metabolism (Val/Leu/Iso)	False	False
MMSAD1m	ALDH6A1	0.7155	-0.3401	0.0238	Valine, Leucine And Isoleucine Biosynthesis; Valine, Leucine And Isoleucine Degradation	BCAA metabolism (Val/Leu/Iso)	False	False
VALTA	BCAT1	0.5969	-0.3401	0.0376	2-oxocarboxylic Acid Metabolism; Biosynthesis Of Amino Acids; Pantothenate And Coa Biosynthesis; Valine, Leucine And Isoleucine Biosynthesis; Valine, Leucine And Isoleucine Degradation	2-oxocarboxylic Acid Metabolism; Biosynthesis Of Amino Acids; Pantothenate And Coa Biosynthesis; BCAA metabolism (Val/Leu/Iso)	False	False
PPCOACm	PCCB and PCCA	0.4413	-0.2176	0.1188	Glyoxylate And Dicarboxylate Metabolism; Propanoate Metabolism; Valine, Leucine And Isoleucine Biosynthesis; Valine, Leucine And Isoleucine Degradation	Glyoxylate And Dicarboxylate Metabolism; Propanoate Metabolism; BCAA metabolism (Val/Leu/Iso)	False	False
GMPR	ARMC4	0	-0.152		Nucleotide Interconversion; Nucleotide Metabolism; Purine Metabolism	Nucleotide metabolism; Nitrogen disposal	False	False
HACD9m	HSD17B10 or EHHADH or HADH	0.5104	-0.1361	0.0745	Valine, Leucine And Isoleucine Biosynthesis; Valine, Leucine And Isoleucine Degradation	BCAA metabolism (Val/Leu/Iso)	False	False
HUMANGEM_MAR20139	SLC25A36	0.5068	-0.1361	0.0534	Transport, Mitochondrial	Mitochondrial transport	False	False
HUMANGEM_MAR20145	SLC25A36	0.5068	-0.1361	0.0534	Transport, Mitochondrial	Mitochondrial transport	False	False
ILETA	BCAT1 or IL4I1	0.5969	-0.1361	0.0705	2-oxocarboxylic Acid Metabolism; Biosynthesis Of Amino Acids; Valine, Leucine And Isoleucine Biosynthesis; Valine, Leucine And Isoleucine Degradation	2-oxocarboxylic Acid Metabolism; Biosynthesis Of Amino Acids; BCAA metabolism (Val/Leu/Iso)	False	False
CYOOm3	COX5B and COX4I1 and COX6A1 and COX6C and COX7A2L and COX7C and COX5A and COX7B and COX7A2 and COX8A and COX2 and COX3 and COX1	-1.0166	0.0704		Oxidative Phosphorylation	Oxidative Phosphorylation	False	False
CYOR_u10m	UQCRFS1 and UQCRC1 and UQCRQ and UQCRB and UQCRC2 and UQCR11 and UQCR10 and UQCRHL and CYTB	-0.7351	0.0704		Oxidative Phosphorylation	Oxidative Phosphorylation	False	False
HUMANGEM_MAR11443	MPC1 and MPC2	0	0.0704		Transport, Mitochondrial	Mitochondrial transport	False	False
r0552	ALDH7A1	0.0158	-0.0589	0.9641	Alanine, Aspartate And Glutamate Metabolism; Folate Metabolism; Glycine, Serine And Threonine Metabolism	AA central (A/D/E,G/S/T); Folate Metabolism	False	False
r0553	ALDH7A1	0.0158	-0.0589	0.9641	Alanine, Aspartate And Glutamate Metabolism; Folate Metabolism; Glycine, Serine And Threonine Metabolism	AA central (A/D/E,G/S/T); Folate Metabolism	False	False
PGM	BPGM or PGAM1	-0.1568	0.0566	0.6005	Biosynthesis Of Amino Acids; Glycine, Serine And Threonine Metabolism; Glycolysis/Gluconeogenesis; Methane Metabolism	Biosynthesis Of Amino Acids; AA central (A/D/E,G/S/T); Central Energy Metabolism; Methane Metabolism	False	False
GLUNm	GLS2	1.273	-0.0291	0.0033	Alanine, Aspartate And Glutamate Metabolism; Arginine Biosynthesis	AA central (A/D/E,G/S/T); AA other (Cys/Met/Lys/Arg/Pro)	False	False
ATPS4m	NDUFS2 and NDUFA13 and NDUFB7 and NDUFS4 and NDUFC2 and NDUFB6 and NDUFB10 and NDUFAB1 and NDUFA8 and NDUFA5 and NDUFA12 and NDUFB2 and NDUFV3 and NDUFA9 and NDUFA7 and NDUFB9 and NDUFS6 and NDUFS3 and NDUFB1 and NDUFB8 and NDUFA10 and NDUFB3 and NDUFS1 and NDUFB5 and NDUFV2 and NDUFA6 and NDUFV1 and NDUFA2 and NDUFS8 and NDUFB4 and NDUFS7 and NDUFS5 and NDUFA4 and NDUFA1 and NDUFA11 and ND1 and …	-0.8387	0.0286		Oxidative Phosphorylation	Oxidative Phosphorylation	False	False
NADH2_u10m	NDUFS2 and NDUFA13 and NDUFB7 and NDUFS4 and NDUFC2 and NDUFB6 and NDUFB10 and NDUFAB1 and NDUFA8 and NDUFA5 and NDUFA12 and NDUFB2 and NDUFV3 and NDUFA9 and NDUFA7 and NDUFB9 and NDUFS6 and NDUFS3 and NDUFB1 and NDUFB8 and NDUFA10 and NDUFB3 and NDUFS1 and NDUFB5 and NDUFV2 and NDUFA6 and NDUFV1 and NDUFA2 and NDUFS8 and NDUFB4 and NDUFS7 and NDUFS5 and NDUFA4 and NDUFA1 and NDUFA11 and ND1 and …	-0.8387	0.0144		Oxidative Phosphorylation	Oxidative Phosphorylation	False	False
FBA	ALDOC or ALDOB	0.7735	0	0.0431	Pentose Phosphate Pathway	Redox & Pentose Metabolism	False	False
GAPD	GAPDH	0.3661	0	0.5069	Glycolysis/Gluconeogenesis	Central Energy Metabolism	False	False
GLCt1	SLC2A11 or SLC2A9 or SLC2A9L or SLC2A12 or SLC2A1 or SLC2A6 or SLC2A8 or SLC2A2 or SLC2A10	1.5006	0	0.1948	Extracellular Transport	Extracellular Transport	False	False
HEX1	ADPGK or HK2 or HK1 or HK3 or GCK or ADPGK	0.0548	0	0.5848	Glycolysis/Gluconeogenesis; Starch And Sucrose Metabolism	Central Energy Metabolism; Starch And Sucrose Metabolism	False	False
ILEtec	SLC43A2	-0.3215	0	0.4749	Extracellular Transport	Extracellular Transport	False	False
PFK	PFKP or (PFKP and PFKL) or (PFKP and PFKM) or PFKM or PFKL or (PFKL and PFKM)	0.8443	0	0.2501	Glycolysis/Gluconeogenesis	Central Energy Metabolism	False	False
PGI	GPI	0.2209	0	0.6686	Glycolysis/Gluconeogenesis	Central Energy Metabolism	False	False
PGK	PGK2	0.7001	0	0.0946	Biosynthesis Of Amino Acids; Glycolysis/Gluconeogenesis	Biosynthesis Of Amino Acids; Central Energy Metabolism	False	False
TPI	TPI1	-0.2752	0	0.6106	Glycolysis/Gluconeogenesis	Central Energy Metabolism	False	False
VALtec	SLC43A2	-0.3215	0	0.4749	Extracellular Transport	Extracellular Transport	False	False
r0552m	ALDH7A1	0.0158	0	0.9641	Alanine, Aspartate And Glutamate Metabolism; Glycine, Serine And Threonine Metabolism	AA central (A/D/E,G/S/T)	False	False
r0553m	ALDH7A1	0.0158	0	0.9641	Alanine, Aspartate And Glutamate Metabolism; Glycine, Serine And Threonine Metabolism	AA central (A/D/E,G/S/T)	False	False

## Sheet: LV
Reaction ID	GPR rule (genes)	Transcript effect (log2FC)	Flux change log2(FG/SG)	Adjusted p-value (FDR)	Metabolic pathways	Pathway group	Concordant (transcript–flux)	Significant reaction (transcript effect & flux ratio)
ARGNm	ARG2	0.5211	3	0.3155	Arginine And Proline Metabolism; Arginine Biosynthesis; Biosynthesis Of Amino Acids; Urea Cycle	AA other (Cys/Met/Lys/Arg/Pro); Biosynthesis Of Amino Acids; Nitrogen disposal	True	True
ARGtm	SLC25A15	0.8624	3	0.1591	Transport, Mitochondrial	Mitochondrial transport	True	True
PDHm	DLAT	2.8795	3	0	2-oxocarboxylic Acid Metabolism; Glycolysis/Gluconeogenesis	2-oxocarboxylic Acid Metabolism; Central Energy Metabolism	True	True
UREAt	SLC5A1 or LOC107051909 or SLC5A5 or SLC14A2	2.3227	3	0.0084	Extracellular Transport	Extracellular Transport	True	True
r0034	CPS1	1.1261	3	0.0301	Alanine, Aspartate And Glutamate Metabolism; Arginine Biosynthesis; Biosynthesis Of Amino Acids; Nitrogen Metabolism; Urea Cycle	AA central (A/D/E,G/S/T); AA other (Cys/Met/Lys/Arg/Pro); Biosynthesis Of Amino Acids; Nitrogen disposal	True	True
r1418m	CA5A	-0.5659	-0.9434	0.2027	Nitrogen Metabolism	Nitrogen disposal	True	True
2HBt2	SLC16A3 or SLC16A7 or LOC416086 or SLC16A1	0.5163	-3	0.4125	Extracellular Transport	Extracellular Transport	False	True
HEX1	ADPGK or HK2 or HK1 or HK3 or GCK or ADPGK	0.1012	9.7622	0.1524	Glycolysis/Gluconeogenesis; Starch And Sucrose Metabolism	Central Energy Metabolism; Starch And Sucrose Metabolism	True	False
PROt4	SLC38A1 or SLC6A14 or SLC38A2 or SLC22A5 or (SLC6A19 and TMEM27) or (SLC6A19 and ACE2)	-0.1633	-3.0589	0.5265	Extracellular Transport	Extracellular Transport	True	False
3DSPHRr	KDSR	0.4582	3	0.0562	Sphingolipid Metabolism	Lipid metabolism	True	False
FBA	ALDOC or ALDOB	0.2989	3	0.088	Pentose Phosphate Pathway	Redox & Pentose Metabolism	True	False
HUMANGEM_MAR04951	AQP9	0.1292	3	0.7764	Transport, Mitochondrial	Mitochondrial transport	True	False
HUMANGEM_MAR20136	SLC25A36	0.3457	3	0.4268	Transport, Mitochondrial	Mitochondrial transport	True	False
ORNTArm	OAT	0.3448	3	0.3822	Arginine And Proline Metabolism; Urea Cycle	AA other (Cys/Met/Lys/Arg/Pro); Nitrogen disposal	True	False
PFK	PFKP or (PFKP and PFKL) or (PFKP and PFKM) or PFKM or PFKL or (PFKL and PFKM)	0.4284	3	0.3386	Glycolysis/Gluconeogenesis	Central Energy Metabolism	True	False
PSSA1r_hs	PTDSS1	0.3882	3	0.1166	Glycerophospholipid Metabolism	Lipid metabolism	True	False
SERPT	SGMS1	-0.3337	-3	0.2821	Sphingolipid Metabolism	Lipid metabolism	True	False
THRD__L	SRRL or SDSL	-0.1	-3	0.6142	Alanine, Aspartate And Glutamate Metabolism; Biosynthesis Of Amino Acids; Glycine, Serine And Threonine Metabolism; Valine, Leucine And Isoleucine Biosynthesis	AA central (A/D/E,G/S/T); Biosynthesis Of Amino Acids; BCAA metabolism (Val/Leu/Iso)	True	False
r0074	ALDH4A1	0.4451	3	0.0129	Arginine And Proline Metabolism; Urea Cycle	AA other (Cys/Met/Lys/Arg/Pro); Nitrogen disposal	True	False
HUMANGEM_MAR20139	SLC25A36	0.3457	0.546	0.4268	Transport, Mitochondrial	Mitochondrial transport	True	False
PSSA1_hs	PTDSS1	0.3882	0.546	0.1166	Glycerophospholipid Metabolism	Lipid metabolism	True	False
THRt4	SLC38A1 or SLC6A14 or SLC38A2 or SLC22A5 or (SLC6A19 and TMEM27) or (SLC6A19 and ACE2)	-0.1633	-0.304	0.5265	Extracellular Transport	Extracellular Transport	True	False
3HKYNAKGAT	KYAT3	0.1773	0.1506	0.5535	Tryptophan Metabolism	AAA metabolism (Trp/Phe/Tyr)	True	False
ADK1	AK1 or AK7 or AK8 or AK5	4.2536	0.1506	0.0097	Nucleotide Interconversion; Nucleotide Metabolism; Purine Metabolism	Nucleotide metabolism; Nitrogen disposal	True	False
ADKd	AK5	0.6028	0.1506	0.5059	Nucleotide Interconversion	Nucleotide metabolism	True	False
ADSS	ADSS2 or ADSS1	1.2066	0.1506	0.0747	Alanine, Aspartate And Glutamate Metabolism; Nucleotide Interconversion; Nucleotide Metabolism; Purine Metabolism	AA central (A/D/E,G/S/T); Nucleotide metabolism; Nitrogen disposal	True	False
AGPAT1	AGPAT2 or GPAT4 or AGPAT4 or AGPAT3 or AGPAT5 or AGPAT1 or MBOAT2	2.5558	0.1506	0.0526	Triacylglycerol Synthesis	Lipid metabolism	True	False
AIRCr	PAICS	0.3061	0.1506	0.4704	Purine Metabolism; Purine Synthesis	Nitrogen disposal; Nucleotide metabolism	True	False
ASNtN1	SLC38A3	0.1612	0.1506	0.5518	Extracellular Transport	Extracellular Transport	True	False
CDS	CDS1 or CDS2	1.7965	0.1506	0.0028	Glycerophospholipid Metabolism	Lipid metabolism	True	False
CHLPCTD	PCYT1A or PCYT1B	1.7618	0.1506	0.3301	Glycerophospholipid Metabolism	Lipid metabolism	True	False
CHOLtu	LOC421583 or SLC22A1 or SLC22A5	1.3815	0.1506	0.1789	Extracellular Transport	Extracellular Transport	True	False
CLSm_hs	CRLS1	0.2662	0.1506	0.3921	Glycerophospholipid Metabolism	Lipid metabolism	True	False
CTPS2	CTPS1 or CTPS2	0.2565	0.1506	0.3661	Nucleotide Metabolism; Pyrimidine Metabolism; Pyrimidine Synthesis	Nucleotide metabolism	True	False
CYTDK1	UCK2 or UCK1	0.3881	0.1506	0.1684	Nucleotide Interconversion; Nucleotide Metabolism; Pyrimidine Metabolism	Nucleotide metabolism	True	False
CYTDt	SLC29A1 or SLC29A3	0.2178	0.1506	0.6676	Extracellular Transport	Extracellular Transport	True	False
DAGK_hs	DGKI or DGKZ or DGKD or DGKH or DGKE or DGKQ or DGKK or DGKE or DGKI	1.8932	0.1506	0.0275	Glycerophospholipid Metabolism	Lipid metabolism	True	False
DCMPDA	DCTD	0.1442	0.1506	0.7265	Pyrimidine Catabolism	Nucleotide metabolism	True	False
DGAT	DGAT2	0.3702	0.1506	0.5426	Triacylglycerol Synthesis	Lipid metabolism	True	False
DGK1	GUK1	0.0703	0.1506	0.8672	Nucleotide Interconversion	Nucleotide metabolism	True	False
DNDPt14m	SLC25A19	0.339	0.1506	0.2113	Transport, Mitochondrial	Mitochondrial transport	True	False
DURIK1	TK1	0.0995	0.1506	0.8914	Nucleotide Interconversion	Nucleotide metabolism	True	False
DURIPP	PNP or UPP2	0.2791	0.1506	0.6748	Nucleotide Interconversion	Nucleotide metabolism	True	False
DUTPDPm	DUT or ITPA	0.2227	0.1506	0.6288	Nucleotide Interconversion	Nucleotide metabolism	True	False
FAS100COA	FASN or (FASN and ELOVL6 and ELOVL5 and ELOVL2)	0.7737	0.1506	0.1956	Fatty Acid Biosynthesis	Lipid metabolism	True	False
FAS120COA	FASN or (FASN and ELOVL6 and ELOVL5 and ELOVL2)	0.7737	0.1506	0.1956	Fatty Acid Biosynthesis	Lipid metabolism	True	False
FAS140COA	FASN or (FASN and ELOVL6 and ELOVL5 and ELOVL2)	0.7737	0.1506	0.1956	Fatty Acid Biosynthesis	Lipid metabolism	True	False
FAS160COA	FASN or (FASN and ELOVL6 and ELOVL5 and ELOVL2)	0.7737	0.1506	0.1956	Fatty Acid Biosynthesis	Lipid metabolism	True	False
FAS80COA__L	FASN	0.7737	0.1506	0.1212	Fatty Acid Biosynthesis	Lipid metabolism	True	False
FKYNH	AFMID	0.6543	0.1506	0.0477	Tryptophan Metabolism	AAA metabolism (Trp/Phe/Tyr)	True	False
FTHFL	MTHFD1	0.4444	0.1506	0.2727	Folate Metabolism	Folate Metabolism	True	False
FUM	FH	0.5923	0.1506	0.0099	Citric Acid Cycle; Pyruvate Metabolism	Central Energy Metabolism	True	False
GALU	UGP2	0.5107	0.1506	0.0518	Pentose And Glucuronate Interconversions	Redox & Pentose Metabolism	True	False
GARFT	GART or GART-B	0.1348	0.1506	0.7153	Folate Metabolism; Purine Metabolism; Purine Synthesis	Folate Metabolism; Nitrogen disposal; Nucleotide metabolism	True	False
GHMT2rm	SHMT1	0.7302	0.1506	0.0123	Alanine, Aspartate And Glutamate Metabolism; Biosynthesis Of Amino Acids; Cyanoamino Acid Metabolism; Folate Metabolism; Glycine, Serine And Threonine Metabolism; Glyoxylate And Dicarboxylate Metabolism; Methane Metabolism	AA central (A/D/E,G/S/T); Biosynthesis Of Amino Acids; Cyanoamino Acid Metabolism; Folate Metabolism; Glyoxylate And Dicarboxylate Metabolism; Methane Metabolism	True	False
GK1	GUK1	0.0703	0.1506	0.8672	Nucleotide Interconversion; Nucleotide Metabolism; Purine Metabolism	Nucleotide metabolism; Nitrogen disposal	True	False
GLUPRT	PPAT	0.5299	0.1506	0.1841	Alanine, Aspartate And Glutamate Metabolism; Purine Metabolism; Purine Synthesis	AA central (A/D/E,G/S/T); Nitrogen disposal; Nucleotide metabolism	True	False
HIStN1	SLC38A3	0.1612	0.1506	0.5518	Extracellular Transport	Extracellular Transport	True	False
HUMANGEM_MAR20145	SLC25A36	0.3457	0.1506	0.4268	Transport, Mitochondrial	Mitochondrial transport	True	False
HUMANGEM_MAR20147	SLC25A36	0.3457	0.1506	0.4268	Transport, Mitochondrial	Mitochondrial transport	True	False
HUMANGEM_MAR20148	SLC25A36	0.3457	0.1506	0.4268	Transport, Mitochondrial	Mitochondrial transport	True	False
NDPK1	NME3 or NME2 or NME6 or NME7 or (NME2 and NME1) or PKLR	0.1662	0.1506	0.0724	Nucleotide Interconversion; Nucleotide Metabolism; Purine Metabolism	Nucleotide metabolism; Nitrogen disposal	True	False
NDPK4n	NT5C2 or NT5C1B or NT5C1A or LOC770392 or NT5C3B or NT5DC4 or NT5C3A	0.7975	0.1506	0.0873	Nucleotide Interconversion; Nucleotide Metabolism; Pyrimidine Metabolism	Nucleotide metabolism	True	False
NDPK8	NME3 or NME2 or NME6 or NME7 or (NME2 and NME1) or PKLR	0.1662	0.1506	0.0724	Nucleotide Interconversion; Nucleotide Metabolism; Purine Metabolism	Nucleotide metabolism; Nitrogen disposal	True	False
NTD2	NT5C2 or NT5C1B or NT5C1A or LOC770392 or NT5C3B or NT5DC4	0.7975	0.1506	0.0758	Nucleotide Metabolism; Pyrimidine Catabolism; Pyrimidine Metabolism	Nucleotide metabolism	True	False
NTD7	NT5C2 or NT5C1B or NT5C1A or LOC770392 or NT5C3B or NT5DC4	0.7975	0.1506	0.0758	Nucleotide Interconversion; Nucleotide Metabolism; Purine Metabolism	Nucleotide metabolism; Nitrogen disposal	True	False
NTD8	NT5C2 or NT5C1B or NT5C1A or LOC770392 or NT5C3B or NT5DC4	0.7975	0.1506	0.0758	Nucleotide Interconversion; Nucleotide Metabolism; Purine Metabolism	Nucleotide metabolism; Nitrogen disposal	True	False
PGMT	PGM1 or PGM2	0.5556	0.1506	0.0105	Glycolysis/Gluconeogenesis	Central Energy Metabolism	True	False
PHEt4	SLC38A2 or SLC7A3 or SLC6A14 or SLC7A2 or LACAAT2L or SLC38A1 or SLC7A1 or SLC38A4 or (SLC6A19 and (TMEM27 or ACE2))	0.0814	0.1506	0.5989	Extracellular Transport	Extracellular Transport	True	False
PPAm	PPA2 or LHPP or PPA1	0.6268	0.1506	0.0226	Oxidative Phosphorylation	Oxidative Phosphorylation	True	False
PRAGSr	GART or GART-B	0.1348	0.1506	0.7153	Purine Metabolism; Purine Synthesis	Nitrogen disposal; Nucleotide metabolism	True	False
PRASCS	PAICS	0.3061	0.1506	0.4704	Purine Metabolism; Purine Synthesis	Nitrogen disposal; Nucleotide metabolism	True	False
PSERT	PSAT1	0.8784	0.1506	0.0144	Alanine, Aspartate And Glutamate Metabolism; Biosynthesis Of Amino Acids; Cysteine And Methionine Metabolism; Glycine, Serine And Threonine Metabolism; Methane Metabolism	AA central (A/D/E,G/S/T); Biosynthesis Of Amino Acids; AA other (Cys/Met/Lys/Arg/Pro); Methane Metabolism	True	False
PSFLIP	ATP8A1 or ATP10A	1.1517	0.1506	0.0174	Extracellular Transport	Extracellular Transport	True	False
PYNP2r	UPP2	0.2791	0.1506	0.6748	Nucleotide Metabolism; Pyrimidine Catabolism; Pyrimidine Metabolism	Nucleotide metabolism	True	False
RE0452M	DTYMK	2.3124	0.1506	0.0011	Pyrimidine Synthesis	Nucleotide metabolism	True	False
RPI	RPIA	0.0888	0.1506	0.8054	Biosynthesis Of Amino Acids; Pentose Phosphate Pathway	Biosynthesis Of Amino Acids; Redox & Pentose Metabolism	True	False
TRPO2	TDO2 or IDO2	0.4664	0.1506	0.4576	Tryptophan Metabolism	AAA metabolism (Trp/Phe/Tyr)	True	False
TRPt	SLC36A4 or SLC16A10	1.0867	0.1506	0.0005	Extracellular Transport	Extracellular Transport	True	False
URIDK2	DTYMK	2.3124	0.1506	0.0011	Nucleotide Interconversion; Nucleotide Metabolism; Pyrimidine Metabolism	Nucleotide metabolism	True	False
r0226	DHFR	0.3458	0.1506	0.2	Folate Metabolism	Folate Metabolism	True	False
r0295	AMT	0.4337	0.1506	0.2355	Alanine, Aspartate And Glutamate Metabolism; Folate Metabolism; Glycine, Serine And Threonine Metabolism; Glyoxylate And Dicarboxylate Metabolism	AA central (A/D/E,G/S/T); Folate Metabolism; Glyoxylate And Dicarboxylate Metabolism	True	False
r0531	UCK2 or UCK1 or UCKL1 or LOC776992	1.0826	0.1506	0.1432	Nucleotide Interconversion	Nucleotide metabolism	True	False
r0666	GART or GART-B	0.1348	0.1506	0.7153	Purine Synthesis	Nucleotide metabolism	True	False
GUAPRT	HPRT1 or LOC769866 or APRT	0.224	0.111	0.0106	Nucleotide Metabolism; Nucleotide Salvage Pathway; Purine Metabolism	Nucleotide metabolism; Nucleotide Salvage Pathway; Nitrogen disposal	True	False
PPM	PGM1 or PGM2	0.5556	0.111	0.0105	Pentose Phosphate Pathway; Purine Metabolism	Redox & Pentose Metabolism; Nitrogen disposal	True	False
ATPS4m	NDUFS2 and NDUFA13 and NDUFB7 and NDUFS4 and NDUFC2 and NDUFB6 and NDUFB10 and NDUFAB1 and NDUFA8 and NDUFA5 and NDUFA12 and NDUFB2 and NDUFV3 and NDUFA9 and NDUFA7 and NDUFB9 and NDUFS6 and NDUFS3 and NDUFB1 and NDUFB8 and NDUFA10 and NDUFB3 and NDUFS1 and NDUFB5 and NDUFV2 and NDUFA6 and NDUFV1 and NDUFA2 and NDUFS8 and NDUFB4 and NDUFS7 and NDUFS5 and NDUFA4 and NDUFA1 and NDUFA11 and ND1 and …	-0.7589	-0.1047		Oxidative Phosphorylation	Oxidative Phosphorylation	True	False
r1418c	CA13 or CA4 or CA3A or CA3B or CA8 or LOC421187	0.712	0.0841	0.4987	Nitrogen Metabolism	Nitrogen disposal	True	False
FOLt2	SLC19A1	-0.3434	-0.074	0.1713	Extracellular Transport	Extracellular Transport	True	False
CYOOm3	COX5B and COX4I1 and COX6A1 and COX6C and COX7A2L and COX7C and COX5A and COX7B and COX7A2 and COX8A and COX2 and COX3 and COX1	-0.3782	-0.0589		Oxidative Phosphorylation	Oxidative Phosphorylation	True	False
CYOR_u10m	UQCRFS1 and UQCRC1 and UQCRQ and UQCRB and UQCRC2 and UQCR11 and UQCR10 and UQCRHL and CYTB	-0.6343	-0.0589		Oxidative Phosphorylation	Oxidative Phosphorylation	True	False
NADH2_u10m	NDUFS2 and NDUFA13 and NDUFB7 and NDUFS4 and NDUFC2 and NDUFB6 and NDUFB10 and NDUFAB1 and NDUFA8 and NDUFA5 and NDUFA12 and NDUFB2 and NDUFV3 and NDUFA9 and NDUFA7 and NDUFB9 and NDUFS6 and NDUFS3 and NDUFB1 and NDUFB8 and NDUFA10 and NDUFB3 and NDUFS1 and NDUFB5 and NDUFV2 and NDUFA6 and NDUFV1 and NDUFA2 and NDUFS8 and NDUFB4 and NDUFS7 and NDUFS5 and NDUFA4 and NDUFA1 and NDUFA11 and ND1 and …	-0.7589	-0.0589		Oxidative Phosphorylation	Oxidative Phosphorylation	True	False
G6PDH2r	IDH1 or PGD	0.016	0.0566	0.4796	Pentose Phosphate Pathway	Redox & Pentose Metabolism	True	False
ACONTm	ACO2 or ACO1	-0.0995	-0.0439	0.7283	2-oxocarboxylic Acid Metabolism; Biosynthesis Of Amino Acids; Citric Acid Cycle	2-oxocarboxylic Acid Metabolism; Biosynthesis Of Amino Acids; Central Energy Metabolism	True	False
AKGDm	OGDH and DLD and PDHX and DLST	-0.0796	-0.0439	0.8824	2-oxocarboxylic Acid Metabolism; Citric Acid Cycle	2-oxocarboxylic Acid Metabolism; Central Energy Metabolism	True	False
NDPK1m	NME4 or NME6 or NME1	-0.1434	-0.0439	0.0973	Nucleotide Interconversion; Nucleotide Metabolism; Purine Metabolism	Nucleotide metabolism; Nitrogen disposal	True	False
2OXOADOXm	DLST	-0.0451	-0.0291	0.8824	2-oxocarboxylic Acid Metabolism; Lysine Metabolism; Tryptophan Metabolism	2-oxocarboxylic Acid Metabolism; AA other (Cys/Met/Lys/Arg/Pro); AAA metabolism (Trp/Phe/Tyr)	True	False
ECOAH12m	HADHA and EHHADH and ECHS1	-0.3975	-0.0291	0.9998	Valine, Leucine And Isoleucine Biosynthesis; Valine, Leucine And Isoleucine Degradation	BCAA metabolism (Val/Leu/Iso)	True	False
ECOAH1m	HADHA and ECHS1	-0.3975	-0.0291	0.9998	Butanoate Metabolism; Fatty Acid Degradation; Fatty Acid Metabolism; Lysine Degradation; Tryptophan Metabolism	Butanoate Metabolism; Lipid metabolism; AA other (Cys/Met/Lys/Arg/Pro); AAA metabolism (Trp/Phe/Tyr)	True	False
r0385	BCKDHA and BCKDHB	-0.0666	-0.0291	0.7917	Valine, Leucine And Isoleucine Biosynthesis	BCAA metabolism (Val/Leu/Iso)	True	False
r0560	ACADS	-0.1879	-0.0291	0.5019	Valine, Leucine And Isoleucine Biosynthesis	BCAA metabolism (Val/Leu/Iso)	True	False
r0561	DBT	-0.0702	-0.0291	0.7802	Valine, Leucine And Isoleucine Biosynthesis	BCAA metabolism (Val/Leu/Iso)	True	False
AKGMALtm	SLC25A11 or SLC25A10	0.1198	0.0286	0.7163	Transport, Mitochondrial	Mitochondrial transport	True	False
ATPtm	SLC25A4 or SLC25A6 or SLC25A5	0.3386	0.0286	0.0946	Transport, Mitochondrial	Mitochondrial transport	True	False
MALtm	SLC25A10	0.1198	0.0286	0.7163	Transport, Mitochondrial	Mitochondrial transport	True	False
PHETA1	GOT1	0.3373	0.0286	0.1131	2-oxocarboxylic Acid Metabolism; Biosynthesis Of Amino Acids; Phenylalanine Metabolism; Phenylalanine, Tyrosine And Tryptophan Biosynthesis	2-oxocarboxylic Acid Metabolism; Biosynthesis Of Amino Acids; AAA metabolism (Trp/Phe/Tyr)	True	False
PHETA1m	TAT or GOT2	0.0582	0.0286	0.9168	2-oxocarboxylic Acid Metabolism; Biosynthesis Of Amino Acids; Phenylalanine Metabolism; Phenylalanine, Tyrosine And Tryptophan Biosynthesis	2-oxocarboxylic Acid Metabolism; Biosynthesis Of Amino Acids; AAA metabolism (Trp/Phe/Tyr)	True	False
ECOAH9m	HADHA and EHHADH and ECHS1	-0.3975	-0.0145	0.9998	Valine, Leucine And Isoleucine Biosynthesis; Valine, Leucine And Isoleucine Degradation	BCAA metabolism (Val/Leu/Iso)	True	False
PGM	BPGM or PGAM1	-0.6342	-0.0145	0.006	Biosynthesis Of Amino Acids; Glycine, Serine And Threonine Metabolism; Glycolysis/Gluconeogenesis; Methane Metabolism	Biosynthesis Of Amino Acids; AA central (A/D/E,G/S/T); Central Energy Metabolism; Methane Metabolism	True	False
TPI	TPI1	-0.5183	-0.0145	0.059	Glycolysis/Gluconeogenesis	Central Energy Metabolism	True	False
r0603	ACADS and LOC423987	-0.1879	-0.0145		Valine, Leucine And Isoleucine Biosynthesis	BCAA metabolism (Val/Leu/Iso)	True	False
r0604	DBT	-0.0702	-0.0145	0.7802	Valine, Leucine And Isoleucine Biosynthesis	BCAA metabolism (Val/Leu/Iso)	True	False
r0670	BCKDHA and BCKDHB	-0.0666	-0.0145	0.7917	Valine, Leucine And Isoleucine Biosynthesis	BCAA metabolism (Val/Leu/Iso)	True	False
ALATA__L	GPT2	1.4551	0.0144	0.002	2-oxocarboxylic Acid Metabolism; Alanine, Aspartate And Glutamate Metabolism; Arginine Biosynthesis; Biosynthesis Of Amino Acids	2-oxocarboxylic Acid Metabolism; AA central (A/D/E,G/S/T); AA other (Cys/Met/Lys/Arg/Pro); Biosynthesis Of Amino Acids	True	False
GLUt2m	SLC25A12 or SLC25A22 or SLC25A13	0.4038	0.0144	0.2463	Transport, Mitochondrial	Mitochondrial transport	True	False
ARGLYSex	SLC7A6	-0.1254	3.3978	0.7446	Extracellular Transport	Extracellular Transport	False	False
3DSPHR	KDSR	0.4582	-3	0.0562	Sphingolipid Metabolism	Lipid metabolism	False	False
C160CPT1	CPT1A	-0.0558	3	0.905	Fatty Acid Degradation; Fatty Acid Metabolism	Lipid metabolism	False	False
G6PDH1rer	H6PD	-0.1241	3	0.7643	Pentose Phosphate Pathway	Redox & Pentose Metabolism	False	False
P5CDm	ALDH4A1	0.4451	-3	0.0129	Alanine, Aspartate And Glutamate Metabolism	AA central (A/D/E,G/S/T)	False	False
PGI	GPI	-0.0753	3	0.7318	Glycolysis/Gluconeogenesis	Central Energy Metabolism	False	False
PGLer	H6PD	-0.1241	3	0.7643	Pentose Phosphate Pathway	Redox & Pentose Metabolism	False	False
SERPTr	SPTLC1 and SPTLC2 and SPTLC3	-0.1287	3	0.5914	Sphingolipid Metabolism	Lipid metabolism	False	False
SMSr	LOC422929	0	3		Sphingolipid Metabolism	Lipid metabolism	False	False
r0434	CPT1A and CPT2	-0.0558	3	0.905	Fatty Acid Degradation; Fatty Acid Metabolism	Lipid metabolism	False	False
PCm	PC	0	-1		Biosynthesis Of Amino Acids; Citric Acid Cycle; Pyruvate Metabolism	Biosynthesis Of Amino Acids; Central Energy Metabolism	False	False
r0552	ALDH7A1	0.1784	-0.5995	0.4936	Alanine, Aspartate And Glutamate Metabolism; Folate Metabolism; Glycine, Serine And Threonine Metabolism	AA central (A/D/E,G/S/T); Folate Metabolism	False	False
r0553	ALDH7A1	0.1784	-0.5995	0.4936	Alanine, Aspartate And Glutamate Metabolism; Folate Metabolism; Glycine, Serine And Threonine Metabolism	AA central (A/D/E,G/S/T); Folate Metabolism	False	False
GLUt4	SLC38A3	0.1612	-0.3219	0.5518	Extracellular Transport	Extracellular Transport	False	False
ACACt2	SLC16A1 or SLC16A7 or LOC416086	0.3979	-0.152	0.3994	Extracellular Transport; Fatty Acid Degradation; Fatty Acid Elongation; Fatty Acid Metabolism	Extracellular Transport; Lipid metabolism; Fatty Acid Elongation	False	False
AACOAT	AACS	-0.2059	0.1506	0.4814	Butanoate Metabolism; Valine, Leucine And Isoleucine Degradation	Butanoate Metabolism; BCAA metabolism (Val/Leu/Iso)	False	False
ACACT1r	ACAT2	-0.3989	0.1506	0.2175	Butanoate Metabolism; Fatty Acid Degradation; Fatty Acid Metabolism; Glyoxylate And Dicarboxylate Metabolism; Lysine Degradation; Pyruvate Metabolism; Terpenoid Backbone Biosynthesis; Tryptophan Metabolism; Valine, Leucine And Isoleucine Degradation	Butanoate Metabolism; Lipid metabolism; Glyoxylate And Dicarboxylate Metabolism; AA other (Cys/Met/Lys/Arg/Pro); Central Energy Metabolism; Terpenoid Backbone Biosynthesis; AAA metabolism (Trp/Phe/Tyr); BCAA metabolism (Val/Leu/Iso)	False	False
ACCOAC	ACACA and ACACB	-0.2153	0.1506	0.605	Fatty Acid Biosynthesis; Fatty Acid Degradation; Fatty Acid Metabolism; Propanoate Metabolism; Pyruvate Metabolism	Lipid metabolism; Propanoate Metabolism; Central Energy Metabolism	False	False
ADSL1	ADSL	-0.2101	0.1506	0.6256	Alanine, Aspartate And Glutamate Metabolism; Nucleotide Interconversion; Nucleotide Metabolism; Purine Metabolism	AA central (A/D/E,G/S/T); Nucleotide metabolism; Nitrogen disposal	False	False
ADSL2	ADSL	-0.2101	0.1506	0.6256	Purine Metabolism; Purine Synthesis	Nitrogen disposal; Nucleotide metabolism	False	False
AICART	ATIC	-0.5286	0.1506	0.1096	Folate Metabolism; Purine Metabolism; Purine Synthesis	Folate Metabolism; Nitrogen disposal; Nucleotide metabolism	False	False
ASPCTr	CAD	-1.1619	0.1506	0.0056	Alanine, Aspartate And Glutamate Metabolism; Pyrimidine Metabolism; Pyrimidine Synthesis	AA central (A/D/E,G/S/T); Nucleotide metabolism	False	False
CEPTC	CEPT1 or CHPT1	-0.0557	0.1506	0.102	Glycerophospholipid Metabolism	Lipid metabolism	False	False
CHOLESTle	LIPA	-0.2112	0.1506	0.5487	Extracellular Transport	Extracellular Transport	False	False
CHOLK	CHKA	-0.5216	0.1506	0.1233	Glycerophospholipid Metabolism	Lipid metabolism	False	False
CYSt4	SLC6A14 or SLC38A2 or (SLC6A19 and TMEM27) or (SLC6A19 and ACE2)	-0.1995	0.1506	0.5806	Extracellular Transport	Extracellular Transport	False	False
CYTDe	CDA	-0.0683	0.1506	0.8585	Pyrimidine Catabolism	Nucleotide metabolism	False	False
CYTK1	CMPK1	-0.4578	0.1506	0.0437	Nucleotide Interconversion; Nucleotide Metabolism; Pyrimidine Metabolism	Nucleotide metabolism	False	False
CYTK12	CMPK1	-0.4578	0.1506	0.0437	Nucleotide Interconversion	Nucleotide metabolism	False	False
CYTK1m	CMPK2	-0.9745	0.1506	0.08	Nucleotide Interconversion; Nucleotide Metabolism; Pyrimidine Metabolism	Nucleotide metabolism	False	False
DHORD9	DHODH	-0.3066	0.1506	0.6536	Transport, Mitochondrial	Mitochondrial transport	False	False
DHORTS	CAD	-1.1619	0.1506	0.0056	Pyrimidine Synthesis	Nucleotide metabolism	False	False
GND	PGD	-0.497	0.1506	0.3185	Glutathione Metabolism; Pentose Phosphate Pathway	Redox & Pentose Metabolism	False	False
GPAM_hs	AGPAT5L	0	0.1506		Triacylglycerol Synthesis	Lipid metabolism	False	False
IMPC	ATIC	-0.5286	0.1506	0.1096	Purine Metabolism; Purine Synthesis	Nitrogen disposal; Nucleotide metabolism	False	False
INSTt4_2	SLC5A11	-0.3485	0.1506	0.5827	Extracellular Transport	Extracellular Transport	False	False
KYN3OX	KMO	-0.0351	0.1506	0.9395	Tryptophan Metabolism	AAA metabolism (Trp/Phe/Tyr)	False	False
LPASE	PLA2G4A	-0.9036	0.1506	0.1973	Glycerophospholipid Metabolism	Lipid metabolism	False	False
METt4	SLC38A1 or SLC6A14 or SLC38A2 or SLC22A5 or (SLC6A19 and TMEM27) or (SLC6A19 and ACE2)	-0.1633	0.1506	0.5265	Extracellular Transport	Extracellular Transport	False	False
NDPK10	NME3 or NME2 or NME6 or NME7 or (NME2 and NME1)	-0.4414	0.1506	0.0612	Nucleotide Interconversion; Nucleotide Metabolism; Purine Metabolism	Nucleotide metabolism; Nitrogen disposal	False	False
NDPK10n	NME2 and NME1	-0.5702	0.1506	0.6497	Nucleotide Interconversion; Nucleotide Metabolism; Purine Metabolism	Nucleotide metabolism; Nitrogen disposal	False	False
NDPK3m	NME4 or NME6 or NME1	-0.1434	0.1506	0.0973	Nucleotide Interconversion; Nucleotide Metabolism; Pyrimidine Metabolism	Nucleotide metabolism	False	False
NDPK5	NME3 or (NME2 and NME1) or NME6 or NME7 or NME2	-0.4414	0.1506	0.0612	Nucleotide Interconversion; Nucleotide Metabolism; Purine Metabolism	Nucleotide metabolism; Nitrogen disposal	False	False
NDPK6m	NME1 and NME2	-0.5702	0.1506	0.6497	Nucleotide Interconversion; Nucleotide Metabolism; Pyrimidine Metabolism	Nucleotide metabolism	False	False
NDPK8m	NME4 or NME6 or NME1	-0.1434	0.1506	0.0973	Nucleotide Interconversion; Nucleotide Metabolism; Purine Metabolism	Nucleotide metabolism; Nitrogen disposal	False	False
OMPDC	UMPS	-0.4661	0.1506	0.1806	Pyrimidine Metabolism; Pyrimidine Synthesis	Nucleotide metabolism	False	False
ORPT	UMPS	-0.4661	0.1506	0.1806	Pyrimidine Metabolism; Pyrimidine Synthesis	Nucleotide metabolism	False	False
PCt	ABCB1LA or ABCA1	-0.1182	0.1506	0.6895	Extracellular Transport	Extracellular Transport	False	False
PGCD	PHGDH	-0.2959	0.1506	0.2881	Alanine, Aspartate And Glutamate Metabolism; Biosynthesis Of Amino Acids; Cysteine And Methionine Metabolism; Glycine, Serine And Threonine Metabolism; Methane Metabolism	AA central (A/D/E,G/S/T); Biosynthesis Of Amino Acids; AA other (Cys/Met/Lys/Arg/Pro); Methane Metabolism	False	False
PGPPTm	PGS1	-0.368	0.1506	0.3284	Glycerophospholipid Metabolism	Lipid metabolism	False	False
PRFGS	PFAS	0	0.1506		Purine Metabolism; Purine Synthesis	Nitrogen disposal; Nucleotide metabolism	False	False
PSDm_hs	PISD	-0.3091	0.1506	0.0818	Glycerophospholipid Metabolism	Lipid metabolism	False	False
PSP__Lm	PSPH	-0.3451	0.1506	0.4546	Alanine, Aspartate And Glutamate Metabolism; Glycine, Serine And Threonine Metabolism	AA central (A/D/E,G/S/T)	False	False
PUNP1	PNP	0	0.1506		Nucleotide Interconversion; Nucleotide Metabolism; Purine Metabolism	Nucleotide metabolism; Nitrogen disposal	False	False
PUNP2	PNP	0	0.1506		Nucleotide Metabolism; Purine Catabolism; Purine Metabolism	Nucleotide metabolism; Purine Catabolism; Nitrogen disposal	False	False
PUNP4	PNP	0	0.1506		Nucleotide Metabolism; Purine Catabolism; Purine Metabolism	Nucleotide metabolism; Purine Catabolism; Nitrogen disposal	False	False
RNDR2	(RRM1 and RRM2) or RRM2B	-0.3956	0.1506	0.3049	Nucleotide Interconversion	Nucleotide metabolism	False	False
RNDR3	(RRM1 and RRM2) or RRM2B	-0.3956	0.1506	0.3049	Nucleotide Interconversion	Nucleotide metabolism	False	False
SERt4	SLC38A1 or SLC6A14 or SLC38A2 or SLC22A5 or (SLC6A19 and TMEM27) or (SLC6A19 and ACE2)	-0.1633	0.1506	0.5265	Extracellular Transport	Extracellular Transport	False	False
TMDSm	TYMS	-0.0508	0.1506	0.9227	Nucleotide Interconversion	Nucleotide metabolism	False	False
TRDR	TXNRD1	-0.3147	0.1506	0.4196	Nucleotide Interconversion	Nucleotide metabolism	False	False
TYRPHELAT2tc	SLC7A5	-0.6438	0.1506	0.0739	Extracellular Transport	Extracellular Transport	False	False
UMPK2m	CMPK2	-0.9745	0.1506	0.08	Nucleotide Interconversion	Nucleotide metabolism	False	False
URIt5	SLC28A3	0	0.1506		Extracellular Transport	Extracellular Transport	False	False
r0202c	GPD1L2	-0.0504	0.1506	0.8499	Glycerophospholipid Metabolism	Lipid metabolism	False	False
r0276	GMPR2	-0.2802	0.1506	0.1941	Nucleotide Metabolism; Purine Catabolism; Purine Metabolism	Nucleotide metabolism; Purine Catabolism; Nitrogen disposal	False	False
r0475	RRM1 and RRM2 and RRM2B	-0.4616	0.1506	0.8366	Nucleotide Interconversion	Nucleotide metabolism	False	False
PRPPS	PRPS1L1 or PRPS2	-0.075	0.1243	0.5331	Biosynthesis Of Amino Acids; Pentose Phosphate Pathway; Purine Metabolism	Biosynthesis Of Amino Acids; Redox & Pentose Metabolism; Nitrogen disposal	False	False
ALAPAT4te	SLC36A4	0	0.0976		Extracellular Transport	Extracellular Transport	False	False
5MTHFt	FOLR1	0	-0.074		Extracellular Transport	Extracellular Transport	False	False
ALAtN1	SLC38A3	0.1612	-0.0589	0.5518	Extracellular Transport	Extracellular Transport	False	False
PGL	H6PD	-0.1241	0.0566	0.7643	Pentose Phosphate Pathway	Redox & Pentose Metabolism	False	False
ASPTA	GOT1 or IL4I1	0.3373	-0.0439	0.1586	2-oxocarboxylic Acid Metabolism; Alanine, Aspartate And Glutamate Metabolism; Arginine Biosynthesis; Biosynthesis Of Amino Acids	2-oxocarboxylic Acid Metabolism; AA central (A/D/E,G/S/T); AA other (Cys/Met/Lys/Arg/Pro); Biosynthesis Of Amino Acids	False	False
CSm	CS	1.3506	-0.0439	0	2-oxocarboxylic Acid Metabolism; Biosynthesis Of Amino Acids; Citric Acid Cycle; Glyoxylate And Dicarboxylate Metabolism	2-oxocarboxylic Acid Metabolism; Biosynthesis Of Amino Acids; Central Energy Metabolism; Glyoxylate And Dicarboxylate Metabolism	False	False
FUMm	FH	0.5923	-0.0439	0.0099	Citric Acid Cycle; Pyruvate Metabolism	Central Energy Metabolism	False	False
ICDHym	IDH2	0.7389	-0.0439	0.002	2-oxocarboxylic Acid Metabolism; Biosynthesis Of Amino Acids; Citric Acid Cycle; Glutathione Metabolism	2-oxocarboxylic Acid Metabolism; Biosynthesis Of Amino Acids; Central Energy Metabolism; Redox & Pentose Metabolism	False	False
MDH	MDH2 or MDH1	0.2033	-0.0439	0.6275	Citric Acid Cycle; Glyoxylate And Dicarboxylate Metabolism; Methane Metabolism; Pyruvate Metabolism	Central Energy Metabolism; Glyoxylate And Dicarboxylate Metabolism; Methane Metabolism	False	False
ME2m	ME1 or ME3	0.1973	-0.0439	0.3322	Pyruvate Metabolism	Central Energy Metabolism	False	False
SUCOAS1m	SUCLG2 and SUCLG1	0.0314	-0.0439	0.9057	Citric Acid Cycle; Propanoate Metabolism	Central Energy Metabolism; Propanoate Metabolism	False	False
r0509	SDHA and SDHB and SDHC and SDHD	0.1026	-0.0439	0.5944	Citric Acid Cycle	Central Energy Metabolism	False	False
r0552m	ALDH7A1	0.1784	-0.0439	0.4936	Alanine, Aspartate And Glutamate Metabolism; Glycine, Serine And Threonine Metabolism	AA central (A/D/E,G/S/T)	False	False
r0553m	ALDH7A1	0.1784	-0.0439	0.4936	Alanine, Aspartate And Glutamate Metabolism; Glycine, Serine And Threonine Metabolism	AA central (A/D/E,G/S/T)	False	False
3HBCOAHLm	HIBCH	0.3367	-0.0291	0.3829	Valine, Leucine And Isoleucine Biosynthesis; Valine, Leucine And Isoleucine Degradation	BCAA metabolism (Val/Leu/Iso)	False	False
GCC2cm	DLD	0.2331	-0.0291	0.3944	Glycolysis/Gluconeogenesis	Central Energy Metabolism	False	False
HACD1m	XRN1 or HADH	0.1518	-0.0291	0.3973	Butanoate Metabolism; Fatty Acid Degradation; Fatty Acid Metabolism; Lysine Degradation; Tryptophan Metabolism	Butanoate Metabolism; Lipid metabolism; AA other (Cys/Met/Lys/Arg/Pro); AAA metabolism (Trp/Phe/Tyr)	False	False
HIBDm	HIBADH or EHHADH or HADH	0.3207	-0.0291	0.3237	Valine, Leucine And Isoleucine Biosynthesis	BCAA metabolism (Val/Leu/Iso)	False	False
HMGCOASim	HMGCS2	0.3916	-0.0291	0.1171	Butanoate Metabolism; Synthesis And Degradation Of Ketone Bodies; Terpenoid Backbone Biosynthesis; Valine, Leucine And Isoleucine Degradation	Butanoate Metabolism; Lipid metabolism; Terpenoid Backbone Biosynthesis; BCAA metabolism (Val/Leu/Iso)	False	False
HMGLm	HMGCL or HMGCLL1	0.7802	-0.0291	0.1374	Butanoate Metabolism; Cholesterol Metabolism; Valine, Leucine And Isoleucine Degradation	Butanoate Metabolism; Lipid metabolism; BCAA metabolism (Val/Leu/Iso)	False	False
LYStm	SLC25A15	0.8624	-0.0291	0.1591	Transport, Mitochondrial	Mitochondrial transport	False	False
MMEm	MCEE	0.2495	-0.0291	0.76	Glyoxylate And Dicarboxylate Metabolism; Propanoate Metabolism; Valine, Leucine And Isoleucine Biosynthesis; Valine, Leucine And Isoleucine Degradation	Glyoxylate And Dicarboxylate Metabolism; Propanoate Metabolism; BCAA metabolism (Val/Leu/Iso)	False	False
MMMm	MUT	0.1313	-0.0291	0.7617	Glyoxylate And Dicarboxylate Metabolism; Propanoate Metabolism; Valine, Leucine And Isoleucine Biosynthesis; Valine, Leucine And Isoleucine Degradation	Glyoxylate And Dicarboxylate Metabolism; Propanoate Metabolism; BCAA metabolism (Val/Leu/Iso)	False	False
MMSAD1m	ALDH6A1	0.9273	-0.0291	0.0001	Valine, Leucine And Isoleucine Biosynthesis; Valine, Leucine And Isoleucine Degradation	BCAA metabolism (Val/Leu/Iso)	False	False
PPCOACm	PCCB and PCCA	0.349	-0.0291	0.0954	Glyoxylate And Dicarboxylate Metabolism; Propanoate Metabolism; Valine, Leucine And Isoleucine Biosynthesis; Valine, Leucine And Isoleucine Degradation	Glyoxylate And Dicarboxylate Metabolism; Propanoate Metabolism; BCAA metabolism (Val/Leu/Iso)	False	False
SACCD3m	AASS	0.6274	-0.0291	0.021	Lysine Degradation; Lysine Metabolism	AA other (Cys/Met/Lys/Arg/Pro)	False	False
VALTA	BCAT1	0.2996	-0.0291	0.6024	2-oxocarboxylic Acid Metabolism; Biosynthesis Of Amino Acids; Pantothenate And Coa Biosynthesis; Valine, Leucine And Isoleucine Biosynthesis; Valine, Leucine And Isoleucine Degradation	2-oxocarboxylic Acid Metabolism; Biosynthesis Of Amino Acids; Pantothenate And Coa Biosynthesis; BCAA metabolism (Val/Leu/Iso)	False	False
r0450	AADAT	0.1913	-0.0291	0.6562	2-oxocarboxylic Acid Metabolism; Biosynthesis Of Amino Acids; Lysine Biosynthesis; Lysine Degradation; Lysine Metabolism	2-oxocarboxylic Acid Metabolism; Biosynthesis Of Amino Acids; Lysine Biosynthesis; AA other (Cys/Met/Lys/Arg/Pro)	False	False
r0525	AASS	0.6274	-0.0291	0.021	Lysine Degradation; Lysine Metabolism	AA other (Cys/Met/Lys/Arg/Pro)	False	False
r0541	GCDH	0.7173	-0.0291	0.01	Tryptophan Metabolism	AAA metabolism (Trp/Phe/Tyr)	False	False
r0594m	ALDH7A1	0.1784	-0.0291	0.4936	Lysine Metabolism	AA other (Cys/Met/Lys/Arg/Pro)	False	False
HUMANGEM_MAR11443	MPC1 and MPC2	0	0.0286		Transport, Mitochondrial	Mitochondrial transport	False	False
ACACT10m	ACAT1 or ACAA2	0.3323	-0.0145	0.5267	Valine, Leucine And Isoleucine Biosynthesis; Valine, Leucine And Isoleucine Degradation	BCAA metabolism (Val/Leu/Iso)	False	False
ENO	ENO1 or ENO4 or ENO2	0.9166	-0.0145	0.2348	Biosynthesis Of Amino Acids; Glycolysis/Gluconeogenesis; Methane Metabolism	Biosynthesis Of Amino Acids; Central Energy Metabolism; Methane Metabolism	False	False
GAPD	GAPDH	0.0251	-0.0145	0.9554	Glycolysis/Gluconeogenesis	Central Energy Metabolism	False	False
GLCt1	SLC2A11 or SLC2A9 or SLC2A9L or SLC2A12 or SLC2A1 or SLC2A6 or SLC2A8 or SLC2A2 or SLC2A10	1.2398	-0.0145	0.0571	Extracellular Transport	Extracellular Transport	False	False
HACD9m	HSD17B10 or EHHADH or HADH	0.3207	-0.0145	0.1213	Valine, Leucine And Isoleucine Biosynthesis; Valine, Leucine And Isoleucine Degradation	BCAA metabolism (Val/Leu/Iso)	False	False
ILETA	BCAT1 or IL4I1	0.2996	-0.0145	0.3687	2-oxocarboxylic Acid Metabolism; Biosynthesis Of Amino Acids; Valine, Leucine And Isoleucine Biosynthesis; Valine, Leucine And Isoleucine Degradation	2-oxocarboxylic Acid Metabolism; Biosynthesis Of Amino Acids; BCAA metabolism (Val/Leu/Iso)	False	False
PGK	PGK2	0.687	-0.0145	0.0067	Biosynthesis Of Amino Acids; Glycolysis/Gluconeogenesis	Biosynthesis Of Amino Acids; Central Energy Metabolism	False	False
PYK	PKLR	0.1662	-0.0145	0.8253	Biosynthesis Of Amino Acids; Glycolysis/Gluconeogenesis; Pyruvate Metabolism	Biosynthesis Of Amino Acids; Central Energy Metabolism	False	False
PYRt2	SLC16A3 or SLC16A7 or LOC416086 or SLC16A1	0.5163	-0.0145	0.4125	Extracellular Transport	Extracellular Transport	False	False
2HCO3_NAt	SLC4A5 or SLC4A4 or SLC4A9	3.6313	0	0.1034	Extracellular Transport	Extracellular Transport	False	False
ASPt6	SLC1A6 or SLC1A1 or SLC1A3 or SLC1A2 or SLC1A7	1.3057	0	0.1827	Extracellular Transport	Extracellular Transport	False	False
GLNtN1	SLC38A3	0.1612	0	0.5518	Extracellular Transport	Extracellular Transport	False	False
GLUDxm	GLUD2	1.1138	0	0.0013	Alanine, Aspartate And Glutamate Metabolism; Arginine Biosynthesis; Nitrogen Metabolism; Taurine And Hypotaurine Metabolism	AA central (A/D/E,G/S/T); AA other (Cys/Met/Lys/Arg/Pro); Nitrogen disposal; Taurine And Hypotaurine Metabolism	False	False
GLUNm	GLS2	1.4817	0	0.0072	Alanine, Aspartate And Glutamate Metabolism; Arginine Biosynthesis	AA central (A/D/E,G/S/T); AA other (Cys/Met/Lys/Arg/Pro)	False	False
H2Otm	AQP8	0	0		Transport, Mitochondrial	Mitochondrial transport	False	False
ILEtec	SLC43A2	0.2181	0	0.5928	Extracellular Transport	Extracellular Transport	False	False
KCCt	SLC12A7 or KIDINS220 or SLC12A4	0.7372	0	0.0194	Extracellular Transport	Extracellular Transport	False	False
NAHCO3_HCLt	HEBP2 or SLC4A10	-0.1404	0	0.8896	Extracellular Transport	Extracellular Transport	False	False
VALtec	SLC43A2	0.2181	0	0.5928	Extracellular Transport	Extracellular Transport	False	False
r0130	GGT2 or GGT2P	1.0237	0	0.0878	Glutathione Metabolism	Redox & Pentose Metabolism	False	False
