# Supplementary material
Source: Research Square preprint supplement (doi:10.21203/rs.3.rs-9275884/v1)
Supplement: Supplementary file 5 [file c9af39ce41d1ead274eb5572.xlsx]

## Sheet: BM
Subsystems	Increased	Decreased	On	Off	Unchanged	Increased_reactions	Decreased_reactions	Reversed_reactions	On_reactions	Off_reactions	Unchanged_reactions	n_reactions	flux_fast	flux_slow	total_flux_shift	mean_flux_shift
2-oxocarboxylic Acid Metabolism	1	0	5	3	5	AKGDm (1.68)			ACONTm (1000.00); ALATA__L (1000.00); CSm (1000.00); ICDHxm (1000.00); PDHm (1000.00)	2OXOADOXm (2000.00); ASPTAm (2000.00); r0450 (2000.00)	ASPTA (1.00); ILETA (1.00); PHETA1 (1.00); PHETA1m (1.00); VALTA (1.00)	14	24.504	22.7871	1.71686	0.122633
AA central (A/D/E,G/S/T)	0	6	1	2	12		GCC2am (0.60); GCC2bim (0.60); GHMT2rm (0.60); PGCD (0.60); PSERT (0.60); PSP__Lm (0.60)		ALATA__L (1000.00)	ASPTAm (2000.00); GLUDxm (2000.00)	ADSL1 (1.00); ADSS (1.00); ASPCTr (1.00); ASPTA (1.00); GLUNm (1.00); GLUPRT (1.00); PGM (1.04); r0034 (1.00); r0552 (0.98); r0552m (0.98); r0553 (0.98); r0553m (0.98)	21	21.2418	23.5536	-2.31171	-0.110081
AA other (Cys/Met/Lys/Arg/Pro)	0	2	2	9	4		PGCD (0.60); PSERT (0.60)		ACACT1rm (1000.00); ALATA__L (1000.00)	2OXOADOXm (2000.00); ASPTAm (2000.00); ECOAH1m (2000.00); GLUDxm (2000.00); HACD1m (2000.00); SACCD3m (2000.00); r0450 (2000.00); r0525 (2000.00); r0594m (2000.00)	ACACT1r (1.00); ASPTA (1.00); GLUNm (1.00); r0034 (1.00)	17	1.60731	2.76731	-1.16	-0.0682354
AAA metabolism (Trp/Phe/Tyr)	0	0	1	4	8				ACACT1rm (1000.00)	2OXOADOXm (2000.00); ECOAH1m (2000.00); HACD1m (2000.00); r0541 (2000.00)	3HKYNAKGAT (1.00); ACACT1r (1.00); FKYNH (1.00); KYN3OX (1.00); PHETA1 (1.00); PHETA1m (1.00); TRPO2 (1.00); r0647 (1.00)	13	22.1438	22.1677	-0.0238718	-0.00183629
Ascorbate And Aldarate Metabolism	0	0	0	0	1						DASCBR (0.95)	1	0.03562	0.0376619	-0.0020419	-0.0020419
BCAA metabolism (Val/Leu/Iso)	0	0	1	0	22				ACACT1rm (1000.00)		3HBCOAHLm (1.00); AACOAT (1.00); ACACT10m (1.00); ACACT1r (1.00); ECOAH12m (1.00); ECOAH9m (1.00); HACD9m (1.00); HIBDm (1.00); HMGCOASim (1.00); HMGLm (1.00); ILETA (1.00); MMEm (1.00); MMMm (1.00); MMSAD1m (1.00); PPCOACm (1.00); VALTA (1.00); r0385 (1.00); r0560 (1.00); r0561 (1.00); r0603 (1.00); r0604 (1.00); r0670 (1.00)	23	0.534112	0.524922	0.00918969	0.000399552
Beta-alanine Metabolism	0	0	0	3	0					APAT2rm (2000.00); ASP1DCm (2000.00); MMSAD3m (2000.00)		3	0	0.28997	-0.28997	-0.0966566
Biomass And Maintenance Functions	0	0	0	0	2						ATPM (1.00); BIOMASS_maintenance (1.00)	2	18.5342	18.5342	5.61329e-13	2.80664e-13
Biosynthesis Of Amino Acids	1	3	4	2	12	PCm (3.43)	GHMT2rm (0.60); PGCD (0.60); PSERT (0.60)		ACONTm (1000.00); ALATA__L (1000.00); CSm (1000.00); ICDHxm (1000.00)	ASPTAm (2000.00); r0450 (2000.00)	ASPTA (1.00); ENO (1.04); ILETA (1.00); PGK (1.00); PGM (1.04); PHETA1 (1.00); PHETA1m (1.00); PRPPS (1.00); PYK (1.04); RPI (1.00); VALTA (1.00); r0034 (1.00)	22	63.3387	62.1803	1.15846	0.0526571
Butanoate Metabolism	0	0	1	2	4				ACACT1rm (1000.00)	ECOAH1m (2000.00); HACD1m (2000.00)	AACOAT (1.00); ACACT1r (1.00); HMGCOASim (1.00); HMGLm (1.00)	7	0.0459485	0.0551382	-0.00918969	-0.00131281
Central Energy Metabolism	6	2	5	0	14	AKGDm (1.68); FUMm (1.62); ME2m (8.79); PCm (3.43); SUCOASm (1.62); r0509 (1.62)	GCC2cm (0.62); MDH (0.34)		ACACT1rm (1000.00); ACONTm (1000.00); CSm (1000.00); ICDHxm (1000.00); PDHm (1000.00)		ACACT1r (1.00); ACCOACm (1.00); ENO (1.04); FUM (1.00); GAPD (1.00); HEX1 (1.00); LDH__L (1.04); PFK (1.00); PGI (1.00); PGK (1.00); PGM (1.04); PGMT (1.00); PYK (1.04); TPI (1.00)	27	84.5275	80.0294	4.49812	0.166597
Cyanoamino Acid Metabolism	0	1	0	0	0		GHMT2rm (0.60)					1	0.528649	0.883452	-0.354804	-0.354804
Extracellular Transport	2	3	3	6	29	CO2t (2.01); CYSGLUexR (2.52)	BTNt2 (0.02); BTNt4i (0.02); OAAt_1 (0.27)		ARGLYSex (1000.00); ASNtN1 (1000.00); GLNt4 (1000.00)	ALAtN1 (2000.00); ARGATB0tc (2000.00); ASNt4 (2000.00); GLYt4 (2000.00); KCCt (2000.00); NKCCt (2000.00)	2HCO3_NAt (0.87); CHOLESTTDe (1.00); CHOLESTle (1.00); CHOLtu (1.00); CYTDt (1.00); GLCt1 (1.00); GLNtN1 (0.82); GLUt4 (1.20); H2O2t (0.95); HIStN1 (1.00); ILEtec (1.00); INSTt2 (1.00); METtec (1.00); NH4t (0.97); O2t (0.95); PCt (1.00); PHEtec (1.00); PIt9 (1.00); PROt4 (1.00); PSFLIP (1.00); RTOTALt (1.00); SERt4 (1.00); THRt4 (1.00); TRPt (1.00); TYRPHELAT2tc (1.00); URIt (1.00); VALtec (1.00)…	43	13.3238	14.0707	-0.746987	-0.0173718
Folate Metabolism	0	4	0	0	6		FTHFDHm (0.60); GHMT2rm (0.60); MTHFCm (0.60); MTHFD2m (0.60)				AICART (1.00); FTHFL (1.00); GARFT (1.00); r0226 (1.00); r0552 (0.98); r0553 (0.98)	10	6.23754	8.77547	-2.53793	-0.253793
Glyoxylate And Dicarboxylate Metabolism	0	2	2	0	4		GHMT2rm (0.60); MDH (0.34)		ACACT1rm (1000.00); CSm (1000.00)		ACACT1r (1.00); MMEm (1.00); MMMm (1.00); PPCOACm (1.00)	8	1.18841	1.52804	-0.339631	-0.0424539
Inositol Phosphate Metabolism	0	0	0	1	0					MMSAD3m (2000.00)		1	0	0.0966566	-0.0966566	-0.0966566
Lipid metabolism	0	1	1	3	32		r0202c (0.01)		ACACT1rm (1000.00)	ECOAH1m (2000.00); HACD1m (2000.00); r0205 (2000.00)	3DSPHR (1.00); ACACT1r (1.00); ACCOACm (1.00); AGPAT1 (1.00); ARTPLM2 (1.00); ARTPLM3 (1.00); CDIPTr (1.00); CDS (1.00); CEPTC (1.00); CHLPCTD (1.00); CHOLK (1.00); CLSm_hs (1.00); DAGK_hs (1.00); DGAT (1.00); DSAT (1.00); FAS100COA (1.00); FAS120COA (1.00); FAS140COA (1.00); FAS160COA (1.00); FAS80COA__L (1.00); GPAM_hs (1.00); GPDDA1 (1.00); HMGCOASim (1.00); HMGLm (1.00); LPASE (1.00); PGPPTm …	37	0.412072	2.37511	-1.96303	-0.053055
Lysine Biosynthesis	0	0	0	1	0					r0450 (2000.00)		1	0	0.00918969	-0.00918969	-0.00918969
Methane Metabolism	0	4	0	0	2		GHMT2rm (0.60); MDH (0.34); PGCD (0.60); PSERT (0.60)				ENO (1.04); PGM (1.04)	6	20.5837	21.264	-0.680363	-0.113394
Mitochondrial transport	0	1	0	1	30		PSERtm (0.60)			LYStm (2000.00)	3MOBt2im (1.00); AKGMALtm (1.03); ATPtm (0.97); CO2tm (1.09); COAtim (1.00); DHORD9 (1.00); DNDPt14m (1.00); GLNtm (1.00); GLUt2m (1.03); H2Otm (0.95); HUMANGEM_MAR00120 (1.00); HUMANGEM_MAR00587 (1.00); HUMANGEM_MAR05036 (1.00); HUMANGEM_MAR05116 (1.00); HUMANGEM_MAR08093 (1.00); HUMANGEM_MAR08651 (1.00); HUMANGEM_MAR08891 (1.00); HUMANGEM_MAR11363 (1.00); HUMANGEM_MAR11371 (1.00); HUMANGEM_MAR1…	32	90.2721	90.9562	-0.68408	-0.0213775
Nitrogen disposal	2	0	0	1	33	r1418 (1.40); r1418m (1.86)				GLUDxm (2000.00)	ADK1 (1.00); ADSL1 (1.00); ADSL2 (1.00); ADSS (1.00); AICART (1.00); AIRCr (1.00); ATPM (1.00); GARFT (1.00); GK1 (1.00); GLUPRT (1.00); GMPR (0.97); GUAPRT (1.00); IMPC (1.00); NDPK1 (1.00); NDPK10 (1.00); NDPK10n (1.00); NDPK5 (1.00); NDPK8 (1.00); NDPK8m (1.00); NTD7 (1.00); NTD8 (1.00); PPM (1.00); PRAGSr (1.00); PRASCS (1.00); PRFGS (1.00); PRPPS (1.00); PUNP1 (1.00); PUNP2 (1.00); PUNP3 (1.…	36	23.978	24.4781	-0.500125	-0.0138924
Nucleotide Salvage Pathway	0	0	0	0	1						GUAPRT (1.00)	1	0.0249033	0.0249033	-1.60101e-13	-1.60101e-13
Nucleotide metabolism	0	0	0	0	63						ADK1 (1.00); ADKd (1.00); ADSL1 (1.00); ADSL2 (1.00); ADSS (1.00); AICART (1.00); AIRCr (1.00); ASPCTr (1.00); ATPM (1.00); CTPS2 (1.00); CYTDK1 (1.00); CYTDe (1.00); CYTK1 (1.00); CYTK12 (1.00); CYTK1m (1.00); DADNK (1.00); DCMPDA (1.00); DGK1 (1.00); DHORTS (1.00); DURIK1 (1.00); DURIPP (1.00); DUTPDPm (1.00); GARFT (1.00); GK1 (1.00); GLUPRT (1.00); GMPR (0.97); GUAPRT (1.00); IMPC (1.00); NDP…	63	21.3084	21.3586	-0.0502203	-0.000797147
Oxidative Phosphorylation	0	0	0	0	5						ATPS4m (0.96); CYOOm3 (0.95); CYOR_u10m (0.95); NADH2_u10m (1.04); PPAm (1.00)	5	28.7651	29.6316	-0.866565	-0.173313
Pantothenate And Coa Biosynthesis	0	0	0	0	1						VALTA (1.00)	1	0.0152884	0.0152884	-5.691e-13	-5.691e-13
Propanoate Metabolism	1	0	0	2	4	SUCOASm (1.62)				APAT2rm (2000.00); MMSAD3m (2000.00)	ACCOACm (1.00); MMEm (1.00); MMMm (1.00); PPCOACm (1.00)	7	1.19611	1.03352	0.162591	0.0232273
Pseudoreactions	3	2	1	2	27	EX_co2_e (1.99); EX_cys__L_e (2.52); EX_gthrd_e (2.32)	EX_lys__L_e (0.74); EX_oaa_e (0.27)		EX_cgly_e (1000.00)	EX_ala__L_e (2000.00); EX_gly_e (2000.00)	EX_C02470_e (1.00); EX_arg__L_e (1.00); EX_asn__L_e (1.00); EX_chol_e (1.00); EX_chsterol_e (1.00); EX_glc__D_e (1.00); EX_gln__L_e (1.00); EX_glu__L_e (1.00); EX_h2o2_e (0.95); EX_h_e (0.93); EX_hco3_e (0.86); EX_his__L_e (1.00); EX_ile__L_e (1.00); EX_inost_e (1.00); EX_lac__L_e (1.04); EX_leu__L_e (1.00); EX_met__L_e (1.00); EX_nh4_e (0.98); EX_o2_e (0.95); EX_phe__L_e (1.00); EX_pi_e (1.00); …	35	33.831	34.4907	-0.659615	-0.0188461
Purine Catabolism	0	0	0	0	4						PUNP2 (1.00); PUNP3 (1.00); PUNP4 (1.00); r0276 (0.97)	4	0.997131	1.02224	-0.0251101	-0.00627753
Redox & Pentose Metabolism	2	0	1	0	8	AMPTASECG (1.79); r0129 (1.79)			r0130 (1000.00)		FBA (1.00); G6PDH2r (1.00); GALU (1.00); GND (1.00); PGL (1.00); PPM (1.00); PRPPS (1.00); RPI (1.00)	11	5.16411	5.12515	0.0389607	0.00354188
Starch And Sucrose Metabolism	0	0	0	0	3						GLBRAN (1.00); GLGNS1 (1.00); HEX1 (1.00)	3	5.00176	5.00176	1.42109e-13	4.73695e-14
Taurine And Hypotaurine Metabolism	0	0	0	1	0					GLUDxm (2000.00)		1	0	0.329693	-0.329693	-0.329693
Terpenoid Backbone Biosynthesis	0	0	1	0	2				ACACT1rm (1000.00)		ACACT1r (1.00); HMGCOASim (1.00)	3	0.0275691	0.0183794	0.00918969	0.00306323
Transport, Endoplasmic Reticulum	2	0	0	0	3	BILGLCURtr (1.79); HUMANGEM_MAR06107 (1.79)					PE_HSter (1.00); PIter (1.00); PPItr (1.00)	5	0.0783821	0.0491846	0.0291975	0.00583949
Transport, Endosomal	1	0	0	0	3	LYSt5r (1.30)					LEUtec (1.00); LPCHOLt (1.00); L__LACt2r (1.04)	4	9.47964	9.14517	0.334466	0.0836165
Transport, Nuclear	0	0	0	0	4						DIDPtn (1.00); DITPtn (1.00); DTDPtn (1.00); DTTPtn (1.00)	4	0.00478353	0.00478353	-1.49e-13	-3.72499e-14
Unknown	0	0	0	0	1						LCAT1e (1.00)	1	0.00900455	0.00900455	-7.97001e-14	-7.97001e-14
Vitamin C Metabolism	0	0	0	0	1						ASCBOX (0.95)	1	0.03562	0.0376619	-0.0020419	-0.0020419

## Sheet: LM
Subsystems	Increased	Decreased	Reversed	On	Off	Unchanged	Increased_reactions	Decreased_reactions	Reversed_reactions	On_reactions	Off_reactions	Unchanged_reactions	n_reactions	flux_fast	flux_slow	total_flux_shift	mean_flux_shift
2-oxocarboxylic Acid Metabolism	7	3	0	0	0	3	ACONTm (2.64); AKGDm (1.42); ALATA__L (1.40); ASPTA (1.40); CSm (2.64); ICDHxm (2.64); PDHm (3.59)	2OXOADOXm (0.18); VALTA (0.79); r0450 (0.18)				ILETA (0.91); PHETA1 (1.05); PHETA1m (1.05)	13	23.4639	20.6811	2.7828	0.214061
AA central (A/D/E,G/S/T)	8	6	0	0	1	6	ADSL1 (1.40); ADSS (1.40); ALATA__L (1.40); ASPCTr (1.40); ASPTA (1.40); GLUDxm (1.85); GLUPRT (1.40); r0034 (1.40)	GCC2am (0.00); GCC2bim (0.00); GHMT2rm (0.00); PGCD (0.00); PSERT (0.00); PSP__Lm (0.00)			P5CDm (2000.00)	GLUNm (0.98); PGM (1.04); r0552 (0.96); r0552m (1.00); r0553 (0.96); r0553m (1.00)	21	18.0505	19.8192	-1.76874	-0.0842258
AA other (Cys/Met/Lys/Arg/Pro)	4	10	0	0	1	1	ALATA__L (1.40); ASPTA (1.40); GLUDxm (1.85); r0034 (1.40)	2OXOADOXm (0.18); ACACT1r (0.18); ECOAH1m (0.18); HACD1m (0.18); PGCD (0.00); PSERT (0.00); SACCD3m (0.18); r0450 (0.18); r0525 (0.18); r0594m (0.18)			PRO1xm (2000.00)	GLUNm (0.98)	16	1.17173	1.91981	-0.748083	-0.0467552
AAA metabolism (Trp/Phe/Tyr)	5	5	0	0	0	2	3HKYNAKGAT (1.40); FKYNH (1.40); KYN3OX (1.40); TRPO2 (1.40); r0647 (1.40)	2OXOADOXm (0.18); ACACT1r (0.18); ECOAH1m (0.18); HACD1m (0.18); r0541 (0.18)				PHETA1 (1.05); PHETA1m (1.05)	12	20.0021	19.1168	0.88535	0.0737792
Ascorbate And Aldarate Metabolism	0	0	0	0	0	1						DASCBR (1.05)	1	0.0327114	0.0311107	0.00160076	0.00160076
BCAA metabolism (Val/Leu/Iso)	0	12	0	0	0	10		3HBCOAHLm (0.79); AACOAT (0.18); ACACT1r (0.18); ECOAH12m (0.79); HIBDm (0.79); HMGCOASim (0.18); HMGLm (0.18); MMSAD1m (0.79); VALTA (0.79); r0385 (0.79); r0560 (0.79); r0561 (0.79)				ACACT10m (0.91); ECOAH9m (0.91); HACD9m (0.91); ILETA (0.91); MMEm (0.86); MMMm (0.86); PPCOACm (0.86); r0603 (0.91); r0604 (0.91); r0670 (0.91)	22	0.680851	0.915593	-0.234742	-0.0106701
Biomass And Maintenance Functions	1	0	0	0	0	1	BIOMASS_maintenance (1.40)					ATPM (1.00)	2	18.524	18.5172	0.00687051	0.00343525
Biosynthesis Of Amino Acids	9	5	0	0	1	7	ACONTm (2.64); ALATA__L (1.40); ASPTA (1.40); CSm (2.64); ICDHxm (2.64); PCm (2.64); PRPPS (1.40); RPI (1.40); r0034 (1.40)	GHMT2rm (0.00); PGCD (0.00); PSERT (0.00); VALTA (0.79); r0450 (0.18)			PRO1xm (2000.00)	ENO (1.04); ILETA (0.91); PGK (1.00); PGM (1.04); PHETA1 (1.05); PHETA1m (1.05); PYK (1.04)	22	62.158	59.8444	2.31362	0.105165
Butanoate Metabolism	0	6	0	0	0	0		AACOAT (0.18); ACACT1r (0.18); ECOAH1m (0.18); HACD1m (0.18); HMGCOASim (0.18); HMGLm (0.18)					6	0.0387642	0.221416	-0.182652	-0.030442
Central Energy Metabolism	10	3	0	1	1	12	ACONTm (2.64); AKGDm (1.42); CSm (2.64); ICDHxm (2.64); ME2m (3.38); PCm (2.64); PDHm (3.59); PGMT (1.40); SUCOASm (1.37); r0509 (1.37)	ACACT1r (0.18); GCC2cm (0.14); MDH (0.06)		ACCOACm (1000.00)	ACCOAC (2000.00)	ENO (1.04); FUM (1.07); FUMm (1.09); GAPD (1.00); HEX1 (1.00); LDH__L (0.91); PFK (1.00); PGI (1.00); PGK (1.00); PGM (1.04); PYK (1.04); TPI (1.00)	27	112.527	107.685	4.84188	0.179329
Cyanoamino Acid Metabolism	0	1	0	0	0	0		GHMT2rm (0.00)					1	0.000420375	0.374004	-0.373584	-0.373584
Extracellular Transport	25	3	2	2	1	7	2HCO3_NAt (1.44); ARGLYSex (1.40); ASNtN1 (1.40); BTNt2 (1.88); BTNt4i (1.88); CHOLESTTDe (1.40); CHOLESTle (1.40); CHOLtu (1.40); CYTDt (1.40); GLUt4 (1.53); HIStN1 (1.40); INSTt2 (1.40); METtec (1.40); PCt (1.40); PHEtec (1.40); PIt9 (1.40); PSFLIP (1.40); RTOTALt (1.40); SERt4 (1.40); THRt4 (1.40); TRPt (1.40); TYRPHELAT2tc (1.40); URIt (1.40); r1030 (1.40); r1402 (1.40)	CO2t (0.59); OAAt_1 (0.00); PROt4 (0.33)	CA2t (3000.00); CAt7r (3000.00)	CYSGLUexR (1000.00); PYRt2 (1000.00)	CYStec (2000.00)	GLCt1 (1.00); GLNtN1 (0.97); H2O2t (1.05); ILEtec (1.00); NH4t (0.91); O2t (1.05); VALtec (1.00)	40	13.4415	12.76	0.681522	0.017038
Folate Metabolism	4	1	0	0	3	2	AICART (1.40); FTHFL (1.40); GARFT (1.40); r0226 (1.40)	GHMT2rm (0.00)			FTHFDHm (2000.00); MTHFCm (2000.00); MTHFD2m (2000.00)	r0552 (0.96); r0553 (0.96)	10	2.55029	5.27798	-2.72769	-0.272769
Glyoxylate And Dicarboxylate Metabolism	1	3	0	0	0	3	CSm (2.64)	ACACT1r (0.18); GHMT2rm (0.00); MDH (0.06)				MMEm (0.86); MMMm (0.86); PPCOACm (0.86)	7	0.787495	1.37045	-0.582953	-0.083279
Lipid metabolism	29	5	0	1	1	0	3DSPHR (1.40); AGPAT1 (1.40); ARTPLM2 (1.40); ARTPLM3 (1.40); CDIPTr (1.40); CDS (1.40); CEPTC (1.40); CHLPCTD (1.40); CHOLK (1.40); CLSm_hs (1.40); DAGK_hs (1.40); DGAT (1.40); DSAT (1.40); FAS100COA (1.40); FAS120COA (1.40); FAS140COA (1.40); FAS160COA (1.40); FAS80COA__L (1.40); GPAM_hs (1.40); GPDDA1 (1.40); LPASE (1.40); PGPPTm (1.40); PGPP_hs (1.40); PSDm_hs (1.40); PSSA1_hs (1.40); RE2675C…	ACACT1r (0.18); ECOAH1m (0.18); HACD1m (0.18); HMGCOASim (0.18); HMGLm (0.18)		ACCOACm (1000.00)	ACCOAC (2000.00)		36	0.296163	0.372905	-0.0767422	-0.00213173
Lysine Biosynthesis	0	1	0	0	0	0		r0450 (0.18)					1	0.0064607	0.0369027	-0.030442	-0.030442
Methane Metabolism	0	4	0	0	0	2		GHMT2rm (0.00); MDH (0.06); PGCD (0.00); PSERT (0.00)				ENO (1.04); PGM (1.04)	6	19.9549	20.8453	-0.890342	-0.14839
Mitochondrial transport	12	4	0	2	1	15	DHORD9 (1.40); DNDPt14m (1.40); HUMANGEM_MAR00120 (1.40); HUMANGEM_MAR00587 (1.40); HUMANGEM_MAR05036 (1.40); HUMANGEM_MAR08651 (1.40); HUMANGEM_MAR08891 (1.40); HUMANGEM_MAR11363 (1.40); HUMANGEM_MAR11371 (1.40); HUMANGEM_MAR20147 (1.40); HUMANGEM_MAR20148 (1.40); PPItm (1.20)	3MOBt2im (0.79); LYStm (0.18); PSERtm (0.00); r1464 (0.18)		COAtim (1000.00); MALCOAtm (1000.00)	PROtm (2000.00)	AKGMALtm (1.09); ATPtm (1.01); CO2tm (1.12); FUMSO4tm (1.07); GLNtm (0.98); GLUt2m (1.10); HUMANGEM_MAR05116 (1.05); HUMANGEM_MAR08093 (0.91); HUMANGEM_MAR11443 (1.05); HUMANGEM_MAR20139 (0.91); HUMANGEM_MAR20145 (0.91); MALSO4tm (1.07); MALtm (1.04); O2Stm (1.05); O2tm (1.05)	34	95.0193	90.241	4.77833	0.140539
Nitrogen disposal	32	0	0	0	0	4	ADSL1 (1.40); ADSL2 (1.40); ADSS (1.40); AICART (1.40); AIRCr (1.40); GARFT (1.40); GK1 (1.40); GLUDxm (1.85); GLUPRT (1.40); GUAPRT (1.40); IMPC (1.40); NDPK1 (1.40); NDPK10 (1.40); NDPK10n (1.40); NDPK5 (1.40); NDPK8 (1.40); NDPK8m (1.40); NTD7 (1.40); NTD8 (1.40); PPM (1.40); PRAGSr (1.40); PRASCS (1.40); PRFGS (1.40); PRPPS (1.40); PUNP1 (1.40); PUNP2 (1.40); PUNP3 (1.40); PUNP4 (1.40); r0034…					ADK1 (1.20); ATPM (1.00); GMPR (0.90); r0276 (0.91)	36	24.8562	23.568	1.28822	0.0357839
Nucleotide Salvage Pathway	1	0	0	0	0	0	GUAPRT (1.40)						1	0.017508	0.0125004	0.00500755	0.00500755
Nucleotide metabolism	59	0	0	0	0	4	ADKd (1.40); ADSL1 (1.40); ADSL2 (1.40); ADSS (1.40); AICART (1.40); AIRCr (1.40); ASPCTr (1.40); CTPS2 (1.40); CYTDK1 (1.40); CYTDe (1.40); CYTK1 (1.40); CYTK12 (1.40); CYTK1m (1.40); DADNK (1.40); DCMPDA (1.40); DGK1 (1.40); DHORTS (1.40); DURIK1 (1.40); DURIPP (1.40); DUTPDPm (1.40); GARFT (1.40); GK1 (1.40); GLUPRT (1.40); GUAPRT (1.40); IMPC (1.40); NDPK1 (1.40); NDPK10 (1.40); NDPK10n (1.40…					ADK1 (1.20); ATPM (1.00); GMPR (0.90); r0276 (0.91)	63	21.2228	21.302	-0.0791916	-0.00125701
Oxidative Phosphorylation	1	0	0	0	0	4	PPAm (1.20)					ATPS4m (1.02); CYOOm3 (1.05); CYOR_u10m (1.05); NADH2_u10m (1.01)	5	25.4536	24.6974	0.756174	0.151235
Pantothenate And Coa Biosynthesis	0	1	0	0	0	0		VALTA (0.79)					1	0.0255964	0.0325762	-0.0069798	-0.0069798
Propanoate Metabolism	1	0	0	1	1	3	SUCOASm (1.37)			ACCOACm (1000.00)	ACCOAC (2000.00)	MMEm (0.86); MMMm (0.86); PPCOACm (0.86)	6	1.46761	1.15151	0.316095	0.0526826
Pseudoreactions	18	4	0	2	0	10	EX_C02470_e (1.40); EX_arg__L_e (1.40); EX_asn__L_e (1.40); EX_chol_e (1.40); EX_chsterol_e (1.40); EX_cys__L_e (1.40); EX_gthrd_e (3.01); EX_hco3_e (1.42); EX_his__L_e (1.40); EX_inost_e (1.40); EX_leu__L_e (1.40); EX_met__L_e (1.40); EX_phe__L_e (1.40); EX_pi_e (1.40); EX_ser__L_e (1.40); EX_thr__L_e (1.40); EX_trp__L_e (1.40); EX_tyr__L_e (1.40)	EX_co2_e (0.63); EX_lys__L_e (0.50); EX_oaa_e (0.00); EX_pro__L_e (0.33)		EX_cgly_e (1000.00); EX_pyr_e (1000.00)		EX_glc__D_e (1.00); EX_gln__L_e (1.00); EX_glu__L_e (1.00); EX_h2o2_e (1.05); EX_h_e (0.99); EX_ile__L_e (1.00); EX_lac__L_e (0.91); EX_nh4_e (0.91); EX_o2_e (1.05); EX_val__L_e (1.00)	34	33.8438	33.5164	0.327433	0.00963037
Purine Catabolism	3	0	0	0	0	1	PUNP2 (1.40); PUNP3 (1.40); PUNP4 (1.40)					r0276 (0.91)	4	1.07522	1.18053	-0.105306	-0.0263264
Redox & Pentose Metabolism	9	0	0	1	0	1	AMPTASECG (1.40); G6PDH2r (1.40); GALU (1.40); GND (1.40); PGL (1.40); PPM (1.40); PRPPS (1.40); RPI (1.40); r0129 (1.40)			r0130 (1000.00)		FBA (1.00)	11	5.13523	5.07748	0.0577525	0.00525023
Starch And Sucrose Metabolism	2	0	0	0	0	1	GLBRAN (1.40); GLGNS1 (1.40)					HEX1 (1.00)	3	5.00123	5.00088	0.000352952	0.000117651
Taurine And Hypotaurine Metabolism	1	0	0	0	0	0	GLUDxm (1.85)						1	0.596999	0.322344	0.274655	0.274655
Terpenoid Backbone Biosynthesis	0	2	0	0	0	0		ACACT1r (0.18); HMGCOASim (0.18)					2	0.0129214	0.0738054	-0.060884	-0.030442
Transport, Endoplasmic Reticulum	5	0	0	0	0	0	BILGLCURtr (1.40); HUMANGEM_MAR06107 (1.40); PE_HSter (1.40); PIter (1.40); PPItr (1.40)						5	0.0551055	0.0393445	0.015761	0.00315221
Transport, Endosomal	2	1	0	0	0	1	LEUtec (1.40); LPCHOLt (1.40)	LYSt5r (0.65)				L__LACt2r (0.91)	4	8.80335	9.63477	-0.831415	-0.207854
Transport, Nuclear	4	0	0	0	0	0	DIDPtn (1.40); DITPtn (1.40); DTDPtn (1.40); DTTPtn (1.40)						4	0.003363	0.00240113	0.000961871	0.000240468
Unknown	1	0	0	0	0	0	LCAT1e (1.40)						1	0.00633054	0.00451991	0.00181063	0.00181063
Vitamin C Metabolism	0	0	0	0	0	1						ASCBOX (1.05)	1	0.0327114	0.0311107	0.00160076	0.00160076

## Sheet: LV
Subsystems	Increased	Decreased	On	Off	Unchanged	Increased_reactions	Decreased_reactions	Reversed_reactions	On_reactions	Off_reactions	Unchanged_reactions	n_reactions	flux_fast	flux_slow	total_flux_shift	mean_flux_shift
2-oxocarboxylic Acid Metabolism	0	0	1	1	12				PDHm (1000.00)	ASPTAm (2000.00)	2OXOADOXm (0.98); ACONTm (0.97); AKGDm (0.97); ALATA__L (1.01); ASPTA (0.97); CSm (0.97); ICDHym (0.97); ILETA (0.99); PHETA1 (1.02); PHETA1m (1.02); VALTA (0.98); r0450 (0.98)	14	27.1883	26.9967	0.191583	0.0136845
AA central (A/D/E,G/S/T)	0	2	1	4	16		r0552 (0.66); r0553 (0.66)		r0034 (1000.00)	ASPTAm (2000.00); CBPS (2000.00); P5CDm (2000.00); THRD__L (2000.00)	ADSL1 (1.11); ADSS (1.11); ALATA__L (1.01); ASPCTr (1.11); ASPTA (0.97); GHMT2rm (1.11); GLUDxm (1.00); GLUNm (1.00); GLUPRT (1.11); PGCD (1.11); PGM (0.99); PSERT (1.11); PSP__Lm (1.11); r0295 (1.11); r0552m (0.97); r0553m (0.97)	23	36.6503	47.8497	-11.1993	-0.486927
AA other (Cys/Met/Lys/Arg/Pro)	0	0	4	3	14				ARGNm (1000.00); ORNTArm (1000.00); r0034 (1000.00); r0074 (1000.00)	ASPTAm (2000.00); CBPS (2000.00); PRO1xm (2000.00)	2OXOADOXm (0.98); ACACT1r (1.11); ALATA__L (1.01); ASPTA (0.97); ECOAH1m (0.98); GLUDxm (1.00); GLUNm (1.00); HACD1m (0.98); PGCD (1.11); PSERT (1.11); SACCD3m (0.98); r0450 (0.98); r0525 (0.98); r0594m (0.98)	21	2.81574	3.51934	-0.703602	-0.0335049
AAA metabolism (Trp/Phe/Tyr)	0	0	0	0	12						2OXOADOXm (0.98); 3HKYNAKGAT (1.11); ACACT1r (1.11); ECOAH1m (0.98); FKYNH (1.11); HACD1m (0.98); KYN3OX (1.11); PHETA1 (1.02); PHETA1m (1.02); TRPO2 (1.11); r0541 (0.98); r0647 (1.11)	12	21.1381	20.8163	0.321835	0.0268196
Ascorbate And Aldarate Metabolism	0	0	0	0	1						DASCBR (0.96)	1	0.0308755	0.0320712	-0.00119567	-0.00119567
BCAA metabolism (Val/Leu/Iso)	0	0	0	1	22					THRD__L (2000.00)	3HBCOAHLm (0.98); AACOAT (1.11); ACACT10m (0.99); ACACT1r (1.11); ECOAH12m (0.98); ECOAH9m (0.99); HACD9m (0.99); HIBDm (0.98); HMGCOASim (0.98); HMGLm (0.98); ILETA (0.99); MMEm (0.98); MMMm (0.98); MMSAD1m (0.98); PPCOACm (0.98); VALTA (0.98); r0385 (0.98); r0560 (0.98); r0561 (0.98); r0603 (0.99); r0604 (0.99); r0670 (0.99)	23	1.02709	1.04161	-0.0145128	-0.000630991
Beta-alanine Metabolism	0	0	0	3	0					APAT2rm (2000.00); ASP1DCm (2000.00); MMSAD3m (2000.00)		3	0	2.41836	-2.41836	-0.806119
Biomass And Maintenance Functions	0	0	0	0	2						ATPM (1.00); BIOMASS_maintenance (1.11)	2	18.509	18.5081	0.000867304	0.000433652
Biosynthesis Of Amino Acids	0	1	2	3	19		PCm (0.50)		ARGNm (1000.00); r0034 (1000.00)	ASPTAm (2000.00); PRO1xm (2000.00); THRD__L (2000.00)	ACONTm (0.97); ALATA__L (1.01); ASPTA (0.97); CSm (0.97); ENO (0.99); GHMT2rm (1.11); ICDHym (0.97); ILETA (0.99); PGCD (1.11); PGK (0.99); PGM (0.99); PHETA1 (1.02); PHETA1m (1.02); PRPPS (1.09); PSERT (1.11); PYK (0.99); RPI (1.11); VALTA (0.98); r0450 (0.98)	25	65.3364	67.0551	-1.71865	-0.0687461
Butanoate Metabolism	0	0	0	0	6						AACOAT (1.11); ACACT1r (1.11); ECOAH1m (0.98); HACD1m (0.98); HMGCOASim (0.98); HMGLm (0.98)	6	0.211229	0.210146	0.001083	0.0001805
Central Energy Metabolism	1	1	3	0	20	HEX1 (868.37)	PCm (0.50)		PDHm (1000.00); PFK (1000.00); PGI (1000.00)		ACACT1r (1.11); ACCOAC (1.11); ACONTm (0.97); AKGDm (0.97); CSm (0.97); ENO (0.99); FUM (1.11); FUMm (0.97); GAPD (0.99); GCC2cm (0.98); ICDHym (0.97); MDH (0.97); ME2m (0.97); PGK (0.99); PGM (0.99); PGMT (1.11); PYK (0.99); SUCOAS1m (0.97); TPI (0.99); r0509 (0.97)	25	81.0224	67.0237	13.9987	0.559948
Cyanoamino Acid Metabolism	0	0	0	0	1						GHMT2rm (1.11)	1	0.00451566	0.00408015	0.000435515	0.000435515
Extracellular Transport	1	3	1	1	40	ARGLYSex (10.54)	GLUt4 (0.80); NH4t (0.08); PROt4 (0.12)		UREAt (1000.00)	2HBt2 (2000.00)	2HCO3_NAt (1.00); 5MTHFt (0.95); 5MTHFt2le (0.95); ACACt2 (0.90); ALAPAT4te (1.07); ALAtN1 (0.96); ASNtN1 (1.11); ASPt6 (1.00); CHOLESTTDe (1.11); CHOLESTle (1.11); CHOLtu (1.11); CO2t (0.97); CYSt4 (1.11); CYTDt (1.11); FOLt2 (0.95); FOLt2le (0.95); GLCt1 (0.99); GLNtN1 (1.00); H2O2t (0.99); HIStN1 (1.11); ILEtec (1.00); INSTt4_2 (1.11); KCCt (1.00); METt4 (1.11); NAHCO3_HCLt (1.00); O2t (0.98);…	46	50.0414	50.9794	-0.937991	-0.0203911
Fatty Acid Elongation	0	0	0	0	1						ACACt2 (0.90)	1	0.0237837	0.0263121	-0.00252844	-0.00252844
Folate Metabolism	0	2	0	0	6		r0552 (0.66); r0553 (0.66)				AICART (1.11); FTHFL (1.11); GARFT (1.11); GHMT2rm (1.11); r0226 (1.11); r0295 (1.11)	8	19.7088	29.8408	-10.132	-1.2665
Fructose And Mannose Metabolism	0	0	0	5	0					FBA2 (2000.00); KHK (2000.00); SBTD__D2 (2000.00); SBTR (2000.00); TRIOK (2000.00)		5	0	24.9243	-24.9243	-4.98487
Glyoxylate And Dicarboxylate Metabolism	0	0	0	0	10						ACACT1r (1.11); CSm (0.97); GHMT2rm (1.11); GLYCLTDy (0.99); GLYCTO1p (0.99); MDH (0.97); MMEm (0.98); MMMm (0.98); PPCOACm (0.98); r0295 (1.11)	10	20.6497	20.8509	-0.201232	-0.0201232
Inositol Phosphate Metabolism	0	0	0	1	0					MMSAD3m (2000.00)		1	0	0.806119	-0.806119	-0.806119
Lipid metabolism	1	0	6	3	32	PSSA1_hs (1.46)			3DSPHRr (1000.00); C160CPT1 (1000.00); PSSA1r_hs (1000.00); SERPTr (1000.00); SMSr (1000.00); r0434 (1000.00)	3DSPHR (2000.00); SERPT (2000.00); SMS (2000.00)	ACACT1r (1.11); ACACt2 (0.90); ACCOAC (1.11); AGPAT1 (1.11); ARTPLM2 (1.11); ARTPLM3 (1.11); CDIPTr (1.11); CDS (1.11); CEPTC (1.11); CHLPCTD (1.11); CHOLK (1.11); CLSm_hs (1.11); DAGK_hs (1.11); DGAT (1.11); DSAT (1.11); ECOAH1m (0.98); FAS100COA (1.11); FAS120COA (1.11); FAS140COA (1.11); FAS160COA (1.11); FAS80COA__L (1.11); GPAM_hs (1.11); GPDDA1 (1.11); HACD1m (0.98); HMGCOASim (0.98); HMGLm…	42	0.315212	0.308227	0.00698495	0.000166308
Lysine Biosynthesis	0	0	0	0	1						r0450 (0.98)	1	0.0431327	0.0437951	-0.000662315	-0.000662315
Methane Metabolism	0	0	0	0	6						ENO (0.99); GHMT2rm (1.11); MDH (0.97); PGCD (1.11); PGM (0.99); PSERT (1.11)	6	19.8054	19.9781	-0.172736	-0.0287894
Mitochondrial transport	1	0	5	2	28	HUMANGEM_MAR20139 (1.46)			ARGtm (1000.00); HUMANGEM_MAR04951 (1000.00); HUMANGEM_MAR08651 (1000.00); HUMANGEM_MAR13075 (1000.00); HUMANGEM_MAR20136 (1000.00)	HUMANGEM_MAR05036 (2000.00); PROtm (2000.00)	3MOBt2im (0.98); AKGMALtm (1.02); ATPtm (1.02); CO2tm (0.97); DHORD9 (1.11); DNDPt14m (1.11); GLNtm (1.00); GLUt2m (1.01); GLYtm (1.11); H2Otm (1.00); HUMANGEM_MAR00120 (1.11); HUMANGEM_MAR00587 (1.11); HUMANGEM_MAR05116 (1.02); HUMANGEM_MAR08093 (0.99); HUMANGEM_MAR08891 (1.11); HUMANGEM_MAR11363 (1.11); HUMANGEM_MAR11371 (1.11); HUMANGEM_MAR11443 (1.02); HUMANGEM_MAR20145 (1.11); HUMANGEM_MAR20…	36	77.2277	76.4916	0.736016	0.0204449
Nitrogen disposal	0	1	4	1	32		r1418m (0.52)		ARGNm (1000.00); ORNTArm (1000.00); r0034 (1000.00); r0074 (1000.00)	PUNP3 (2000.00)	ADK1 (1.11); ADSL1 (1.11); ADSL2 (1.11); ADSS (1.11); AICART (1.11); AIRCr (1.11); ATPM (1.00); GARFT (1.11); GK1 (1.11); GLUDxm (1.00); GLUPRT (1.11); GUAPRT (1.08); IMPC (1.11); NDPK1 (1.11); NDPK10 (1.11); NDPK10n (1.11); NDPK1m (0.97); NDPK5 (1.11); NDPK8 (1.11); NDPK8m (1.11); NTD7 (1.11); NTD8 (1.11); PPM (1.08); PRAGSr (1.11); PRASCS (1.11); PRFGS (1.11); PRPPS (1.09); PUNP1 (1.11); PUNP2 …	38	21.7697	22.496	-0.726363	-0.0191148
Nucleotide Salvage Pathway	0	0	0	0	1						GUAPRT (1.08)	1	0.00642211	0.00592217	0.000499939	0.000499939
Nucleotide metabolism	0	0	0	3	61					CBPS (2000.00); NTD9m (2000.00); PUNP3 (2000.00)	ADK1 (1.11); ADKd (1.11); ADSL1 (1.11); ADSL2 (1.11); ADSS (1.11); AICART (1.11); AIRCr (1.11); ASPCTr (1.11); ATPM (1.00); CTPS2 (1.11); CYTDK1 (1.11); CYTDe (1.11); CYTK1 (1.11); CYTK12 (1.11); CYTK1m (1.11); DADNK (1.11); DCMPDA (1.11); DGK1 (1.11); DHORTS (1.11); DURIK1 (1.11); DURIPP (1.11); DUTPDPm (1.11); GARFT (1.11); GK1 (1.11); GLUPRT (1.11); GUAPRT (1.08); IMPC (1.11); NDPK1 (1.11); ND…	64	20.2714	20.2964	-0.0250073	-0.00039074
Oxidative Phosphorylation	0	0	0	0	5						ATPS4m (0.93); CYOOm3 (0.96); CYOR_u10m (0.96); NADH2_u10m (0.96); PPAm (1.11)	5	22.7355	23.8924	-1.1569	-0.231381
Pantothenate And Coa Biosynthesis	0	0	0	0	1						VALTA (0.98)	1	0.0408642	0.0417453	-0.000881101	-0.000881101
Propanoate Metabolism	0	0	0	3	5					2HBO (2000.00); APAT2rm (2000.00); MMSAD3m (2000.00)	ACCOAC (1.11); MMEm (0.98); MMMm (0.98); PPCOACm (0.98); SUCOAS1m (0.97)	8	1.81809	3.4807	-1.66261	-0.207827
Pseudoreactions	1	3	1	1	31	EX_arg__L_e (10.54)	EX_glu__L_e (0.60); EX_nh4_e (0.66); EX_pro__L_e (0.12)		EX_urea_e (1000.00)	EX_2hb_e (2000.00)	EX_C02470_e (1.11); EX_acac_e (0.90); EX_ala__L_e (1.01); EX_asn__L_e (1.11); EX_asp__L_e (1.00); EX_cgly_e (1.00); EX_chol_e (1.11); EX_chsterol_e (1.11); EX_co2_e (0.97); EX_cys__L_e (1.11); EX_glc__D_e (0.99); EX_gln__L_e (1.00); EX_gthrd_e (1.00); EX_h2o2_e (0.99); EX_h2o_e (0.95); EX_h_e (0.99); EX_his__L_e (1.11); EX_ile__L_e (1.00); EX_inost_e (1.11); EX_leu__L_e (1.11); EX_lys__L_e (1.00)…	37	52.5707	53.2759	-0.70522	-0.01906
Purine Catabolism	0	0	0	1	3					PUNP3 (2000.00)	PUNP2 (1.11); PUNP4 (1.11); r0276 (1.11)	4	0.00728853	0.00670503	0.000583501	0.000145875
Redox & Pentose Metabolism	0	0	3	0	9				FBA (1000.00); G6PDH1rer (1000.00); PGLer (1000.00)		G6PDH2r (1.04); GALU (1.11); GND (1.11); ICDHym (0.97); PGL (1.04); PPM (1.08); PRPPS (1.09); RPI (1.11); r0130 (1.00)	12	5.84855	0.92849	4.92006	0.410005
Starch And Sucrose Metabolism	1	0	0	0	2	HEX1 (868.37)					GLBRAN (1.11); GLGNS1 (1.11)	3	4.94875	0.00611582	4.94264	1.64755
Taurine And Hypotaurine Metabolism	0	0	0	0	1						GLUDxm (1.00)	1	0.480083	0.482004	-0.00192089	-0.00192089
Terpenoid Backbone Biosynthesis	0	0	0	0	2						ACACT1r (1.11); HMGCOASim (0.98)	2	0.0624818	0.061278	0.00120381	0.000601907
Transport, Endoplasmic Reticulum	0	0	13	0	1				CO2ter (1000.00); DAG_HSter (1000.00); G6Pter (1000.00); H2Oter (1000.00); HUMANGEM_MAR00466 (1000.00); HUMANGEM_MAR00730 (1000.00); HUMANGEM_MAR00771 (1000.00); HUMANGEM_MAR03953 (1000.00); HUMANGEM_MAR08526 (1000.00); HUMANGEM_MAR08737 (1000.00); PIter (1000.00); PPItr (1000.00); r0998 (1000.00)		PE_HSter (1.11)	14	0.0053131	0.00040627	0.00490683	0.000350488
Transport, Endosomal	1	0	0	0	2	LYSt5r (1.83)					LEUt4 (1.11); LPCHOLt (1.11)	3	0.115529	0.0687747	0.0467547	0.0155849
Transport, Nuclear	0	0	0	0	4						DIDPtn (1.11); DITPtn (1.11); DTDPtn (1.11); DTTPtn (1.11)	4	0.00125898	0.00113756	0.000121423	3.03556e-05
Transport, Peroxisomal	0	0	0	0	4						H2O2tp (0.99); HUMANGEM_MAR07705 (0.99); HUMANGEM_MAR07707 (0.99); O2tp (0.99)	4	38.9969	39.3453	-0.348415	-0.0871038
Unknown	0	0	0	0	1						LCAT1e (1.11)	1	0.00236991	0.00214134	0.000228567	0.000228567
Vitamin C Metabolism	0	0	0	0	1						ASCBOX (0.96)	1	0.0308755	0.0320712	-0.00119567	-0.00119567
