# Supplementary material
Source: Research Square preprint supplement (doi:10.21203/rs.3.rs-9275884/v1)
Supplement: Supplementary file 6 [file eef470c268387ad84aec683a.xlsx]

## Sheet: Sheet1
Individual ID	Dataset Sample ID	Growth group	Sibling pair ID	Father	Grandfather ID	Mother	Grandmother ID	Date of slaughter	Average Daily Gain (ADG), g	Difference of ADG, %	Total Protein, g/L	Albumin, g/L	Globulin, g/L	A/G ratio	Creatinine, µM/L	Glucose, mM/L	Total Bilirubin, µM/L	Triglycerides, mM/L	Cholesterol, mM/L	ALT, IU/L	AST, IU/L	De Ritis ratio (AST/ALT)	Ca, mM/L	P, mM/L	Ca/P ratio	Mg, mM/L	Fe, µM/L	Chlorides, mM/L	Breast meat, moisture %	Breast meat, protein %	Breast meat, fat %	Breast meat, ash %	Drumstick, moisture %	Drumstick, protein %	Drumstick, fat %	Drumstick, ash %	Live weight at 1 day, g	9-week weight, g	Average Daily Gain, g	Carcass weight, g	Slaughter yield, %	Breast weight, g	Thigh weight, g	Drumstick weight, g	Kidneys, g	Heart, g	Liver, g	Stomach, g	Intestines, g
4928	MS3737	Fast-growing (FG)	6	MS4193	2k_3208	MS4195	3173	12/27/2021	31.9841	28.754	33.3	13.6	19.7	0.69	26.49	15.67	0.42	0.36	4.05	8.1	257.2	31.75	3.06	2.13	1.44	1.14	18.63	117.5	74.34	23.8	0.65	1.21	74.36	20.59	3.92	1.13	33	2015	31	1545	76.7	462	122	97	12	10	34	24	58
4900	MS_3719	Fast-growing (FG)	10	MS4200	3k_3171	MS4199	3168	12/27/2021	33.9683	21.2465	42.1	13.5	28.6	0.47	28.61	14.15	0.48	0.35	3.73	7.6	228.7	30.09	3.37	2.35	1.43	1.07	22.97	116.5	73.31	24.07	1.44	1.18	74.56	21.11	3.16	1.17	42	2140	33	1570	73.4	417	115	101	15	12	36	22	81
5056	MS4162	Fast-growing (FG)	8	MS4193	2k_3208	MS4195	3173	3/28/2022	35.3968	31.5634	34.4	14.5	19.9	0.73	30.73	13.79	0.56	0.3	3.32	7.1	187	26.34	3.03	2.04	1.49	0.9	21.45	112.5	71.94	24.51	2.23	1.32	74.53	21.12	3.27	1.08	35	2230	35	1500	67.3	470	126	103	19	14	45	38	76
5064	MS4166	Fast-growing (FG)	7	MS4193	2k_3208	MS4195	3173	3/28/2022	35.9524	41.5625	34	13.4	20.6	0.65	31.79	13.65	1	0.22	3.56	7.9	200	25.32	2.94	2.06	1.43	0.82	18.12	112.1	72.69	24.83	1.27	1.21	72.76	21.07	5.06	1.11	36	2265	35	1710	75.5	477	137	108	16	10	43	31	73
5077	MS4172	Fast-growing (FG)	4	MS4193	2k_3208	MS4194	3176	3/28/2022	37.5397	22.8571	30.7	12.8	17.9	0.72	32.85	14.52	0.68	0.21	3.22	7.1	199	28.03	2.92	2.24	1.3	0.86	18.38	113.5	72.81	24.63	1.3	1.26	73.85	21.48	3.51	1.16	40	2365	37	1670	70.6	500	133	104	16	12	41	39	67
5009	MS4144	Fast-growing (FG)	12	MS4200	3k_3171	MS4199	3168	3/2/2022	37.8571	41.9643	33.9	12.3	21.6	0.57	34.98	14.98	0.78	0.2	4.02	5.1	258.5	50.69	2.6	1.94	1.34	0.83	18.24	109.41	73.77	24.17	0.9	1.16	73.94	22.19	2.74	1.13	38	2385	37	1765	74	453	129	115	15	14	46	43	65
5068	MS4167	Fast-growing (FG)	3	MS4193	2k_3208	MS4194	3176	3/28/2022	37.9365	36.5714	34.2	12.7	21.5	0.59	29.67	14.79	0.98	0.22	3.37	6.3	258	40.95	3.18	2.15	1.48	0.88	17.33	116	73.81	23.77	1.16	1.26	74.6	21.71	2.67	1.02	38	2390	37	1795	75.1	511	126	111	21	12	40	32	78
4947	MS3754	Fast-growing (FG)	2	MS4193	2k_3208	MS4194	3176	1/10/2022	38.7302	41.0405	37.5	14.1	23.4	0.6	26.49	16.76	0.7	0.83	3.14	7.1	231.5	32.61	2.3	1.64	1.4	1.24	22.17	121	74.01	23.97	0.86	1.16	75.14	21.32	2.43	1.11	36	2440	38	1700	69.7	530	147	102	16	11	50	65	92
5118	MS4184	Fast-growing (FG)	9	MS4193	2k_3208	MS4195	3173	5/4/2022	39.2063	69.1781	31.9	13.2	18.7	0.705882	28.43	12.48	1.16	0.37	3.4	8.5	264.1	31.07	2.45	1.69	1.45	1.11	20.62	110.6	74.22	23.65	0.91	1.22	75.52	20.55	2.88	1.05	38	2470	39	1795	72.7	581	137	113	17	11	48	36	75
5011	MS4146	Fast-growing (FG)	11	MS4200	3k_3171	MS4199	3168	3/2/2022	40.5556	53.4535	32.7	12.3	20.4	0.6	34.98	14.06	0.56	0.19	3.58	5.4	229.3	42.46	2.52	1.8	1.4	0.82	17.76	116.15	73.81	24.01	0.98	1.2	74.08	21.88	2.85	1.19	41	2555	40	1905	74.6	547	149	119	15	12	37	47	63
5042	MS4156	Fast-growing (FG)	1	MS4192	1k_6398	MS4191	3190	3/2/2022	40.9524	38.3378	30.8	12.7	18.1	0.7	29.67	15.86	0.64	0.17	3.03	6.8	226.1	33.25	3	2.44	1.23	0.99	17.54	114.4	74.27	23.6	0.95	1.18	73.95	20.56	4.58	0.91	33	2580	40	1970	76.4	547	163	129	13	15	46	27	96
5115	MS4183	Fast-growing (FG)	5	MS4193	2k_3208	MS4194	3176	5/4/2022	42.5397	26.7139	32.4	12.7	19.7	0.64467	33.7	12.73	0.52	0.42	3.14	13.8	415.5	30.11	2.4	1.96	1.22	0.82	19.53	110.8	74.14	23.64	1.02	1.2	74.31	21.23	3.33	1.13	46	2680	42	2015	75.2	633	139	113	18	11	50	28	70
5125	MS4187	Slow-growing (SG)	9	MS4193	2k_3208	MS4195	3173	5/4/2022	23.1746	69.1781	46.1	13.6	32.5	0.418462	35.81	14.96	1.69	0.75	4.07	9.1	271.8	29.87	3.08	2.13	1.45	1.26	17.58	109.4	74.68	22.92	1.11	1.29	74.35	22.03	2.55	1.07	36	1460	23	1005	68.8	271	67	77	15	11	50	22	42
4916	MS_3729	Slow-growing (SG)	6	MS4193	2k_3208	MS4195	3173	12/27/2021	24.8413	28.754	46.3	13.4	32.9	0.41	29.67	14.32	0.6	0.41	3.88	6.8	189.7	27.9	3.32	2.25	1.48	1.16	30.13	118.1	74.65	23.14	1.03	1.18	74.33	19.76	4.68	1.23	33	1565	24	1120	71.6	287	85	74	12	10	33	25	67
5061	MS4164	Slow-growing (SG)	7	MS4193	2k_3208	MS4195	3173	3/28/2022	25.3968	41.5625	36.8	13.6	23.2	0.59	29.67	13.71	0.65	0.26	3.88	6.8	200	29.41	3.11	2.14	1.45	0.91	21.52	112.8	72.43	24.83	1.57	1.17	72.71	21.43	4.76	1.1	35	1600	25	1175	73.4	306	91	73	14	9	35	36	50
5044	MS4157	Slow-growing (SG)	11	MS4200	3k_3171	MS4199	3168	3/2/2022	26.4286	53.4535	31.6	11.8	19.8	0.6	27.55	15.08	0.41	0.21	3.23	5.2	176.7	33.98	3.01	2.35	1.28	0.85	15.7	114.3	73.34	24.83	0.73	1.1	74.43	21.73	2.76	1.08	40	1665	26	1180	70.9	327	93	81	10	9	33	35	65
4992	MS4137	Slow-growing (SG)	12	MS4200	3k_3171	MS4199	3168	3/2/2022	26.6667	41.9643	35.4	12.3	23.1	0.53	31.48	13.85	0.58	0.23	3.93	4.8	189.6	39.5	2.41	2.05	1.18	0.76	14.16	105.05	73.22	24.81	0.86	1.11	73.67	22.05	3.17	1.11	40	1680	26	1320	78.6	352	99	85	12	7	29	42	62
5081	MS4174	Slow-growing (SG)	8	MS4193	2k_3208	MS4195	3173	3/28/2022	26.9048	31.5634	34.5	14.6	19.9	0.73	33.91	12.77	1.01	0.23	3.87	6.6	236	35.76	3.21	2.25	1.43	0.83	18.27	112	73.66	23.58	1.55	1.21	72.97	20.39	5.57	1.07	38	1695	26	1232	72.7	345	94	79	15	13	35	26	55
4959	MS3765	Slow-growing (SG)	2	MS4193	2k_3208	MS4194	3176	1/10/2022	27.4603	41.0405	37.4	14	23.4	0.6	27.55	14.85	0.48	0.49	2.89	7.1	228.7	32.21	2.88	1.98	1.45	1.13	24.04	118.7	73.48	24.48	0.85	1.19	73.34	19.94	5.59	1.13	33	1730	27	1260	72.8	378	99	79	11	7	35	36	66
5076	MS4171	Slow-growing (SG)	3	MS4193	2k_3208	MS4194	3176	3/28/2022	27.7778	36.5714	37.4	14.2	23.2	0.61	36.03	16.75	0.8	0.15	3.18	10	189	18.9	3.04	2.39	1.27	0.92	21.38	116.7	73.54	23.95	1.34	1.17	72.56	22.25	4	1.19	38	1750	27	1272	72.7	359	103	82	11	10	33	32	53
4906	MS_3722	Slow-growing (SG)	10	MS4200	3k_3171	MS4199	3168	12/27/2021	28.0159	21.2465	50.6	14.4	36.2	0.4	30.73	14.86	0.39	0.33	4.37	5.2	215.7	41.48	3.37	2.41	1.4	1.23	24.96	114.7	74.11	23.84	0.89	1.16	73.58	22.14	3.13	1.15	46	1765	27	1280	72.5	337	100	84	12	13	33	27	62
5019	MS4149	Slow-growing (SG)	1	MS4192	1k_6398	MS4191	3190	3/2/2022	29.6032	38.3378	33	12.1	20.9	0.58	37.31	15.08	0.36	0.16	3.41	8.8	232	26.36	2.55	2.04	1.25	0.81	19	106.24	74.17	23.64	1.01	1.18	73.73	21.73	3.42	1.12	38	1865	29	1325	71	380	110	87	12	7	34	37	56
5073	MS4169	Slow-growing (SG)	4	MS4193	2k_3208	MS4194	3176	3/28/2022	30.5556	22.8571	31.9	12.5	19.4	0.64	36.03	13.92	0.69	0.48	3.16	8.1	223	27.53	2.98	2.27	1.31	0.88	23.84	117.2	72.78	24.55	1.16	1.51	72.61	23.03	3.29	1.07	38	1925	30	1352	70.2	412	113	85	14	9	44	25	52
5120	MS4185	Slow-growing (SG)	5	MS4193	2k_3208	MS4194	3176	5/4/2022	33.5714	26.7139	35.4	13.4	22	0.609091	32.65	14.28	1.22	0.37	2.94	12	216.5	18.04	2.54	1.76	1.44	0.9	24.92	113.7	73.45	24.53	0.91	1.11	74.32	21.73	2.83	1.12	40	2115	33	1515	71.6	463	121	95	13	11	34	30	54
[truncated: 1 more columns]
